# Supplementary material
Source: bioRxiv or medRxiv preprint supplement (https://www.biorxiv.org/highwire/filestream/54518/field_highwire_adjunct_files/11/178806-9.pdf)
Supplement: Supplementary file [file 178806-9.pdf]

## Supplementary Figure S9

Each of the subsequent pages shows the local association plots for the 368 SNP-IDP associations listed in **Supplementary Table S2**. In the top panel SNPs are plotted by their positions on the chromosome against association with the IDP ( $-\log_{10}$  P value) on the left y axis. Points are coloured by their local linkage disequilibrium (LD) pattern with the focal SNP (purple diamond). Below the main plot are two tracks that show existing GWAS associations, and position and orientation of local genes.

# FAST\_ROIs\_V\_cerebellum\_VIIla

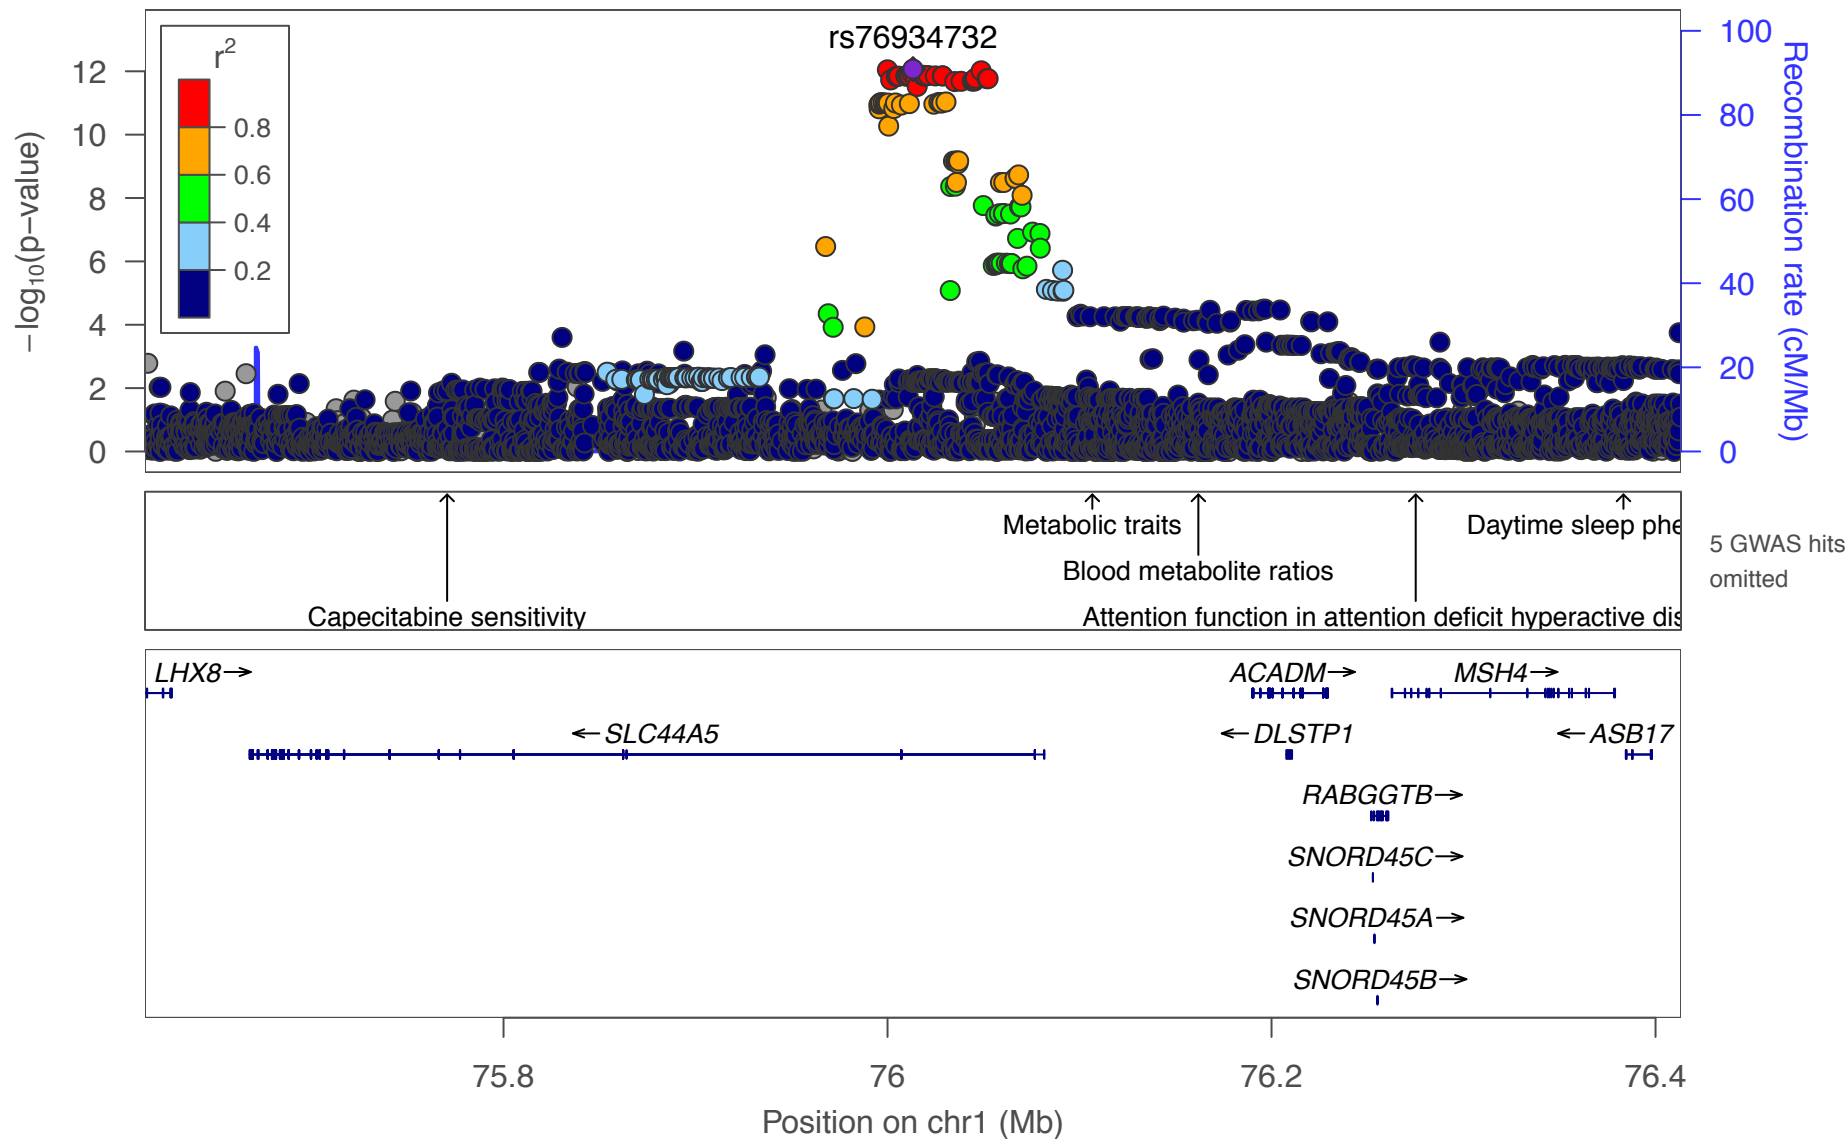

date: Thu Aug 17 17:58:46 2017

build: hg19

display range: chr1:75613268–76413268 [75613268–76413268]

hilite range: 0 – 0 [ 0 – 0 ]

reference SNP: chr1:76013268

number of SNPs plotted: 3686

min P.value: 8.51E–13 [chr1:76013268]

max P.value: 10E–1 [chr1:75725482]

omitted GWAS Hits: chr1:76.383297–Daytime sleep phenotypes, NA

omitted GWAS Hits: NA, NA

## GWAS Catalog SNPs in Region

| <b>chr</b> | <b>pos (Mb)</b> | <b>trait</b>                                                 | <b>snp</b> |
|------------|-----------------|--------------------------------------------------------------|------------|
| 1          | 75.77062        | Capecitabine sensitivity                                     | rs1249675  |
| 1          | 75.91383        | Whole-brain volume (Alzheimer's disease interaction)         | rs1857353  |
| 1          | 76.10667        | Metabolic traits                                             | rs211718   |
| 1          | 76.13595        | Acylcarnitine levels                                         | rs7552404  |
| 1          | 76.13595        | Blood metabolite levels                                      | rs7552404  |
| 1          | 76.16189        | Blood metabolite ratios                                      | rs4949874  |
| 1          | 76.16862        | Daytime sleep phenotypes                                     | rs815306   |
| 1          | 76.21633        | Blood metabolite levels                                      | rs11161521 |
| 1          | 76.27510        | Attention function in attention deficit hyperactive disorder | rs1144333  |
| 1          | 76.38330        | Daytime sleep phenotypes                                     | rs10782582 |

# TBSS\_ICVF\_Genu\_of\_corpus\_callosum

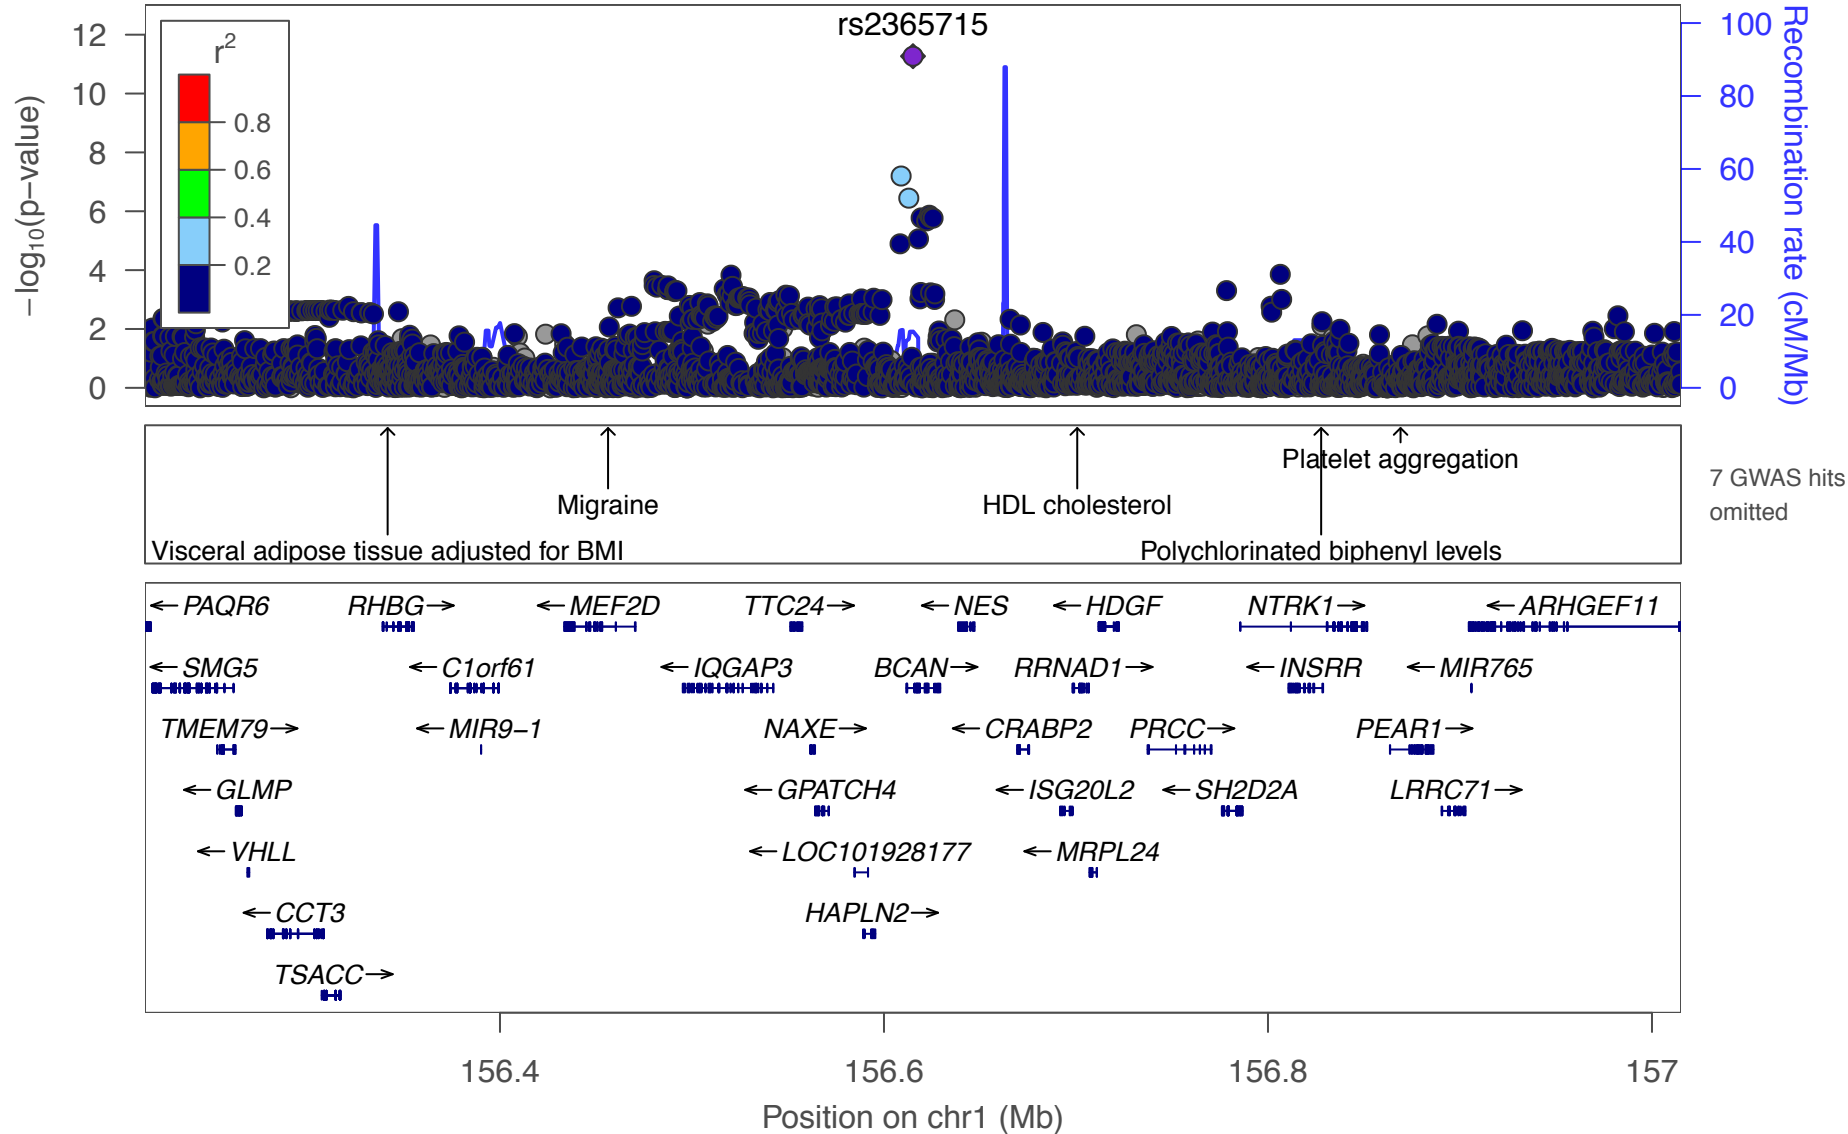

date: Thu Aug 17 18:11:30 2017

build: hg19

display range: chr1:156215114–157015114 [156215114–157015114]

hilite range: 0 – 0 [ 0 – 0 ]

reference SNP: chr1:156615114

number of SNPs plotted: 3160

min P.value: 5.38E–12 [chr1:156615114]

max P.value: 10E–1 [chr1:156796697]

omitted GWAS Hits: chr1:156.700651–HDL cholesterol, chr1:156.827703–Polychlorinated biphenyl levels

omitted GWAS Hits: NA, NA

omitted GWAS Hits: NA

## GWAS Catalog SNPs in Region

| <b>chr</b> | <b>pos (Mb)</b> | <b>trait</b>                              | <b>snp</b>  |
|------------|-----------------|-------------------------------------------|-------------|
| 1          | 156.2555        | Glycated hemoglobin levels                | rs6684514   |
| 1          | 156.2555        | Mean corpuscular hemoglobin concentration | rs6684514   |
| 1          | 156.3415        | Visceral adipose tissue adjusted for BMI  | rs7525133   |
| 1          | 156.3565        | Subcutaneous adipose tissue               | rs6686886   |
| 1          | 156.4462        | Migraine                                  | rs2274316   |
| 1          | 156.4462        | Migraine – clinic-based                   | rs2274316   |
| 1          | 156.4507        | Migraine                                  | rs1925950   |
| 1          | 156.4563        | Migraine                                  | rs3790455   |
| 1          | 156.4565        | Resting heart rate                        | rs1171563   |
| 1          | 156.7007        | HDL cholesterol                           | rs12145743  |
| 1          | 156.8277        | Polychlorinated biphenyl levels           | rs115699453 |
| 1          | 156.8690        | Platelet aggregation                      | rs12566888  |

# T2\_FLAIR\_BIANCA\_WMH\_volume

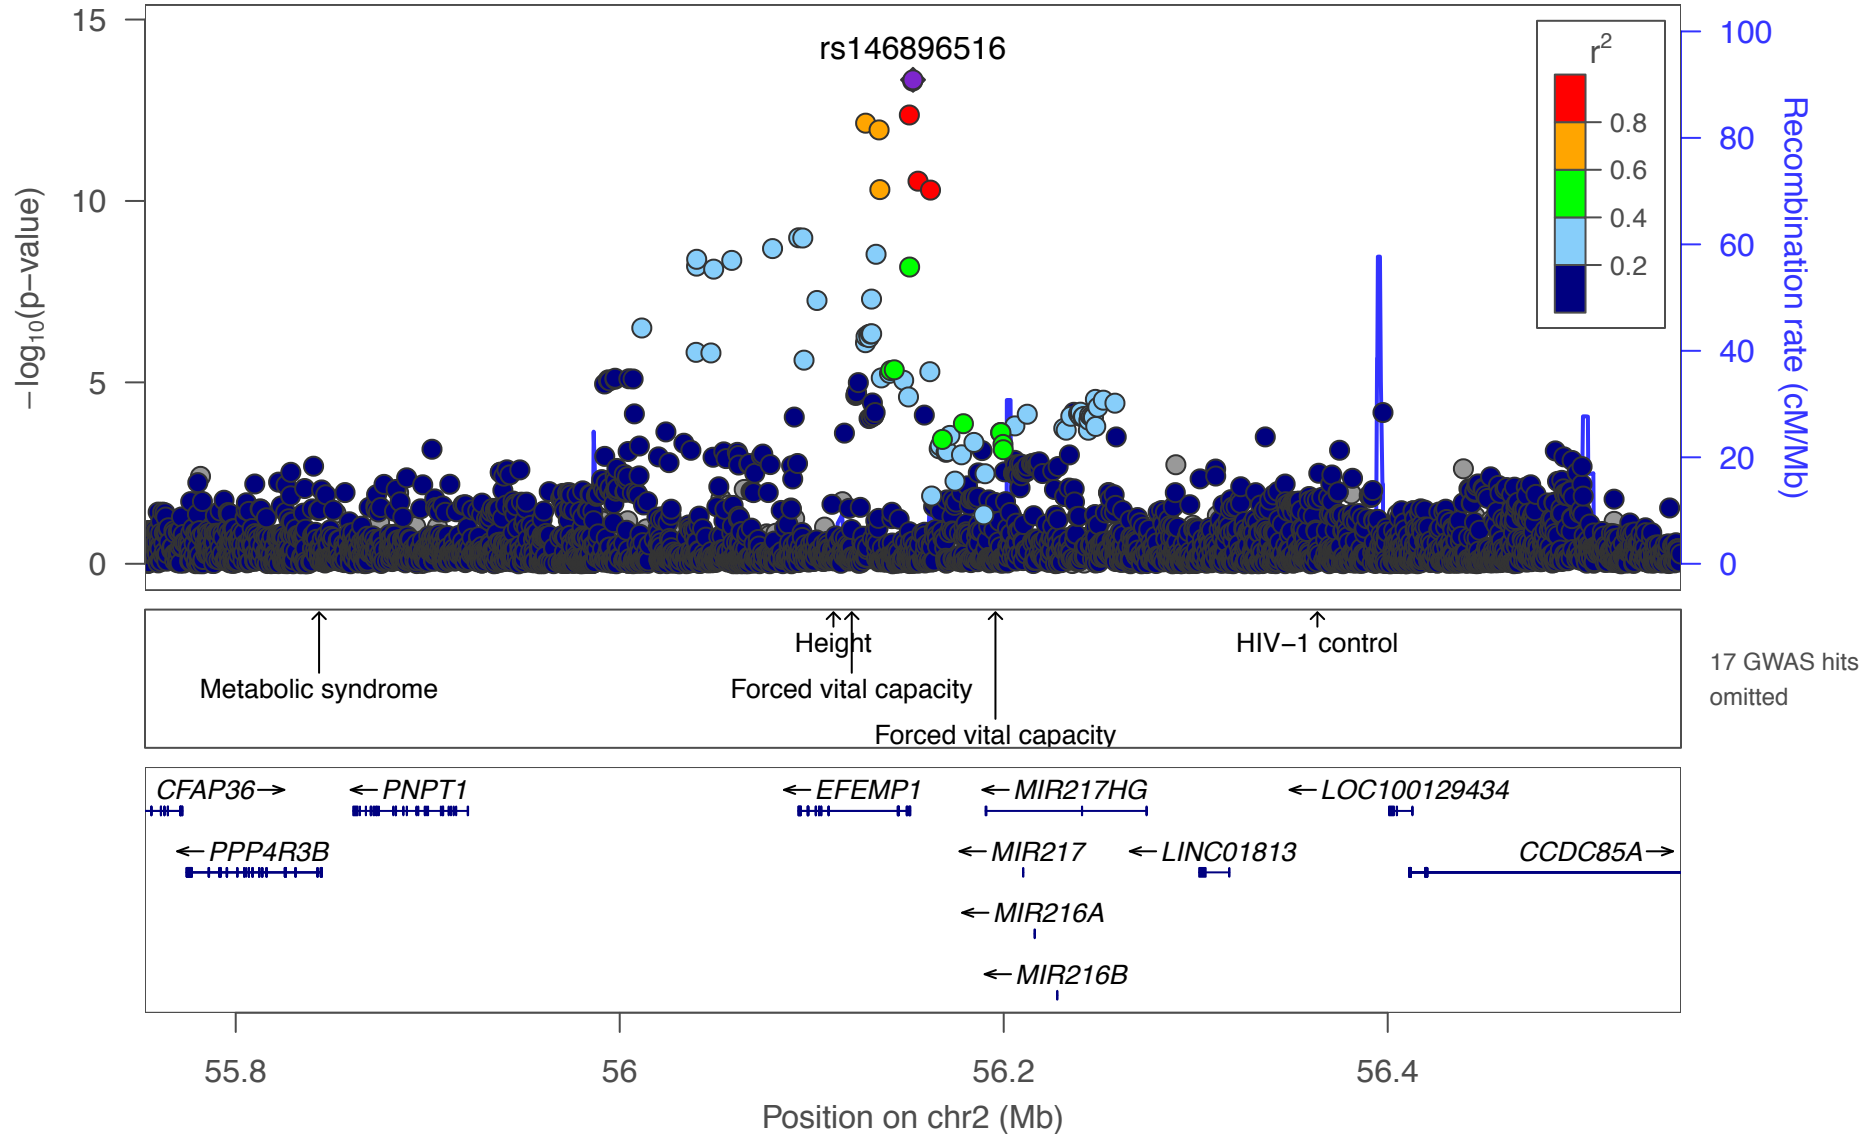



date: Thu Aug 17 18:04:38 2017

build: hg19

display range: chr2:55752750–56552750 [55752750–56552750]

hilite range: 0 – 0 [ 0 – 0 ]

reference SNP: chr2:56152750

number of SNPs plotted: 4119

min P.value: 4.58E–14 [chr2:56152750]

max P.value: 10E–1 [chr2:56359853]

omitted GWAS Hits: NA, NA

GWAS Catalog SNPs in Region

| chr | pos (Mb) | trait                                                      | snp         |
|-----|----------|------------------------------------------------------------|-------------|
| 2   | 55.84341 | Metabolic syndrome                                         | rs782590    |
| 2   | 55.97373 | IgG glycosylation                                          | rs2163237   |
| 2   | 56.00890 | Amyotrophic lateral sclerosis                              | rs7577894   |
| 2   | 56.01221 | Inguinal hernia                                            | rs2009262   |
| 2   | 56.02587 | 3-hydroxy-1-methylpropylmercapturic acid levels in smokers | rs74760234  |
| 2   | 56.06718 | Height                                                     | rs4146922   |
| 2   | 56.08954 | Height                                                     | rs1367226   |
| 2   | 56.09689 | Height                                                     | rs3791679   |
| 2   | 56.09689 | Waist circumference adjusted for body mass index           | rs3791679   |
| 2   | 56.10833 | Optic cup area                                             | rs1346786   |
| 2   | 56.11131 | Height                                                     | rs3791675   |
| 2   | 56.12085 | Forced vital capacity                                      | rs1430193   |
| 2   | 56.13510 | White matter hyperintensity burden                         | rs78857879  |
| 2   | 56.15656 | Post bronchodilator FEV1/FVC ratio                         | rs180765220 |
| 2   | 56.18293 | Post bronchodilator FEV1/FVC ratio                         | rs190486114 |
| 2   | 56.19147 | Schizophrenia                                              | rs2868985   |
| 2   | 56.19570 | Forced vital capacity                                      | rs62164511  |
| 2   | 56.19715 | Post bronchodilator FEV1/FVC ratio                         | rs186819721 |
| 2   | 56.19780 | Post bronchodilator FEV1/FVC ratio                         | rs138402956 |
| 2   | 56.21767 | Post bronchodilator FEV1/FVC ratio                         | rs182751789 |
| 2   | 56.25550 | Pelvic organ prolapse (moderate/severe)                    | rs3850352   |

## GWAS Catalog SNPs in Region

| chr | pos (Mb) | trait         | snp       |
|-----|----------|---------------|-----------|
| 2   | 56.36338 | HIV-1 control | rs6751715 |

# netmat\_edge\_ICA\_001

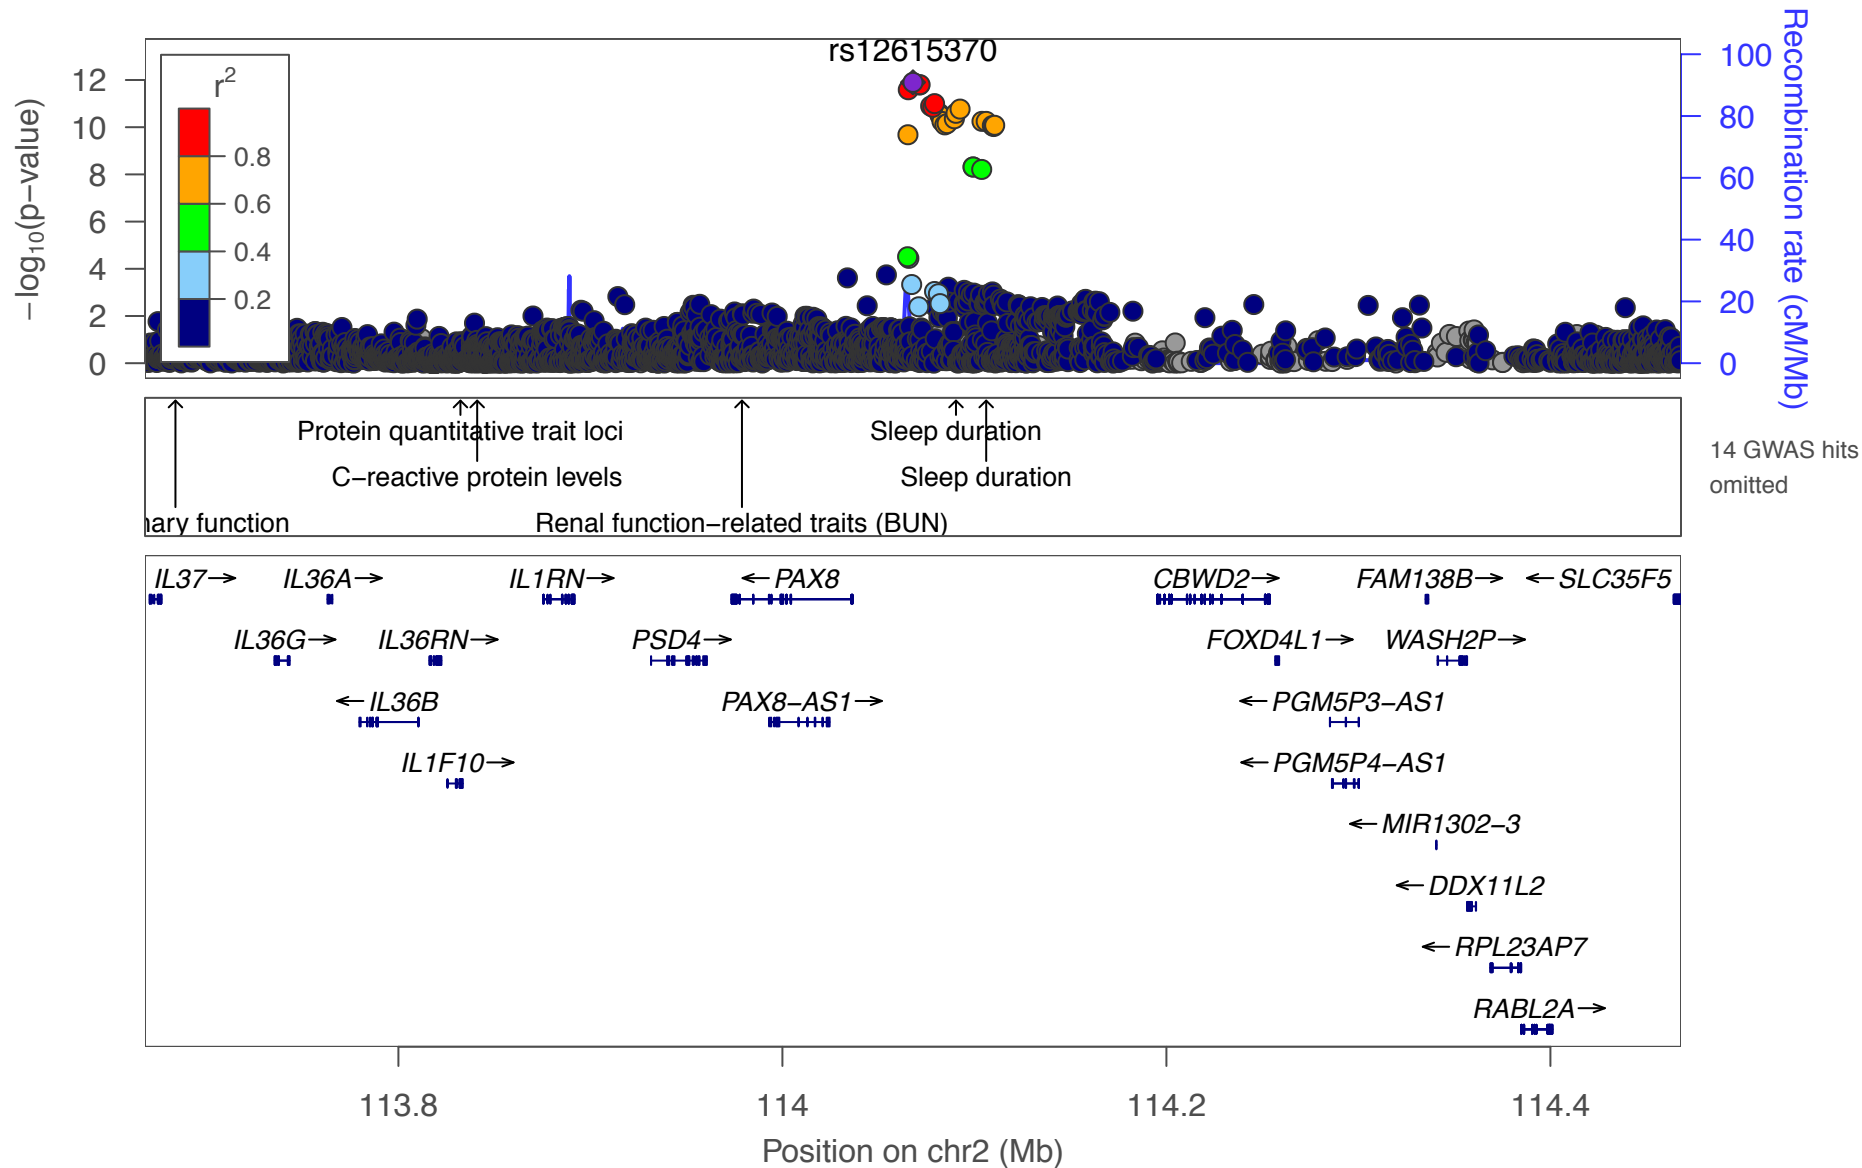

date: Sat Aug 19 17:32:05 2017

build: hg19

display range: chr2:113668017–114468017 [113668017–114468017]

hilite range: 0 – 0 [ 0 – 0 ]

reference SNP: chr2:114068017

number of SNPs plotted: 3145

min P.value: 1.26E–12 [chr2:114068017]

max P.value: 10E–1 [chr2:114446440]

omitted GWAS Hits: chr2:113.97894–Renal function–related traits (BUN), chr2:114.090412–Sleep duration

omitted GWAS Hits: NA, NA

GWAS Catalog SNPs in Region

| chr | pos (Mb) | trait                                                              | snp        |
|-----|----------|--------------------------------------------------------------------|------------|
| 2   | 113.6839 | Pulmonary function                                                 | rs10864907 |
| 2   | 113.6914 | Response to amphetamines                                           | rs12467847 |
| 2   | 113.8323 | Protein quantitative trait loci                                    | rs6761276  |
| 2   | 113.8323 | Inflammatory biomarkers                                            | rs6743376  |
| 2   | 113.8378 | C-reactive protein levels or LDL-cholesterol levels (pleiotropy)   | rs12711751 |
| 2   | 113.8381 | C-reactive protein levels or triglyceride levels (pleiotropy)      | rs13409360 |
| 2   | 113.8410 | C-reactive protein levels                                          | rs6734238  |
| 2   | 113.8410 | Fibrinogen                                                         | rs6734238  |
| 2   | 113.8410 | C-reactive protein                                                 | rs6734238  |
| 2   | 113.8410 | White blood cell count                                             | rs6734238  |
| 2   | 113.8410 | Fibrinogen levels                                                  | rs6734238  |
| 2   | 113.8410 | C-reactive protein levels or total cholesterol levels (pleiotropy) | rs6734238  |
| 2   | 113.8476 | Stroke                                                             | rs11681884 |
| 2   | 113.8904 | Obesity-related traits                                             | rs4252023  |
| 2   | 113.9729 | Mucinous ovarian carcinoma                                         | rs752590   |
| 2   | 113.9789 | Renal function-related traits (BUN)                                | rs11123170 |
| 2   | 114.0164 | Mucinous ovarian carcinoma                                         | rs72831838 |
| 2   | 114.0904 | Sleep duration                                                     | rs1823125  |
| 2   | 114.1061 | Sleep duration                                                     | rs62158211 |
| 2   | 114.1061 | Sleep duration (oversleepers vs undersleepers)                     | rs62158211 |

# NODEamps25\_0012

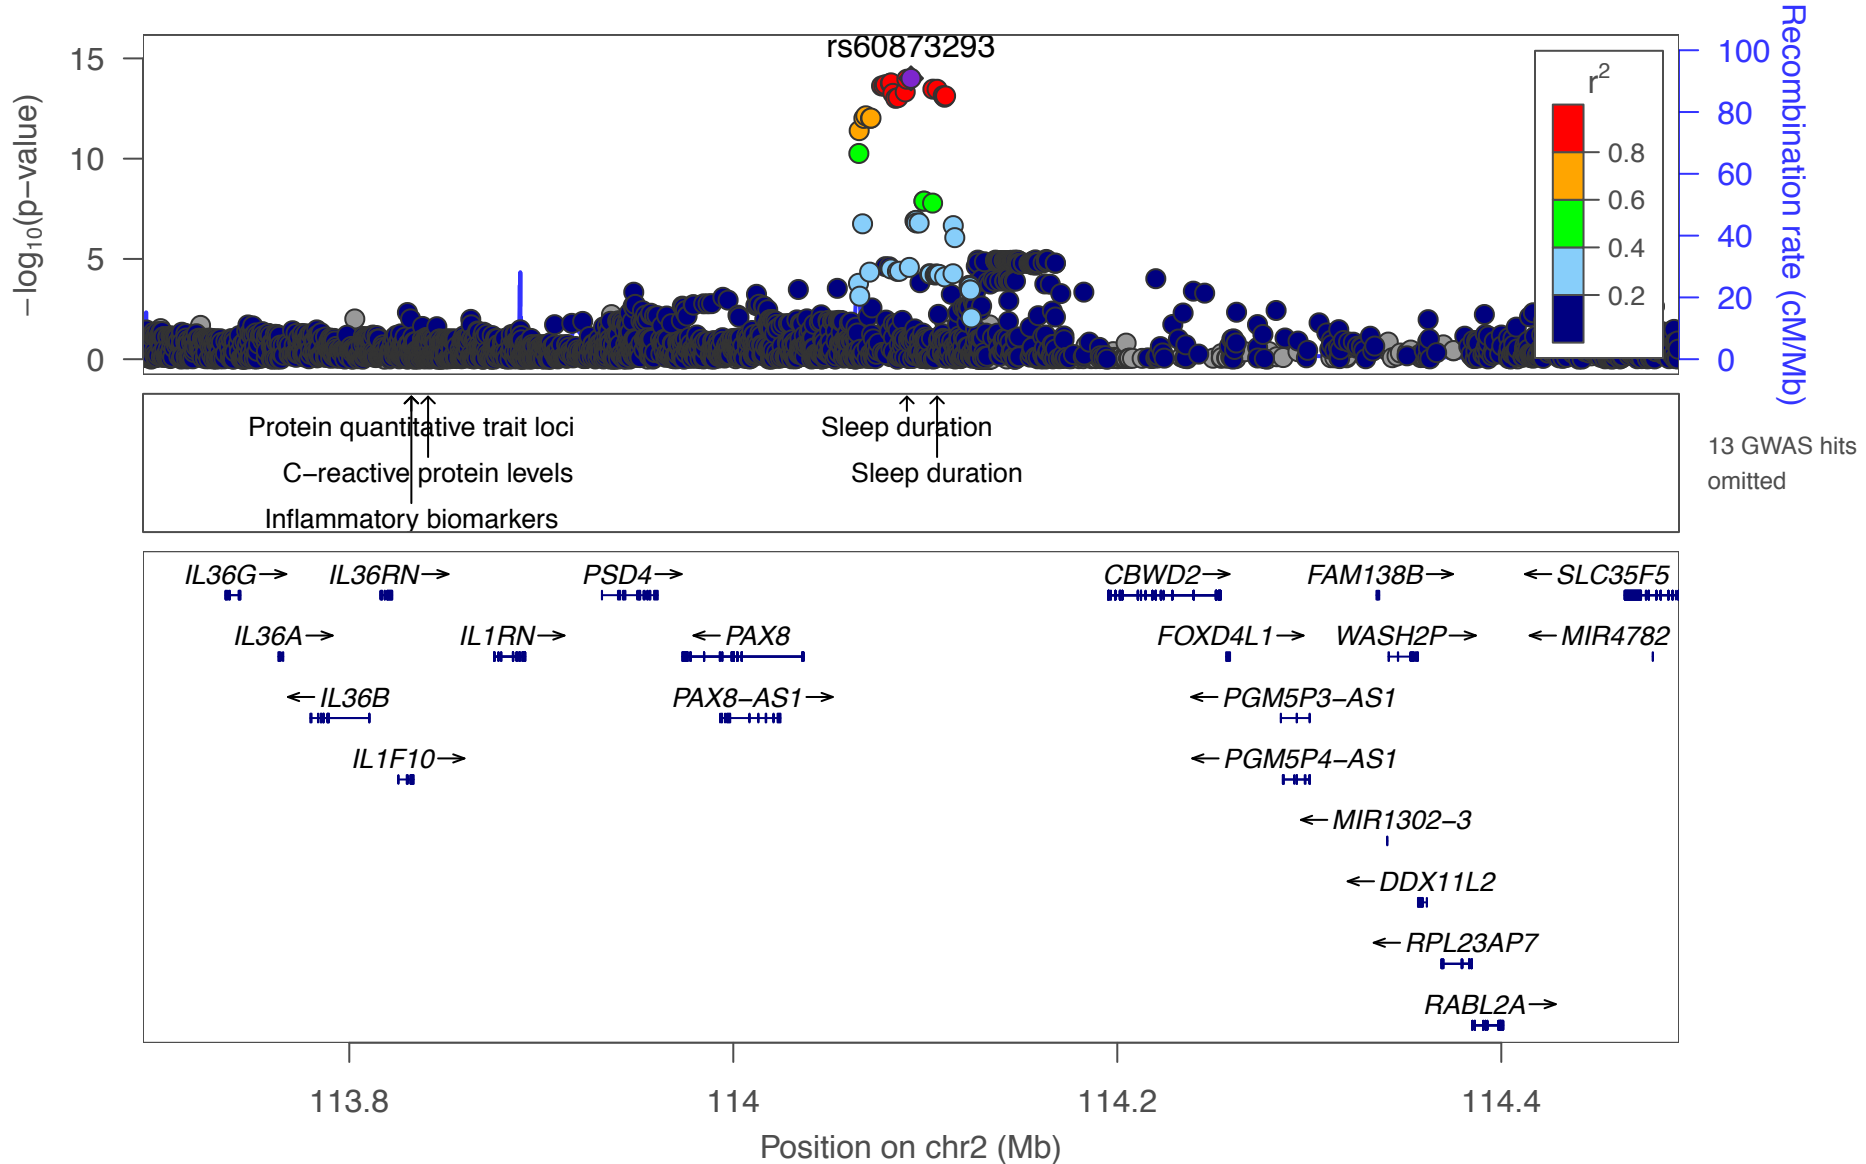

date: Thu Aug 17 18:02:20 2017

build: hg19

display range: chr2:113692549–114492549 [113692549–114492549]

hilite range: 0 – 0 [ 0 – 0 ]

reference SNP: chr2:114092549

number of SNPs plotted: 3067

min P.value: 9.86E–15 [chr2:114092549]

max P.value: 10E–1 [chr2:113762224]

omitted GWAS Hits: chr2:114.090412–Sleep duration, chr2:114.106139–Sleep duration

omitted GWAS Hits: NA, NA

omitted GWAS Hits: NA, NA

omitted GWAS Hits: NA, NA

omitted GWAS Hits: NA



GWAS Catalog SNPs in Region

| chr | pos (Mb) | trait                                                              | snp        |
|-----|----------|--------------------------------------------------------------------|------------|
| 2   | 113.8323 | Protein quantitative trait loci                                    | rs6761276  |
| 2   | 113.8323 | Inflammatory biomarkers                                            | rs6743376  |
| 2   | 113.8378 | C-reactive protein levels or LDL-cholesterol levels (pleiotropy)   | rs12711751 |
| 2   | 113.8381 | C-reactive protein levels or triglyceride levels (pleiotropy)      | rs13409360 |
| 2   | 113.8410 | C-reactive protein levels                                          | rs6734238  |
| 2   | 113.8410 | Fibrinogen                                                         | rs6734238  |
| 2   | 113.8410 | C-reactive protein                                                 | rs6734238  |
| 2   | 113.8410 | White blood cell count                                             | rs6734238  |
| 2   | 113.8410 | Fibrinogen levels                                                  | rs6734238  |
| 2   | 113.8410 | C-reactive protein levels or total cholesterol levels (pleiotropy) | rs6734238  |
| 2   | 113.8476 | Stroke                                                             | rs11681884 |
| 2   | 113.8904 | Obesity-related traits                                             | rs4252023  |
| 2   | 113.9729 | Mucinous ovarian carcinoma                                         | rs752590   |
| 2   | 113.9789 | Renal function-related traits (BUN)                                | rs11123170 |
| 2   | 114.0164 | Mucinous ovarian carcinoma                                         | rs72831838 |
| 2   | 114.0904 | Sleep duration                                                     | rs1823125  |
| 2   | 114.1061 | Sleep duration                                                     | rs62158211 |
| 2   | 114.1061 | Sleep duration (oversleepers vs undersleepers)                     | rs62158211 |

# SWI\_T2star\_left\_pallidum

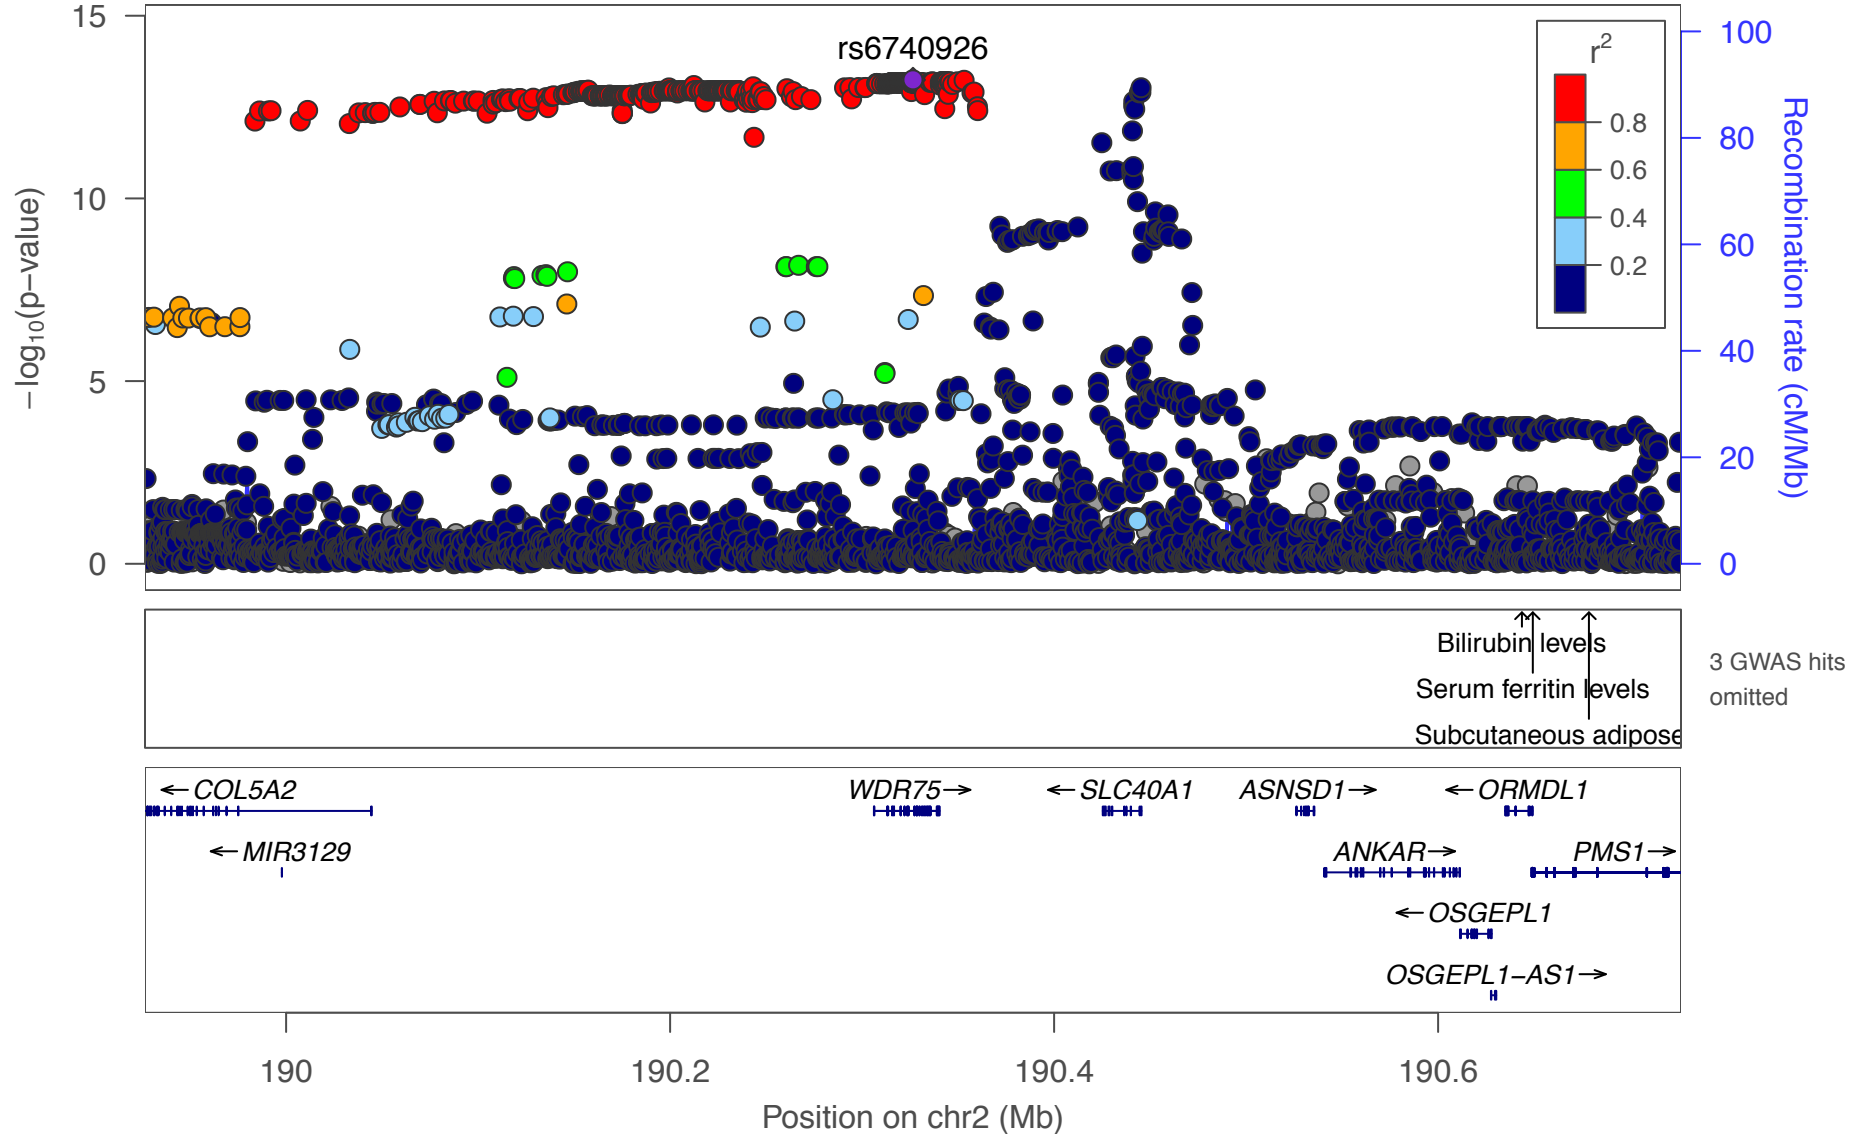

date: Thu Aug 17 18:10:54 2017

build: hg19

display range: chr2:189926498–190726498 [189926498–190726498]

hilite range: 0 – 0 [ 0 – 0 ]

reference SNP: chr2:190326498

number of SNPs plotted: 3013

min P.value: 5.68E–14 [chr2:190326498]

max P.value: 9.99E–1 [chr2:190307272]

omitted GWAS Hits: NA, NA

## GWAS Catalog SNPs in Region

| <b>chr</b> | <b>pos (Mb)</b> | <b>trait</b>                                | <b>snp</b> |
|------------|-----------------|---------------------------------------------|------------|
| 2          | 190.3787        | Iron status biomarkers (ferritin levels)    | rs744653   |
| 2          | 190.3787        | Iron status biomarkers (transferrin levels) | rs744653   |
| 2          | 190.6072        | Obesity-related traits                      | rs12053254 |
| 2          | 190.6436        | Bilirubin levels                            | rs7606224  |
| 2          | 190.6493        | Serum ferritin levels                       | rs5742933  |
| 2          | 190.6785        | Subcutaneous adipose tissue                 | rs5743030  |

# SWI\_T2star\_left\_pallidum\_plus\_right\_pallidum

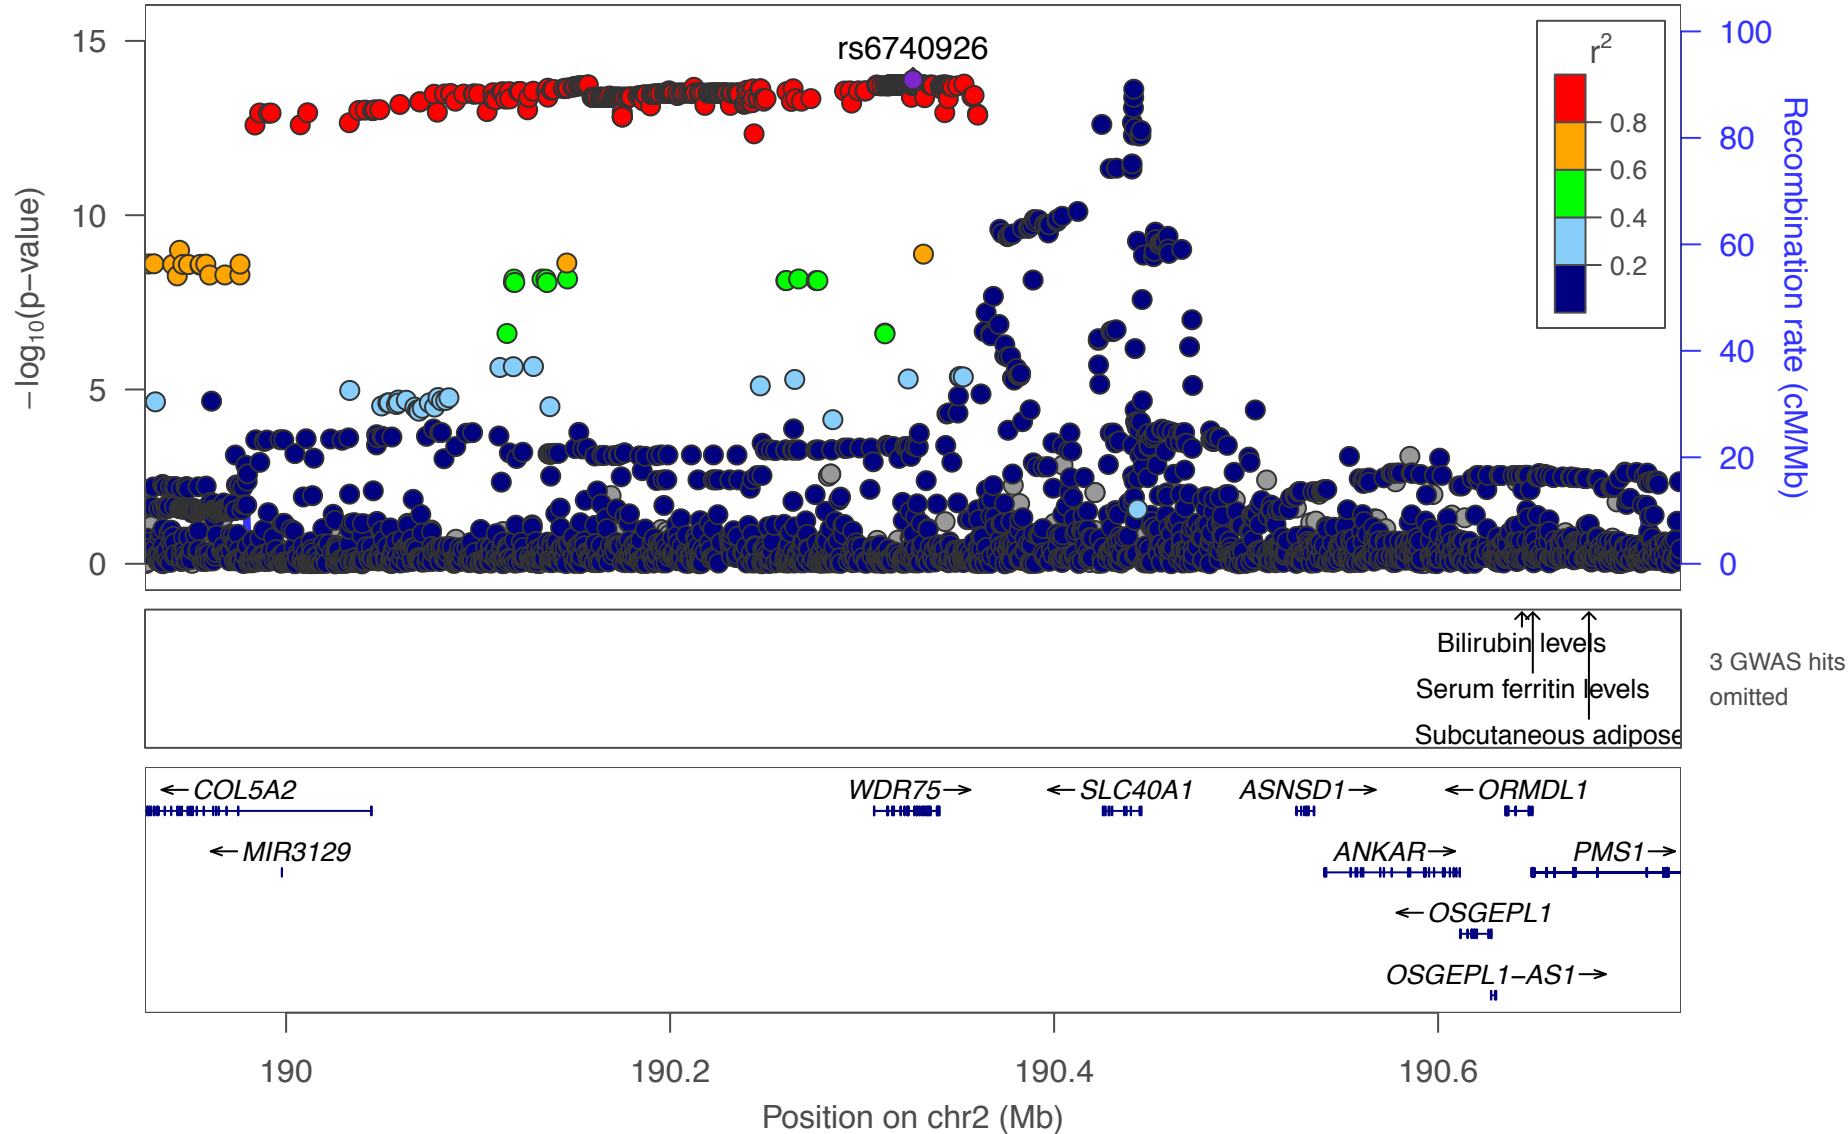

date: Thu Aug 17 18:10:54 2017

build: hg19

display range: chr2:189926498–190726498 [189926498–190726498]

hilite range: 0 – 0 [ 0 – 0 ]

reference SNP: chr2:190326498

number of SNPs plotted: 3013

min P.value: 1.31E–14 [chr2:190326498]

max P.value: 10E–1 [chr2:190039575]

omitted GWAS Hits: NA, NA

## GWAS Catalog SNPs in Region

| <b>chr</b> | <b>pos (Mb)</b> | <b>trait</b>                                | <b>snp</b> |
|------------|-----------------|---------------------------------------------|------------|
| 2          | 190.3787        | Iron status biomarkers (ferritin levels)    | rs744653   |
| 2          | 190.3787        | Iron status biomarkers (transferrin levels) | rs744653   |
| 2          | 190.6072        | Obesity-related traits                      | rs12053254 |
| 2          | 190.6436        | Bilirubin levels                            | rs7606224  |
| 2          | 190.6493        | Serum ferritin levels                       | rs5742933  |
| 2          | 190.6785        | Subcutaneous adipose tissue                 | rs5743030  |

# NET100\_1011

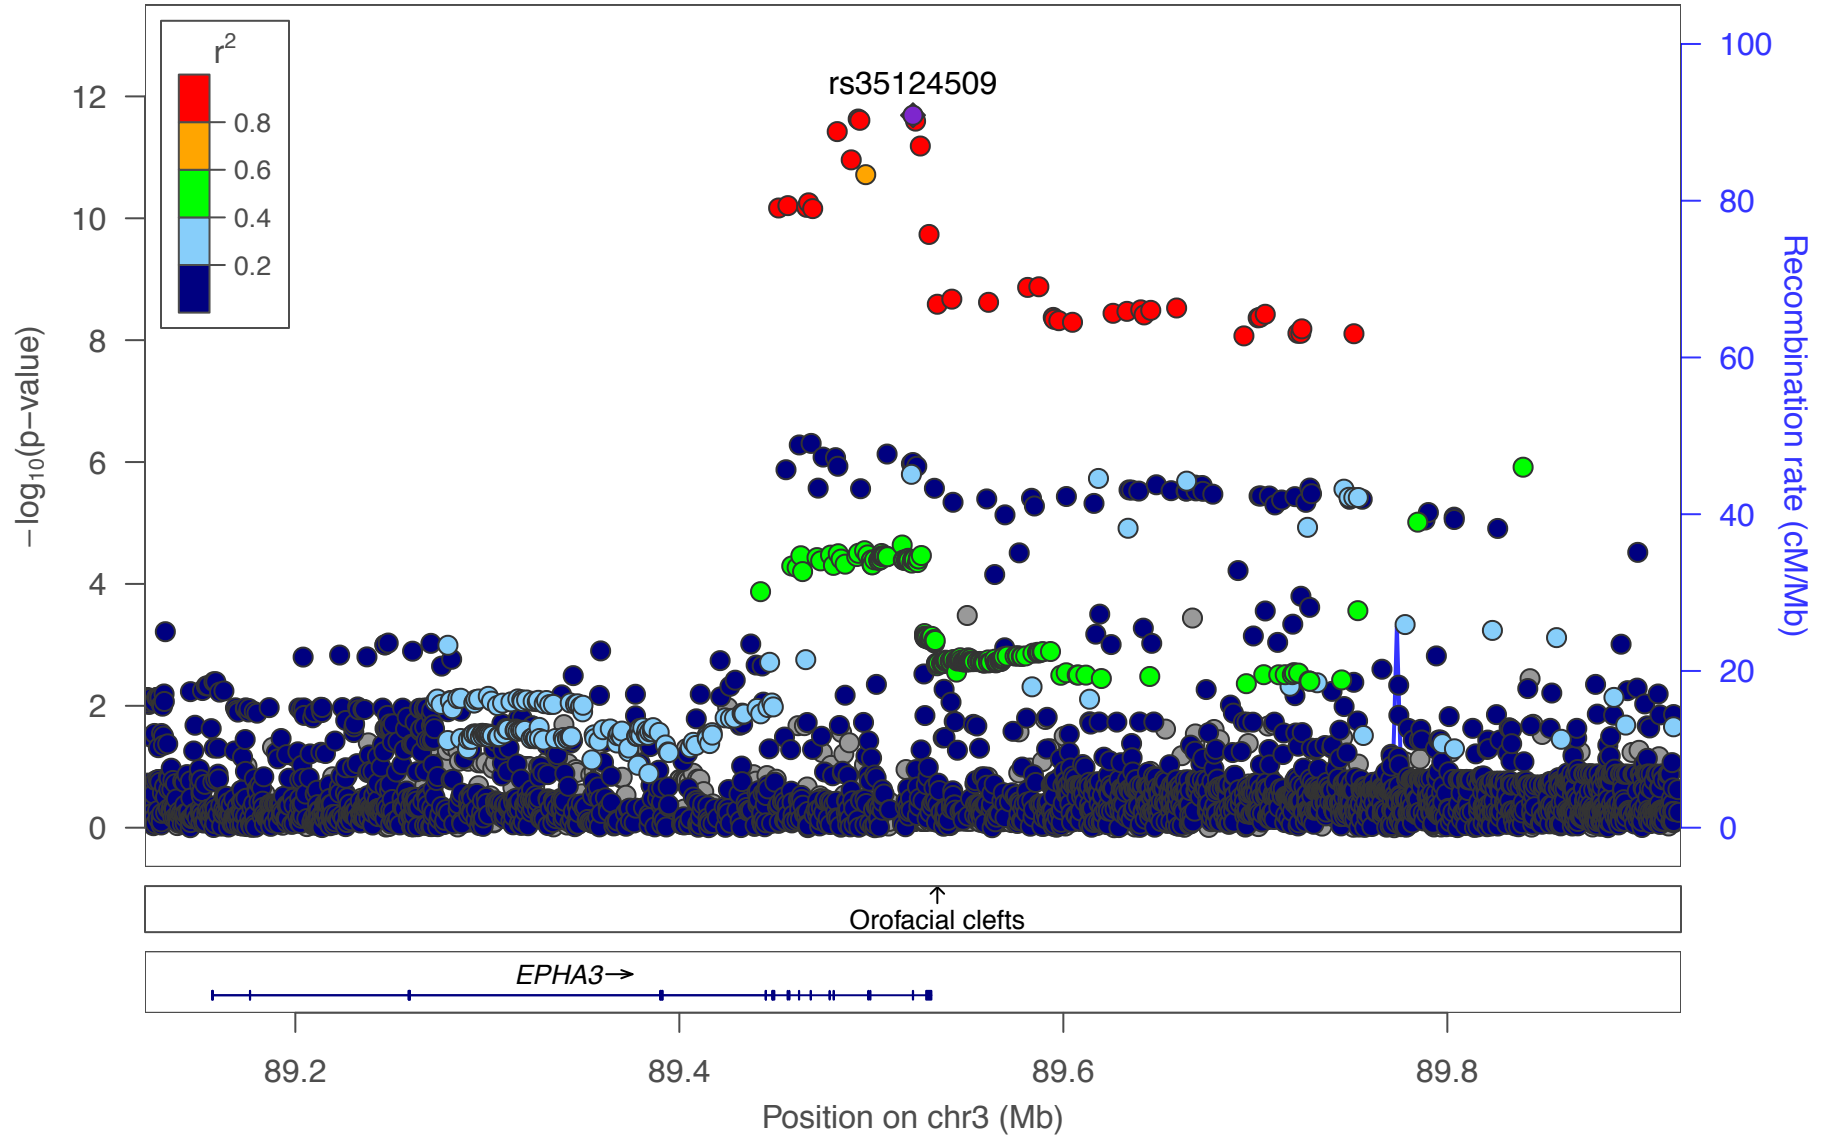



date: Thu Aug 17 17:59:19 2017

build: hg19

display range: chr3:89121693–89921693 [89121693–89921693]

hilite range: 0 – 0 [ 0 – 0 ]

reference SNP: chr3:89521693

number of SNPs plotted: 3517

min P.value: 2.04E–12 [chr3:89521693]

max P.value: 10E–1 [chr3:89562907]

## GWAS Catalog SNPs in Region

| chr | pos (Mb) | trait            | snp       |
|-----|----------|------------------|-----------|
| 3   | 89.53438 | Orofacial clefts | rs7632427 |

# netmat\_edge\_ICA\_003

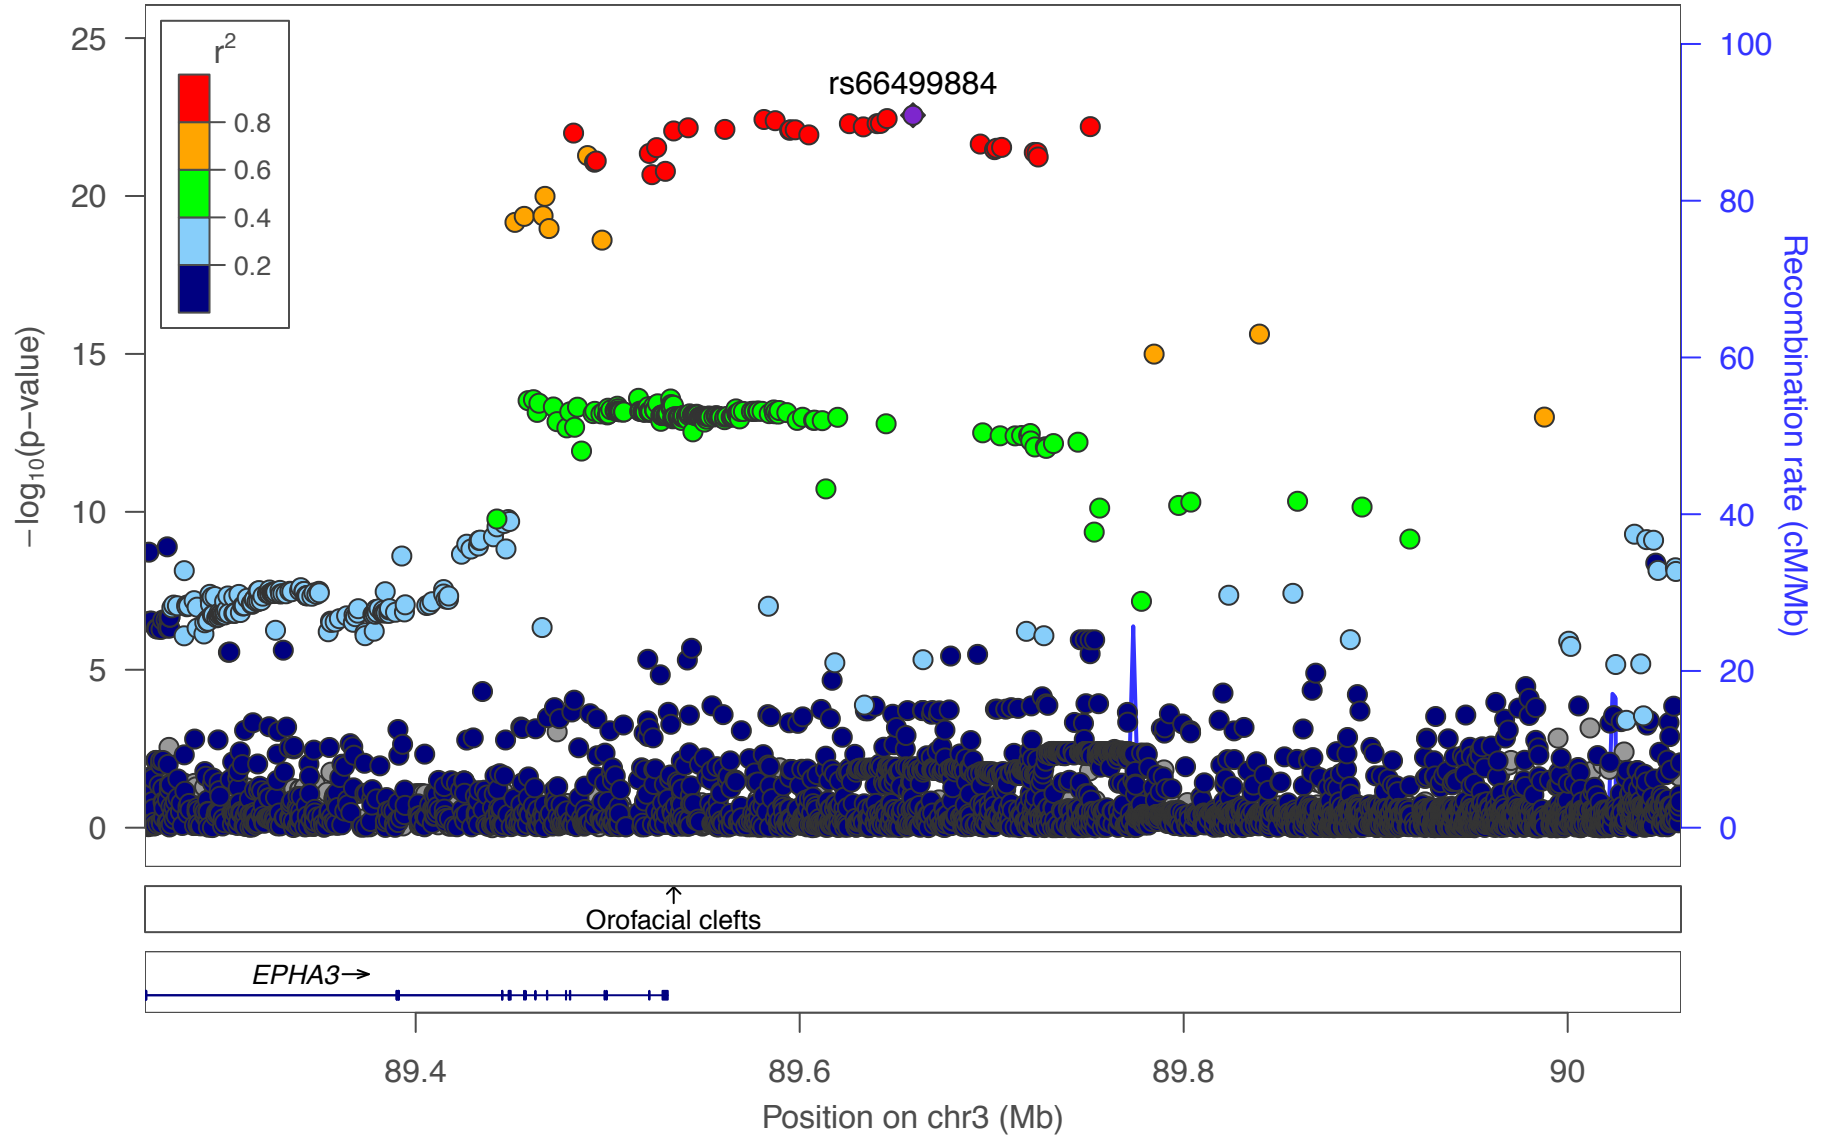

date: Sat Aug 19 17:37:26 2017

build: hg19

display range: chr3:89259012–90059012 [89259012–90059012]

hilite range: 0 – 0 [ 0 – 0 ]

reference SNP: chr3:89659012

number of SNPs plotted: 3873

min P.value: 2.77E–23 [chr3:89659012]

max P.value: 10E–1 [chr3:90006653]

## GWAS Catalog SNPs in Region

| chr | pos (Mb) | trait            | snp       |
|-----|----------|------------------|-----------|
| 3   | 89.53438 | Orofacial clefts | rs7632427 |

# SWI\_T2star\_left\_putamen

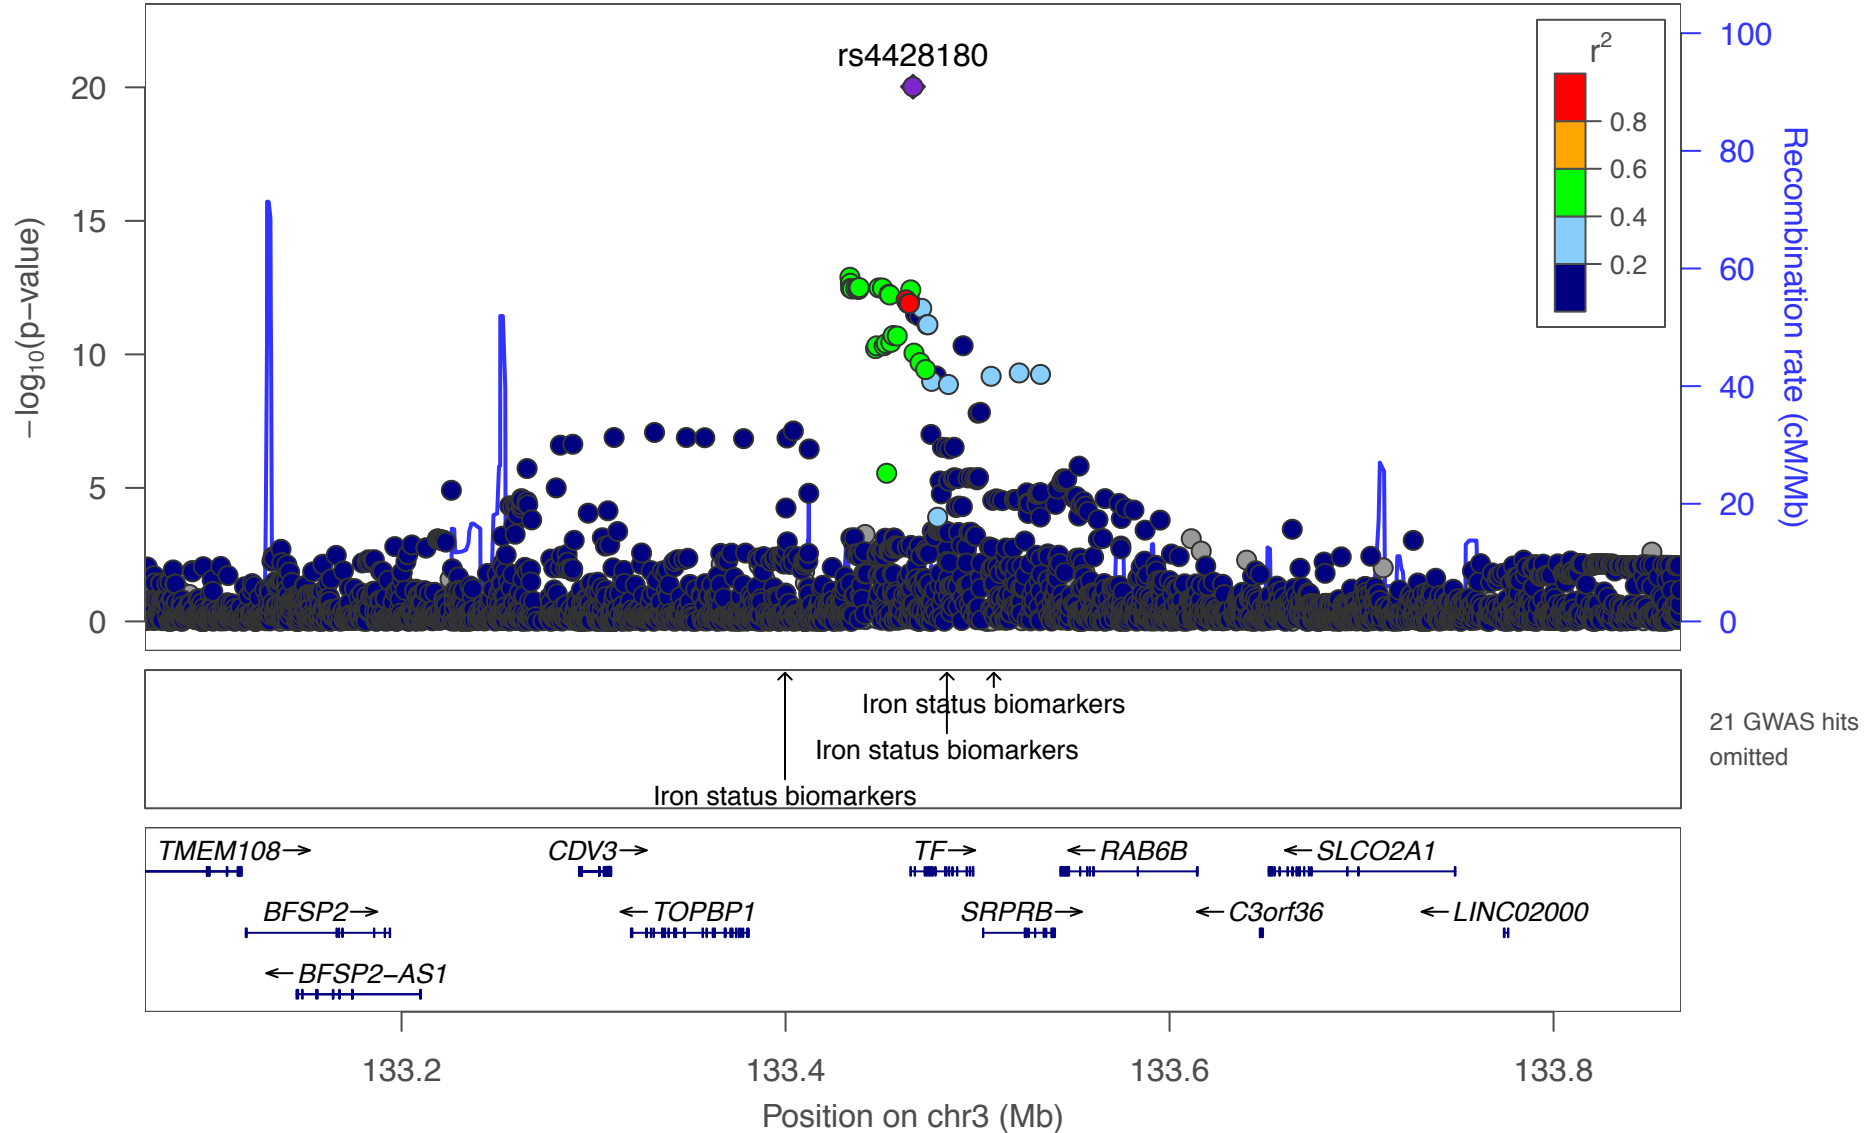

date: Thu Aug 17 18:24:22 2017

build: hg19

display range: chr3:133066374–133866374 [133066374–133866374]

hilite range: 0 – 0 [ 0 – 0 ]

reference SNP: chr3:133466374

number of SNPs plotted: 3859

min P.value: 9.44E–21 [chr3:133466374]

max P.value: 10E–1 [chr3:133574407]

omitted GWAS Hits: NA, NA

GWAS Catalog SNPs in Region

| chr | pos (Mb) | trait                                                                | snp         |
|-----|----------|----------------------------------------------------------------------|-------------|
| 3   | 133.2609 | Bulimia nervosa                                                      | rs11708304  |
| 3   | 133.3997 | Iron status biomarkers                                               | rs2718812   |
| 3   | 133.4106 | Autism spectrum disorder–related traits                              | rs1867503   |
| 3   | 133.4107 | Iron status biomarkers                                               | rs1867504   |
| 3   | 133.4309 | Alzheimer disease and age of onset                                   | rs190500289 |
| 3   | 133.4575 | Iron status biomarkers                                               | rs9872999   |
| 3   | 133.4635 | Iron status biomarkers (transferrin levels)                          | rs8177179   |
| 3   | 133.4757 | Iron status biomarkers                                               | rs1799852   |
| 3   | 133.4757 | Iron status biomarkers (transferrin saturation)                      | rs1799852   |
| 3   | 133.4758 | Alcohol consumption (transferrin glycosylation)                      | rs1799899   |
| 3   | 133.4777 | Iron status biomarkers (transferrin saturation)                      | rs8177240   |
| 3   | 133.4777 | Iron status biomarkers (transferrin levels)                          | rs8177240   |
| 3   | 133.4777 | Iron status biomarkers (iron levels)                                 | rs8177240   |
| 3   | 133.4802 | Iron status biomarkers                                               | rs8177253   |
| 3   | 133.4840 | Iron status biomarkers                                               | rs3811647   |
| 3   | 133.4840 | Hepcidin levels                                                      | rs3811647   |
| 3   | 133.4840 | Alcohol consumption (transferrin glycosylation)                      | rs3811647   |
| 3   | 133.4840 | Hereditary hemochromatosis–related traits (HFE mutation homozygotes) | rs3811647   |
| 3   | 133.4944 | Alcohol consumption (transferrin glycosylation)                      | rs1049296   |
| 3   | 133.5085 | Iron status biomarkers                                               | rs1830084   |
| 3   | 133.5371 | Alcohol consumption (transferrin glycosylation)                      | rs1534166   |



## GWAS Catalog SNPs in Region

| <b>chr</b> | <b>pos (Mb)</b> | <b>trait</b>                                   | <b>snp</b>  |
|------------|-----------------|------------------------------------------------|-------------|
| 3          | 133.5893        | Immune reponse to smallpox (secreted IL-1beta) | rs9835973   |
| 3          | 133.5971        | Post bronchodilator FEV1/FVC ratio             | rs140798517 |
| 3          | 133.6289        | Post bronchodilator FEV1/FVC ratio             | rs143087368 |

# SWI\_T2star\_right\_putamen

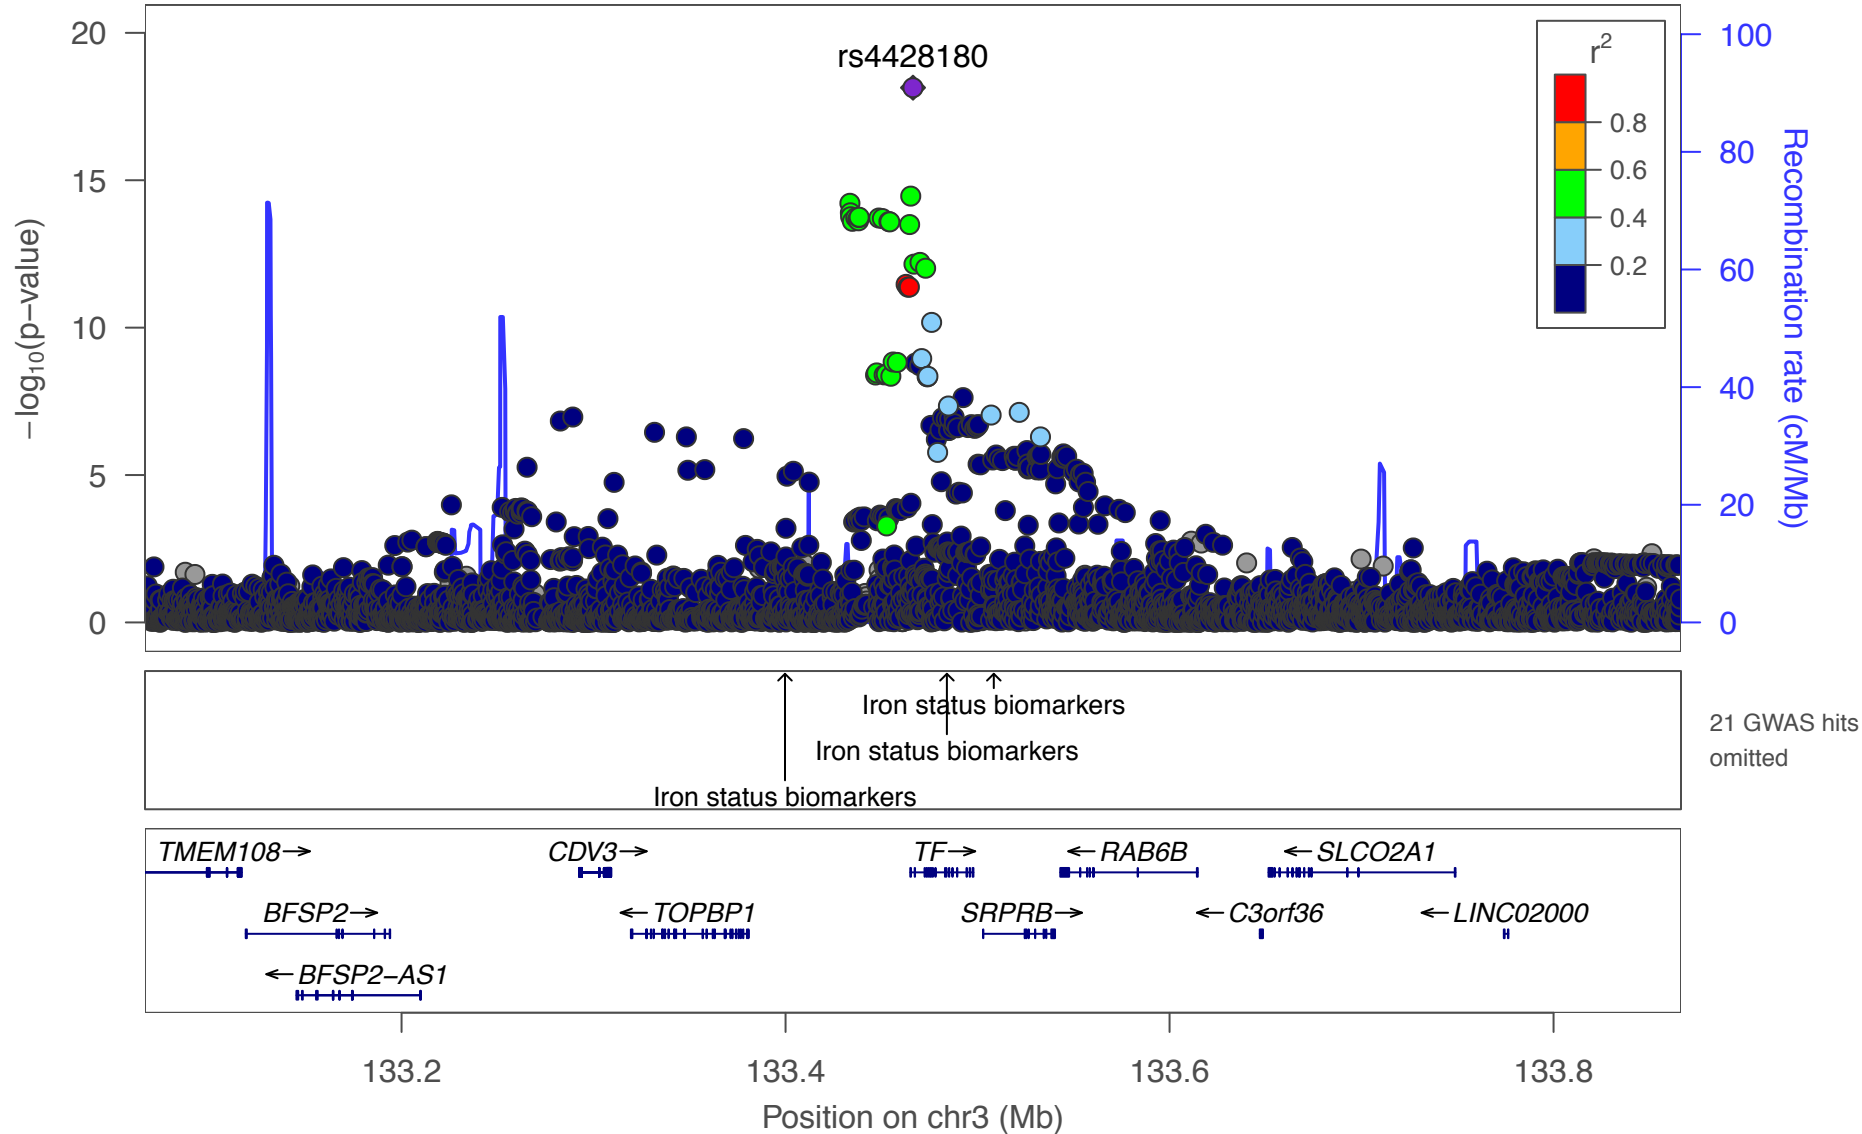

date: Thu Aug 17 18:24:22 2017

build: hg19

display range: chr3:133066374–133866374 [133066374–133866374]

hilite range: 0 – 0 [ 0 – 0 ]

reference SNP: chr3:133466374

number of SNPs plotted: 3859

min P.value: 7.24E–19 [chr3:133466374]

max P.value: 10E–1 [chr3:133178432]

omitted GWAS Hits: NA, NA

GWAS Catalog SNPs in Region

| chr | pos (Mb) | trait                                                                | snp         |
|-----|----------|----------------------------------------------------------------------|-------------|
| 3   | 133.2609 | Bulimia nervosa                                                      | rs11708304  |
| 3   | 133.3997 | Iron status biomarkers                                               | rs2718812   |
| 3   | 133.4106 | Autism spectrum disorder–related traits                              | rs1867503   |
| 3   | 133.4107 | Iron status biomarkers                                               | rs1867504   |
| 3   | 133.4309 | Alzheimer disease and age of onset                                   | rs190500289 |
| 3   | 133.4575 | Iron status biomarkers                                               | rs9872999   |
| 3   | 133.4635 | Iron status biomarkers (transferrin levels)                          | rs8177179   |
| 3   | 133.4757 | Iron status biomarkers                                               | rs1799852   |
| 3   | 133.4757 | Iron status biomarkers (transferrin saturation)                      | rs1799852   |
| 3   | 133.4758 | Alcohol consumption (transferrin glycosylation)                      | rs1799899   |
| 3   | 133.4777 | Iron status biomarkers (transferrin saturation)                      | rs8177240   |
| 3   | 133.4777 | Iron status biomarkers (transferrin levels)                          | rs8177240   |
| 3   | 133.4777 | Iron status biomarkers (iron levels)                                 | rs8177240   |
| 3   | 133.4802 | Iron status biomarkers                                               | rs8177253   |
| 3   | 133.4840 | Iron status biomarkers                                               | rs3811647   |
| 3   | 133.4840 | Hepcidin levels                                                      | rs3811647   |
| 3   | 133.4840 | Alcohol consumption (transferrin glycosylation)                      | rs3811647   |
| 3   | 133.4840 | Hereditary hemochromatosis–related traits (HFE mutation homozygotes) | rs3811647   |
| 3   | 133.4944 | Alcohol consumption (transferrin glycosylation)                      | rs1049296   |
| 3   | 133.5085 | Iron status biomarkers                                               | rs1830084   |
| 3   | 133.5371 | Alcohol consumption (transferrin glycosylation)                      | rs1534166   |

## GWAS Catalog SNPs in Region

| <b>chr</b> | <b>pos (Mb)</b> | <b>trait</b>                                   | <b>snp</b>  |
|------------|-----------------|------------------------------------------------|-------------|
| 3          | 133.5893        | Immune reponse to smallpox (secreted IL-1beta) | rs9835973   |
| 3          | 133.5971        | Post bronchodilator FEV1/FVC ratio             | rs140798517 |
| 3          | 133.6289        | Post bronchodilator FEV1/FVC ratio             | rs143087368 |

# SWI\_T2star\_left\_pallidum

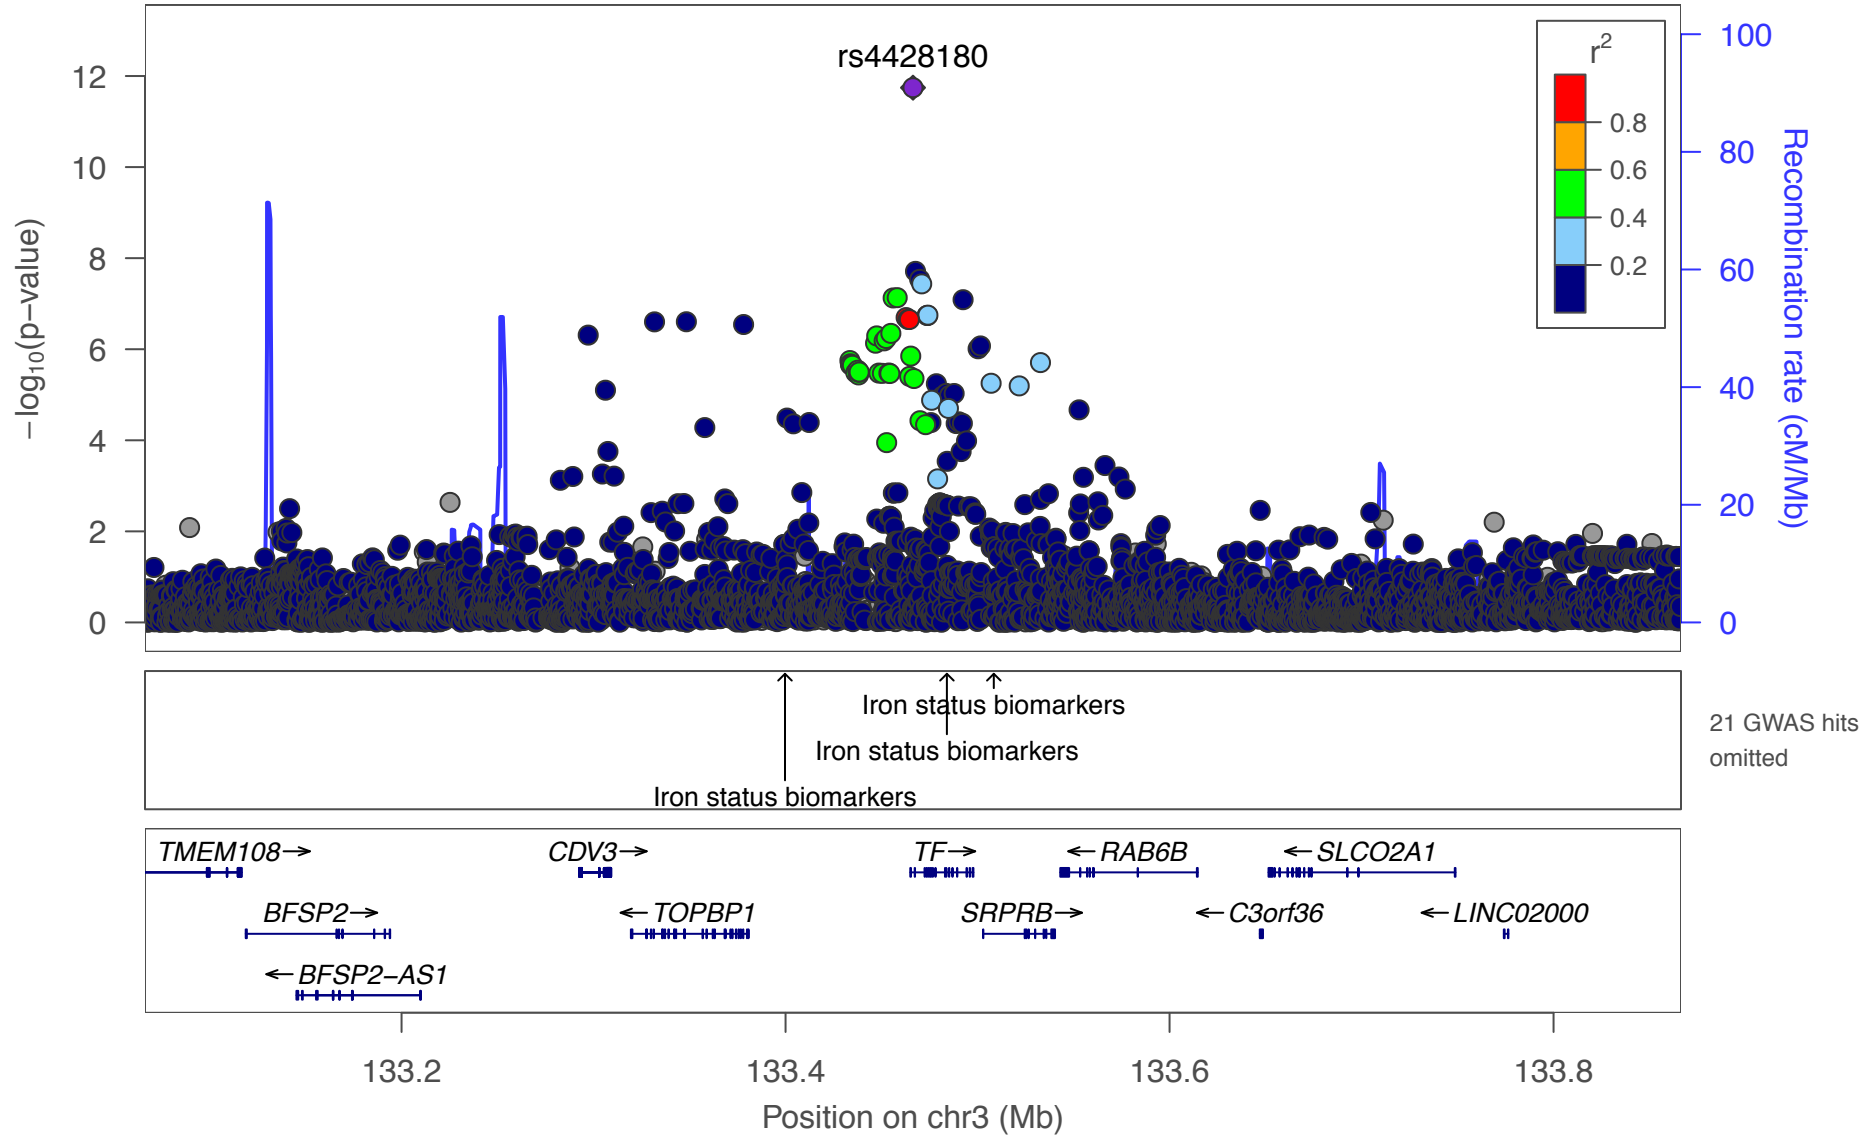

date: Thu Aug 17 18:24:22 2017

build: hg19

display range: chr3:133066374–133866374 [133066374–133866374]

hilite range: 0 – 0 [ 0 – 0 ]

reference SNP: chr3:133466374

number of SNPs plotted: 3859

min P.value: 1.8E–12 [chr3:133466374]

max P.value: 9.99E–1 [chr3:133593610]

omitted GWAS Hits: NA, NA

GWAS Catalog SNPs in Region

| chr | pos (Mb) | trait                                                                | snp         |
|-----|----------|----------------------------------------------------------------------|-------------|
| 3   | 133.2609 | Bulimia nervosa                                                      | rs11708304  |
| 3   | 133.3997 | Iron status biomarkers                                               | rs2718812   |
| 3   | 133.4106 | Autism spectrum disorder–related traits                              | rs1867503   |
| 3   | 133.4107 | Iron status biomarkers                                               | rs1867504   |
| 3   | 133.4309 | Alzheimer disease and age of onset                                   | rs190500289 |
| 3   | 133.4575 | Iron status biomarkers                                               | rs9872999   |
| 3   | 133.4635 | Iron status biomarkers (transferrin levels)                          | rs8177179   |
| 3   | 133.4757 | Iron status biomarkers                                               | rs1799852   |
| 3   | 133.4757 | Iron status biomarkers (transferrin saturation)                      | rs1799852   |
| 3   | 133.4758 | Alcohol consumption (transferrin glycosylation)                      | rs1799899   |
| 3   | 133.4777 | Iron status biomarkers (transferrin saturation)                      | rs8177240   |
| 3   | 133.4777 | Iron status biomarkers (transferrin levels)                          | rs8177240   |
| 3   | 133.4777 | Iron status biomarkers (iron levels)                                 | rs8177240   |
| 3   | 133.4802 | Iron status biomarkers                                               | rs8177253   |
| 3   | 133.4840 | Iron status biomarkers                                               | rs3811647   |
| 3   | 133.4840 | Hepcidin levels                                                      | rs3811647   |
| 3   | 133.4840 | Alcohol consumption (transferrin glycosylation)                      | rs3811647   |
| 3   | 133.4840 | Hereditary hemochromatosis–related traits (HFE mutation homozygotes) | rs3811647   |
| 3   | 133.4944 | Alcohol consumption (transferrin glycosylation)                      | rs1049296   |
| 3   | 133.5085 | Iron status biomarkers                                               | rs1830084   |
| 3   | 133.5371 | Alcohol consumption (transferrin glycosylation)                      | rs1534166   |



## GWAS Catalog SNPs in Region

| <b>chr</b> | <b>pos (Mb)</b> | <b>trait</b>                                   | <b>snp</b>  |
|------------|-----------------|------------------------------------------------|-------------|
| 3          | 133.5893        | Immune reponse to smallpox (secreted IL-1beta) | rs9835973   |
| 3          | 133.5971        | Post bronchodilator FEV1/FVC ratio             | rs140798517 |
| 3          | 133.6289        | Post bronchodilator FEV1/FVC ratio             | rs143087368 |

# SWI\_T2star\_right\_pallidum

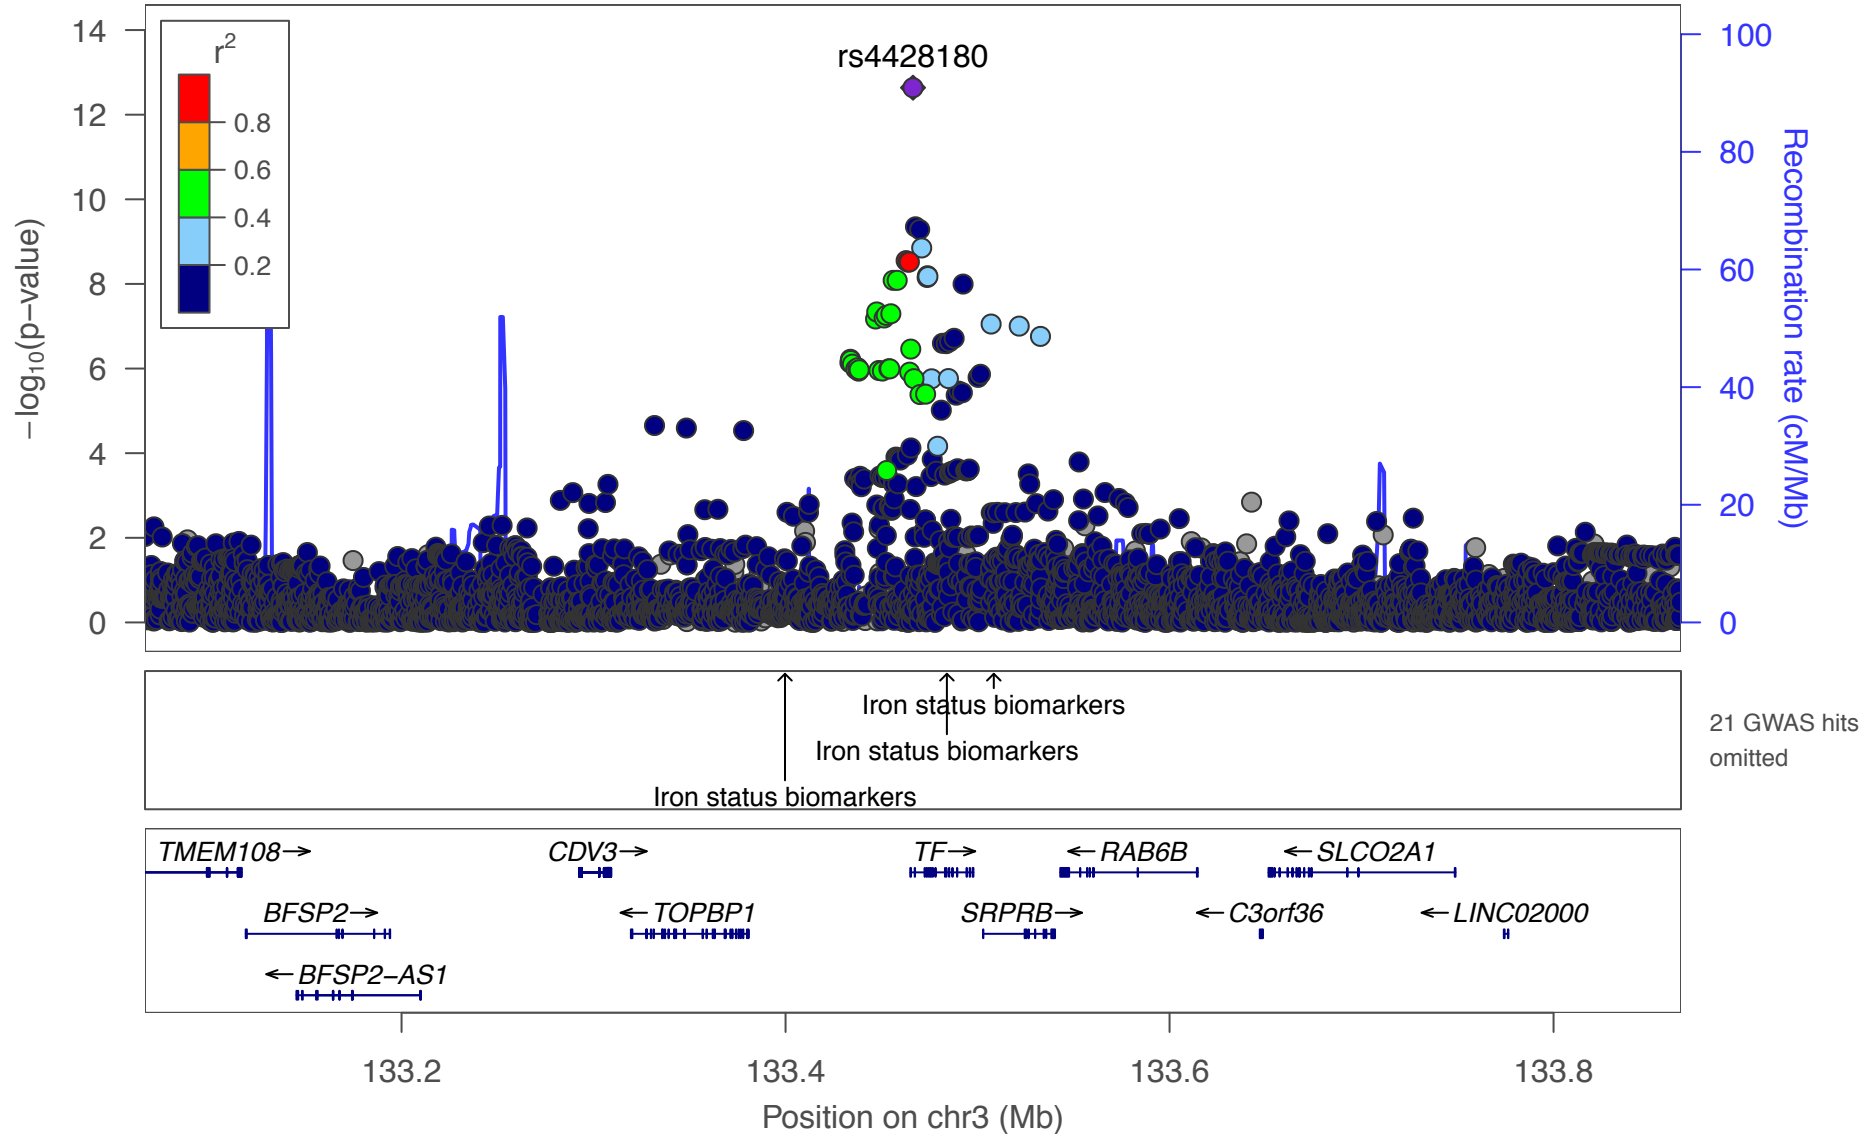

date: Thu Aug 17 18:24:22 2017

build: hg19

display range: chr3:133066374–133866374 [133066374–133866374]

hilite range: 0 – 0 [ 0 – 0 ]

reference SNP: chr3:133466374

number of SNPs plotted: 3859

min P.value: 2.3E–13 [chr3:133466374]

max P.value: 10E–1 [chr3:133463823]

omitted GWAS Hits: NA, NA

GWAS Catalog SNPs in Region

| chr | pos (Mb) | trait                                                                | snp         |
|-----|----------|----------------------------------------------------------------------|-------------|
| 3   | 133.2609 | Bulimia nervosa                                                      | rs11708304  |
| 3   | 133.3997 | Iron status biomarkers                                               | rs2718812   |
| 3   | 133.4106 | Autism spectrum disorder–related traits                              | rs1867503   |
| 3   | 133.4107 | Iron status biomarkers                                               | rs1867504   |
| 3   | 133.4309 | Alzheimer disease and age of onset                                   | rs190500289 |
| 3   | 133.4575 | Iron status biomarkers                                               | rs9872999   |
| 3   | 133.4635 | Iron status biomarkers (transferrin levels)                          | rs8177179   |
| 3   | 133.4757 | Iron status biomarkers                                               | rs1799852   |
| 3   | 133.4757 | Iron status biomarkers (transferrin saturation)                      | rs1799852   |
| 3   | 133.4758 | Alcohol consumption (transferrin glycosylation)                      | rs1799899   |
| 3   | 133.4777 | Iron status biomarkers (transferrin saturation)                      | rs8177240   |
| 3   | 133.4777 | Iron status biomarkers (transferrin levels)                          | rs8177240   |
| 3   | 133.4777 | Iron status biomarkers (iron levels)                                 | rs8177240   |
| 3   | 133.4802 | Iron status biomarkers                                               | rs8177253   |
| 3   | 133.4840 | Iron status biomarkers                                               | rs3811647   |
| 3   | 133.4840 | Hepcidin levels                                                      | rs3811647   |
| 3   | 133.4840 | Alcohol consumption (transferrin glycosylation)                      | rs3811647   |
| 3   | 133.4840 | Hereditary hemochromatosis–related traits (HFE mutation homozygotes) | rs3811647   |
| 3   | 133.4944 | Alcohol consumption (transferrin glycosylation)                      | rs1049296   |
| 3   | 133.5085 | Iron status biomarkers                                               | rs1830084   |
| 3   | 133.5371 | Alcohol consumption (transferrin glycosylation)                      | rs1534166   |

## GWAS Catalog SNPs in Region

| <b>chr</b> | <b>pos (Mb)</b> | <b>trait</b>                                   | <b>snp</b>  |
|------------|-----------------|------------------------------------------------|-------------|
| 3          | 133.5893        | Immune reponse to smallpox (secreted IL-1beta) | rs9835973   |
| 3          | 133.5971        | Post bronchodilator FEV1/FVC ratio             | rs140798517 |
| 3          | 133.6289        | Post bronchodilator FEV1/FVC ratio             | rs143087368 |

# SWI\_T2star\_left\_putamen\_plus\_right\_putamen

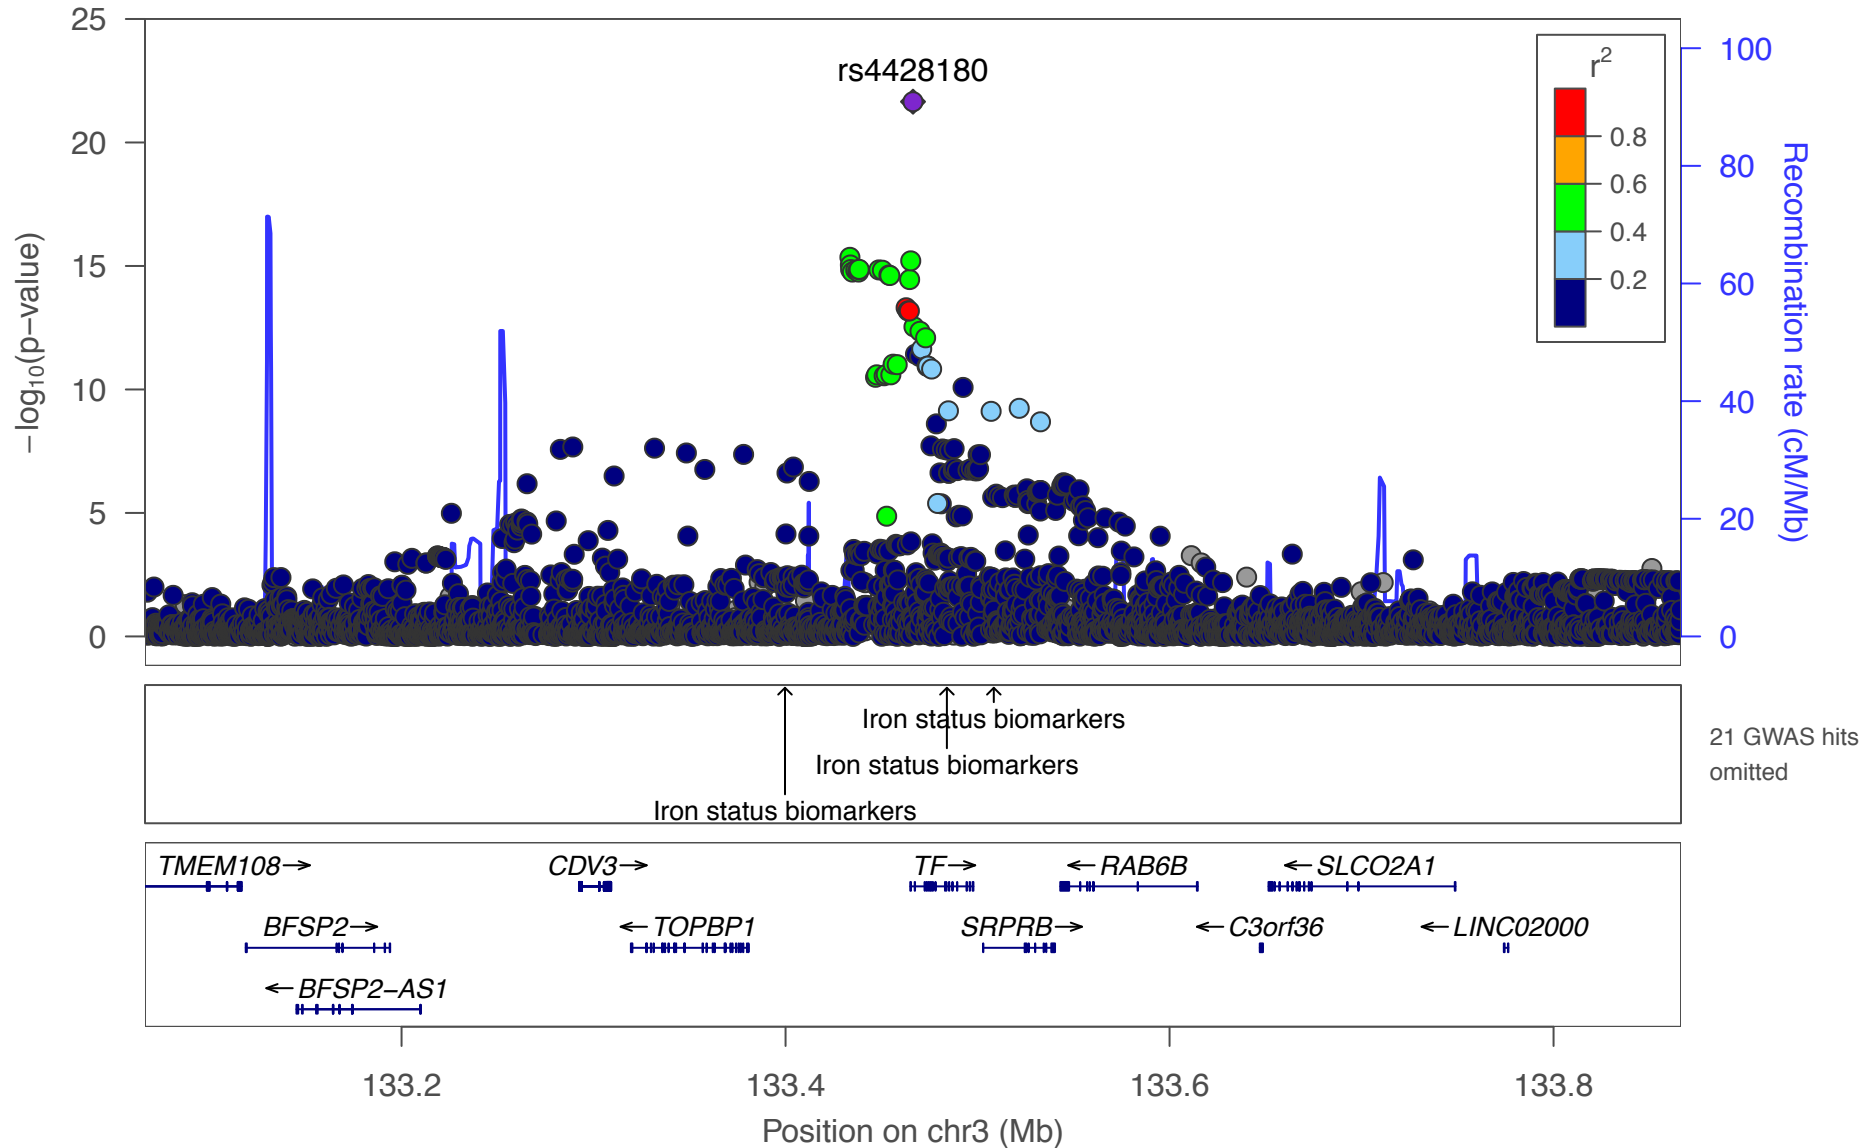

date: Thu Aug 17 18:24:22 2017

build: hg19

display range: chr3:133066374–133866374 [133066374–133866374]

hilite range: 0 – 0 [ 0 – 0 ]

reference SNP: chr3:133466374

number of SNPs plotted: 3859

min P.value: 2.23E–22 [chr3:133466374]

max P.value: 10E–1 [chr3:133297659]

omitted GWAS Hits: NA, NA

GWAS Catalog SNPs in Region

| chr | pos (Mb) | trait                                                                | snp         |
|-----|----------|----------------------------------------------------------------------|-------------|
| 3   | 133.2609 | Bulimia nervosa                                                      | rs11708304  |
| 3   | 133.3997 | Iron status biomarkers                                               | rs2718812   |
| 3   | 133.4106 | Autism spectrum disorder–related traits                              | rs1867503   |
| 3   | 133.4107 | Iron status biomarkers                                               | rs1867504   |
| 3   | 133.4309 | Alzheimer disease and age of onset                                   | rs190500289 |
| 3   | 133.4575 | Iron status biomarkers                                               | rs9872999   |
| 3   | 133.4635 | Iron status biomarkers (transferrin levels)                          | rs8177179   |
| 3   | 133.4757 | Iron status biomarkers                                               | rs1799852   |
| 3   | 133.4757 | Iron status biomarkers (transferrin saturation)                      | rs1799852   |
| 3   | 133.4758 | Alcohol consumption (transferrin glycosylation)                      | rs1799899   |
| 3   | 133.4777 | Iron status biomarkers (transferrin saturation)                      | rs8177240   |
| 3   | 133.4777 | Iron status biomarkers (transferrin levels)                          | rs8177240   |
| 3   | 133.4777 | Iron status biomarkers (iron levels)                                 | rs8177240   |
| 3   | 133.4802 | Iron status biomarkers                                               | rs8177253   |
| 3   | 133.4840 | Iron status biomarkers                                               | rs3811647   |
| 3   | 133.4840 | Hepcidin levels                                                      | rs3811647   |
| 3   | 133.4840 | Alcohol consumption (transferrin glycosylation)                      | rs3811647   |
| 3   | 133.4840 | Hereditary hemochromatosis–related traits (HFE mutation homozygotes) | rs3811647   |
| 3   | 133.4944 | Alcohol consumption (transferrin glycosylation)                      | rs1049296   |
| 3   | 133.5085 | Iron status biomarkers                                               | rs1830084   |
| 3   | 133.5371 | Alcohol consumption (transferrin glycosylation)                      | rs1534166   |



## GWAS Catalog SNPs in Region

| <b>chr</b> | <b>pos (Mb)</b> | <b>trait</b>                                   | <b>snp</b>  |
|------------|-----------------|------------------------------------------------|-------------|
| 3          | 133.5893        | Immune reponse to smallpox (secreted IL-1beta) | rs9835973   |
| 3          | 133.5971        | Post bronchodilator FEV1/FVC ratio             | rs140798517 |
| 3          | 133.6289        | Post bronchodilator FEV1/FVC ratio             | rs143087368 |

# SWI\_T2star\_left\_pallidum\_plus\_right\_pallidum

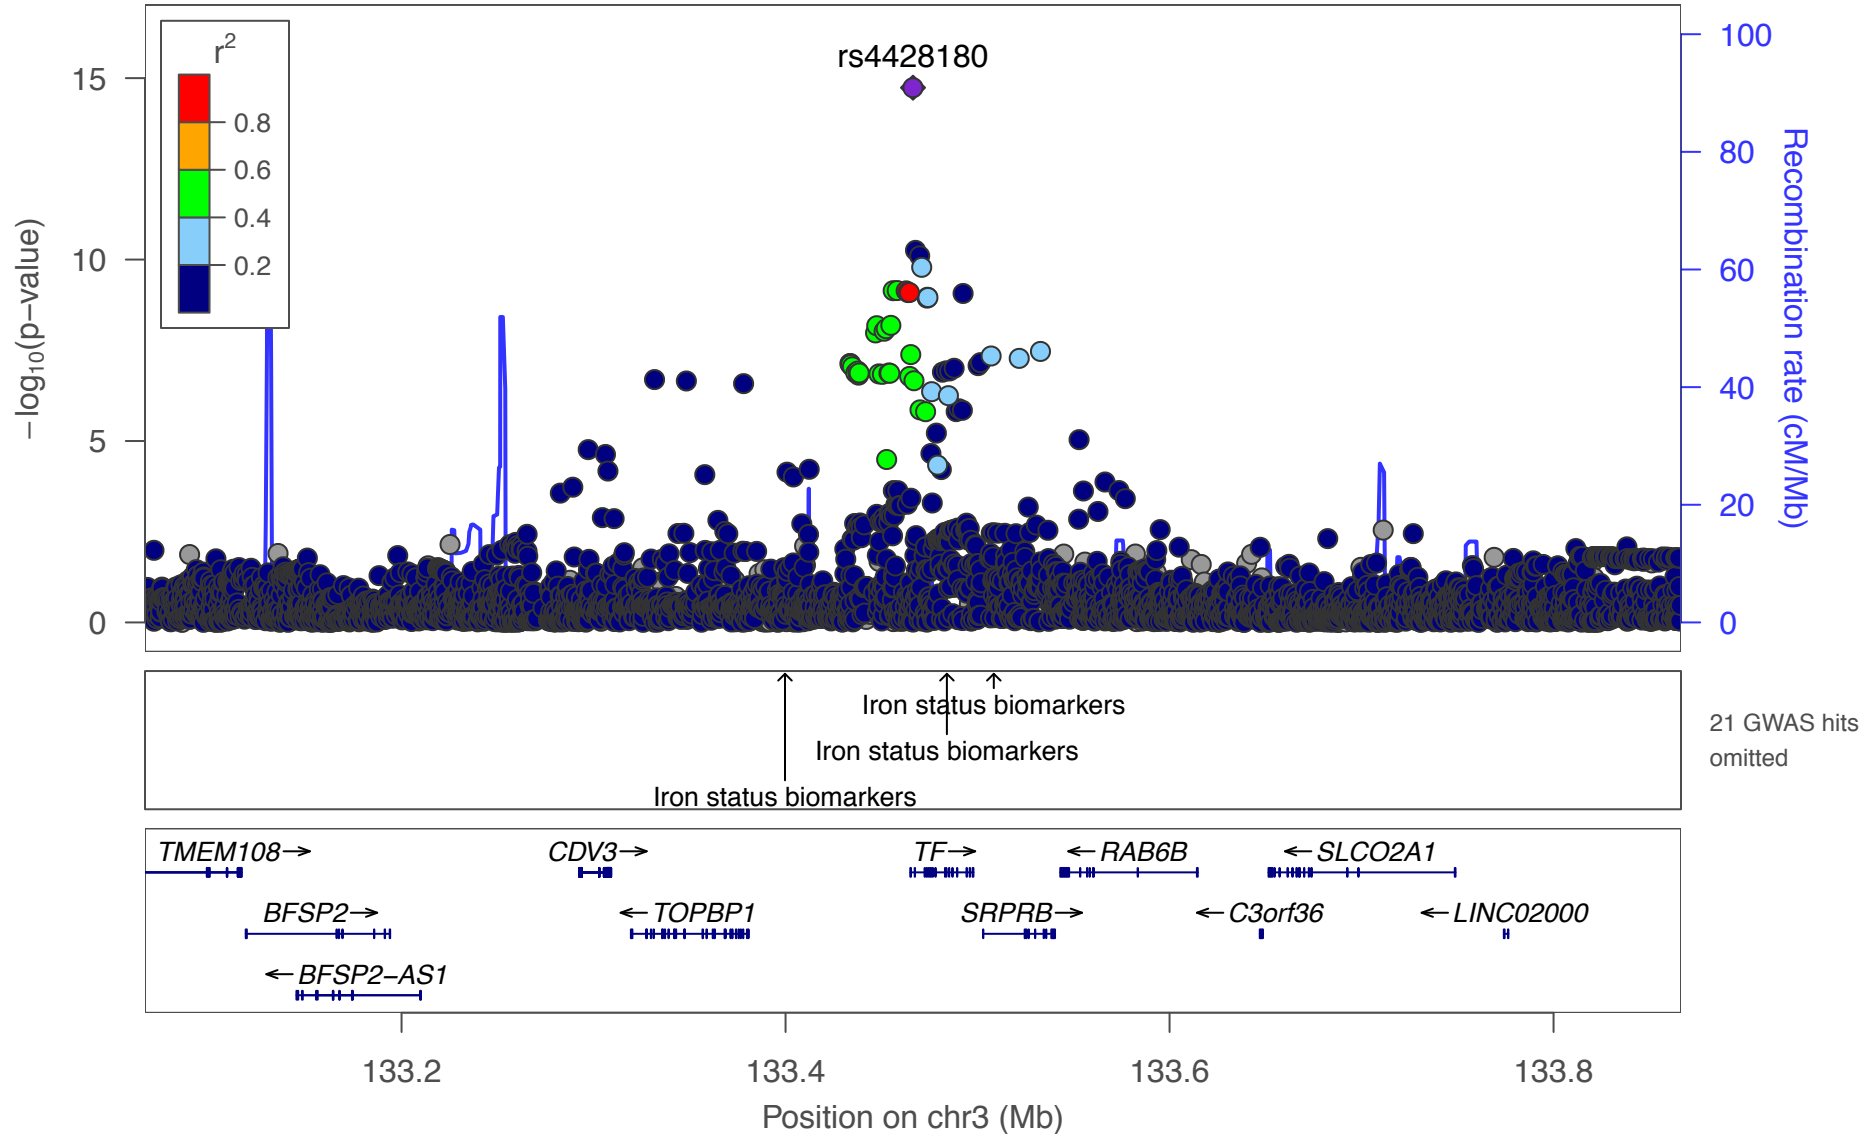

date: Thu Aug 17 18:24:22 2017

build: hg19

display range: chr3:133066374–133866374 [133066374–133866374]

hilite range: 0 – 0 [ 0 – 0 ]

reference SNP: chr3:133466374

number of SNPs plotted: 3859

min P.value: 1.83E–15 [chr3:133466374]

max P.value: 9.99E–1 [chr3:133253919]

omitted GWAS Hits: NA, NA

GWAS Catalog SNPs in Region

| chr | pos (Mb) | trait                                                                | snp         |
|-----|----------|----------------------------------------------------------------------|-------------|
| 3   | 133.2609 | Bulimia nervosa                                                      | rs11708304  |
| 3   | 133.3997 | Iron status biomarkers                                               | rs2718812   |
| 3   | 133.4106 | Autism spectrum disorder–related traits                              | rs1867503   |
| 3   | 133.4107 | Iron status biomarkers                                               | rs1867504   |
| 3   | 133.4309 | Alzheimer disease and age of onset                                   | rs190500289 |
| 3   | 133.4575 | Iron status biomarkers                                               | rs9872999   |
| 3   | 133.4635 | Iron status biomarkers (transferrin levels)                          | rs8177179   |
| 3   | 133.4757 | Iron status biomarkers                                               | rs1799852   |
| 3   | 133.4757 | Iron status biomarkers (transferrin saturation)                      | rs1799852   |
| 3   | 133.4758 | Alcohol consumption (transferrin glycosylation)                      | rs1799899   |
| 3   | 133.4777 | Iron status biomarkers (transferrin saturation)                      | rs8177240   |
| 3   | 133.4777 | Iron status biomarkers (transferrin levels)                          | rs8177240   |
| 3   | 133.4777 | Iron status biomarkers (iron levels)                                 | rs8177240   |
| 3   | 133.4802 | Iron status biomarkers                                               | rs8177253   |
| 3   | 133.4840 | Iron status biomarkers                                               | rs3811647   |
| 3   | 133.4840 | Hepcidin levels                                                      | rs3811647   |
| 3   | 133.4840 | Alcohol consumption (transferrin glycosylation)                      | rs3811647   |
| 3   | 133.4840 | Hereditary hemochromatosis–related traits (HFE mutation homozygotes) | rs3811647   |
| 3   | 133.4944 | Alcohol consumption (transferrin glycosylation)                      | rs1049296   |
| 3   | 133.5085 | Iron status biomarkers                                               | rs1830084   |
| 3   | 133.5371 | Alcohol consumption (transferrin glycosylation)                      | rs1534166   |

## GWAS Catalog SNPs in Region

| <b>chr</b> | <b>pos (Mb)</b> | <b>trait</b>                                   | <b>snp</b>  |
|------------|-----------------|------------------------------------------------|-------------|
| 3          | 133.5893        | Immune reponse to smallpox (secreted IL-1beta) | rs9835973   |
| 3          | 133.5971        | Post bronchodilator FEV1/FVC ratio             | rs140798517 |
| 3          | 133.6289        | Post bronchodilator FEV1/FVC ratio             | rs143087368 |

# netmat\_edge\_ICA\_002

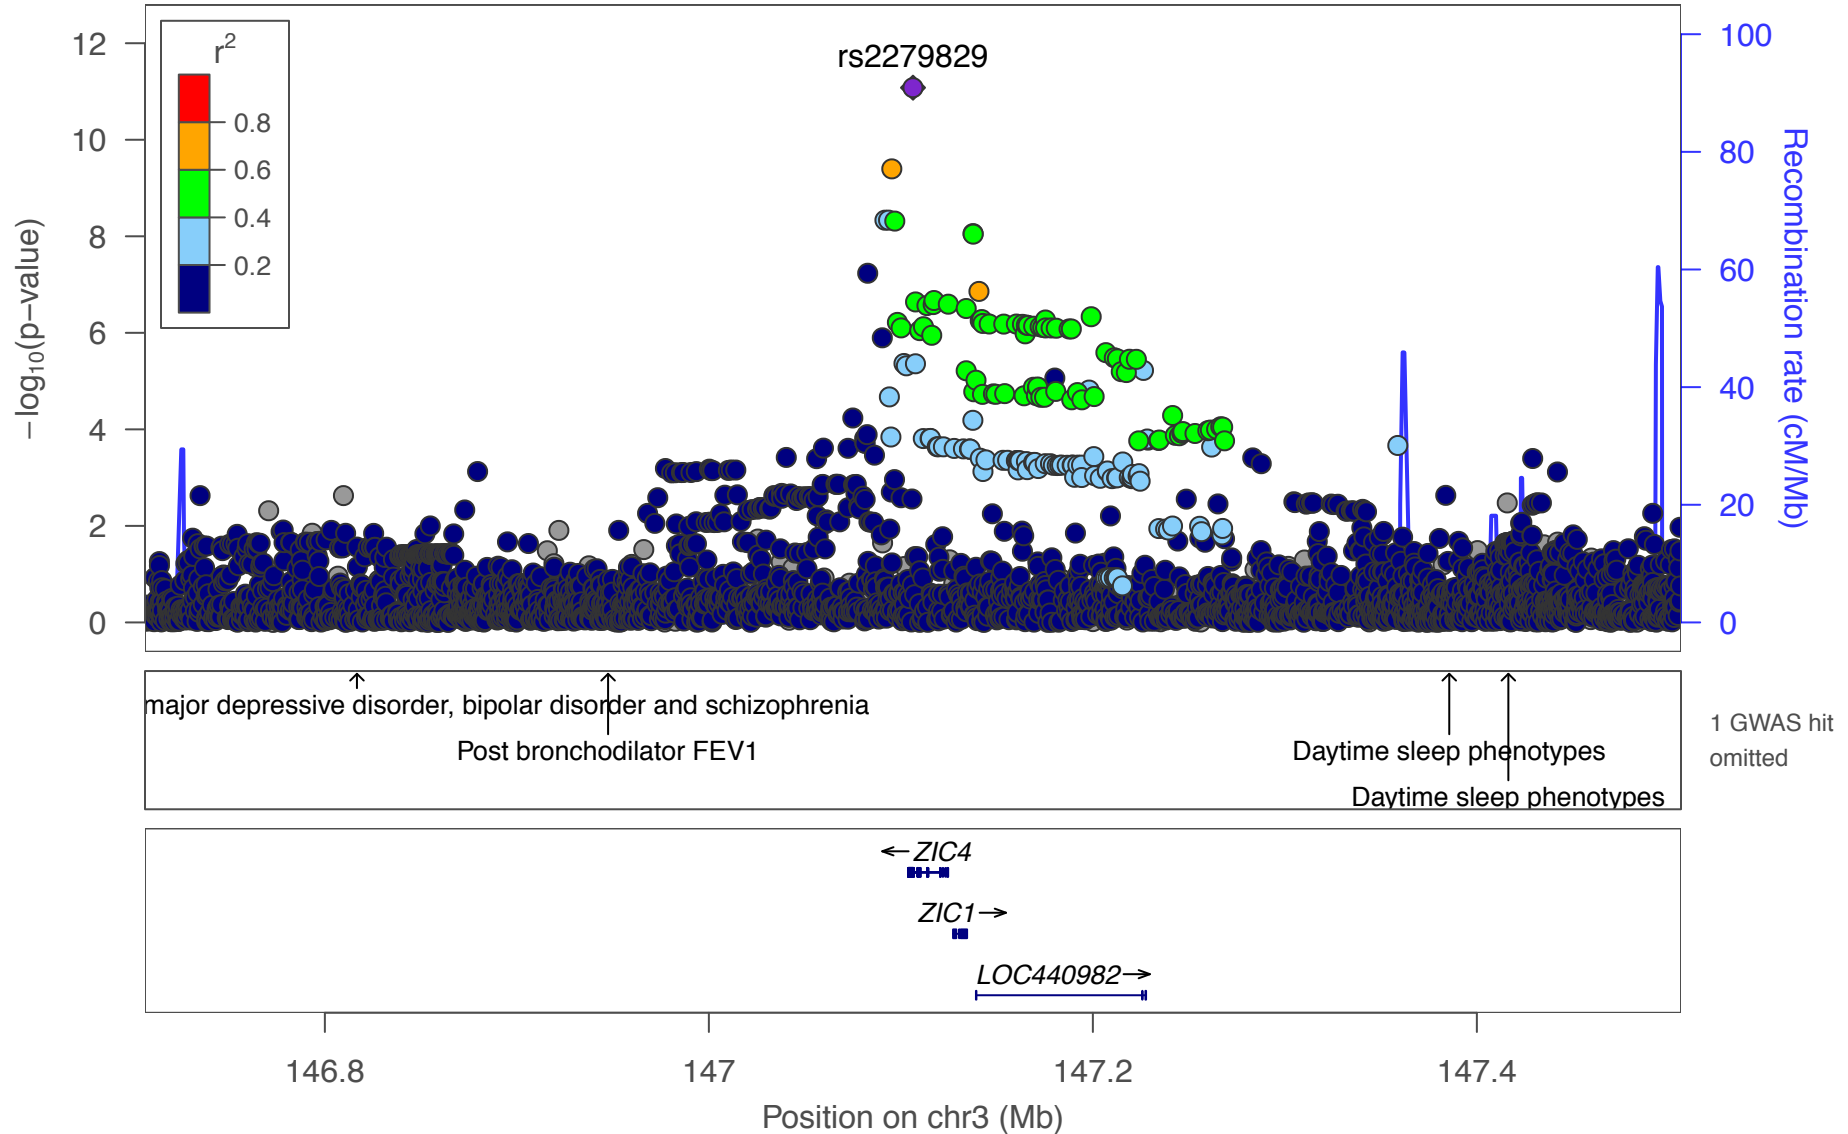

date: Sat Aug 19 17:32:05 2017

build: hg19

display range: chr3:146706319–147506319 [146706319–147506319]

hilite range: 0 – 0 [ 0 – 0 ]

reference SNP: chr3:147106319

number of SNPs plotted: 3210

min P.value: 8.34E–12 [chr3:147106319]

max P.value: 9.99E–1 [chr3:147143227]

omitted GWAS Hits: NA

## GWAS Catalog SNPs in Region

| <b>chr</b> | <b>pos (Mb)</b> | <b>trait</b>                                                                           | <b>snp</b>  |
|------------|-----------------|----------------------------------------------------------------------------------------|-------------|
| 3          | 146.8167        | Functional impairment in major depressive disorder, bipolar disorder and schizophrenia | rs4681346   |
| 3          | 146.9291        | Adult asthma                                                                           | rs78558203  |
| 3          | 146.9475        | Post bronchodilator FEV1                                                               | rs189504960 |
| 3          | 147.3856        | Daytime sleep phenotypes                                                               | rs2319326   |
| 3          | 147.4164        | Daytime sleep phenotypes                                                               | rs73151930  |



# TBSS\_FA\_Superior\_cerebellar\_peduncle\_R

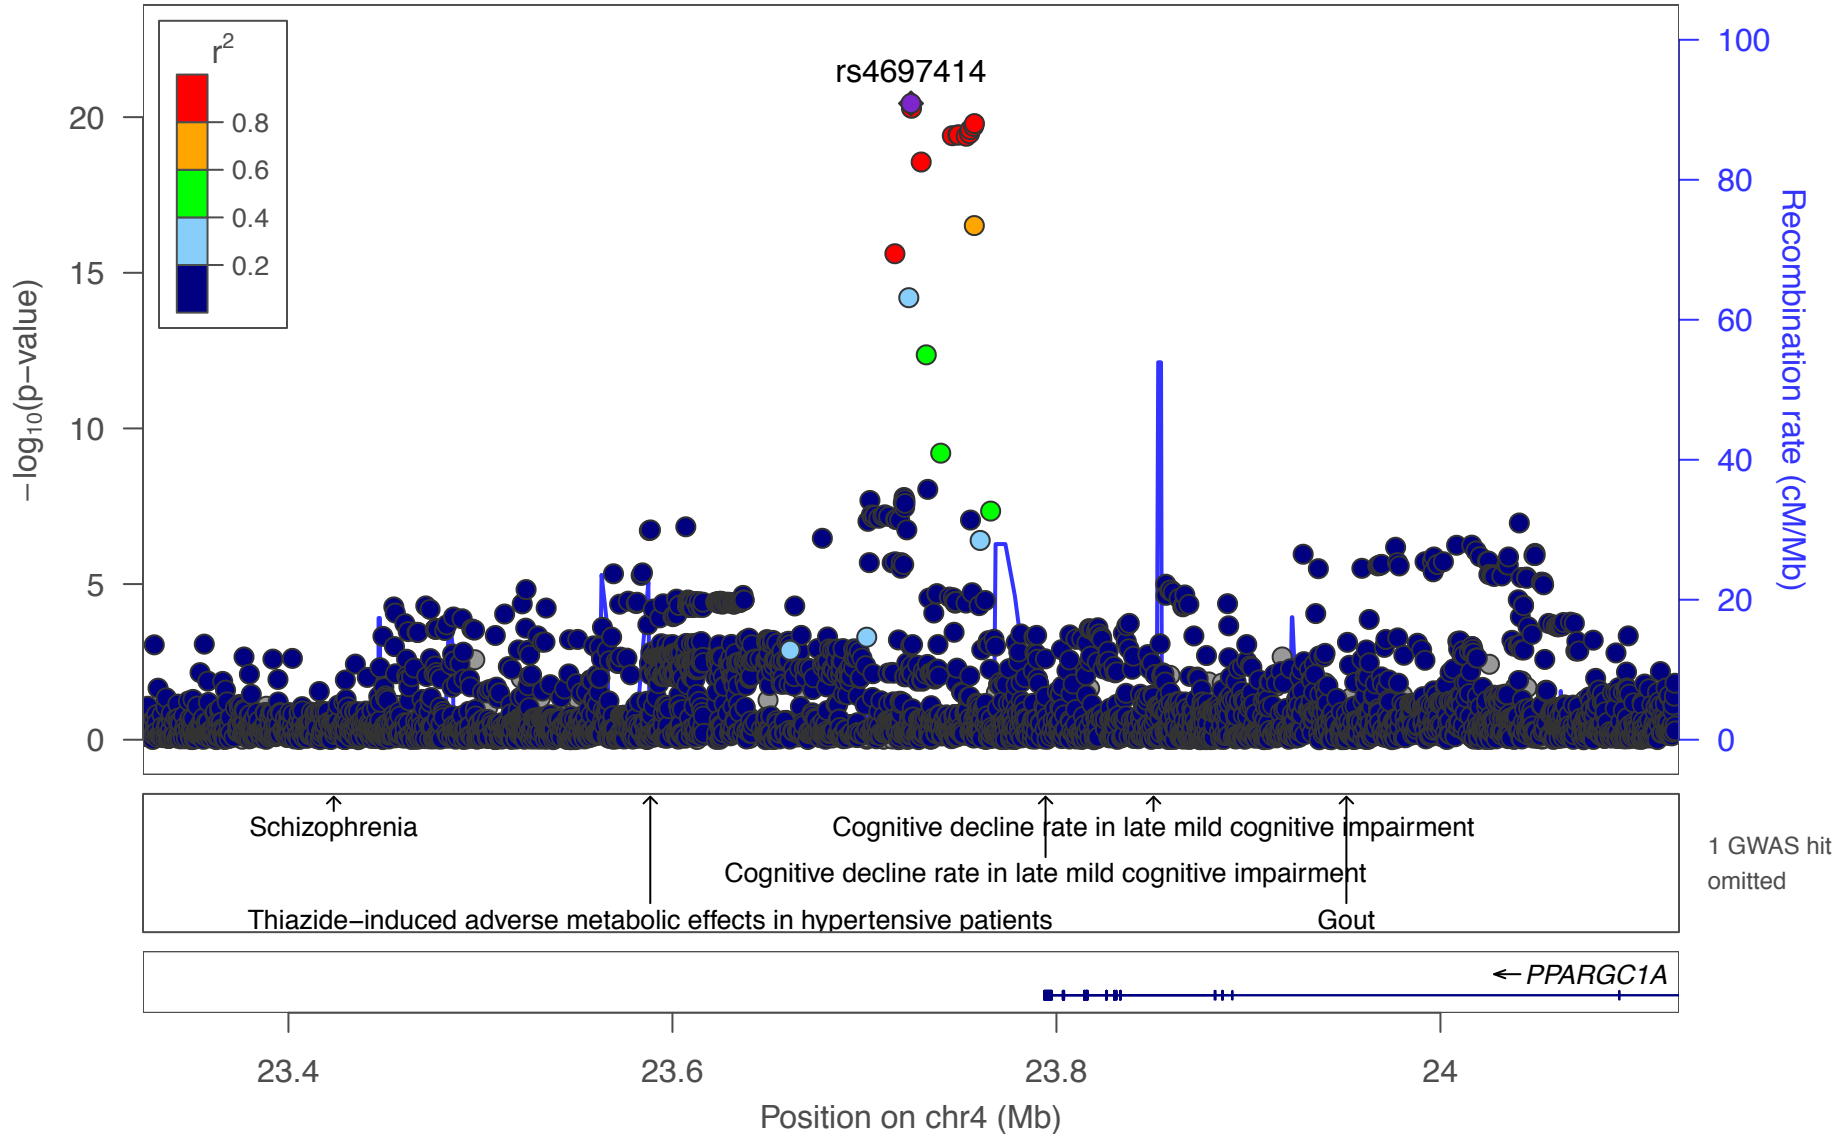

date: Thu Aug 17 18:08:11 2017

build: hg19

display range: chr4:23324255–24124255 [23324255–24124255]

hilite range: 0 – 0 [ 0 – 0 ]

reference SNP: chr4:23724255

number of SNPs plotted: 4219

min P.value: 3.62E–21 [chr4:23724255]

max P.value: 10E–1 [chr4:23936858]

omitted GWAS Hits: NA

## GWAS Catalog SNPs in Region

| <b>chr</b> | <b>pos (Mb)</b> | <b>trait</b>                                                        | <b>snp</b>  |
|------------|-----------------|---------------------------------------------------------------------|-------------|
| 4          | 23.42360        | Schizophrenia                                                       | rs215411    |
| 4          | 23.58846        | Thiazide-induced adverse metabolic effects in hypertensive patients | rs1511453   |
| 4          | 23.79434        | Cognitive decline rate in late mild cognitive impairment            | rs41359445  |
| 4          | 23.85057        | Cognitive decline rate in late mild cognitive impairment            | rs188794202 |
| 4          | 23.95102        | Gout                                                                | rs12501032  |
| 4          | 23.95102        | Resting heart rate                                                  | rs12501032  |

# TBSS\_FA\_Superior\_cerebellar\_peduncle\_L

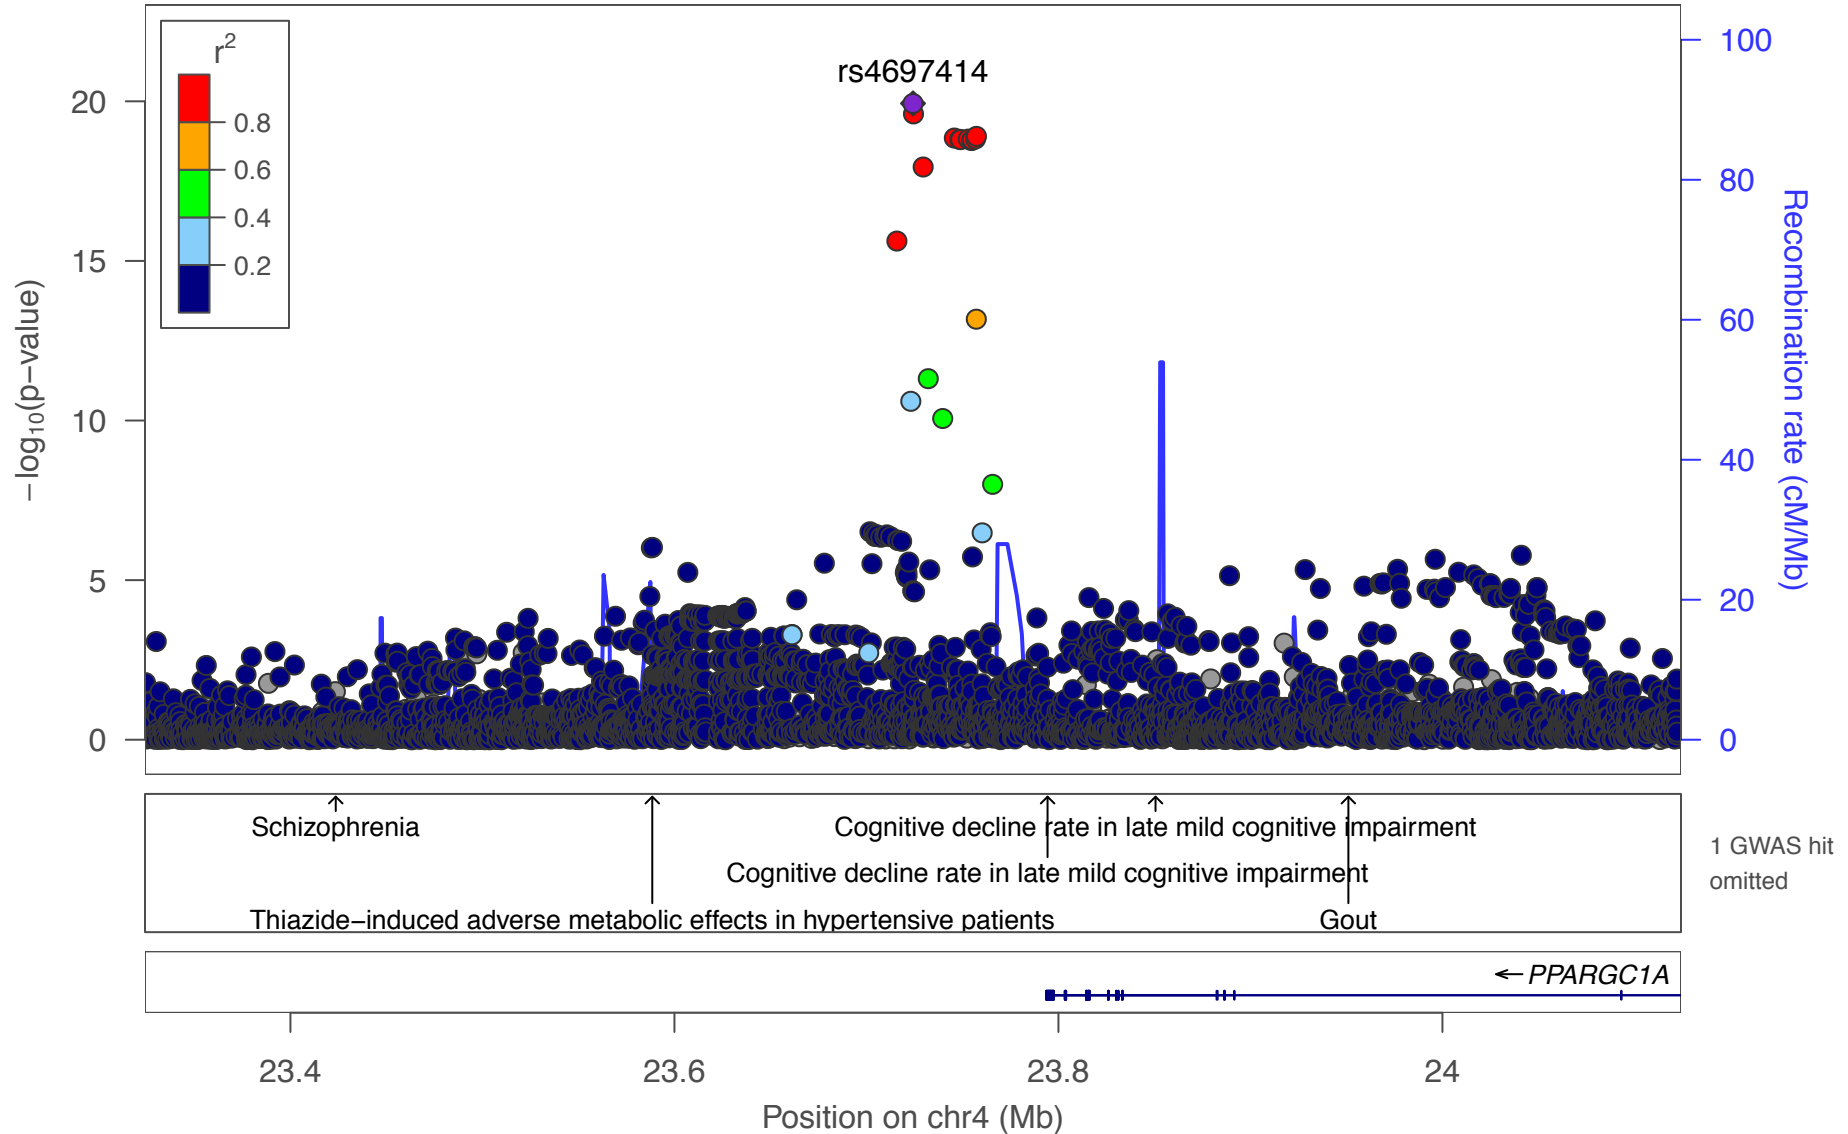

date: Thu Aug 17 18:08:11 2017

build: hg19

display range: chr4:23324255–24124255 [23324255–24124255]

hilite range: 0 – 0 [ 0 – 0 ]

reference SNP: chr4:23724255

number of SNPs plotted: 4219

min P.value: 1.16E–20 [chr4:23724255]

max P.value: 10E–1 [chr4:23475489]

omitted GWAS Hits: NA

## GWAS Catalog SNPs in Region

| <b>chr</b> | <b>pos (Mb)</b> | <b>trait</b>                                                        | <b>snp</b>  |
|------------|-----------------|---------------------------------------------------------------------|-------------|
| 4          | 23.42360        | Schizophrenia                                                       | rs215411    |
| 4          | 23.58846        | Thiazide-induced adverse metabolic effects in hypertensive patients | rs1511453   |
| 4          | 23.79434        | Cognitive decline rate in late mild cognitive impairment            | rs41359445  |
| 4          | 23.85057        | Cognitive decline rate in late mild cognitive impairment            | rs188794202 |
| 4          | 23.95102        | Gout                                                                | rs12501032  |
| 4          | 23.95102        | Resting heart rate                                                  | rs12501032  |

# TBSS\_ICVF\_Superior\_cerebellar\_peduncle\_R

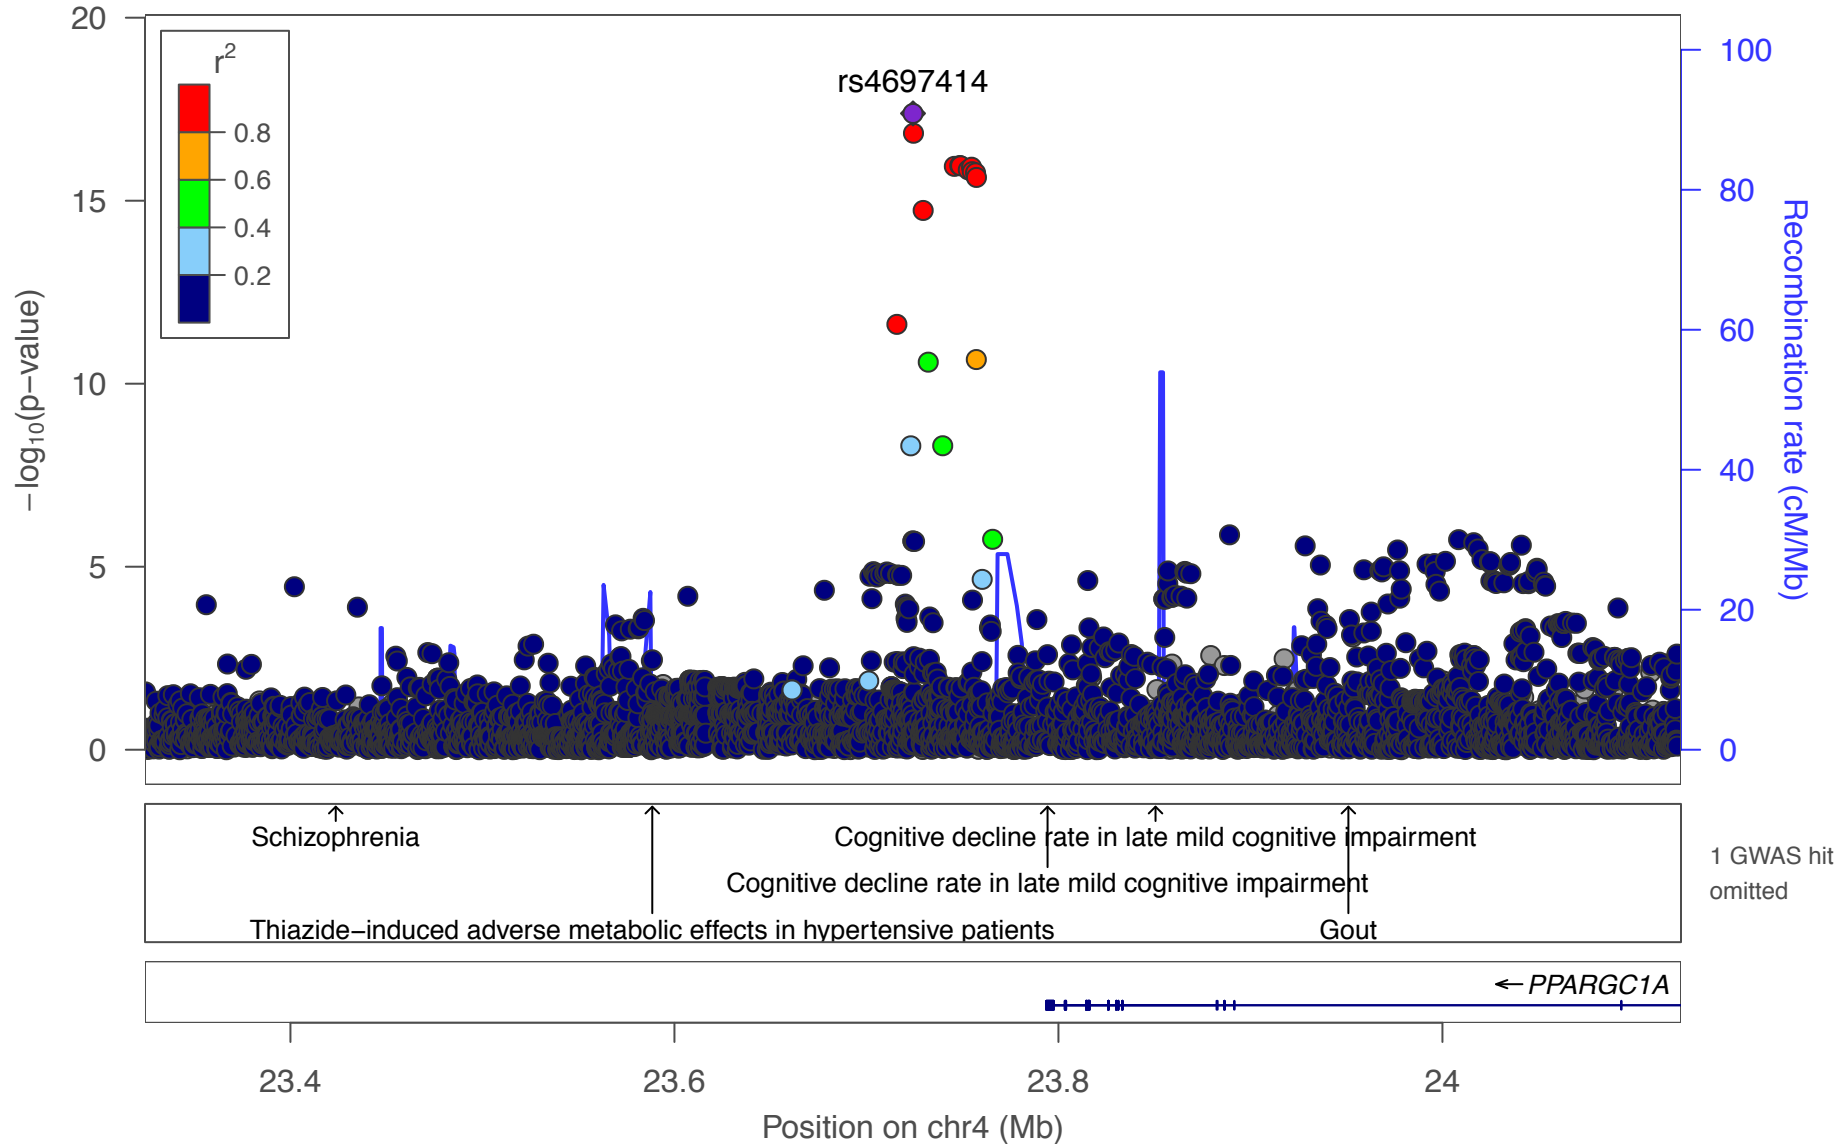

date: Thu Aug 17 18:08:11 2017

build: hg19

display range: chr4:23324255–24124255 [23324255–24124255]

hilite range: 0 – 0 [ 0 – 0 ]

reference SNP: chr4:23724255

number of SNPs plotted: 4219

min P.value: 4.12E–18 [chr4:23724255]

max P.value: 10E–1 [chr4:23551534]

omitted GWAS Hits: NA



## GWAS Catalog SNPs in Region

| <b>chr</b> | <b>pos (Mb)</b> | <b>trait</b>                                                        | <b>snp</b>  |
|------------|-----------------|---------------------------------------------------------------------|-------------|
| 4          | 23.42360        | Schizophrenia                                                       | rs215411    |
| 4          | 23.58846        | Thiazide-induced adverse metabolic effects in hypertensive patients | rs1511453   |
| 4          | 23.79434        | Cognitive decline rate in late mild cognitive impairment            | rs41359445  |
| 4          | 23.85057        | Cognitive decline rate in late mild cognitive impairment            | rs188794202 |
| 4          | 23.95102        | Gout                                                                | rs12501032  |
| 4          | 23.95102        | Resting heart rate                                                  | rs12501032  |

# TBSS\_ICVF\_Superior\_cerebellar\_peduncle\_L

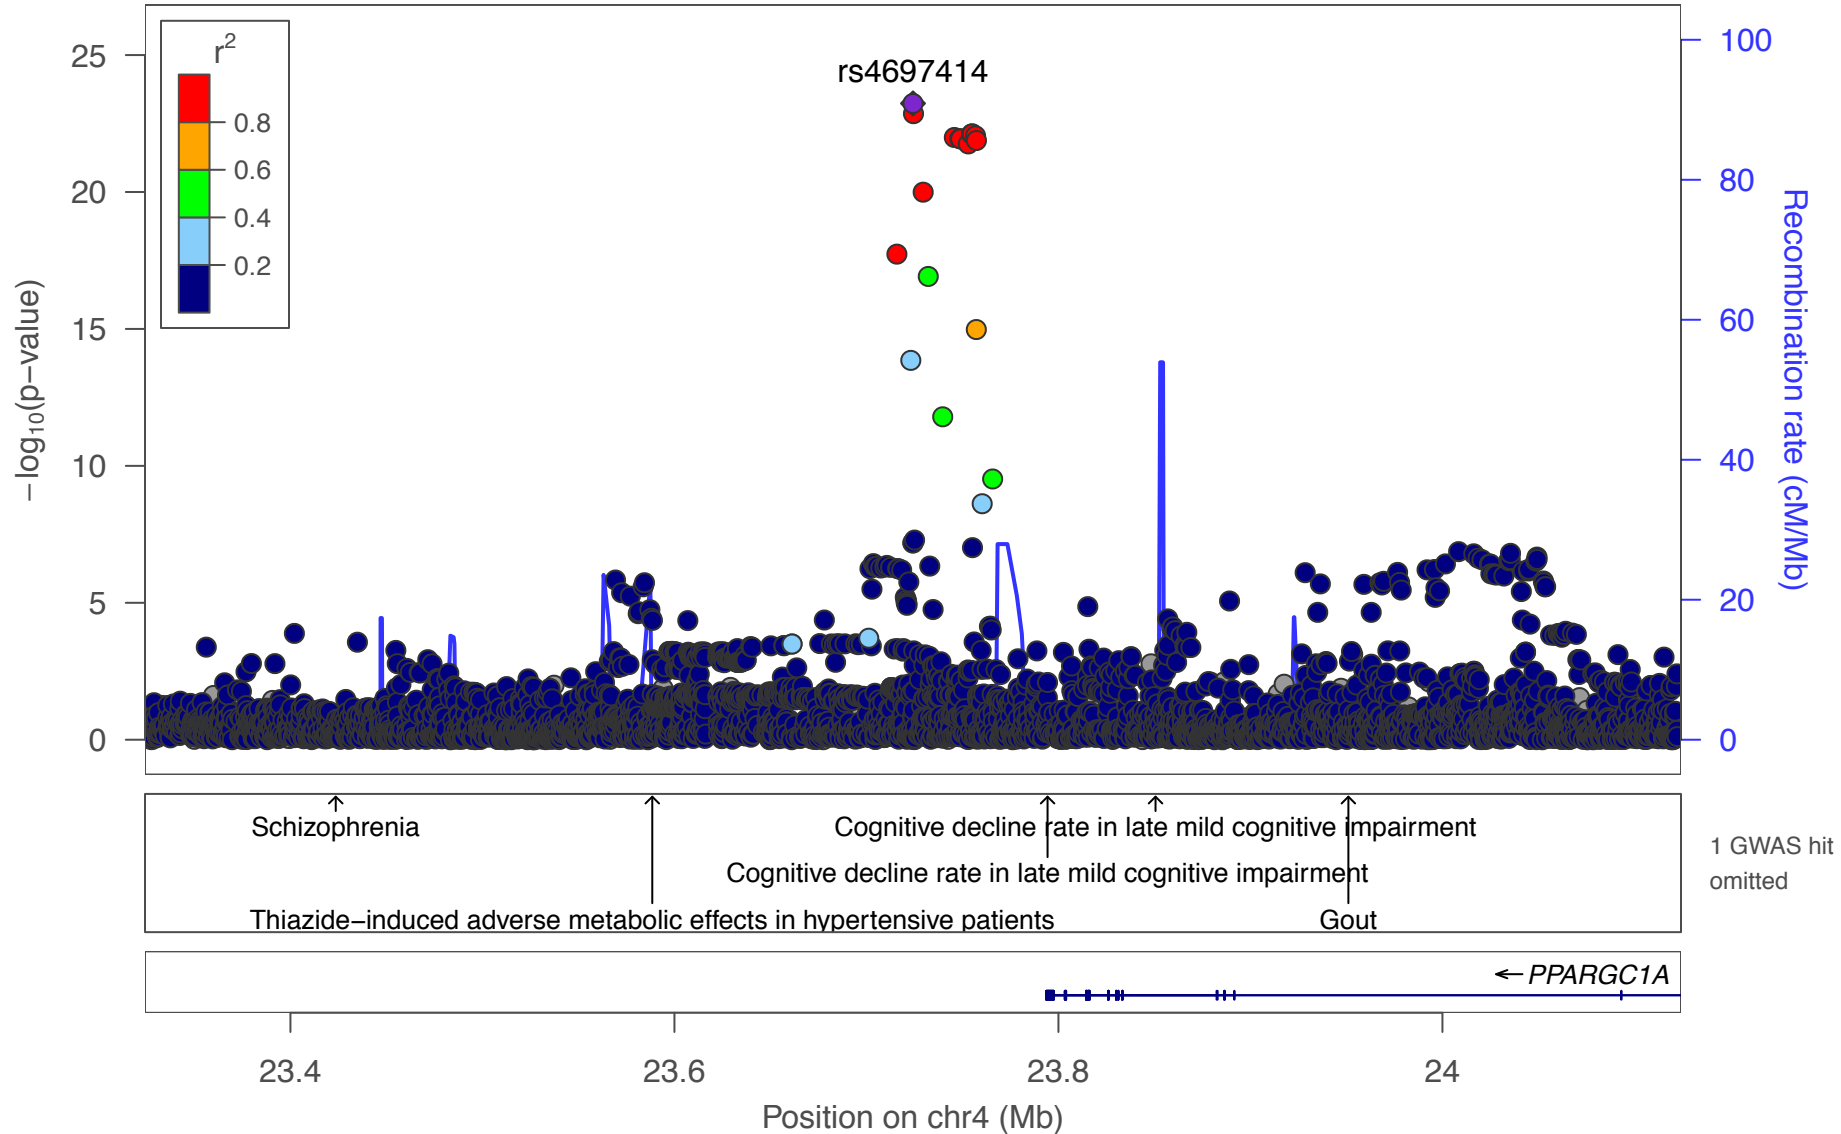

date: Thu Aug 17 18:08:11 2017

build: hg19

display range: chr4:23324255–24124255 [23324255–24124255]

hilite range: 0 – 0 [ 0 – 0 ]

reference SNP: chr4:23724255

number of SNPs plotted: 4219

min P.value: 5.83E–24 [chr4:23724255]

max P.value: 10E–1 [chr4:23483330]

omitted GWAS Hits: NA

## GWAS Catalog SNPs in Region

| <b>chr</b> | <b>pos (Mb)</b> | <b>trait</b>                                                        | <b>snp</b>  |
|------------|-----------------|---------------------------------------------------------------------|-------------|
| 4          | 23.42360        | Schizophrenia                                                       | rs215411    |
| 4          | 23.58846        | Thiazide-induced adverse metabolic effects in hypertensive patients | rs1511453   |
| 4          | 23.79434        | Cognitive decline rate in late mild cognitive impairment            | rs41359445  |
| 4          | 23.85057        | Cognitive decline rate in late mild cognitive impairment            | rs188794202 |
| 4          | 23.95102        | Gout                                                                | rs12501032  |
| 4          | 23.95102        | Resting heart rate                                                  | rs12501032  |

# TBSS\_L2\_Superior\_cerebellar\_peduncle\_R

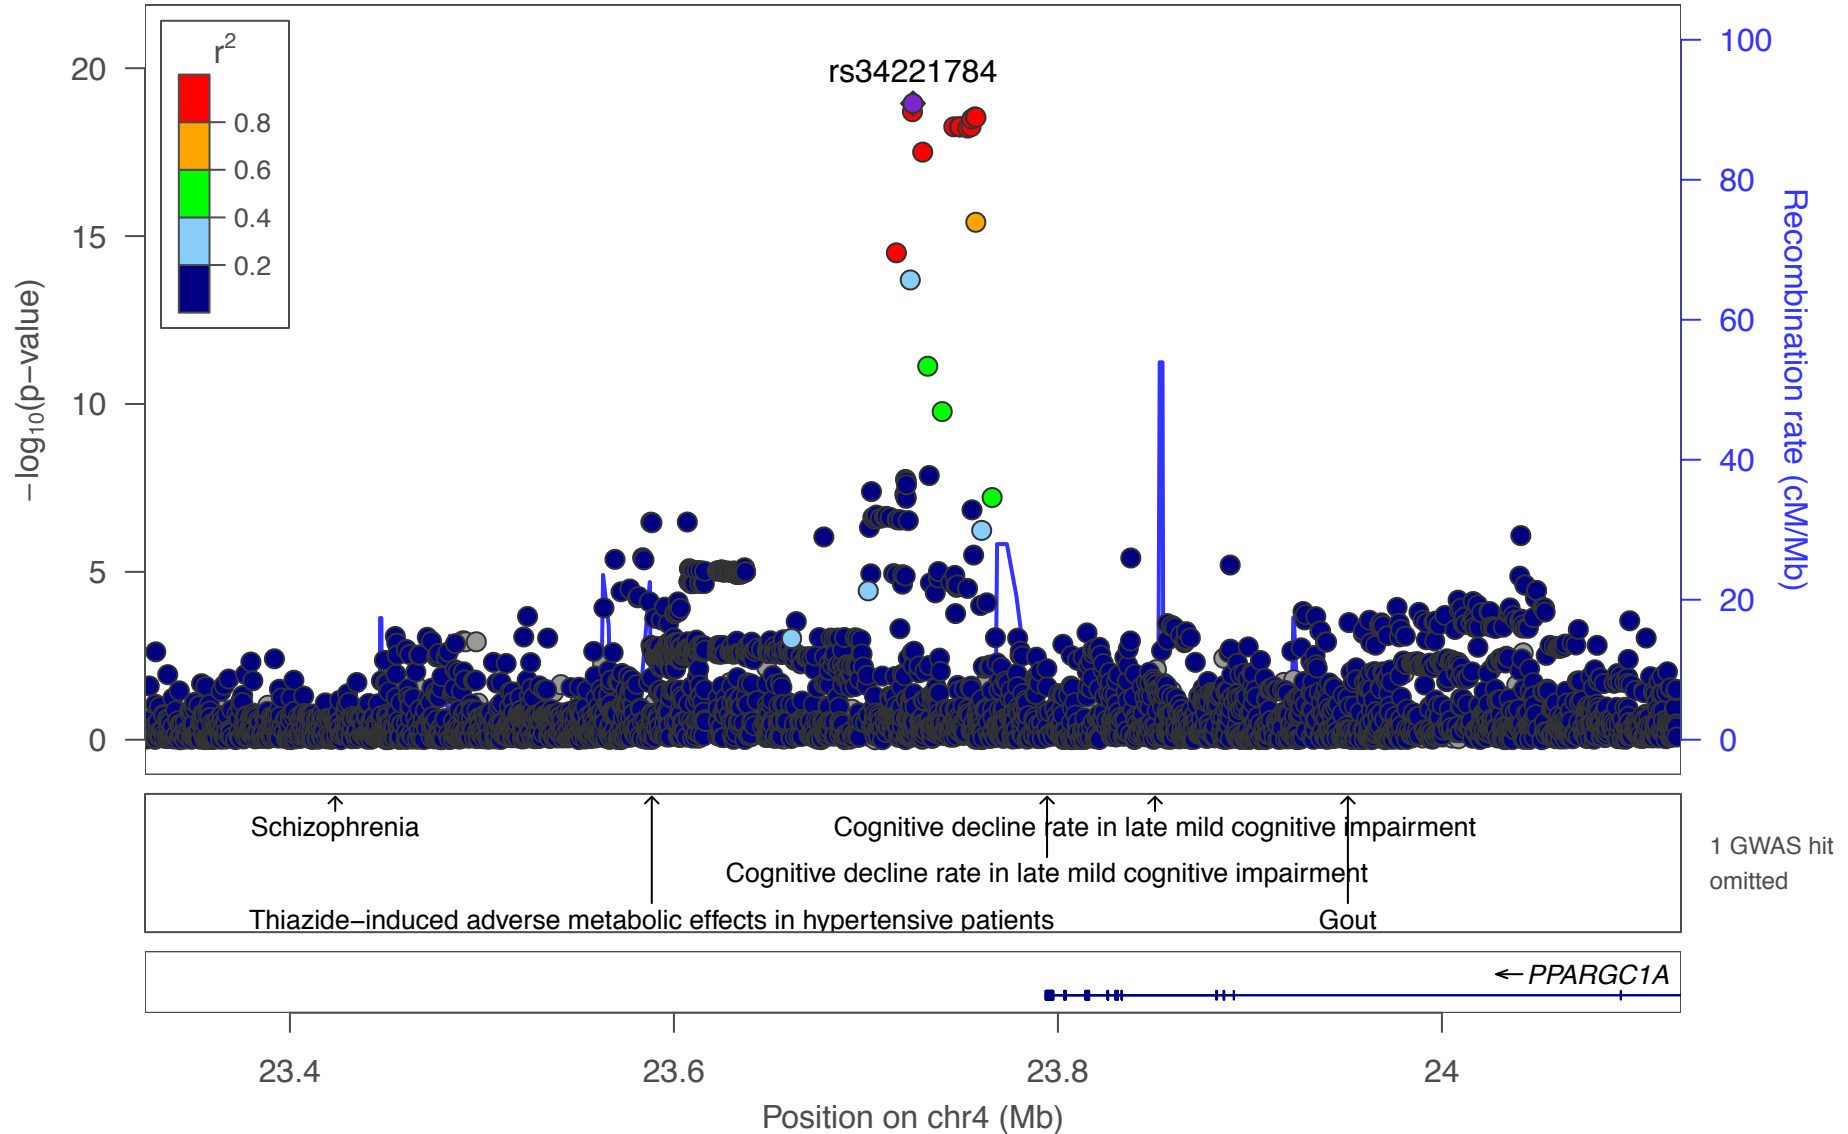

date: Thu Aug 17 18:08:11 2017

build: hg19

display range: chr4:23324518–24124518 [23324518–24124518]

hilite range: 0 – 0 [ 0 – 0 ]

reference SNP: chr4:23724518

number of SNPs plotted: 4218

min P.value: 1.12E–19 [chr4:23724518]

max P.value: 10E–1 [chr4:23342785]

omitted GWAS Hits: NA

## GWAS Catalog SNPs in Region

| <b>chr</b> | <b>pos (Mb)</b> | <b>trait</b>                                                        | <b>snp</b>  |
|------------|-----------------|---------------------------------------------------------------------|-------------|
| 4          | 23.42360        | Schizophrenia                                                       | rs215411    |
| 4          | 23.58846        | Thiazide-induced adverse metabolic effects in hypertensive patients | rs1511453   |
| 4          | 23.79434        | Cognitive decline rate in late mild cognitive impairment            | rs41359445  |
| 4          | 23.85057        | Cognitive decline rate in late mild cognitive impairment            | rs188794202 |
| 4          | 23.95102        | Gout                                                                | rs12501032  |
| 4          | 23.95102        | Resting heart rate                                                  | rs12501032  |

# TBSS\_L2\_Superior\_cerebellar\_peduncle\_L

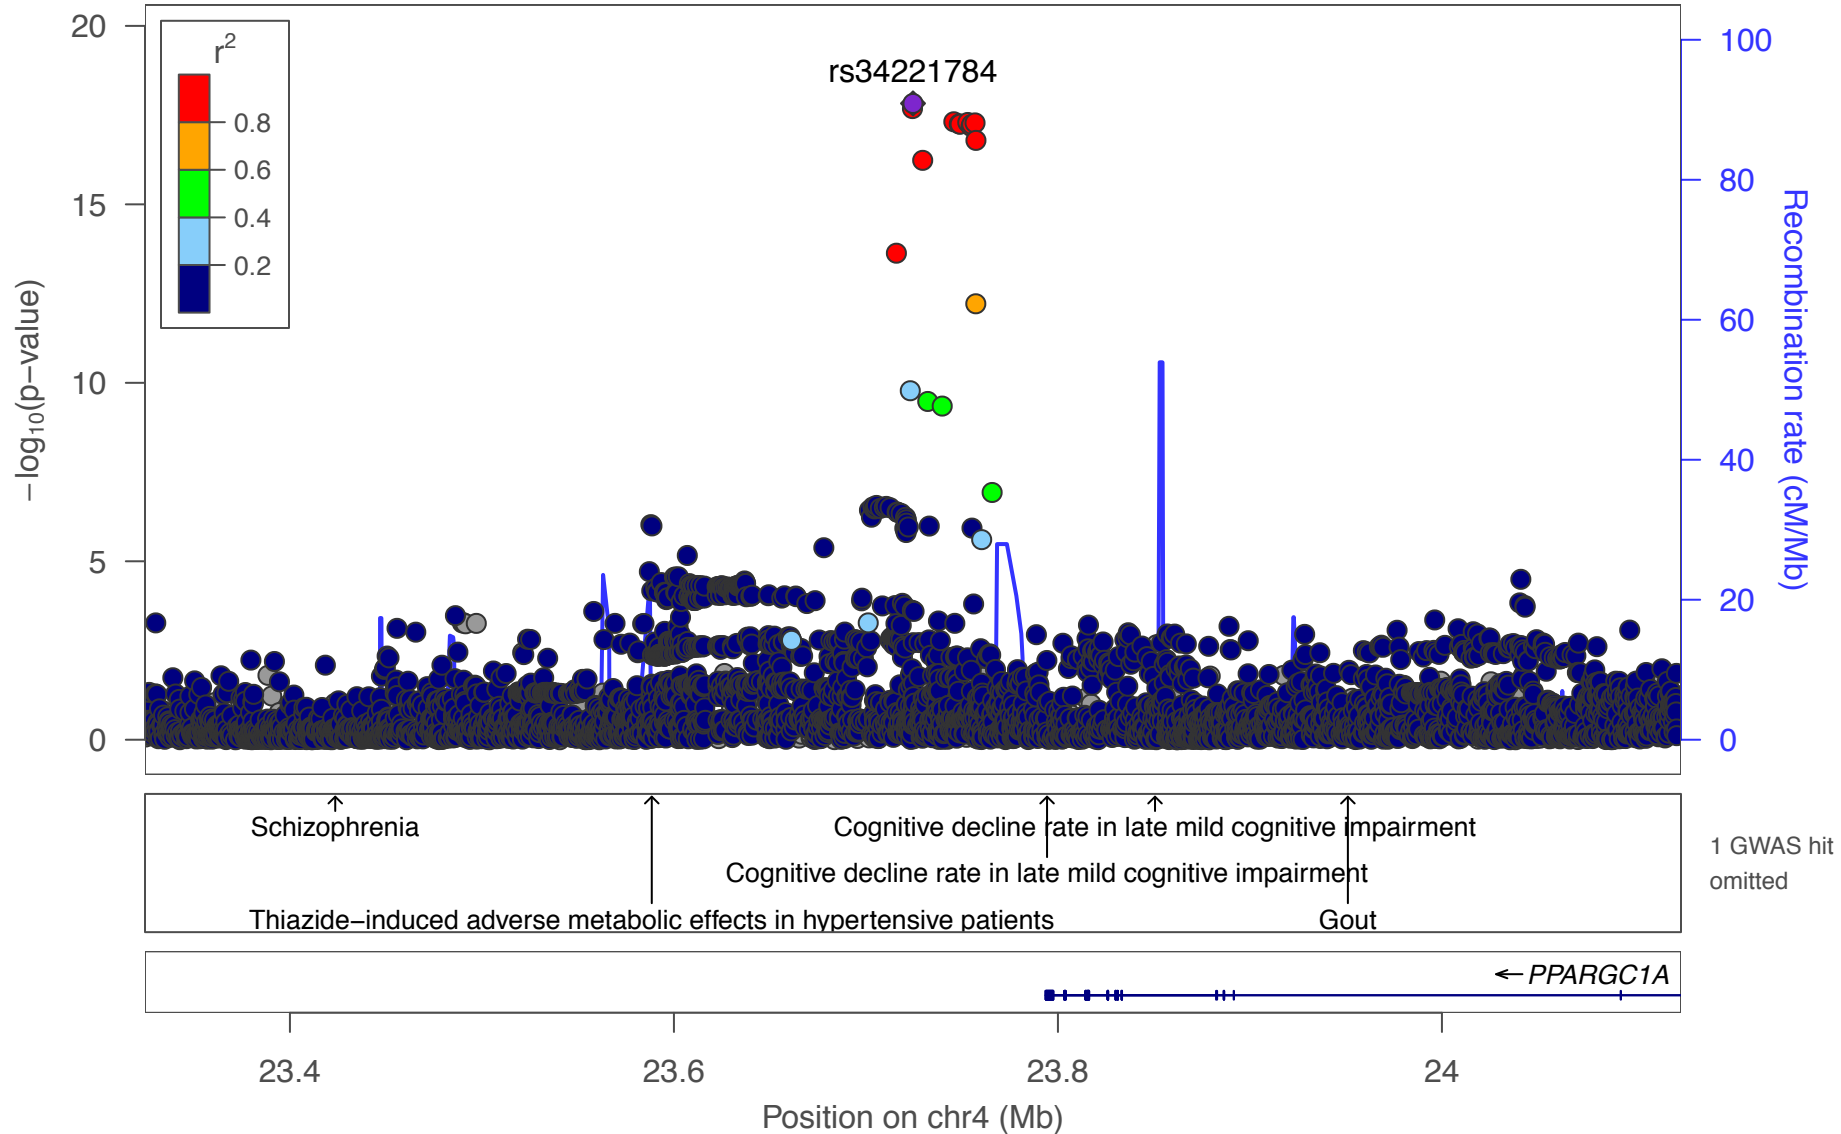



date: Thu Aug 17 18:08:12 2017

build: hg19

display range: chr4:23324518–24124518 [23324518–24124518]

hilite range: 0 – 0 [ 0 – 0 ]

reference SNP: chr4:23724518

number of SNPs plotted: 4218

min P.value: 1.49E–18 [chr4:23724518]

max P.value: 10E–1 [chr4:23878838]

omitted GWAS Hits: NA

## GWAS Catalog SNPs in Region

| <b>chr</b> | <b>pos (Mb)</b> | <b>trait</b>                                                        | <b>snp</b>  |
|------------|-----------------|---------------------------------------------------------------------|-------------|
| 4          | 23.42360        | Schizophrenia                                                       | rs215411    |
| 4          | 23.58846        | Thiazide-induced adverse metabolic effects in hypertensive patients | rs1511453   |
| 4          | 23.79434        | Cognitive decline rate in late mild cognitive impairment            | rs41359445  |
| 4          | 23.85057        | Cognitive decline rate in late mild cognitive impairment            | rs188794202 |
| 4          | 23.95102        | Gout                                                                | rs12501032  |
| 4          | 23.95102        | Resting heart rate                                                  | rs12501032  |

# TBSS\_L3\_Superior\_cerebellar\_peduncle\_R

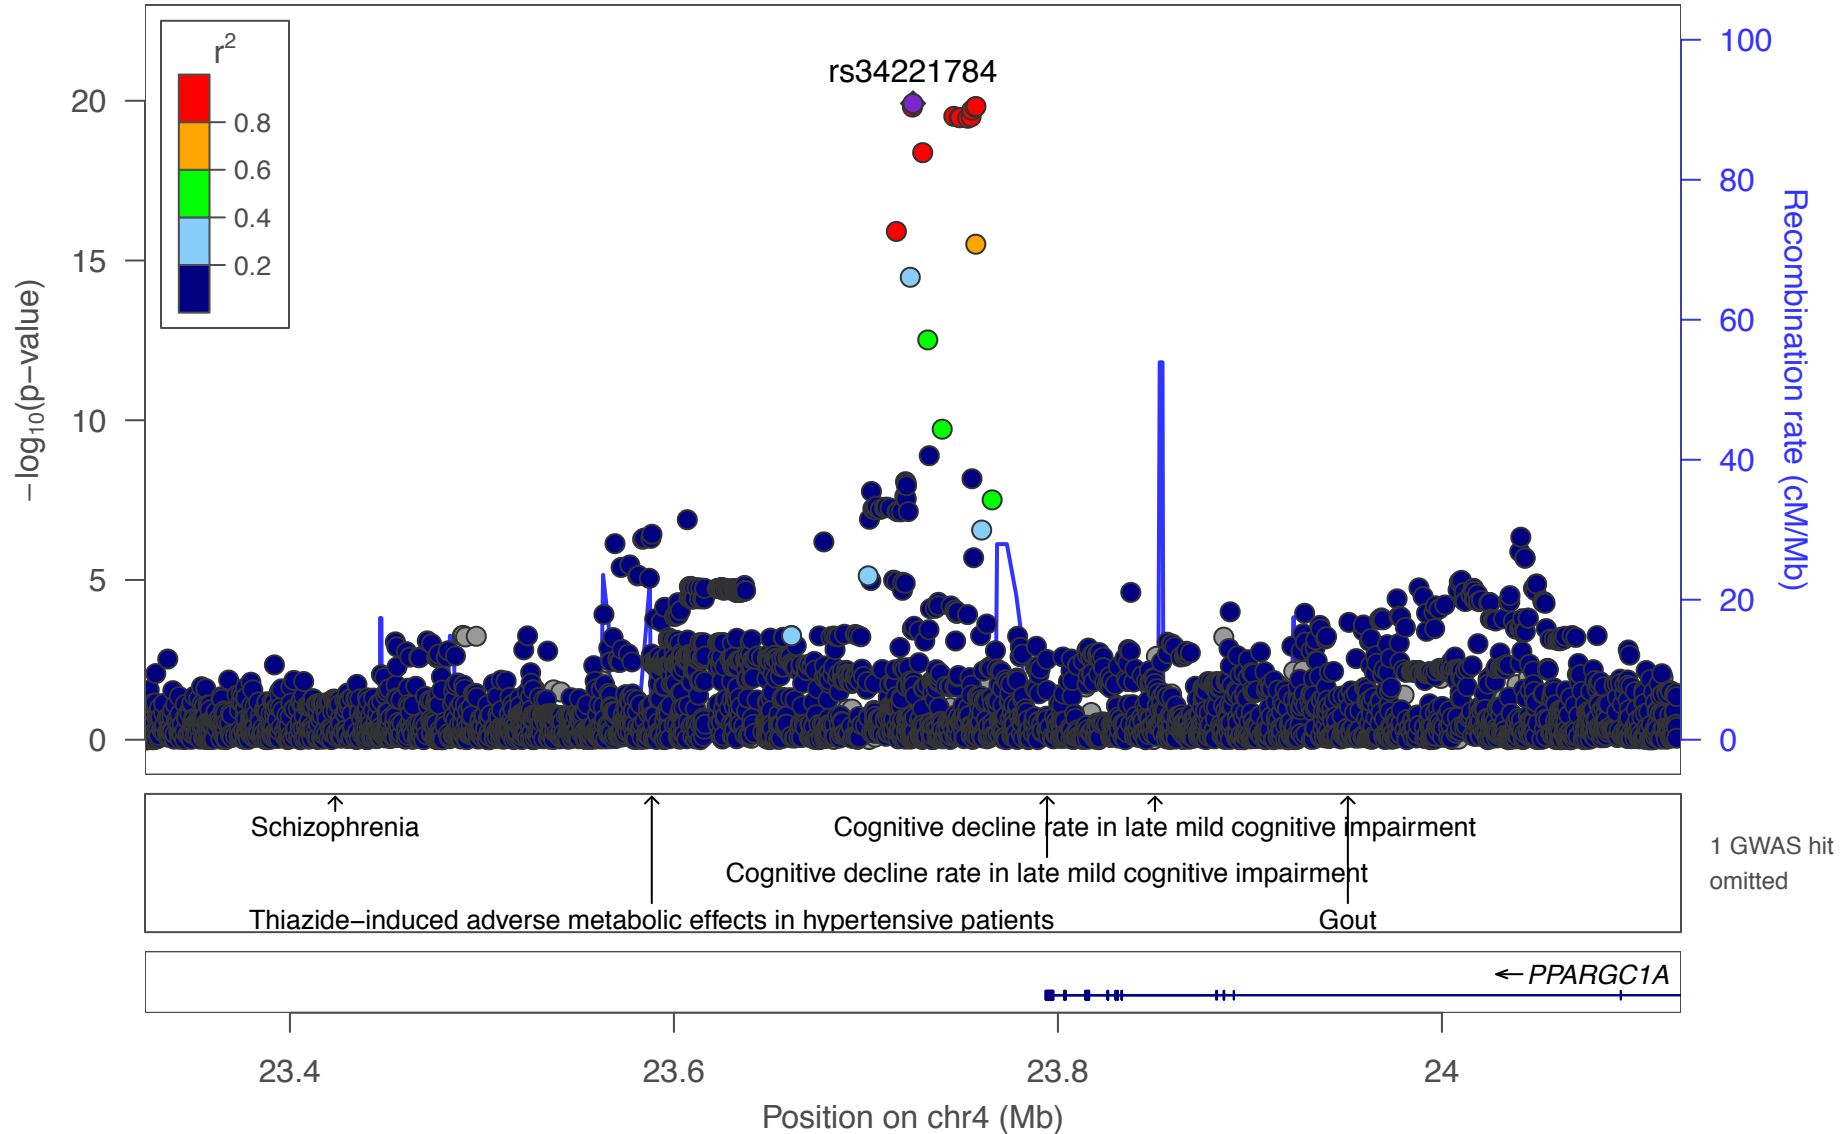

date: Thu Aug 17 18:08:12 2017

build: hg19

display range: chr4:23324518–24124518 [23324518–24124518]

hilite range: 0 – 0 [ 0 – 0 ]

reference SNP: chr4:23724518

number of SNPs plotted: 4218

min P.value: 1.21E–20 [chr4:23724518]

max P.value: 10E–1 [chr4:23326313]

omitted GWAS Hits: NA

## GWAS Catalog SNPs in Region

| <b>chr</b> | <b>pos (Mb)</b> | <b>trait</b>                                                        | <b>snp</b>  |
|------------|-----------------|---------------------------------------------------------------------|-------------|
| 4          | 23.42360        | Schizophrenia                                                       | rs215411    |
| 4          | 23.58846        | Thiazide-induced adverse metabolic effects in hypertensive patients | rs1511453   |
| 4          | 23.79434        | Cognitive decline rate in late mild cognitive impairment            | rs41359445  |
| 4          | 23.85057        | Cognitive decline rate in late mild cognitive impairment            | rs188794202 |
| 4          | 23.95102        | Gout                                                                | rs12501032  |
| 4          | 23.95102        | Resting heart rate                                                  | rs12501032  |

# TBSS\_L3\_Superior\_cerebellar\_peduncle\_L

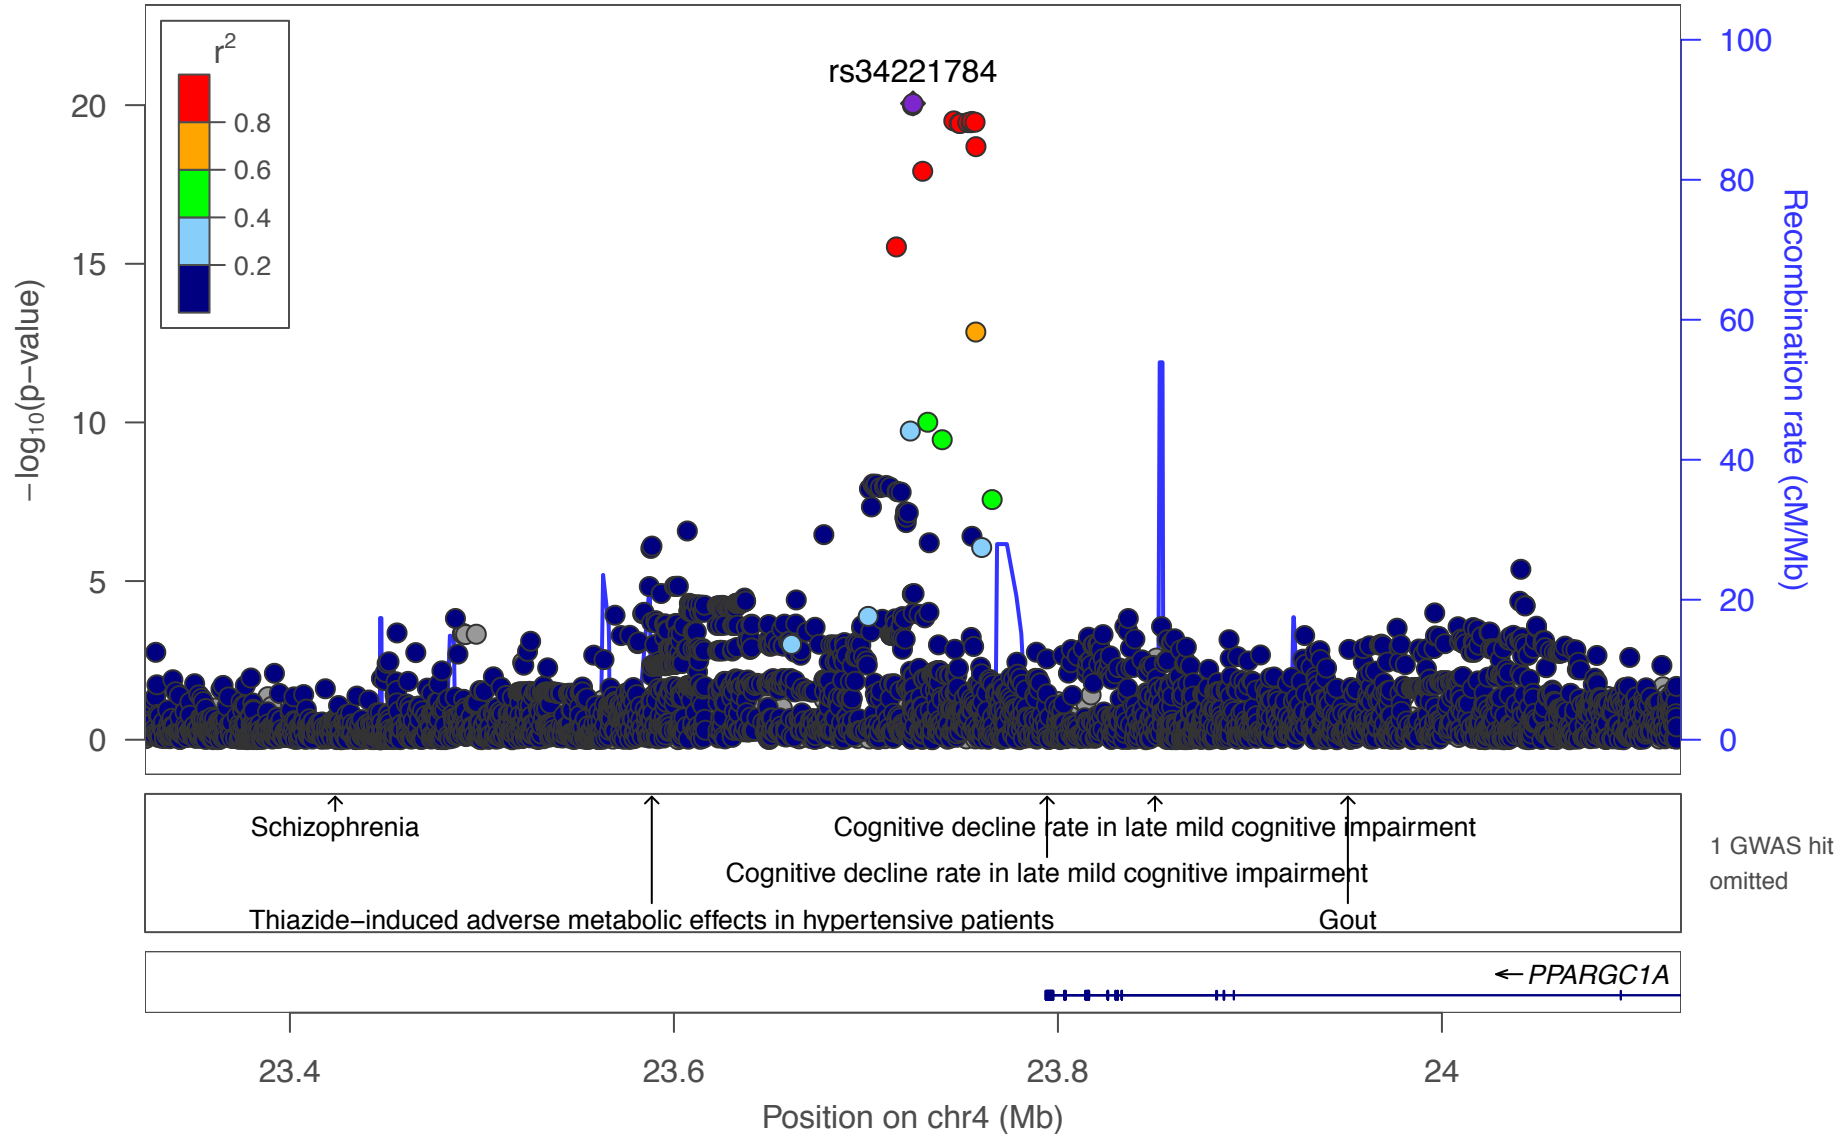

date: Thu Aug 17 18:08:12 2017

build: hg19

display range: chr4:23324518–24124518 [23324518–24124518]

hilite range: 0 – 0 [ 0 – 0 ]

reference SNP: chr4:23724518

number of SNPs plotted: 4218

min P.value: 8.83E–21 [chr4:23724518]

max P.value: 9.99E–1 [chr4:23515759]

omitted GWAS Hits: NA

## GWAS Catalog SNPs in Region

| <b>chr</b> | <b>pos (Mb)</b> | <b>trait</b>                                                        | <b>snp</b>  |
|------------|-----------------|---------------------------------------------------------------------|-------------|
| 4          | 23.42360        | Schizophrenia                                                       | rs215411    |
| 4          | 23.58846        | Thiazide-induced adverse metabolic effects in hypertensive patients | rs1511453   |
| 4          | 23.79434        | Cognitive decline rate in late mild cognitive impairment            | rs41359445  |
| 4          | 23.85057        | Cognitive decline rate in late mild cognitive impairment            | rs188794202 |
| 4          | 23.95102        | Gout                                                                | rs12501032  |
| 4          | 23.95102        | Resting heart rate                                                  | rs12501032  |



# FAST\_ROIs\_L\_putamen

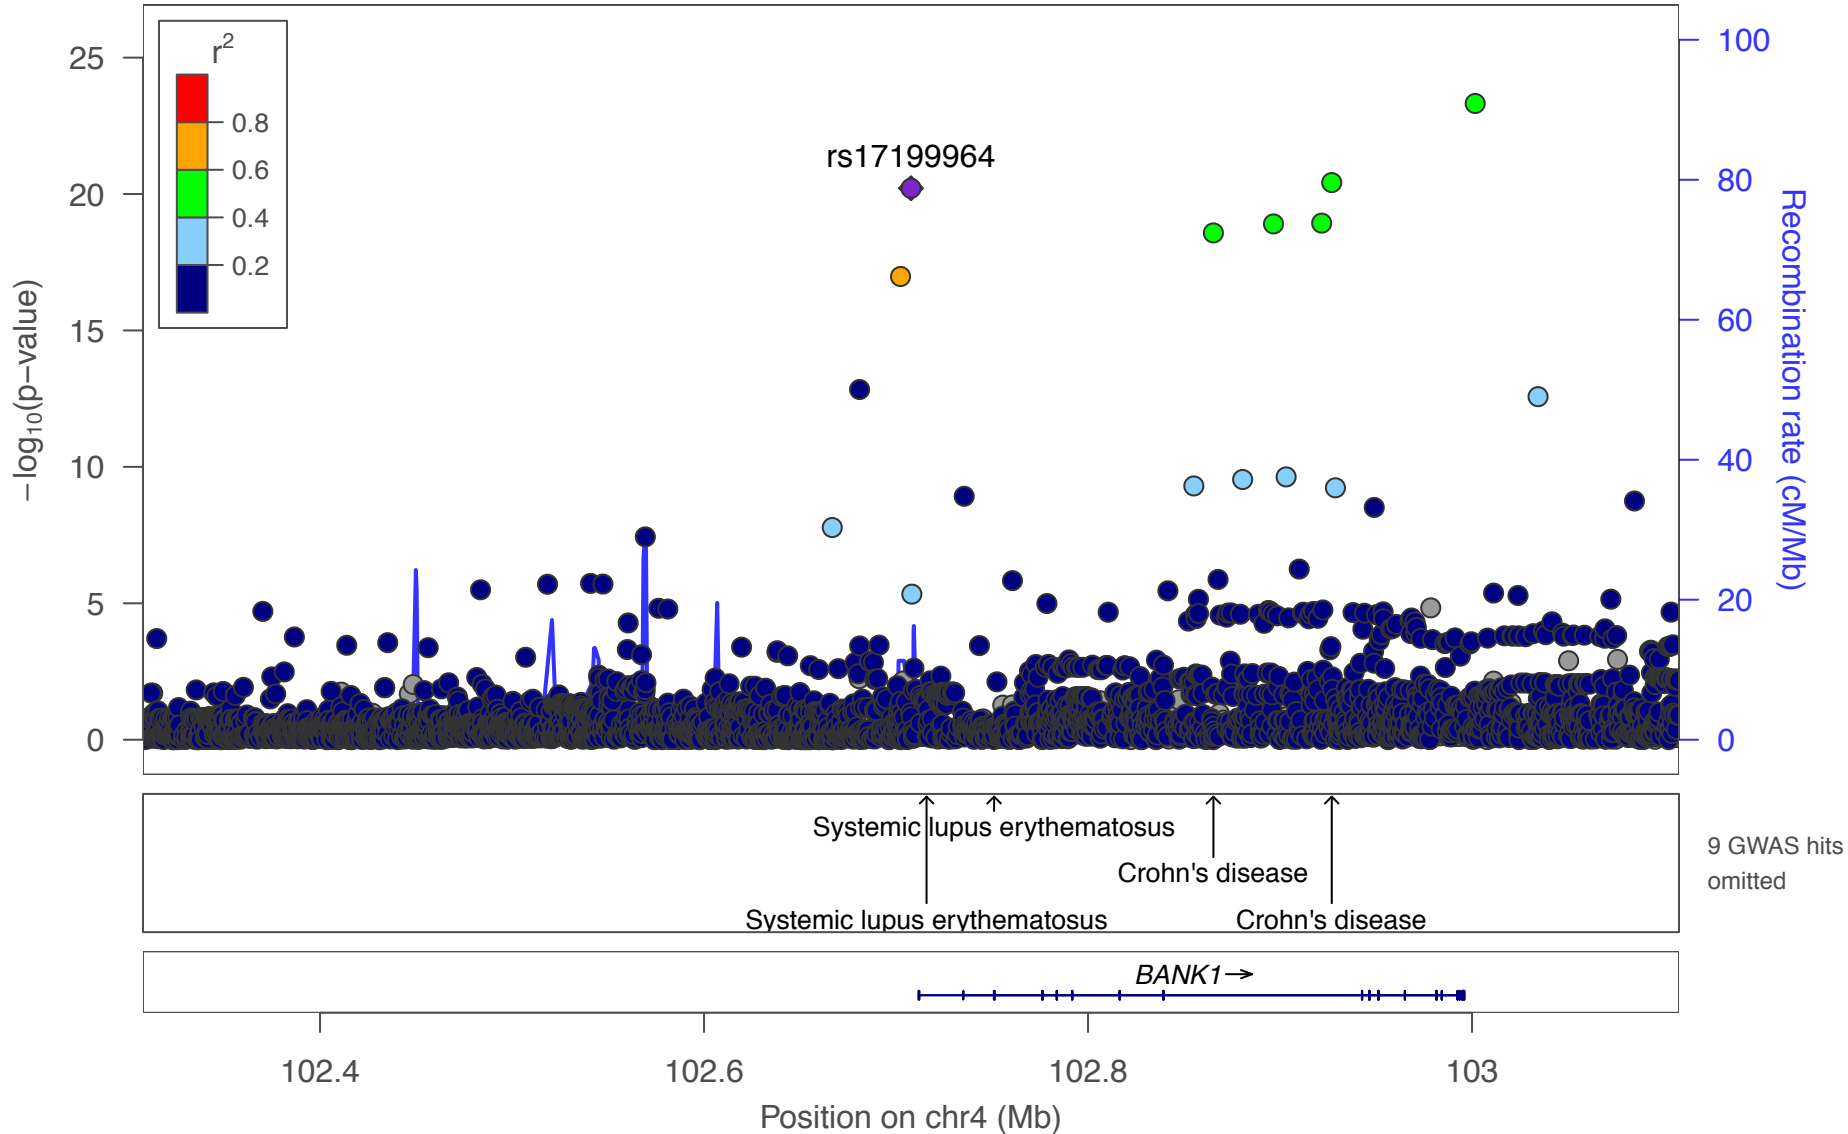

date: Thu Aug 17 18:09:36 2017

build: hg19

display range: chr4:102307791–103107791 [102307791–103107791]

hilite range: 0 – 0 [ 0 – 0 ]

reference SNP: chr4:102707791

number of SNPs plotted: 3927

min P.value: 4.78E–24 [chr4:103001649]

max P.value: 10E–1 [chr4:102430974]

omitted GWAS Hits: chr4:102.926923–Crohn's disease, NA

omitted GWAS Hits: NA, NA

omitted GWAS Hits: NA, NA

# GWAS Catalog SNPs in Region

## trait

C-reactive protein and white blood cell count

Acute urticaria and angioedema (non-steroidal anti-inflammatory drug-induced)

Blood pressure

Autism spectrum disorder, attention deficit-hyperactivity disorder, bipolar disorder, major depressive disorder, and schizophrenia (combined)

Systemic lupus erythematosus

Systemic lupus erythematosus

Chronic lymphocytic leukemia

Systemic lupus erythematosus

Schizophrenia

Crohn's disease

Inflammatory bowel disease

Crohn's disease

Alzheimer disease and age of onset

# FAST\_ROIs\_R\_putamen

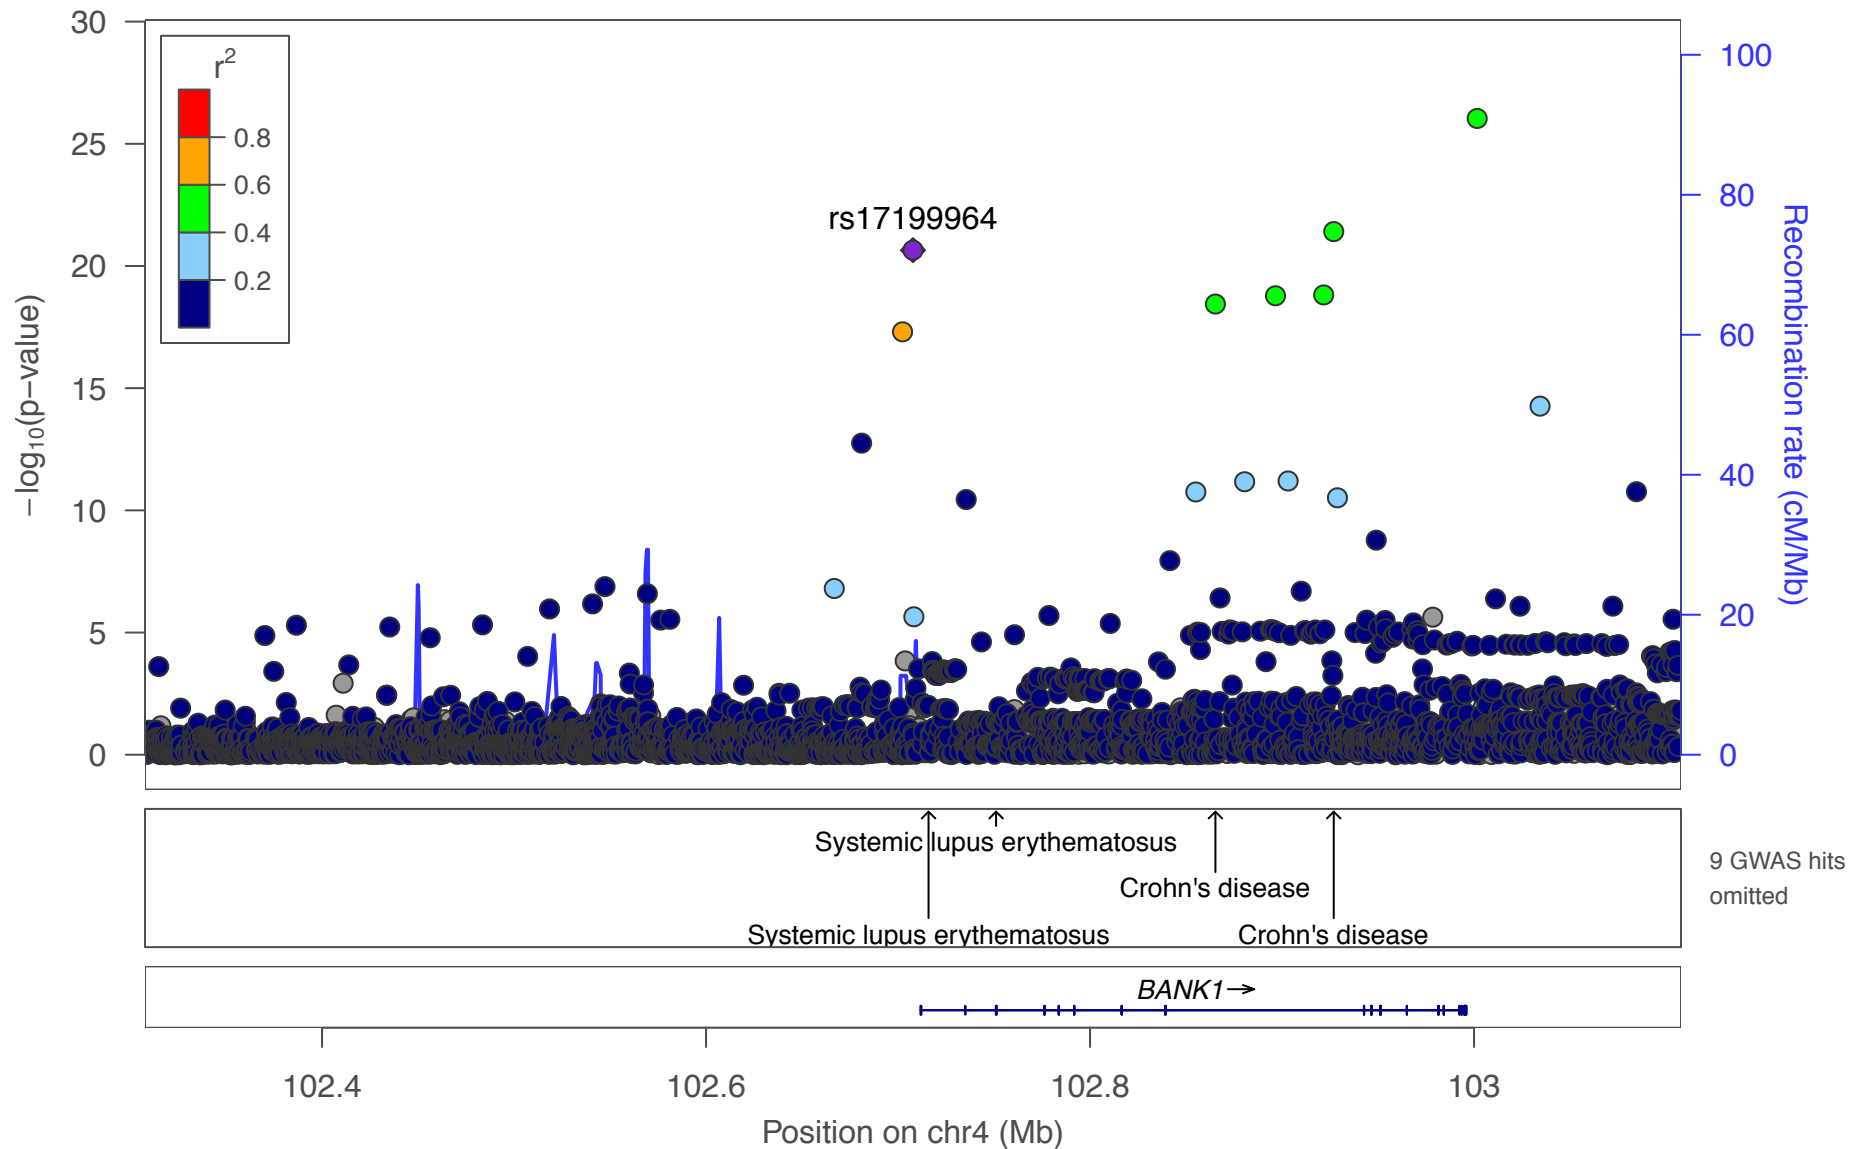

date: Thu Aug 17 18:09:36 2017

build: hg19

display range: chr4:102307791–103107791 [102307791–103107791]

hilite range: 0 – 0 [ 0 – 0 ]

reference SNP: chr4:102707791

number of SNPs plotted: 3927

min P.value: 9.16E–27 [chr4:103001649]

max P.value: 10E–1 [chr4:102530982]

omitted GWAS Hits: chr4:102.926923–Crohn's disease, NA

omitted GWAS Hits: NA, NA

omitted GWAS Hits: NA, NA

# GWAS Catalog SNPs in Region

## trait

C-reactive protein and white blood cell count

Acute urticaria and angioedema (non-steroidal anti-inflammatory drug-induced)

Blood pressure

Autism spectrum disorder, attention deficit-hyperactivity disorder, bipolar disorder, major depressive disorder, and schizophrenia (combined)

Systemic lupus erythematosus

Systemic lupus erythematosus

Chronic lymphocytic leukemia

Systemic lupus erythematosus

Schizophrenia

Crohn's disease

Inflammatory bowel disease

Crohn's disease

Alzheimer disease and age of onset

# FAST\_ROIs\_L\_ventral\_striatum

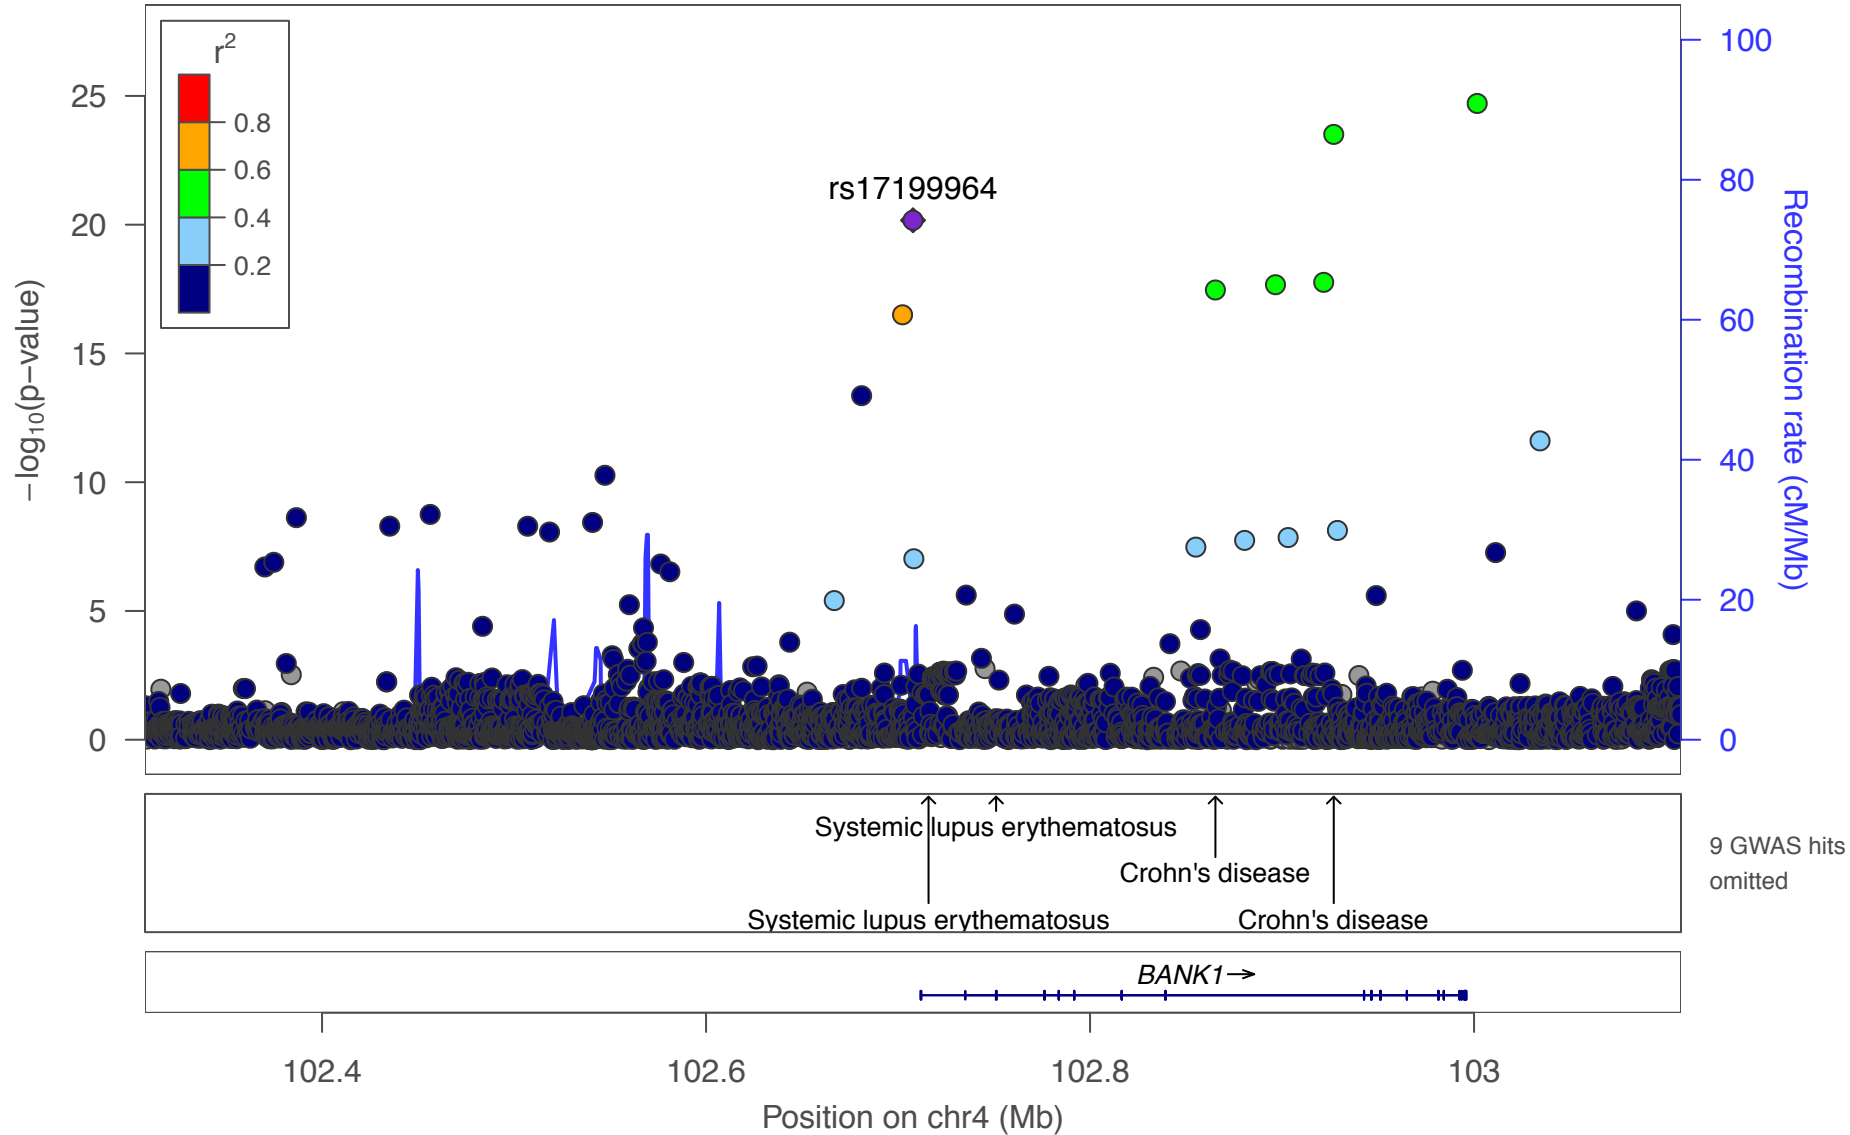

date: Thu Aug 17 18:09:36 2017

build: hg19

display range: chr4:102307791–103107791 [102307791–103107791]

hilite range: 0 – 0 [ 0 – 0 ]

reference SNP: chr4:102707791

number of SNPs plotted: 3927

min P.value: 1.95E–25 [chr4:103001649]

max P.value: 9.99E–1 [chr4:103023170]

omitted GWAS Hits: chr4:102.926923–Crohn's disease, NA

omitted GWAS Hits: NA, NA

omitted GWAS Hits: NA, NA



# GWAS Catalog SNPs in Region

## trait

C-reactive protein and white blood cell count

Acute urticaria and angioedema (non-steroidal anti-inflammatory drug-induced)

Blood pressure

Autism spectrum disorder, attention deficit-hyperactivity disorder, bipolar disorder, major depressive disorder, and schizophrenia (combined)

Systemic lupus erythematosus

Systemic lupus erythematosus

Chronic lymphocytic leukemia

Systemic lupus erythematosus

Schizophrenia

Crohn's disease

Inflammatory bowel disease

Crohn's disease

Alzheimer disease and age of onset

# FAST\_ROIs\_R\_ventral\_striatum

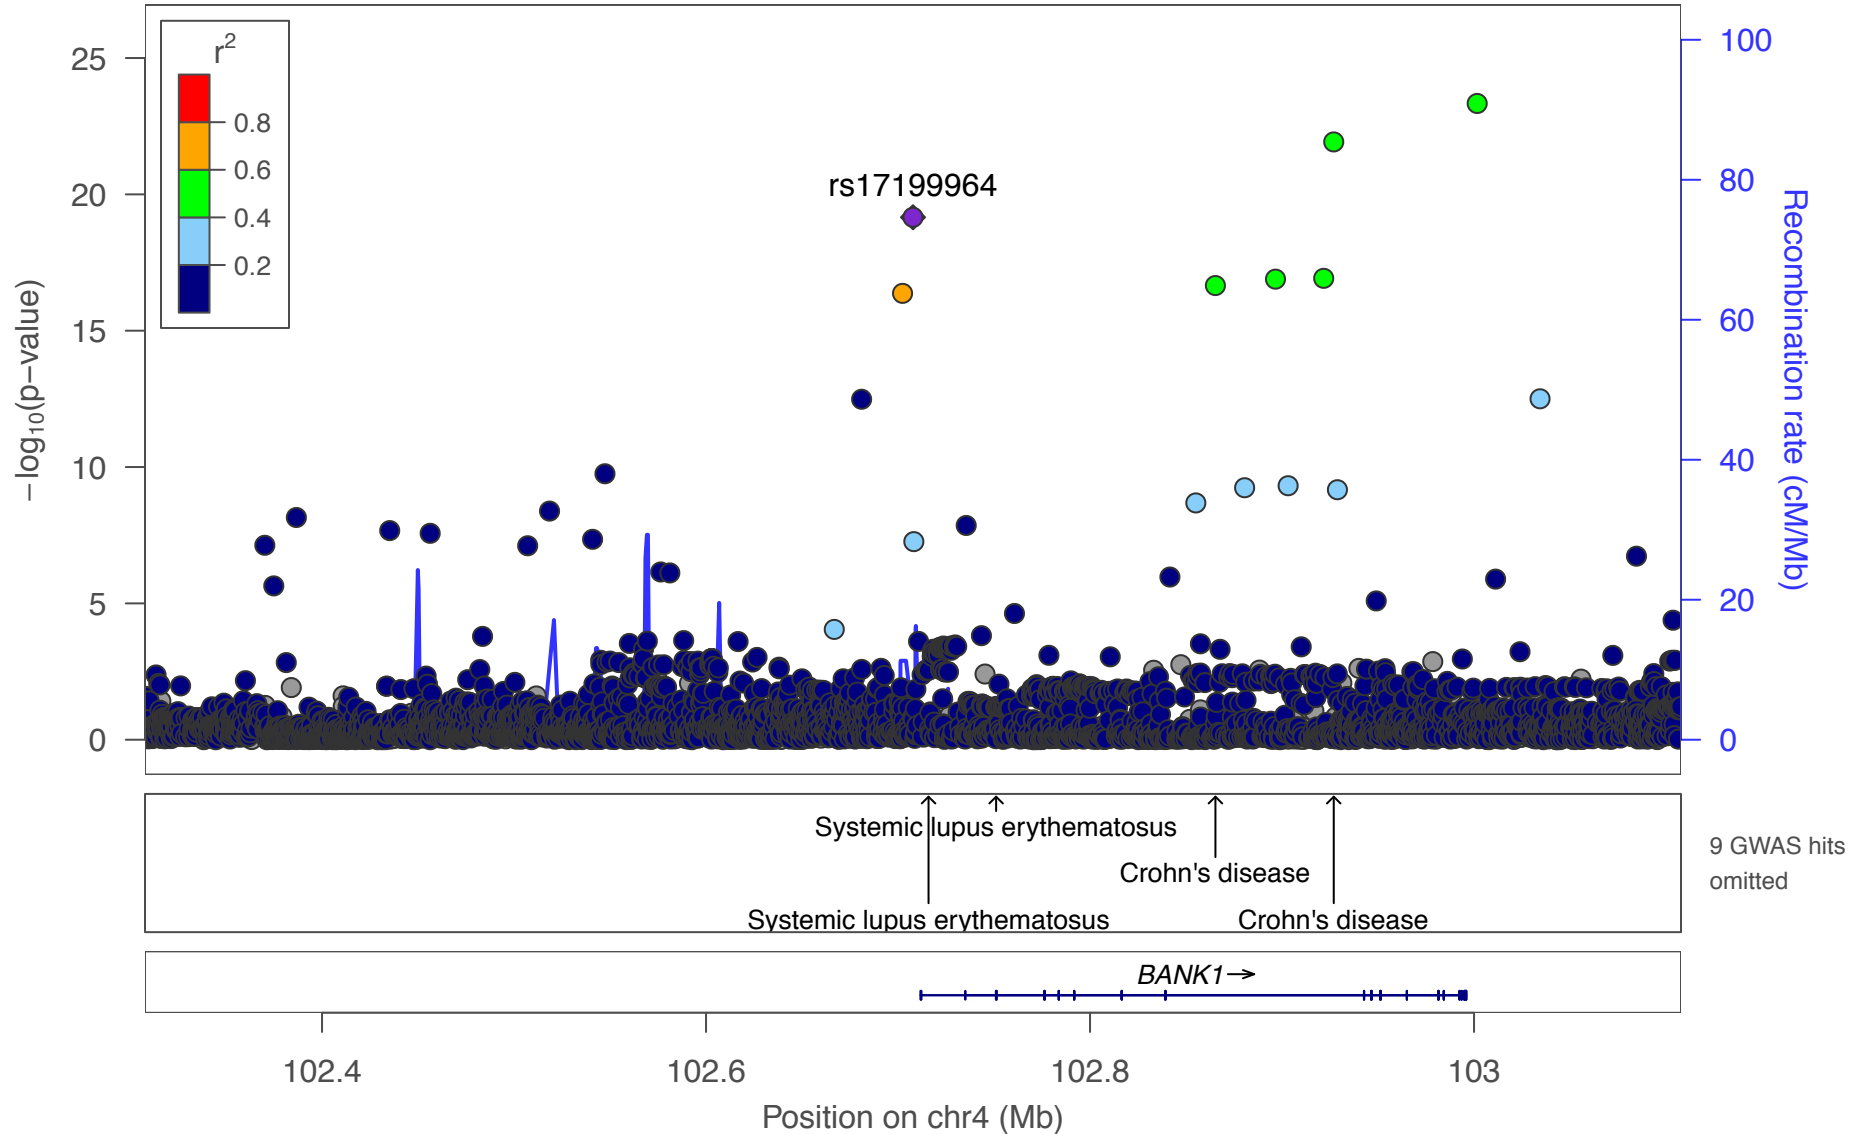

date: Thu Aug 17 18:09:36 2017

build: hg19

display range: chr4:102307791–103107791 [102307791–103107791]

hilite range: 0 – 0 [ 0 – 0 ]

reference SNP: chr4:102707791

number of SNPs plotted: 3927

min P.value: 4.62E–24 [chr4:103001649]

max P.value: 9.99E–1 [chr4:102412860]

omitted GWAS Hits: chr4:102.926923–Crohn's disease, NA

omitted GWAS Hits: NA, NA

omitted GWAS Hits: NA, NA

# GWAS Catalog SNPs in Region

## trait

C-reactive protein and white blood cell count

Acute urticaria and angioedema (non-steroidal anti-inflammatory drug-induced)

Blood pressure

Autism spectrum disorder, attention deficit-hyperactivity disorder, bipolar disorder, major depressive disorder, and schizophrenia (combined)

Systemic lupus erythematosus

Systemic lupus erythematosus

Chronic lymphocytic leukemia

Systemic lupus erythematosus

Schizophrenia

Crohn's disease

Inflammatory bowel disease

Crohn's disease

Alzheimer disease and age of onset

# SWI\_T2star\_left\_pallidum

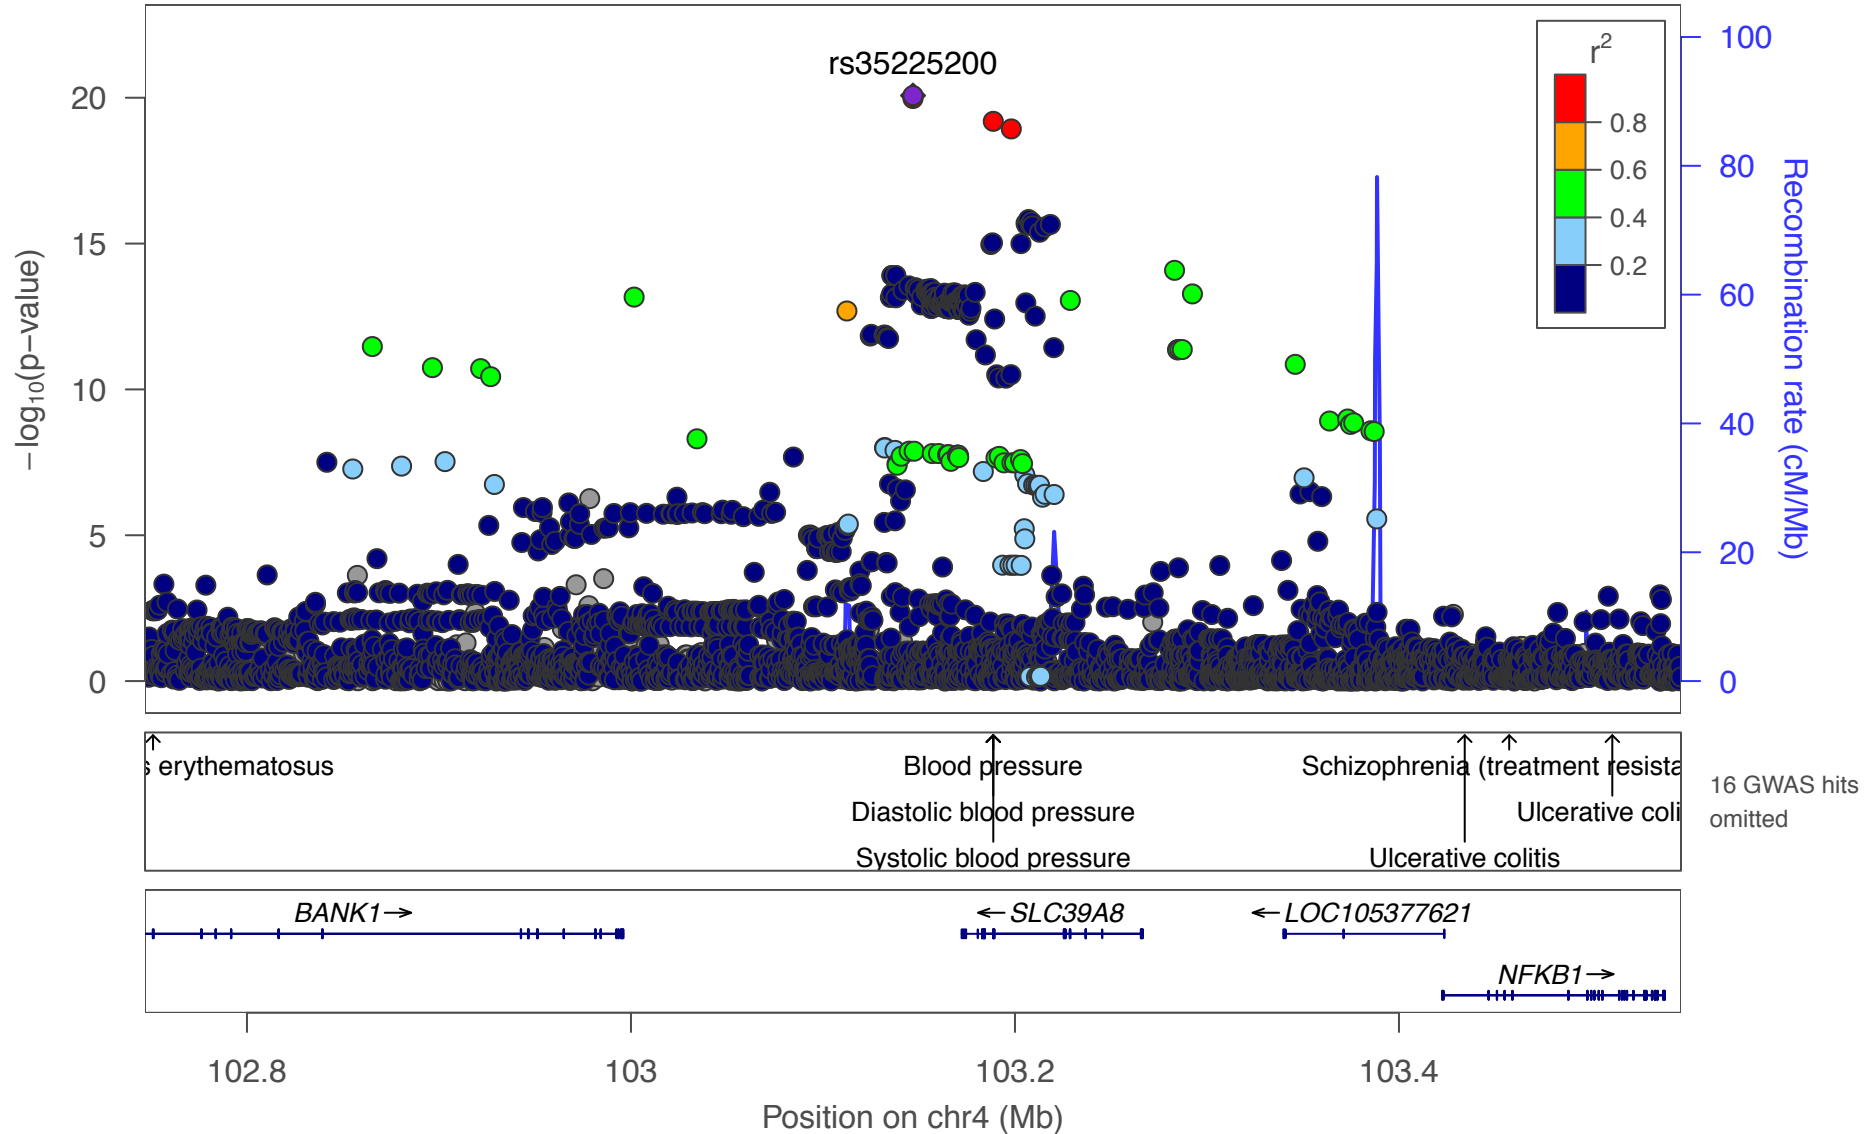

date: Thu Aug 17 18:09:15 2017

build: hg19

display range: chr4:102746888–103546888 [102746888–103546888]

hilite range: 0 – 0 [ 0 – 0 ]

reference SNP: chr4:103146888

number of SNPs plotted: 3536

min P.value: 8.41E–21 [chr4:103146888]

max P.value: 10E–1 [chr4:103285398]

omitted GWAS Hits: chr4:103.457418–Schizophrenia (treatment resistant), chr4:103.511114–Ulcerative colitis

omitted GWAS Hits: NA, NA

omitted GWAS Hits: NA

GWAS Catalog SNPs in Region

| chr | pos (Mb) | trait                                                            | snp         |
|-----|----------|------------------------------------------------------------------|-------------|
| 4   | 102.7511 | Systemic lupus erythematosus                                     | rs10516487  |
| 4   | 102.8416 | Schizophrenia                                                    | rs13119516  |
| 4   | 102.8653 | Crohn's disease                                                  | rs13126505  |
| 4   | 102.8653 | Inflammatory bowel disease                                       | rs13126505  |
| 4   | 102.9269 | Crohn's disease                                                  | rs34592089  |
| 4   | 103.0542 | Alzheimer disease and age of onset                               | rs115641191 |
| 4   | 103.1469 | Schizophrenia                                                    | rs35518360  |
| 4   | 103.1887 | Blood pressure                                                   | rs13107325  |
| 4   | 103.1887 | Diastolic blood pressure                                         | rs13107325  |
| 4   | 103.1887 | Systolic blood pressure                                          | rs13107325  |
| 4   | 103.1887 | Hypertension                                                     | rs13107325  |
| 4   | 103.1887 | HDL cholesterol                                                  | rs13107325  |
| 4   | 103.1887 | Body mass index                                                  | rs13107325  |
| 4   | 103.1887 | Schizophrenia                                                    | rs13107325  |
| 4   | 103.1887 | NT-proBNP levels in acute coronary syndrome                      | rs13107325  |
| 4   | 103.1887 | Childhood body mass index                                        | rs13107325  |
| 4   | 103.1981 | HDL cholesterol                                                  | rs13135092  |
| 4   | 103.2048 | Sitting height ratio                                             | rs233817    |
| 4   | 103.2557 | Erythrocyte cadmium concentration in never smokers               | rs7664683   |
| 4   | 103.3497 | Homeostasis model assessment of beta-cell function (interaction) | rs6533014   |
| 4   | 103.4343 | Ulcerative colitis                                               | rs3774937   |

## GWAS Catalog SNPs in Region

| <b>chr</b> | <b>pos (Mb)</b> | <b>trait</b>                        | <b>snp</b> |
|------------|-----------------|-------------------------------------|------------|
| 4          | 103.4574        | Schizophrenia (treatment resistant) | rs230529   |
| 4          | 103.5111        | Ulcerative colitis                  | rs3774959  |



# SWI\_T2star\_left\_pallidum\_plus\_right\_pallidum

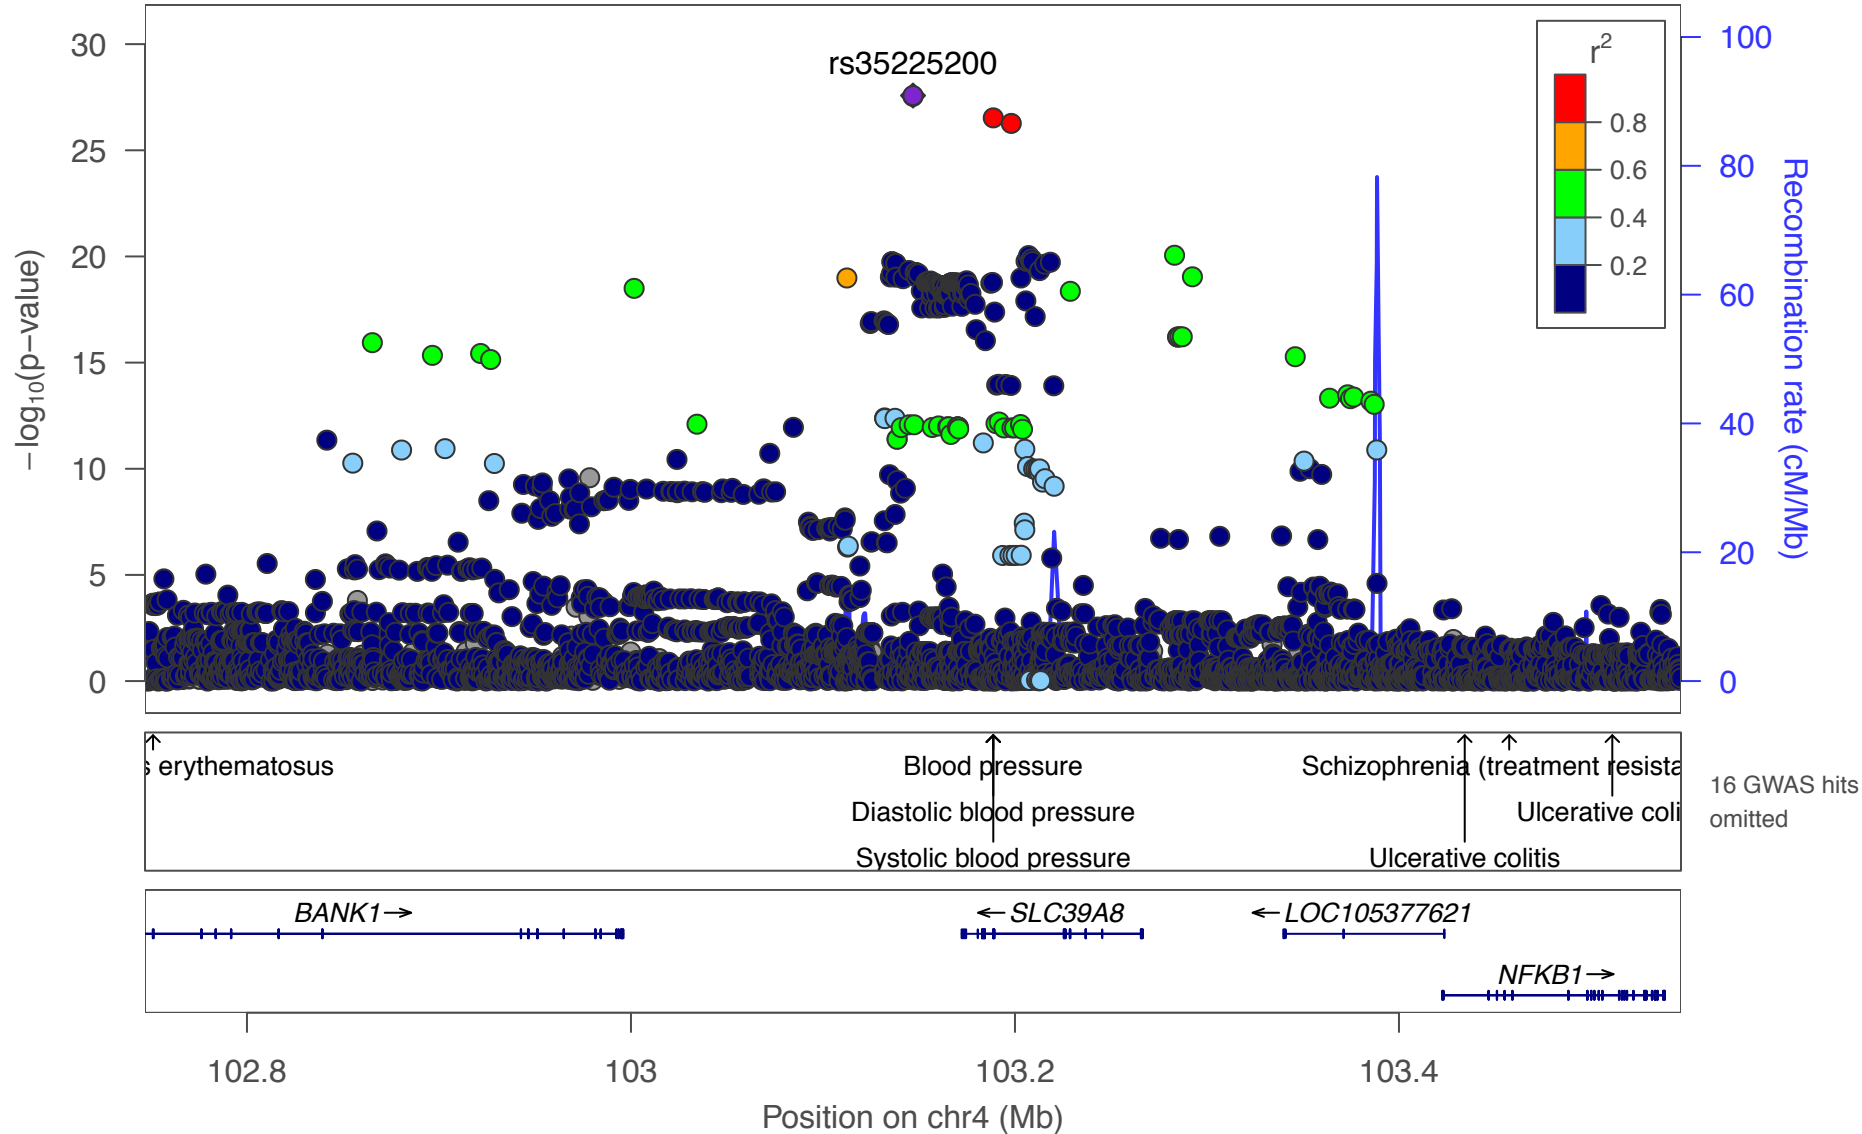

date: Thu Aug 17 18:09:15 2017

build: hg19

display range: chr4:102746888–103546888 [102746888–103546888]

hilite range: 0 – 0 [ 0 – 0 ]

reference SNP: chr4:103146888

number of SNPs plotted: 3536

min P.value: 2.64E–28 [chr4:103146888]

max P.value: 9.99E–1 [chr4:103280897]

omitted GWAS Hits: chr4:103.457418–Schizophrenia (treatment resistant), chr4:103.511114–Ulcerative colitis

omitted GWAS Hits: NA, NA

omitted GWAS Hits: NA

GWAS Catalog SNPs in Region

| chr | pos (Mb) | trait                                                            | snp         |
|-----|----------|------------------------------------------------------------------|-------------|
| 4   | 102.7511 | Systemic lupus erythematosus                                     | rs10516487  |
| 4   | 102.8416 | Schizophrenia                                                    | rs13119516  |
| 4   | 102.8653 | Crohn's disease                                                  | rs13126505  |
| 4   | 102.8653 | Inflammatory bowel disease                                       | rs13126505  |
| 4   | 102.9269 | Crohn's disease                                                  | rs34592089  |
| 4   | 103.0542 | Alzheimer disease and age of onset                               | rs115641191 |
| 4   | 103.1469 | Schizophrenia                                                    | rs35518360  |
| 4   | 103.1887 | Blood pressure                                                   | rs13107325  |
| 4   | 103.1887 | Diastolic blood pressure                                         | rs13107325  |
| 4   | 103.1887 | Systolic blood pressure                                          | rs13107325  |
| 4   | 103.1887 | Hypertension                                                     | rs13107325  |
| 4   | 103.1887 | HDL cholesterol                                                  | rs13107325  |
| 4   | 103.1887 | Body mass index                                                  | rs13107325  |
| 4   | 103.1887 | Schizophrenia                                                    | rs13107325  |
| 4   | 103.1887 | NT-proBNP levels in acute coronary syndrome                      | rs13107325  |
| 4   | 103.1887 | Childhood body mass index                                        | rs13107325  |
| 4   | 103.1981 | HDL cholesterol                                                  | rs13135092  |
| 4   | 103.2048 | Sitting height ratio                                             | rs233817    |
| 4   | 103.2557 | Erythrocyte cadmium concentration in never smokers               | rs7664683   |
| 4   | 103.3497 | Homeostasis model assessment of beta-cell function (interaction) | rs6533014   |
| 4   | 103.4343 | Ulcerative colitis                                               | rs3774937   |

## GWAS Catalog SNPs in Region

| <b>chr</b> | <b>pos (Mb)</b> | <b>trait</b>                        | <b>snp</b> |
|------------|-----------------|-------------------------------------|------------|
| 4          | 103.4574        | Schizophrenia (treatment resistant) | rs230529   |
| 4          | 103.5111        | Ulcerative colitis                  | rs3774959  |

# SWI\_T2star\_right\_pallidum

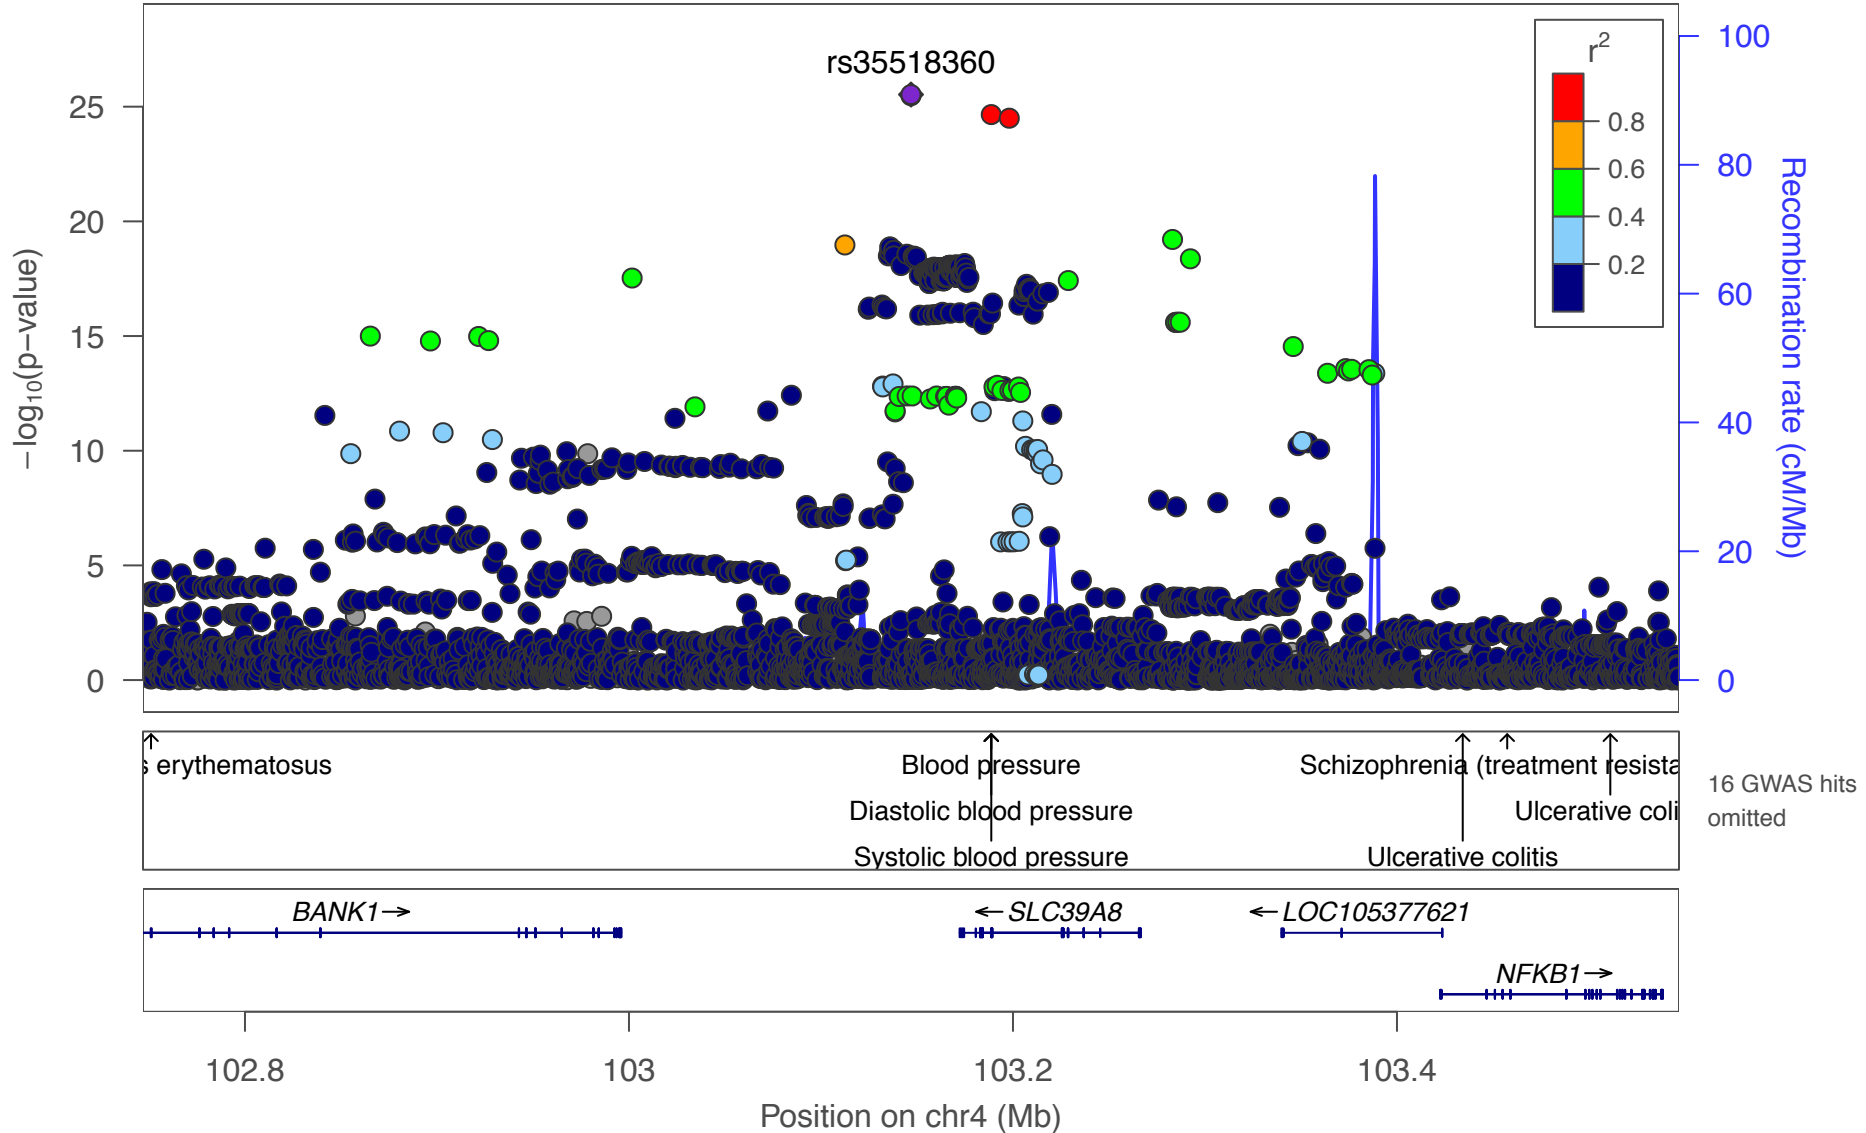

date: Thu Aug 17 18:09:15 2017

build: hg19

display range: chr4:102746890–103546890 [102746890–103546890]

hilite range: 0 – 0 [ 0 – 0 ]

reference SNP: chr4:103146890

number of SNPs plotted: 3536

min P.value: 2.96E–26 [chr4:103146890]

max P.value: 10E–1 [chr4:102941039]

omitted GWAS Hits: chr4:103.457418–Schizophrenia (treatment resistant), chr4:103.511114–Ulcerative colitis

omitted GWAS Hits: NA, NA

omitted GWAS Hits: NA

GWAS Catalog SNPs in Region

| chr | pos (Mb) | trait                                                            | snp         |
|-----|----------|------------------------------------------------------------------|-------------|
| 4   | 102.7511 | Systemic lupus erythematosus                                     | rs10516487  |
| 4   | 102.8416 | Schizophrenia                                                    | rs13119516  |
| 4   | 102.8653 | Crohn's disease                                                  | rs13126505  |
| 4   | 102.8653 | Inflammatory bowel disease                                       | rs13126505  |
| 4   | 102.9269 | Crohn's disease                                                  | rs34592089  |
| 4   | 103.0542 | Alzheimer disease and age of onset                               | rs115641191 |
| 4   | 103.1469 | Schizophrenia                                                    | rs35518360  |
| 4   | 103.1887 | Blood pressure                                                   | rs13107325  |
| 4   | 103.1887 | Diastolic blood pressure                                         | rs13107325  |
| 4   | 103.1887 | Systolic blood pressure                                          | rs13107325  |
| 4   | 103.1887 | Hypertension                                                     | rs13107325  |
| 4   | 103.1887 | HDL cholesterol                                                  | rs13107325  |
| 4   | 103.1887 | Body mass index                                                  | rs13107325  |
| 4   | 103.1887 | Schizophrenia                                                    | rs13107325  |
| 4   | 103.1887 | NT-proBNP levels in acute coronary syndrome                      | rs13107325  |
| 4   | 103.1887 | Childhood body mass index                                        | rs13107325  |
| 4   | 103.1981 | HDL cholesterol                                                  | rs13135092  |
| 4   | 103.2048 | Sitting height ratio                                             | rs233817    |
| 4   | 103.2557 | Erythrocyte cadmium concentration in never smokers               | rs7664683   |
| 4   | 103.3497 | Homeostasis model assessment of beta-cell function (interaction) | rs6533014   |
| 4   | 103.4343 | Ulcerative colitis                                               | rs3774937   |

## GWAS Catalog SNPs in Region

| <b>chr</b> | <b>pos (Mb)</b> | <b>trait</b>                        | <b>snp</b> |
|------------|-----------------|-------------------------------------|------------|
| 4          | 103.4574        | Schizophrenia (treatment resistant) | rs230529   |
| 4          | 103.5111        | Ulcerative colitis                  | rs3774959  |



# FAST\_ROIs\_L\_putamen

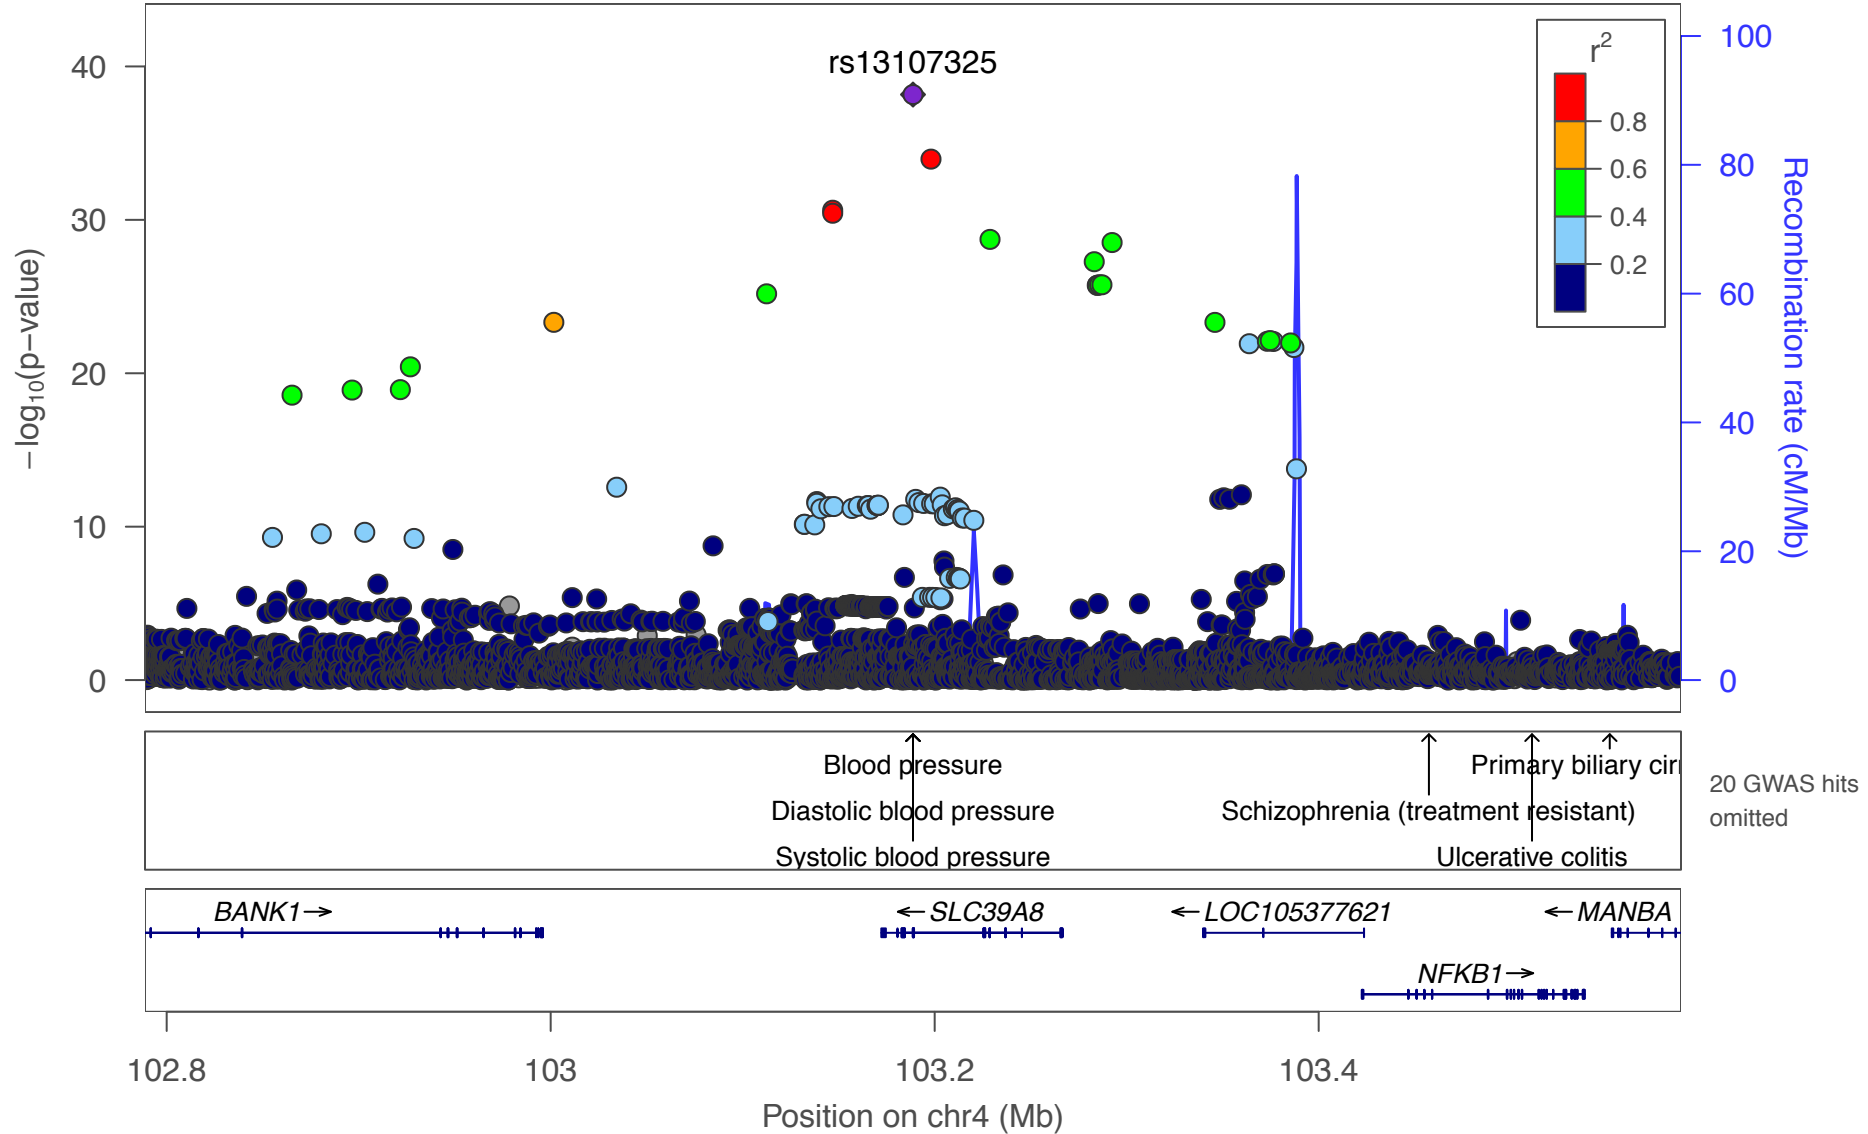

date: Thu Aug 17 18:01:59 2017

build: hg19

display range: chr4:102788709–103588709 [102788709–103588709]

hilite range: 0 – 0 [ 0 – 0 ]

reference SNP: chr4:103188709

number of SNPs plotted: 3534

min P.value: 6.79E–39 [chr4:103188709]

max P.value: 9.96E–1 [chr4:103346519]

omitted GWAS Hits: chr4:103.551603–Primary biliary cirrhosis, chr4:103.457418–Schizophrenia (treatment resistan

omitted GWAS Hits: NA, NA

GWAS Catalog SNPs in Region

| chr | pos (Mb) | trait                                                            | snp         |
|-----|----------|------------------------------------------------------------------|-------------|
| 4   | 102.8416 | Schizophrenia                                                    | rs13119516  |
| 4   | 102.8653 | Crohn's disease                                                  | rs13126505  |
| 4   | 102.8653 | Inflammatory bowel disease                                       | rs13126505  |
| 4   | 102.9269 | Crohn's disease                                                  | rs34592089  |
| 4   | 103.0542 | Alzheimer disease and age of onset                               | rs115641191 |
| 4   | 103.1469 | Schizophrenia                                                    | rs35518360  |
| 4   | 103.1887 | Blood pressure                                                   | rs13107325  |
| 4   | 103.1887 | Diastolic blood pressure                                         | rs13107325  |
| 4   | 103.1887 | Systolic blood pressure                                          | rs13107325  |
| 4   | 103.1887 | Hypertension                                                     | rs13107325  |
| 4   | 103.1887 | HDL cholesterol                                                  | rs13107325  |
| 4   | 103.1887 | Body mass index                                                  | rs13107325  |
| 4   | 103.1887 | Schizophrenia                                                    | rs13107325  |
| 4   | 103.1887 | NT-proBNP levels in acute coronary syndrome                      | rs13107325  |
| 4   | 103.1887 | Childhood body mass index                                        | rs13107325  |
| 4   | 103.1981 | HDL cholesterol                                                  | rs13135092  |
| 4   | 103.2048 | Sitting height ratio                                             | rs233817    |
| 4   | 103.2557 | Erythrocyte cadmium concentration in never smokers               | rs7664683   |
| 4   | 103.3497 | Homeostasis model assessment of beta-cell function (interaction) | rs6533014   |
| 4   | 103.4343 | Ulcerative colitis                                               | rs3774937   |
| 4   | 103.4574 | Schizophrenia (treatment resistant)                              | rs230529    |

## GWAS Catalog SNPs in Region

| <b>chr</b> | <b>pos (Mb)</b> | <b>trait</b>                            | <b>snp</b> |
|------------|-----------------|-----------------------------------------|------------|
| 4          | 103.5111        | Ulcerative colitis                      | rs3774959  |
| 4          | 103.5516        | Primary biliary cirrhosis               | rs7665090  |
| 4          | 103.5527        | Primary biliary cirrhosis               | rs1054037  |
| 4          | 103.5617        | Glomerular filtration rate (creatinine) | rs228611   |
| 4          | 103.5786        | Multiple sclerosis                      | rs228614   |

# FAST\_ROIs\_R\_putamen

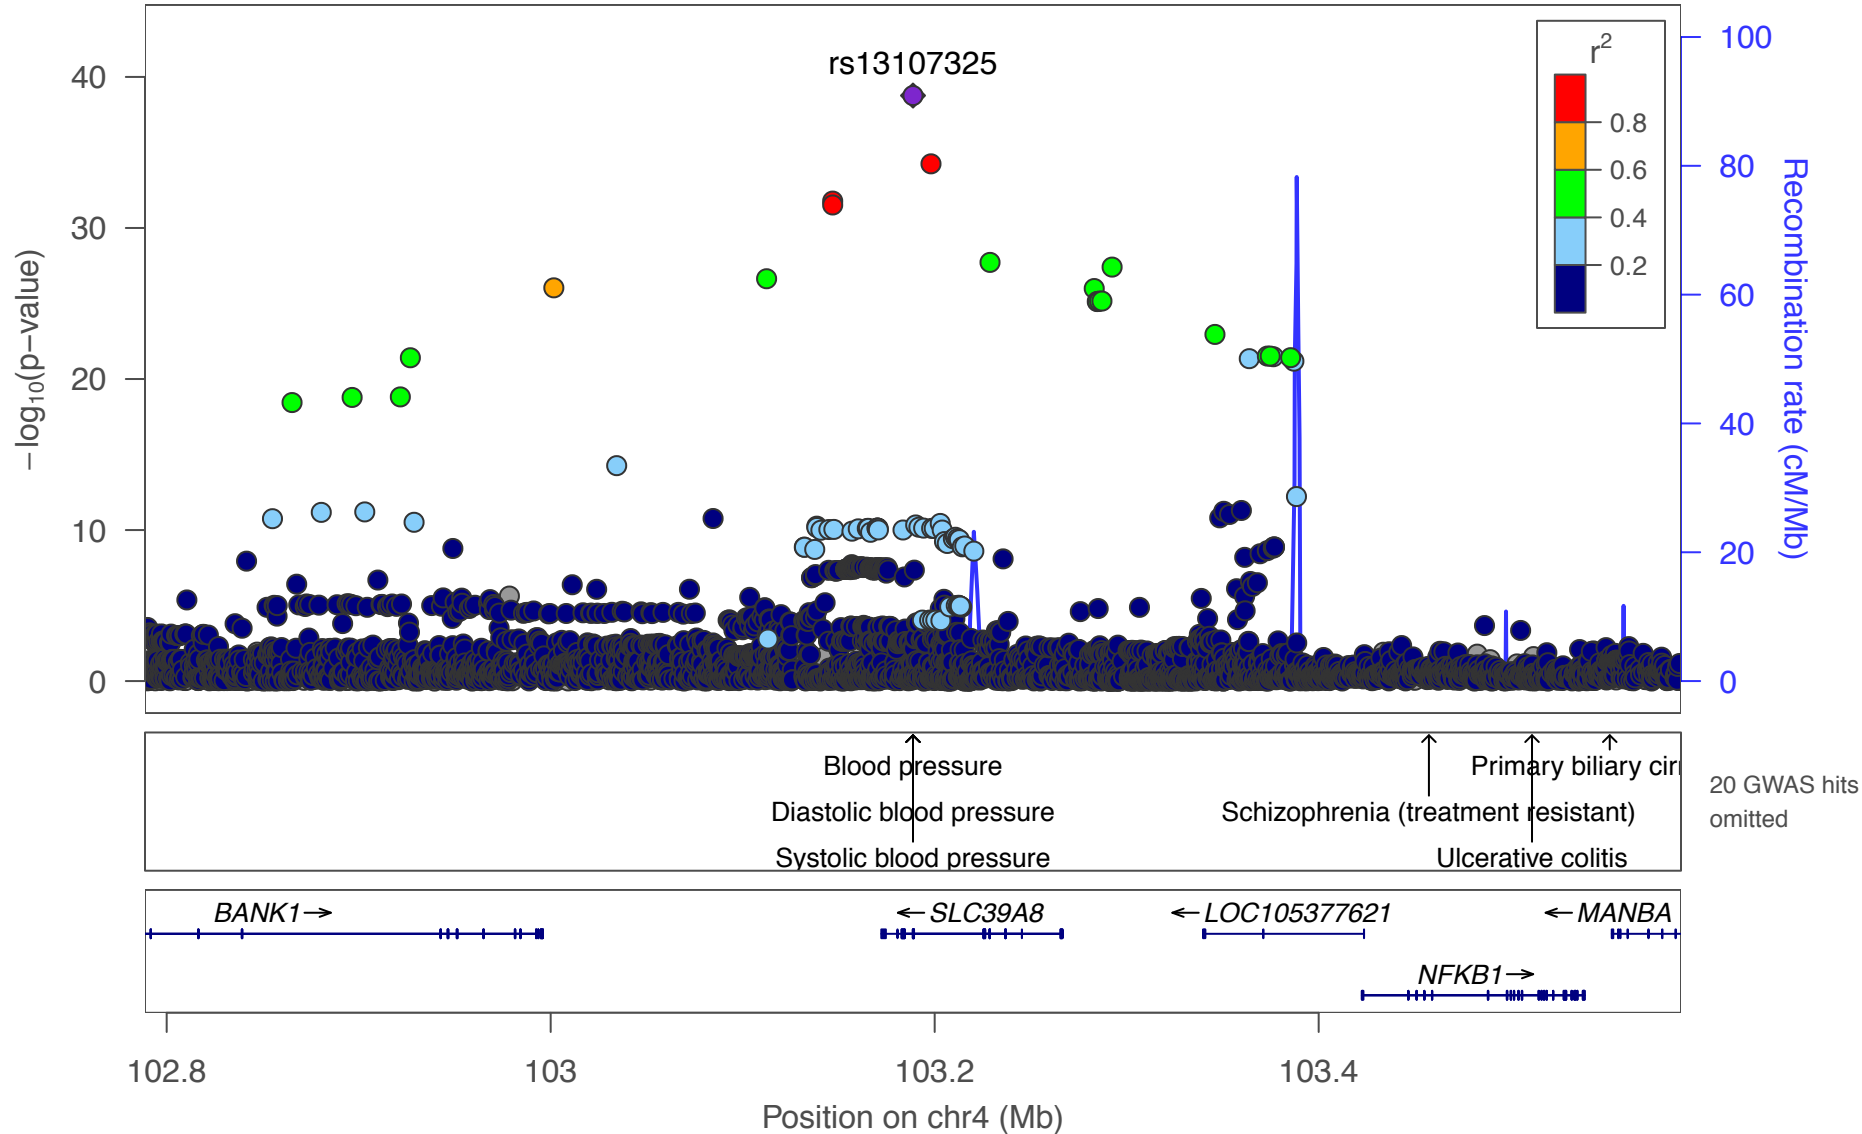

date: Thu Aug 17 18:01:59 2017

build: hg19

display range: chr4:102788709–103588709 [102788709–103588709]

hilite range: 0 – 0 [ 0 – 0 ]

reference SNP: chr4:103188709

number of SNPs plotted: 3534

min P.value: 1.71E–39 [chr4:103188709]

max P.value: 10E–1 [chr4:103194366]

omitted GWAS Hits: chr4:103.551603–Primary biliary cirrhosis, chr4:103.457418–Schizophrenia (treatment resistan

omitted GWAS Hits: NA, NA

GWAS Catalog SNPs in Region

| chr | pos (Mb) | trait                                                            | snp         |
|-----|----------|------------------------------------------------------------------|-------------|
| 4   | 102.8416 | Schizophrenia                                                    | rs13119516  |
| 4   | 102.8653 | Crohn's disease                                                  | rs13126505  |
| 4   | 102.8653 | Inflammatory bowel disease                                       | rs13126505  |
| 4   | 102.9269 | Crohn's disease                                                  | rs34592089  |
| 4   | 103.0542 | Alzheimer disease and age of onset                               | rs115641191 |
| 4   | 103.1469 | Schizophrenia                                                    | rs35518360  |
| 4   | 103.1887 | Blood pressure                                                   | rs13107325  |
| 4   | 103.1887 | Diastolic blood pressure                                         | rs13107325  |
| 4   | 103.1887 | Systolic blood pressure                                          | rs13107325  |
| 4   | 103.1887 | Hypertension                                                     | rs13107325  |
| 4   | 103.1887 | HDL cholesterol                                                  | rs13107325  |
| 4   | 103.1887 | Body mass index                                                  | rs13107325  |
| 4   | 103.1887 | Schizophrenia                                                    | rs13107325  |
| 4   | 103.1887 | NT-proBNP levels in acute coronary syndrome                      | rs13107325  |
| 4   | 103.1887 | Childhood body mass index                                        | rs13107325  |
| 4   | 103.1981 | HDL cholesterol                                                  | rs13135092  |
| 4   | 103.2048 | Sitting height ratio                                             | rs233817    |
| 4   | 103.2557 | Erythrocyte cadmium concentration in never smokers               | rs7664683   |
| 4   | 103.3497 | Homeostasis model assessment of beta-cell function (interaction) | rs6533014   |
| 4   | 103.4343 | Ulcerative colitis                                               | rs3774937   |
| 4   | 103.4574 | Schizophrenia (treatment resistant)                              | rs230529    |

## GWAS Catalog SNPs in Region

| <b>chr</b> | <b>pos (Mb)</b> | <b>trait</b>                            | <b>snp</b> |
|------------|-----------------|-----------------------------------------|------------|
| 4          | 103.5111        | Ulcerative colitis                      | rs3774959  |
| 4          | 103.5516        | Primary biliary cirrhosis               | rs7665090  |
| 4          | 103.5527        | Primary biliary cirrhosis               | rs1054037  |
| 4          | 103.5617        | Glomerular filtration rate (creatinine) | rs228611   |
| 4          | 103.5786        | Multiple sclerosis                      | rs228614   |



# FAST\_ROIs\_L\_ventral\_striatum

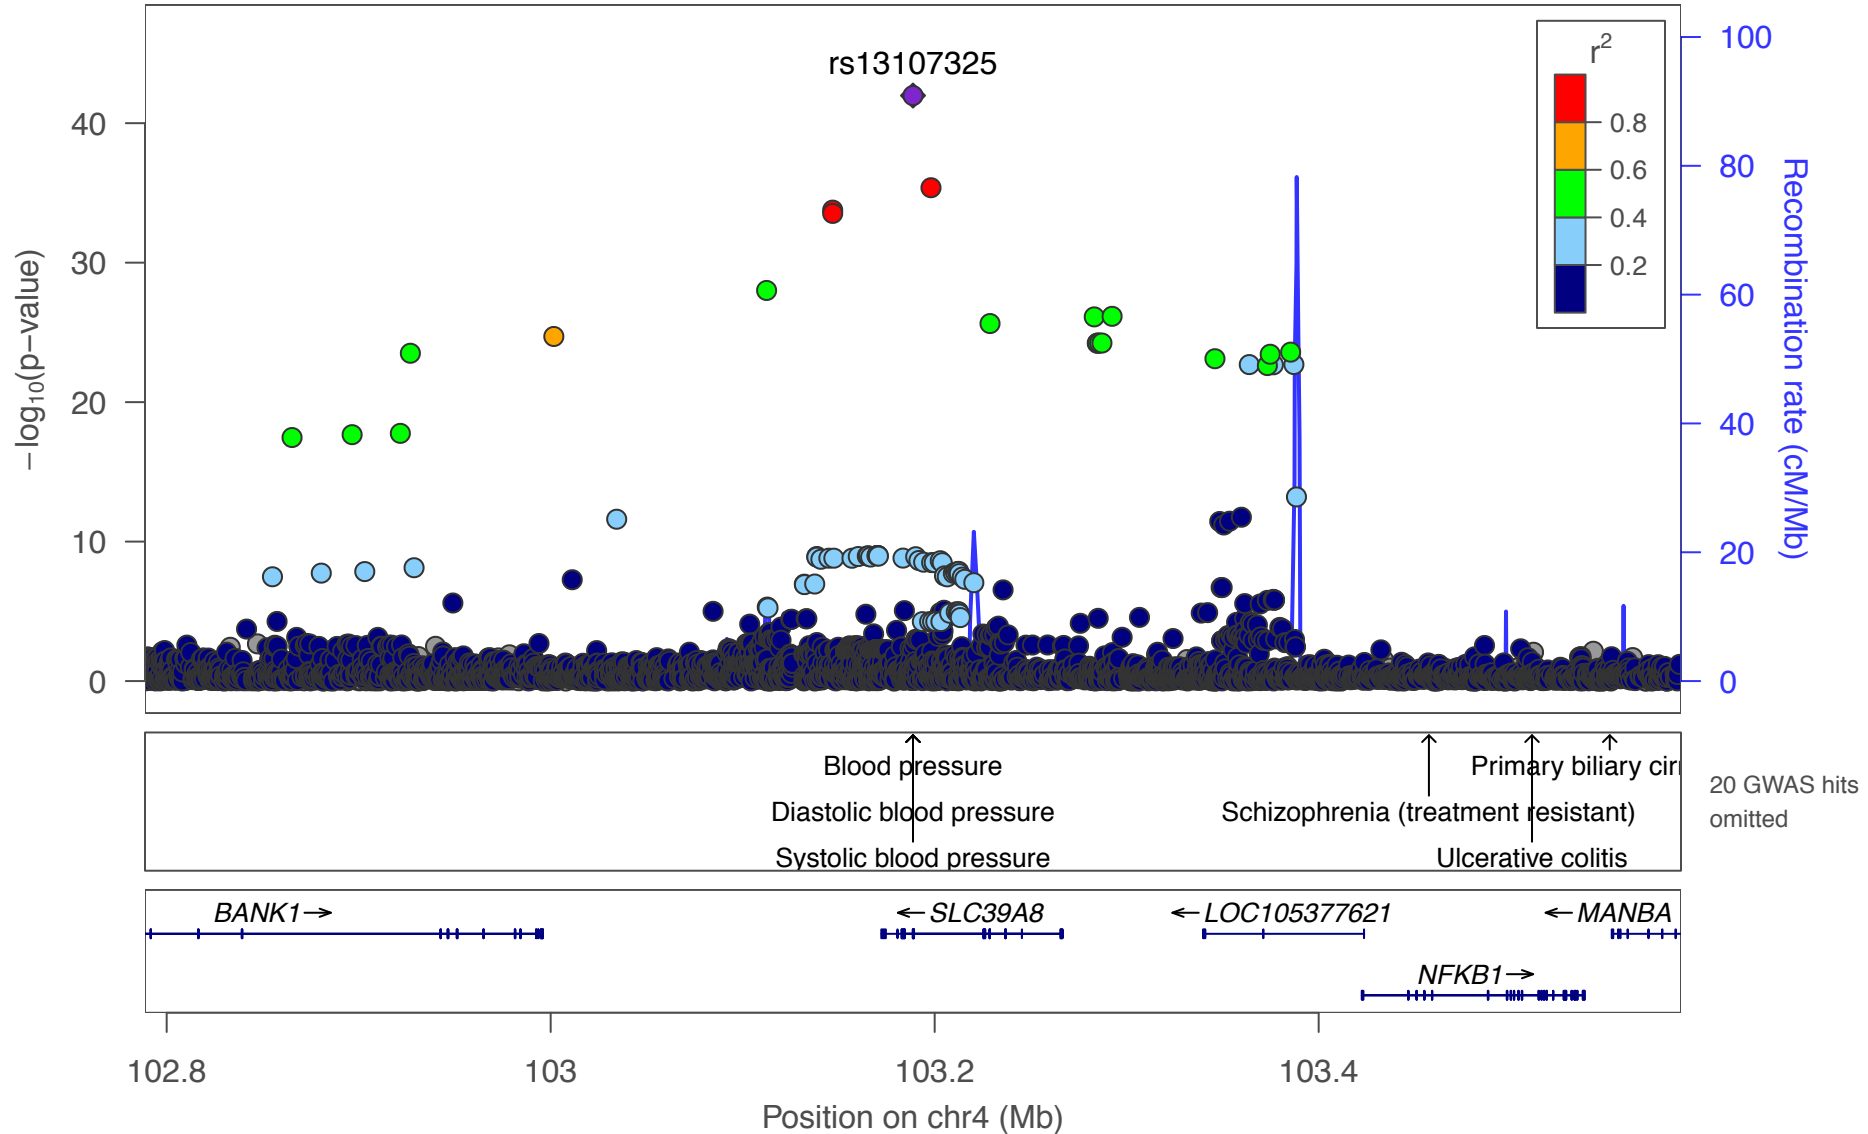

date: Thu Aug 17 18:01:59 2017

build: hg19

display range: chr4:102788709–103588709 [102788709–103588709]

hilite range: 0 – 0 [ 0 – 0 ]

reference SNP: chr4:103188709

number of SNPs plotted: 3534

min P.value: 1.04E–42 [chr4:103188709]

max P.value: 9.99E–1 [chr4:103178948]

omitted GWAS Hits: chr4:103.551603–Primary biliary cirrhosis, chr4:103.457418–Schizophrenia (treatment resistan

omitted GWAS Hits: NA, NA

GWAS Catalog SNPs in Region

| chr | pos (Mb) | trait                                                            | snp         |
|-----|----------|------------------------------------------------------------------|-------------|
| 4   | 102.8416 | Schizophrenia                                                    | rs13119516  |
| 4   | 102.8653 | Crohn's disease                                                  | rs13126505  |
| 4   | 102.8653 | Inflammatory bowel disease                                       | rs13126505  |
| 4   | 102.9269 | Crohn's disease                                                  | rs34592089  |
| 4   | 103.0542 | Alzheimer disease and age of onset                               | rs115641191 |
| 4   | 103.1469 | Schizophrenia                                                    | rs35518360  |
| 4   | 103.1887 | Blood pressure                                                   | rs13107325  |
| 4   | 103.1887 | Diastolic blood pressure                                         | rs13107325  |
| 4   | 103.1887 | Systolic blood pressure                                          | rs13107325  |
| 4   | 103.1887 | Hypertension                                                     | rs13107325  |
| 4   | 103.1887 | HDL cholesterol                                                  | rs13107325  |
| 4   | 103.1887 | Body mass index                                                  | rs13107325  |
| 4   | 103.1887 | Schizophrenia                                                    | rs13107325  |
| 4   | 103.1887 | NT-proBNP levels in acute coronary syndrome                      | rs13107325  |
| 4   | 103.1887 | Childhood body mass index                                        | rs13107325  |
| 4   | 103.1981 | HDL cholesterol                                                  | rs13135092  |
| 4   | 103.2048 | Sitting height ratio                                             | rs233817    |
| 4   | 103.2557 | Erythrocyte cadmium concentration in never smokers               | rs7664683   |
| 4   | 103.3497 | Homeostasis model assessment of beta-cell function (interaction) | rs6533014   |
| 4   | 103.4343 | Ulcerative colitis                                               | rs3774937   |
| 4   | 103.4574 | Schizophrenia (treatment resistant)                              | rs230529    |

## GWAS Catalog SNPs in Region

| <b>chr</b> | <b>pos (Mb)</b> | <b>trait</b>                            | <b>snp</b> |
|------------|-----------------|-----------------------------------------|------------|
| 4          | 103.5111        | Ulcerative colitis                      | rs3774959  |
| 4          | 103.5516        | Primary biliary cirrhosis               | rs7665090  |
| 4          | 103.5527        | Primary biliary cirrhosis               | rs1054037  |
| 4          | 103.5617        | Glomerular filtration rate (creatinine) | rs228611   |
| 4          | 103.5786        | Multiple sclerosis                      | rs228614   |

# FAST\_ROIs\_R\_ventral\_striatum

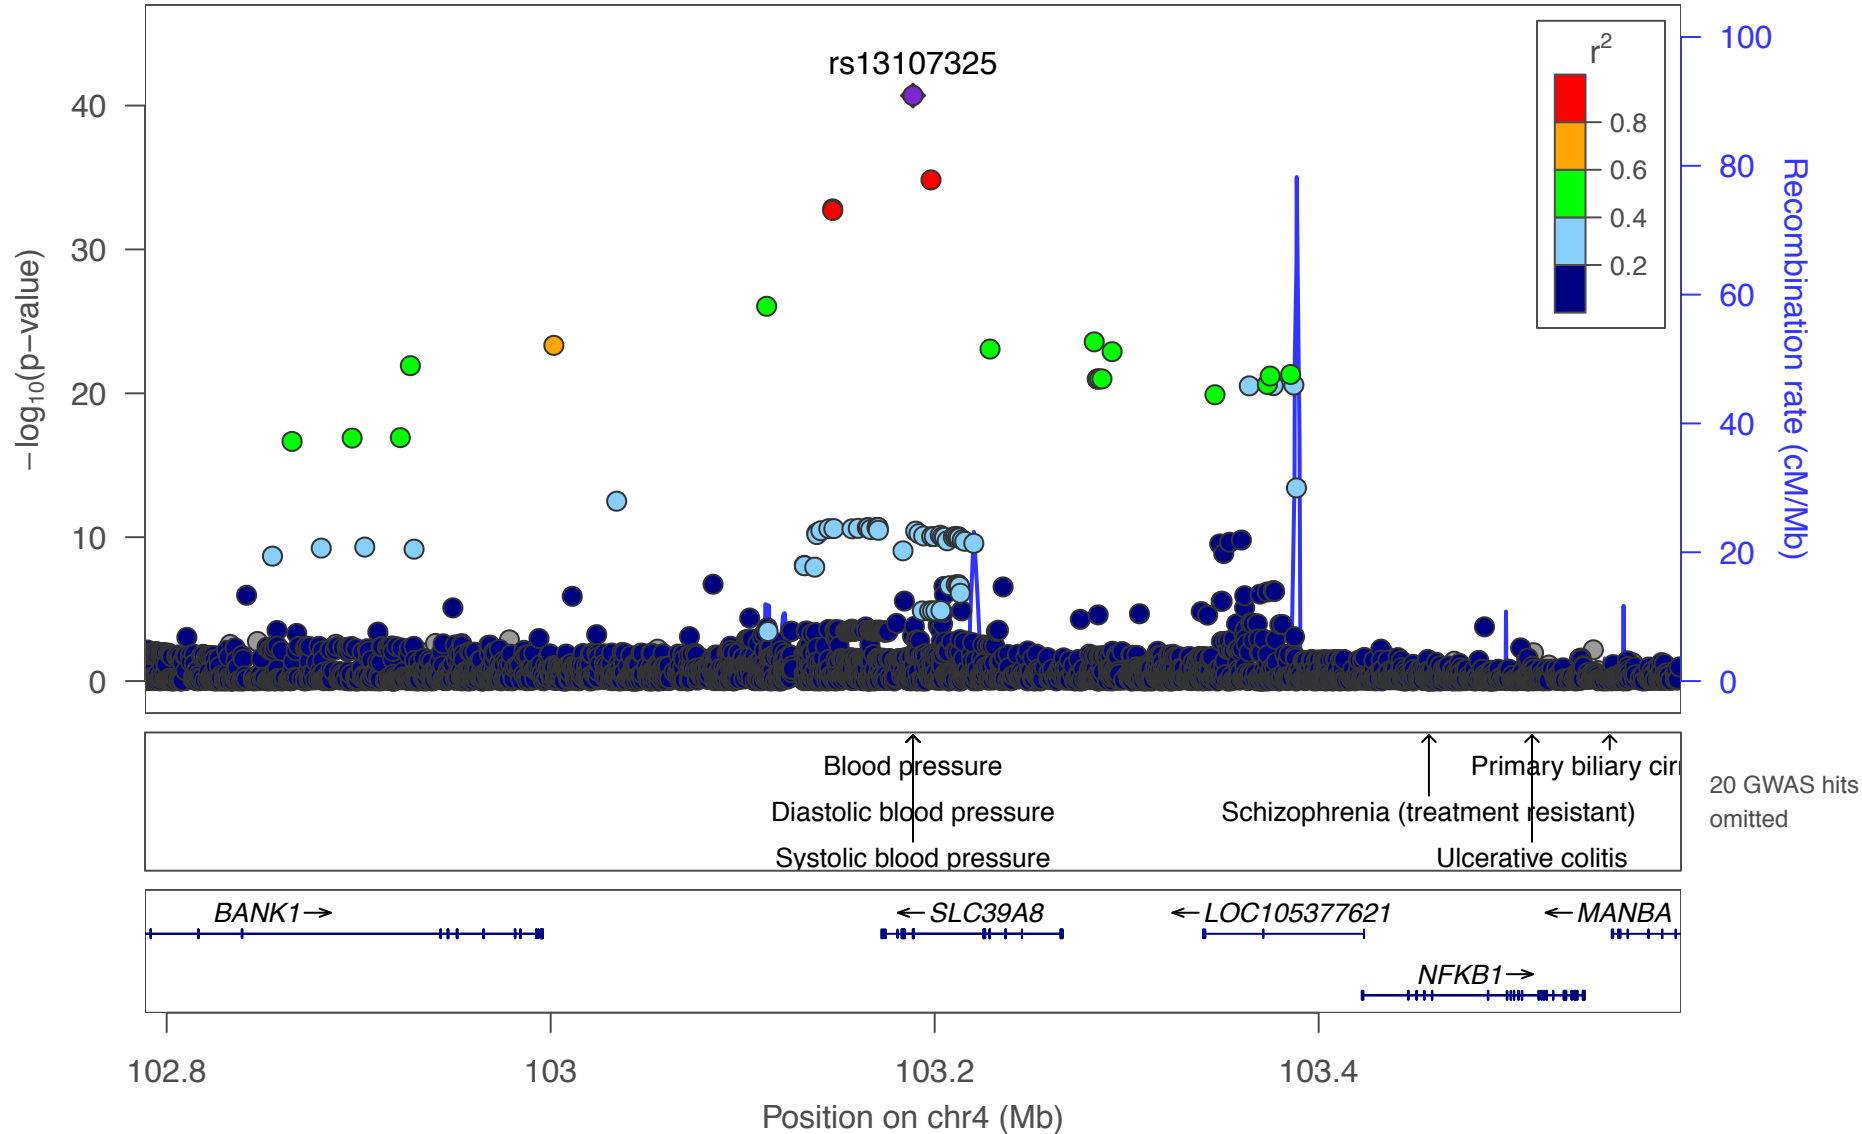

date: Thu Aug 17 18:01:59 2017

build: hg19

display range: chr4:102788709–103588709 [102788709–103588709]

hilite range: 0 – 0 [ 0 – 0 ]

reference SNP: chr4:103188709

number of SNPs plotted: 3534

min P.value: 2.01E–41 [chr4:103188709]

max P.value: 9.99E–1 [chr4:103457585]

omitted GWAS Hits: chr4:103.551603–Primary biliary cirrhosis, chr4:103.457418–Schizophrenia (treatment resistan

omitted GWAS Hits: NA, NA

GWAS Catalog SNPs in Region

| chr | pos (Mb) | trait                                                            | snp         |
|-----|----------|------------------------------------------------------------------|-------------|
| 4   | 102.8416 | Schizophrenia                                                    | rs13119516  |
| 4   | 102.8653 | Crohn's disease                                                  | rs13126505  |
| 4   | 102.8653 | Inflammatory bowel disease                                       | rs13126505  |
| 4   | 102.9269 | Crohn's disease                                                  | rs34592089  |
| 4   | 103.0542 | Alzheimer disease and age of onset                               | rs115641191 |
| 4   | 103.1469 | Schizophrenia                                                    | rs35518360  |
| 4   | 103.1887 | Blood pressure                                                   | rs13107325  |
| 4   | 103.1887 | Diastolic blood pressure                                         | rs13107325  |
| 4   | 103.1887 | Systolic blood pressure                                          | rs13107325  |
| 4   | 103.1887 | Hypertension                                                     | rs13107325  |
| 4   | 103.1887 | HDL cholesterol                                                  | rs13107325  |
| 4   | 103.1887 | Body mass index                                                  | rs13107325  |
| 4   | 103.1887 | Schizophrenia                                                    | rs13107325  |
| 4   | 103.1887 | NT-proBNP levels in acute coronary syndrome                      | rs13107325  |
| 4   | 103.1887 | Childhood body mass index                                        | rs13107325  |
| 4   | 103.1981 | HDL cholesterol                                                  | rs13135092  |
| 4   | 103.2048 | Sitting height ratio                                             | rs233817    |
| 4   | 103.2557 | Erythrocyte cadmium concentration in never smokers               | rs7664683   |
| 4   | 103.3497 | Homeostasis model assessment of beta-cell function (interaction) | rs6533014   |
| 4   | 103.4343 | Ulcerative colitis                                               | rs3774937   |
| 4   | 103.4574 | Schizophrenia (treatment resistant)                              | rs230529    |

## GWAS Catalog SNPs in Region

| <b>chr</b> | <b>pos (Mb)</b> | <b>trait</b>                            | <b>snp</b> |
|------------|-----------------|-----------------------------------------|------------|
| 4          | 103.5111        | Ulcerative colitis                      | rs3774959  |
| 4          | 103.5516        | Primary biliary cirrhosis               | rs7665090  |
| 4          | 103.5527        | Primary biliary cirrhosis               | rs1054037  |
| 4          | 103.5617        | Glomerular filtration rate (creatinine) | rs228611   |
| 4          | 103.5786        | Multiple sclerosis                      | rs228614   |



# FAST\_ROIs\_R\_cerebellum\_VIIIb

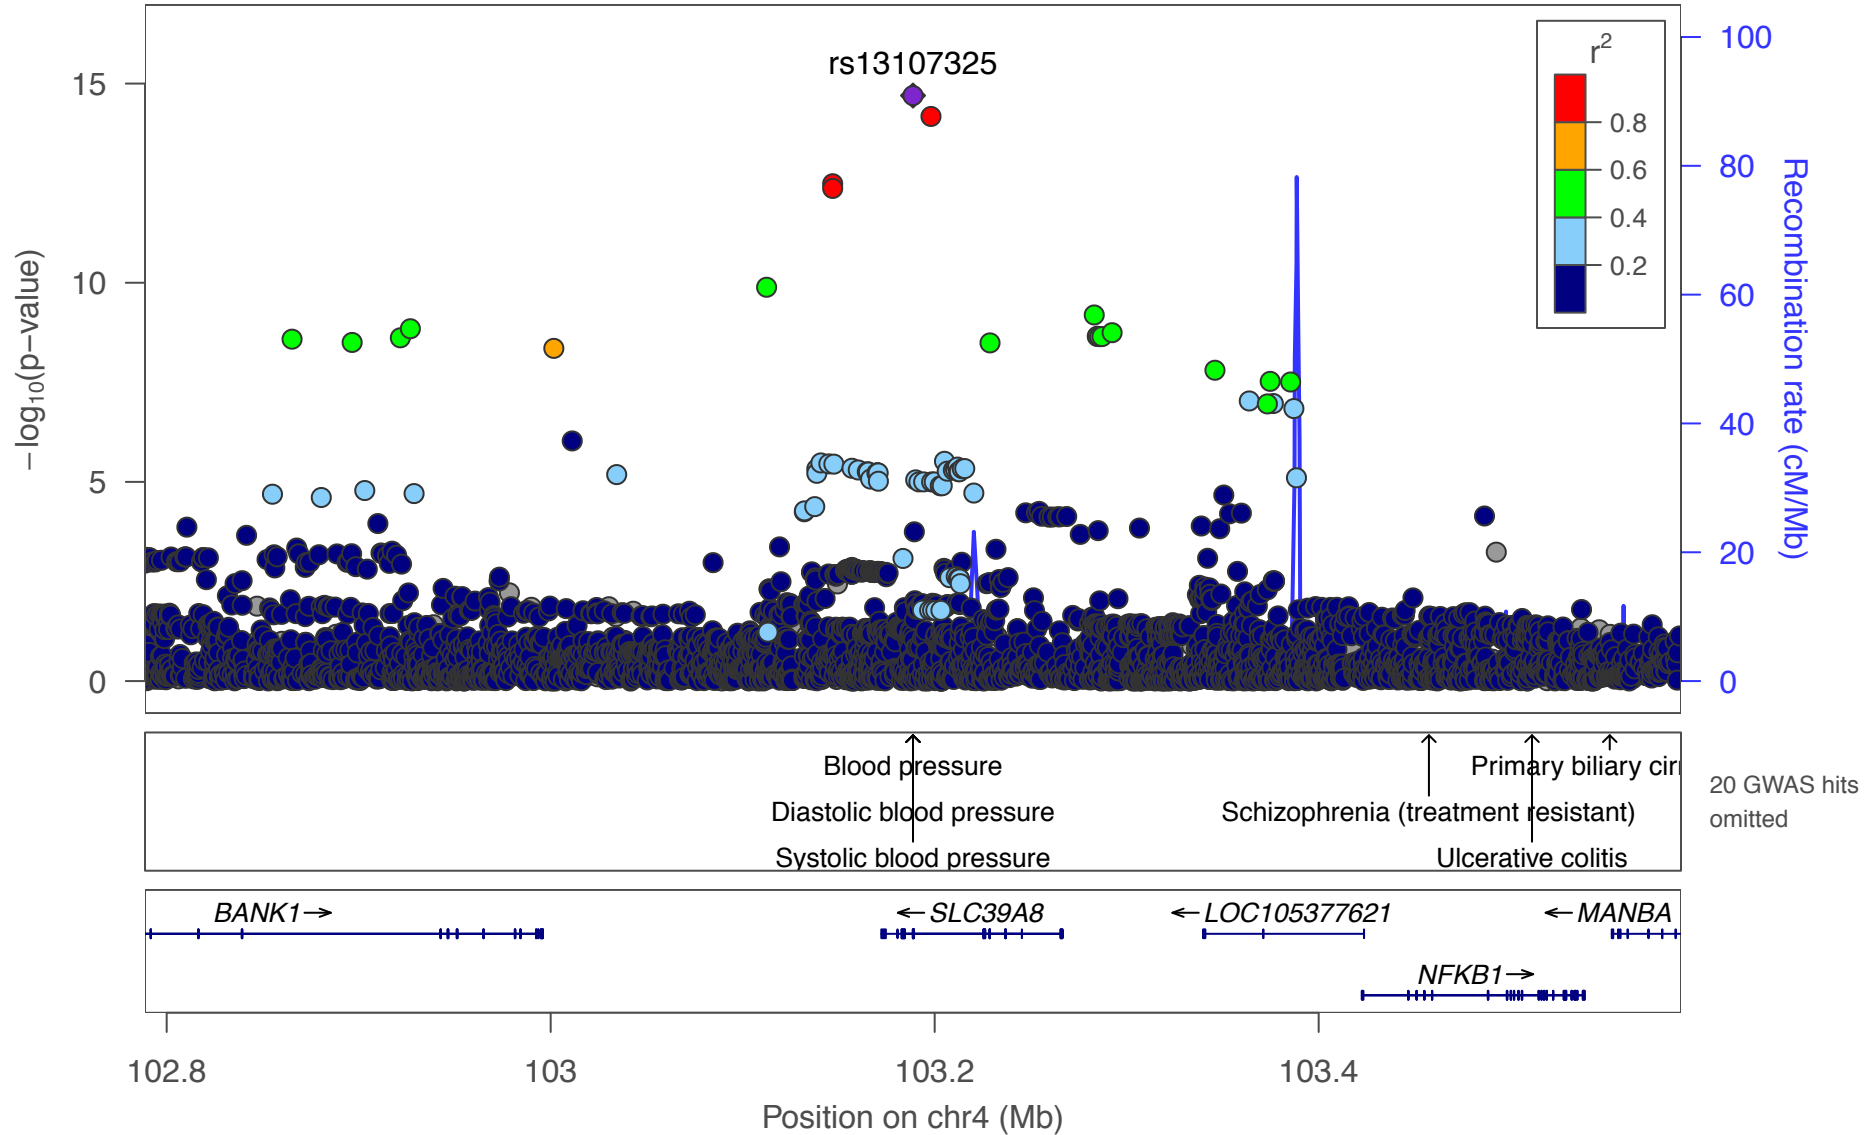

date: Thu Aug 17 18:01:59 2017

build: hg19

display range: chr4:102788709–103588709 [102788709–103588709]

hilite range: 0 – 0 [ 0 – 0 ]

reference SNP: chr4:103188709

number of SNPs plotted: 3534

min P.value: 2E–15 [chr4:103188709]

max P.value: 9.99E–1 [chr4:103203467]

omitted GWAS Hits: chr4:103.551603–Primary biliary cirrhosis, chr4:103.457418–Schizophrenia (treatment resistan

omitted GWAS Hits: NA, NA

GWAS Catalog SNPs in Region

| chr | pos (Mb) | trait                                                            | snp         |
|-----|----------|------------------------------------------------------------------|-------------|
| 4   | 102.8416 | Schizophrenia                                                    | rs13119516  |
| 4   | 102.8653 | Crohn's disease                                                  | rs13126505  |
| 4   | 102.8653 | Inflammatory bowel disease                                       | rs13126505  |
| 4   | 102.9269 | Crohn's disease                                                  | rs34592089  |
| 4   | 103.0542 | Alzheimer disease and age of onset                               | rs115641191 |
| 4   | 103.1469 | Schizophrenia                                                    | rs35518360  |
| 4   | 103.1887 | Blood pressure                                                   | rs13107325  |
| 4   | 103.1887 | Diastolic blood pressure                                         | rs13107325  |
| 4   | 103.1887 | Systolic blood pressure                                          | rs13107325  |
| 4   | 103.1887 | Hypertension                                                     | rs13107325  |
| 4   | 103.1887 | HDL cholesterol                                                  | rs13107325  |
| 4   | 103.1887 | Body mass index                                                  | rs13107325  |
| 4   | 103.1887 | Schizophrenia                                                    | rs13107325  |
| 4   | 103.1887 | NT-proBNP levels in acute coronary syndrome                      | rs13107325  |
| 4   | 103.1887 | Childhood body mass index                                        | rs13107325  |
| 4   | 103.1981 | HDL cholesterol                                                  | rs13135092  |
| 4   | 103.2048 | Sitting height ratio                                             | rs233817    |
| 4   | 103.2557 | Erythrocyte cadmium concentration in never smokers               | rs7664683   |
| 4   | 103.3497 | Homeostasis model assessment of beta-cell function (interaction) | rs6533014   |
| 4   | 103.4343 | Ulcerative colitis                                               | rs3774937   |
| 4   | 103.4574 | Schizophrenia (treatment resistant)                              | rs230529    |

## GWAS Catalog SNPs in Region

| <b>chr</b> | <b>pos (Mb)</b> | <b>trait</b>                            | <b>snp</b> |
|------------|-----------------|-----------------------------------------|------------|
| 4          | 103.5111        | Ulcerative colitis                      | rs3774959  |
| 4          | 103.5516        | Primary biliary cirrhosis               | rs7665090  |
| 4          | 103.5527        | Primary biliary cirrhosis               | rs1054037  |
| 4          | 103.5617        | Glomerular filtration rate (creatinine) | rs228611   |
| 4          | 103.5786        | Multiple sclerosis                      | rs228614   |

# FAST\_ROIs\_V\_cerebellum\_IX

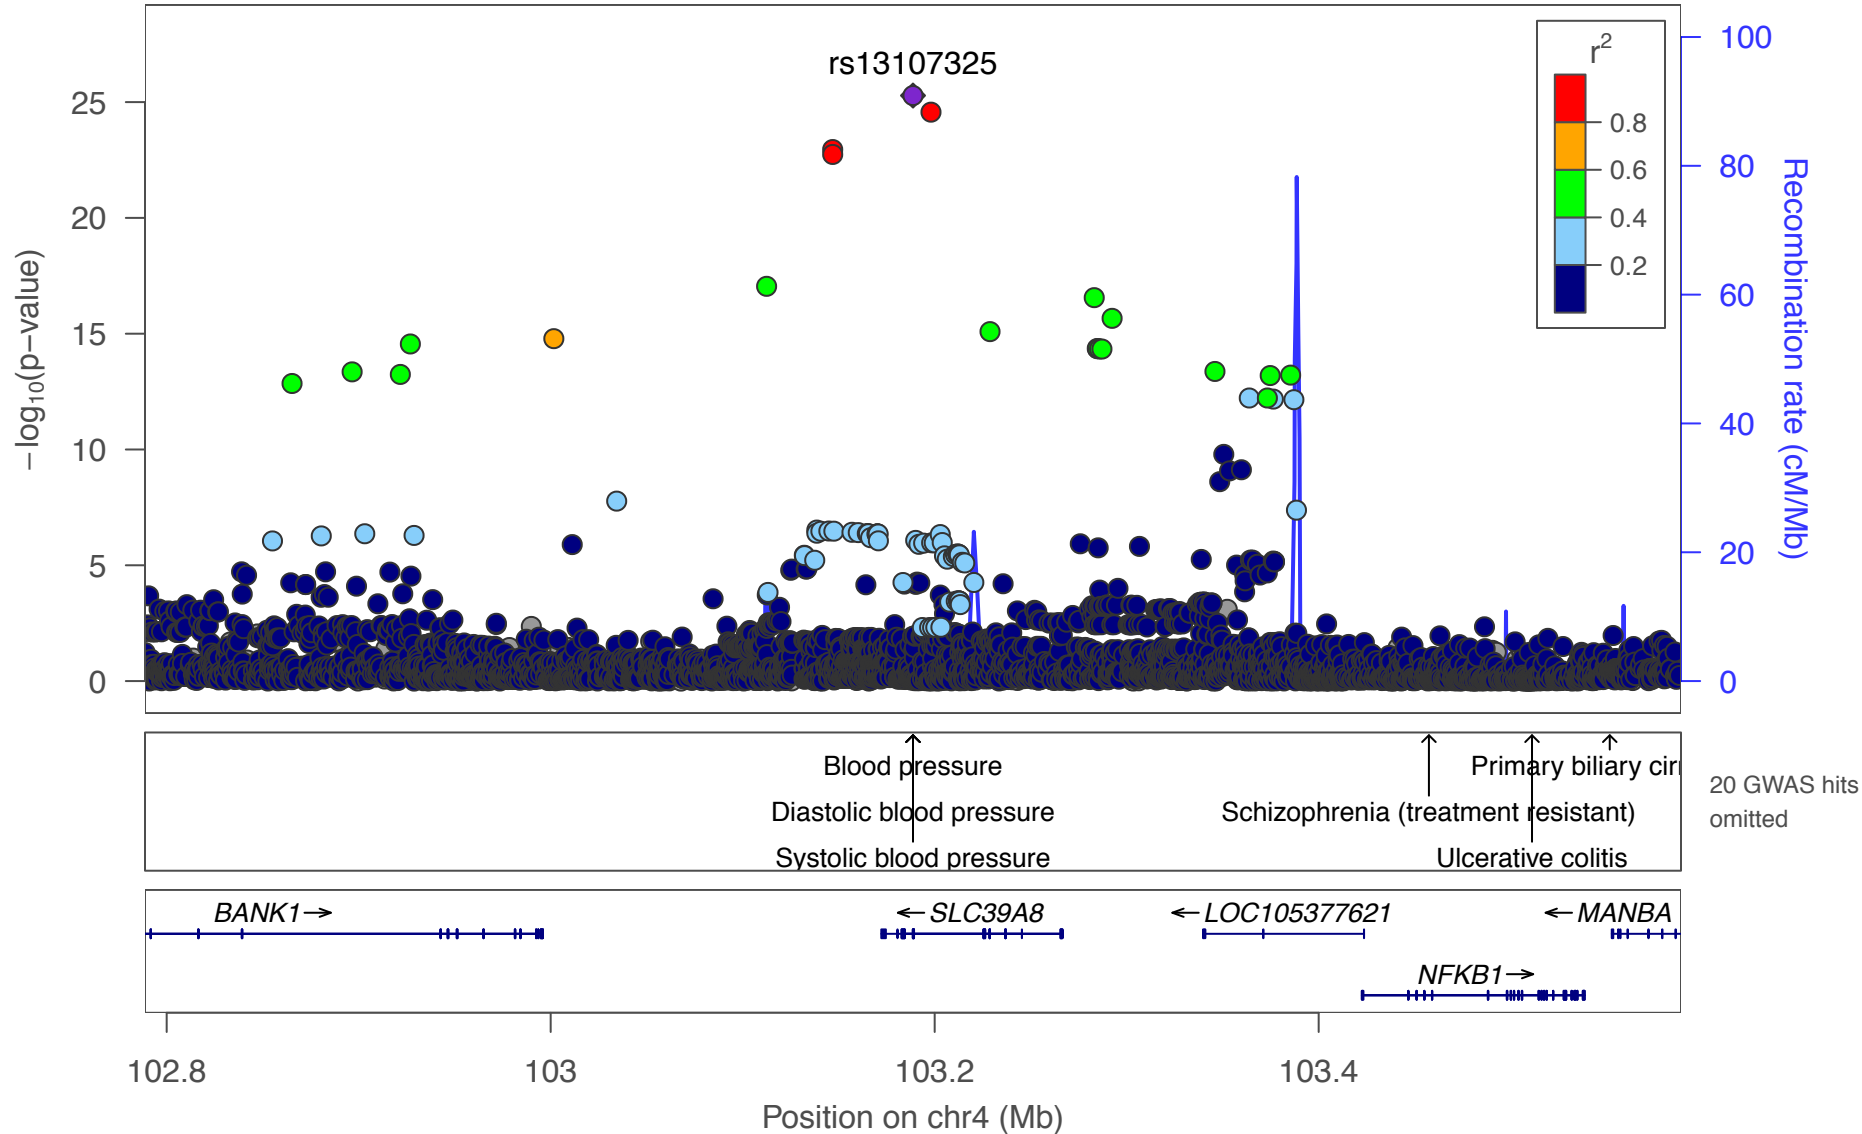

date: Thu Aug 17 18:01:59 2017

build: hg19

display range: chr4:102788709–103588709 [102788709–103588709]

hilite range: 0 – 0 [ 0 – 0 ]

reference SNP: chr4:103188709

number of SNPs plotted: 3534

min P.value: 5.21E–26 [chr4:103188709]

max P.value: 10E–1 [chr4:103507703]

omitted GWAS Hits: chr4:103.551603–Primary biliary cirrhosis, chr4:103.457418–Schizophrenia (treatment resistan

omitted GWAS Hits: NA, NA

GWAS Catalog SNPs in Region

| chr | pos (Mb) | trait                                                            | snp         |
|-----|----------|------------------------------------------------------------------|-------------|
| 4   | 102.8416 | Schizophrenia                                                    | rs13119516  |
| 4   | 102.8653 | Crohn's disease                                                  | rs13126505  |
| 4   | 102.8653 | Inflammatory bowel disease                                       | rs13126505  |
| 4   | 102.9269 | Crohn's disease                                                  | rs34592089  |
| 4   | 103.0542 | Alzheimer disease and age of onset                               | rs115641191 |
| 4   | 103.1469 | Schizophrenia                                                    | rs35518360  |
| 4   | 103.1887 | Blood pressure                                                   | rs13107325  |
| 4   | 103.1887 | Diastolic blood pressure                                         | rs13107325  |
| 4   | 103.1887 | Systolic blood pressure                                          | rs13107325  |
| 4   | 103.1887 | Hypertension                                                     | rs13107325  |
| 4   | 103.1887 | HDL cholesterol                                                  | rs13107325  |
| 4   | 103.1887 | Body mass index                                                  | rs13107325  |
| 4   | 103.1887 | Schizophrenia                                                    | rs13107325  |
| 4   | 103.1887 | NT-proBNP levels in acute coronary syndrome                      | rs13107325  |
| 4   | 103.1887 | Childhood body mass index                                        | rs13107325  |
| 4   | 103.1981 | HDL cholesterol                                                  | rs13135092  |
| 4   | 103.2048 | Sitting height ratio                                             | rs233817    |
| 4   | 103.2557 | Erythrocyte cadmium concentration in never smokers               | rs7664683   |
| 4   | 103.3497 | Homeostasis model assessment of beta-cell function (interaction) | rs6533014   |
| 4   | 103.4343 | Ulcerative colitis                                               | rs3774937   |
| 4   | 103.4574 | Schizophrenia (treatment resistant)                              | rs230529    |

## GWAS Catalog SNPs in Region

| <b>chr</b> | <b>pos (Mb)</b> | <b>trait</b>                            | <b>snp</b> |
|------------|-----------------|-----------------------------------------|------------|
| 4          | 103.5111        | Ulcerative colitis                      | rs3774959  |
| 4          | 103.5516        | Primary biliary cirrhosis               | rs7665090  |
| 4          | 103.5527        | Primary biliary cirrhosis               | rs1054037  |
| 4          | 103.5617        | Glomerular filtration rate (creatinine) | rs228611   |
| 4          | 103.5786        | Multiple sclerosis                      | rs228614   |



# FAST\_ROIs\_V\_cerebellum\_X

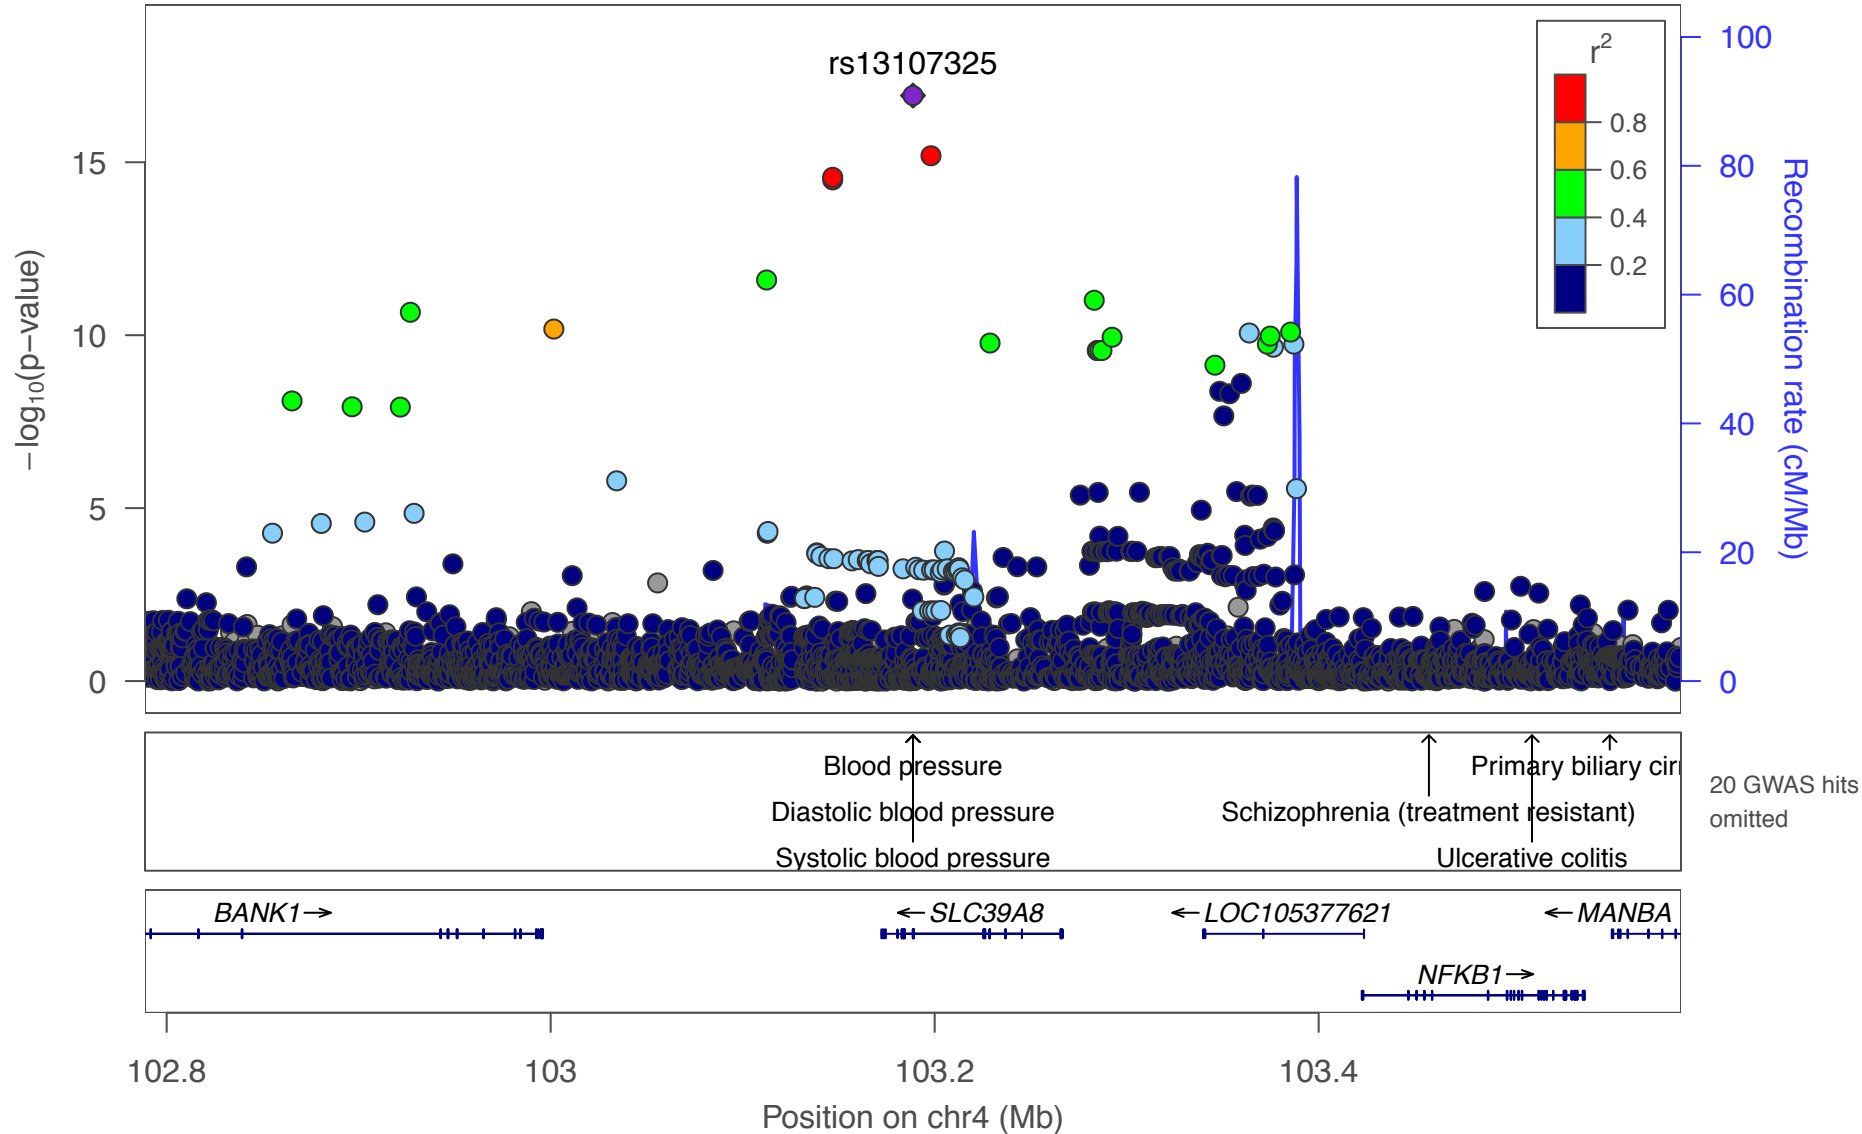

date: Thu Aug 17 18:01:59 2017

build: hg19

display range: chr4:102788709–103588709 [102788709–103588709]

hilite range: 0 – 0 [ 0 – 0 ]

reference SNP: chr4:103188709

number of SNPs plotted: 3534

min P.value: 1.18E–17 [chr4:103188709]

max P.value: 9.99E–1 [chr4:103322301]

omitted GWAS Hits: chr4:103.551603–Primary biliary cirrhosis, chr4:103.457418–Schizophrenia (treatment resistan

omitted GWAS Hits: NA, NA

GWAS Catalog SNPs in Region

| chr | pos (Mb) | trait                                                            | snp         |
|-----|----------|------------------------------------------------------------------|-------------|
| 4   | 102.8416 | Schizophrenia                                                    | rs13119516  |
| 4   | 102.8653 | Crohn's disease                                                  | rs13126505  |
| 4   | 102.8653 | Inflammatory bowel disease                                       | rs13126505  |
| 4   | 102.9269 | Crohn's disease                                                  | rs34592089  |
| 4   | 103.0542 | Alzheimer disease and age of onset                               | rs115641191 |
| 4   | 103.1469 | Schizophrenia                                                    | rs35518360  |
| 4   | 103.1887 | Blood pressure                                                   | rs13107325  |
| 4   | 103.1887 | Diastolic blood pressure                                         | rs13107325  |
| 4   | 103.1887 | Systolic blood pressure                                          | rs13107325  |
| 4   | 103.1887 | Hypertension                                                     | rs13107325  |
| 4   | 103.1887 | HDL cholesterol                                                  | rs13107325  |
| 4   | 103.1887 | Body mass index                                                  | rs13107325  |
| 4   | 103.1887 | Schizophrenia                                                    | rs13107325  |
| 4   | 103.1887 | NT-proBNP levels in acute coronary syndrome                      | rs13107325  |
| 4   | 103.1887 | Childhood body mass index                                        | rs13107325  |
| 4   | 103.1981 | HDL cholesterol                                                  | rs13135092  |
| 4   | 103.2048 | Sitting height ratio                                             | rs233817    |
| 4   | 103.2557 | Erythrocyte cadmium concentration in never smokers               | rs7664683   |
| 4   | 103.3497 | Homeostasis model assessment of beta-cell function (interaction) | rs6533014   |
| 4   | 103.4343 | Ulcerative colitis                                               | rs3774937   |
| 4   | 103.4574 | Schizophrenia (treatment resistant)                              | rs230529    |

## GWAS Catalog SNPs in Region

| <b>chr</b> | <b>pos (Mb)</b> | <b>trait</b>                            | <b>snp</b> |
|------------|-----------------|-----------------------------------------|------------|
| 4          | 103.5111        | Ulcerative colitis                      | rs3774959  |
| 4          | 103.5516        | Primary biliary cirrhosis               | rs7665090  |
| 4          | 103.5527        | Primary biliary cirrhosis               | rs1054037  |
| 4          | 103.5617        | Glomerular filtration rate (creatinine) | rs228611   |
| 4          | 103.5786        | Multiple sclerosis                      | rs228614   |

# volume\_Left-Accumbens-area

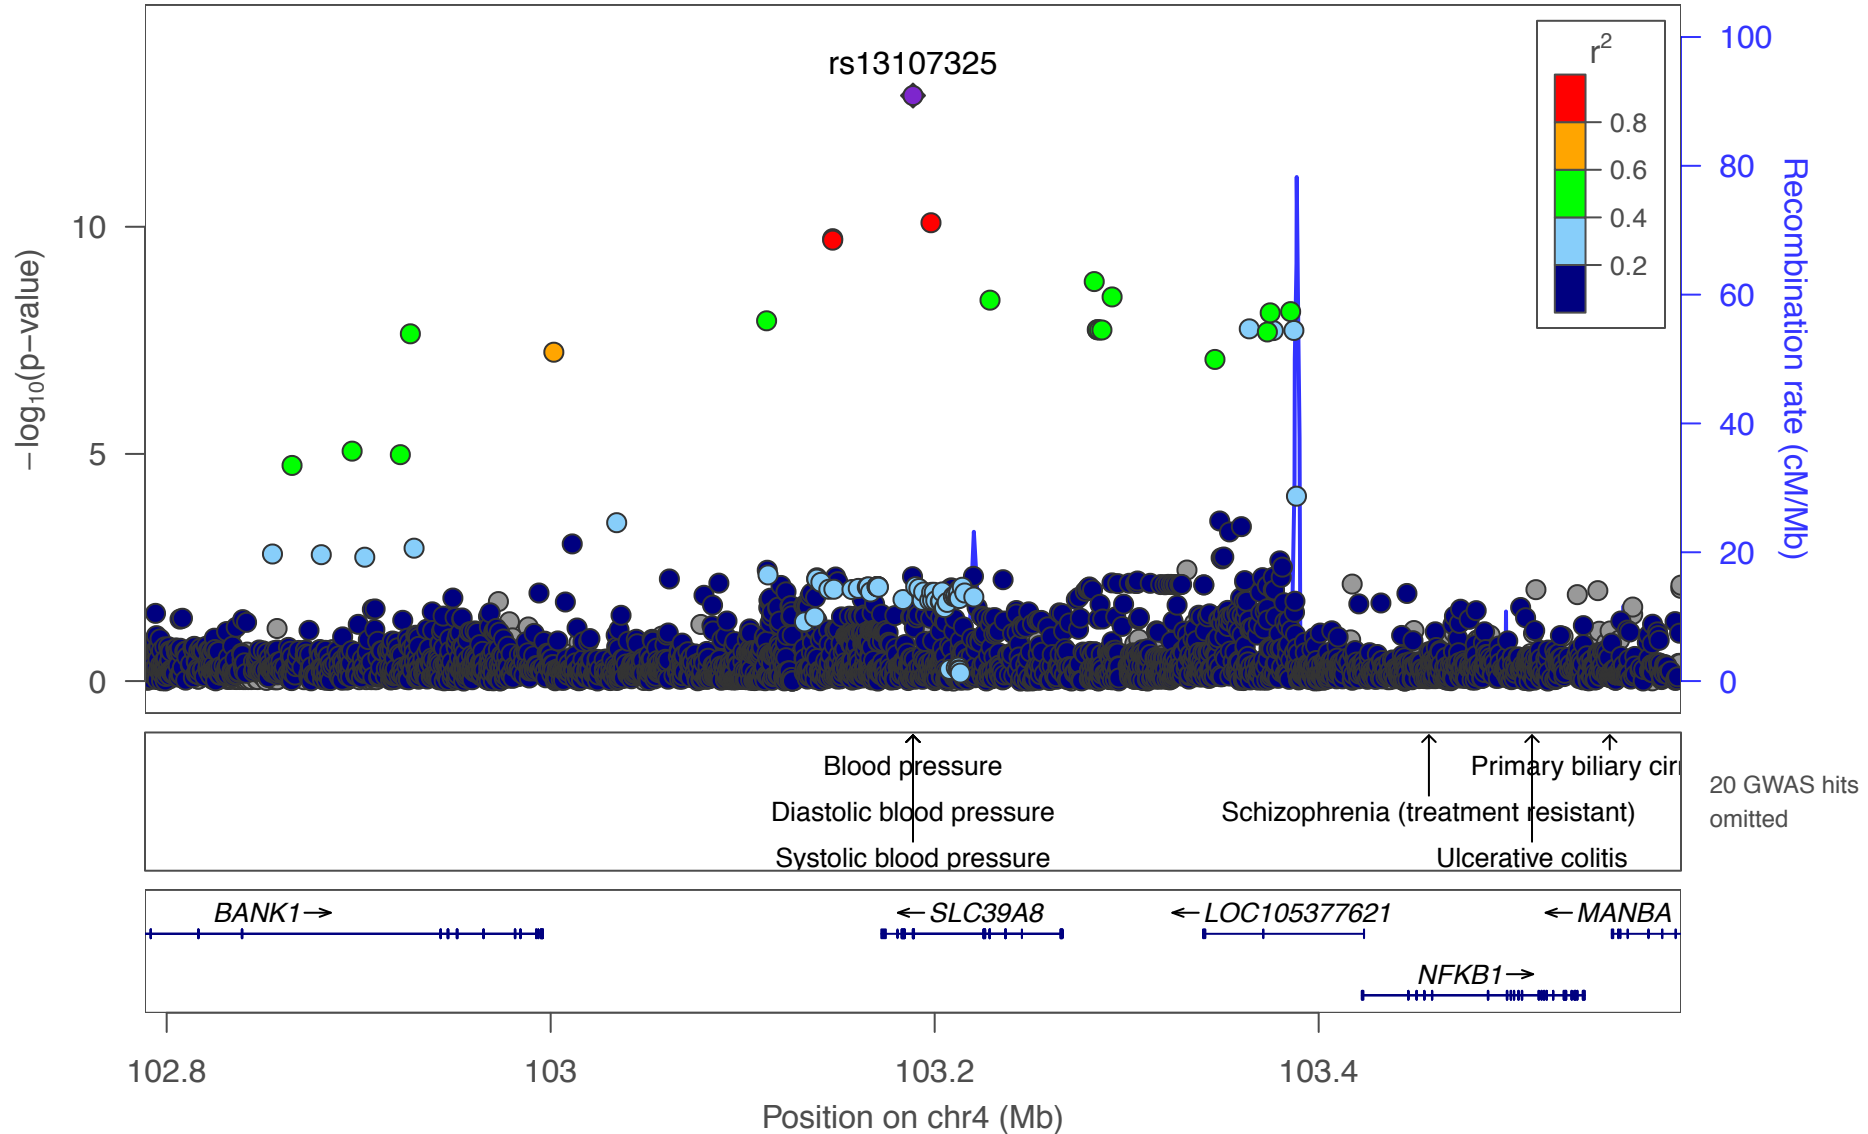

date: Thu Aug 17 18:01:59 2017

build: hg19

display range: chr4:102788709–103588709 [102788709–103588709]

hilite range: 0 – 0 [ 0 – 0 ]

reference SNP: chr4:103188709

number of SNPs plotted: 3534

min P.value: 1.29E–13 [chr4:103188709]

max P.value: 10E–1 [chr4:103244676]

omitted GWAS Hits: chr4:103.551603–Primary biliary cirrhosis, chr4:103.457418–Schizophrenia (treatment resistan

omitted GWAS Hits: NA, NA

GWAS Catalog SNPs in Region

| chr | pos (Mb) | trait                                                            | snp         |
|-----|----------|------------------------------------------------------------------|-------------|
| 4   | 102.8416 | Schizophrenia                                                    | rs13119516  |
| 4   | 102.8653 | Crohn's disease                                                  | rs13126505  |
| 4   | 102.8653 | Inflammatory bowel disease                                       | rs13126505  |
| 4   | 102.9269 | Crohn's disease                                                  | rs34592089  |
| 4   | 103.0542 | Alzheimer disease and age of onset                               | rs115641191 |
| 4   | 103.1469 | Schizophrenia                                                    | rs35518360  |
| 4   | 103.1887 | Blood pressure                                                   | rs13107325  |
| 4   | 103.1887 | Diastolic blood pressure                                         | rs13107325  |
| 4   | 103.1887 | Systolic blood pressure                                          | rs13107325  |
| 4   | 103.1887 | Hypertension                                                     | rs13107325  |
| 4   | 103.1887 | HDL cholesterol                                                  | rs13107325  |
| 4   | 103.1887 | Body mass index                                                  | rs13107325  |
| 4   | 103.1887 | Schizophrenia                                                    | rs13107325  |
| 4   | 103.1887 | NT-proBNP levels in acute coronary syndrome                      | rs13107325  |
| 4   | 103.1887 | Childhood body mass index                                        | rs13107325  |
| 4   | 103.1981 | HDL cholesterol                                                  | rs13135092  |
| 4   | 103.2048 | Sitting height ratio                                             | rs233817    |
| 4   | 103.2557 | Erythrocyte cadmium concentration in never smokers               | rs7664683   |
| 4   | 103.3497 | Homeostasis model assessment of beta-cell function (interaction) | rs6533014   |
| 4   | 103.4343 | Ulcerative colitis                                               | rs3774937   |
| 4   | 103.4574 | Schizophrenia (treatment resistant)                              | rs230529    |

## GWAS Catalog SNPs in Region

| <b>chr</b> | <b>pos (Mb)</b> | <b>trait</b>                            | <b>snp</b> |
|------------|-----------------|-----------------------------------------|------------|
| 4          | 103.5111        | Ulcerative colitis                      | rs3774959  |
| 4          | 103.5516        | Primary biliary cirrhosis               | rs7665090  |
| 4          | 103.5527        | Primary biliary cirrhosis               | rs1054037  |
| 4          | 103.5617        | Glomerular filtration rate (creatinine) | rs228611   |
| 4          | 103.5786        | Multiple sclerosis                      | rs228614   |



# FAST\_ROIs\_L\_cerebellum\_VIIIb

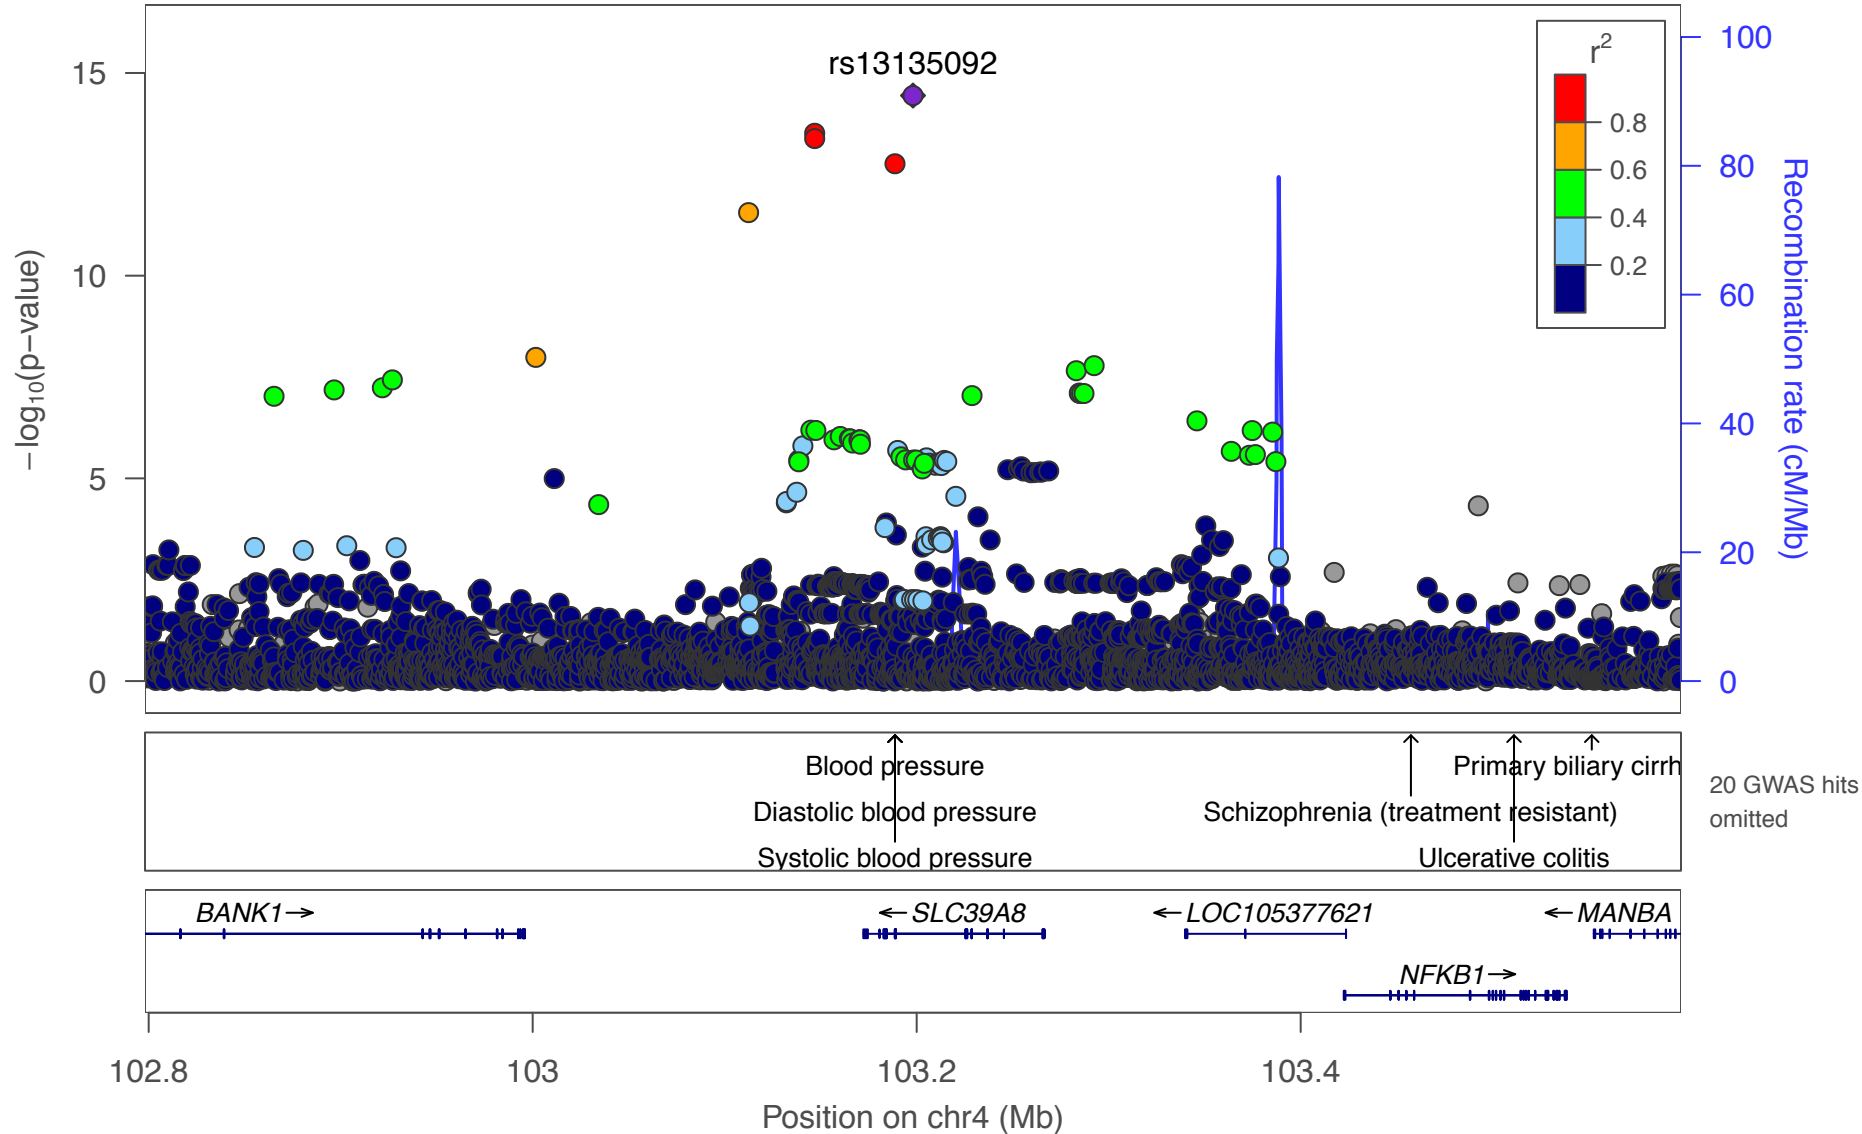

date: Thu Aug 17 18:02:44 2017

build: hg19

display range: chr4:102798082–103598082 [102798082–103598082]

hilite range: 0 – 0 [ 0 – 0 ]

reference SNP: chr4:103198082

number of SNPs plotted: 3541

min P.value: 3.61E–15 [chr4:103198082]

max P.value: 9.99E–1 [chr4:102907145]

omitted GWAS Hits: chr4:103.551603–Primary biliary cirrhosis, chr4:103.457418–Schizophrenia (treatment resistan

omitted GWAS Hits: NA, NA

GWAS Catalog SNPs in Region

| chr | pos (Mb) | trait                                                            | snp         |
|-----|----------|------------------------------------------------------------------|-------------|
| 4   | 102.8416 | Schizophrenia                                                    | rs13119516  |
| 4   | 102.8653 | Crohn's disease                                                  | rs13126505  |
| 4   | 102.8653 | Inflammatory bowel disease                                       | rs13126505  |
| 4   | 102.9269 | Crohn's disease                                                  | rs34592089  |
| 4   | 103.0542 | Alzheimer disease and age of onset                               | rs115641191 |
| 4   | 103.1469 | Schizophrenia                                                    | rs35518360  |
| 4   | 103.1887 | Blood pressure                                                   | rs13107325  |
| 4   | 103.1887 | Diastolic blood pressure                                         | rs13107325  |
| 4   | 103.1887 | Systolic blood pressure                                          | rs13107325  |
| 4   | 103.1887 | Hypertension                                                     | rs13107325  |
| 4   | 103.1887 | HDL cholesterol                                                  | rs13107325  |
| 4   | 103.1887 | Body mass index                                                  | rs13107325  |
| 4   | 103.1887 | Schizophrenia                                                    | rs13107325  |
| 4   | 103.1887 | NT-proBNP levels in acute coronary syndrome                      | rs13107325  |
| 4   | 103.1887 | Childhood body mass index                                        | rs13107325  |
| 4   | 103.1981 | HDL cholesterol                                                  | rs13135092  |
| 4   | 103.2048 | Sitting height ratio                                             | rs233817    |
| 4   | 103.2557 | Erythrocyte cadmium concentration in never smokers               | rs7664683   |
| 4   | 103.3497 | Homeostasis model assessment of beta-cell function (interaction) | rs6533014   |
| 4   | 103.4343 | Ulcerative colitis                                               | rs3774937   |
| 4   | 103.4574 | Schizophrenia (treatment resistant)                              | rs230529    |

## GWAS Catalog SNPs in Region

| <b>chr</b> | <b>pos (Mb)</b> | <b>trait</b>                            | <b>snp</b> |
|------------|-----------------|-----------------------------------------|------------|
| 4          | 103.5111        | Ulcerative colitis                      | rs3774959  |
| 4          | 103.5516        | Primary biliary cirrhosis               | rs7665090  |
| 4          | 103.5527        | Primary biliary cirrhosis               | rs1054037  |
| 4          | 103.5617        | Glomerular filtration rate (creatinine) | rs228611   |
| 4          | 103.5786        | Multiple sclerosis                      | rs228614   |

# FAST\_ROIs\_L\_cerebellum\_IX

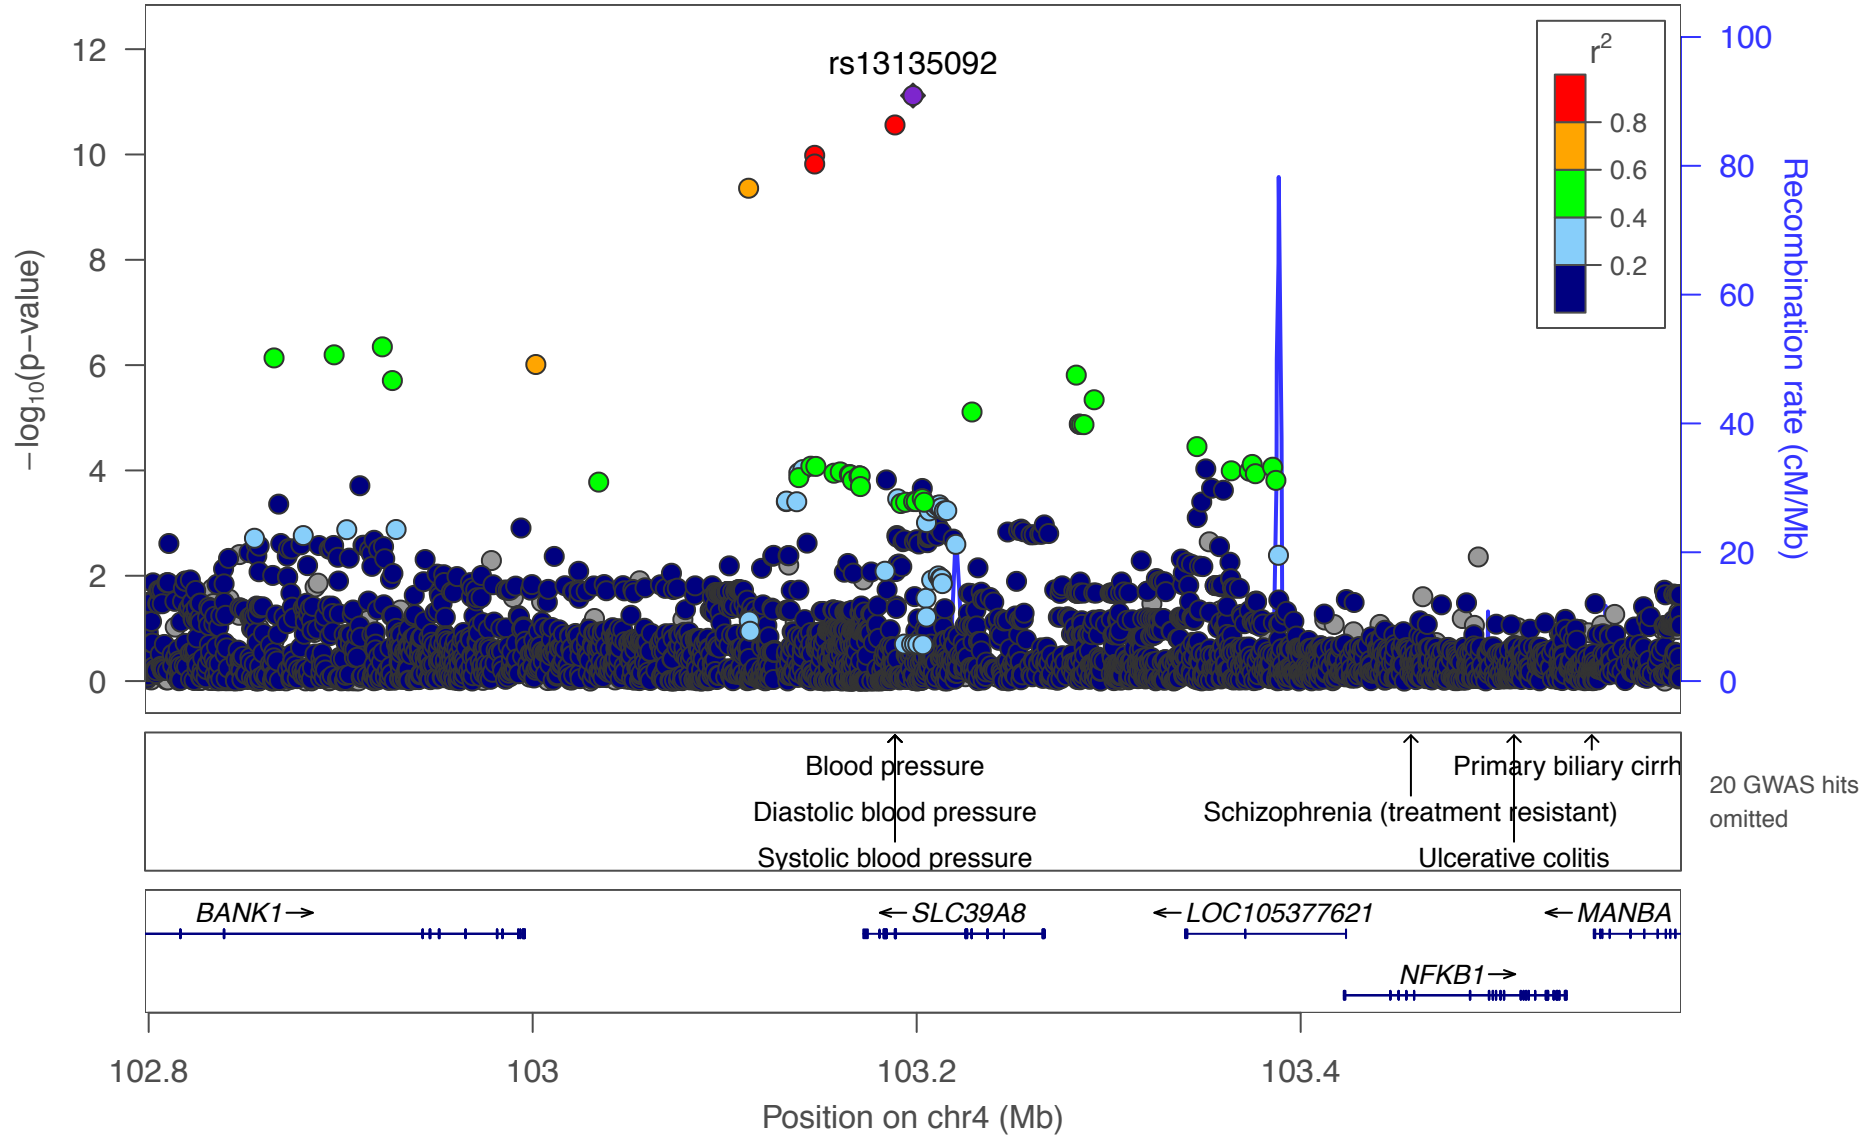

date: Thu Aug 17 18:02:44 2017

build: hg19

display range: chr4:102798082–103598082 [102798082–103598082]

hilite range: 0 – 0 [ 0 – 0 ]

reference SNP: chr4:103198082

number of SNPs plotted: 3541

min P.value: 7.6E–12 [chr4:103198082]

max P.value: 10E–1 [chr4:103087990]

omitted GWAS Hits: chr4:103.551603–Primary biliary cirrhosis, chr4:103.457418–Schizophrenia (treatment resistan

omitted GWAS Hits: NA, NA

GWAS Catalog SNPs in Region

| chr | pos (Mb) | trait                                                            | snp         |
|-----|----------|------------------------------------------------------------------|-------------|
| 4   | 102.8416 | Schizophrenia                                                    | rs13119516  |
| 4   | 102.8653 | Crohn's disease                                                  | rs13126505  |
| 4   | 102.8653 | Inflammatory bowel disease                                       | rs13126505  |
| 4   | 102.9269 | Crohn's disease                                                  | rs34592089  |
| 4   | 103.0542 | Alzheimer disease and age of onset                               | rs115641191 |
| 4   | 103.1469 | Schizophrenia                                                    | rs35518360  |
| 4   | 103.1887 | Blood pressure                                                   | rs13107325  |
| 4   | 103.1887 | Diastolic blood pressure                                         | rs13107325  |
| 4   | 103.1887 | Systolic blood pressure                                          | rs13107325  |
| 4   | 103.1887 | Hypertension                                                     | rs13107325  |
| 4   | 103.1887 | HDL cholesterol                                                  | rs13107325  |
| 4   | 103.1887 | Body mass index                                                  | rs13107325  |
| 4   | 103.1887 | Schizophrenia                                                    | rs13107325  |
| 4   | 103.1887 | NT-proBNP levels in acute coronary syndrome                      | rs13107325  |
| 4   | 103.1887 | Childhood body mass index                                        | rs13107325  |
| 4   | 103.1981 | HDL cholesterol                                                  | rs13135092  |
| 4   | 103.2048 | Sitting height ratio                                             | rs233817    |
| 4   | 103.2557 | Erythrocyte cadmium concentration in never smokers               | rs7664683   |
| 4   | 103.3497 | Homeostasis model assessment of beta-cell function (interaction) | rs6533014   |
| 4   | 103.4343 | Ulcerative colitis                                               | rs3774937   |
| 4   | 103.4574 | Schizophrenia (treatment resistant)                              | rs230529    |

## GWAS Catalog SNPs in Region

| <b>chr</b> | <b>pos (Mb)</b> | <b>trait</b>                            | <b>snp</b> |
|------------|-----------------|-----------------------------------------|------------|
| 4          | 103.5111        | Ulcerative colitis                      | rs3774959  |
| 4          | 103.5516        | Primary biliary cirrhosis               | rs7665090  |
| 4          | 103.5527        | Primary biliary cirrhosis               | rs1054037  |
| 4          | 103.5617        | Glomerular filtration rate (creatinine) | rs228611   |
| 4          | 103.5786        | Multiple sclerosis                      | rs228614   |



# FAST\_ROIs\_R\_cerebellum\_IX

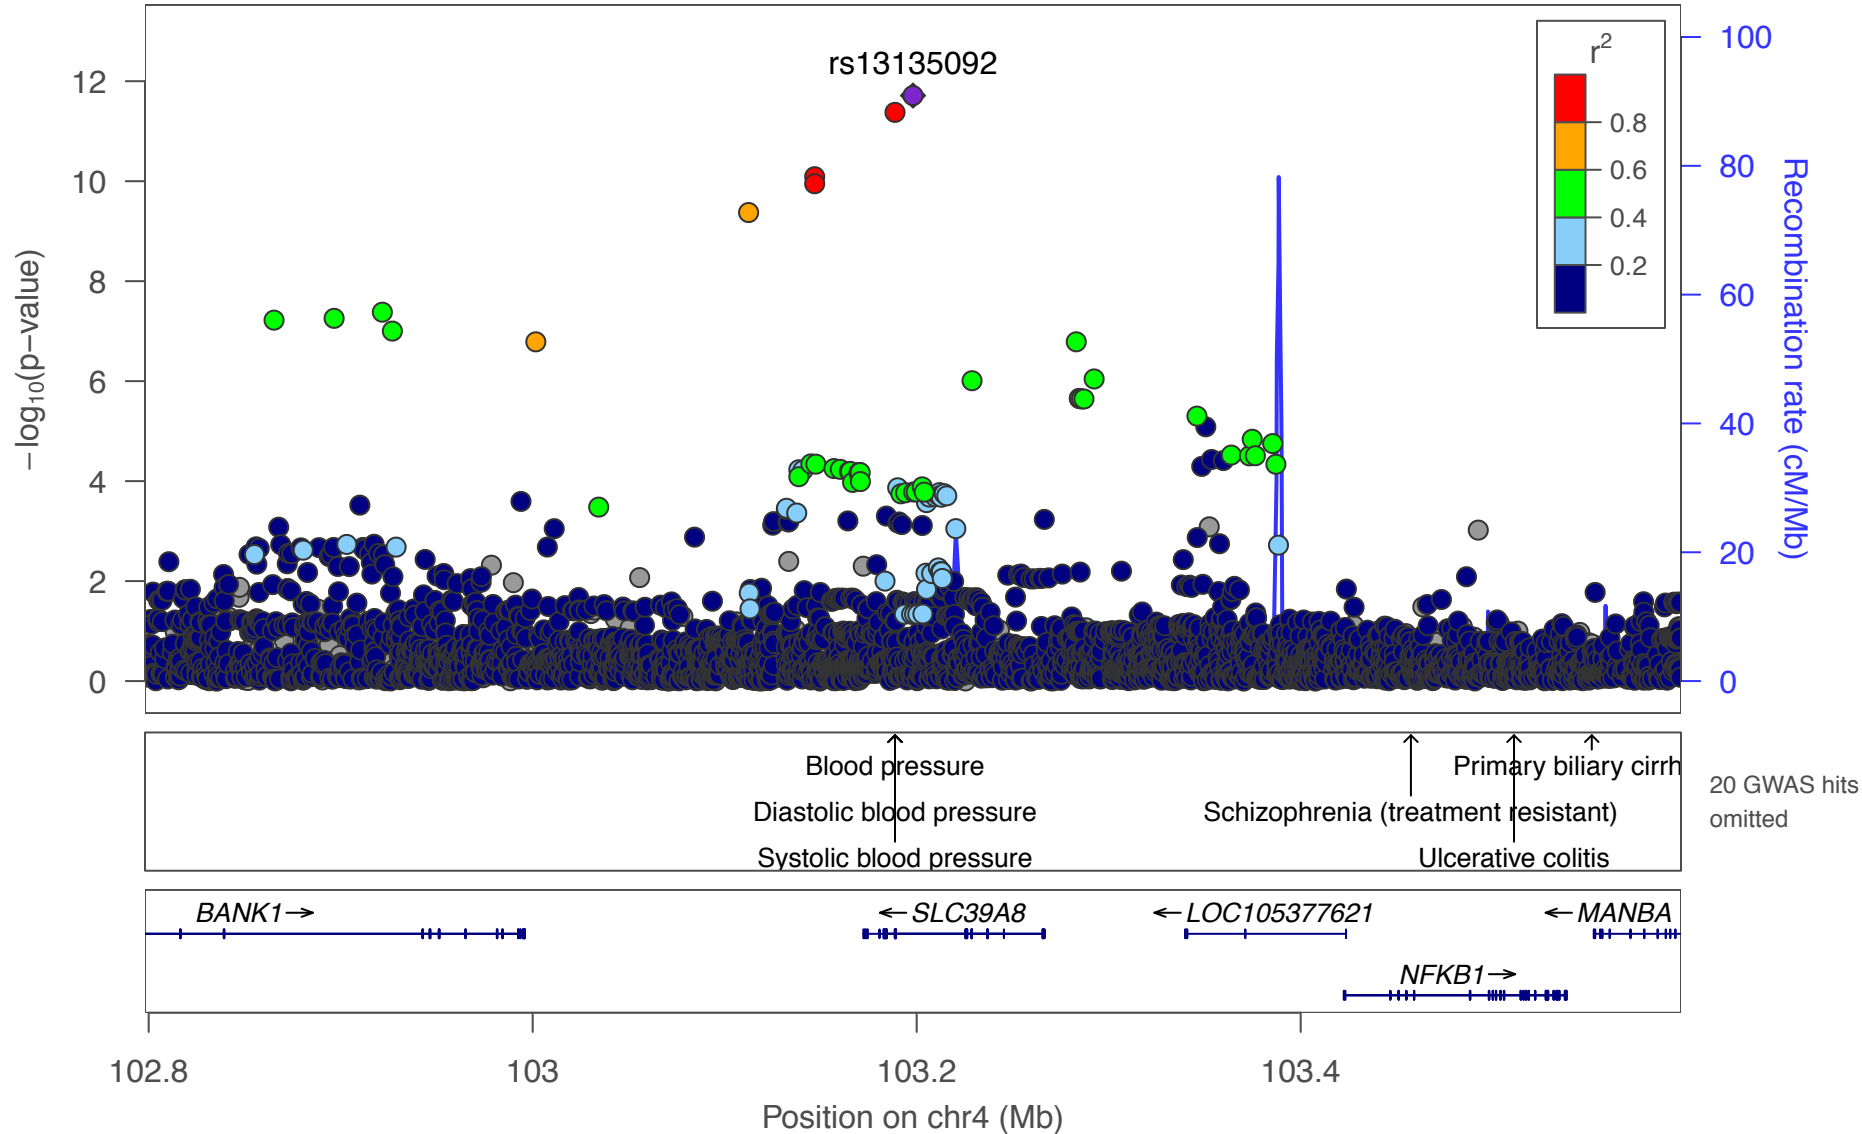

date: Thu Aug 17 18:09:02 2017

build: hg19

display range: chr4:102798082–103598082 [102798082–103598082]

hilite range: 0 – 0 [ 0 – 0 ]

reference SNP: chr4:103198082

number of SNPs plotted: 3541

min P.value: 1.94E–12 [chr4:103198082]

max P.value: 10E–1 [chr4:103070765]

omitted GWAS Hits: chr4:103.551603–Primary biliary cirrhosis, chr4:103.457418–Schizophrenia (treatment resistan

omitted GWAS Hits: NA, NA

GWAS Catalog SNPs in Region

| chr | pos (Mb) | trait                                                            | snp         |
|-----|----------|------------------------------------------------------------------|-------------|
| 4   | 102.8416 | Schizophrenia                                                    | rs13119516  |
| 4   | 102.8653 | Crohn's disease                                                  | rs13126505  |
| 4   | 102.8653 | Inflammatory bowel disease                                       | rs13126505  |
| 4   | 102.9269 | Crohn's disease                                                  | rs34592089  |
| 4   | 103.0542 | Alzheimer disease and age of onset                               | rs115641191 |
| 4   | 103.1469 | Schizophrenia                                                    | rs35518360  |
| 4   | 103.1887 | Blood pressure                                                   | rs13107325  |
| 4   | 103.1887 | Diastolic blood pressure                                         | rs13107325  |
| 4   | 103.1887 | Systolic blood pressure                                          | rs13107325  |
| 4   | 103.1887 | Hypertension                                                     | rs13107325  |
| 4   | 103.1887 | HDL cholesterol                                                  | rs13107325  |
| 4   | 103.1887 | Body mass index                                                  | rs13107325  |
| 4   | 103.1887 | Schizophrenia                                                    | rs13107325  |
| 4   | 103.1887 | NT-proBNP levels in acute coronary syndrome                      | rs13107325  |
| 4   | 103.1887 | Childhood body mass index                                        | rs13107325  |
| 4   | 103.1981 | HDL cholesterol                                                  | rs13135092  |
| 4   | 103.2048 | Sitting height ratio                                             | rs233817    |
| 4   | 103.2557 | Erythrocyte cadmium concentration in never smokers               | rs7664683   |
| 4   | 103.3497 | Homeostasis model assessment of beta-cell function (interaction) | rs6533014   |
| 4   | 103.4343 | Ulcerative colitis                                               | rs3774937   |
| 4   | 103.4574 | Schizophrenia (treatment resistant)                              | rs230529    |

## GWAS Catalog SNPs in Region

| <b>chr</b> | <b>pos (Mb)</b> | <b>trait</b>                            | <b>snp</b> |
|------------|-----------------|-----------------------------------------|------------|
| 4          | 103.5111        | Ulcerative colitis                      | rs3774959  |
| 4          | 103.5516        | Primary biliary cirrhosis               | rs7665090  |
| 4          | 103.5527        | Primary biliary cirrhosis               | rs1054037  |
| 4          | 103.5617        | Glomerular filtration rate (creatinine) | rs228611   |
| 4          | 103.5786        | Multiple sclerosis                      | rs228614   |

# TBSS\_ICVF\_Cerebral\_peduncle\_R

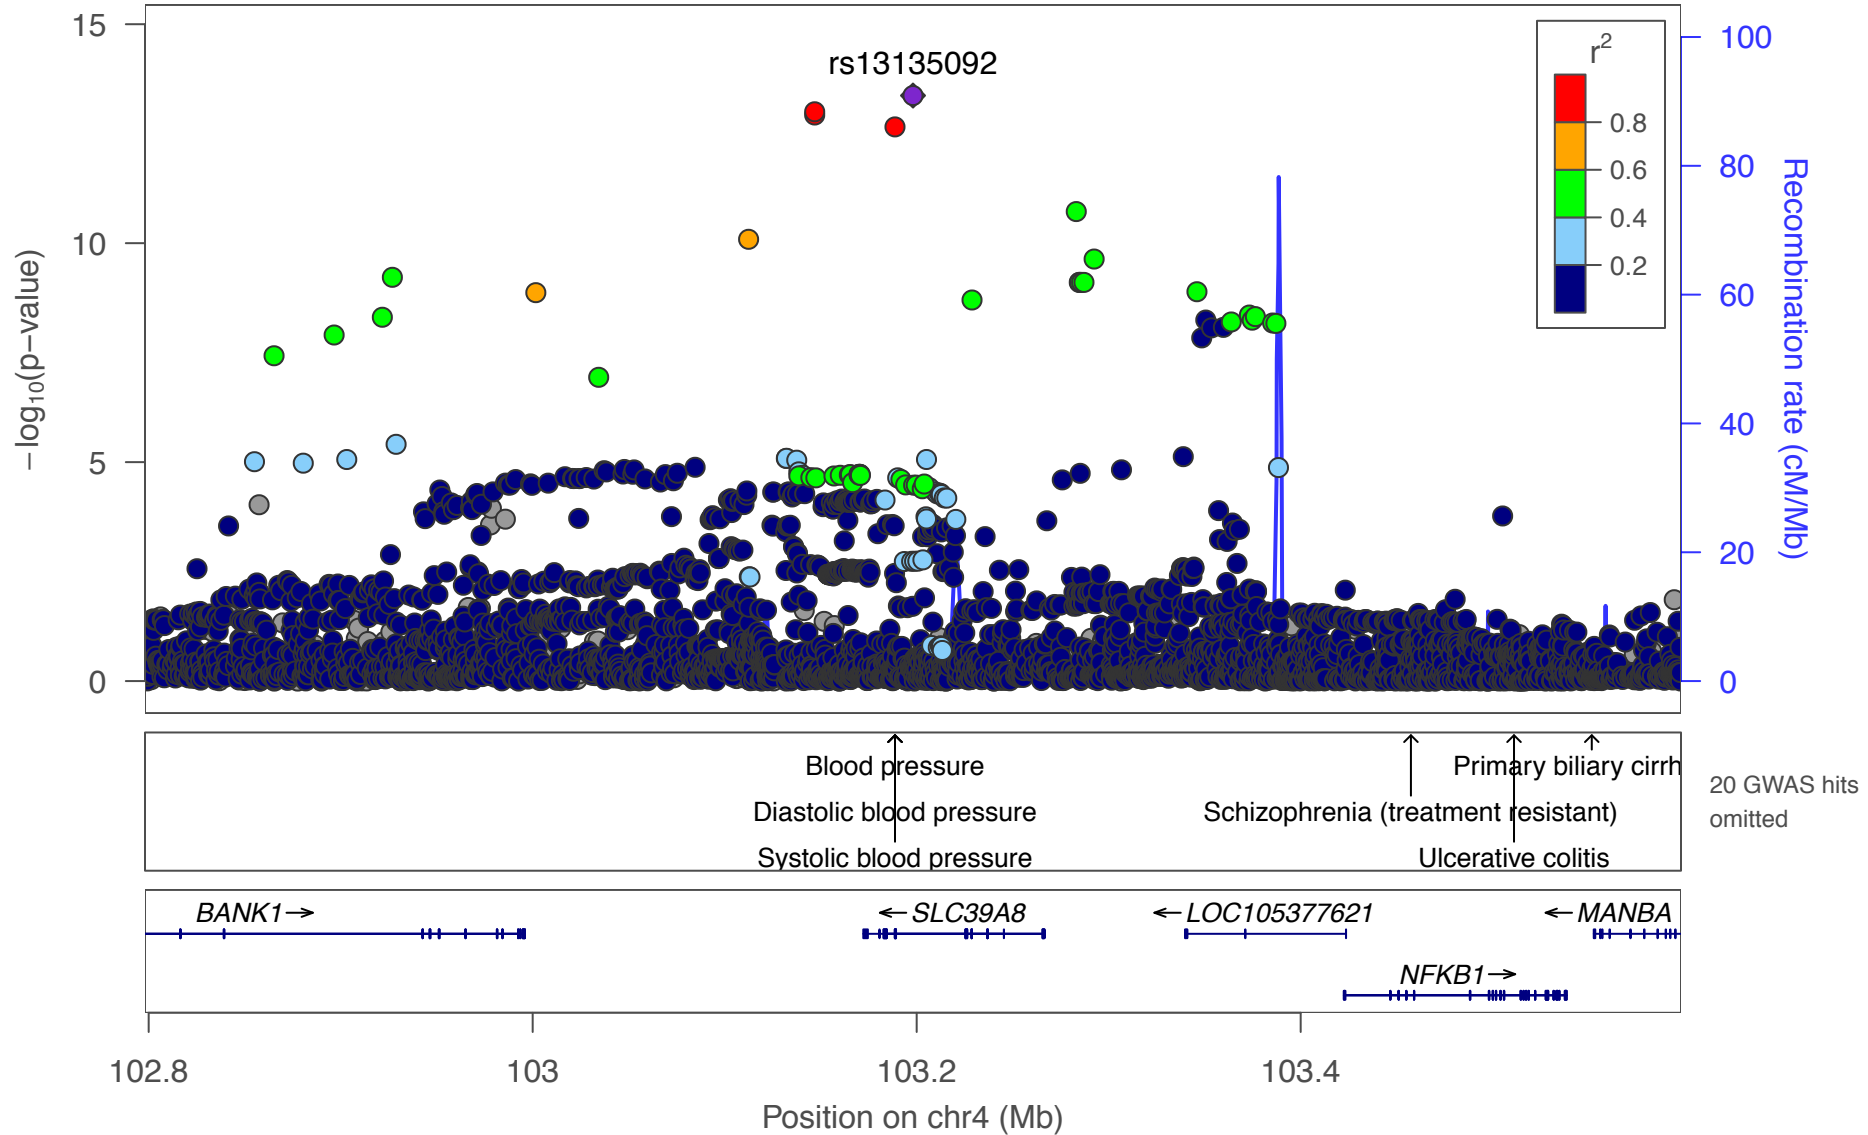

date: Thu Aug 17 18:09:02 2017

build: hg19

display range: chr4:102798082–103598082 [102798082–103598082]

hilite range: 0 – 0 [ 0 – 0 ]

reference SNP: chr4:103198082

number of SNPs plotted: 3541

min P.value: 4.26E–14 [chr4:103198082]

max P.value: 10E–1 [chr4:102865446]

omitted GWAS Hits: chr4:103.551603–Primary biliary cirrhosis, chr4:103.457418–Schizophrenia (treatment resistan

omitted GWAS Hits: NA, NA

GWAS Catalog SNPs in Region

| chr | pos (Mb) | trait                                                            | snp         |
|-----|----------|------------------------------------------------------------------|-------------|
| 4   | 102.8416 | Schizophrenia                                                    | rs13119516  |
| 4   | 102.8653 | Crohn's disease                                                  | rs13126505  |
| 4   | 102.8653 | Inflammatory bowel disease                                       | rs13126505  |
| 4   | 102.9269 | Crohn's disease                                                  | rs34592089  |
| 4   | 103.0542 | Alzheimer disease and age of onset                               | rs115641191 |
| 4   | 103.1469 | Schizophrenia                                                    | rs35518360  |
| 4   | 103.1887 | Blood pressure                                                   | rs13107325  |
| 4   | 103.1887 | Diastolic blood pressure                                         | rs13107325  |
| 4   | 103.1887 | Systolic blood pressure                                          | rs13107325  |
| 4   | 103.1887 | Hypertension                                                     | rs13107325  |
| 4   | 103.1887 | HDL cholesterol                                                  | rs13107325  |
| 4   | 103.1887 | Body mass index                                                  | rs13107325  |
| 4   | 103.1887 | Schizophrenia                                                    | rs13107325  |
| 4   | 103.1887 | NT-proBNP levels in acute coronary syndrome                      | rs13107325  |
| 4   | 103.1887 | Childhood body mass index                                        | rs13107325  |
| 4   | 103.1981 | HDL cholesterol                                                  | rs13135092  |
| 4   | 103.2048 | Sitting height ratio                                             | rs233817    |
| 4   | 103.2557 | Erythrocyte cadmium concentration in never smokers               | rs7664683   |
| 4   | 103.3497 | Homeostasis model assessment of beta-cell function (interaction) | rs6533014   |
| 4   | 103.4343 | Ulcerative colitis                                               | rs3774937   |
| 4   | 103.4574 | Schizophrenia (treatment resistant)                              | rs230529    |

## GWAS Catalog SNPs in Region

| <b>chr</b> | <b>pos (Mb)</b> | <b>trait</b>                            | <b>snp</b> |
|------------|-----------------|-----------------------------------------|------------|
| 4          | 103.5111        | Ulcerative colitis                      | rs3774959  |
| 4          | 103.5516        | Primary biliary cirrhosis               | rs7665090  |
| 4          | 103.5527        | Primary biliary cirrhosis               | rs1054037  |
| 4          | 103.5617        | Glomerular filtration rate (creatinine) | rs228611   |
| 4          | 103.5786        | Multiple sclerosis                      | rs228614   |



# TBSS\_ICVF\_Cerebral\_peduncle\_L

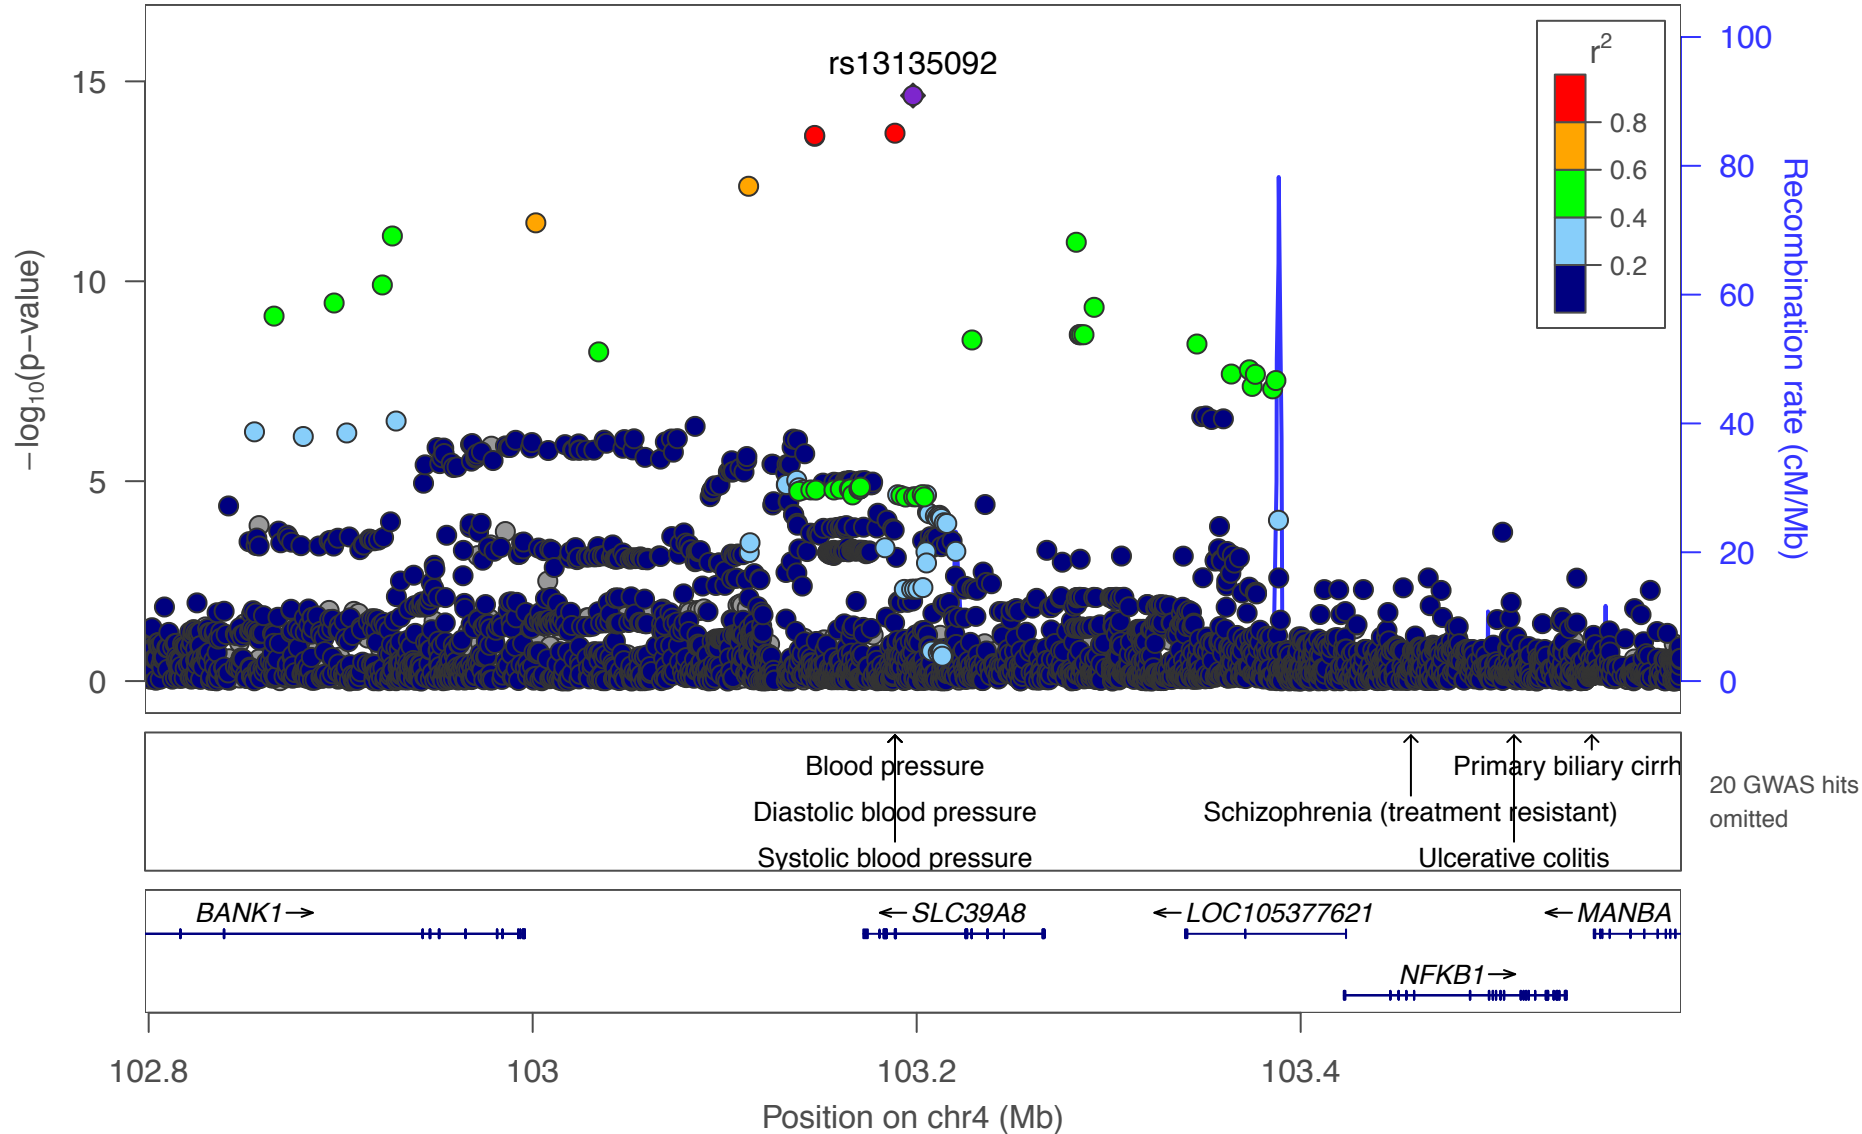

date: Thu Aug 17 18:09:02 2017

build: hg19

display range: chr4:102798082–103598082 [102798082–103598082]

hilite range: 0 – 0 [ 0 – 0 ]

reference SNP: chr4:103198082

number of SNPs plotted: 3541

min P.value: 2.26E–15 [chr4:103198082]

max P.value: 10E–1 [chr4:103322304]

omitted GWAS Hits: chr4:103.551603–Primary biliary cirrhosis, chr4:103.457418–Schizophrenia (treatment resistan

omitted GWAS Hits: NA, NA

GWAS Catalog SNPs in Region

| chr | pos (Mb) | trait                                                            | snp         |
|-----|----------|------------------------------------------------------------------|-------------|
| 4   | 102.8416 | Schizophrenia                                                    | rs13119516  |
| 4   | 102.8653 | Crohn's disease                                                  | rs13126505  |
| 4   | 102.8653 | Inflammatory bowel disease                                       | rs13126505  |
| 4   | 102.9269 | Crohn's disease                                                  | rs34592089  |
| 4   | 103.0542 | Alzheimer disease and age of onset                               | rs115641191 |
| 4   | 103.1469 | Schizophrenia                                                    | rs35518360  |
| 4   | 103.1887 | Blood pressure                                                   | rs13107325  |
| 4   | 103.1887 | Diastolic blood pressure                                         | rs13107325  |
| 4   | 103.1887 | Systolic blood pressure                                          | rs13107325  |
| 4   | 103.1887 | Hypertension                                                     | rs13107325  |
| 4   | 103.1887 | HDL cholesterol                                                  | rs13107325  |
| 4   | 103.1887 | Body mass index                                                  | rs13107325  |
| 4   | 103.1887 | Schizophrenia                                                    | rs13107325  |
| 4   | 103.1887 | NT-proBNP levels in acute coronary syndrome                      | rs13107325  |
| 4   | 103.1887 | Childhood body mass index                                        | rs13107325  |
| 4   | 103.1981 | HDL cholesterol                                                  | rs13135092  |
| 4   | 103.2048 | Sitting height ratio                                             | rs233817    |
| 4   | 103.2557 | Erythrocyte cadmium concentration in never smokers               | rs7664683   |
| 4   | 103.3497 | Homeostasis model assessment of beta-cell function (interaction) | rs6533014   |
| 4   | 103.4343 | Ulcerative colitis                                               | rs3774937   |
| 4   | 103.4574 | Schizophrenia (treatment resistant)                              | rs230529    |

## GWAS Catalog SNPs in Region

| <b>chr</b> | <b>pos (Mb)</b> | <b>trait</b>                            | <b>snp</b> |
|------------|-----------------|-----------------------------------------|------------|
| 4          | 103.5111        | Ulcerative colitis                      | rs3774959  |
| 4          | 103.5516        | Primary biliary cirrhosis               | rs7665090  |
| 4          | 103.5527        | Primary biliary cirrhosis               | rs1054037  |
| 4          | 103.5617        | Glomerular filtration rate (creatinine) | rs228611   |
| 4          | 103.5786        | Multiple sclerosis                      | rs228614   |

# TBSS\_ICVF\_Medial\_lemniscus\_R

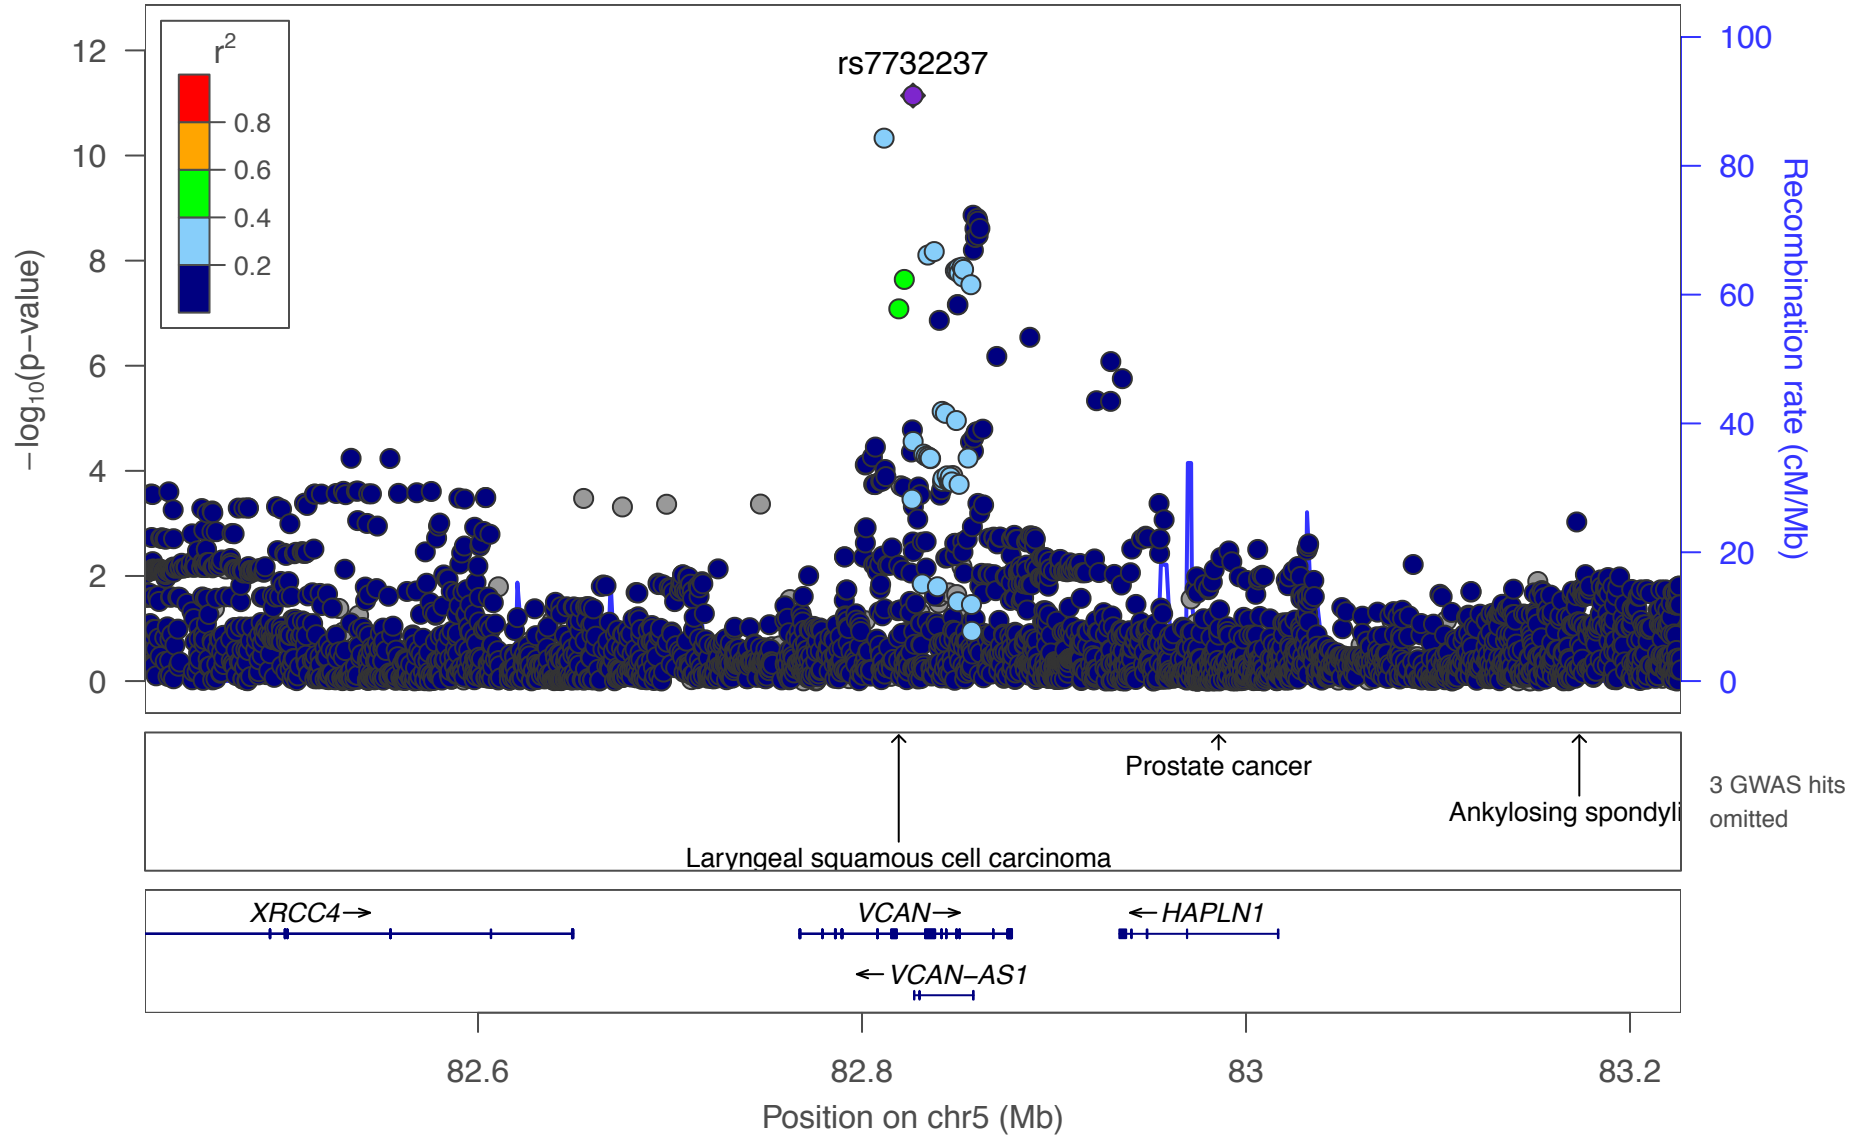

date: Thu Aug 17 18:03:31 2017

build: hg19

display range: chr5:82426556–83226556 [82426556–83226556]

hilite range: 0 – 0 [ 0 – 0 ]

reference SNP: chr5:82826556

number of SNPs plotted: 3442

min P.value: 7.23E–12 [chr5:82826556]

max P.value: 9.98E–1 [chr5:82951780]

omitted GWAS Hits: NA, NA

## GWAS Catalog SNPs in Region

| <b>chr</b> | <b>pos (Mb)</b> | <b>trait</b>                      | <b>snp</b> |
|------------|-----------------|-----------------------------------|------------|
| 5          | 82.81912        | Laryngeal squamous cell carcinoma | rs310518   |
| 5          | 82.84549        | Diisocyanate-induced asthma       | rs3852186  |
| 5          | 82.88991        | Major depressive disorder         | rs310501   |
| 5          | 82.96073        | Visceral fat                      | rs3846635  |
| 5          | 82.98574        | Prostate cancer                   | rs4466137  |
| 5          | 83.17359        | Ankylosing spondylitis            | rs4552569  |

# TBSS\_ICVF\_Medial\_lemniscus\_L

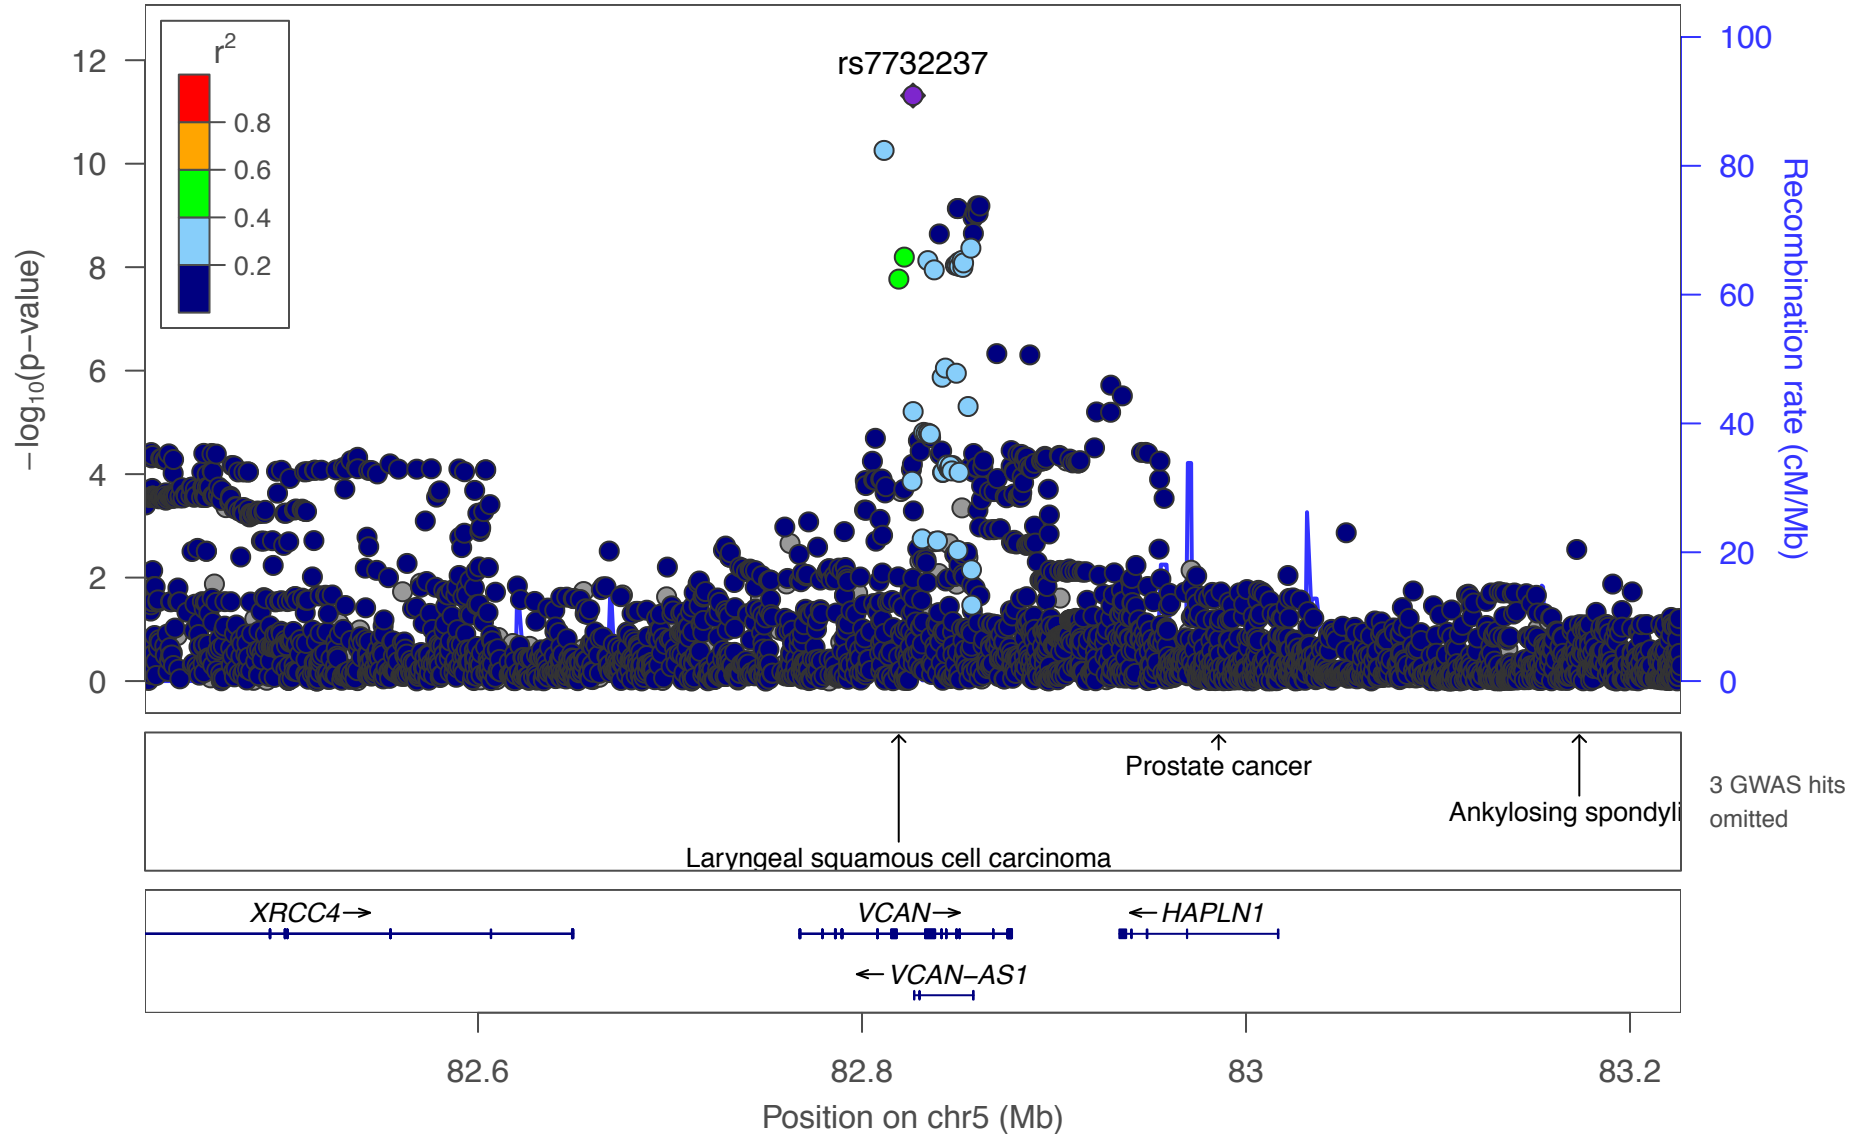



date: Thu Aug 17 18:03:31 2017

build: hg19

display range: chr5:82426556–83226556 [82426556–83226556]

hilite range: 0 – 0 [ 0 – 0 ]

reference SNP: chr5:82826556

number of SNPs plotted: 3442

min P.value: 4.82E–12 [chr5:82826556]

max P.value: 10E–1 [chr5:82749904]

omitted GWAS Hits: NA, NA

## GWAS Catalog SNPs in Region

| <b>chr</b> | <b>pos (Mb)</b> | <b>trait</b>                      | <b>snp</b> |
|------------|-----------------|-----------------------------------|------------|
| 5          | 82.81912        | Laryngeal squamous cell carcinoma | rs310518   |
| 5          | 82.84549        | Diisocyanate-induced asthma       | rs3852186  |
| 5          | 82.88991        | Major depressive disorder         | rs310501   |
| 5          | 82.96073        | Visceral fat                      | rs3846635  |
| 5          | 82.98574        | Prostate cancer                   | rs4466137  |
| 5          | 83.17359        | Ankylosing spondylitis            | rs4552569  |

# ProbtrackX\_FA\_ptr\_r

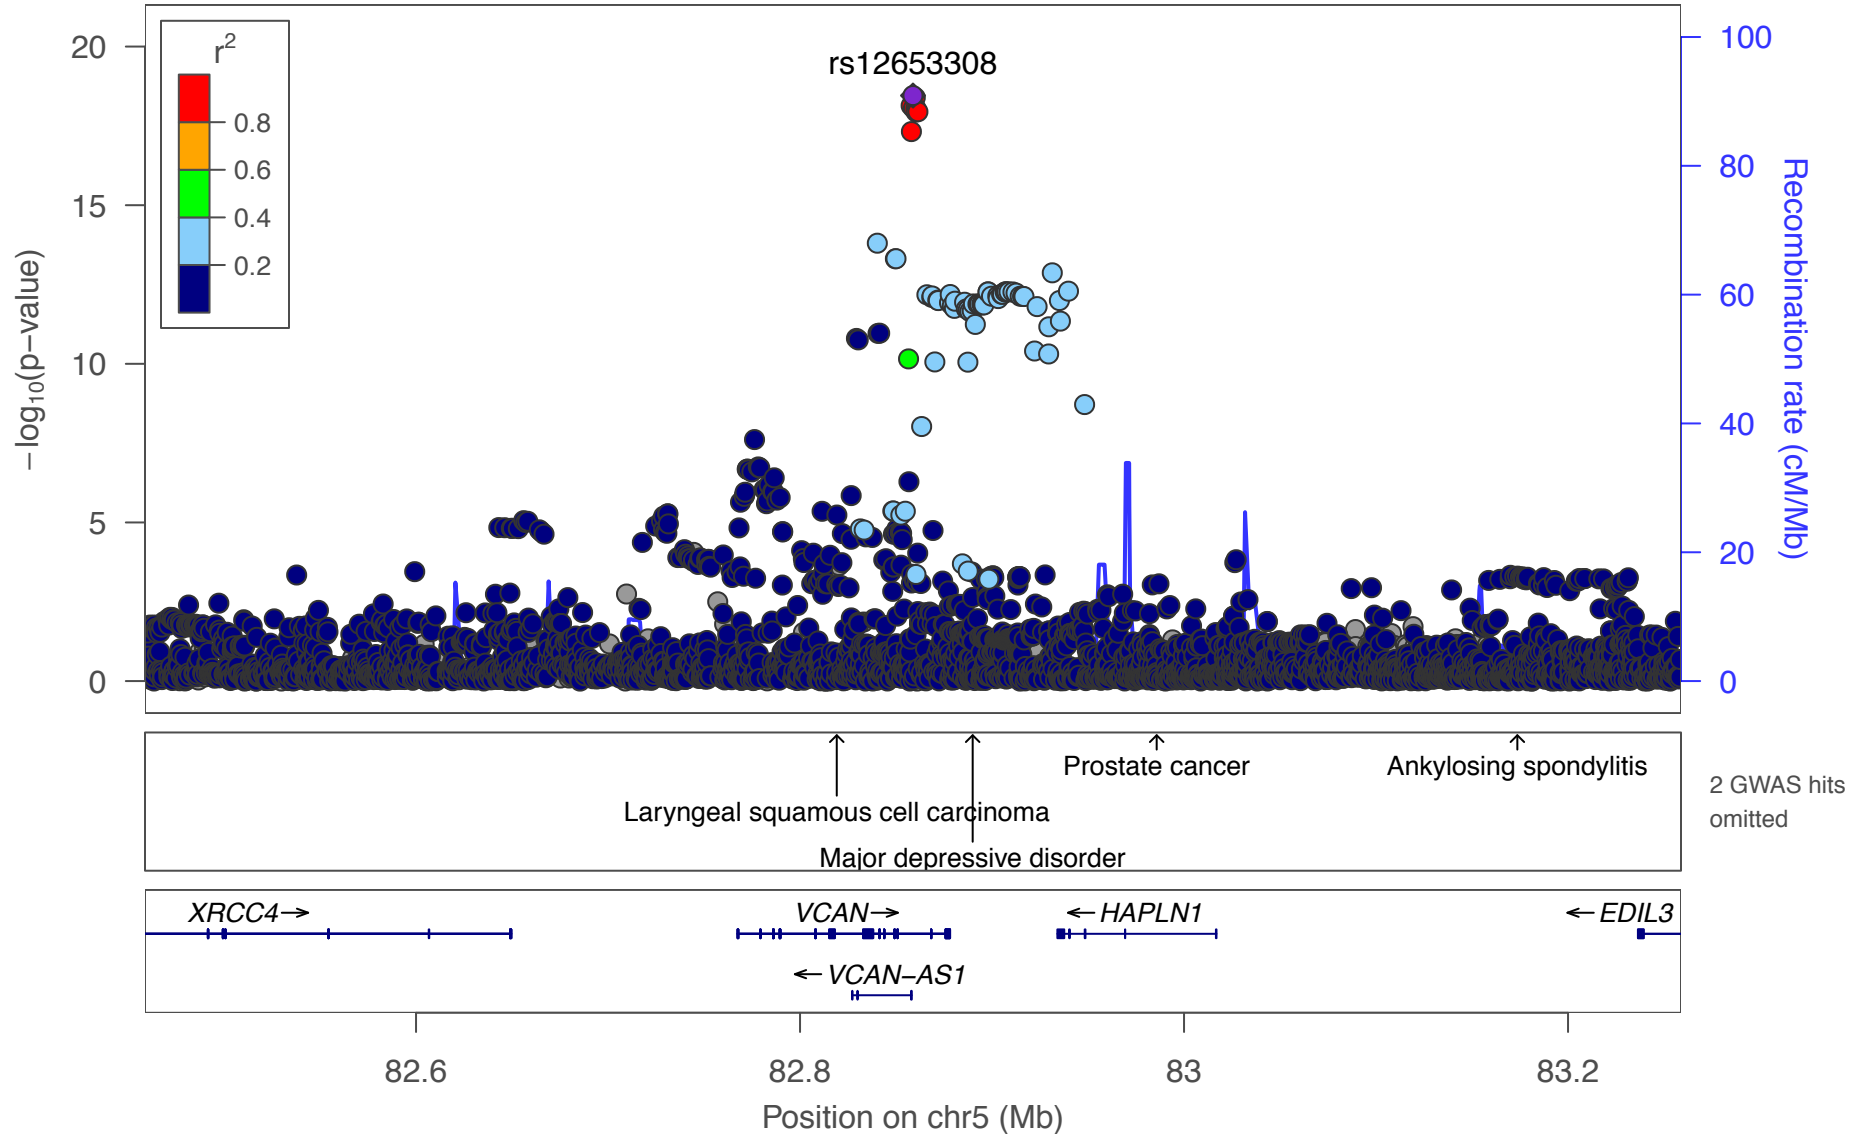

date: Thu Aug 17 17:52:01 2017

build: hg19

display range: chr5:82458828–83258828 [82458828–83258828]

hilite range: 0 – 0 [ 0 – 0 ]

reference SNP: chr5:82858828

number of SNPs plotted: 3398

min P.value: 3.5E–19 [chr5:82858828]

max P.value: 10E–1 [chr5:82813266]

omitted GWAS Hits: NA, NA

## GWAS Catalog SNPs in Region

| <b>chr</b> | <b>pos (Mb)</b> | <b>trait</b>                      | <b>snp</b> |
|------------|-----------------|-----------------------------------|------------|
| 5          | 82.81912        | Laryngeal squamous cell carcinoma | rs310518   |
| 5          | 82.84549        | Diisocyanate-induced asthma       | rs3852186  |
| 5          | 82.88991        | Major depressive disorder         | rs310501   |
| 5          | 82.96073        | Visceral fat                      | rs3846635  |
| 5          | 82.98574        | Prostate cancer                   | rs4466137  |
| 5          | 83.17359        | Ankylosing spondylitis            | rs4552569  |

# ProbtrackX\_L2\_ptr\_r

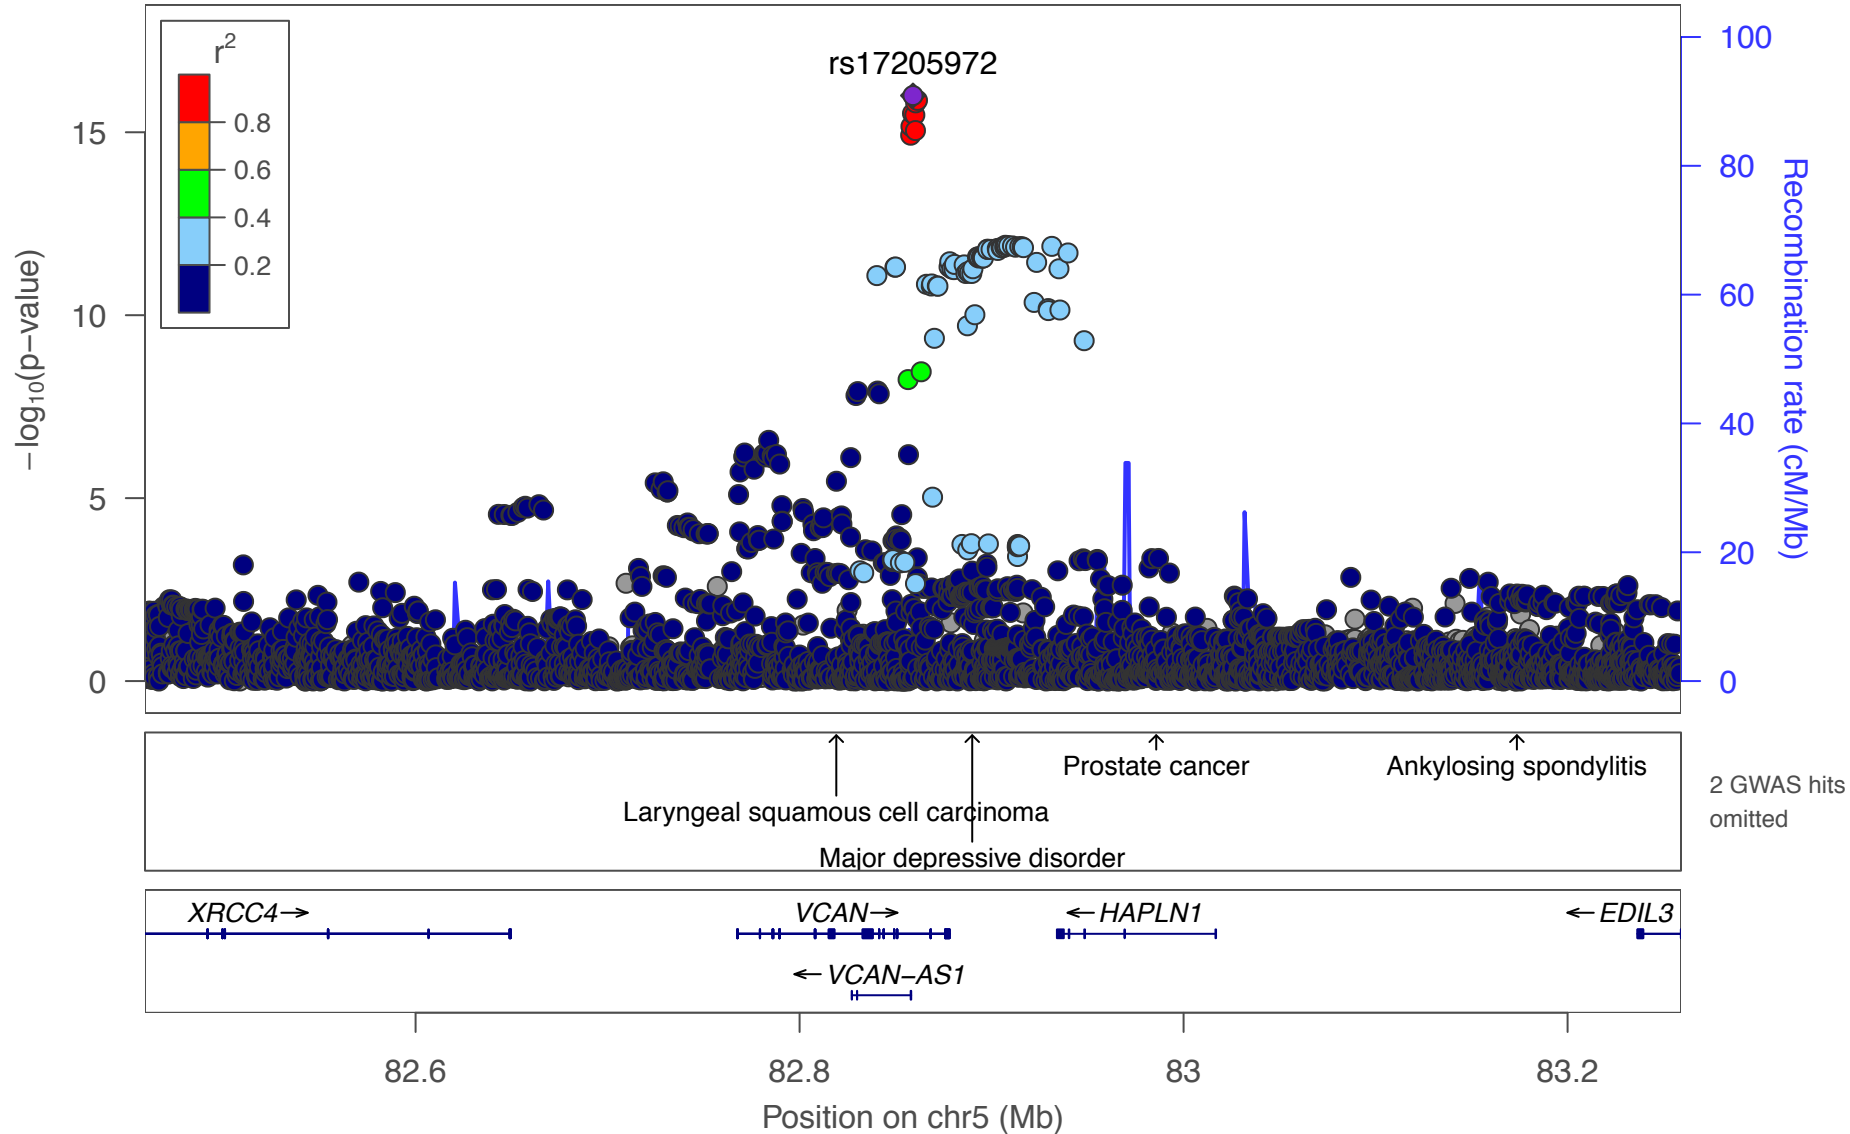

date: Thu Aug 17 17:52:01 2017

build: hg19

display range: chr5:82459065–83259065 [82459065–83259065]

hilite range: 0 – 0 [ 0 – 0 ]

reference SNP: chr5:82859065

number of SNPs plotted: 3396

min P.value: 9.93E–17 [chr5:82859065]

max P.value: 10E–1 [chr5:83027085]

omitted GWAS Hits: NA, NA

## GWAS Catalog SNPs in Region

| <b>chr</b> | <b>pos (Mb)</b> | <b>trait</b>                      | <b>snp</b> |
|------------|-----------------|-----------------------------------|------------|
| 5          | 82.81912        | Laryngeal squamous cell carcinoma | rs310518   |
| 5          | 82.84549        | Diisocyanate-induced asthma       | rs3852186  |
| 5          | 82.88991        | Major depressive disorder         | rs310501   |
| 5          | 82.96073        | Visceral fat                      | rs3846635  |
| 5          | 82.98574        | Prostate cancer                   | rs4466137  |
| 5          | 83.17359        | Ankylosing spondylitis            | rs4552569  |



# ProbtrackX\_L3\_ptr\_r

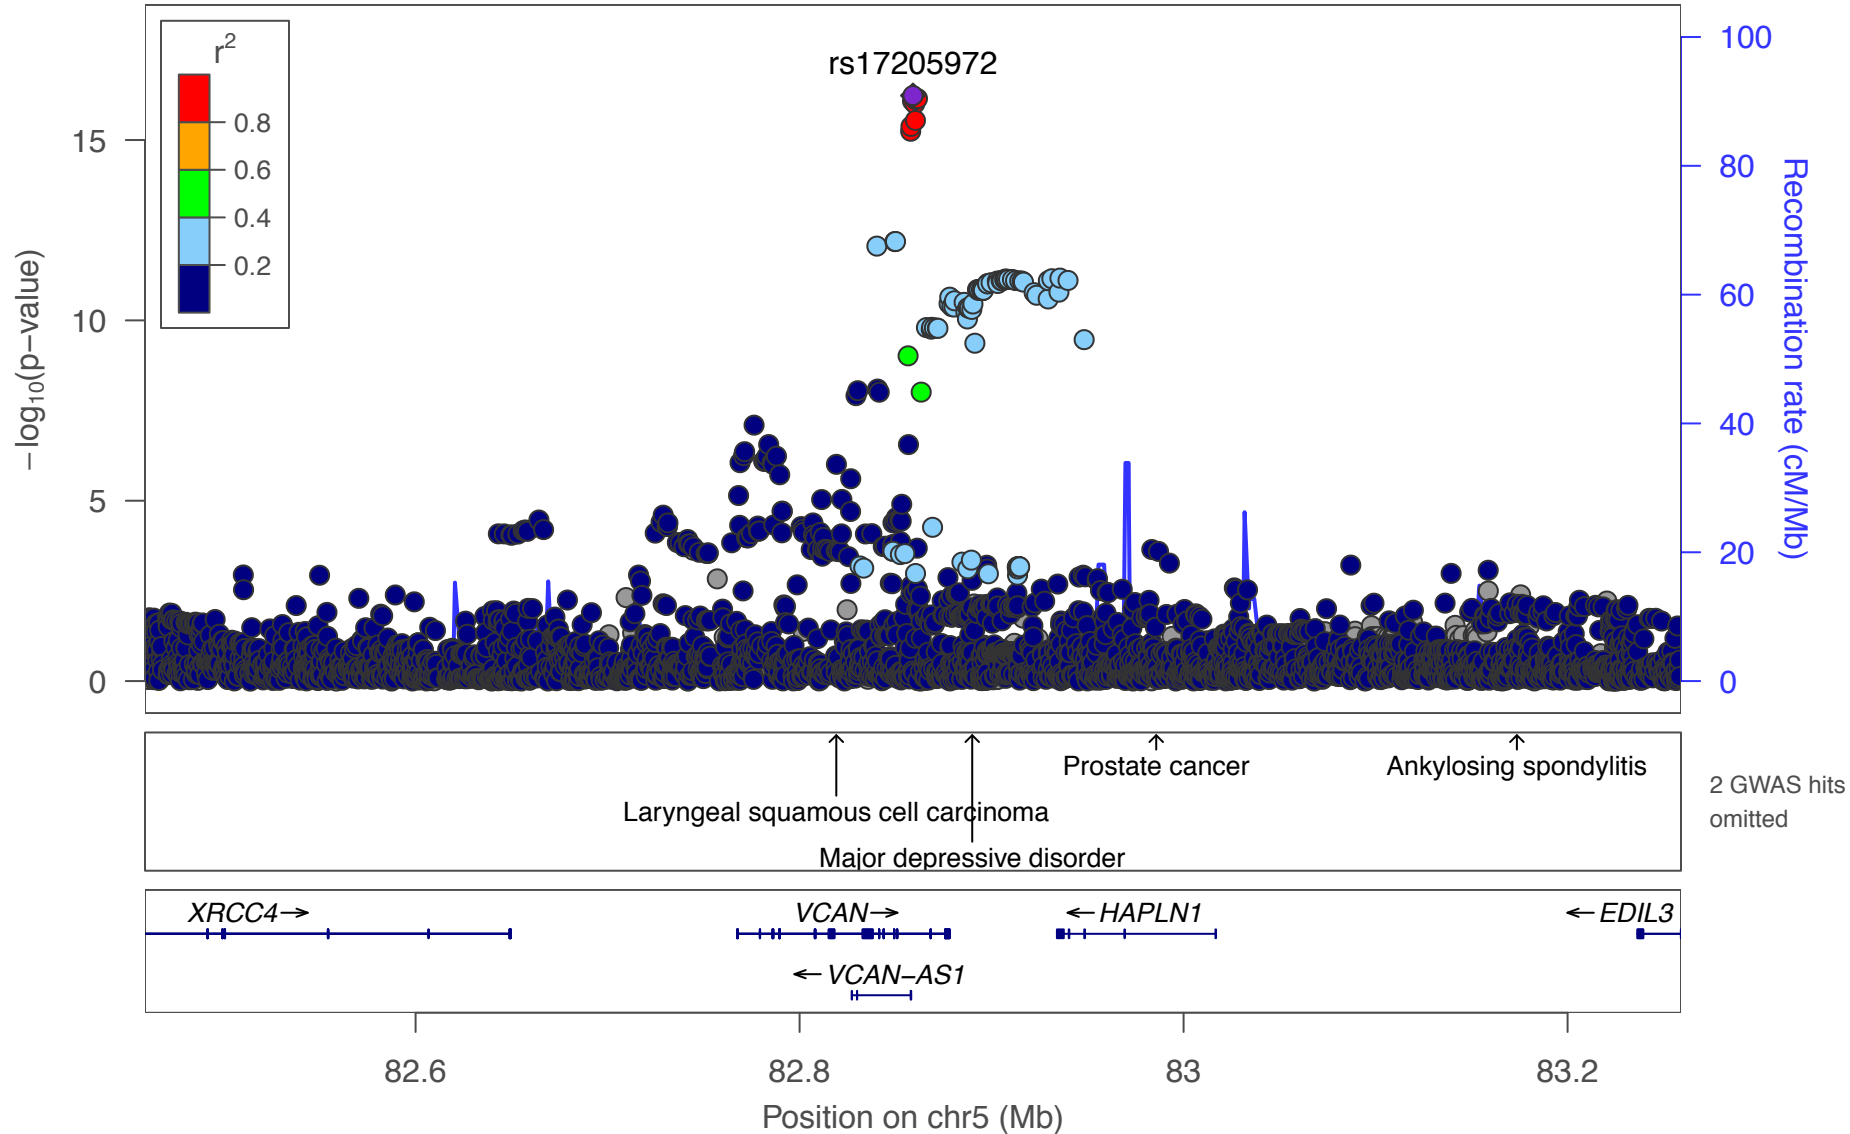

date: Thu Aug 17 17:52:01 2017

build: hg19

display range: chr5:82459065–83259065 [82459065–83259065]

hilite range: 0 – 0 [ 0 – 0 ]

reference SNP: chr5:82859065

number of SNPs plotted: 3396

min P.value: 5.85E–17 [chr5:82859065]

max P.value: 10E–1 [chr5:82513881]

omitted GWAS Hits: NA, NA

## GWAS Catalog SNPs in Region

| <b>chr</b> | <b>pos (Mb)</b> | <b>trait</b>                      | <b>snp</b> |
|------------|-----------------|-----------------------------------|------------|
| 5          | 82.81912        | Laryngeal squamous cell carcinoma | rs310518   |
| 5          | 82.84549        | Diisocyanate-induced asthma       | rs3852186  |
| 5          | 82.88991        | Major depressive disorder         | rs310501   |
| 5          | 82.96073        | Visceral fat                      | rs3846635  |
| 5          | 82.98574        | Prostate cancer                   | rs4466137  |
| 5          | 83.17359        | Ankylosing spondylitis            | rs4552569  |

# TBSS\_FA\_Splenium\_of\_corpus\_callosum

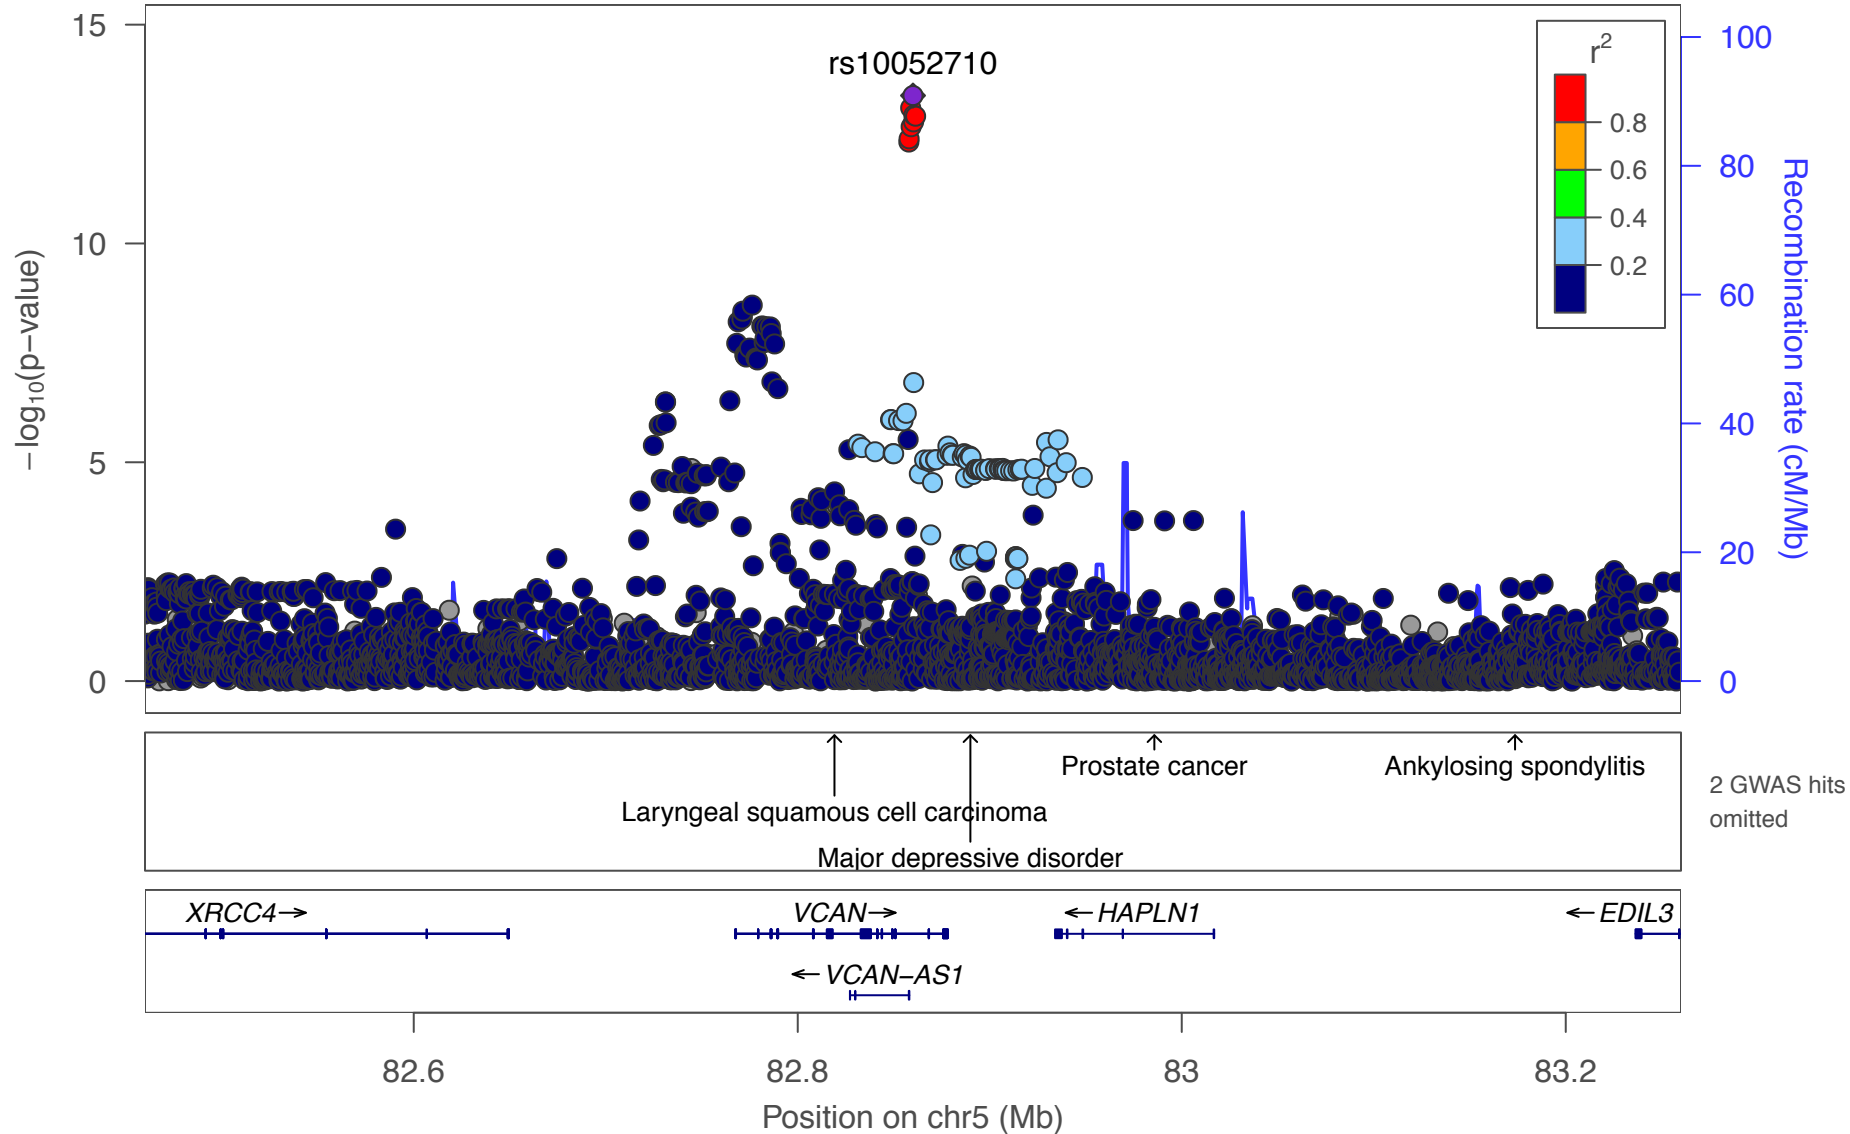

date: Thu Aug 17 17:52:01 2017

build: hg19

display range: chr5:82460025–83260025 [82460025–83260025]

hilite range: 0 – 0 [ 0 – 0 ]

reference SNP: chr5:82860025

number of SNPs plotted: 3392

min P.value: 4.17E–14 [chr5:82860025]

max P.value: 10E–1 [chr5:82950639]

omitted GWAS Hits: NA, NA

## GWAS Catalog SNPs in Region

| <b>chr</b> | <b>pos (Mb)</b> | <b>trait</b>                      | <b>snp</b> |
|------------|-----------------|-----------------------------------|------------|
| 5          | 82.81912        | Laryngeal squamous cell carcinoma | rs310518   |
| 5          | 82.84549        | Diisocyanate-induced asthma       | rs3852186  |
| 5          | 82.88991        | Major depressive disorder         | rs310501   |
| 5          | 82.96073        | Visceral fat                      | rs3846635  |
| 5          | 82.98574        | Prostate cancer                   | rs4466137  |
| 5          | 83.17359        | Ankylosing spondylitis            | rs4552569  |

# TBSS\_FA\_Retrolenticular\_part\_of\_internal\_capsule\_L

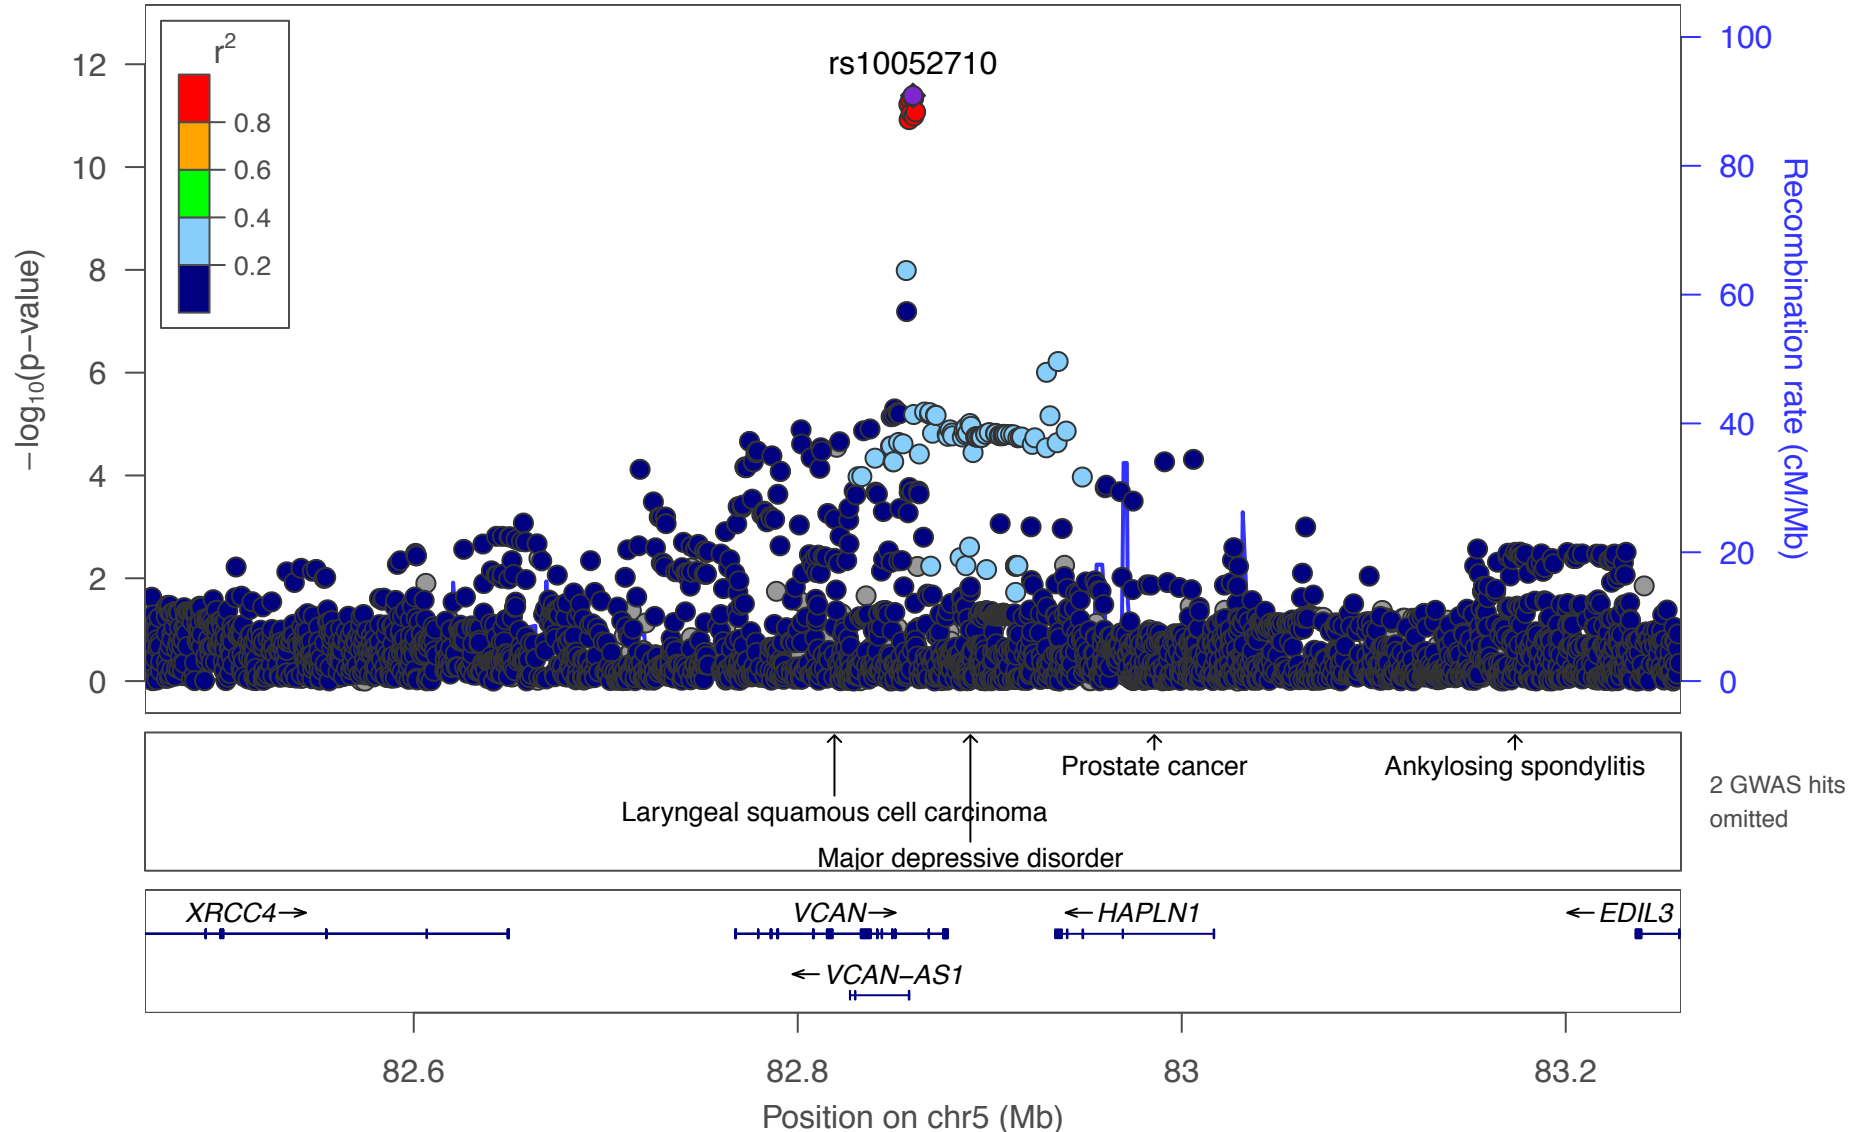

date: Thu Aug 17 17:52:01 2017

build: hg19

display range: chr5:82460025–83260025 [82460025–83260025]

hilite range: 0 – 0 [ 0 – 0 ]

reference SNP: chr5:82860025

number of SNPs plotted: 3392

min P.value: 4.06E–12 [chr5:82860025]

max P.value: 10E–1 [chr5:82936267]

omitted GWAS Hits: NA, NA



## GWAS Catalog SNPs in Region

| <b>chr</b> | <b>pos (Mb)</b> | <b>trait</b>                      | <b>snp</b> |
|------------|-----------------|-----------------------------------|------------|
| 5          | 82.81912        | Laryngeal squamous cell carcinoma | rs310518   |
| 5          | 82.84549        | Diisocyanate-induced asthma       | rs3852186  |
| 5          | 82.88991        | Major depressive disorder         | rs310501   |
| 5          | 82.96073        | Visceral fat                      | rs3846635  |
| 5          | 82.98574        | Prostate cancer                   | rs4466137  |
| 5          | 83.17359        | Ankylosing spondylitis            | rs4552569  |

# TBSS\_FA\_Posterior\_thalamic\_radiation\_R

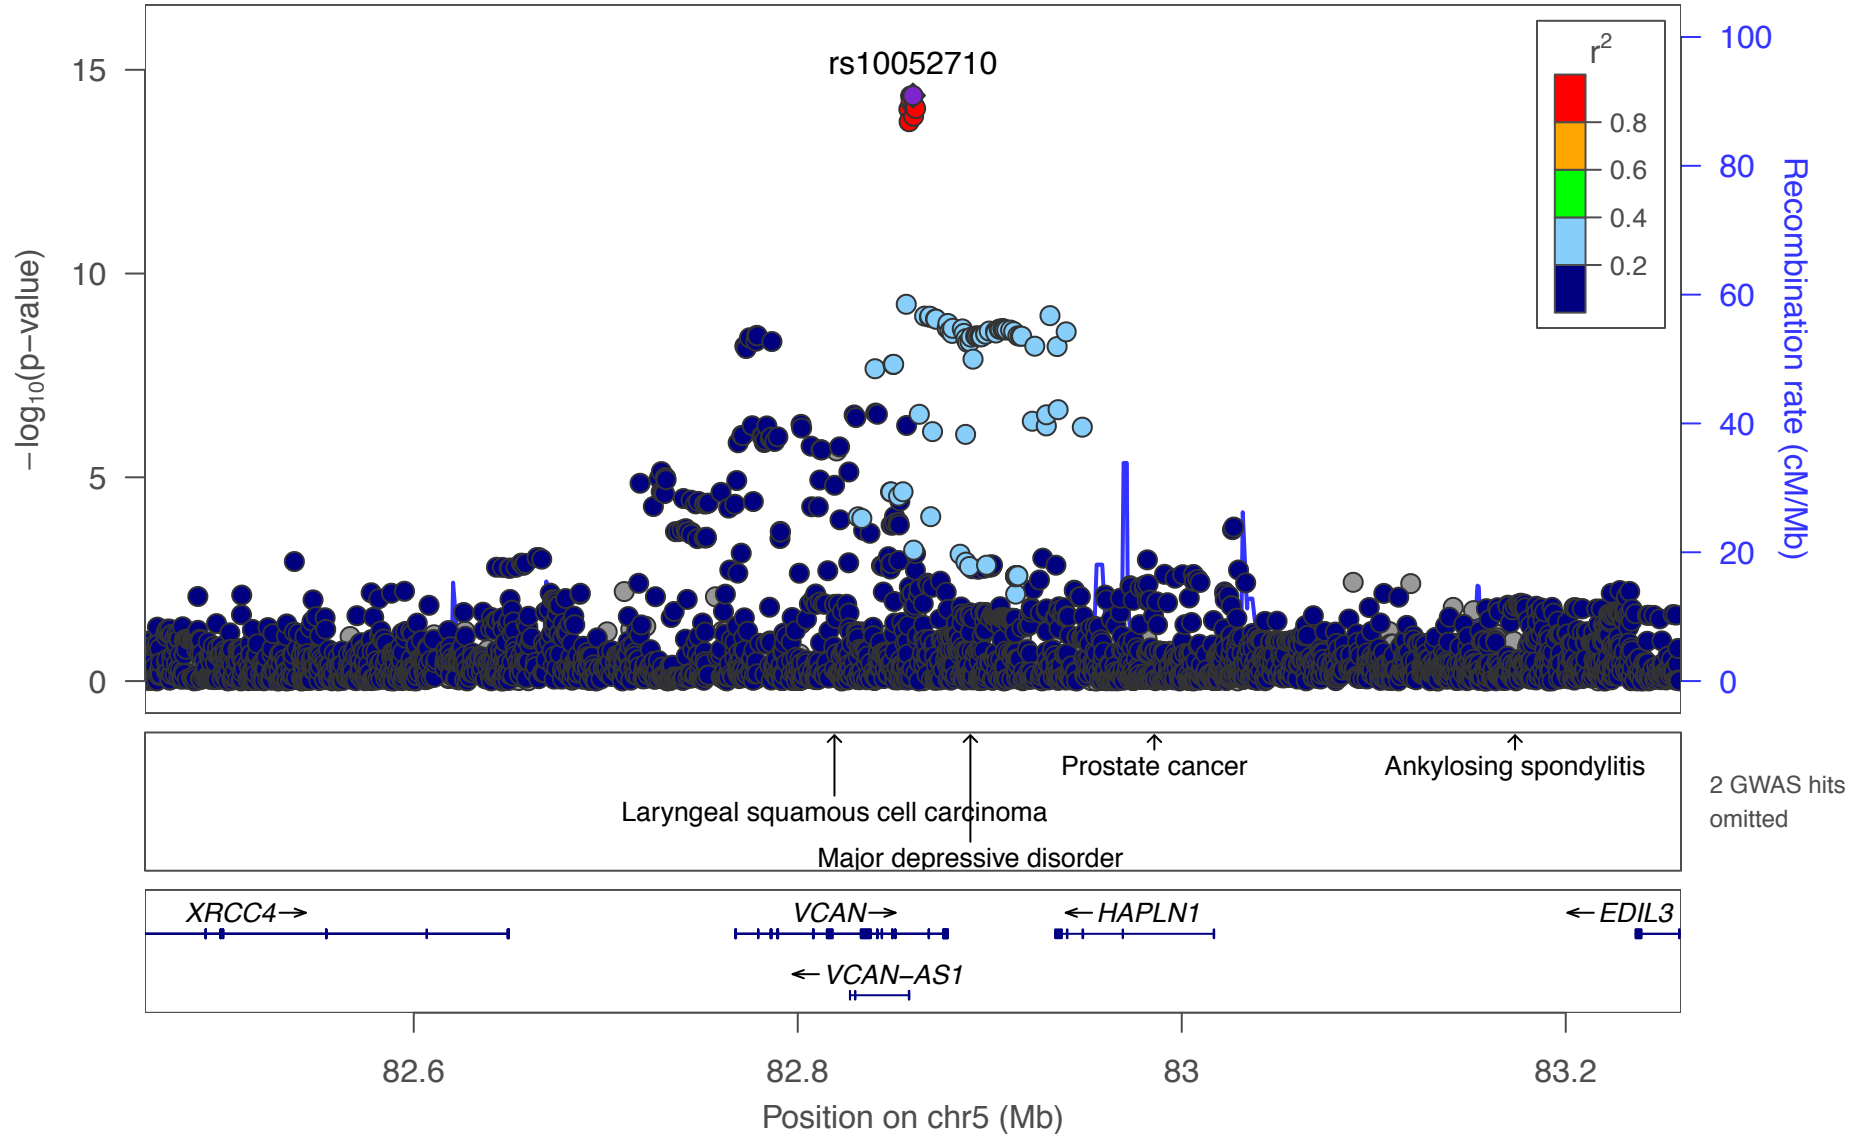

date: Thu Aug 17 17:52:01 2017

build: hg19

display range: chr5:82460025–83260025 [82460025–83260025]

hilite range: 0 – 0 [ 0 – 0 ]

reference SNP: chr5:82860025

number of SNPs plotted: 3392

min P.value: 4.29E–15 [chr5:82860025]

max P.value: 10E–1 [chr5:83220371]

omitted GWAS Hits: NA, NA

## GWAS Catalog SNPs in Region

| <b>chr</b> | <b>pos (Mb)</b> | <b>trait</b>                      | <b>snp</b> |
|------------|-----------------|-----------------------------------|------------|
| 5          | 82.81912        | Laryngeal squamous cell carcinoma | rs310518   |
| 5          | 82.84549        | Diisocyanate-induced asthma       | rs3852186  |
| 5          | 82.88991        | Major depressive disorder         | rs310501   |
| 5          | 82.96073        | Visceral fat                      | rs3846635  |
| 5          | 82.98574        | Prostate cancer                   | rs4466137  |
| 5          | 83.17359        | Ankylosing spondylitis            | rs4552569  |

# TBSS\_FA\_Posterior\_thalamic\_radiation\_L

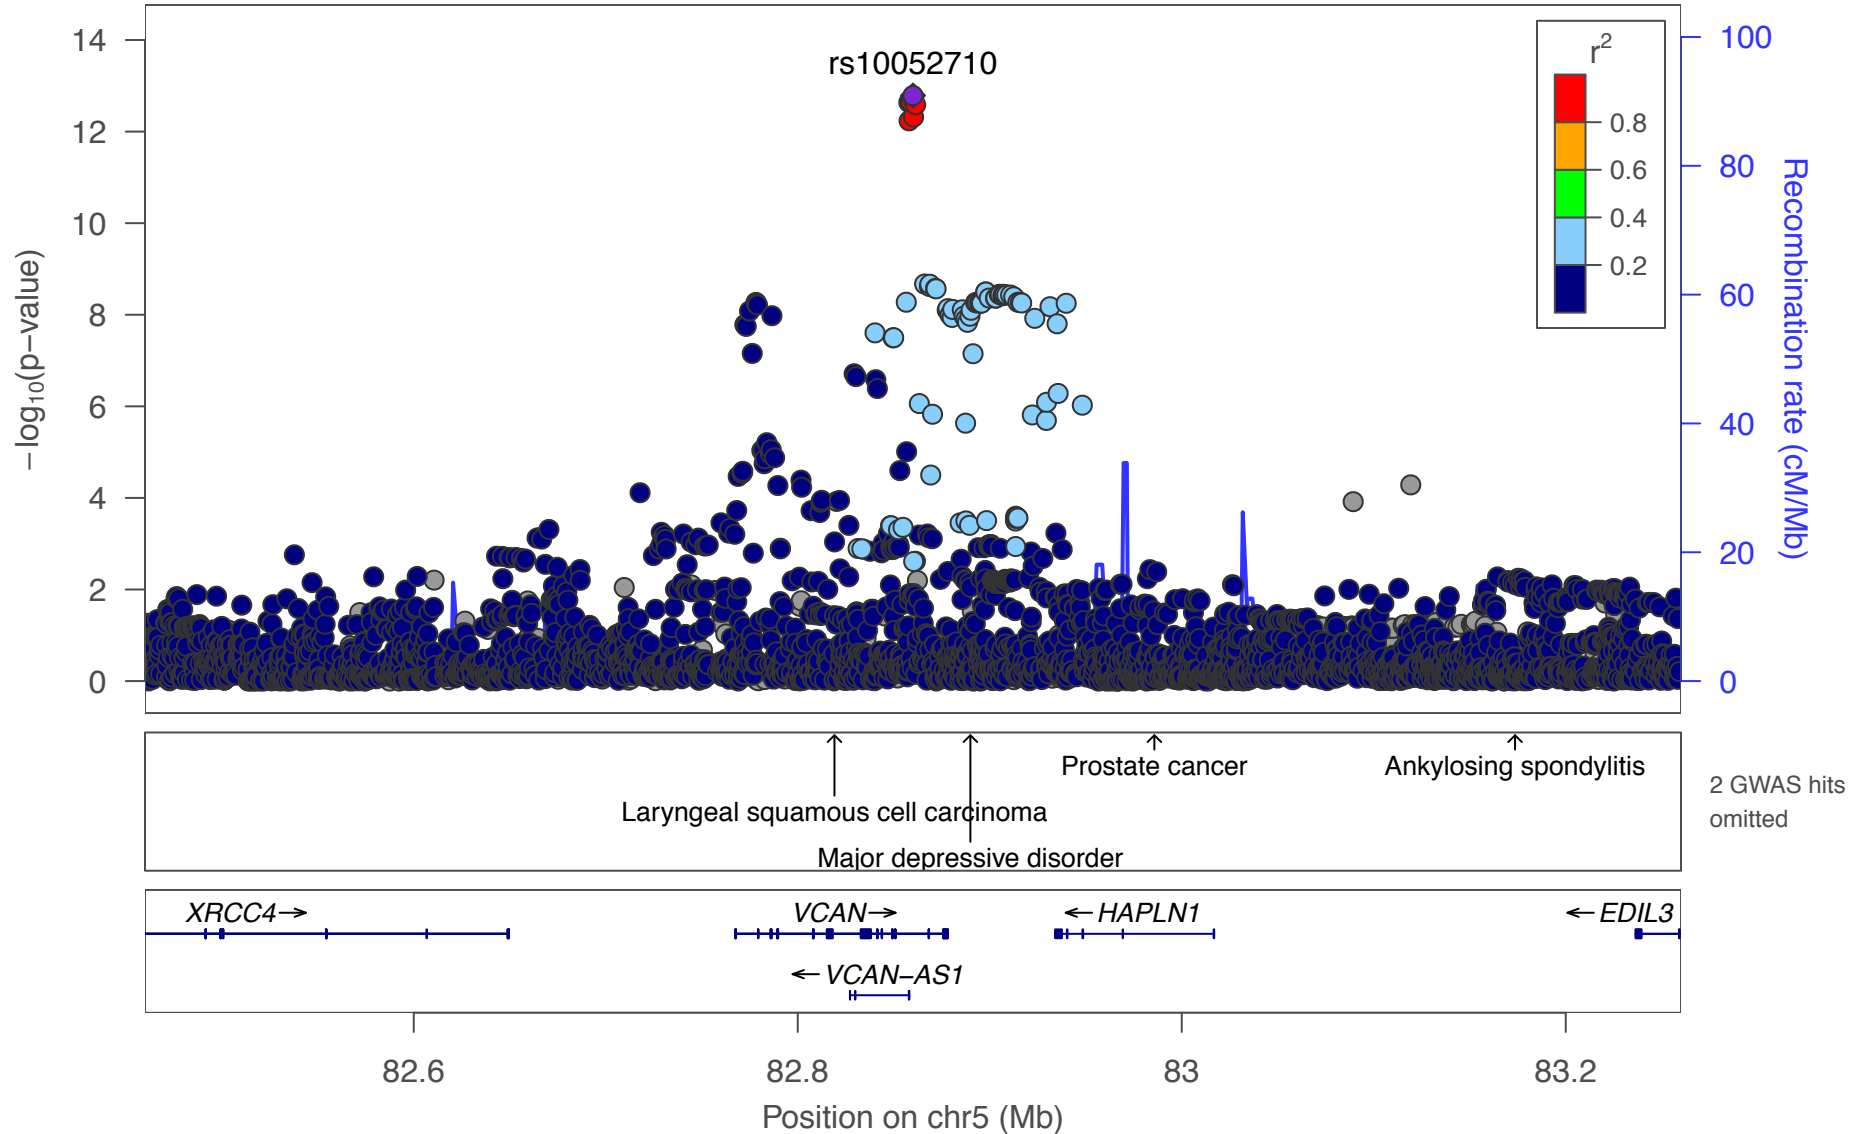

date: Thu Aug 17 17:52:01 2017

build: hg19

display range: chr5:82460025–83260025 [82460025–83260025]

hilite range: 0 – 0 [ 0 – 0 ]

reference SNP: chr5:82860025

number of SNPs plotted: 3392

min P.value: 1.63E–13 [chr5:82860025]

max P.value: 10E–1 [chr5:82974539]

omitted GWAS Hits: NA, NA

## GWAS Catalog SNPs in Region

| <b>chr</b> | <b>pos (Mb)</b> | <b>trait</b>                      | <b>snp</b> |
|------------|-----------------|-----------------------------------|------------|
| 5          | 82.81912        | Laryngeal squamous cell carcinoma | rs310518   |
| 5          | 82.84549        | Diisocyanate-induced asthma       | rs3852186  |
| 5          | 82.88991        | Major depressive disorder         | rs310501   |
| 5          | 82.96073        | Visceral fat                      | rs3846635  |
| 5          | 82.98574        | Prostate cancer                   | rs4466137  |
| 5          | 83.17359        | Ankylosing spondylitis            | rs4552569  |

# TBSS\_FA\_Sagittal\_stratum\_R

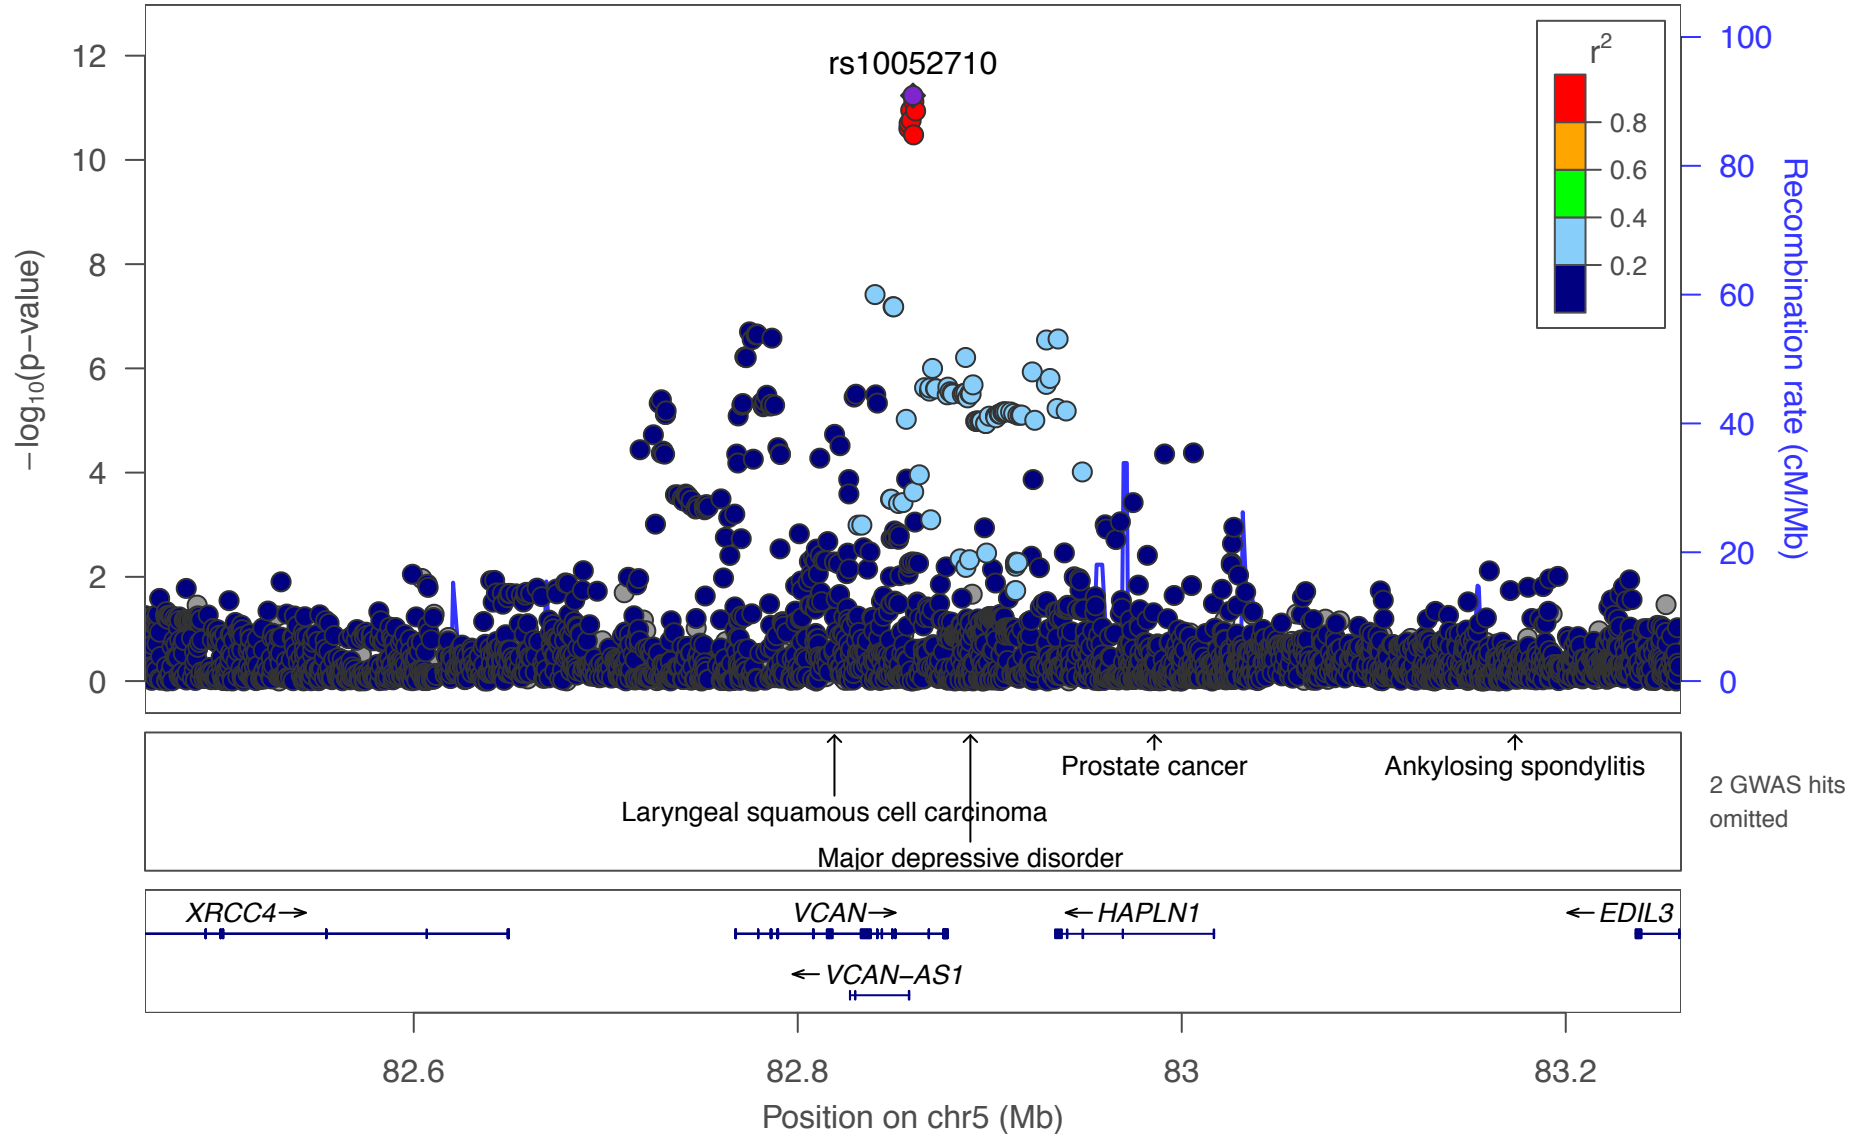



date: Thu Aug 17 17:52:01 2017

build: hg19

display range: chr5:82460025–83260025 [82460025–83260025]

hilite range: 0 – 0 [ 0 – 0 ]

reference SNP: chr5:82860025

number of SNPs plotted: 3392

min P.value: 5.82E–12 [chr5:82860025]

max P.value: 10E–1 [chr5:82777519]

omitted GWAS Hits: NA, NA

## GWAS Catalog SNPs in Region

| <b>chr</b> | <b>pos (Mb)</b> | <b>trait</b>                      | <b>snp</b> |
|------------|-----------------|-----------------------------------|------------|
| 5          | 82.81912        | Laryngeal squamous cell carcinoma | rs310518   |
| 5          | 82.84549        | Diisocyanate-induced asthma       | rs3852186  |
| 5          | 82.88991        | Major depressive disorder         | rs310501   |
| 5          | 82.96073        | Visceral fat                      | rs3846635  |
| 5          | 82.98574        | Prostate cancer                   | rs4466137  |
| 5          | 83.17359        | Ankylosing spondylitis            | rs4552569  |

# TBSS\_MD\_Inferior\_cerebellar\_peduncle\_R

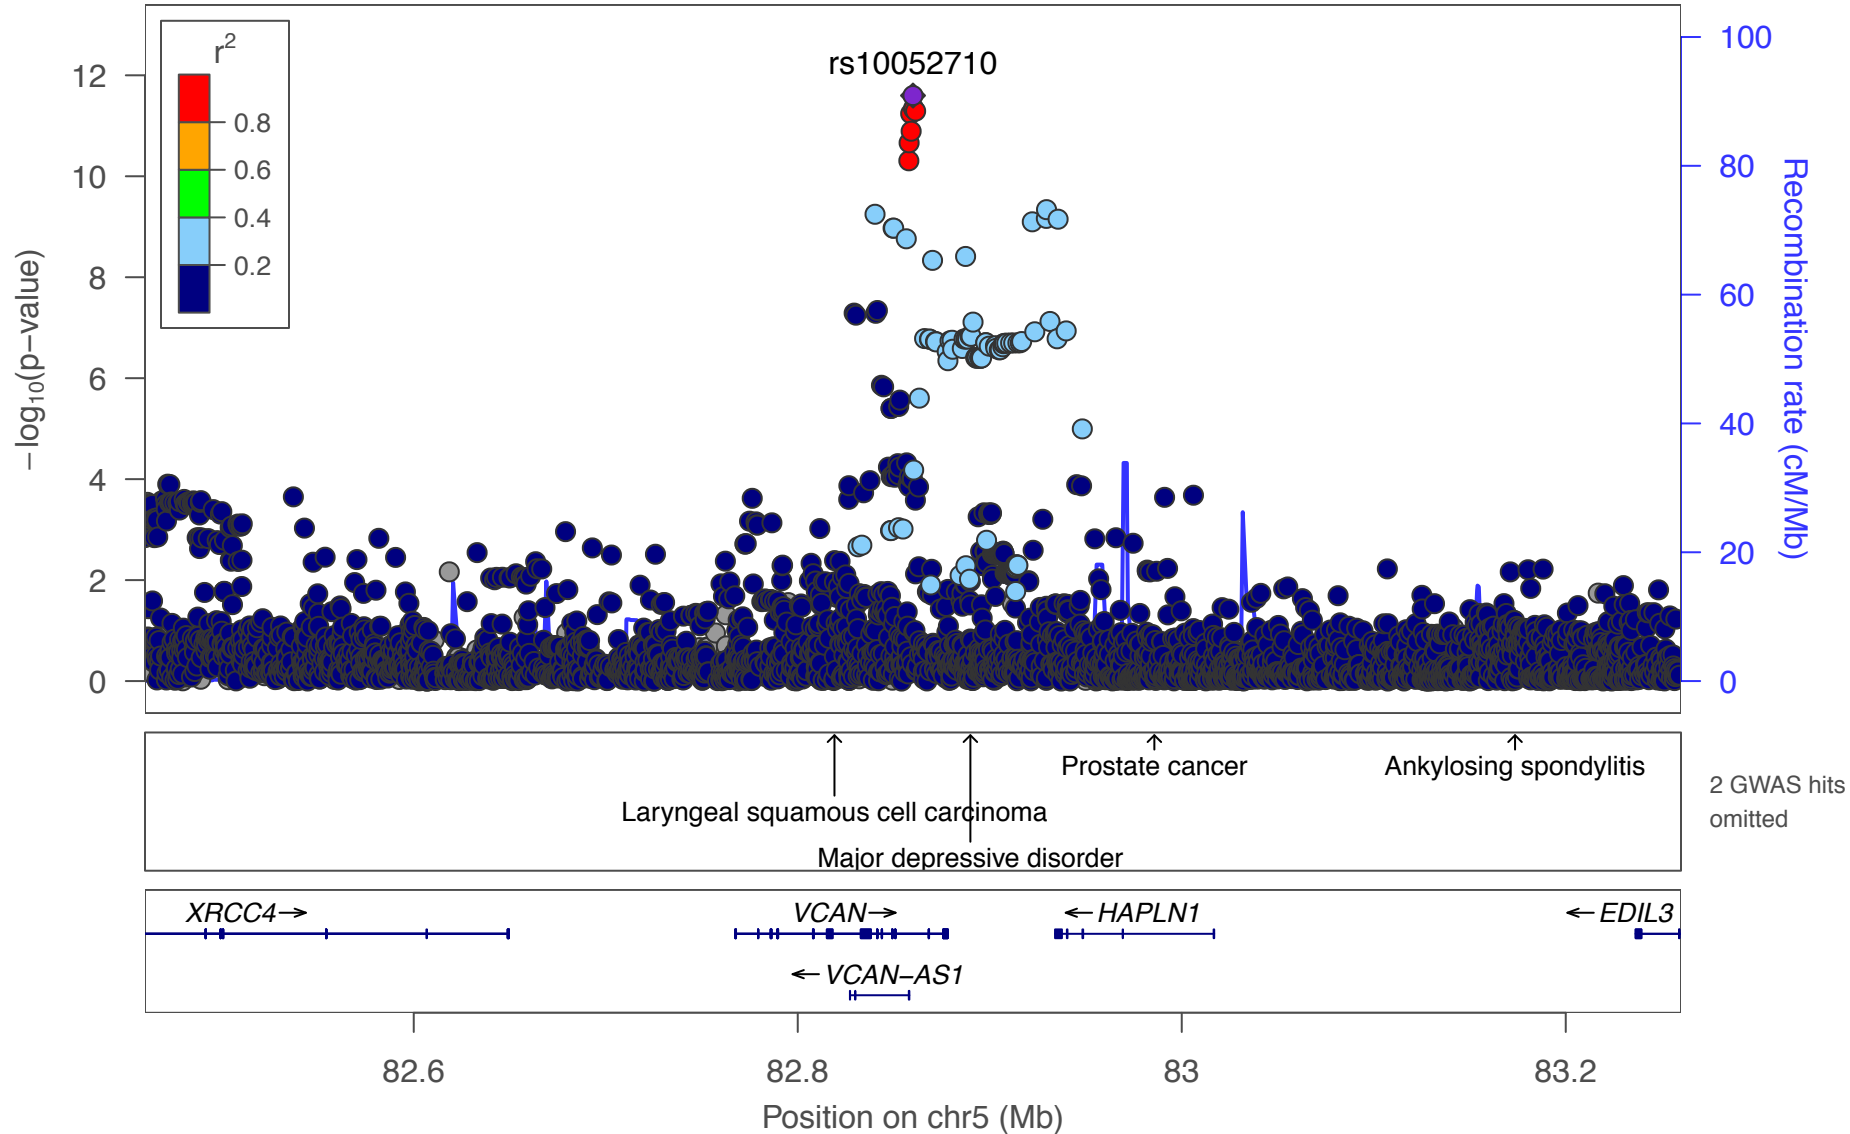

date: Thu Aug 17 17:52:01 2017

build: hg19

display range: chr5:82460025–83260025 [82460025–83260025]

hilite range: 0 – 0 [ 0 – 0 ]

reference SNP: chr5:82860025

number of SNPs plotted: 3392

min P.value: 2.52E–12 [chr5:82860025]

max P.value: 10E–1 [chr5:82607038]

omitted GWAS Hits: NA, NA

## GWAS Catalog SNPs in Region

| <b>chr</b> | <b>pos (Mb)</b> | <b>trait</b>                      | <b>snp</b> |
|------------|-----------------|-----------------------------------|------------|
| 5          | 82.81912        | Laryngeal squamous cell carcinoma | rs310518   |
| 5          | 82.84549        | Diisocyanate-induced asthma       | rs3852186  |
| 5          | 82.88991        | Major depressive disorder         | rs310501   |
| 5          | 82.96073        | Visceral fat                      | rs3846635  |
| 5          | 82.98574        | Prostate cancer                   | rs4466137  |
| 5          | 83.17359        | Ankylosing spondylitis            | rs4552569  |

# TBSS\_MD\_Retrolenticular\_part\_of\_internal\_capsule\_R

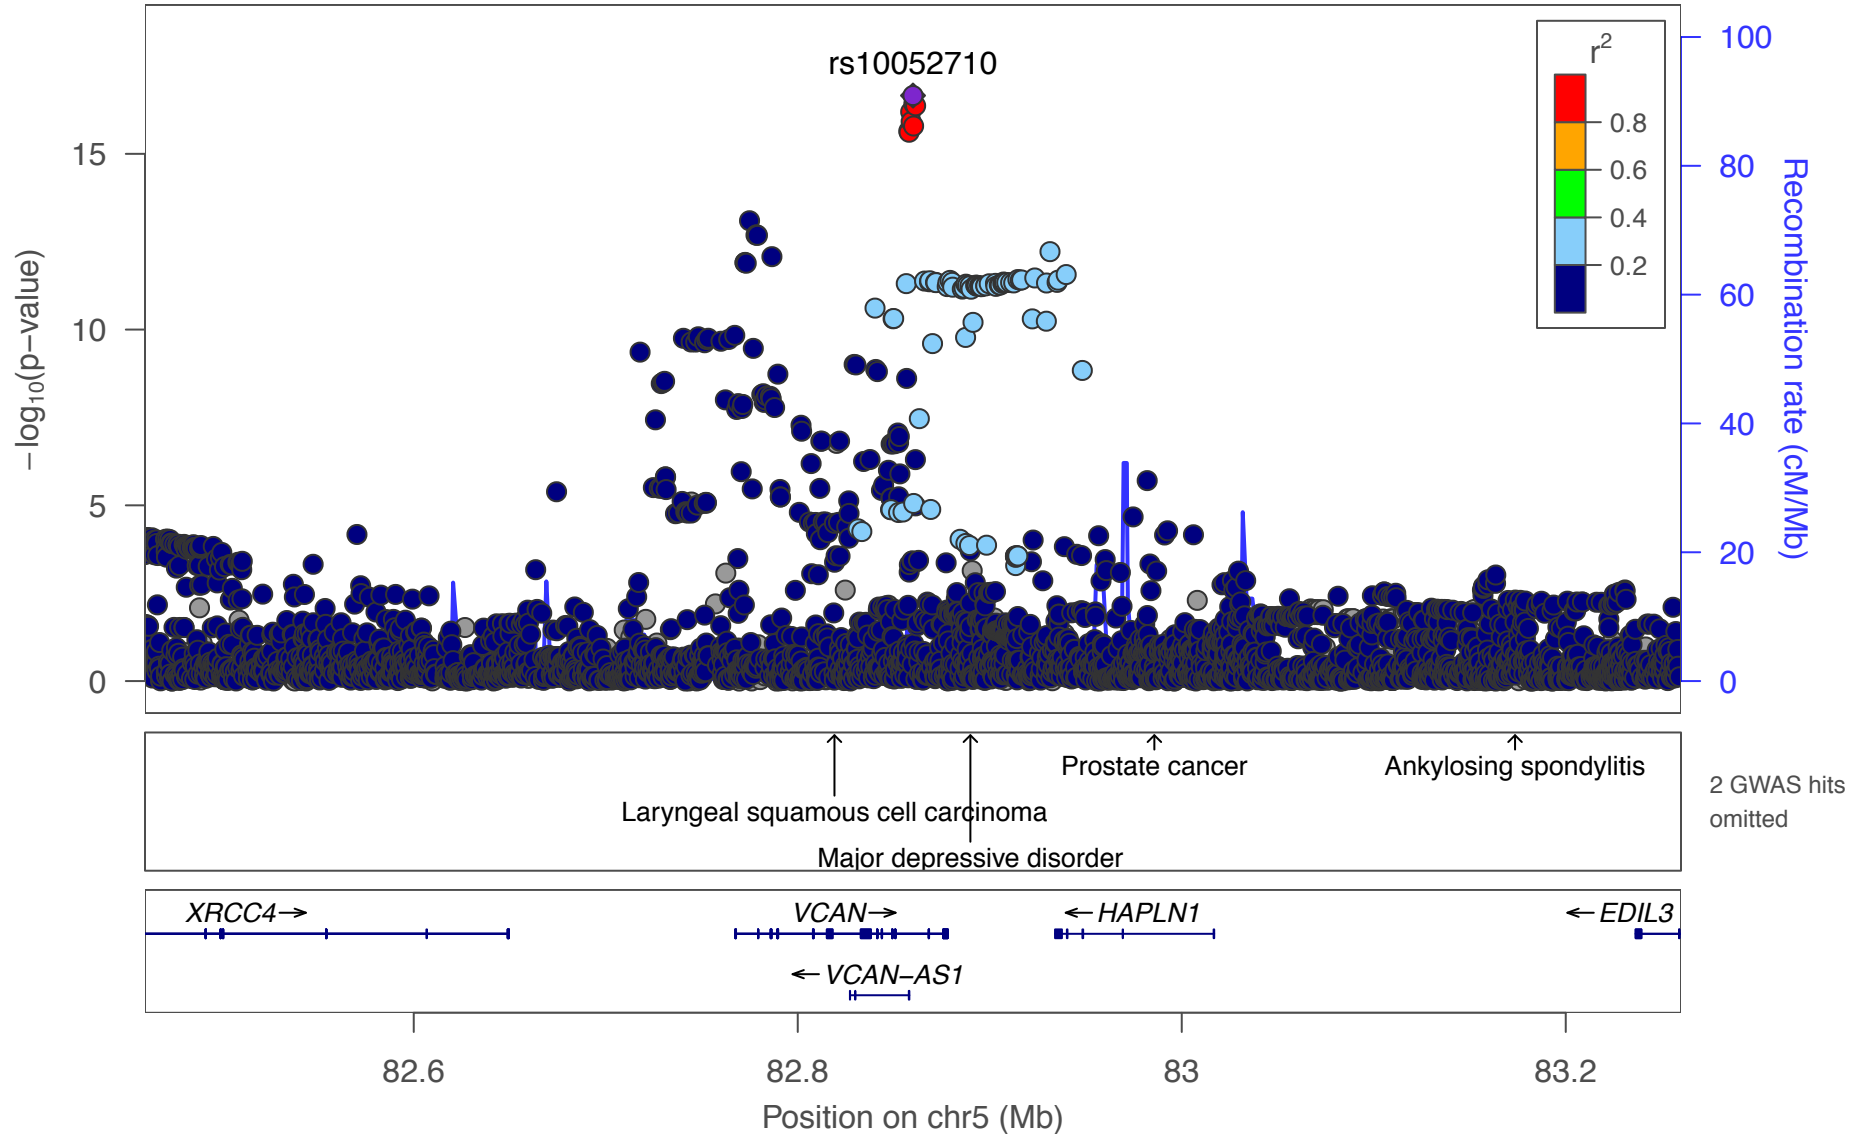

date: Thu Aug 17 17:52:01 2017

build: hg19

display range: chr5:82460025–83260025 [82460025–83260025]

hilite range: 0 – 0 [ 0 – 0 ]

reference SNP: chr5:82860025

number of SNPs plotted: 3392

min P.value: 2.2E–17 [chr5:82860025]

max P.value: 10E–1 [chr5:83082527]

omitted GWAS Hits: NA, NA

## GWAS Catalog SNPs in Region

| <b>chr</b> | <b>pos (Mb)</b> | <b>trait</b>                      | <b>snp</b> |
|------------|-----------------|-----------------------------------|------------|
| 5          | 82.81912        | Laryngeal squamous cell carcinoma | rs310518   |
| 5          | 82.84549        | Diisocyanate-induced asthma       | rs3852186  |
| 5          | 82.88991        | Major depressive disorder         | rs310501   |
| 5          | 82.96073        | Visceral fat                      | rs3846635  |
| 5          | 82.98574        | Prostate cancer                   | rs4466137  |
| 5          | 83.17359        | Ankylosing spondylitis            | rs4552569  |



# TBSS\_MD\_Retrolenticular\_part\_of\_internal\_capsule\_L

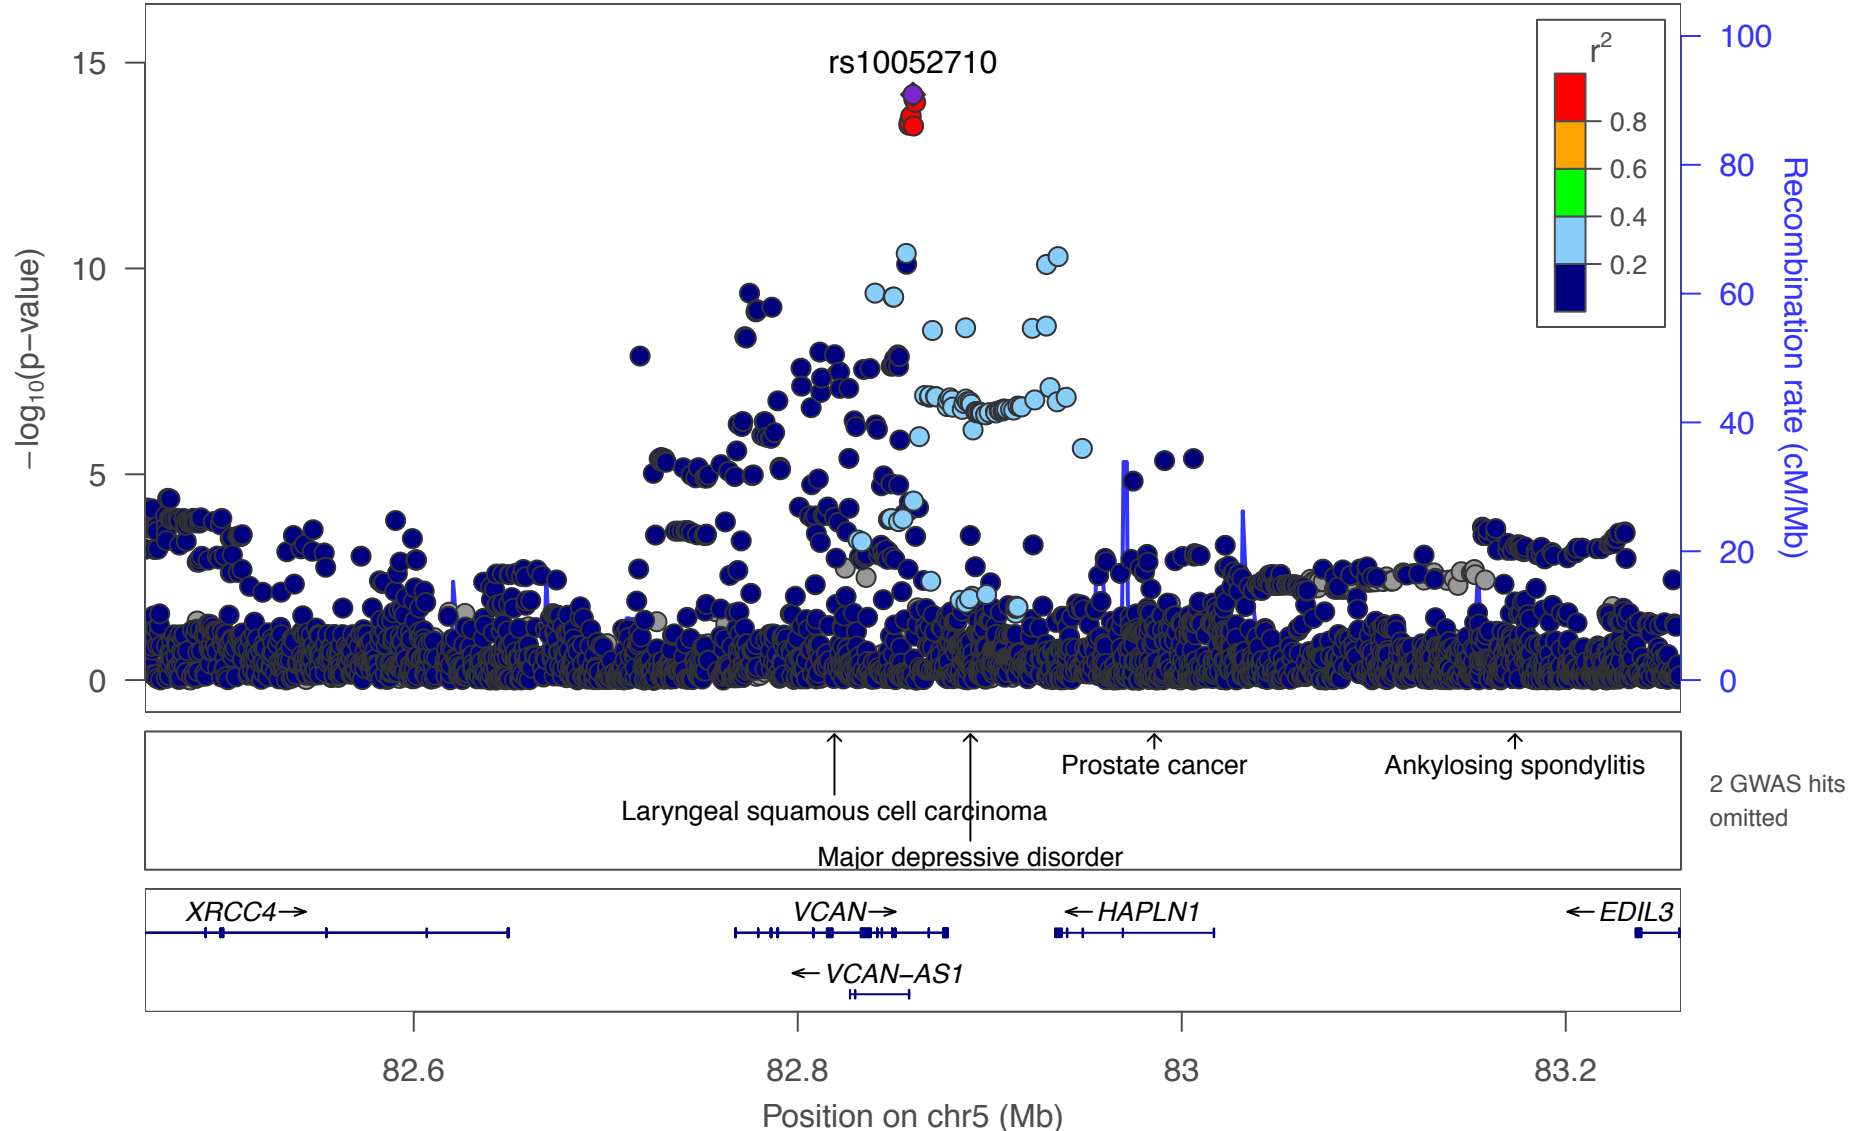

date: Thu Aug 17 17:52:01 2017

build: hg19

display range: chr5:82460025–83260025 [82460025–83260025]

hilite range: 0 – 0 [ 0 – 0 ]

reference SNP: chr5:82860025

number of SNPs plotted: 3392

min P.value: 5.96E–15 [chr5:82860025]

max P.value: 9.99E–1 [chr5:82720045]

omitted GWAS Hits: NA, NA

## GWAS Catalog SNPs in Region

| <b>chr</b> | <b>pos (Mb)</b> | <b>trait</b>                      | <b>snp</b> |
|------------|-----------------|-----------------------------------|------------|
| 5          | 82.81912        | Laryngeal squamous cell carcinoma | rs310518   |
| 5          | 82.84549        | Diisocyanate-induced asthma       | rs3852186  |
| 5          | 82.88991        | Major depressive disorder         | rs310501   |
| 5          | 82.96073        | Visceral fat                      | rs3846635  |
| 5          | 82.98574        | Prostate cancer                   | rs4466137  |
| 5          | 83.17359        | Ankylosing spondylitis            | rs4552569  |

# TBSS\_MD\_Posterior\_corona\_radiata\_L

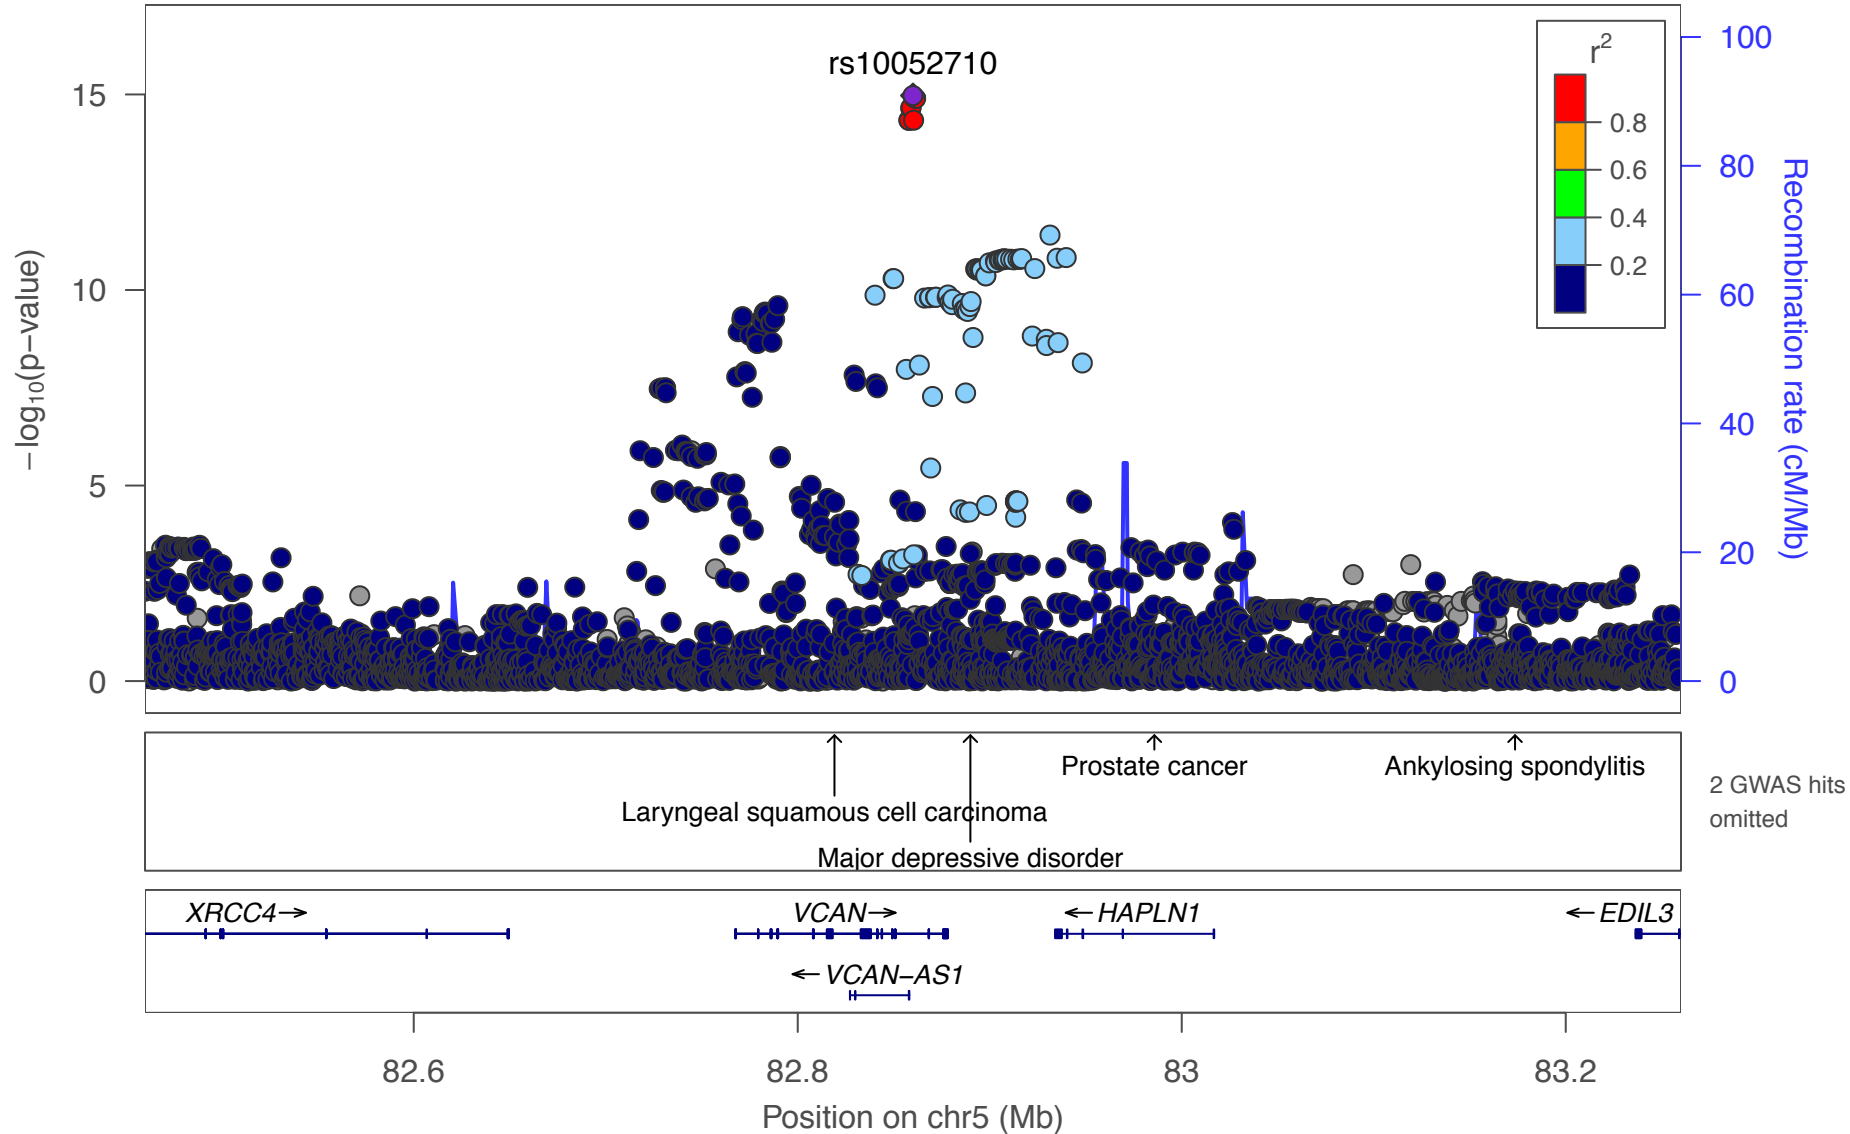

date: Thu Aug 17 17:52:01 2017

build: hg19

display range: chr5:82460025–83260025 [82460025–83260025]

hilite range: 0 – 0 [ 0 – 0 ]

reference SNP: chr5:82860025

number of SNPs plotted: 3392

min P.value: 1.07E–15 [chr5:82860025]

max P.value: 10E–1 [chr5:83072612]

omitted GWAS Hits: NA, NA

## GWAS Catalog SNPs in Region

| <b>chr</b> | <b>pos (Mb)</b> | <b>trait</b>                      | <b>snp</b> |
|------------|-----------------|-----------------------------------|------------|
| 5          | 82.81912        | Laryngeal squamous cell carcinoma | rs310518   |
| 5          | 82.84549        | Diisocyanate-induced asthma       | rs3852186  |
| 5          | 82.88991        | Major depressive disorder         | rs310501   |
| 5          | 82.96073        | Visceral fat                      | rs3846635  |
| 5          | 82.98574        | Prostate cancer                   | rs4466137  |
| 5          | 83.17359        | Ankylosing spondylitis            | rs4552569  |

# TBSS\_MD\_Posterior\_thalamic\_radiation\_R

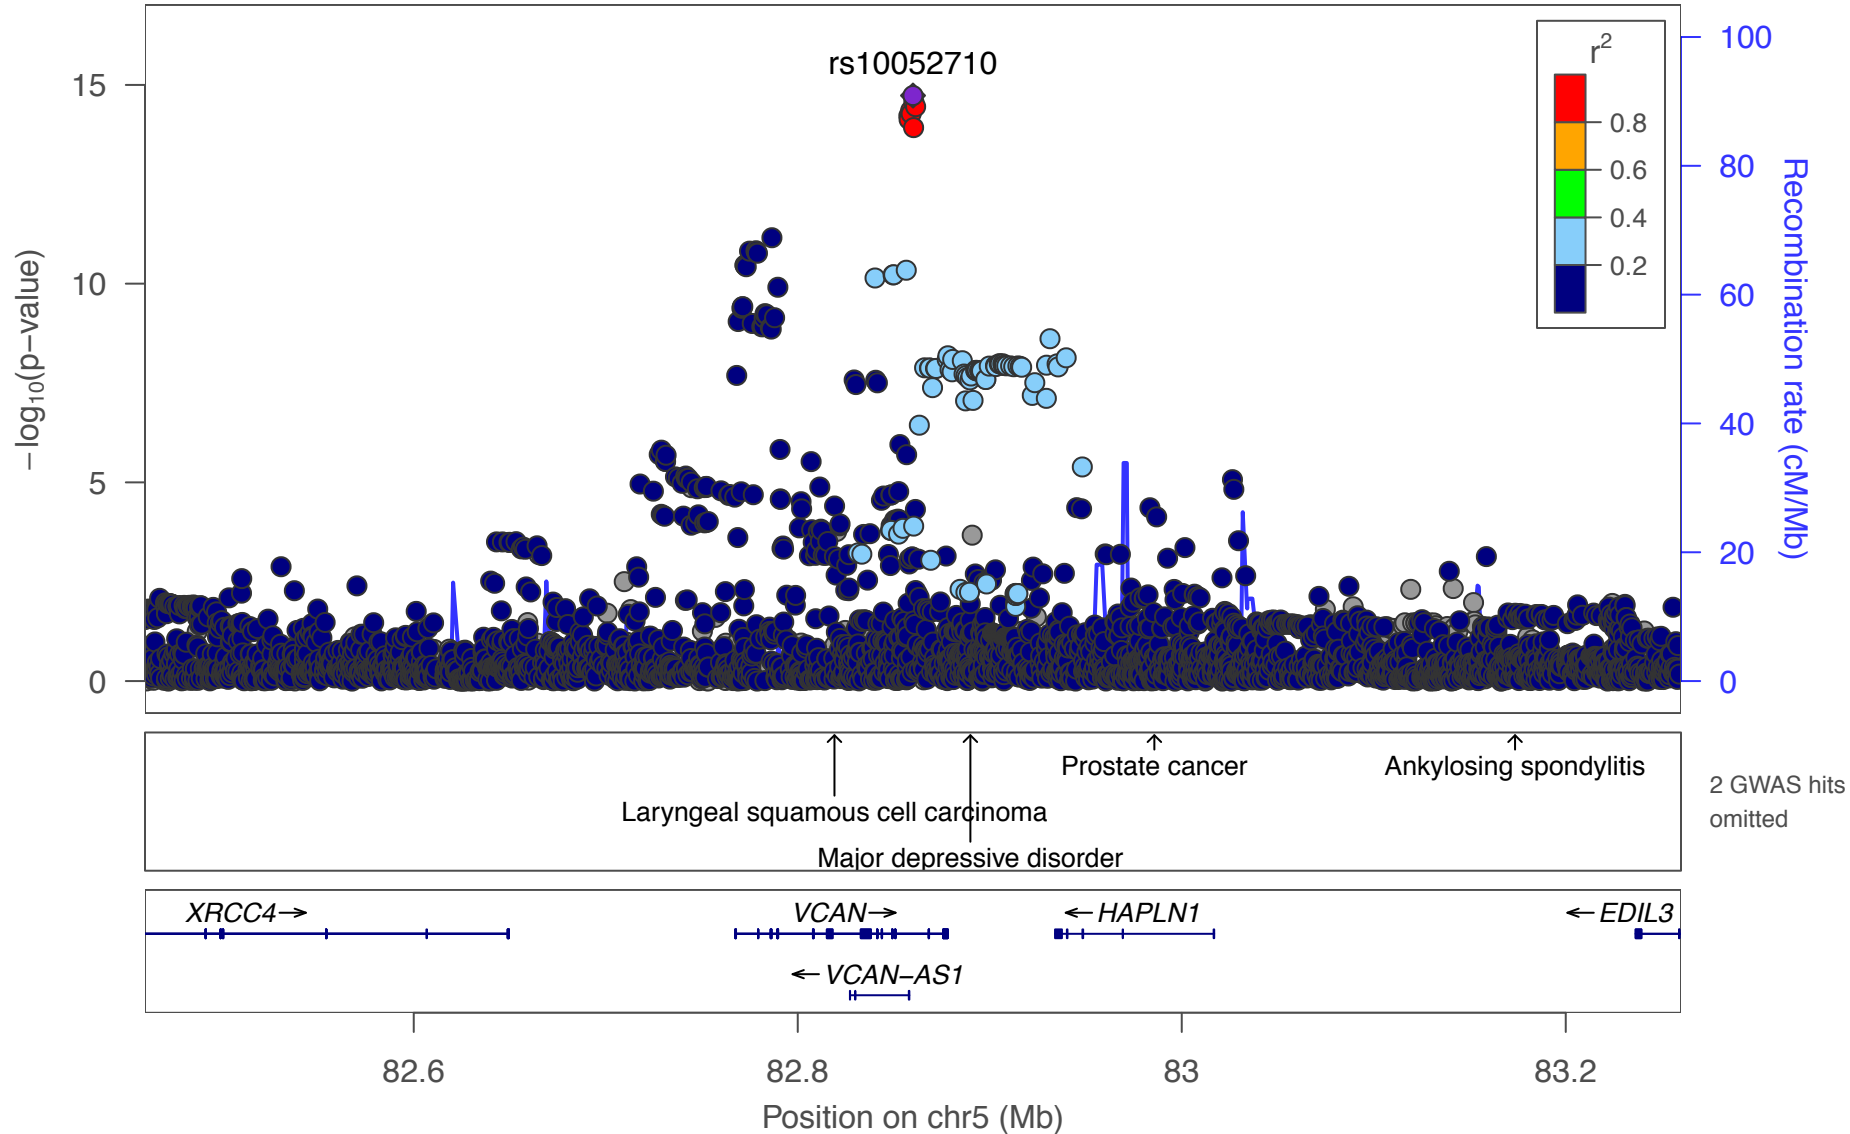

date: Thu Aug 17 17:52:01 2017

build: hg19

display range: chr5:82460025–83260025 [82460025–83260025]

hilite range: 0 – 0 [ 0 – 0 ]

reference SNP: chr5:82860025

number of SNPs plotted: 3392

min P.value: 1.85E–15 [chr5:82860025]

max P.value: 10E–1 [chr5:82472156]

omitted GWAS Hits: NA, NA



## GWAS Catalog SNPs in Region

| <b>chr</b> | <b>pos (Mb)</b> | <b>trait</b>                      | <b>snp</b> |
|------------|-----------------|-----------------------------------|------------|
| 5          | 82.81912        | Laryngeal squamous cell carcinoma | rs310518   |
| 5          | 82.84549        | Diisocyanate-induced asthma       | rs3852186  |
| 5          | 82.88991        | Major depressive disorder         | rs310501   |
| 5          | 82.96073        | Visceral fat                      | rs3846635  |
| 5          | 82.98574        | Prostate cancer                   | rs4466137  |
| 5          | 83.17359        | Ankylosing spondylitis            | rs4552569  |

# TBSS\_MD\_Superior\_longitudinal\_fasciculus\_R

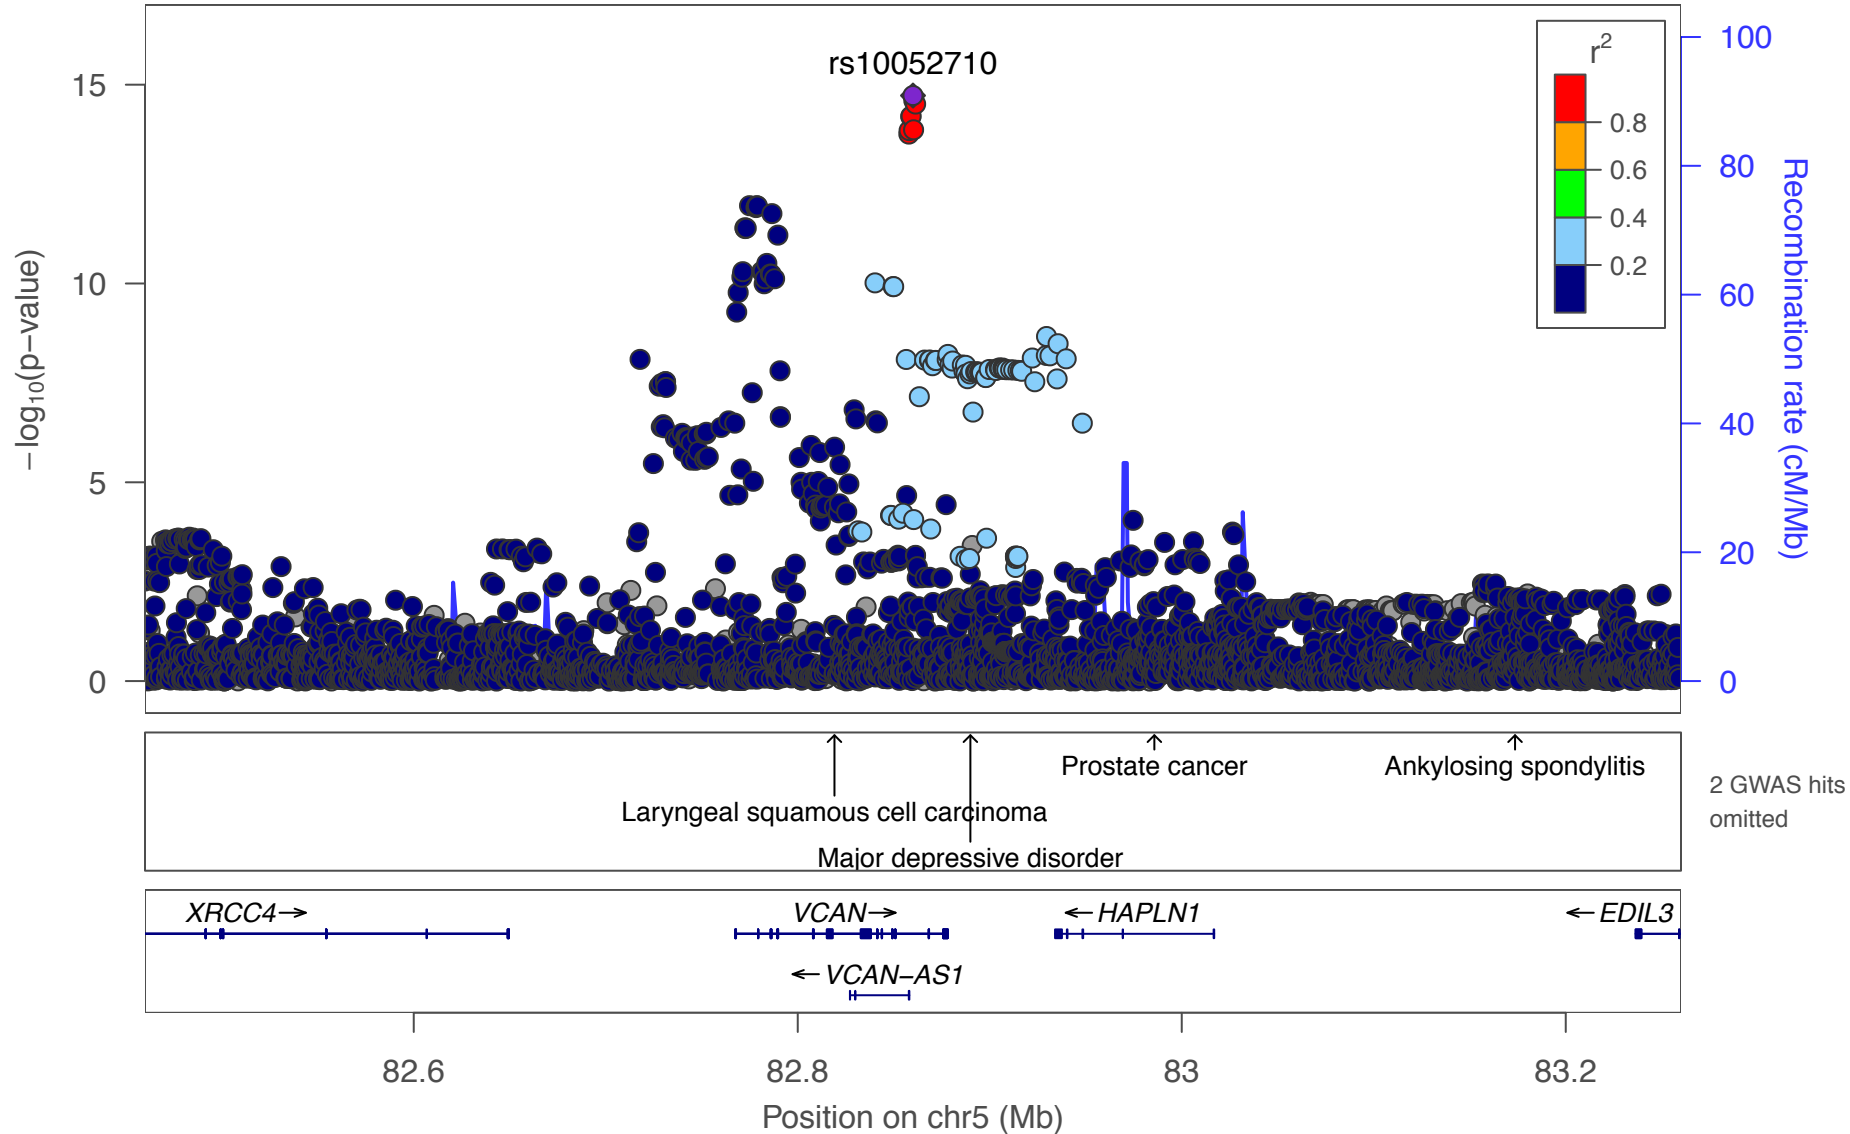

date: Thu Aug 17 17:52:01 2017

build: hg19

display range: chr5:82460025–83260025 [82460025–83260025]

hilite range: 0 – 0 [ 0 – 0 ]

reference SNP: chr5:82860025

number of SNPs plotted: 3392

min P.value: 1.87E–15 [chr5:82860025]

max P.value: 9.99E–1 [chr5:82609092]

omitted GWAS Hits: NA, NA

## GWAS Catalog SNPs in Region

| <b>chr</b> | <b>pos (Mb)</b> | <b>trait</b>                      | <b>snp</b> |
|------------|-----------------|-----------------------------------|------------|
| 5          | 82.81912        | Laryngeal squamous cell carcinoma | rs310518   |
| 5          | 82.84549        | Diisocyanate-induced asthma       | rs3852186  |
| 5          | 82.88991        | Major depressive disorder         | rs310501   |
| 5          | 82.96073        | Visceral fat                      | rs3846635  |
| 5          | 82.98574        | Prostate cancer                   | rs4466137  |
| 5          | 83.17359        | Ankylosing spondylitis            | rs4552569  |

# TBSS\_MD\_Uncinate\_fasciculus\_R

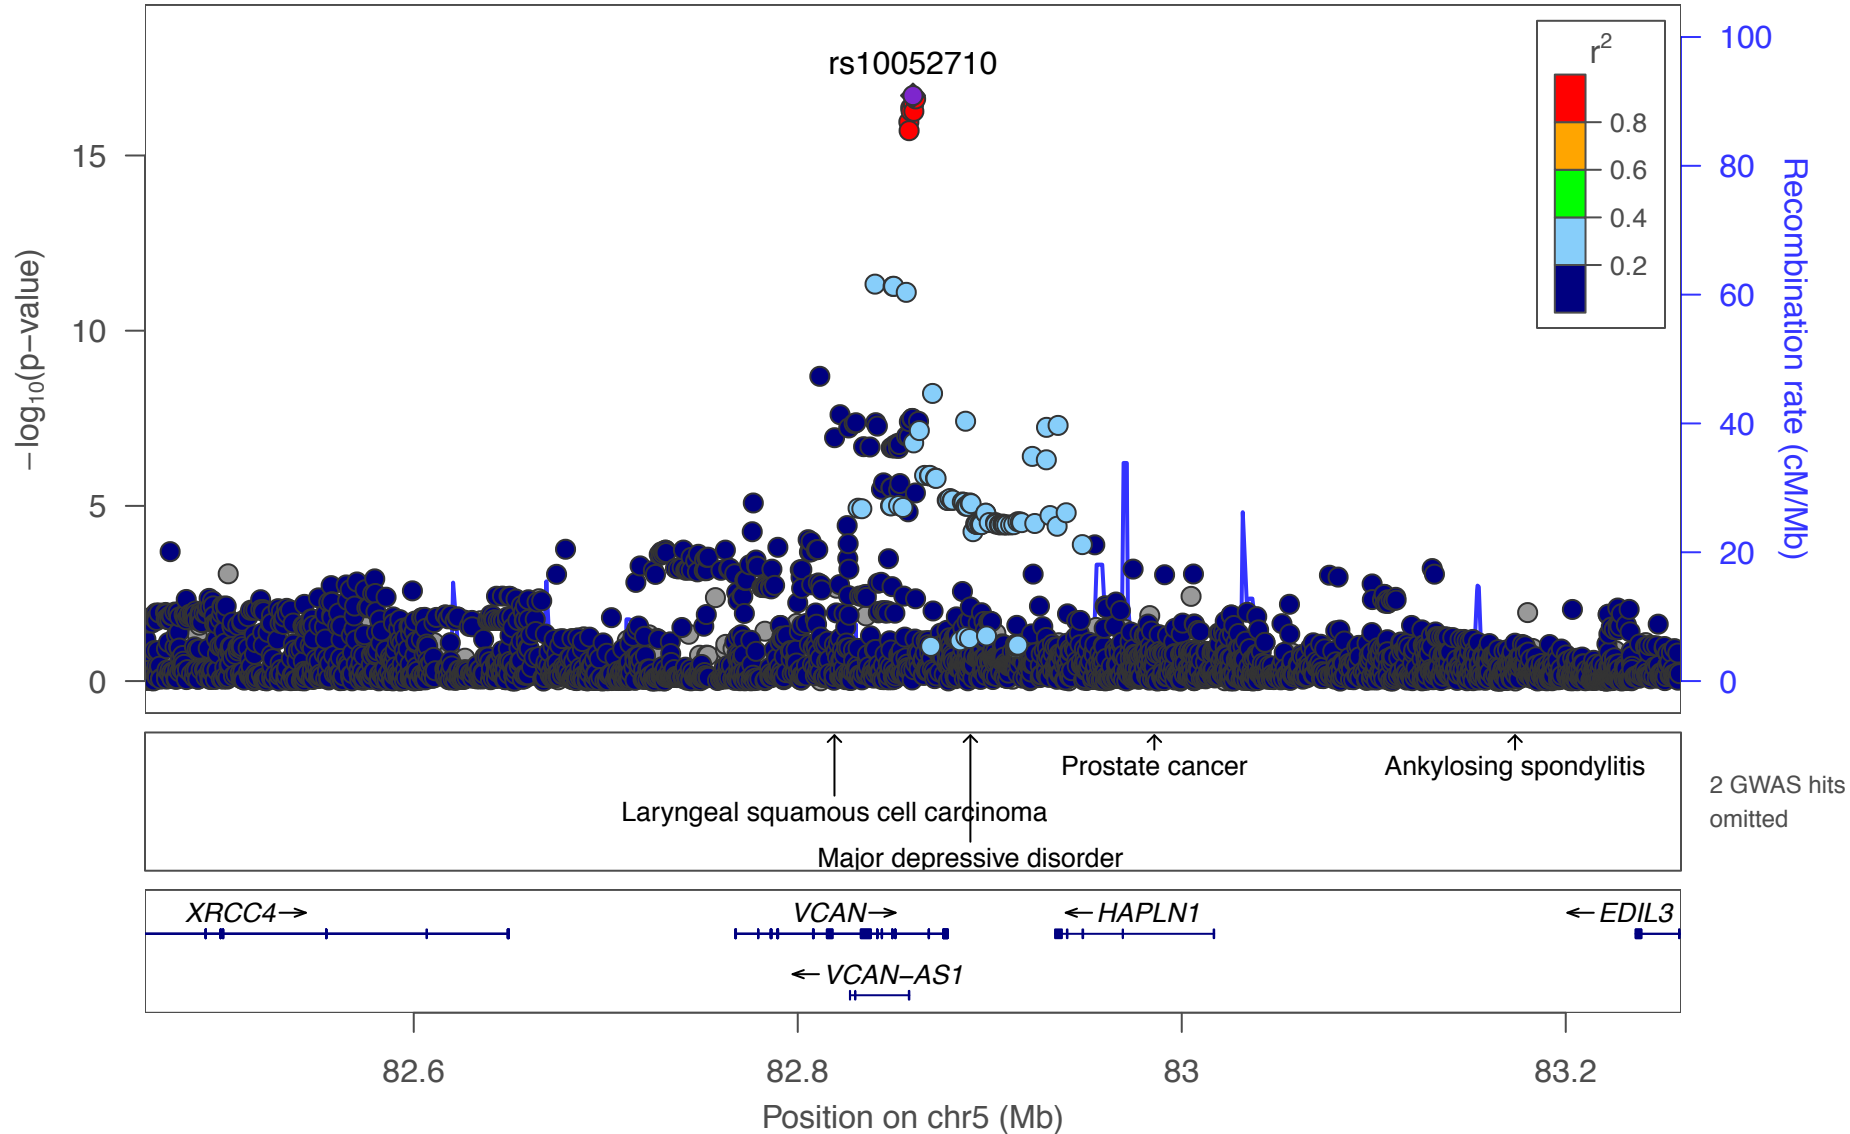

date: Thu Aug 17 18:07:35 2017

build: hg19

display range: chr5:82460025–83260025 [82460025–83260025]

hilite range: 0 – 0 [ 0 – 0 ]

reference SNP: chr5:82860025

number of SNPs plotted: 3392

min P.value: 1.95E–17 [chr5:82860025]

max P.value: 9.99E–1 [chr5:82999322]

omitted GWAS Hits: NA, NA

## GWAS Catalog SNPs in Region

| <b>chr</b> | <b>pos (Mb)</b> | <b>trait</b>                      | <b>snp</b> |
|------------|-----------------|-----------------------------------|------------|
| 5          | 82.81912        | Laryngeal squamous cell carcinoma | rs310518   |
| 5          | 82.84549        | Diisocyanate-induced asthma       | rs3852186  |
| 5          | 82.88991        | Major depressive disorder         | rs310501   |
| 5          | 82.96073        | Visceral fat                      | rs3846635  |
| 5          | 82.98574        | Prostate cancer                   | rs4466137  |
| 5          | 83.17359        | Ankylosing spondylitis            | rs4552569  |

# TBSS\_L2\_Splenium\_of\_corpus\_callosum

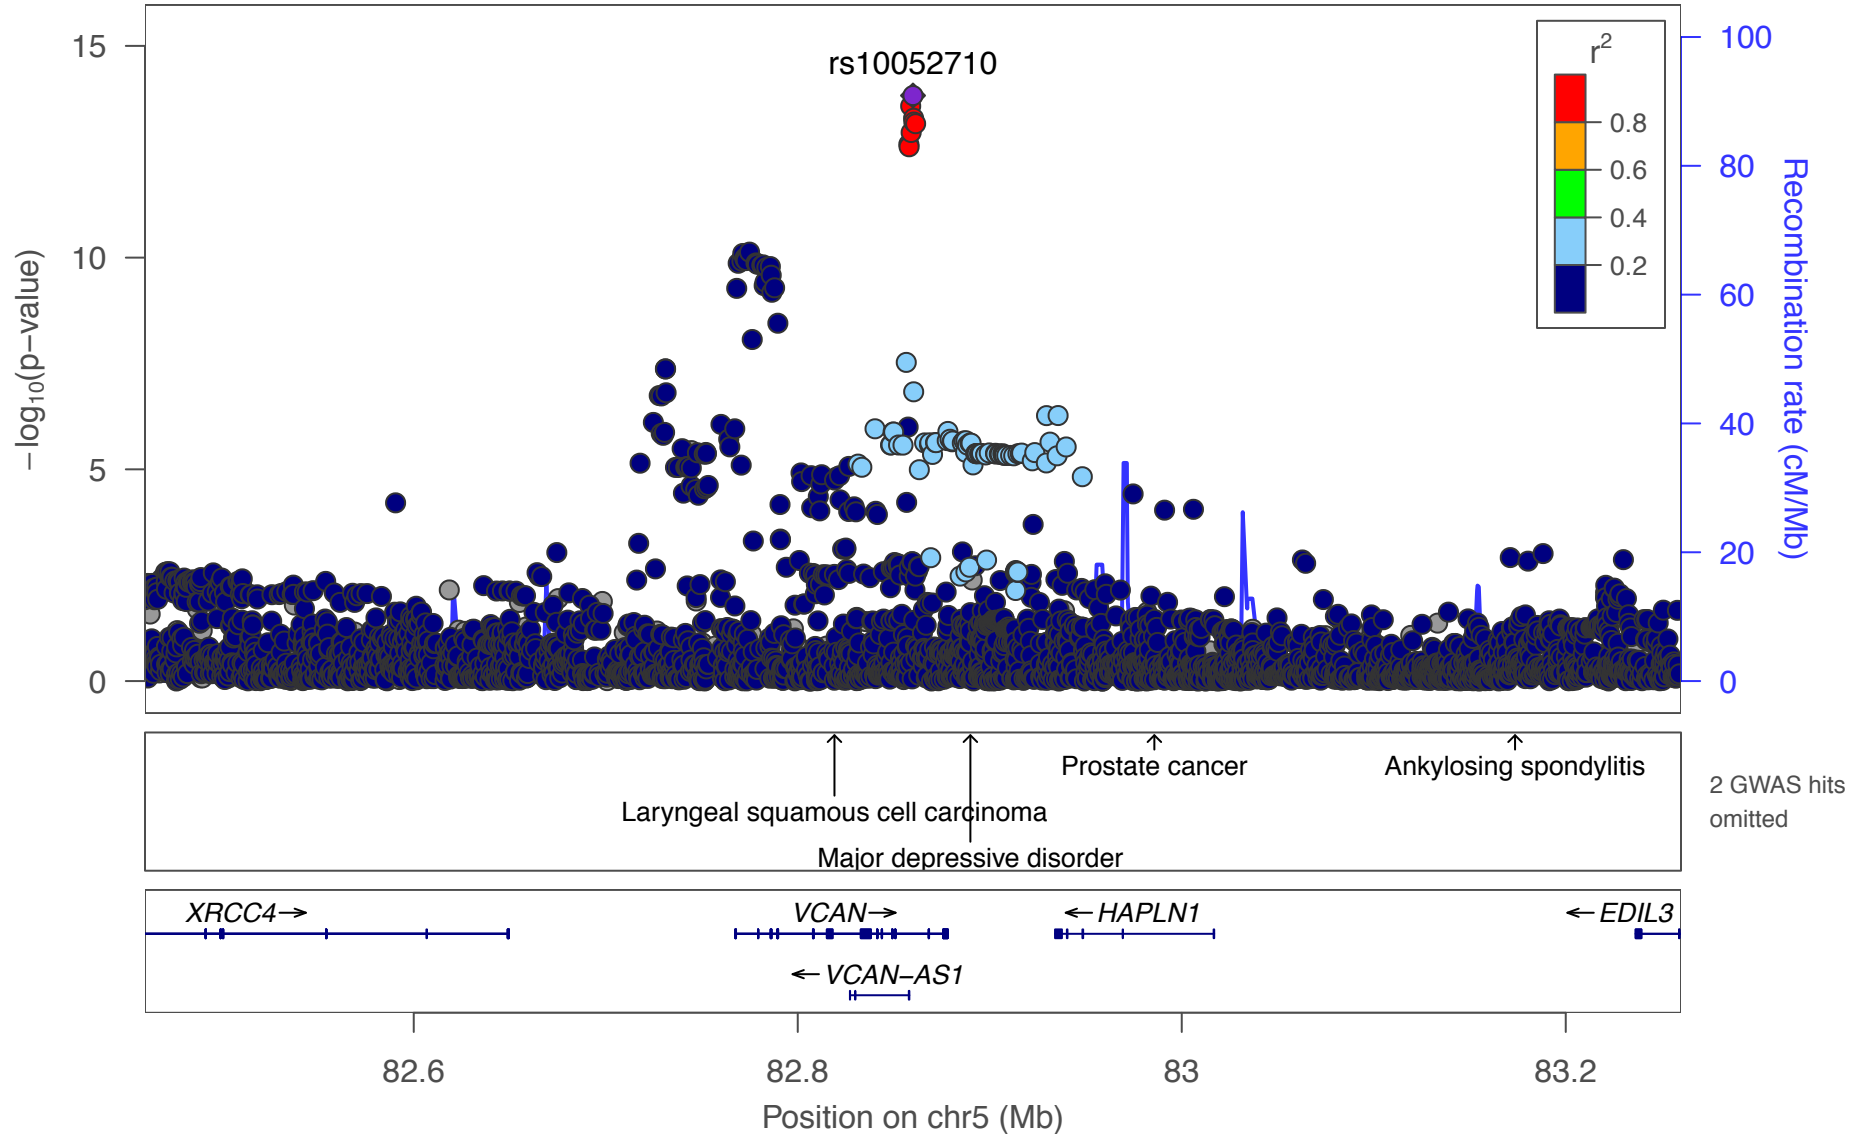



date: Thu Aug 17 18:07:35 2017

build: hg19

display range: chr5:82460025–83260025 [82460025–83260025]

hilite range: 0 – 0 [ 0 – 0 ]

reference SNP: chr5:82860025

number of SNPs plotted: 3392

min P.value: 1.49E–14 [chr5:82860025]

max P.value: 10E–1 [chr5:83008479]

omitted GWAS Hits: NA, NA

## GWAS Catalog SNPs in Region

| <b>chr</b> | <b>pos (Mb)</b> | <b>trait</b>                      | <b>snp</b> |
|------------|-----------------|-----------------------------------|------------|
| 5          | 82.81912        | Laryngeal squamous cell carcinoma | rs310518   |
| 5          | 82.84549        | Diisocyanate-induced asthma       | rs3852186  |
| 5          | 82.88991        | Major depressive disorder         | rs310501   |
| 5          | 82.96073        | Visceral fat                      | rs3846635  |
| 5          | 82.98574        | Prostate cancer                   | rs4466137  |
| 5          | 83.17359        | Ankylosing spondylitis            | rs4552569  |

# TBSS\_L2\_Retrolenticular\_part\_of\_internal\_capsule\_L

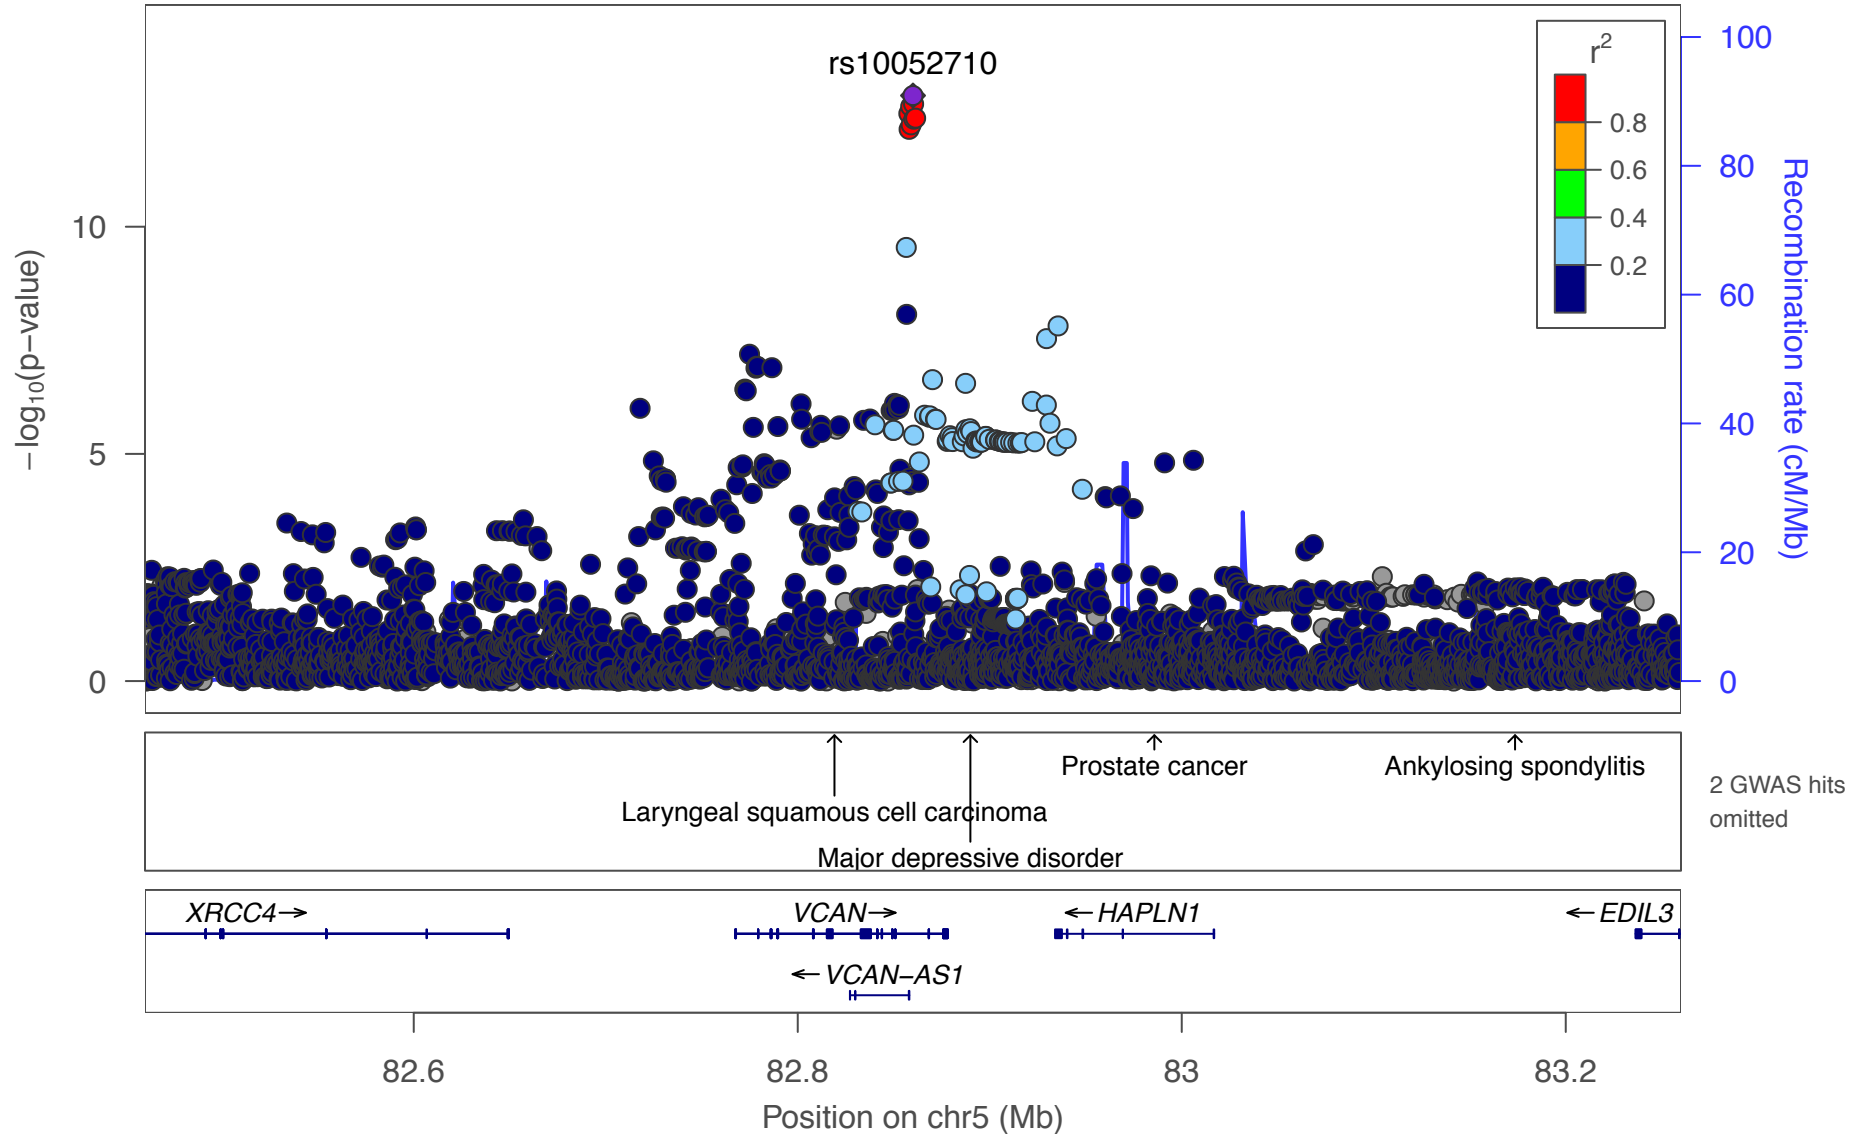

date: Thu Aug 17 17:52:01 2017

build: hg19

display range: chr5:82460025–83260025 [82460025–83260025]

hilite range: 0 – 0 [ 0 – 0 ]

reference SNP: chr5:82860025

number of SNPs plotted: 3392

min P.value: 1.3E–13 [chr5:82860025]

max P.value: 10E–1 [chr5:82460502]

omitted GWAS Hits: NA, NA

## GWAS Catalog SNPs in Region

| <b>chr</b> | <b>pos (Mb)</b> | <b>trait</b>                      | <b>snp</b> |
|------------|-----------------|-----------------------------------|------------|
| 5          | 82.81912        | Laryngeal squamous cell carcinoma | rs310518   |
| 5          | 82.84549        | Diisocyanate-induced asthma       | rs3852186  |
| 5          | 82.88991        | Major depressive disorder         | rs310501   |
| 5          | 82.96073        | Visceral fat                      | rs3846635  |
| 5          | 82.98574        | Prostate cancer                   | rs4466137  |
| 5          | 83.17359        | Ankylosing spondylitis            | rs4552569  |

# TBSS\_L2\_Posterior\_corona\_radiata\_R

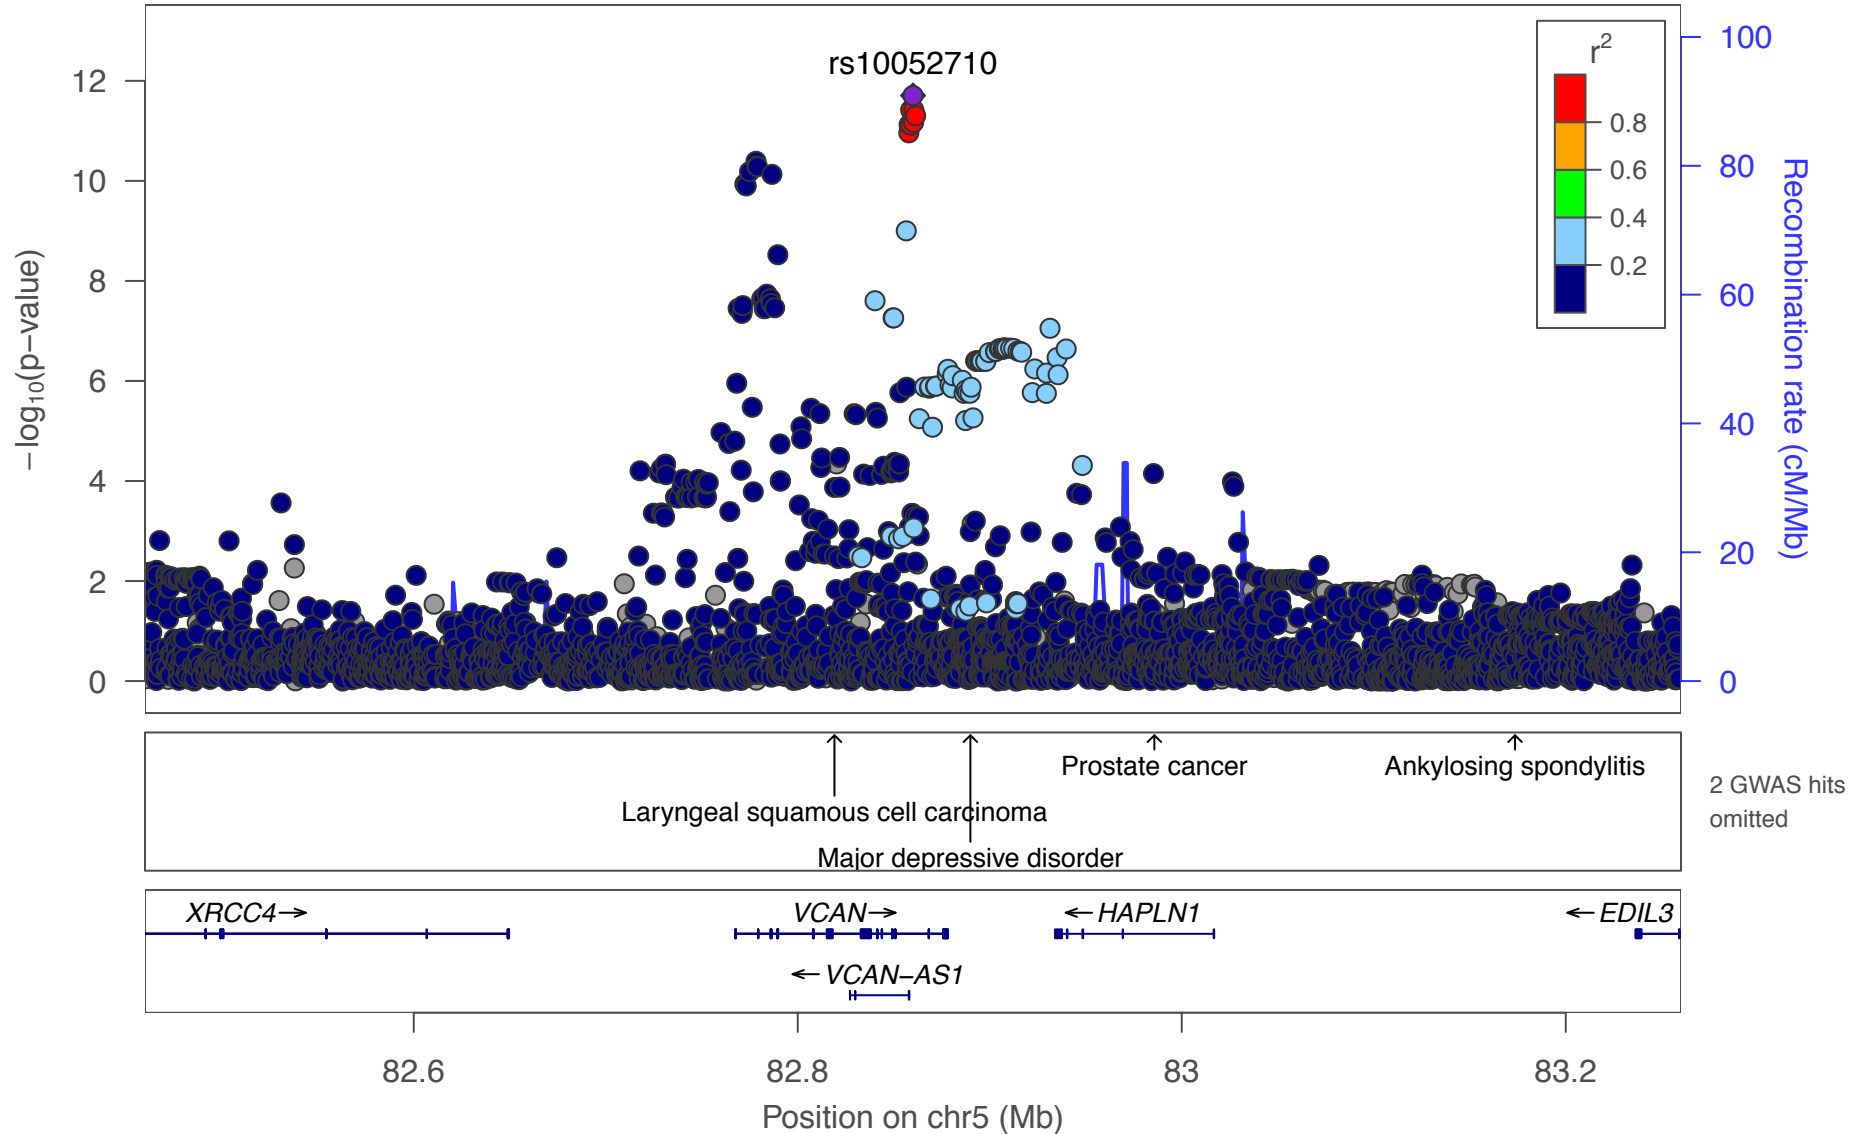

date: Thu Aug 17 17:52:01 2017

build: hg19

display range: chr5:82460025–83260025 [82460025–83260025]

hilite range: 0 – 0 [ 0 – 0 ]

reference SNP: chr5:82860025

number of SNPs plotted: 3392

min P.value: 1.97E–12 [chr5:82860025]

max P.value: 10E–1 [chr5:82913727]

omitted GWAS Hits: NA, NA

## GWAS Catalog SNPs in Region

| <b>chr</b> | <b>pos (Mb)</b> | <b>trait</b>                      | <b>snp</b> |
|------------|-----------------|-----------------------------------|------------|
| 5          | 82.81912        | Laryngeal squamous cell carcinoma | rs310518   |
| 5          | 82.84549        | Diisocyanate-induced asthma       | rs3852186  |
| 5          | 82.88991        | Major depressive disorder         | rs310501   |
| 5          | 82.96073        | Visceral fat                      | rs3846635  |
| 5          | 82.98574        | Prostate cancer                   | rs4466137  |
| 5          | 83.17359        | Ankylosing spondylitis            | rs4552569  |



# TBSS\_L2\_Posterior\_corona\_radiata\_L

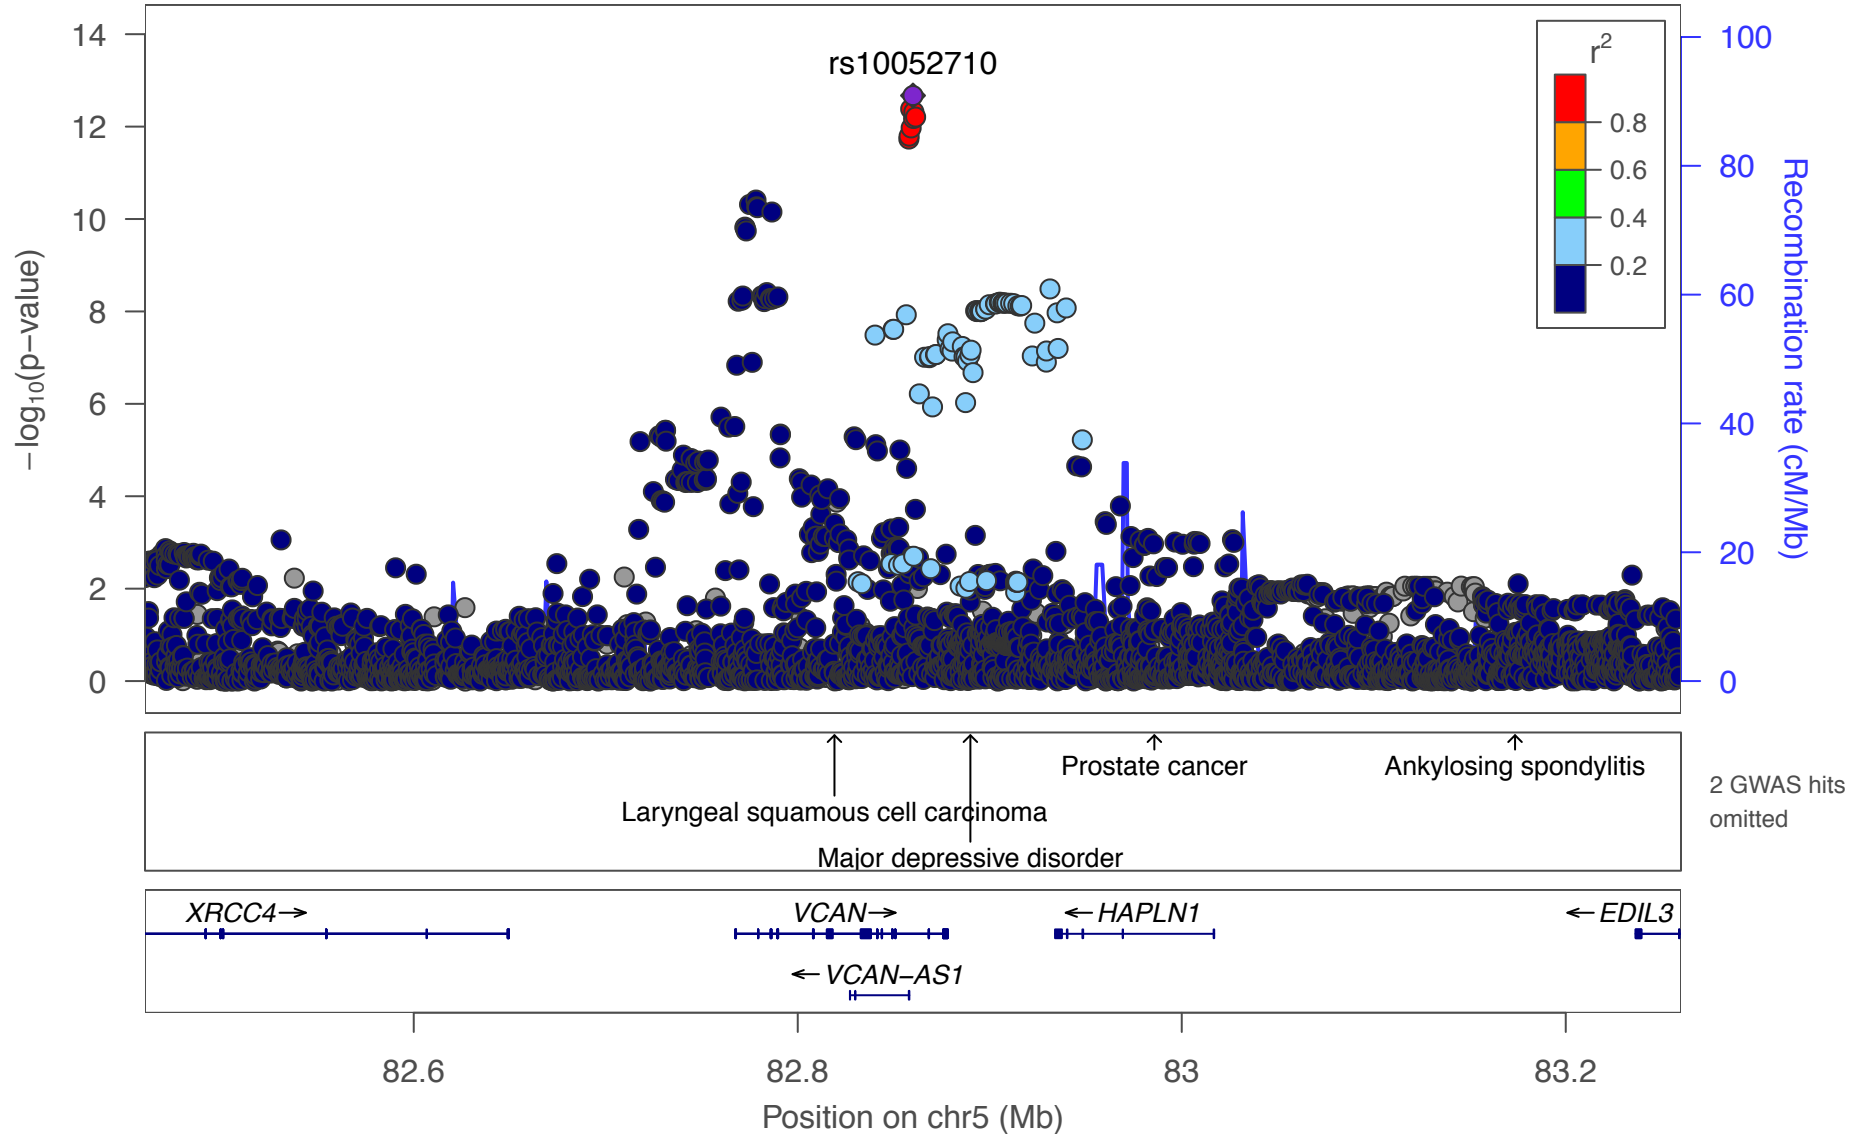

date: Thu Aug 17 17:52:01 2017

build: hg19

display range: chr5:82460025–83260025 [82460025–83260025]

hilite range: 0 – 0 [ 0 – 0 ]

reference SNP: chr5:82860025

number of SNPs plotted: 3392

min P.value: 2.13E–13 [chr5:82860025]

max P.value: 10E–1 [chr5:82723169]

omitted GWAS Hits: NA, NA

## GWAS Catalog SNPs in Region

| <b>chr</b> | <b>pos (Mb)</b> | <b>trait</b>                      | <b>snp</b> |
|------------|-----------------|-----------------------------------|------------|
| 5          | 82.81912        | Laryngeal squamous cell carcinoma | rs310518   |
| 5          | 82.84549        | Diisocyanate-induced asthma       | rs3852186  |
| 5          | 82.88991        | Major depressive disorder         | rs310501   |
| 5          | 82.96073        | Visceral fat                      | rs3846635  |
| 5          | 82.98574        | Prostate cancer                   | rs4466137  |
| 5          | 83.17359        | Ankylosing spondylitis            | rs4552569  |

# TBSS\_L2\_Posterior\_thalamic\_radiation\_R

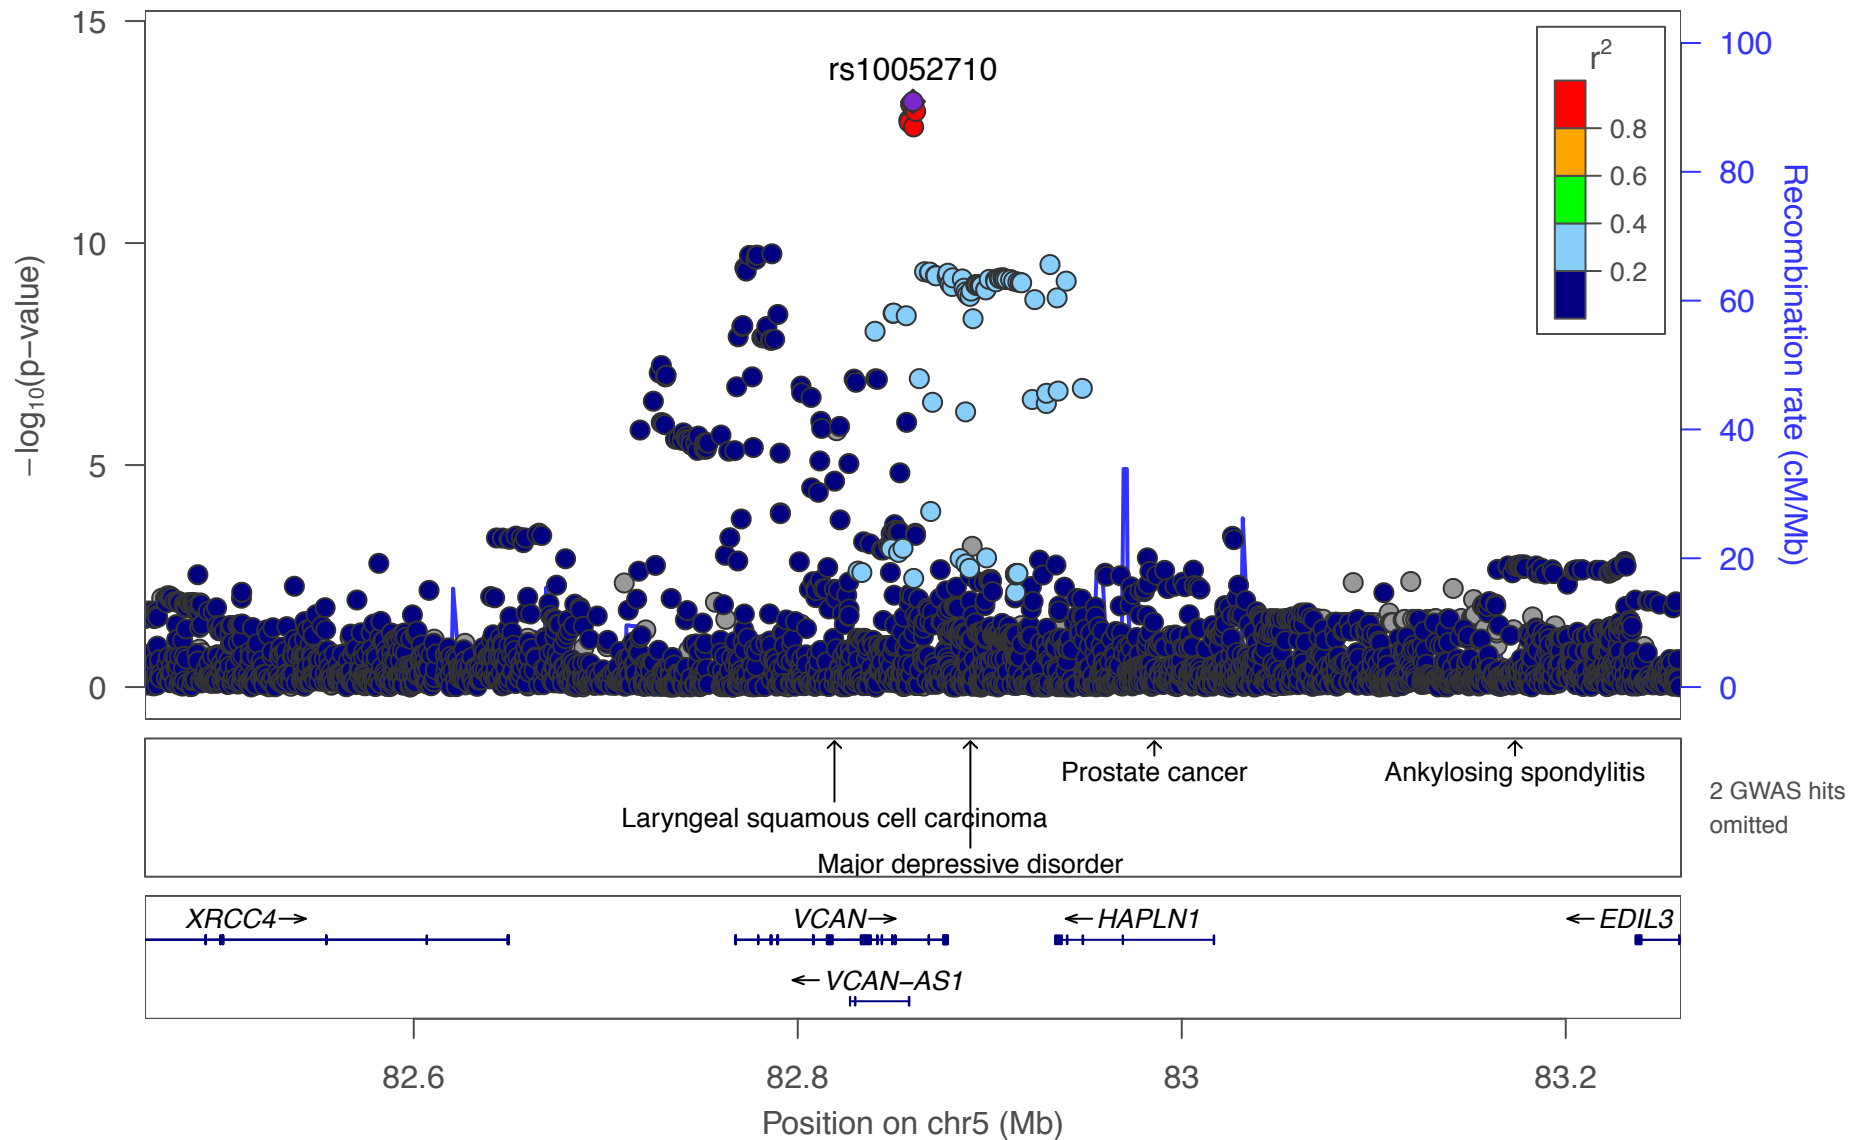

date: Thu Aug 17 17:52:01 2017

build: hg19

display range: chr5:82460025–83260025 [82460025–83260025]

hilite range: 0 – 0 [ 0 – 0 ]

reference SNP: chr5:82860025

number of SNPs plotted: 3392

min P.value: 6.5E–14 [chr5:82860025]

max P.value: 10E–1 [chr5:82942774]

omitted GWAS Hits: NA, NA

## GWAS Catalog SNPs in Region

| <b>chr</b> | <b>pos (Mb)</b> | <b>trait</b>                      | <b>snp</b> |
|------------|-----------------|-----------------------------------|------------|
| 5          | 82.81912        | Laryngeal squamous cell carcinoma | rs310518   |
| 5          | 82.84549        | Diisocyanate-induced asthma       | rs3852186  |
| 5          | 82.88991        | Major depressive disorder         | rs310501   |
| 5          | 82.96073        | Visceral fat                      | rs3846635  |
| 5          | 82.98574        | Prostate cancer                   | rs4466137  |
| 5          | 83.17359        | Ankylosing spondylitis            | rs4552569  |

# TBSS\_L2\_Posterior\_thalamic\_radiation\_L

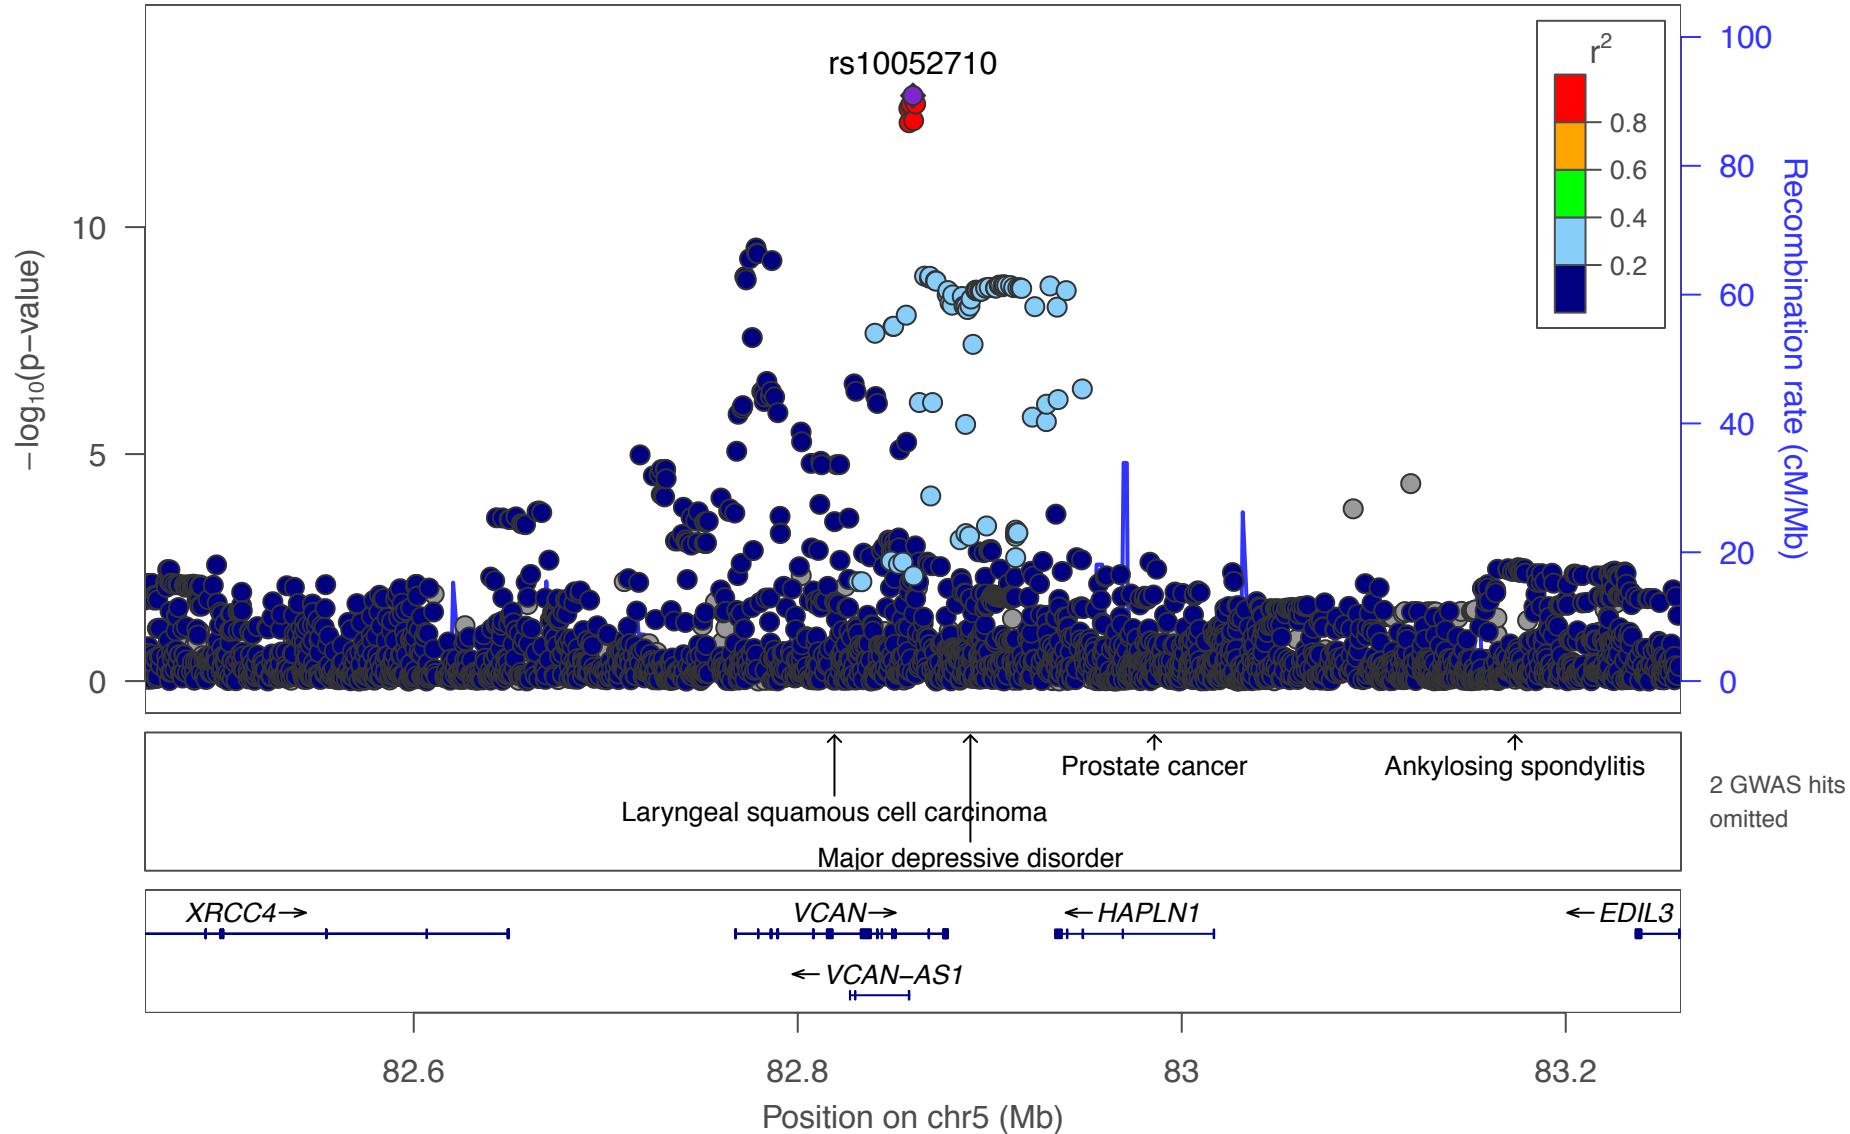

date: Thu Aug 17 17:52:01 2017

build: hg19

display range: chr5:82460025–83260025 [82460025–83260025]

hilite range: 0 – 0 [ 0 – 0 ]

reference SNP: chr5:82860025

number of SNPs plotted: 3392

min P.value: 1.26E–13 [chr5:82860025]

max P.value: 9.99E–1 [chr5:82741980]

omitted GWAS Hits: NA, NA



## GWAS Catalog SNPs in Region

| <b>chr</b> | <b>pos (Mb)</b> | <b>trait</b>                      | <b>snp</b> |
|------------|-----------------|-----------------------------------|------------|
| 5          | 82.81912        | Laryngeal squamous cell carcinoma | rs310518   |
| 5          | 82.84549        | Diisocyanate-induced asthma       | rs3852186  |
| 5          | 82.88991        | Major depressive disorder         | rs310501   |
| 5          | 82.96073        | Visceral fat                      | rs3846635  |
| 5          | 82.98574        | Prostate cancer                   | rs4466137  |
| 5          | 83.17359        | Ankylosing spondylitis            | rs4552569  |

# TBSS\_L2\_Sagittal\_stratum\_R

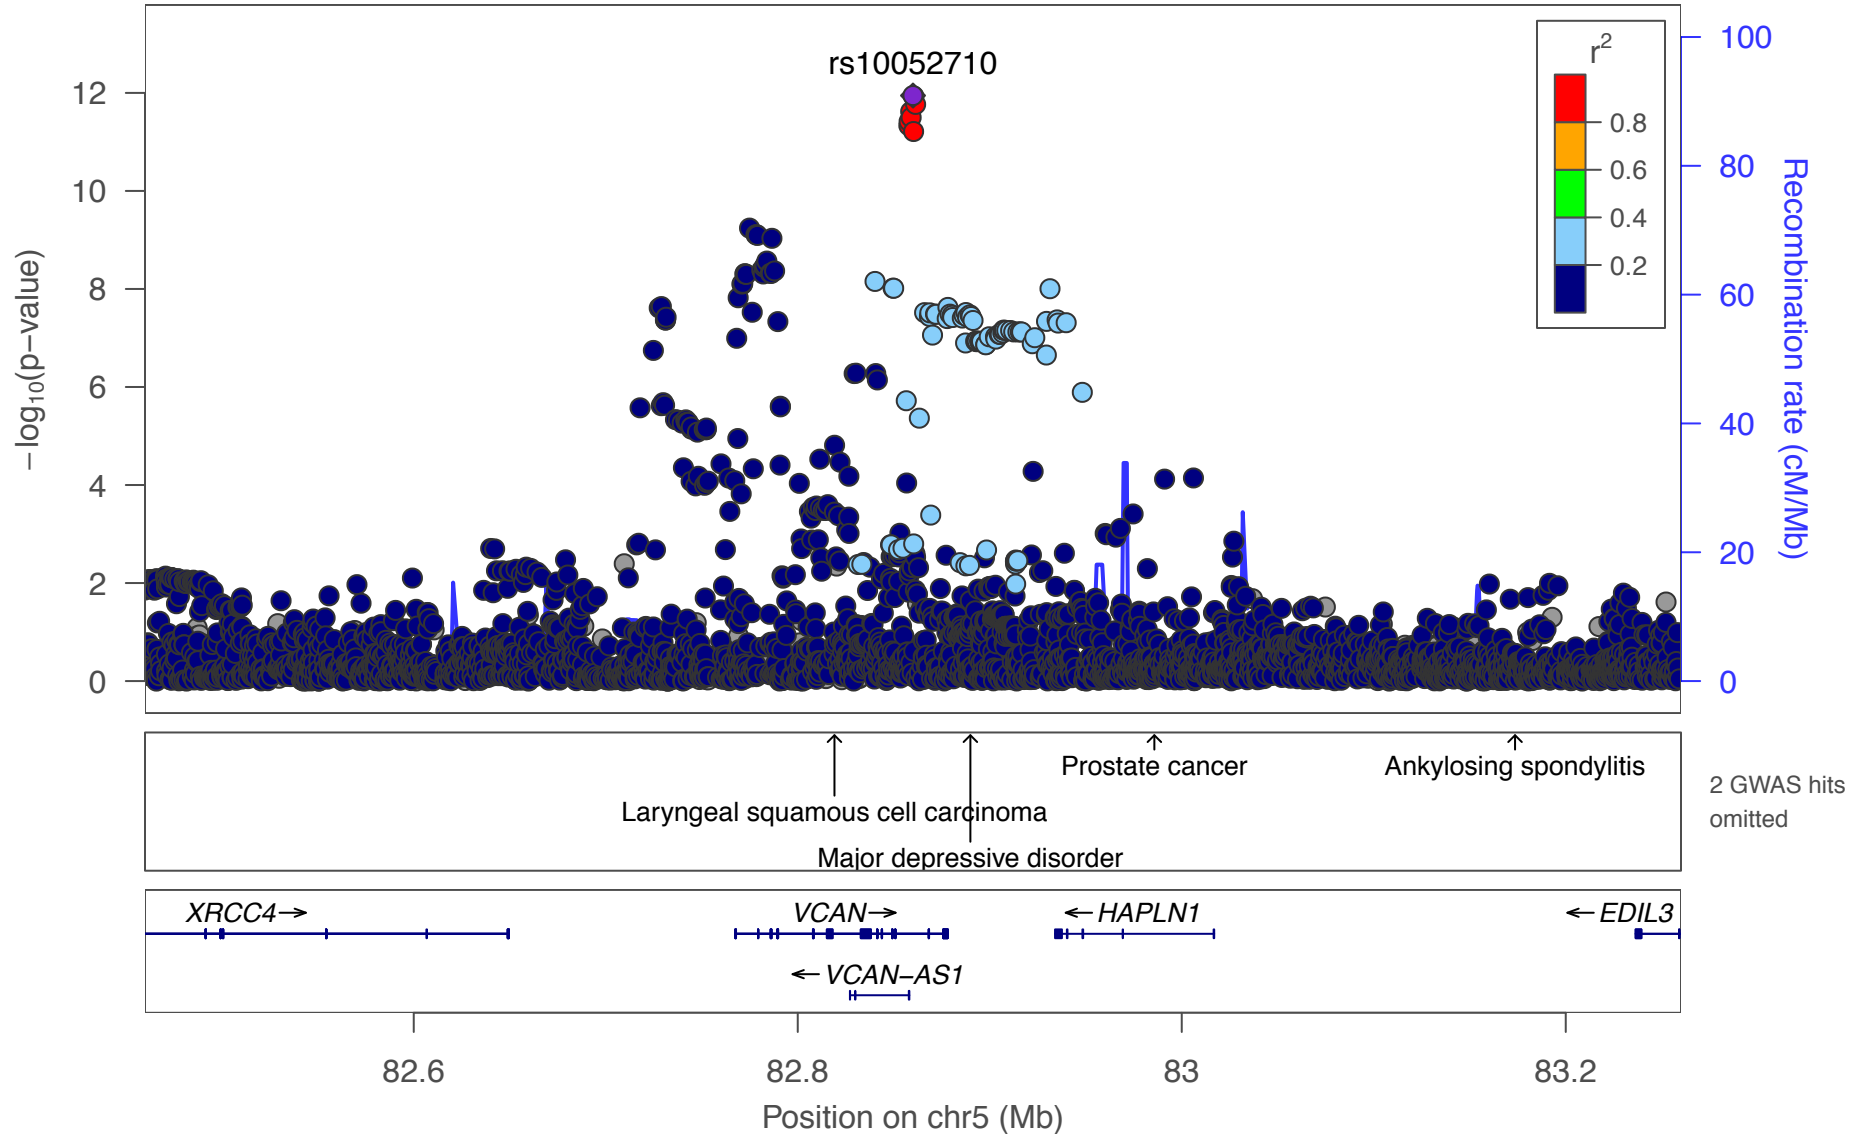

date: Thu Aug 17 17:52:01 2017

build: hg19

display range: chr5:82460025–83260025 [82460025–83260025]

hilite range: 0 – 0 [ 0 – 0 ]

reference SNP: chr5:82860025

number of SNPs plotted: 3392

min P.value: 1.13E–12 [chr5:82860025]

max P.value: 9.99E–1 [chr5:82802571]

omitted GWAS Hits: NA, NA

## GWAS Catalog SNPs in Region

| <b>chr</b> | <b>pos (Mb)</b> | <b>trait</b>                      | <b>snp</b> |
|------------|-----------------|-----------------------------------|------------|
| 5          | 82.81912        | Laryngeal squamous cell carcinoma | rs310518   |
| 5          | 82.84549        | Diisocyanate-induced asthma       | rs3852186  |
| 5          | 82.88991        | Major depressive disorder         | rs310501   |
| 5          | 82.96073        | Visceral fat                      | rs3846635  |
| 5          | 82.98574        | Prostate cancer                   | rs4466137  |
| 5          | 83.17359        | Ankylosing spondylitis            | rs4552569  |

# TBSS\_L3\_Splenium\_of\_corpus\_callosum

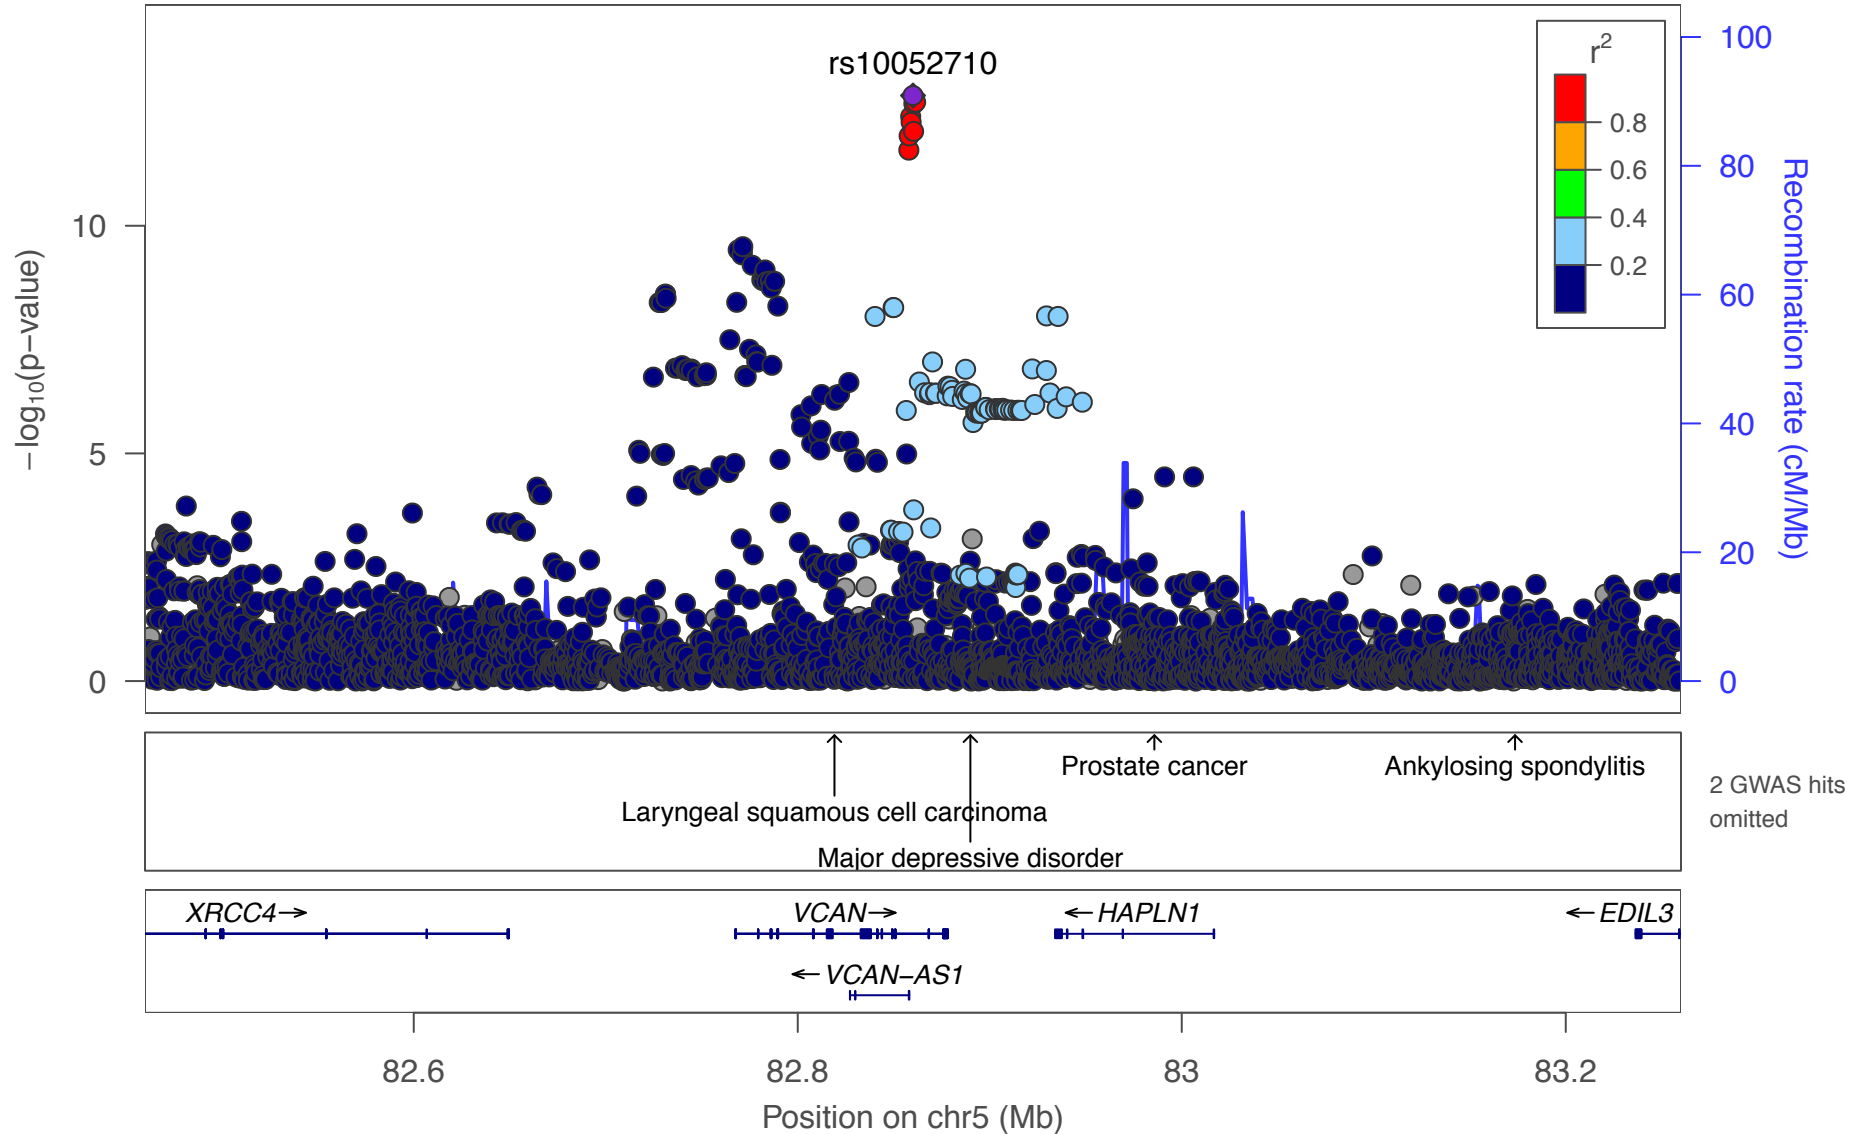

date: Thu Aug 17 17:52:01 2017

build: hg19

display range: chr5:82460025–83260025 [82460025–83260025]

hilite range: 0 – 0 [ 0 – 0 ]

reference SNP: chr5:82860025

number of SNPs plotted: 3392

min P.value: 1.38E–13 [chr5:82860025]

max P.value: 10E–1 [chr5:83007358]

omitted GWAS Hits: NA, NA

## GWAS Catalog SNPs in Region

| <b>chr</b> | <b>pos (Mb)</b> | <b>trait</b>                      | <b>snp</b> |
|------------|-----------------|-----------------------------------|------------|
| 5          | 82.81912        | Laryngeal squamous cell carcinoma | rs310518   |
| 5          | 82.84549        | Diisocyanate-induced asthma       | rs3852186  |
| 5          | 82.88991        | Major depressive disorder         | rs310501   |
| 5          | 82.96073        | Visceral fat                      | rs3846635  |
| 5          | 82.98574        | Prostate cancer                   | rs4466137  |
| 5          | 83.17359        | Ankylosing spondylitis            | rs4552569  |

# TBSS\_L3\_Retrolenticular\_part\_of\_internal\_capsule\_R

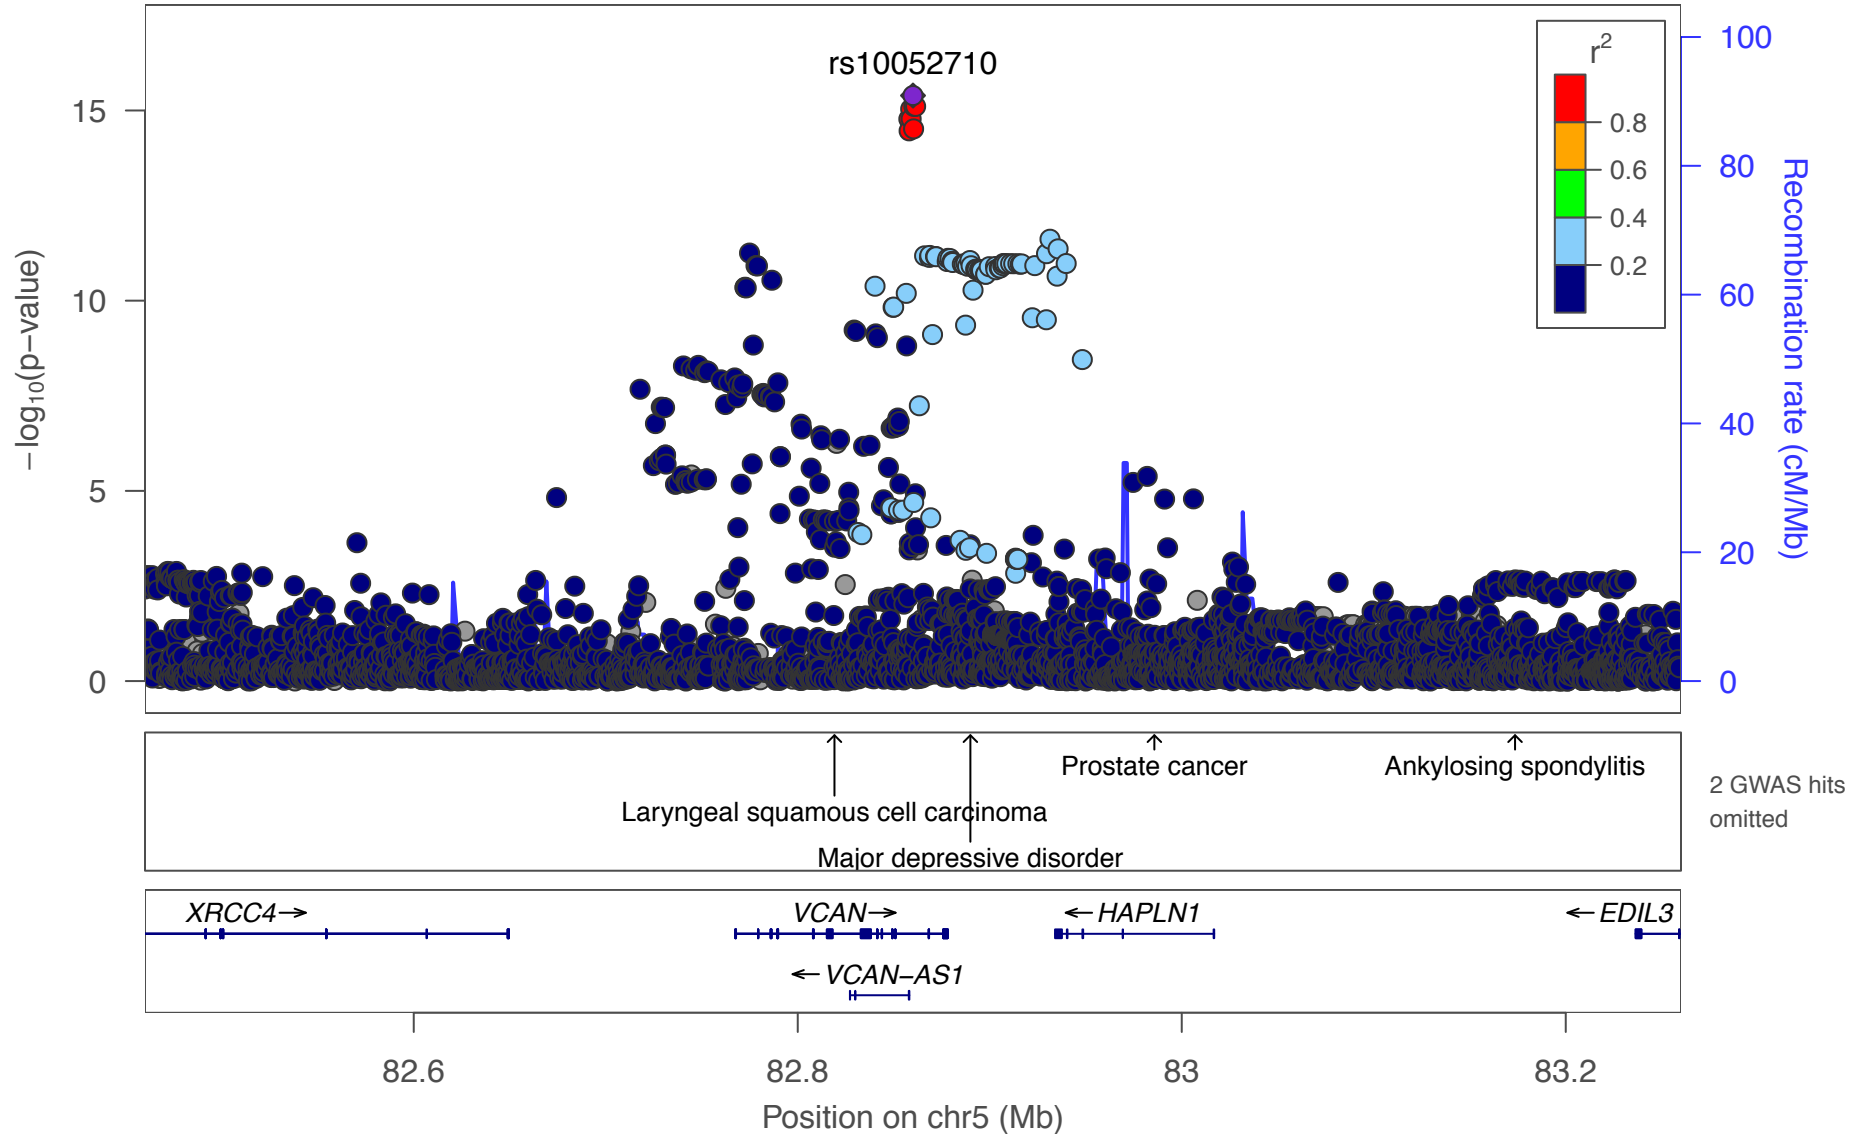



date: Thu Aug 17 17:52:01 2017

build: hg19

display range: chr5:82460025–83260025 [82460025–83260025]

hilite range: 0 – 0 [ 0 – 0 ]

reference SNP: chr5:82860025

number of SNPs plotted: 3392

min P.value: 4.06E–16 [chr5:82860025]

max P.value: 9.99E–1 [chr5:82762095]

omitted GWAS Hits: NA, NA

## GWAS Catalog SNPs in Region

| <b>chr</b> | <b>pos (Mb)</b> | <b>trait</b>                      | <b>snp</b> |
|------------|-----------------|-----------------------------------|------------|
| 5          | 82.81912        | Laryngeal squamous cell carcinoma | rs310518   |
| 5          | 82.84549        | Diisocyanate-induced asthma       | rs3852186  |
| 5          | 82.88991        | Major depressive disorder         | rs310501   |
| 5          | 82.96073        | Visceral fat                      | rs3846635  |
| 5          | 82.98574        | Prostate cancer                   | rs4466137  |
| 5          | 83.17359        | Ankylosing spondylitis            | rs4552569  |

# TBSS\_L3\_Retrolenticular\_part\_of\_internal\_capsule\_L

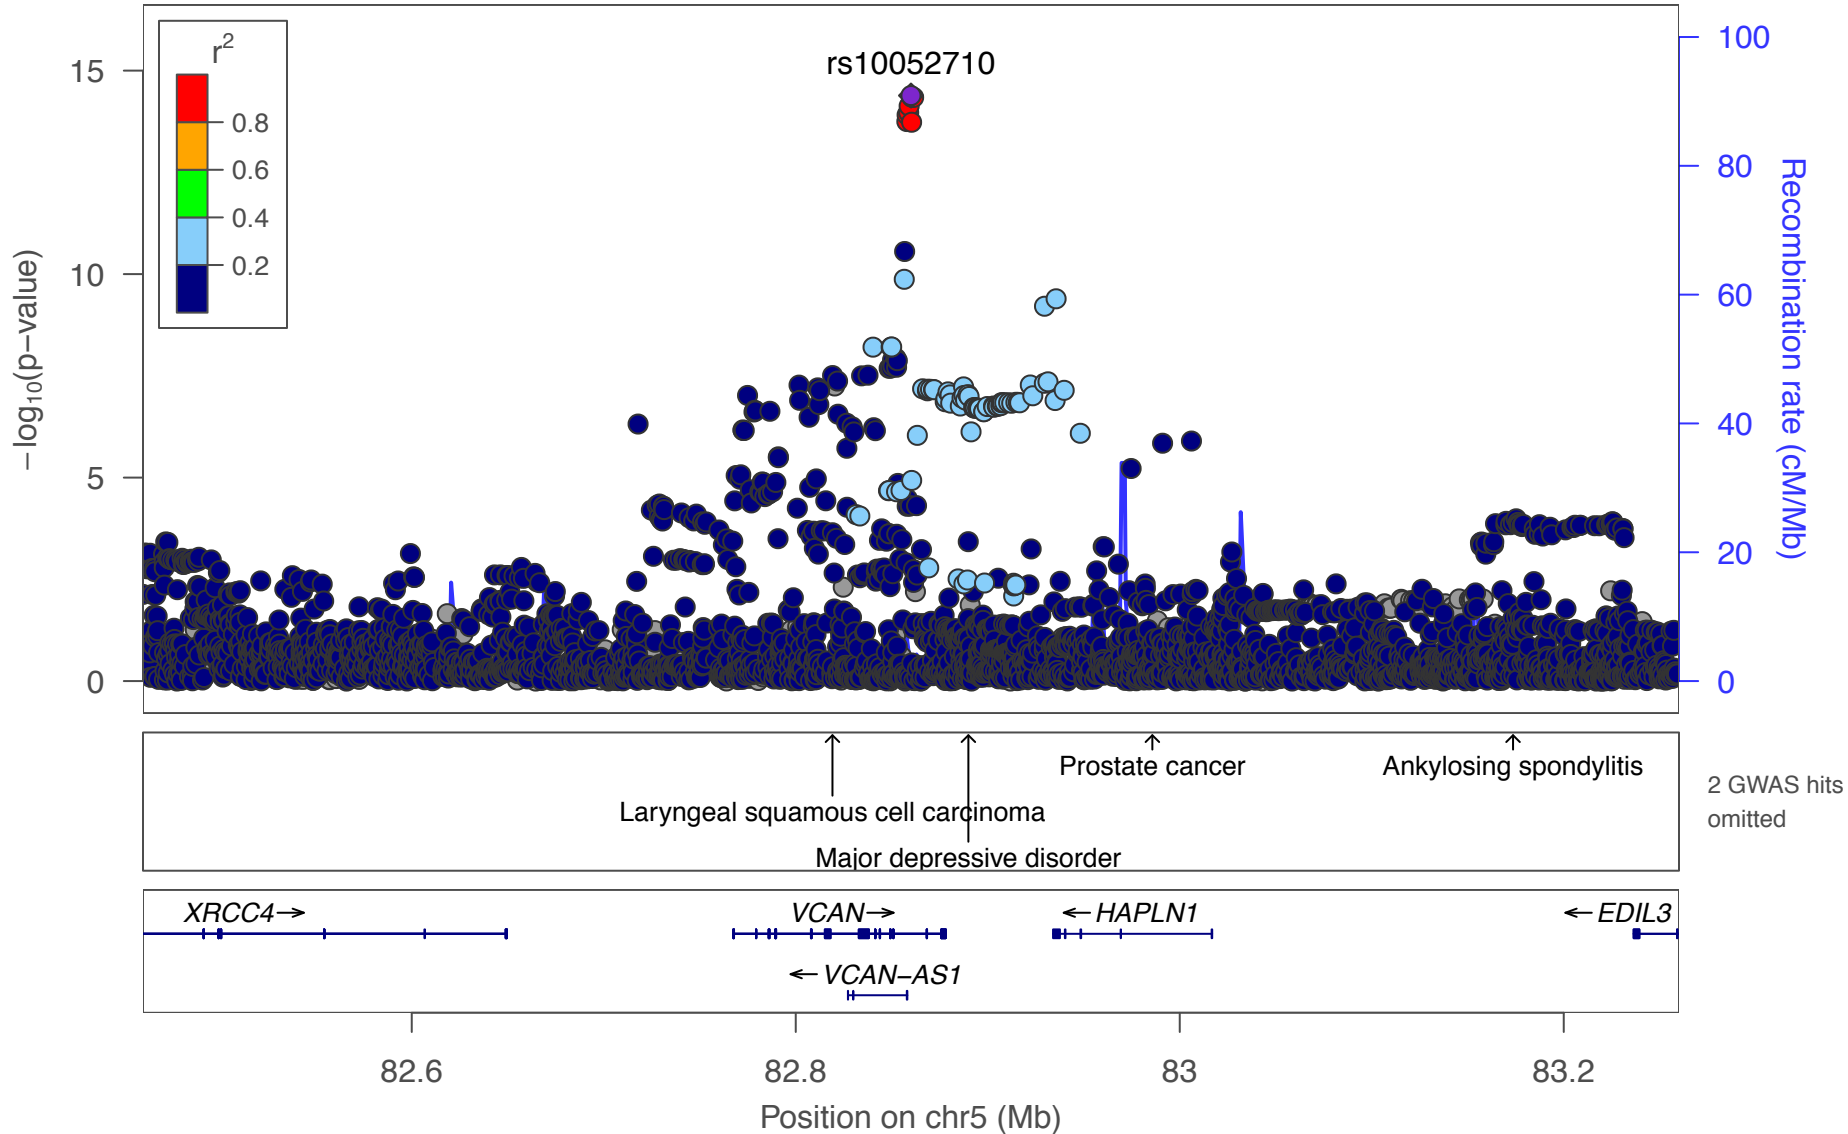

date: Thu Aug 17 17:52:01 2017

build: hg19

display range: chr5:82460025–83260025 [82460025–83260025]

hilite range: 0 – 0 [ 0 – 0 ]

reference SNP: chr5:82860025

number of SNPs plotted: 3392

min P.value: 4.1E–15 [chr5:82860025]

max P.value: 10E–1 [chr5:82566020]

omitted GWAS Hits: NA, NA

## GWAS Catalog SNPs in Region

| <b>chr</b> | <b>pos (Mb)</b> | <b>trait</b>                      | <b>snp</b> |
|------------|-----------------|-----------------------------------|------------|
| 5          | 82.81912        | Laryngeal squamous cell carcinoma | rs310518   |
| 5          | 82.84549        | Diisocyanate-induced asthma       | rs3852186  |
| 5          | 82.88991        | Major depressive disorder         | rs310501   |
| 5          | 82.96073        | Visceral fat                      | rs3846635  |
| 5          | 82.98574        | Prostate cancer                   | rs4466137  |
| 5          | 83.17359        | Ankylosing spondylitis            | rs4552569  |

# TBSS\_L3\_Posterior\_corona\_radiata\_L

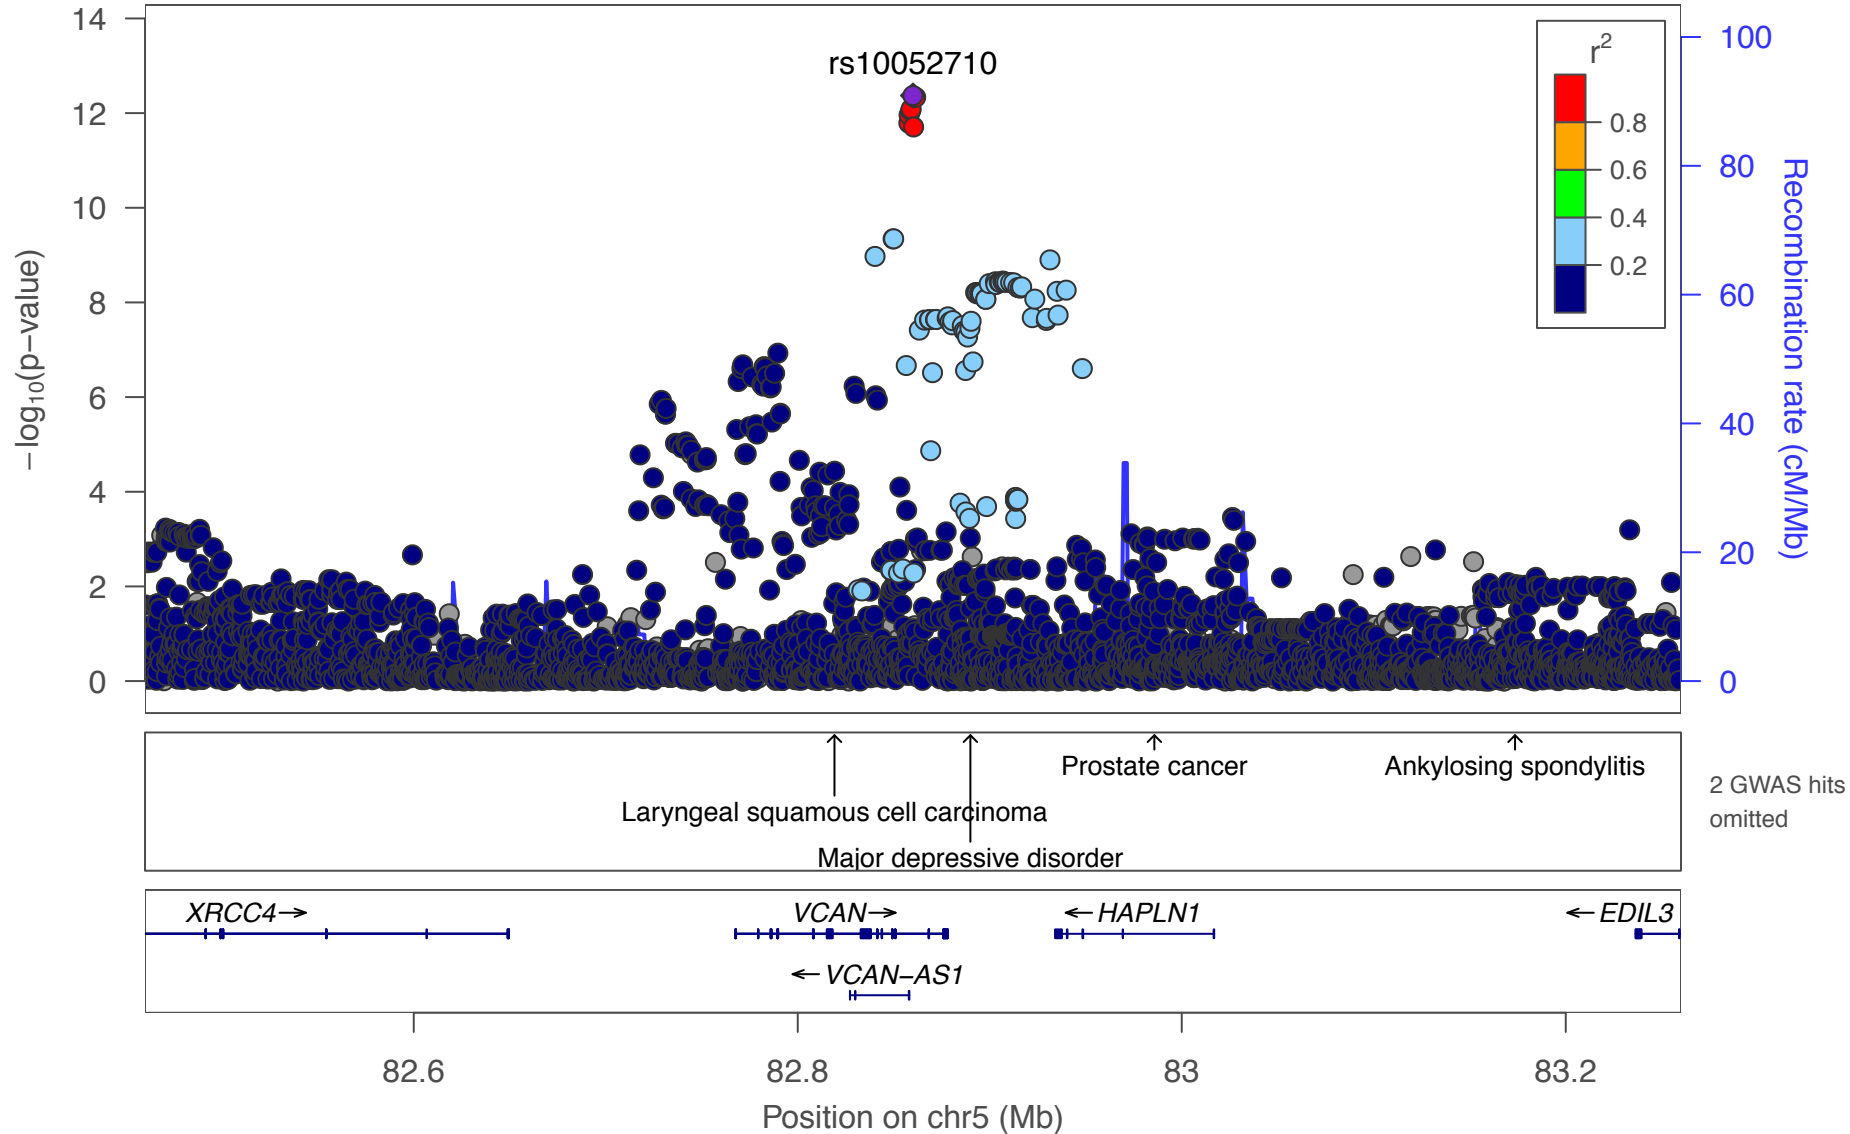

date: Thu Aug 17 17:52:01 2017

build: hg19

display range: chr5:82460025–83260025 [82460025–83260025]

hilite range: 0 – 0 [ 0 – 0 ]

reference SNP: chr5:82860025

number of SNPs plotted: 3392

min P.value: 4.26E–13 [chr5:82860025]

max P.value: 10E–1 [chr5:83078656]

omitted GWAS Hits: NA, NA

## GWAS Catalog SNPs in Region

| <b>chr</b> | <b>pos (Mb)</b> | <b>trait</b>                      | <b>snp</b> |
|------------|-----------------|-----------------------------------|------------|
| 5          | 82.81912        | Laryngeal squamous cell carcinoma | rs310518   |
| 5          | 82.84549        | Diisocyanate-induced asthma       | rs3852186  |
| 5          | 82.88991        | Major depressive disorder         | rs310501   |
| 5          | 82.96073        | Visceral fat                      | rs3846635  |
| 5          | 82.98574        | Prostate cancer                   | rs4466137  |
| 5          | 83.17359        | Ankylosing spondylitis            | rs4552569  |



# TBSS\_L3\_Posterior\_thalamic\_radiation\_R

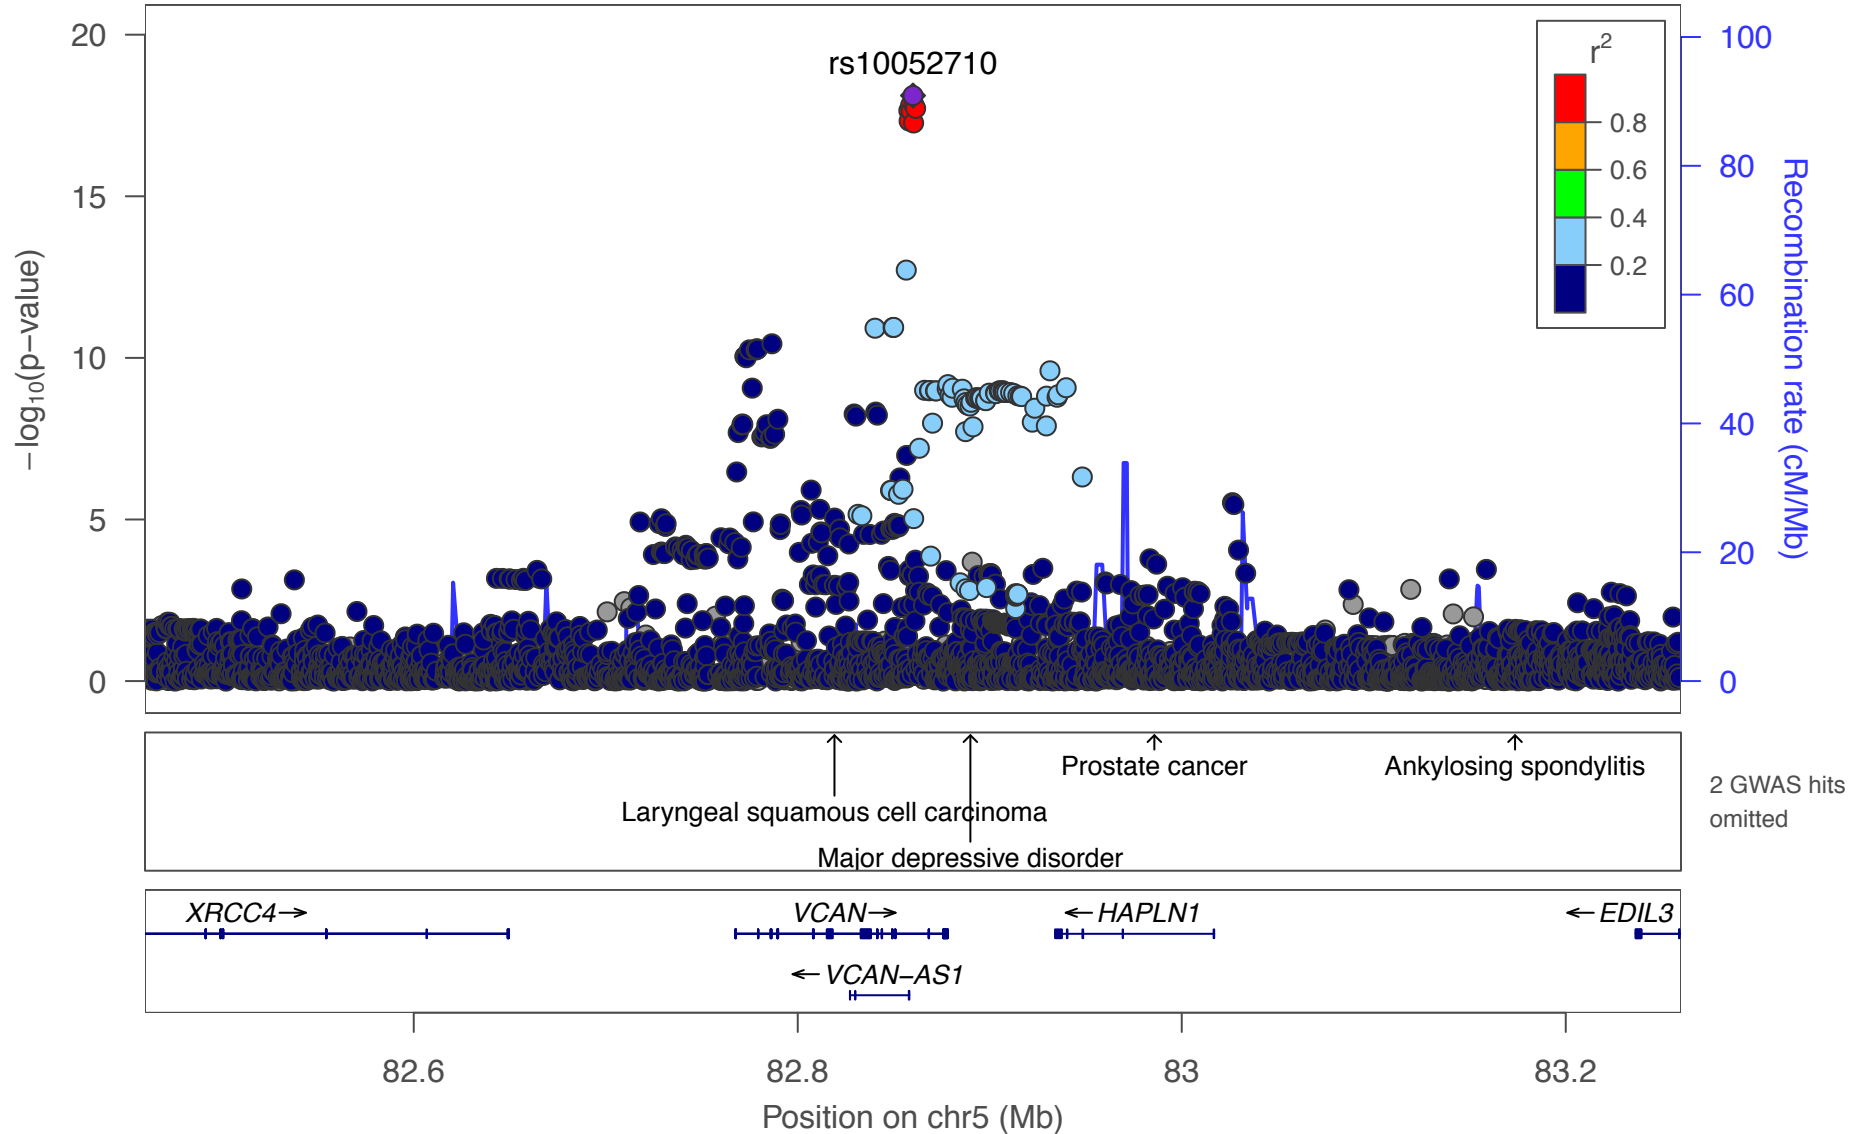

date: Thu Aug 17 17:52:01 2017

build: hg19

display range: chr5:82460025–83260025 [82460025–83260025]

hilite range: 0 – 0 [ 0 – 0 ]

reference SNP: chr5:82860025

number of SNPs plotted: 3392

min P.value: 7.64E–19 [chr5:82860025]

max P.value: 10E–1 [chr5:82502188]

omitted GWAS Hits: NA, NA

## GWAS Catalog SNPs in Region

| <b>chr</b> | <b>pos (Mb)</b> | <b>trait</b>                      | <b>snp</b> |
|------------|-----------------|-----------------------------------|------------|
| 5          | 82.81912        | Laryngeal squamous cell carcinoma | rs310518   |
| 5          | 82.84549        | Diisocyanate-induced asthma       | rs3852186  |
| 5          | 82.88991        | Major depressive disorder         | rs310501   |
| 5          | 82.96073        | Visceral fat                      | rs3846635  |
| 5          | 82.98574        | Prostate cancer                   | rs4466137  |
| 5          | 83.17359        | Ankylosing spondylitis            | rs4552569  |

# TBSS\_L3\_Superior\_longitudinal\_fasciculus\_R

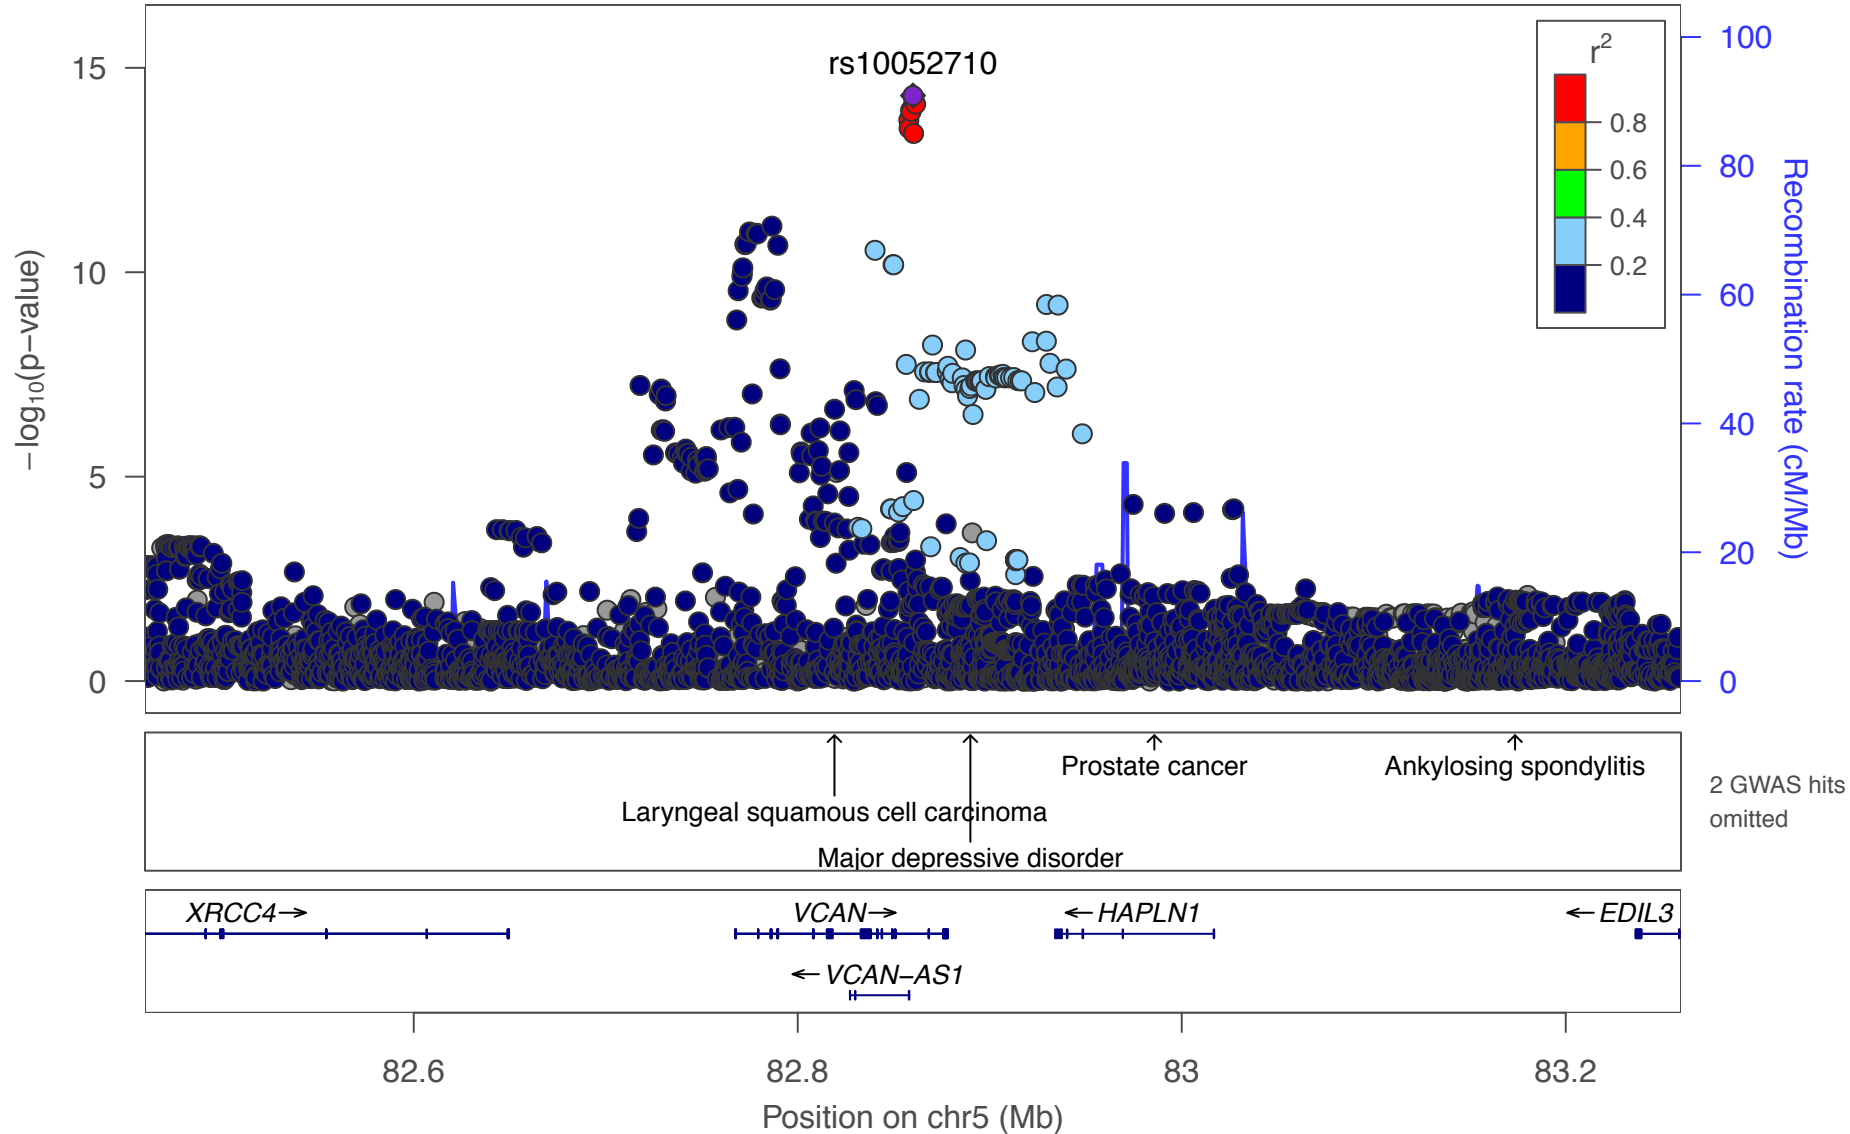

date: Thu Aug 17 17:52:01 2017

build: hg19

display range: chr5:82460025–83260025 [82460025–83260025]

hilite range: 0 – 0 [ 0 – 0 ]

reference SNP: chr5:82860025

number of SNPs plotted: 3392

min P.value: 4.76E–15 [chr5:82860025]

max P.value: 10E–1 [chr5:82521618]

omitted GWAS Hits: NA, NA

## GWAS Catalog SNPs in Region

| <b>chr</b> | <b>pos (Mb)</b> | <b>trait</b>                      | <b>snp</b> |
|------------|-----------------|-----------------------------------|------------|
| 5          | 82.81912        | Laryngeal squamous cell carcinoma | rs310518   |
| 5          | 82.84549        | Diisocyanate-induced asthma       | rs3852186  |
| 5          | 82.88991        | Major depressive disorder         | rs310501   |
| 5          | 82.96073        | Visceral fat                      | rs3846635  |
| 5          | 82.98574        | Prostate cancer                   | rs4466137  |
| 5          | 83.17359        | Ankylosing spondylitis            | rs4552569  |

# TBSS\_ICVF\_Middle\_cerebellar\_peduncle

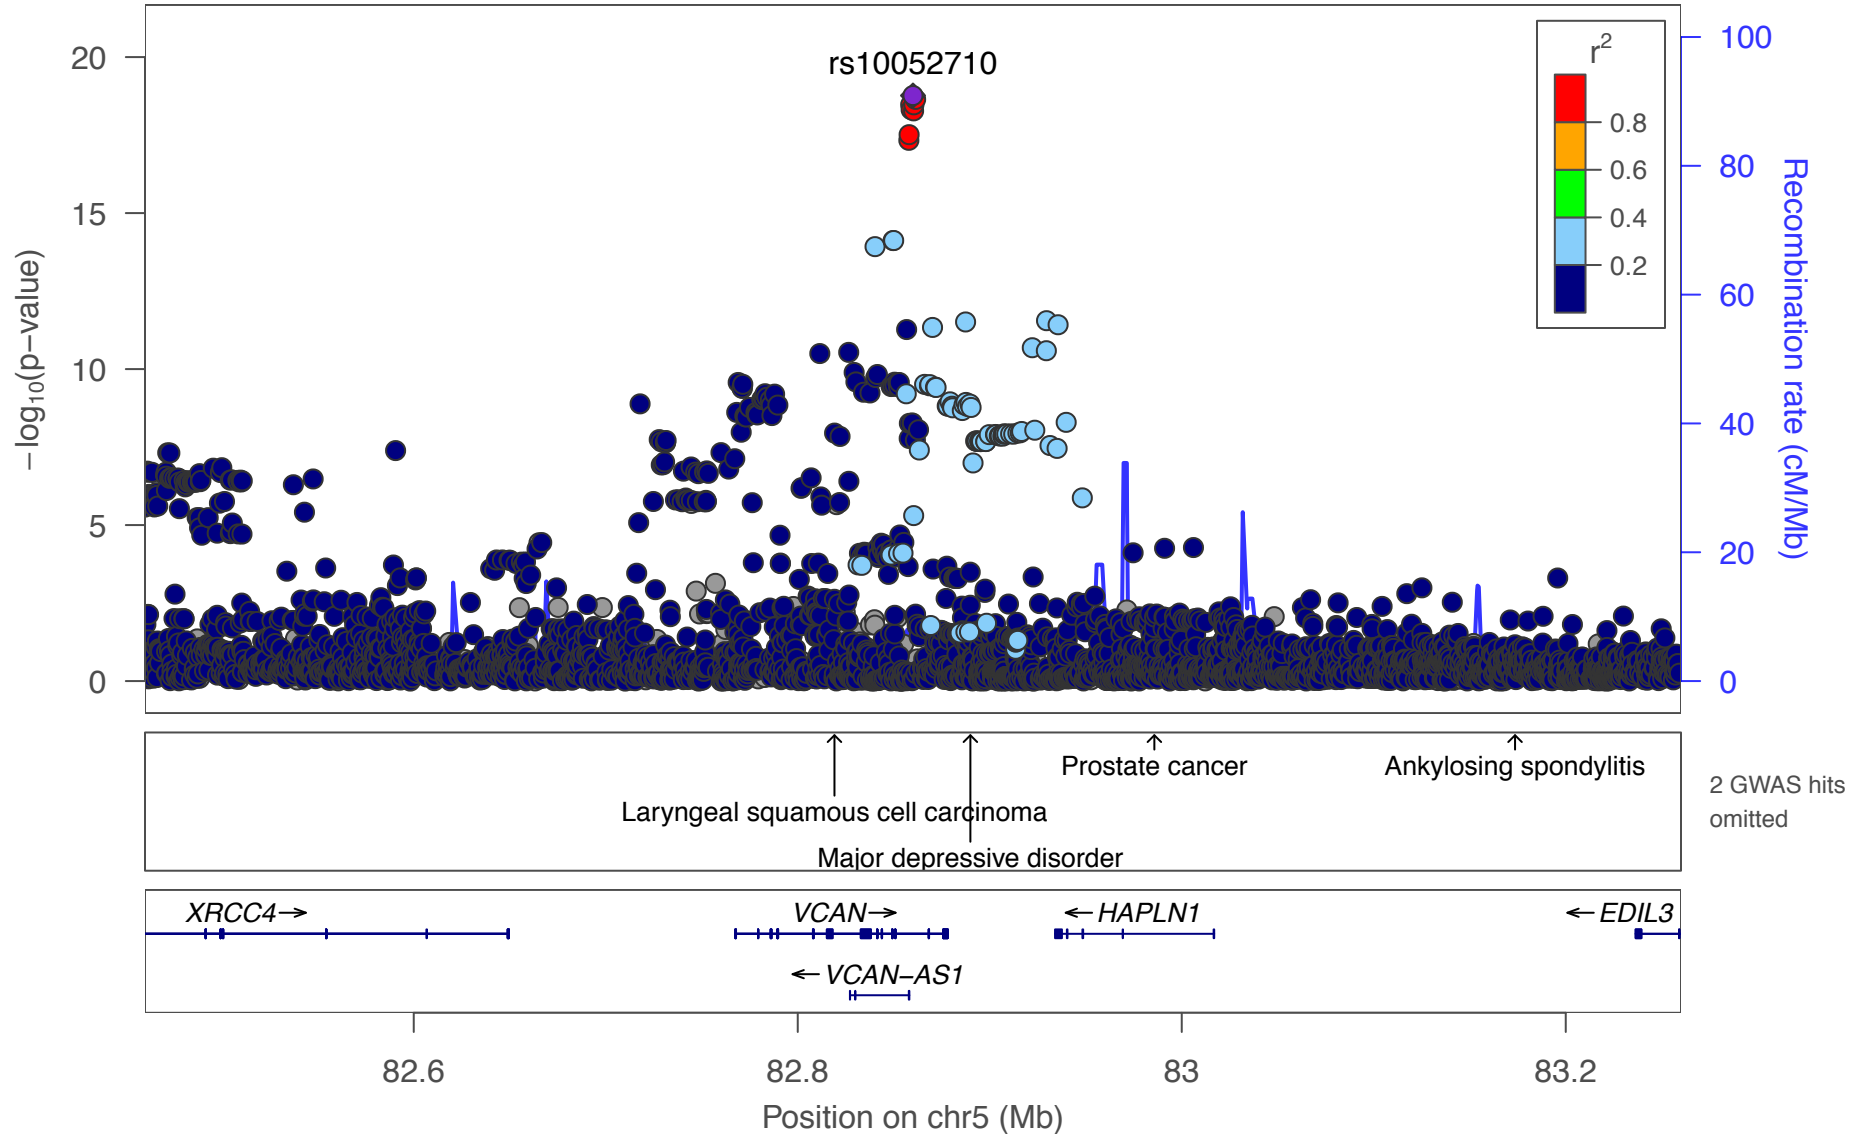

date: Thu Aug 17 17:52:01 2017

build: hg19

display range: chr5:82460025–83260025 [82460025–83260025]

hilite range: 0 – 0 [ 0 – 0 ]

reference SNP: chr5:82860025

number of SNPs plotted: 3392

min P.value: 1.71E–19 [chr5:82860025]

max P.value: 9.99E–1 [chr5:82907161]

omitted GWAS Hits: NA, NA



## GWAS Catalog SNPs in Region

| <b>chr</b> | <b>pos (Mb)</b> | <b>trait</b>                      | <b>snp</b> |
|------------|-----------------|-----------------------------------|------------|
| 5          | 82.81912        | Laryngeal squamous cell carcinoma | rs310518   |
| 5          | 82.84549        | Diisocyanate-induced asthma       | rs3852186  |
| 5          | 82.88991        | Major depressive disorder         | rs310501   |
| 5          | 82.96073        | Visceral fat                      | rs3846635  |
| 5          | 82.98574        | Prostate cancer                   | rs4466137  |
| 5          | 83.17359        | Ankylosing spondylitis            | rs4552569  |

# TBSS\_ICVF\_Body\_of\_corpus\_callosum

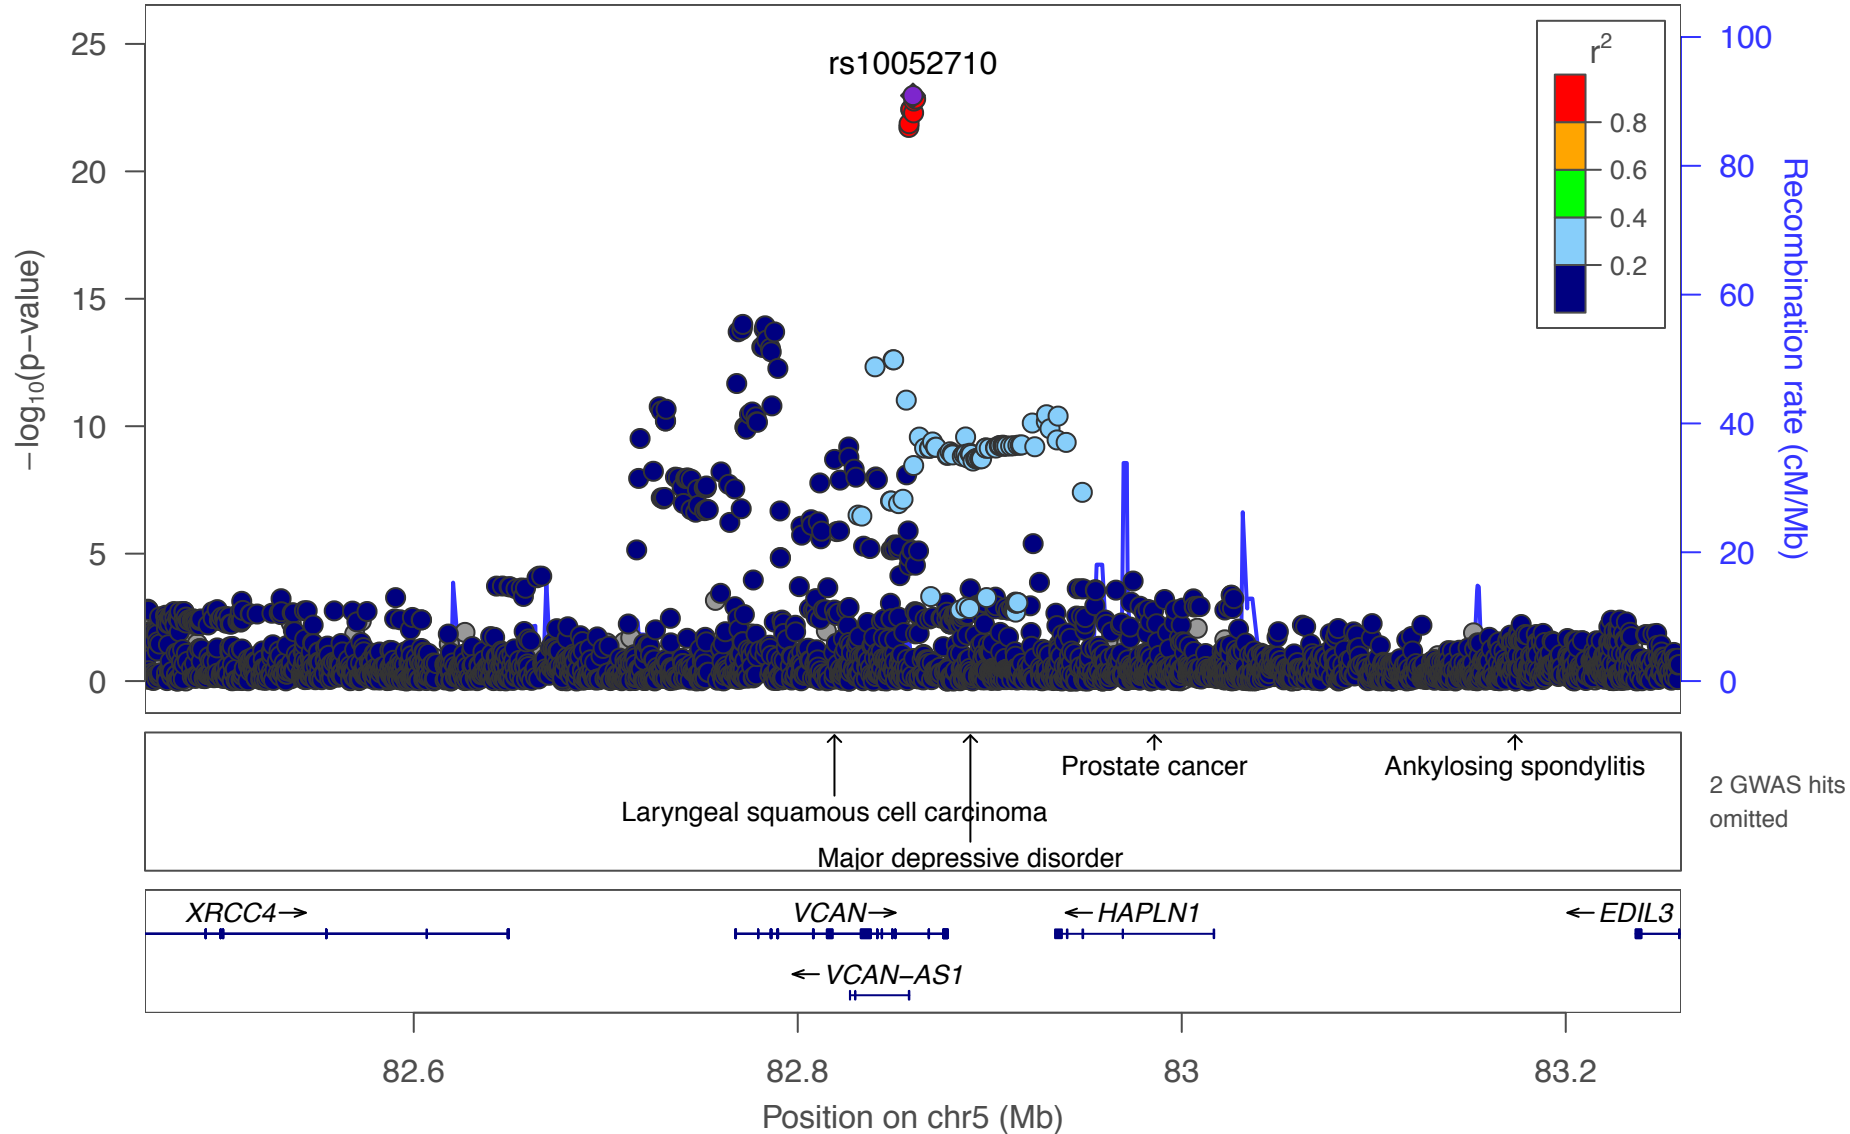

date: Thu Aug 17 17:52:01 2017

build: hg19

display range: chr5:82460025–83260025 [82460025–83260025]

hilite range: 0 – 0 [ 0 – 0 ]

reference SNP: chr5:82860025

number of SNPs plotted: 3392

min P.value: 1.06E–23 [chr5:82860025]

max P.value: 10E–1 [chr5:82477097]

omitted GWAS Hits: NA, NA

## GWAS Catalog SNPs in Region

| <b>chr</b> | <b>pos (Mb)</b> | <b>trait</b>                      | <b>snp</b> |
|------------|-----------------|-----------------------------------|------------|
| 5          | 82.81912        | Laryngeal squamous cell carcinoma | rs310518   |
| 5          | 82.84549        | Diisocyanate-induced asthma       | rs3852186  |
| 5          | 82.88991        | Major depressive disorder         | rs310501   |
| 5          | 82.96073        | Visceral fat                      | rs3846635  |
| 5          | 82.98574        | Prostate cancer                   | rs4466137  |
| 5          | 83.17359        | Ankylosing spondylitis            | rs4552569  |

# TBSS\_ICVF\_Splenium\_of\_corpus\_callosum

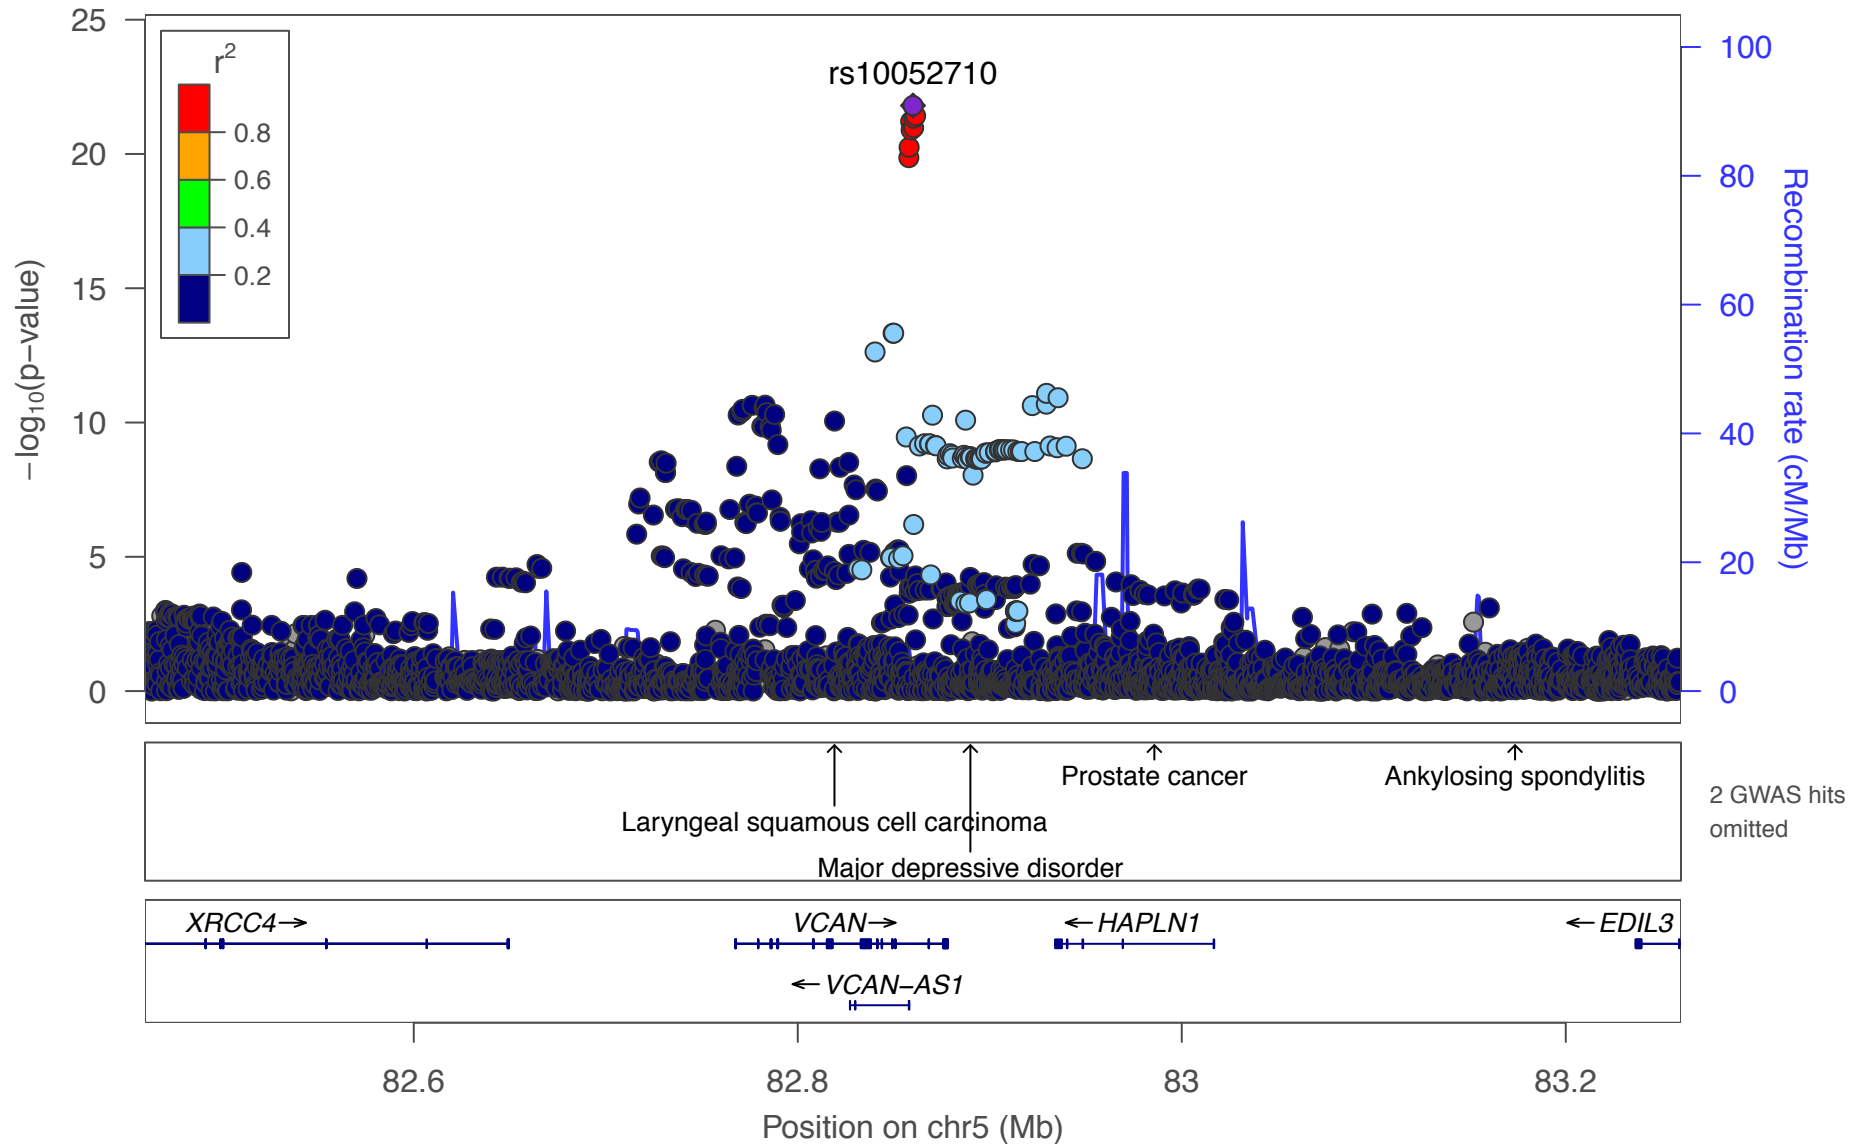

date: Thu Aug 17 17:52:01 2017

build: hg19

display range: chr5:82460025–83260025 [82460025–83260025]

hilite range: 0 – 0 [ 0 – 0 ]

reference SNP: chr5:82860025

number of SNPs plotted: 3392

min P.value: 1.57E–22 [chr5:82860025]

max P.value: 9.99E–1 [chr5:83072612]

omitted GWAS Hits: NA, NA

## GWAS Catalog SNPs in Region

| <b>chr</b> | <b>pos (Mb)</b> | <b>trait</b>                      | <b>snp</b> |
|------------|-----------------|-----------------------------------|------------|
| 5          | 82.81912        | Laryngeal squamous cell carcinoma | rs310518   |
| 5          | 82.84549        | Diisocyanate-induced asthma       | rs3852186  |
| 5          | 82.88991        | Major depressive disorder         | rs310501   |
| 5          | 82.96073        | Visceral fat                      | rs3846635  |
| 5          | 82.98574        | Prostate cancer                   | rs4466137  |
| 5          | 83.17359        | Ankylosing spondylitis            | rs4552569  |

# TBSS\_ICVF\_Inferior\_cerebellar\_peduncle\_L

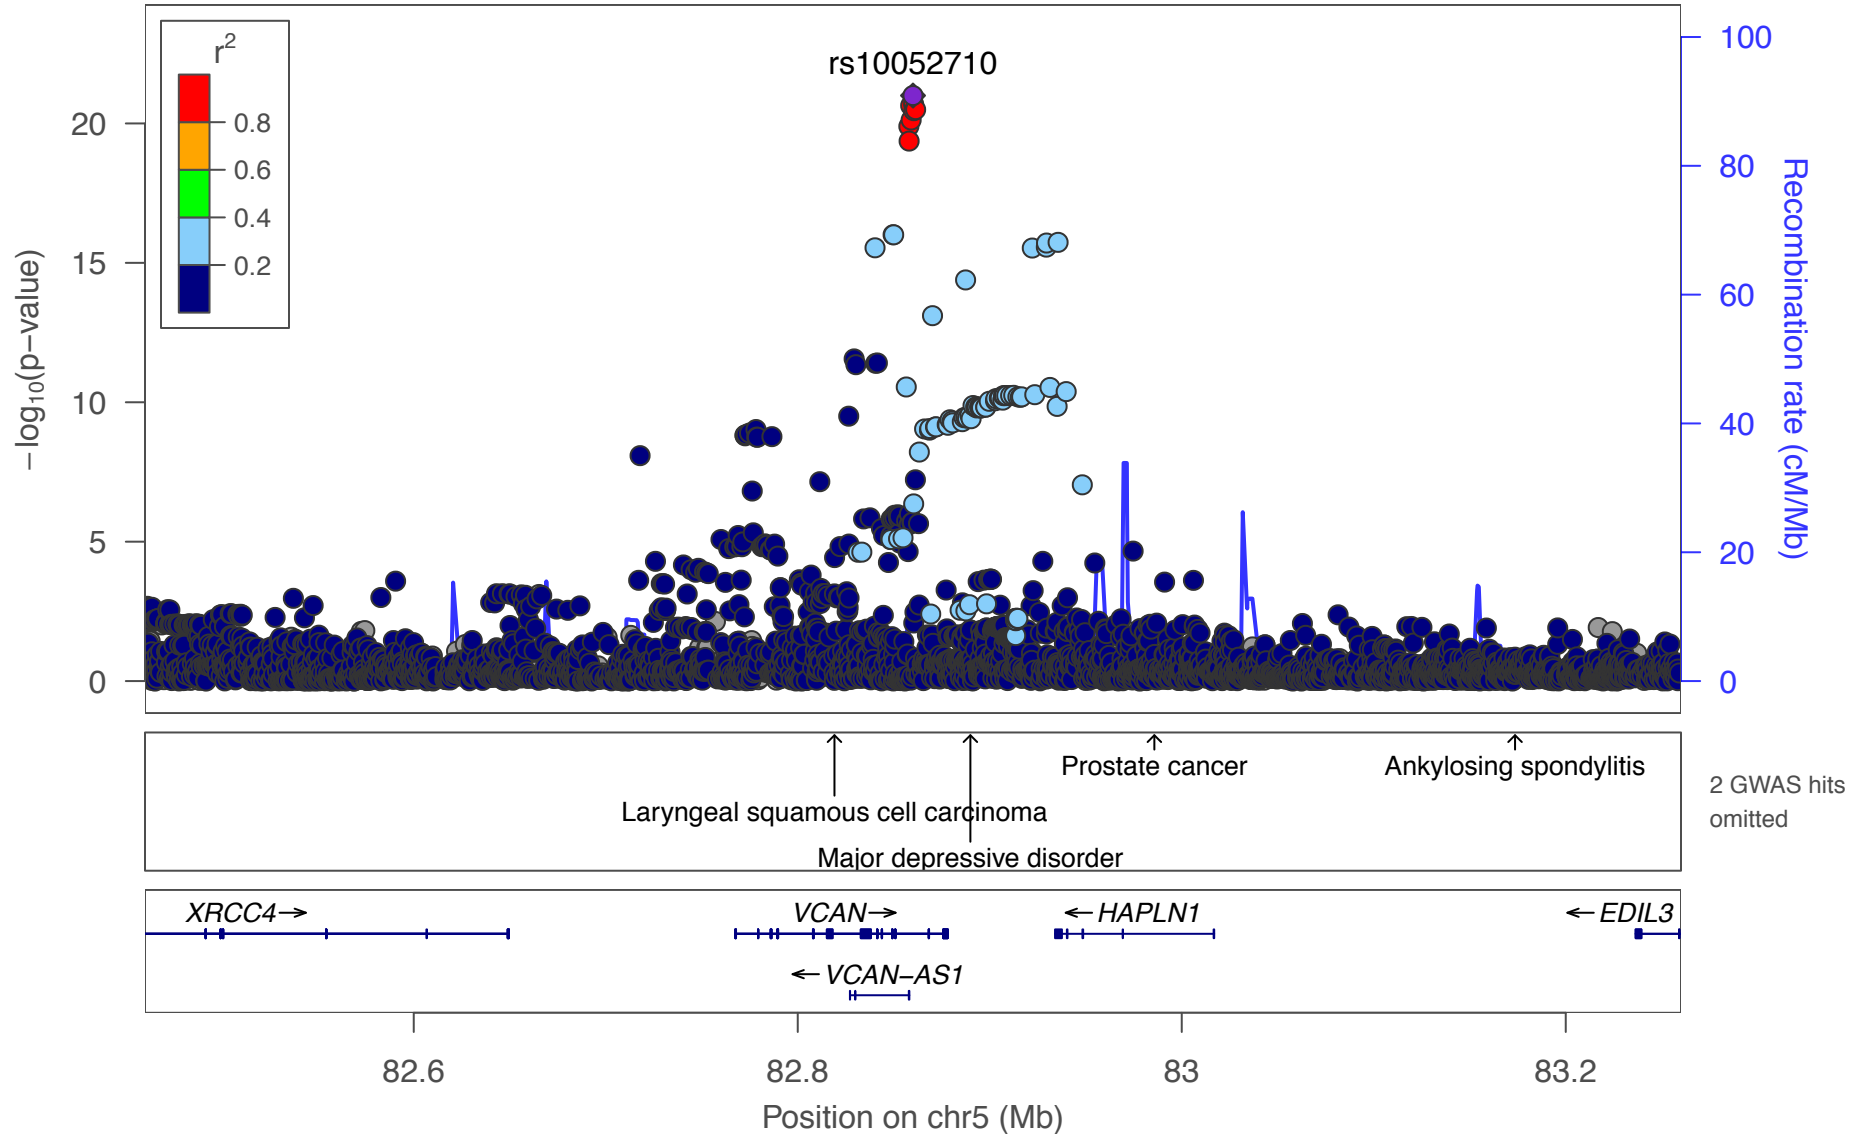



date: Thu Aug 17 17:52:01 2017

build: hg19

display range: chr5:82460025–83260025 [82460025–83260025]

hilite range: 0 – 0 [ 0 – 0 ]

reference SNP: chr5:82860025

number of SNPs plotted: 3392

min P.value: 1E–21 [chr5:82860025]

max P.value: 10E–1 [chr5:82568930]

omitted GWAS Hits: NA, NA

## GWAS Catalog SNPs in Region

| <b>chr</b> | <b>pos (Mb)</b> | <b>trait</b>                      | <b>snp</b> |
|------------|-----------------|-----------------------------------|------------|
| 5          | 82.81912        | Laryngeal squamous cell carcinoma | rs310518   |
| 5          | 82.84549        | Diisocyanate-induced asthma       | rs3852186  |
| 5          | 82.88991        | Major depressive disorder         | rs310501   |
| 5          | 82.96073        | Visceral fat                      | rs3846635  |
| 5          | 82.98574        | Prostate cancer                   | rs4466137  |
| 5          | 83.17359        | Ankylosing spondylitis            | rs4552569  |

# TBSS\_ICVF\_Posterior\_limb\_of\_internal\_capsule\_R

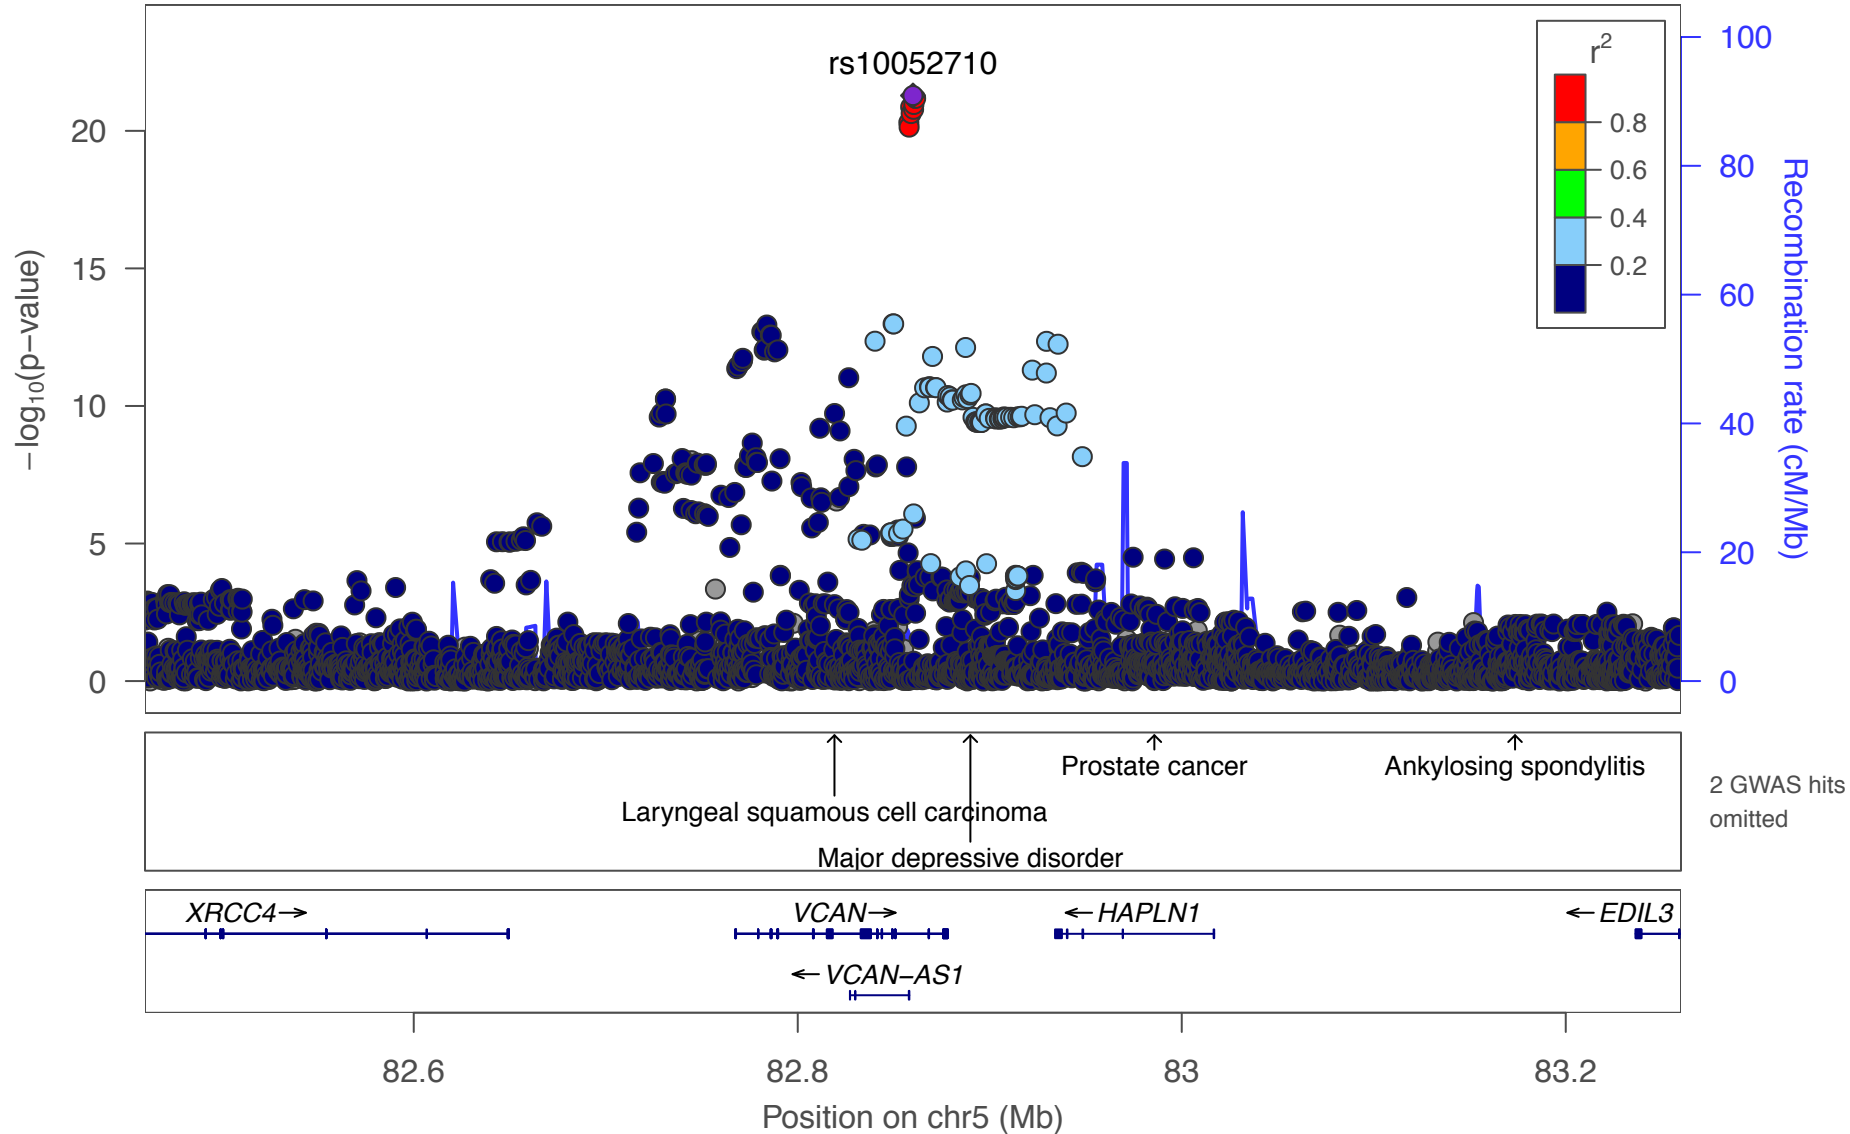

date: Thu Aug 17 17:52:01 2017

build: hg19

display range: chr5:82460025–83260025 [82460025–83260025]

hilite range: 0 – 0 [ 0 – 0 ]

reference SNP: chr5:82860025

number of SNPs plotted: 3392

min P.value: 5.21E–22 [chr5:82860025]

max P.value: 9.99E–1 [chr5:83125143]

omitted GWAS Hits: NA, NA

## GWAS Catalog SNPs in Region

| <b>chr</b> | <b>pos (Mb)</b> | <b>trait</b>                      | <b>snp</b> |
|------------|-----------------|-----------------------------------|------------|
| 5          | 82.81912        | Laryngeal squamous cell carcinoma | rs310518   |
| 5          | 82.84549        | Diisocyanate-induced asthma       | rs3852186  |
| 5          | 82.88991        | Major depressive disorder         | rs310501   |
| 5          | 82.96073        | Visceral fat                      | rs3846635  |
| 5          | 82.98574        | Prostate cancer                   | rs4466137  |
| 5          | 83.17359        | Ankylosing spondylitis            | rs4552569  |

# TBSS\_ICVF\_Posterior\_thalamic\_radiation\_R

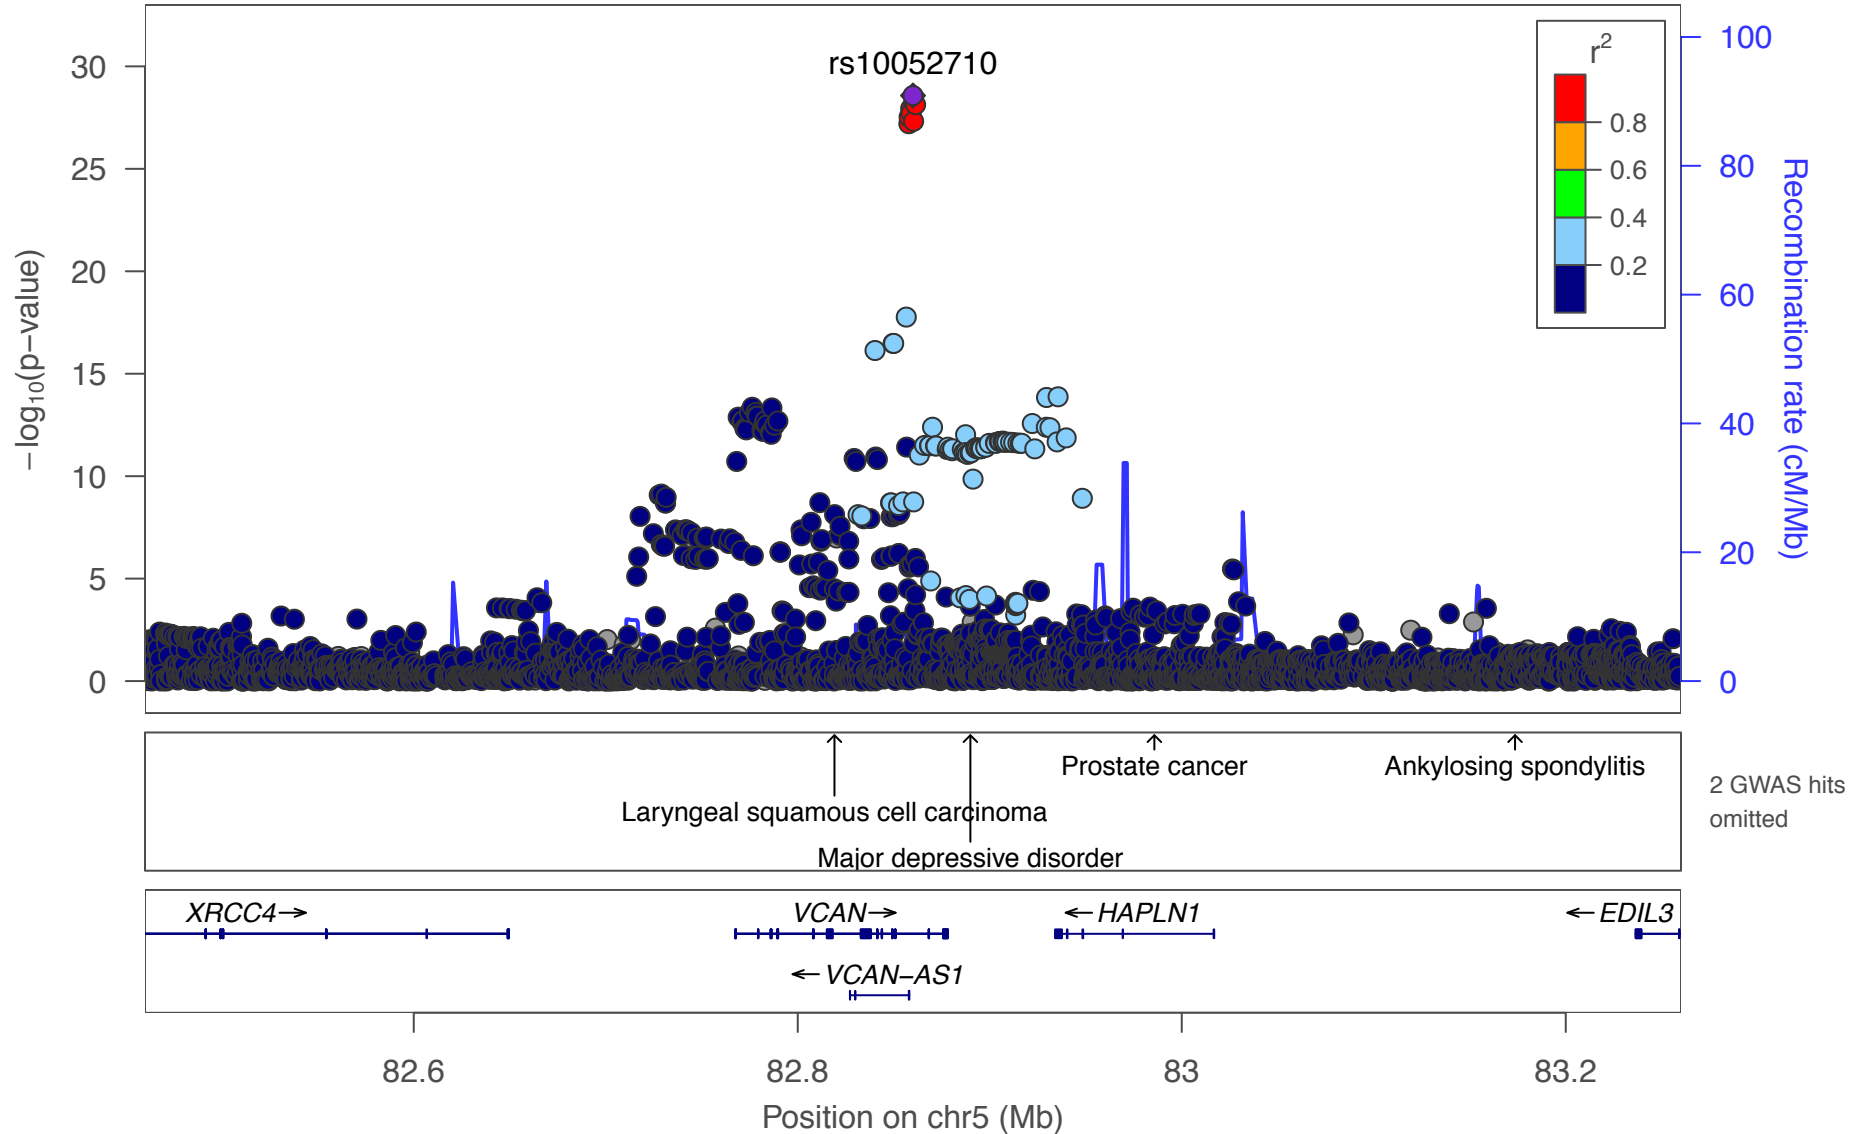

date: Thu Aug 17 17:52:01 2017

build: hg19

display range: chr5:82460025–83260025 [82460025–83260025]

hilite range: 0 – 0 [ 0 – 0 ]

reference SNP: chr5:82860025

number of SNPs plotted: 3392

min P.value: 2.65E–29 [chr5:82860025]

max P.value: 10E–1 [chr5:82775906]

omitted GWAS Hits: NA, NA

## GWAS Catalog SNPs in Region

| <b>chr</b> | <b>pos (Mb)</b> | <b>trait</b>                      | <b>snp</b> |
|------------|-----------------|-----------------------------------|------------|
| 5          | 82.81912        | Laryngeal squamous cell carcinoma | rs310518   |
| 5          | 82.84549        | Diisocyanate-induced asthma       | rs3852186  |
| 5          | 82.88991        | Major depressive disorder         | rs310501   |
| 5          | 82.96073        | Visceral fat                      | rs3846635  |
| 5          | 82.98574        | Prostate cancer                   | rs4466137  |
| 5          | 83.17359        | Ankylosing spondylitis            | rs4552569  |



# TBSS\_ICVF\_Posterior\_thalamic\_radiation\_L

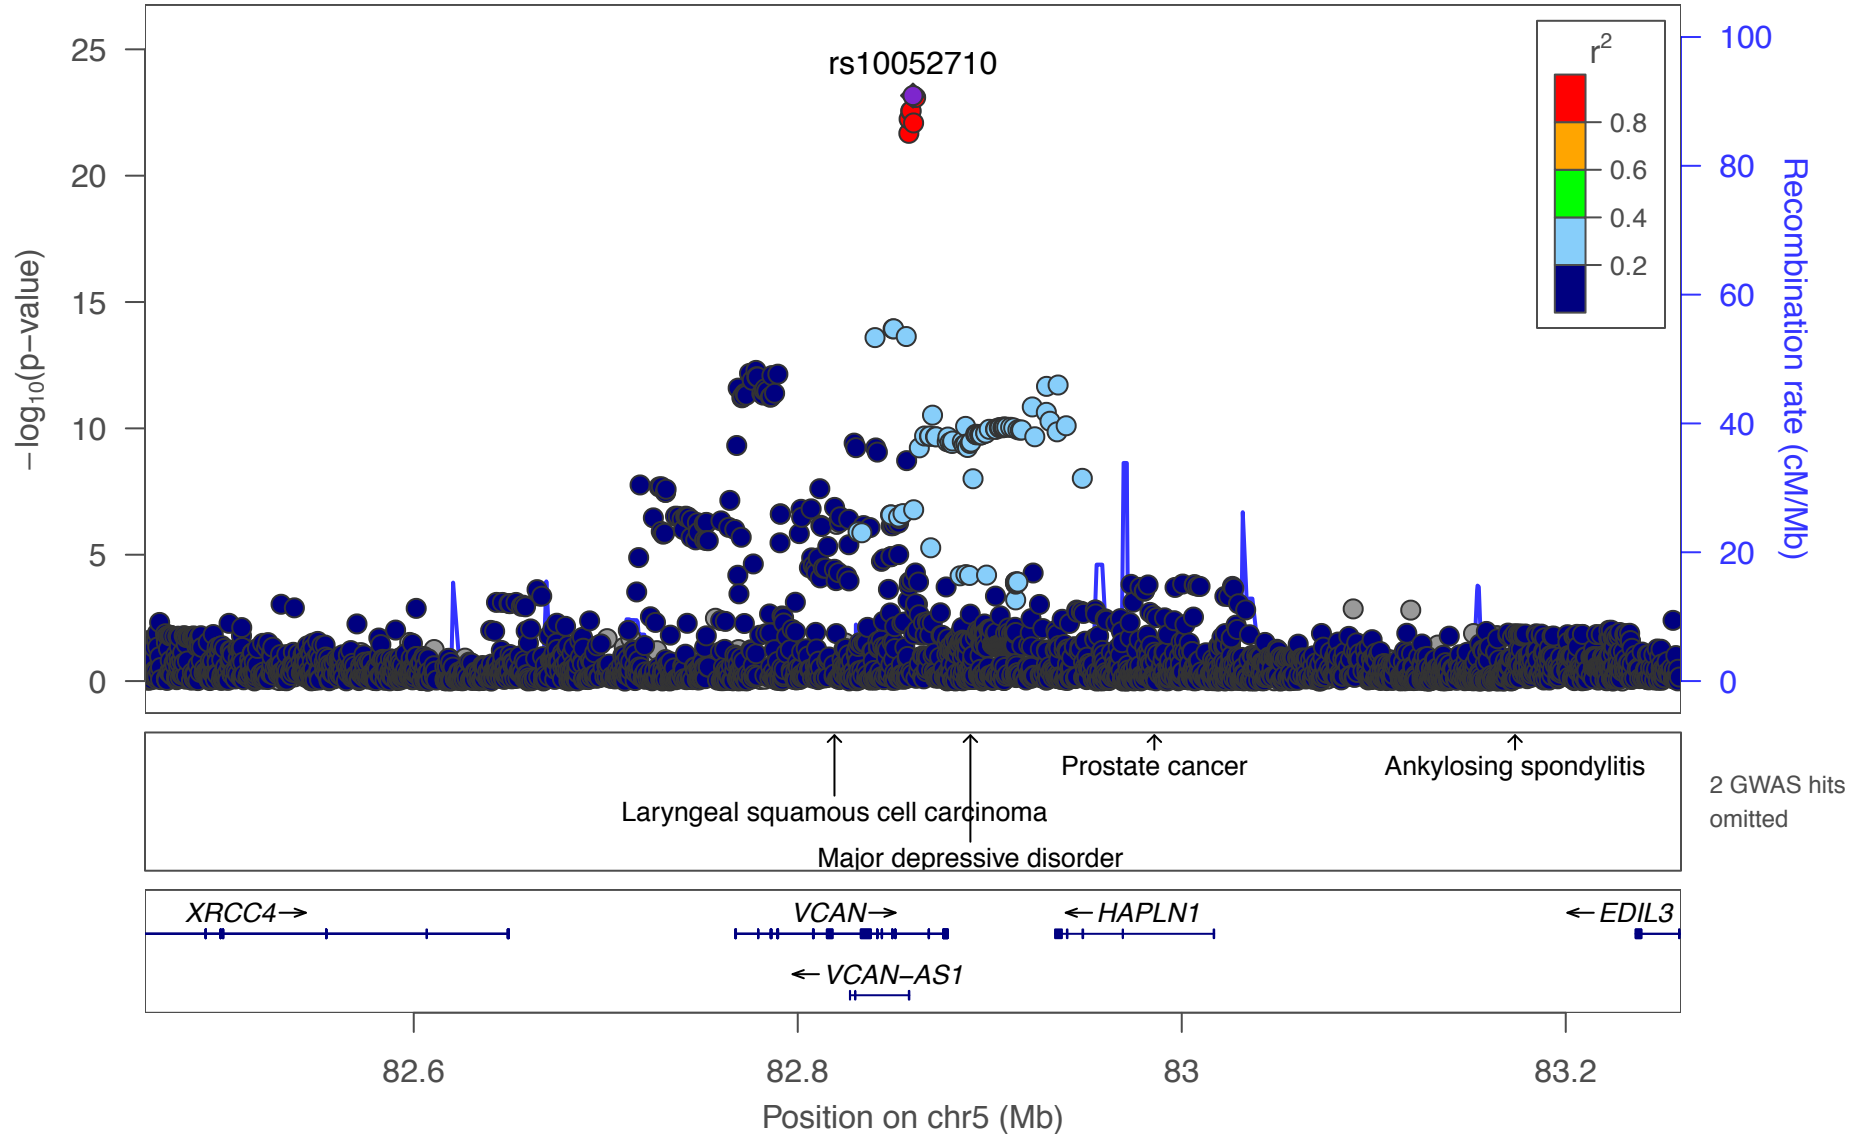

date: Thu Aug 17 17:52:01 2017

build: hg19

display range: chr5:82460025–83260025 [82460025–83260025]

hilite range: 0 – 0 [ 0 – 0 ]

reference SNP: chr5:82860025

number of SNPs plotted: 3392

min P.value: 6.75E–24 [chr5:82860025]

max P.value: 10E–1 [chr5:82640336]

omitted GWAS Hits: NA, NA

## GWAS Catalog SNPs in Region

| <b>chr</b> | <b>pos (Mb)</b> | <b>trait</b>                      | <b>snp</b> |
|------------|-----------------|-----------------------------------|------------|
| 5          | 82.81912        | Laryngeal squamous cell carcinoma | rs310518   |
| 5          | 82.84549        | Diisocyanate-induced asthma       | rs3852186  |
| 5          | 82.88991        | Major depressive disorder         | rs310501   |
| 5          | 82.96073        | Visceral fat                      | rs3846635  |
| 5          | 82.98574        | Prostate cancer                   | rs4466137  |
| 5          | 83.17359        | Ankylosing spondylitis            | rs4552569  |

# TBSS\_ICVF\_Tapetum\_R

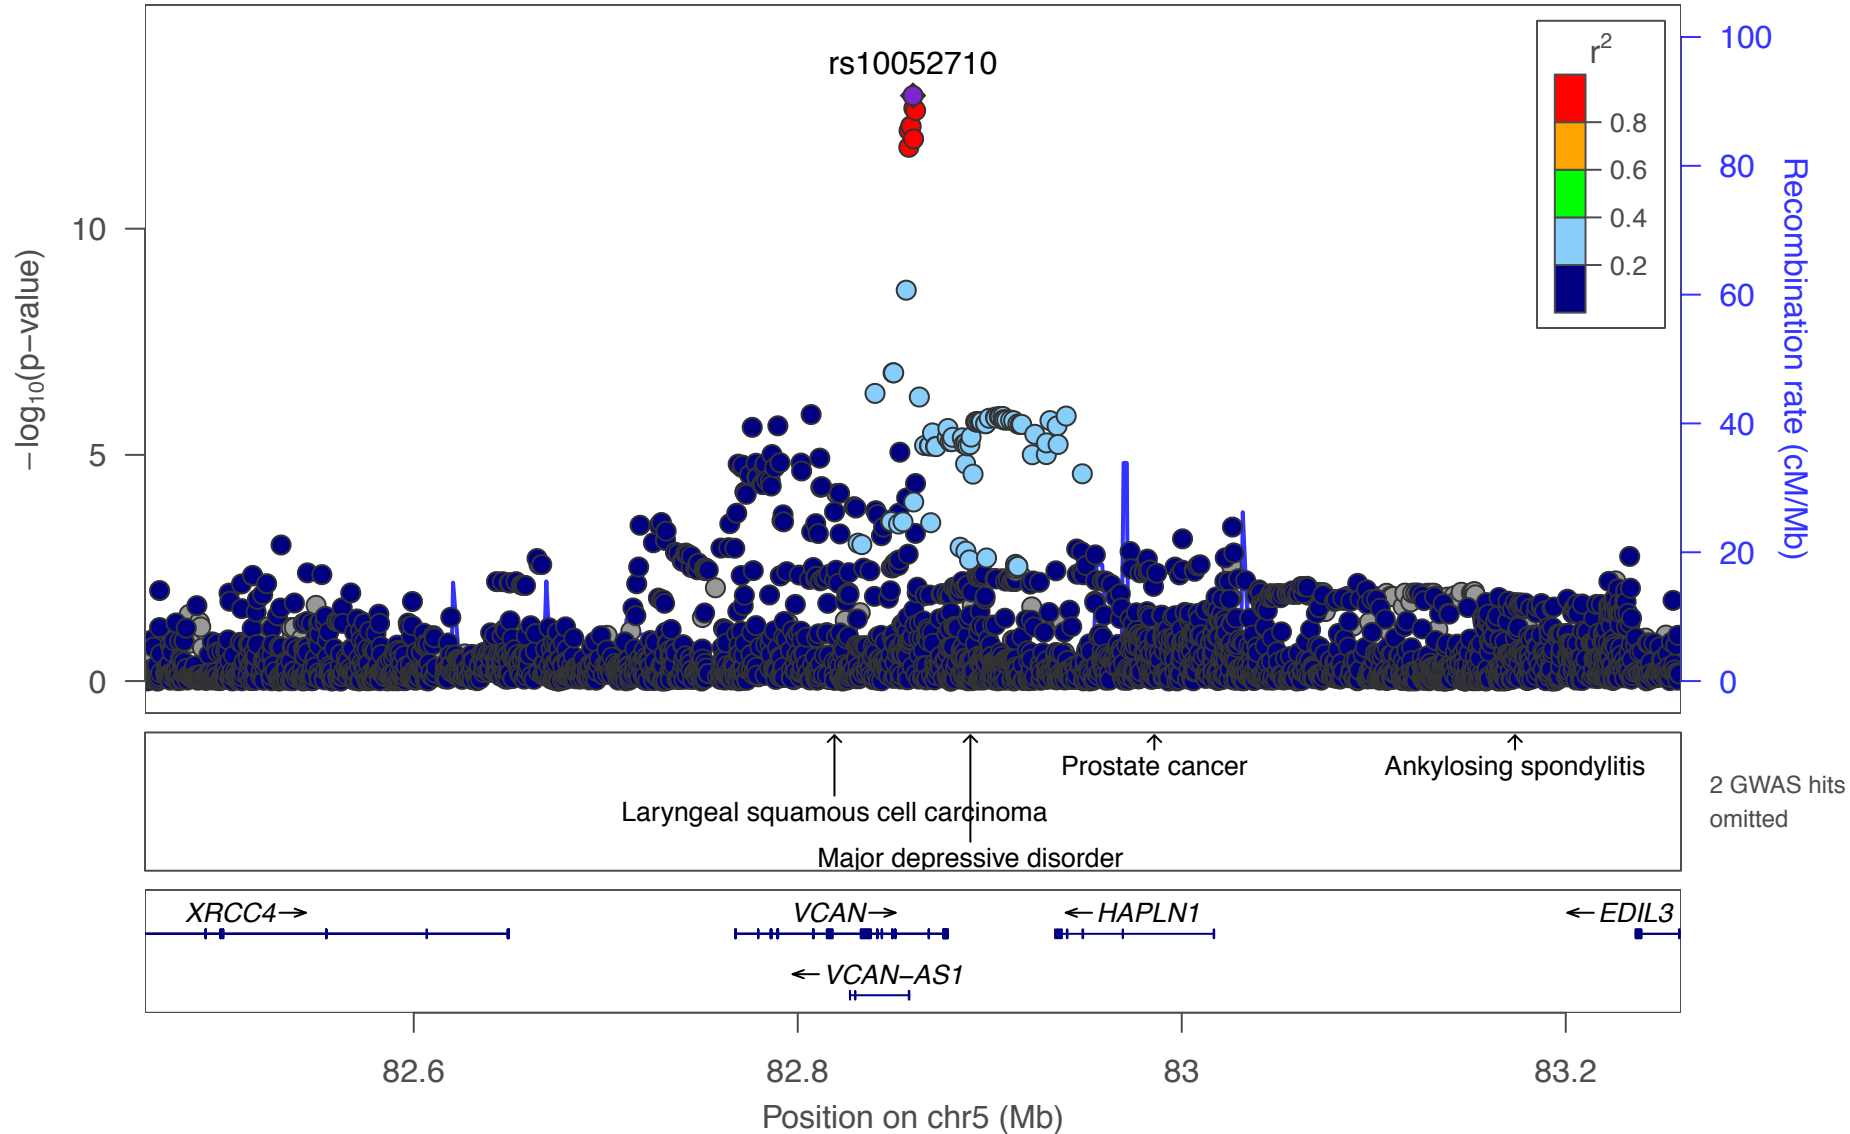

date: Thu Aug 17 17:52:01 2017

build: hg19

display range: chr5:82460025–83260025 [82460025–83260025]

hilite range: 0 – 0 [ 0 – 0 ]

reference SNP: chr5:82860025

number of SNPs plotted: 3392

min P.value: 1.14E–13 [chr5:82860025]

max P.value: 10E–1 [chr5:83136574]

omitted GWAS Hits: NA, NA

## GWAS Catalog SNPs in Region

| <b>chr</b> | <b>pos (Mb)</b> | <b>trait</b>                      | <b>snp</b> |
|------------|-----------------|-----------------------------------|------------|
| 5          | 82.81912        | Laryngeal squamous cell carcinoma | rs310518   |
| 5          | 82.84549        | Diisocyanate-induced asthma       | rs3852186  |
| 5          | 82.88991        | Major depressive disorder         | rs310501   |
| 5          | 82.96073        | Visceral fat                      | rs3846635  |
| 5          | 82.98574        | Prostate cancer                   | rs4466137  |
| 5          | 83.17359        | Ankylosing spondylitis            | rs4552569  |

# TBSS\_ICVF\_Tapetum\_L

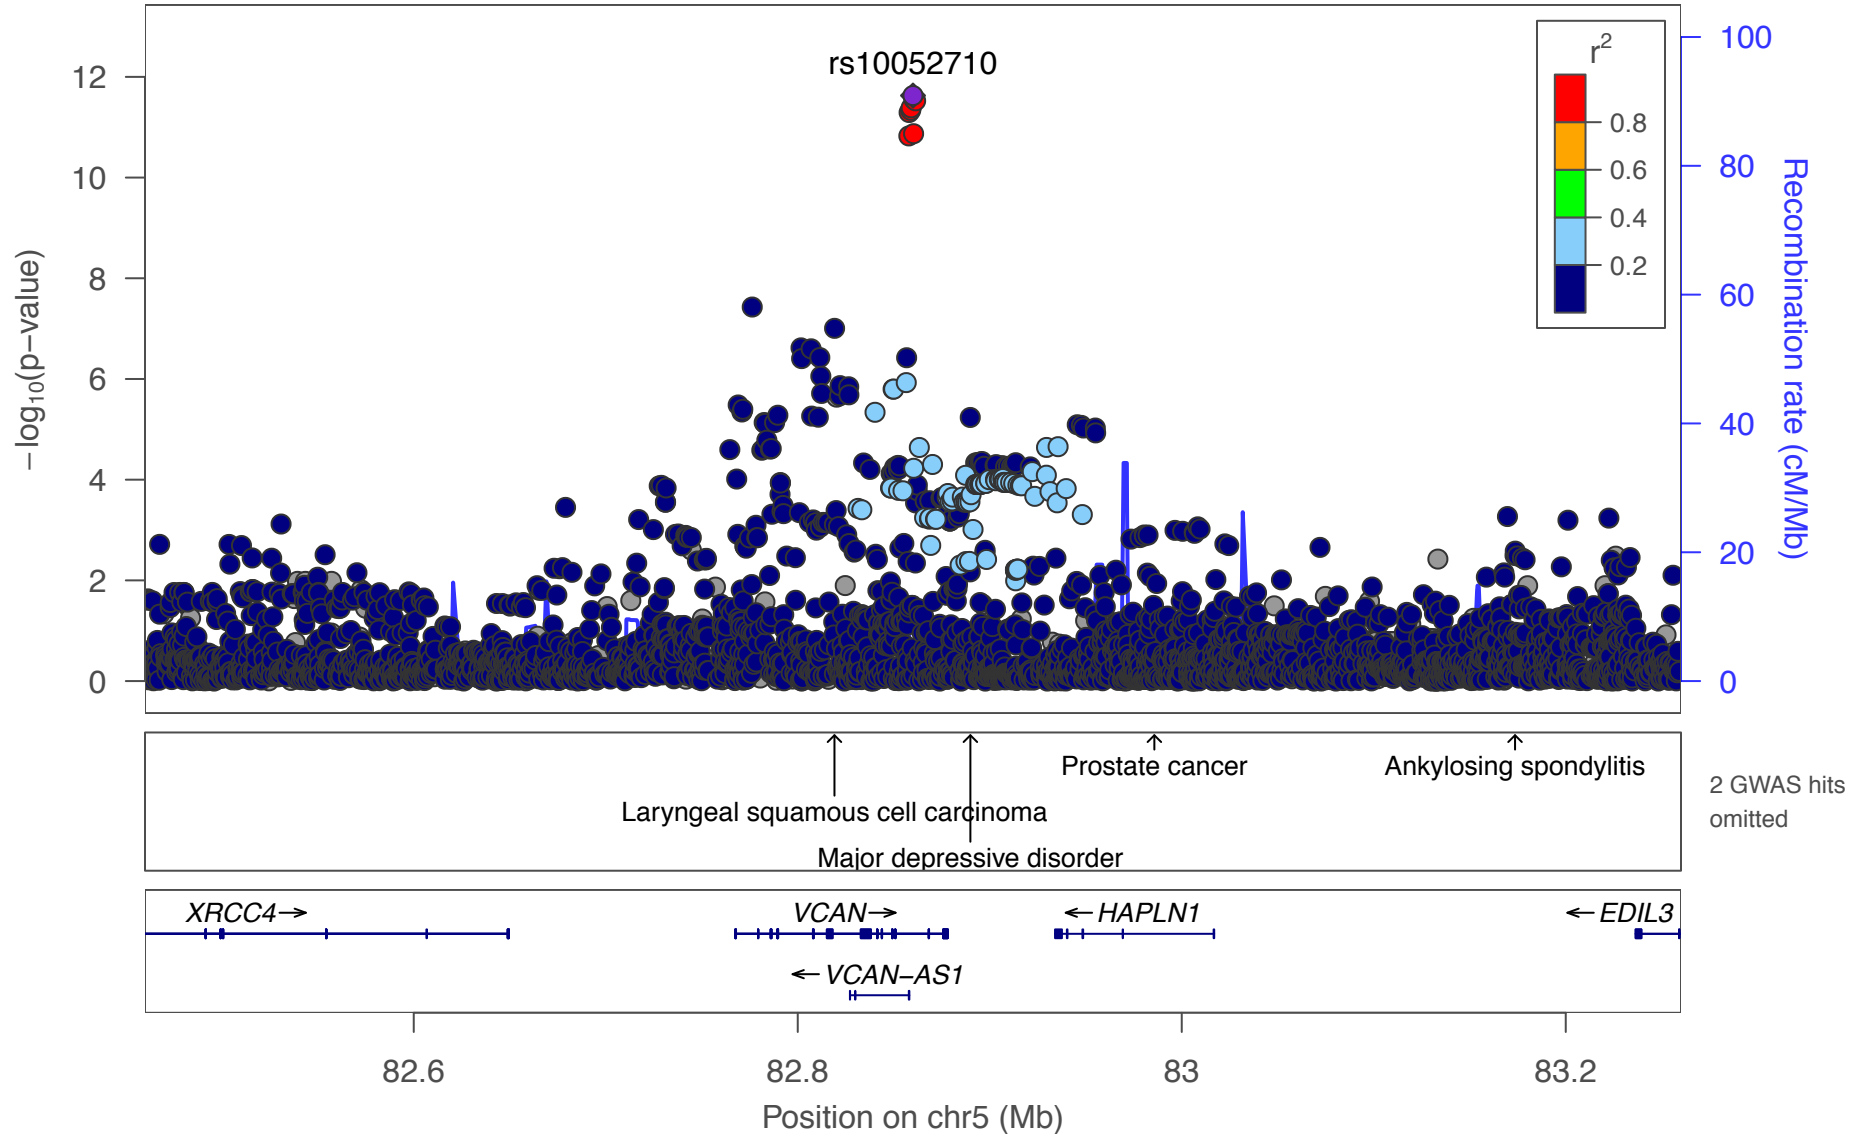

date: Thu Aug 17 17:52:01 2017

build: hg19

display range: chr5:82460025–83260025 [82460025–83260025]

hilite range: 0 – 0 [ 0 – 0 ]

reference SNP: chr5:82860025

number of SNPs plotted: 3392

min P.value: 2.35E–12 [chr5:82860025]

max P.value: 10E–1 [chr5:82885093]

omitted GWAS Hits: NA, NA



## GWAS Catalog SNPs in Region

| <b>chr</b> | <b>pos (Mb)</b> | <b>trait</b>                      | <b>snp</b> |
|------------|-----------------|-----------------------------------|------------|
| 5          | 82.81912        | Laryngeal squamous cell carcinoma | rs310518   |
| 5          | 82.84549        | Diisocyanate-induced asthma       | rs3852186  |
| 5          | 82.88991        | Major depressive disorder         | rs310501   |
| 5          | 82.96073        | Visceral fat                      | rs3846635  |
| 5          | 82.98574        | Prostate cancer                   | rs4466137  |
| 5          | 83.17359        | Ankylosing spondylitis            | rs4552569  |

# ProbtrackX\_FA\_atr\_r

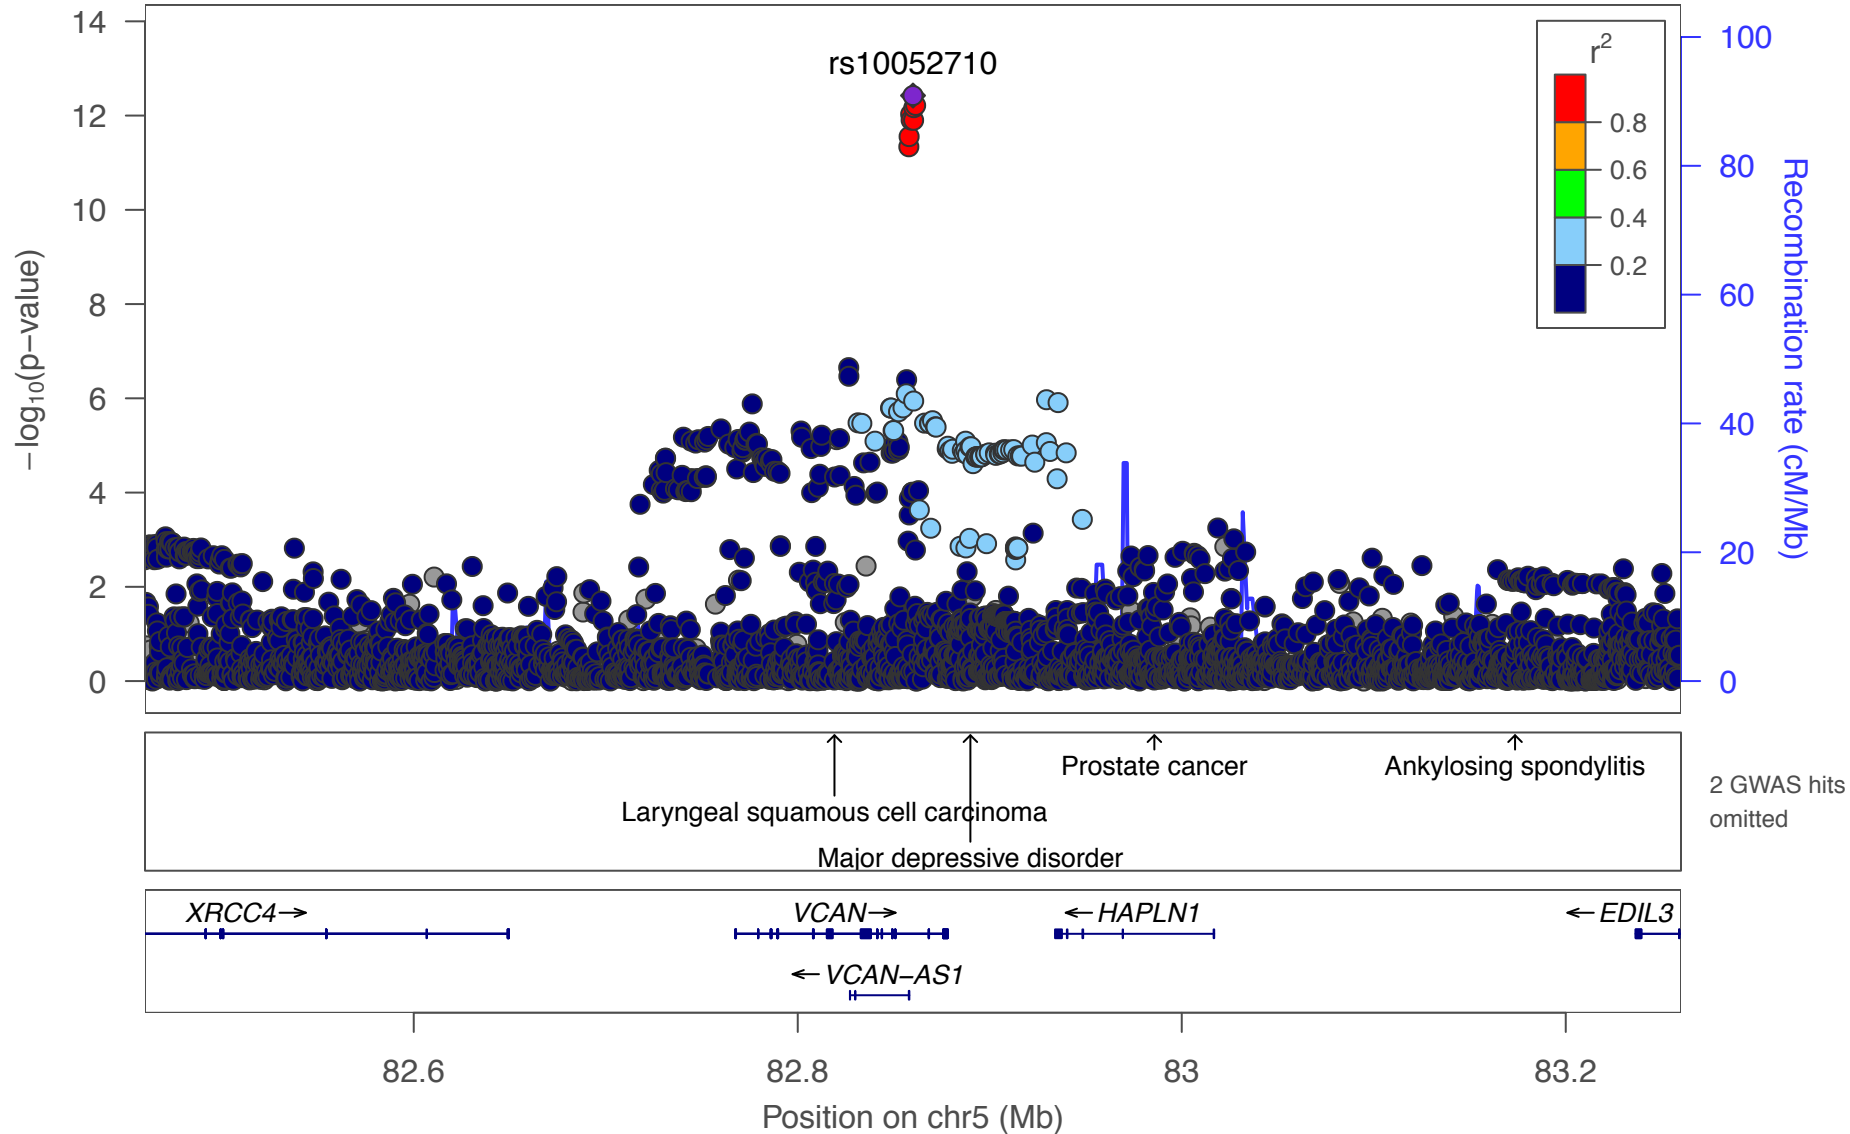

date: Thu Aug 17 17:52:01 2017

build: hg19

display range: chr5:82460025–83260025 [82460025–83260025]

hilite range: 0 – 0 [ 0 – 0 ]

reference SNP: chr5:82860025

number of SNPs plotted: 3392

min P.value: 3.76E–13 [chr5:82860025]

max P.value: 10E–1 [chr5:82831442]

omitted GWAS Hits: NA, NA

## GWAS Catalog SNPs in Region

| <b>chr</b> | <b>pos (Mb)</b> | <b>trait</b>                      | <b>snp</b> |
|------------|-----------------|-----------------------------------|------------|
| 5          | 82.81912        | Laryngeal squamous cell carcinoma | rs310518   |
| 5          | 82.84549        | Diisocyanate-induced asthma       | rs3852186  |
| 5          | 82.88991        | Major depressive disorder         | rs310501   |
| 5          | 82.96073        | Visceral fat                      | rs3846635  |
| 5          | 82.98574        | Prostate cancer                   | rs4466137  |
| 5          | 83.17359        | Ankylosing spondylitis            | rs4552569  |

# ProbtrackX\_FA\_ifo\_I

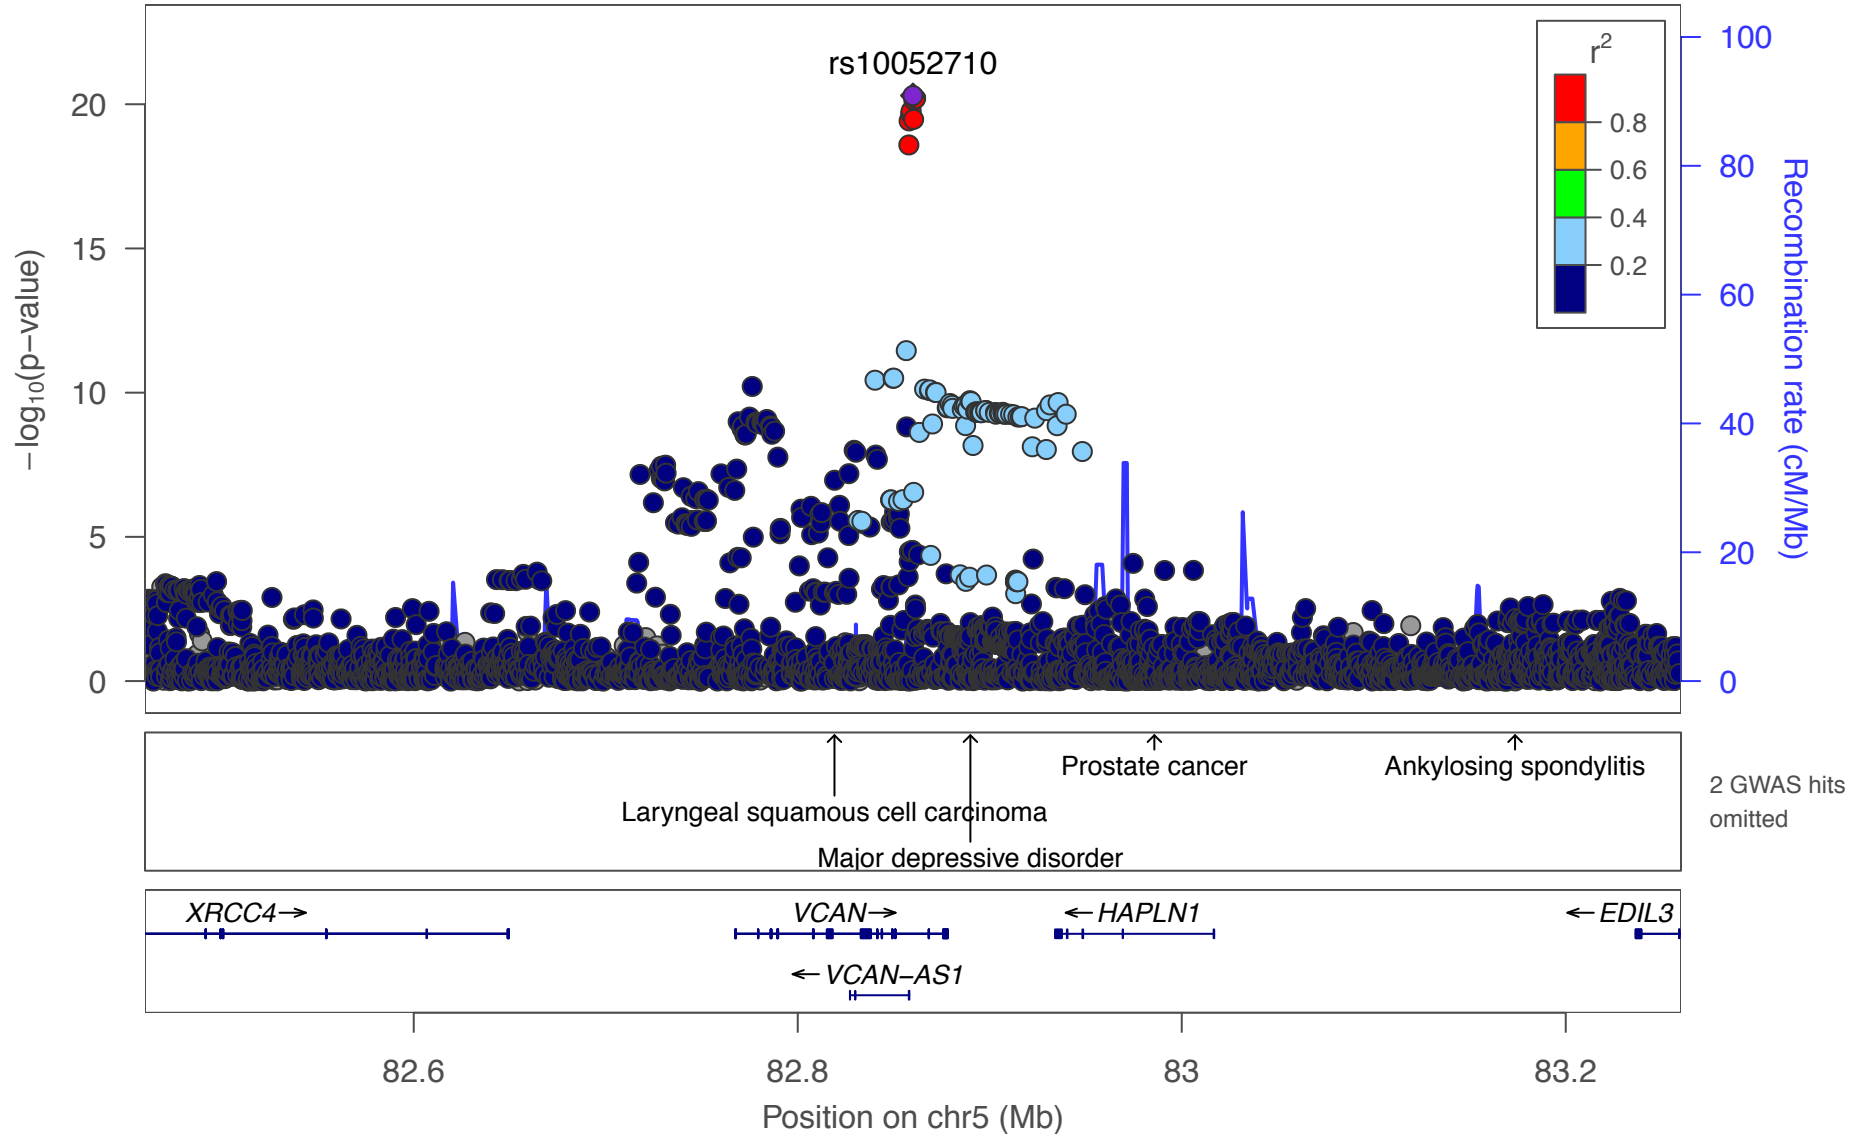

date: Thu Aug 17 17:52:01 2017

build: hg19

display range: chr5:82460025–83260025 [82460025–83260025]

hilite range: 0 – 0 [ 0 – 0 ]

reference SNP: chr5:82860025

number of SNPs plotted: 3392

min P.value: 5E–21 [chr5:82860025]

max P.value: 10E–1 [chr5:82749099]

omitted GWAS Hits: NA, NA

## GWAS Catalog SNPs in Region

| <b>chr</b> | <b>pos (Mb)</b> | <b>trait</b>                      | <b>snp</b> |
|------------|-----------------|-----------------------------------|------------|
| 5          | 82.81912        | Laryngeal squamous cell carcinoma | rs310518   |
| 5          | 82.84549        | Diisocyanate-induced asthma       | rs3852186  |
| 5          | 82.88991        | Major depressive disorder         | rs310501   |
| 5          | 82.96073        | Visceral fat                      | rs3846635  |
| 5          | 82.98574        | Prostate cancer                   | rs4466137  |
| 5          | 83.17359        | Ankylosing spondylitis            | rs4552569  |

# ProtrackX\_FA\_ifo\_r

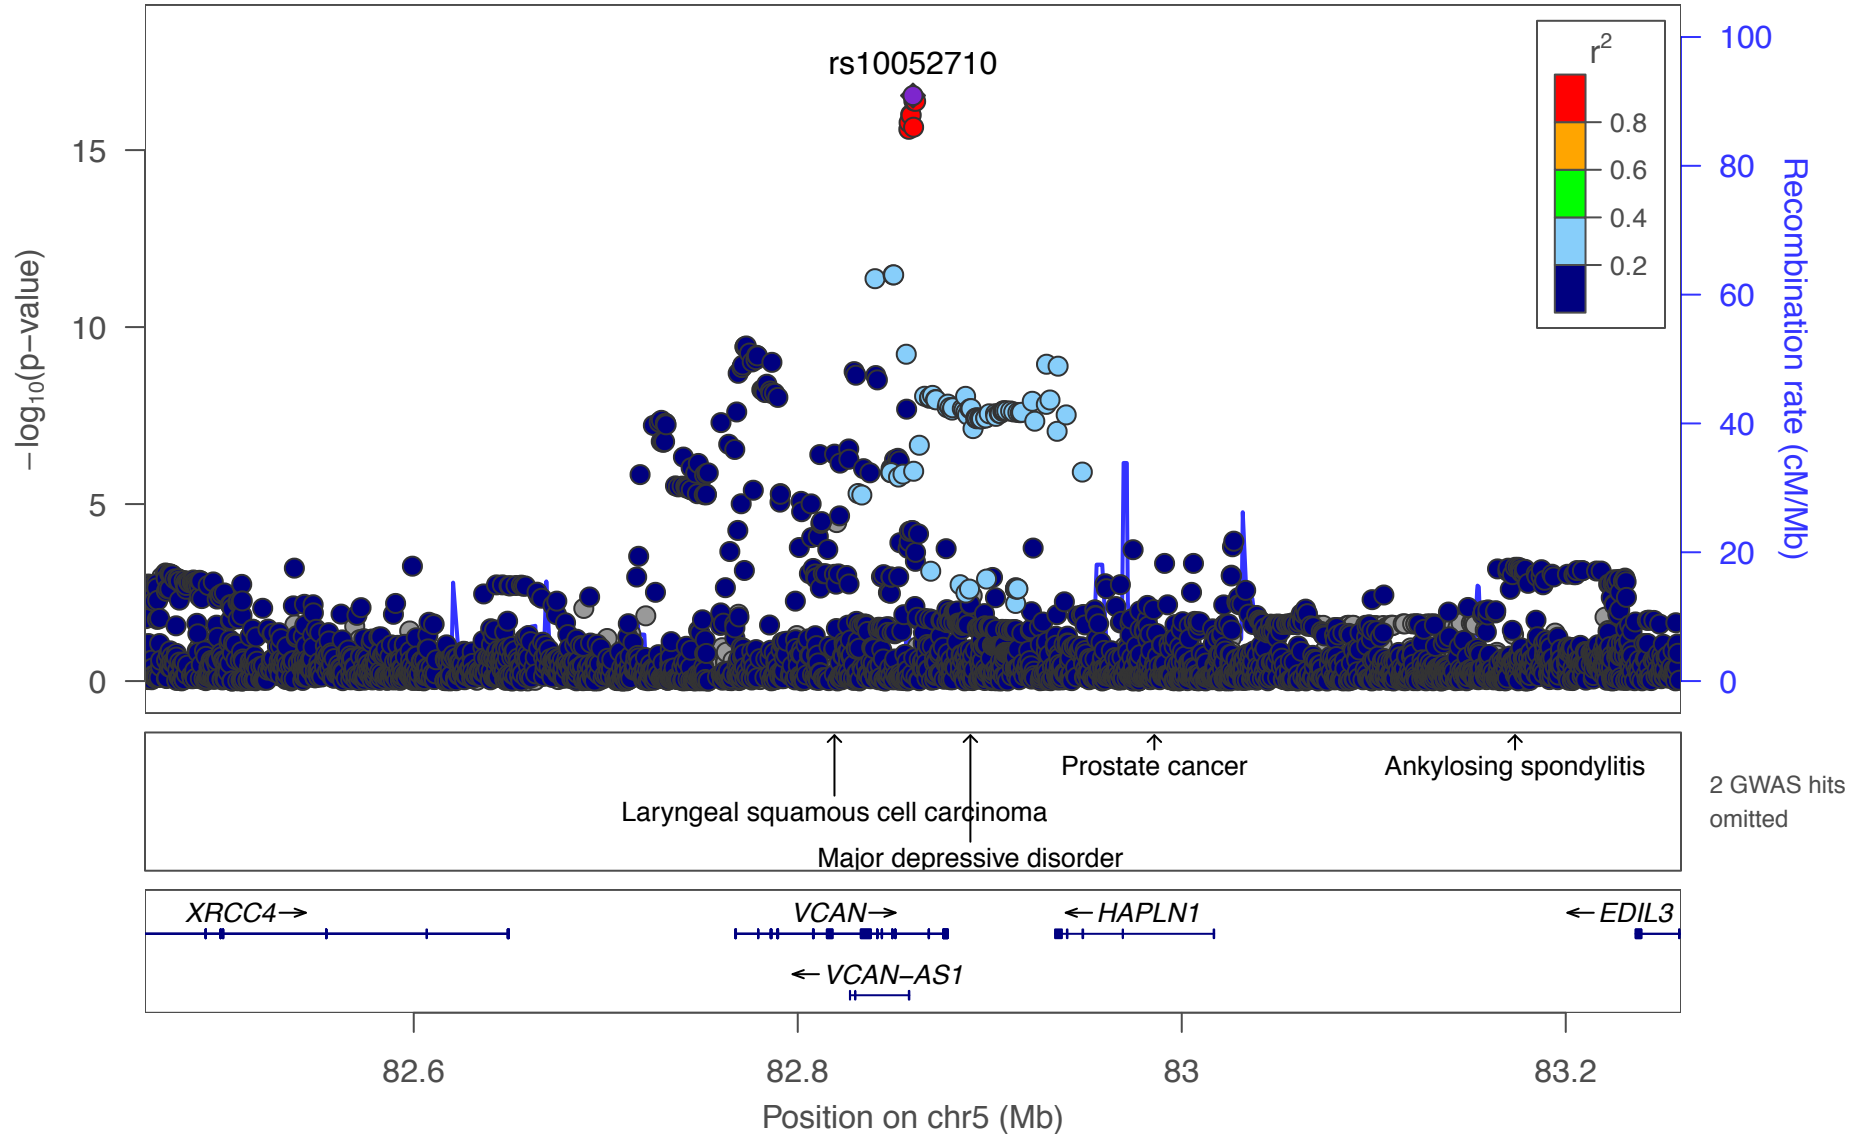



date: Thu Aug 17 17:52:01 2017

build: hg19

display range: chr5:82460025–83260025 [82460025–83260025]

hilite range: 0 – 0 [ 0 – 0 ]

reference SNP: chr5:82860025

number of SNPs plotted: 3392

min P.value: 2.88E–17 [chr5:82860025]

max P.value: 9.99E–1 [chr5:82845489]

omitted GWAS Hits: NA, NA

## GWAS Catalog SNPs in Region

| <b>chr</b> | <b>pos (Mb)</b> | <b>trait</b>                      | <b>snp</b> |
|------------|-----------------|-----------------------------------|------------|
| 5          | 82.81912        | Laryngeal squamous cell carcinoma | rs310518   |
| 5          | 82.84549        | Diisocyanate-induced asthma       | rs3852186  |
| 5          | 82.88991        | Major depressive disorder         | rs310501   |
| 5          | 82.96073        | Visceral fat                      | rs3846635  |
| 5          | 82.98574        | Prostate cancer                   | rs4466137  |
| 5          | 83.17359        | Ankylosing spondylitis            | rs4552569  |

# ProtrackX\_FA\_ilf\_I

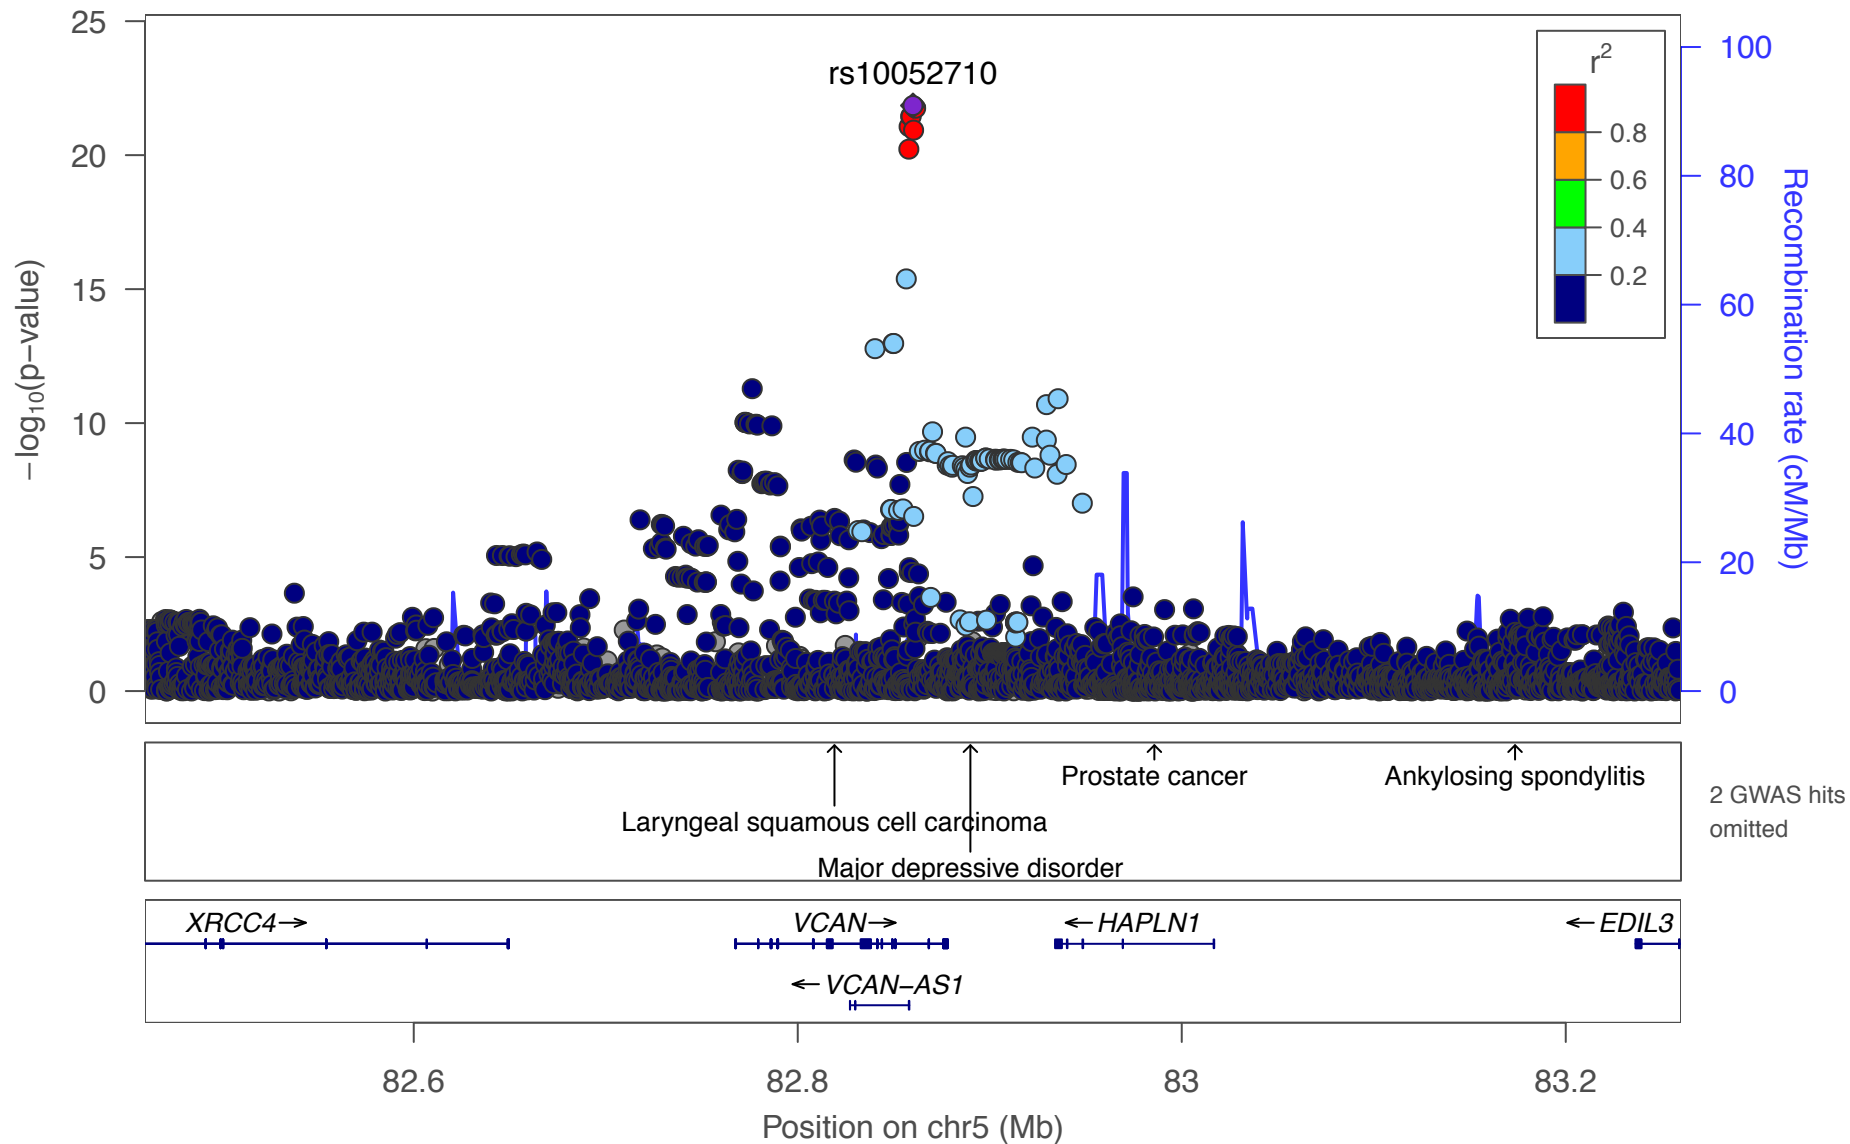

date: Thu Aug 17 17:52:01 2017

build: hg19

display range: chr5:82460025–83260025 [82460025–83260025]

hilite range: 0 – 0 [ 0 – 0 ]

reference SNP: chr5:82860025

number of SNPs plotted: 3392

min P.value: 1.41E–22 [chr5:82860025]

max P.value: 10E–1 [chr5:83158123]

omitted GWAS Hits: NA, NA

## GWAS Catalog SNPs in Region

| <b>chr</b> | <b>pos (Mb)</b> | <b>trait</b>                      | <b>snp</b> |
|------------|-----------------|-----------------------------------|------------|
| 5          | 82.81912        | Laryngeal squamous cell carcinoma | rs310518   |
| 5          | 82.84549        | Diisocyanate-induced asthma       | rs3852186  |
| 5          | 82.88991        | Major depressive disorder         | rs310501   |
| 5          | 82.96073        | Visceral fat                      | rs3846635  |
| 5          | 82.98574        | Prostate cancer                   | rs4466137  |
| 5          | 83.17359        | Ankylosing spondylitis            | rs4552569  |

# ProtrackX\_FA\_ilf\_r

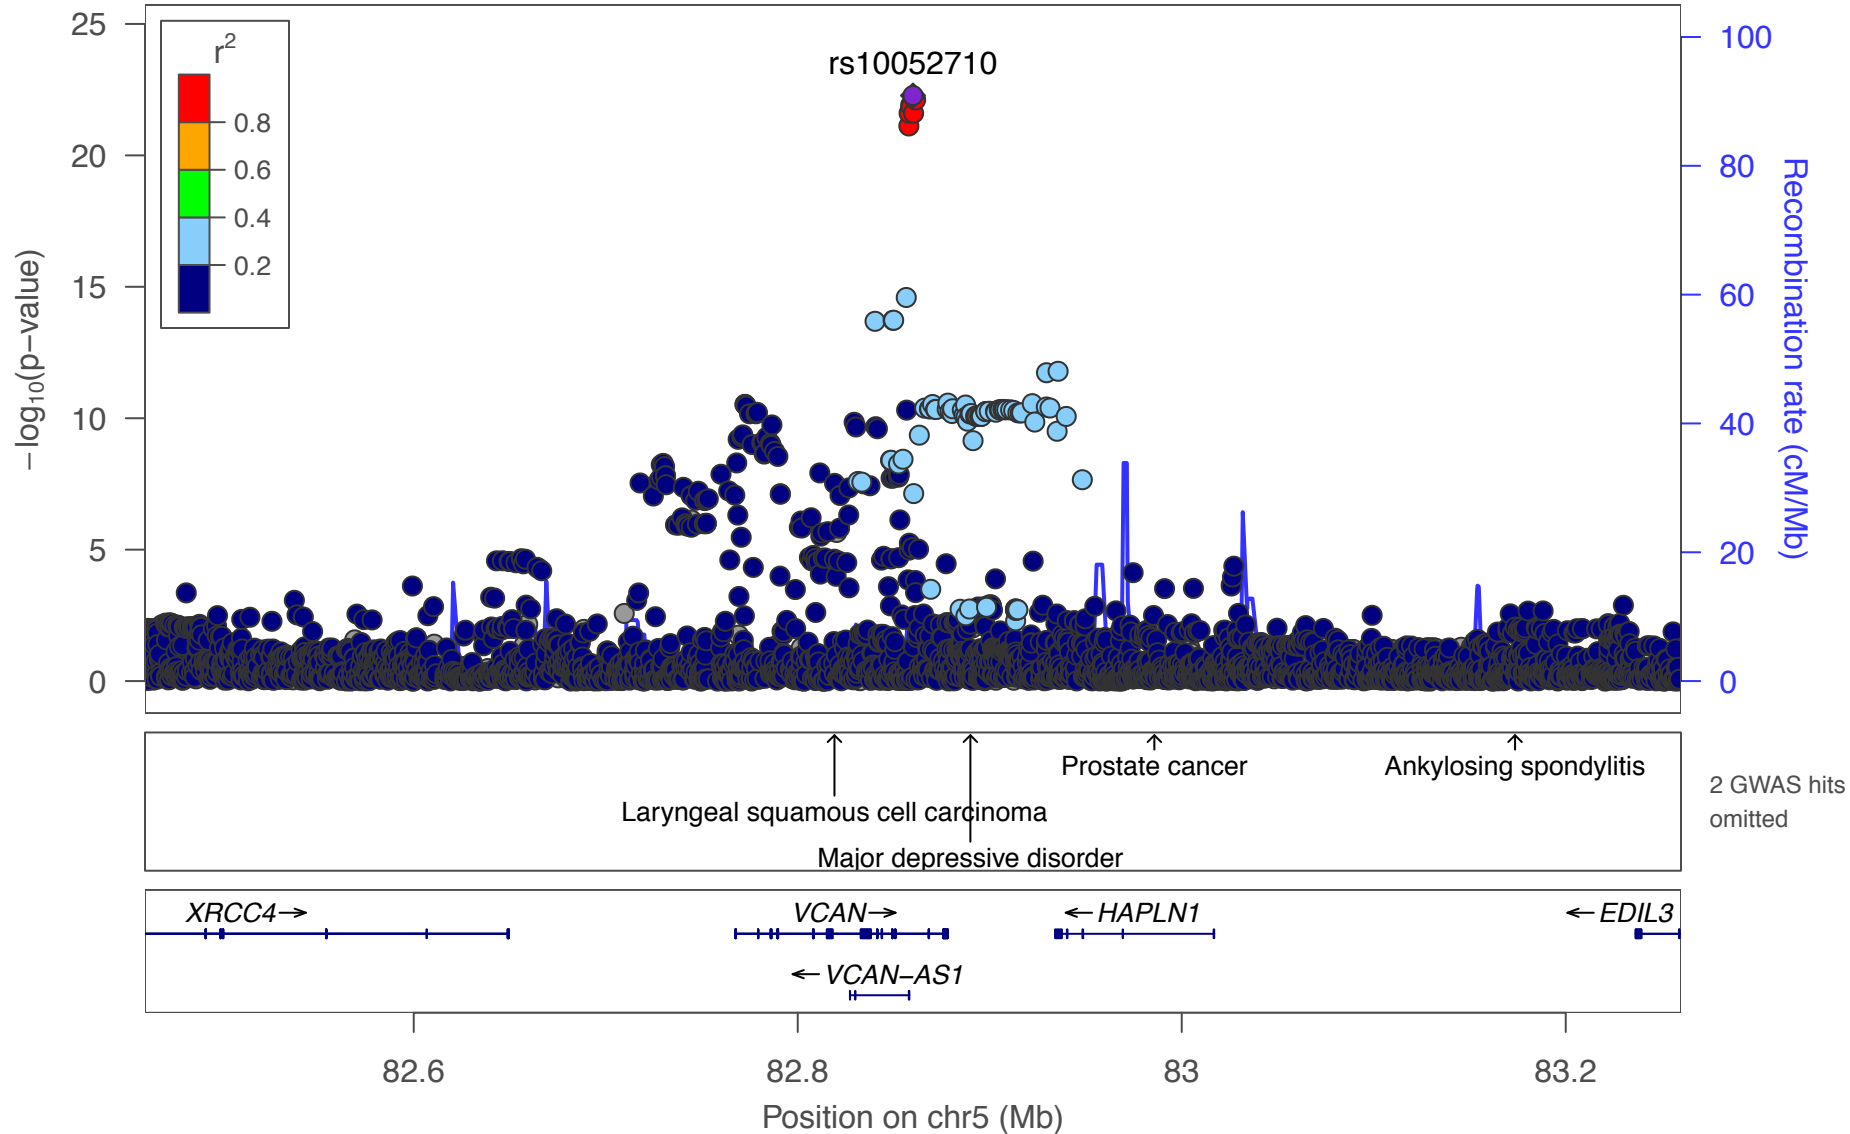

date: Thu Aug 17 17:52:01 2017

build: hg19

display range: chr5:82460025–83260025 [82460025–83260025]

hilite range: 0 – 0 [ 0 – 0 ]

reference SNP: chr5:82860025

number of SNPs plotted: 3392

min P.value: 5.3E–23 [chr5:82860025]

max P.value: 10E–1 [chr5:83162320]

omitted GWAS Hits: NA, NA

## GWAS Catalog SNPs in Region

| <b>chr</b> | <b>pos (Mb)</b> | <b>trait</b>                      | <b>snp</b> |
|------------|-----------------|-----------------------------------|------------|
| 5          | 82.81912        | Laryngeal squamous cell carcinoma | rs310518   |
| 5          | 82.84549        | Diisocyanate-induced asthma       | rs3852186  |
| 5          | 82.88991        | Major depressive disorder         | rs310501   |
| 5          | 82.96073        | Visceral fat                      | rs3846635  |
| 5          | 82.98574        | Prostate cancer                   | rs4466137  |
| 5          | 83.17359        | Ankylosing spondylitis            | rs4552569  |



# ProbtrackX\_FA\_slf\_I

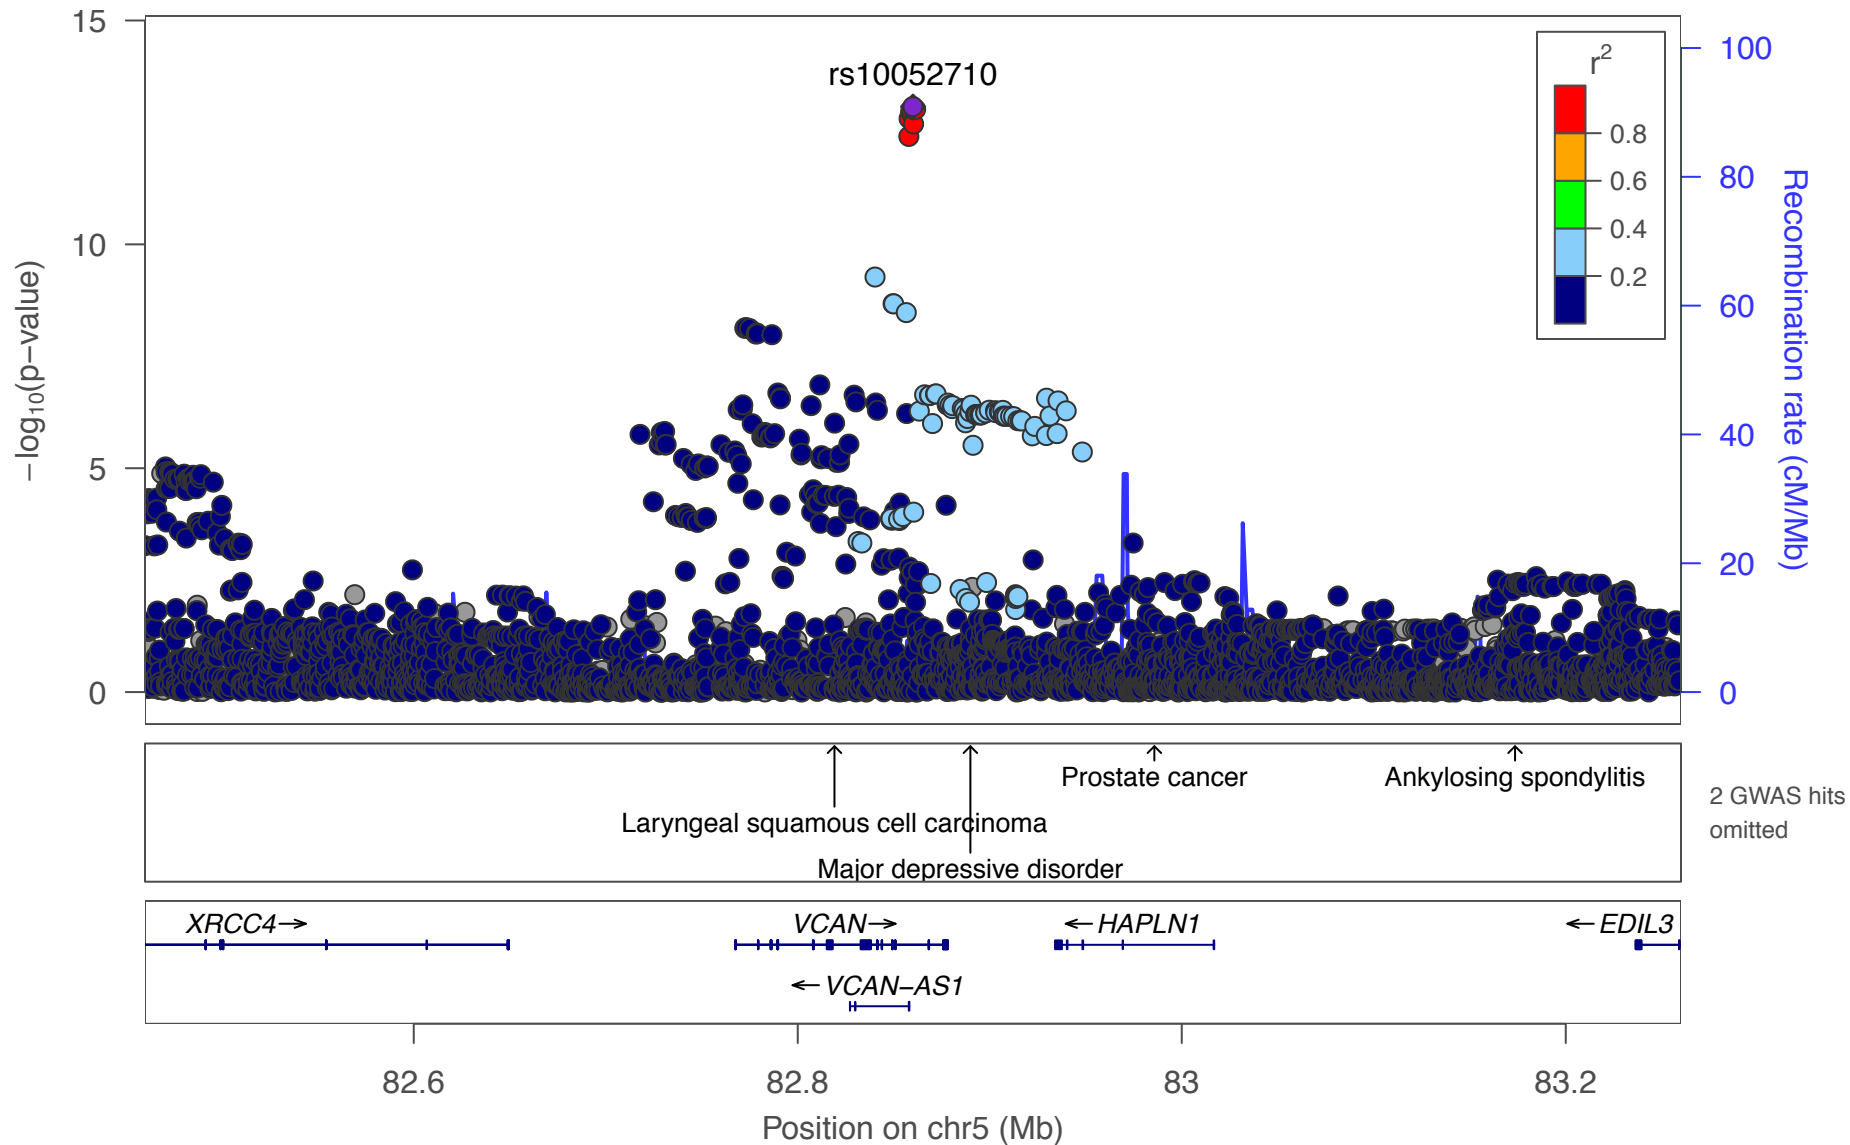

date: Thu Aug 17 17:52:01 2017

build: hg19

display range: chr5:82460025–83260025 [82460025–83260025]

hilite range: 0 – 0 [ 0 – 0 ]

reference SNP: chr5:82860025

number of SNPs plotted: 3392

min P.value: 8.36E–14 [chr5:82860025]

max P.value: 10E–1 [chr5:82857173]

omitted GWAS Hits: NA, NA

## GWAS Catalog SNPs in Region

| <b>chr</b> | <b>pos (Mb)</b> | <b>trait</b>                      | <b>snp</b> |
|------------|-----------------|-----------------------------------|------------|
| 5          | 82.81912        | Laryngeal squamous cell carcinoma | rs310518   |
| 5          | 82.84549        | Diisocyanate-induced asthma       | rs3852186  |
| 5          | 82.88991        | Major depressive disorder         | rs310501   |
| 5          | 82.96073        | Visceral fat                      | rs3846635  |
| 5          | 82.98574        | Prostate cancer                   | rs4466137  |
| 5          | 83.17359        | Ankylosing spondylitis            | rs4552569  |

# ProbtrackX\_FA\_slf\_r

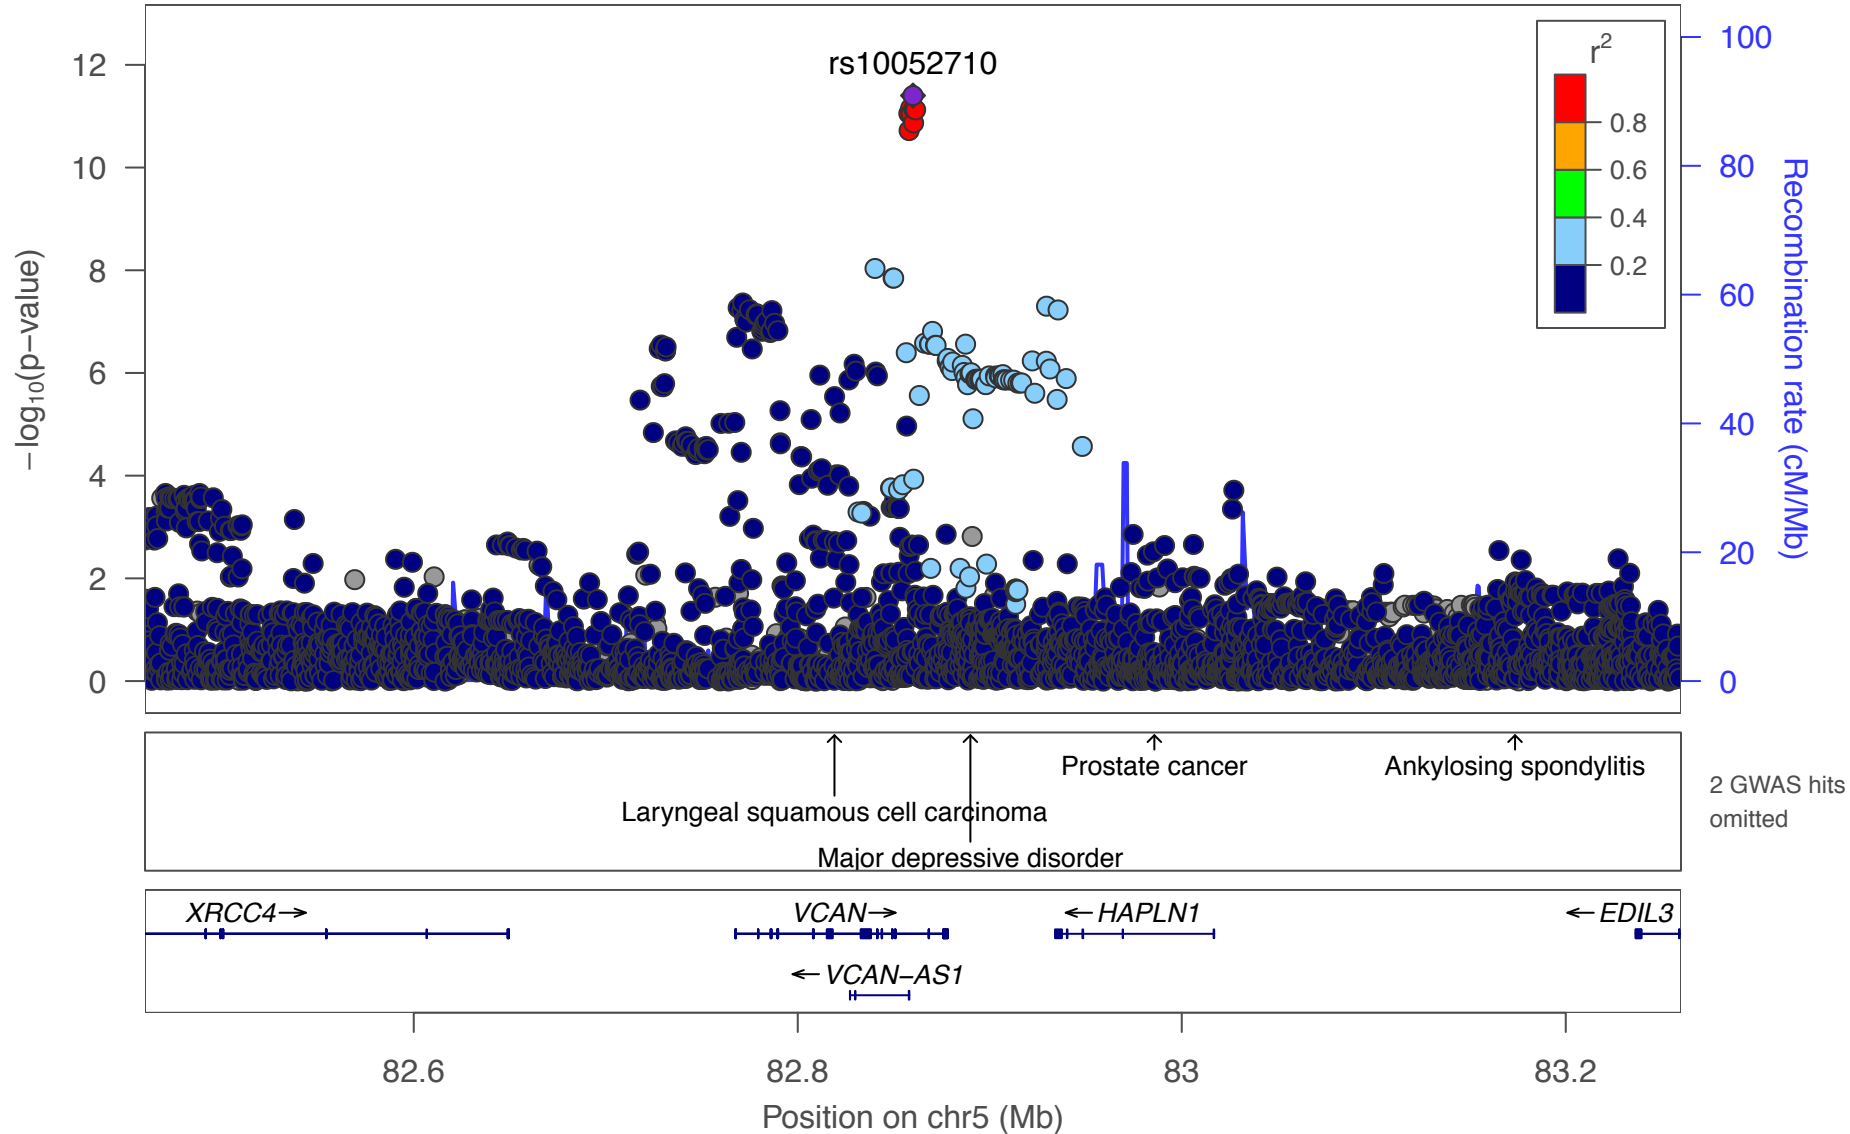

date: Thu Aug 17 17:52:01 2017

build: hg19

display range: chr5:82460025–83260025 [82460025–83260025]

hilite range: 0 – 0 [ 0 – 0 ]

reference SNP: chr5:82860025

number of SNPs plotted: 3392

min P.value: 3.96E–12 [chr5:82860025]

max P.value: 10E–1 [chr5:82959109]

omitted GWAS Hits: NA, NA

## GWAS Catalog SNPs in Region

| <b>chr</b> | <b>pos (Mb)</b> | <b>trait</b>                      | <b>snp</b> |
|------------|-----------------|-----------------------------------|------------|
| 5          | 82.81912        | Laryngeal squamous cell carcinoma | rs310518   |
| 5          | 82.84549        | Diisocyanate-induced asthma       | rs3852186  |
| 5          | 82.88991        | Major depressive disorder         | rs310501   |
| 5          | 82.96073        | Visceral fat                      | rs3846635  |
| 5          | 82.98574        | Prostate cancer                   | rs4466137  |
| 5          | 83.17359        | Ankylosing spondylitis            | rs4552569  |

# ProbtrackX\_L3\_cgc\_I

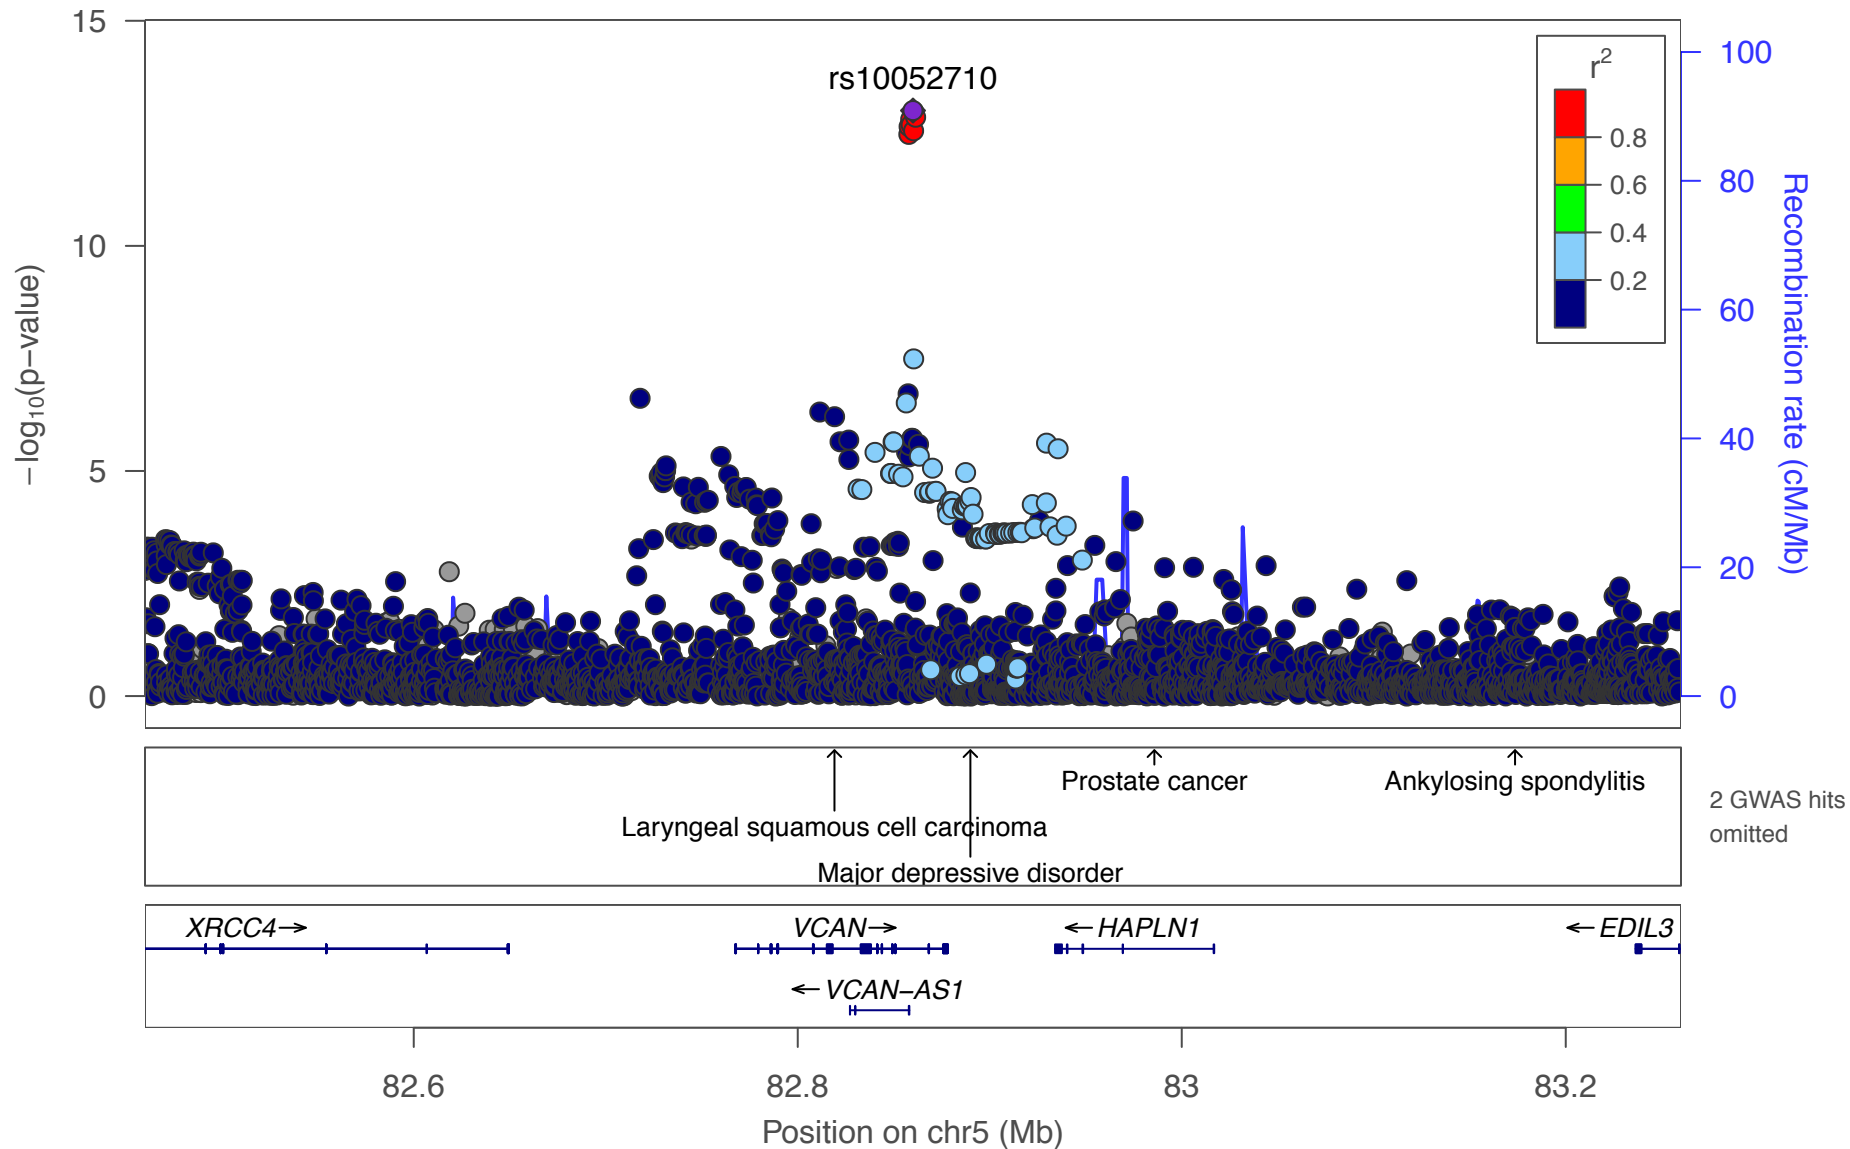

date: Thu Aug 17 17:52:01 2017

build: hg19

display range: chr5:82460025–83260025 [82460025–83260025]

hilite range: 0 – 0 [ 0 – 0 ]

reference SNP: chr5:82860025

number of SNPs plotted: 3392

min P.value: 9.86E–14 [chr5:82860025]

max P.value: 10E–1 [chr5:82990933]

omitted GWAS Hits: NA, NA



## GWAS Catalog SNPs in Region

| <b>chr</b> | <b>pos (Mb)</b> | <b>trait</b>                      | <b>snp</b> |
|------------|-----------------|-----------------------------------|------------|
| 5          | 82.81912        | Laryngeal squamous cell carcinoma | rs310518   |
| 5          | 82.84549        | Diisocyanate-induced asthma       | rs3852186  |
| 5          | 82.88991        | Major depressive disorder         | rs310501   |
| 5          | 82.96073        | Visceral fat                      | rs3846635  |
| 5          | 82.98574        | Prostate cancer                   | rs4466137  |
| 5          | 83.17359        | Ankylosing spondylitis            | rs4552569  |

# ProbtrackX\_L3\_cgc\_r

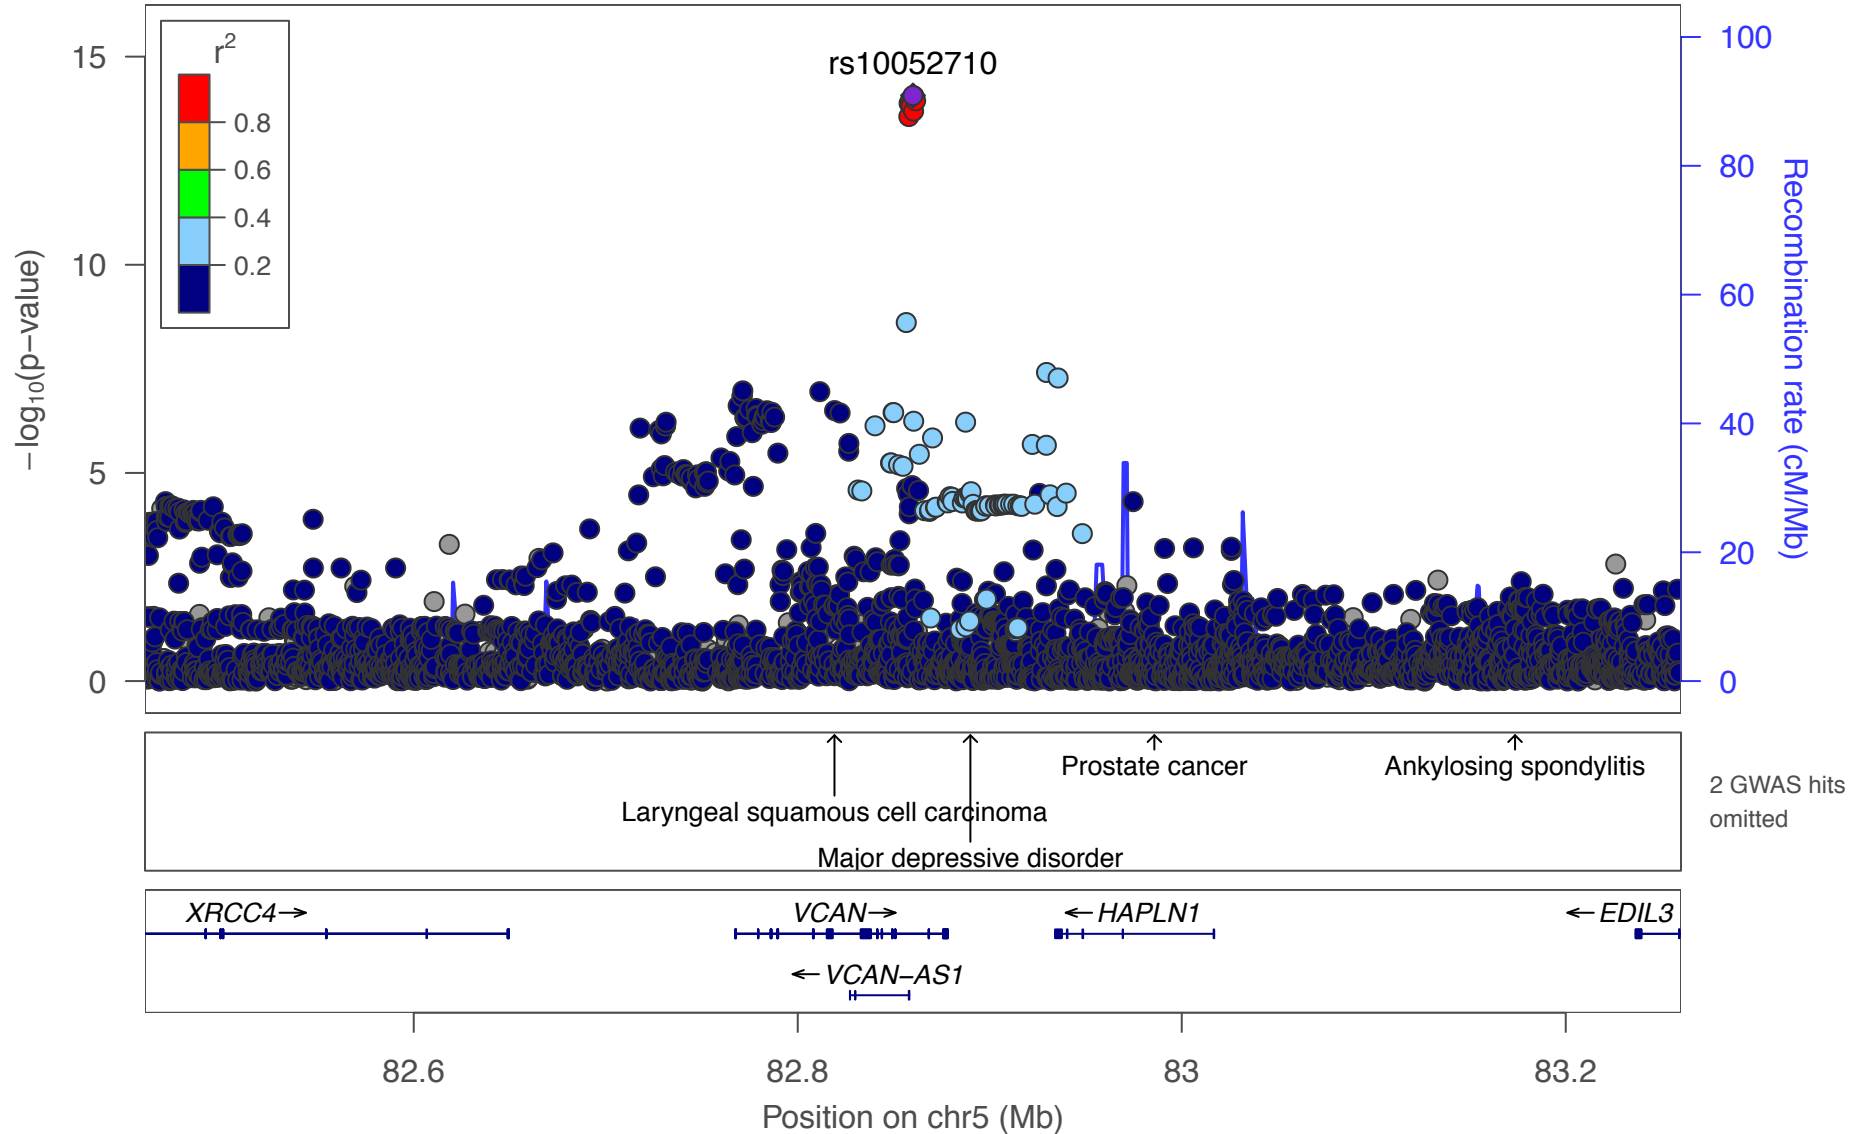

date: Thu Aug 17 17:52:01 2017

build: hg19

display range: chr5:82460025–83260025 [82460025–83260025]

hilite range: 0 – 0 [ 0 – 0 ]

reference SNP: chr5:82860025

number of SNPs plotted: 3392

min P.value: 8.61E–15 [chr5:82860025]

max P.value: 9.99E–1 [chr5:82750346]

omitted GWAS Hits: NA, NA

## GWAS Catalog SNPs in Region

| <b>chr</b> | <b>pos (Mb)</b> | <b>trait</b>                      | <b>snp</b> |
|------------|-----------------|-----------------------------------|------------|
| 5          | 82.81912        | Laryngeal squamous cell carcinoma | rs310518   |
| 5          | 82.84549        | Diisocyanate-induced asthma       | rs3852186  |
| 5          | 82.88991        | Major depressive disorder         | rs310501   |
| 5          | 82.96073        | Visceral fat                      | rs3846635  |
| 5          | 82.98574        | Prostate cancer                   | rs4466137  |
| 5          | 83.17359        | Ankylosing spondylitis            | rs4552569  |

# ProbtrackX\_ICVF\_fma

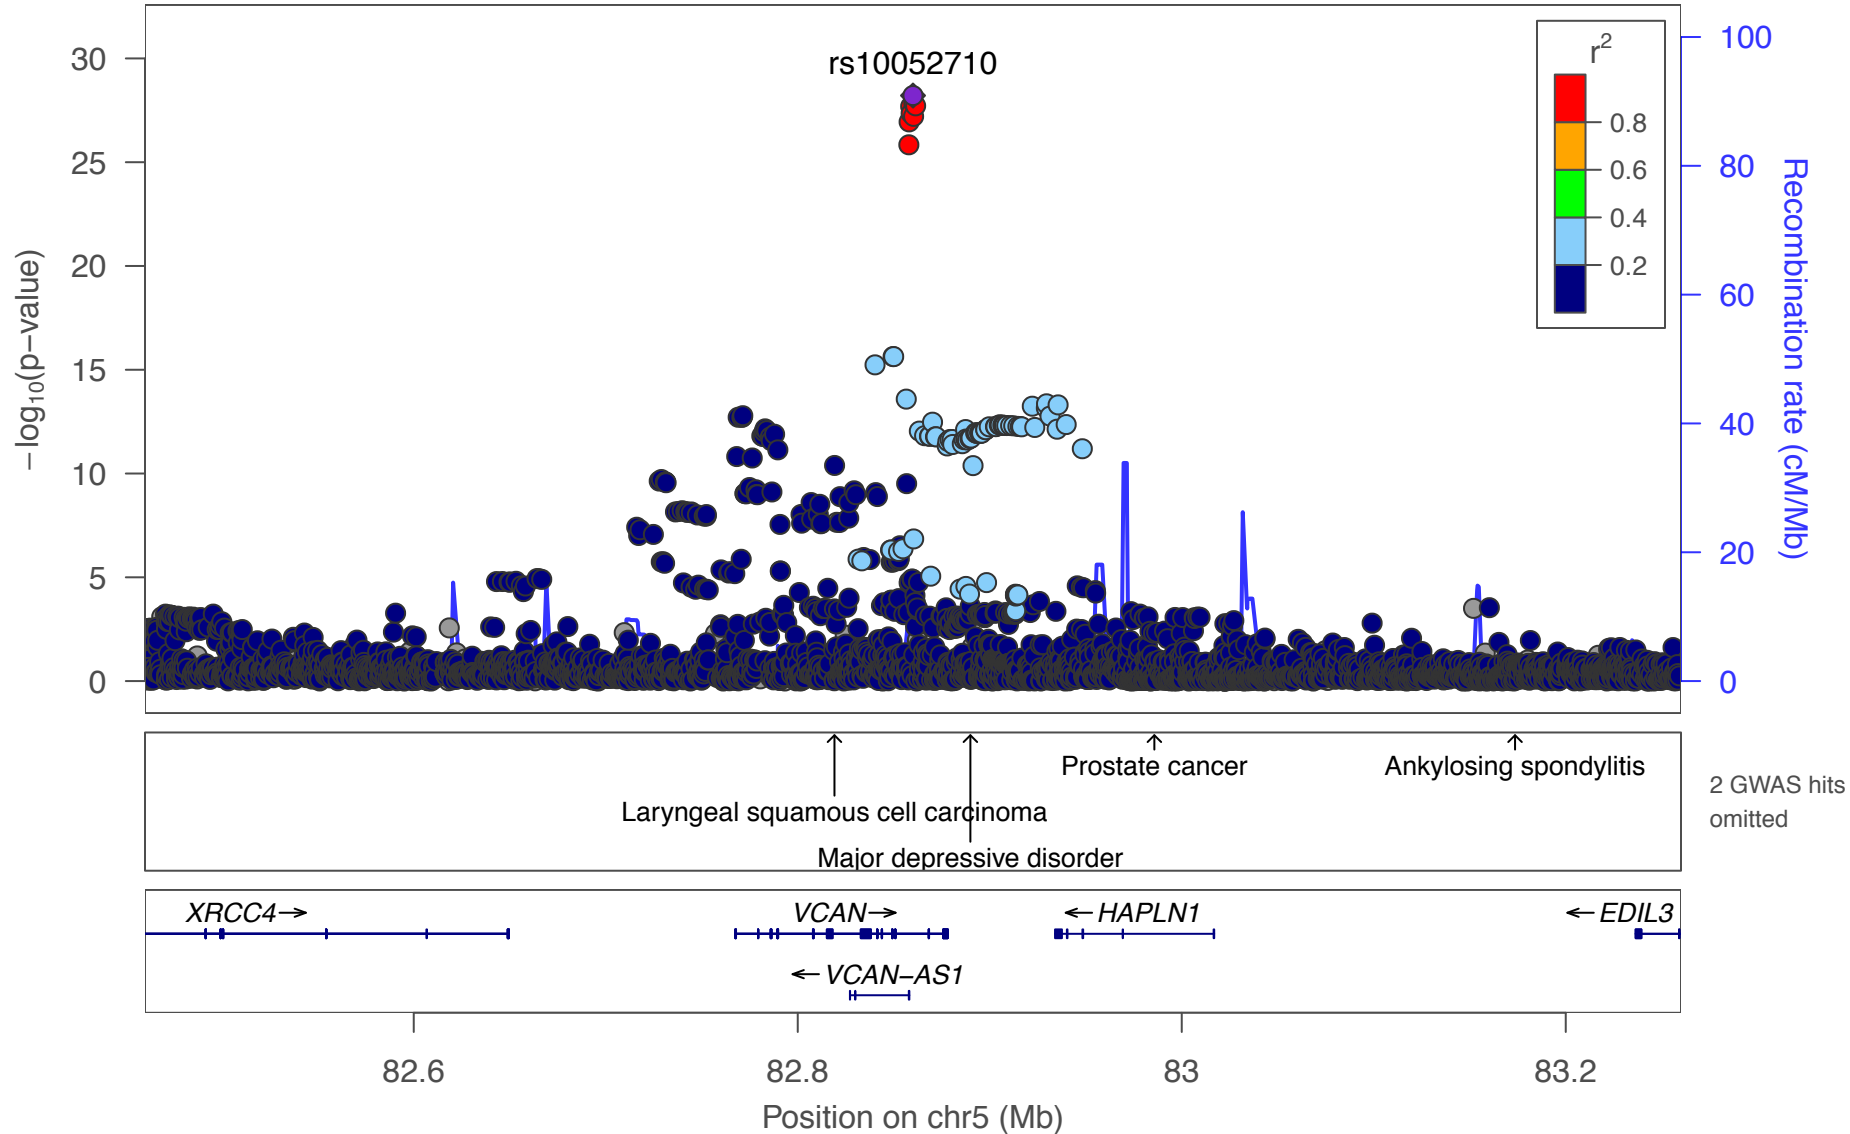

date: Thu Aug 17 17:52:01 2017

build: hg19

display range: chr5:82460025–83260025 [82460025–83260025]

hilite range: 0 – 0 [ 0 – 0 ]

reference SNP: chr5:82860025

number of SNPs plotted: 3392

min P.value: 6.15E–29 [chr5:82860025]

max P.value: 9.99E–1 [chr5:82973987]

omitted GWAS Hits: NA, NA

## GWAS Catalog SNPs in Region

| <b>chr</b> | <b>pos (Mb)</b> | <b>trait</b>                      | <b>snp</b> |
|------------|-----------------|-----------------------------------|------------|
| 5          | 82.81912        | Laryngeal squamous cell carcinoma | rs310518   |
| 5          | 82.84549        | Diisocyanate-induced asthma       | rs3852186  |
| 5          | 82.88991        | Major depressive disorder         | rs310501   |
| 5          | 82.96073        | Visceral fat                      | rs3846635  |
| 5          | 82.98574        | Prostate cancer                   | rs4466137  |
| 5          | 83.17359        | Ankylosing spondylitis            | rs4552569  |

# ProbtrackX\_ICVF\_mcp

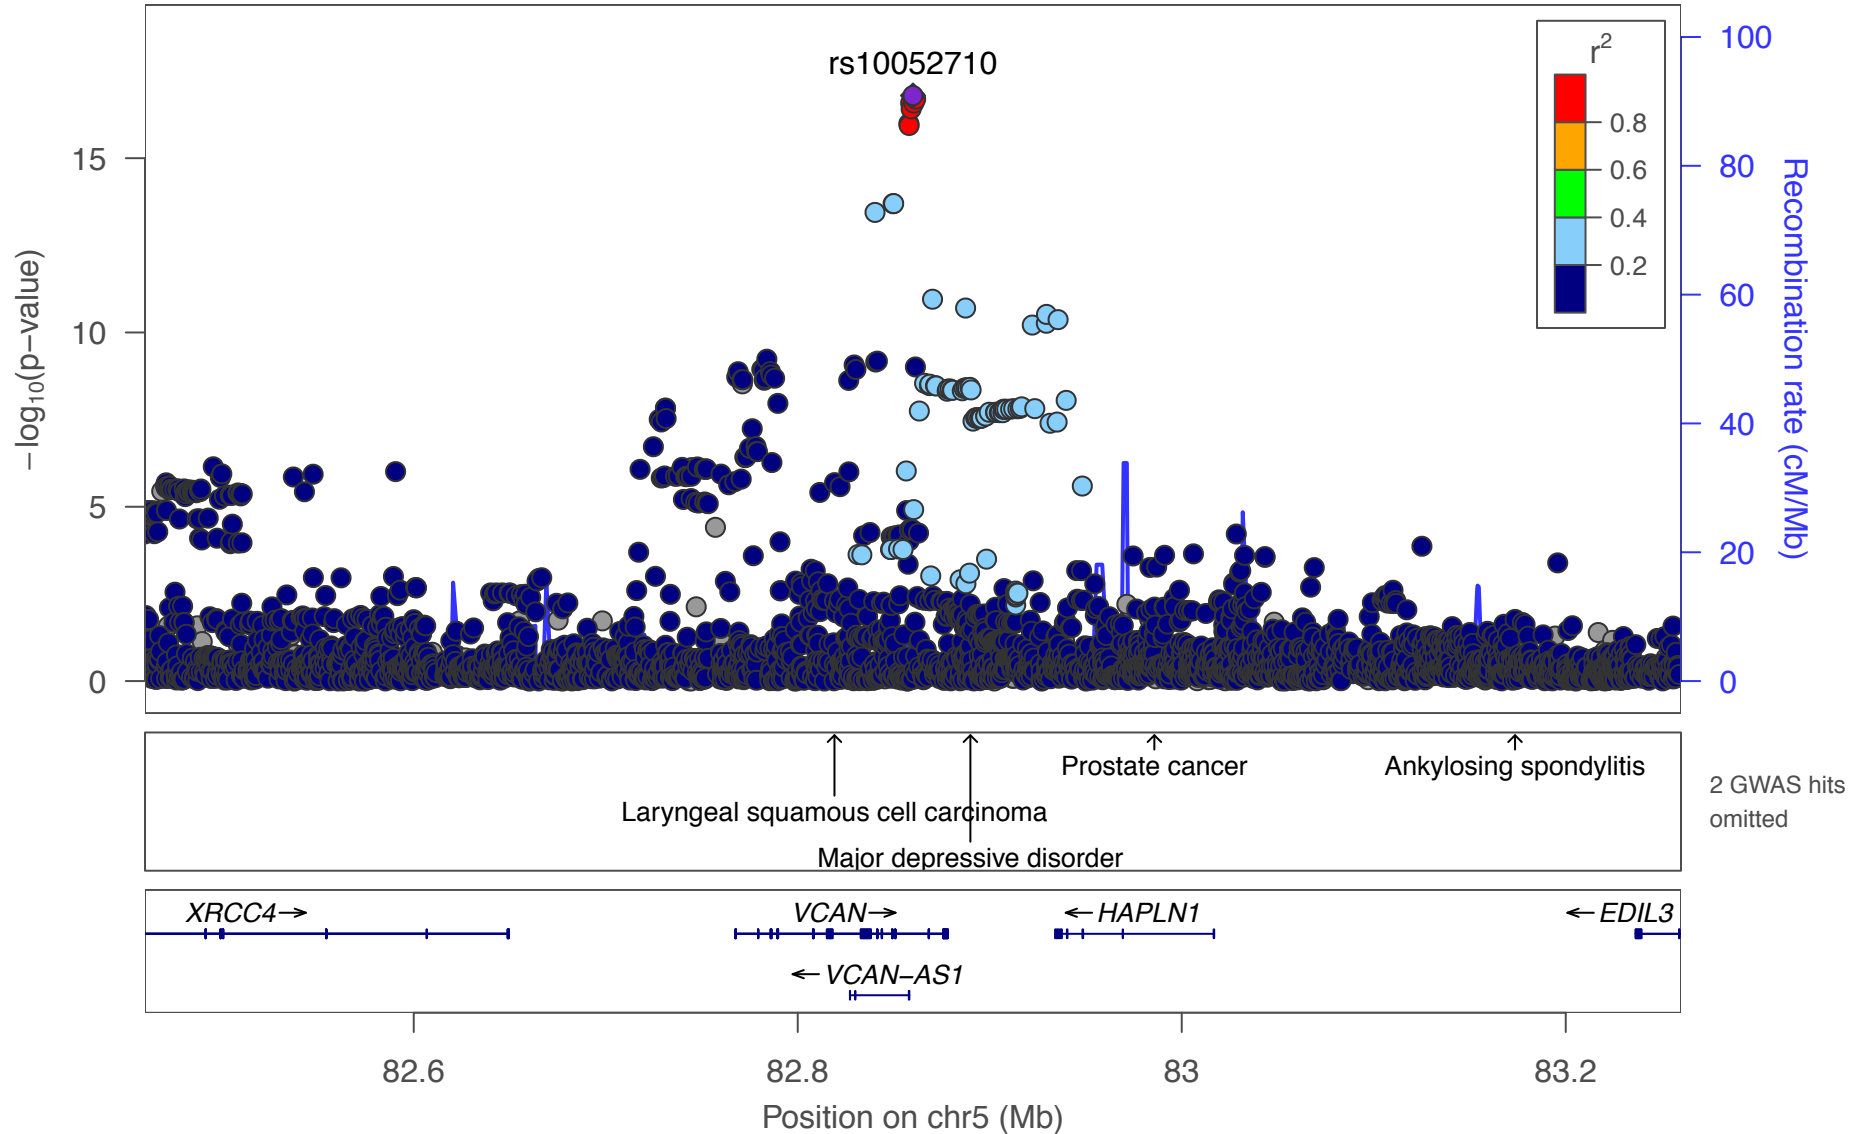



date: Thu Aug 17 17:52:01 2017

build: hg19

display range: chr5:82460025–83260025 [82460025–83260025]

hilite range: 0 – 0 [ 0 – 0 ]

reference SNP: chr5:82860025

number of SNPs plotted: 3392

min P.value: 1.6E–17 [chr5:82860025]

max P.value: 10E–1 [chr5:82574349]

omitted GWAS Hits: NA, NA

## GWAS Catalog SNPs in Region

| <b>chr</b> | <b>pos (Mb)</b> | <b>trait</b>                      | <b>snp</b> |
|------------|-----------------|-----------------------------------|------------|
| 5          | 82.81912        | Laryngeal squamous cell carcinoma | rs310518   |
| 5          | 82.84549        | Diisocyanate-induced asthma       | rs3852186  |
| 5          | 82.88991        | Major depressive disorder         | rs310501   |
| 5          | 82.96073        | Visceral fat                      | rs3846635  |
| 5          | 82.98574        | Prostate cancer                   | rs4466137  |
| 5          | 83.17359        | Ankylosing spondylitis            | rs4552569  |

# ProbtrackX\_ICVF\_ptr\_r

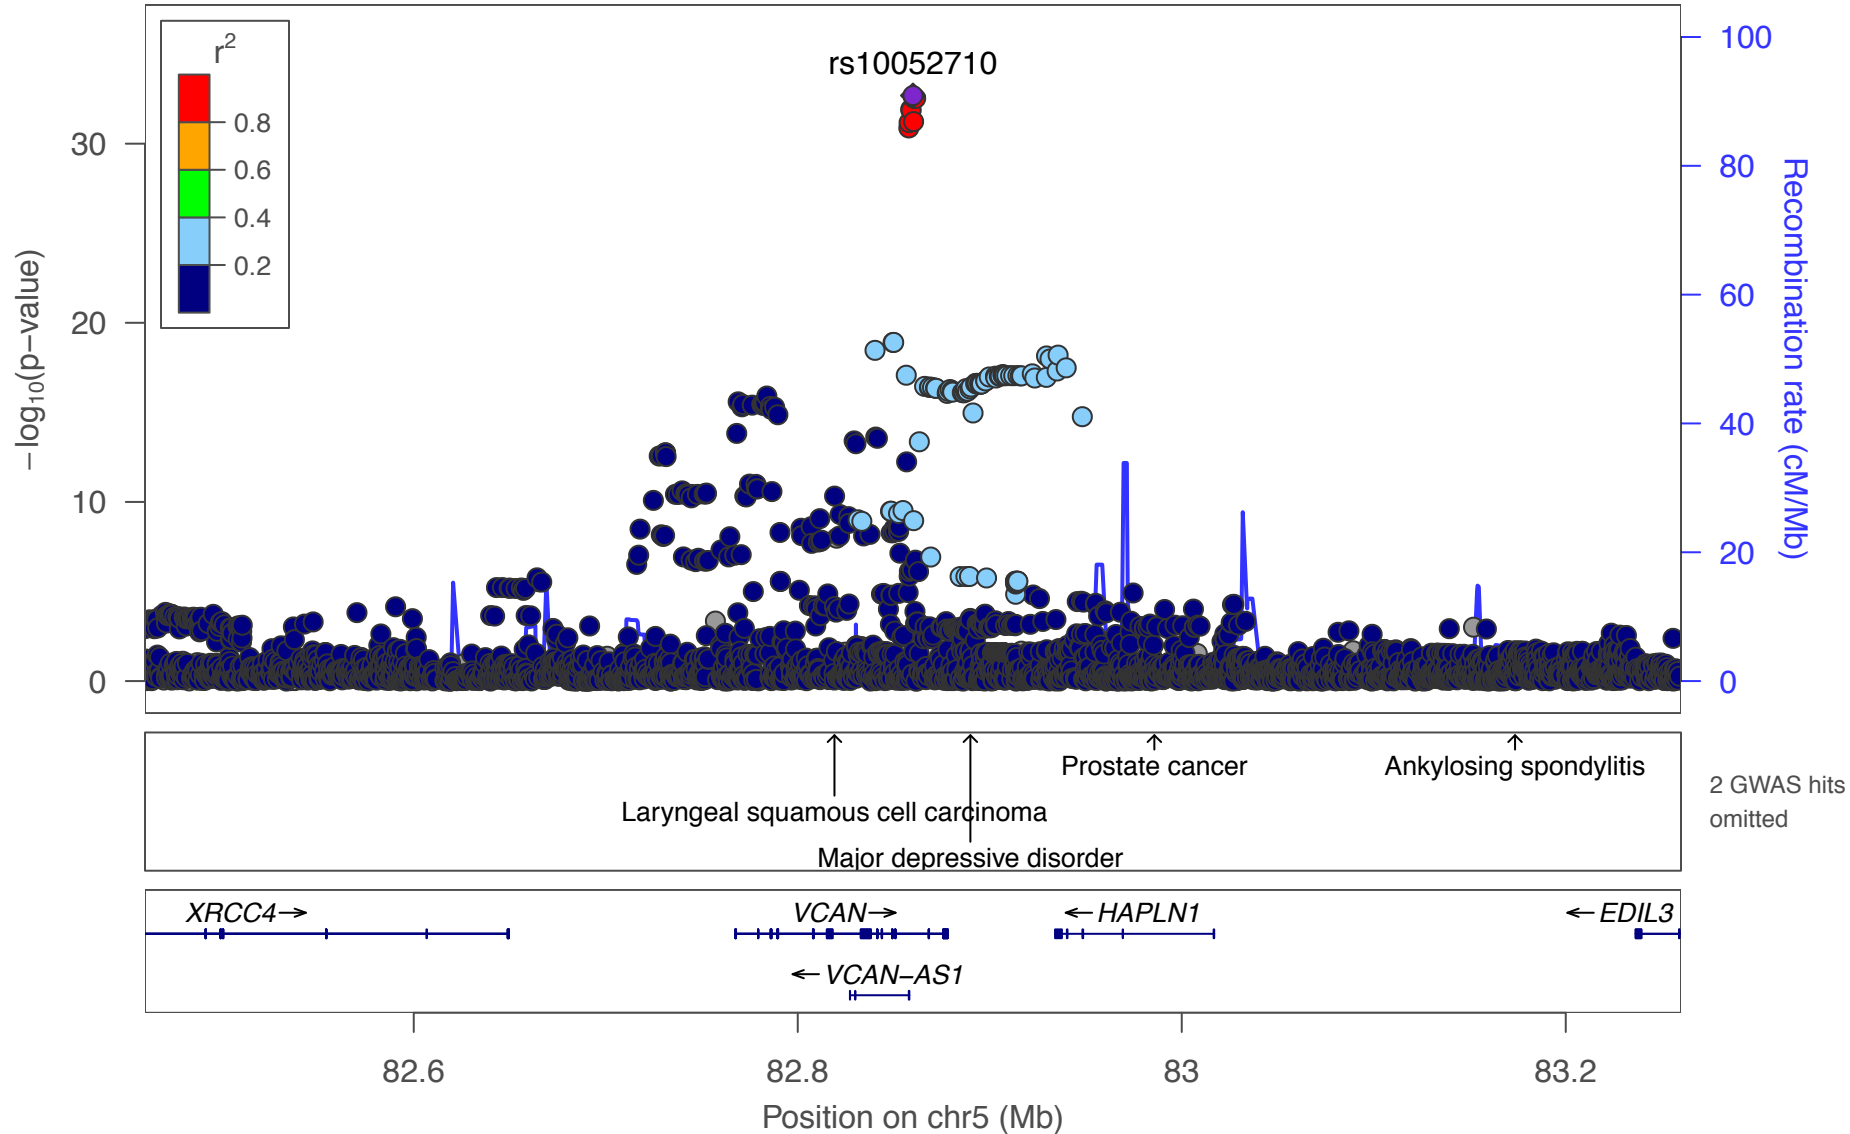

date: Thu Aug 17 17:52:01 2017

build: hg19

display range: chr5:82460025–83260025 [82460025–83260025]

hilite range: 0 – 0 [ 0 – 0 ]

reference SNP: chr5:82860025

number of SNPs plotted: 3392

min P.value: 2.06E–33 [chr5:82860025]

max P.value: 10E–1 [chr5:83098999]

omitted GWAS Hits: NA, NA

## GWAS Catalog SNPs in Region

| <b>chr</b> | <b>pos (Mb)</b> | <b>trait</b>                      | <b>snp</b> |
|------------|-----------------|-----------------------------------|------------|
| 5          | 82.81912        | Laryngeal squamous cell carcinoma | rs310518   |
| 5          | 82.84549        | Diisocyanate-induced asthma       | rs3852186  |
| 5          | 82.88991        | Major depressive disorder         | rs310501   |
| 5          | 82.96073        | Visceral fat                      | rs3846635  |
| 5          | 82.98574        | Prostate cancer                   | rs4466137  |
| 5          | 83.17359        | Ankylosing spondylitis            | rs4552569  |

# ProbtrackX\_ISOVF\_ifo\_r

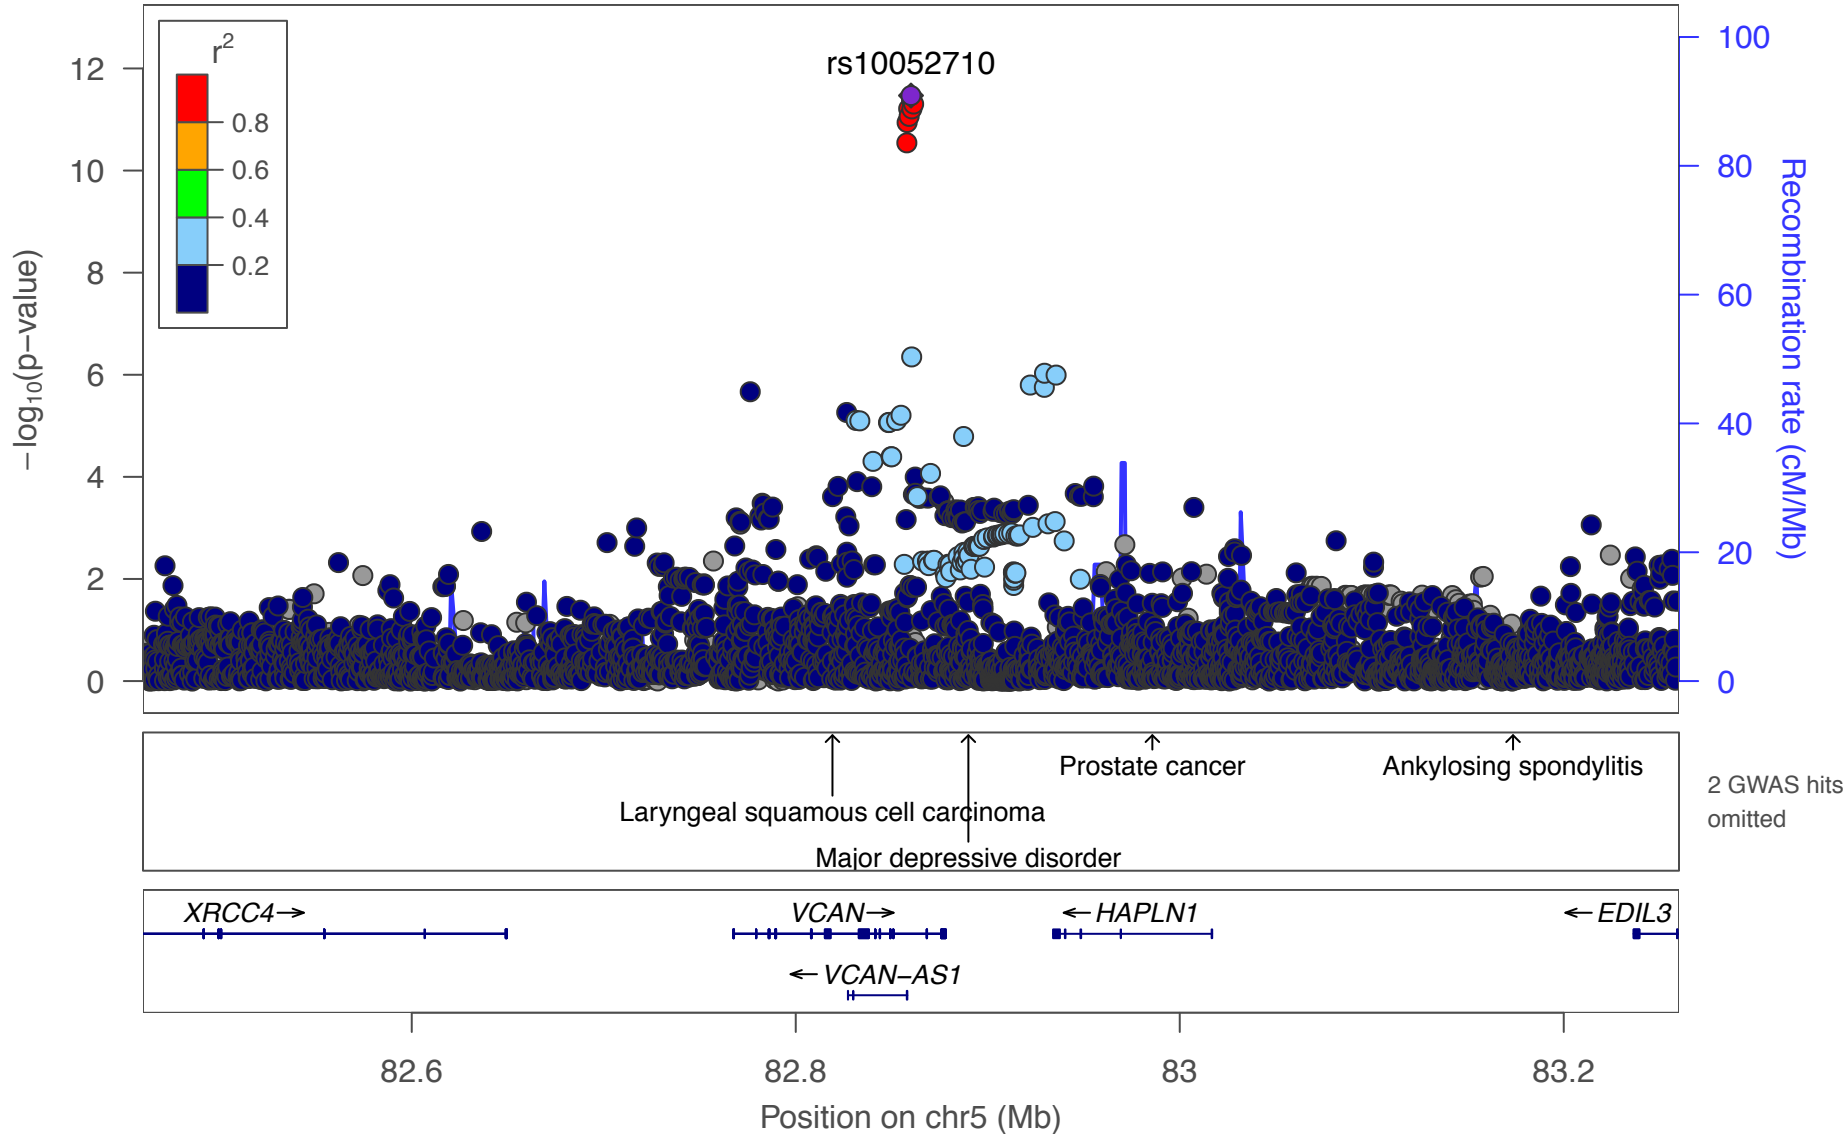

date: Thu Aug 17 17:52:01 2017

build: hg19

display range: chr5:82460025–83260025 [82460025–83260025]

hilite range: 0 – 0 [ 0 – 0 ]

reference SNP: chr5:82860025

number of SNPs plotted: 3392

min P.value: 3.4E–12 [chr5:82860025]

max P.value: 10E–1 [chr5:82463578]

omitted GWAS Hits: NA, NA

## GWAS Catalog SNPs in Region

| <b>chr</b> | <b>pos (Mb)</b> | <b>trait</b>                      | <b>snp</b> |
|------------|-----------------|-----------------------------------|------------|
| 5          | 82.81912        | Laryngeal squamous cell carcinoma | rs310518   |
| 5          | 82.84549        | Diisocyanate-induced asthma       | rs3852186  |
| 5          | 82.88991        | Major depressive disorder         | rs310501   |
| 5          | 82.96073        | Visceral fat                      | rs3846635  |
| 5          | 82.98574        | Prostate cancer                   | rs4466137  |
| 5          | 83.17359        | Ankylosing spondylitis            | rs4552569  |



# TBSS\_ICVF\_Inferior\_cerebellar\_peduncle\_R

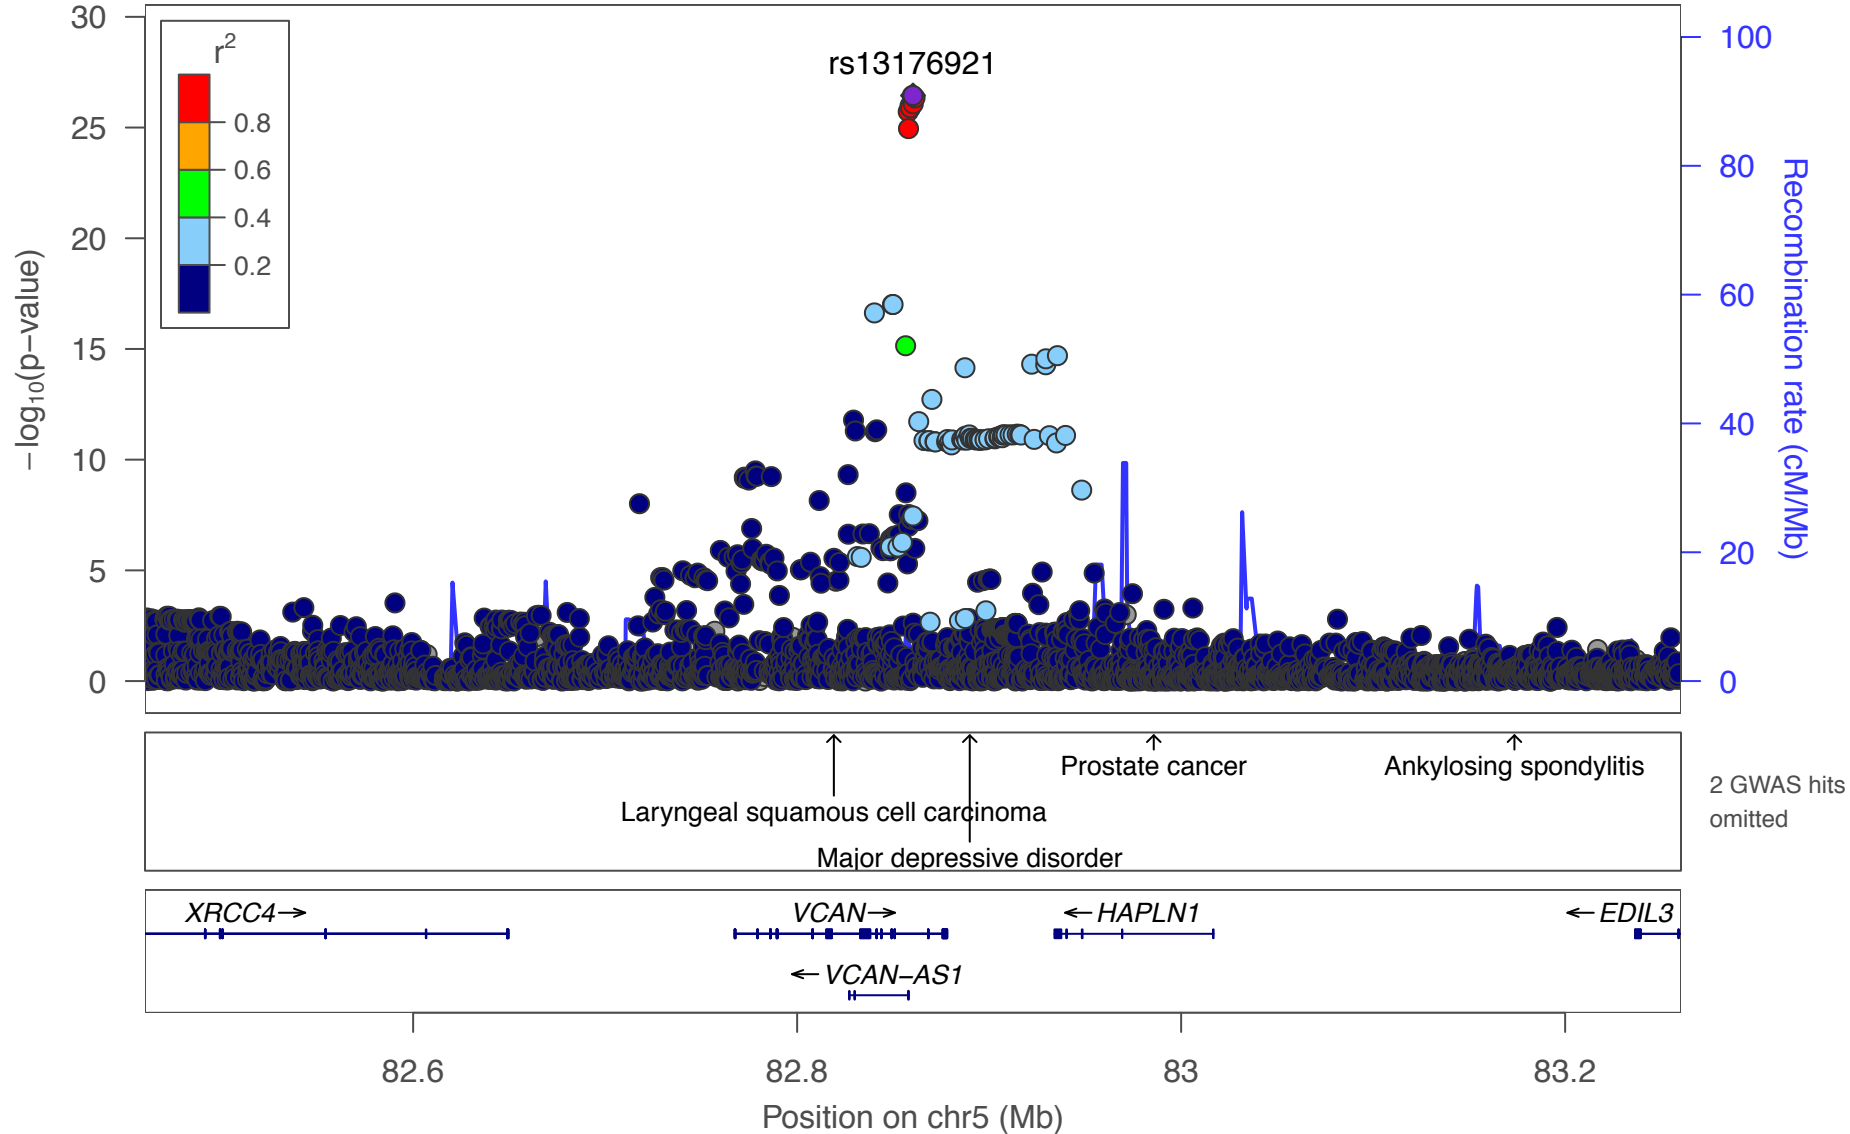

date: Thu Aug 17 17:52:01 2017

build: hg19

display range: chr5:82460348–83260348 [82460348–83260348]

hilite range: 0 – 0 [ 0 – 0 ]

reference SNP: chr5:82860348

number of SNPs plotted: 3392

min P.value: 3.59E–27 [chr5:82860025]

max P.value: 9.99E–1 [chr5:83023489]

omitted GWAS Hits: NA, NA

## GWAS Catalog SNPs in Region

| <b>chr</b> | <b>pos (Mb)</b> | <b>trait</b>                      | <b>snp</b> |
|------------|-----------------|-----------------------------------|------------|
| 5          | 82.81912        | Laryngeal squamous cell carcinoma | rs310518   |
| 5          | 82.84549        | Diisocyanate-induced asthma       | rs3852186  |
| 5          | 82.88991        | Major depressive disorder         | rs310501   |
| 5          | 82.96073        | Visceral fat                      | rs3846635  |
| 5          | 82.98574        | Prostate cancer                   | rs4466137  |
| 5          | 83.17359        | Ankylosing spondylitis            | rs4552569  |

# ProbtrackX\_ICVF\_ml\_I

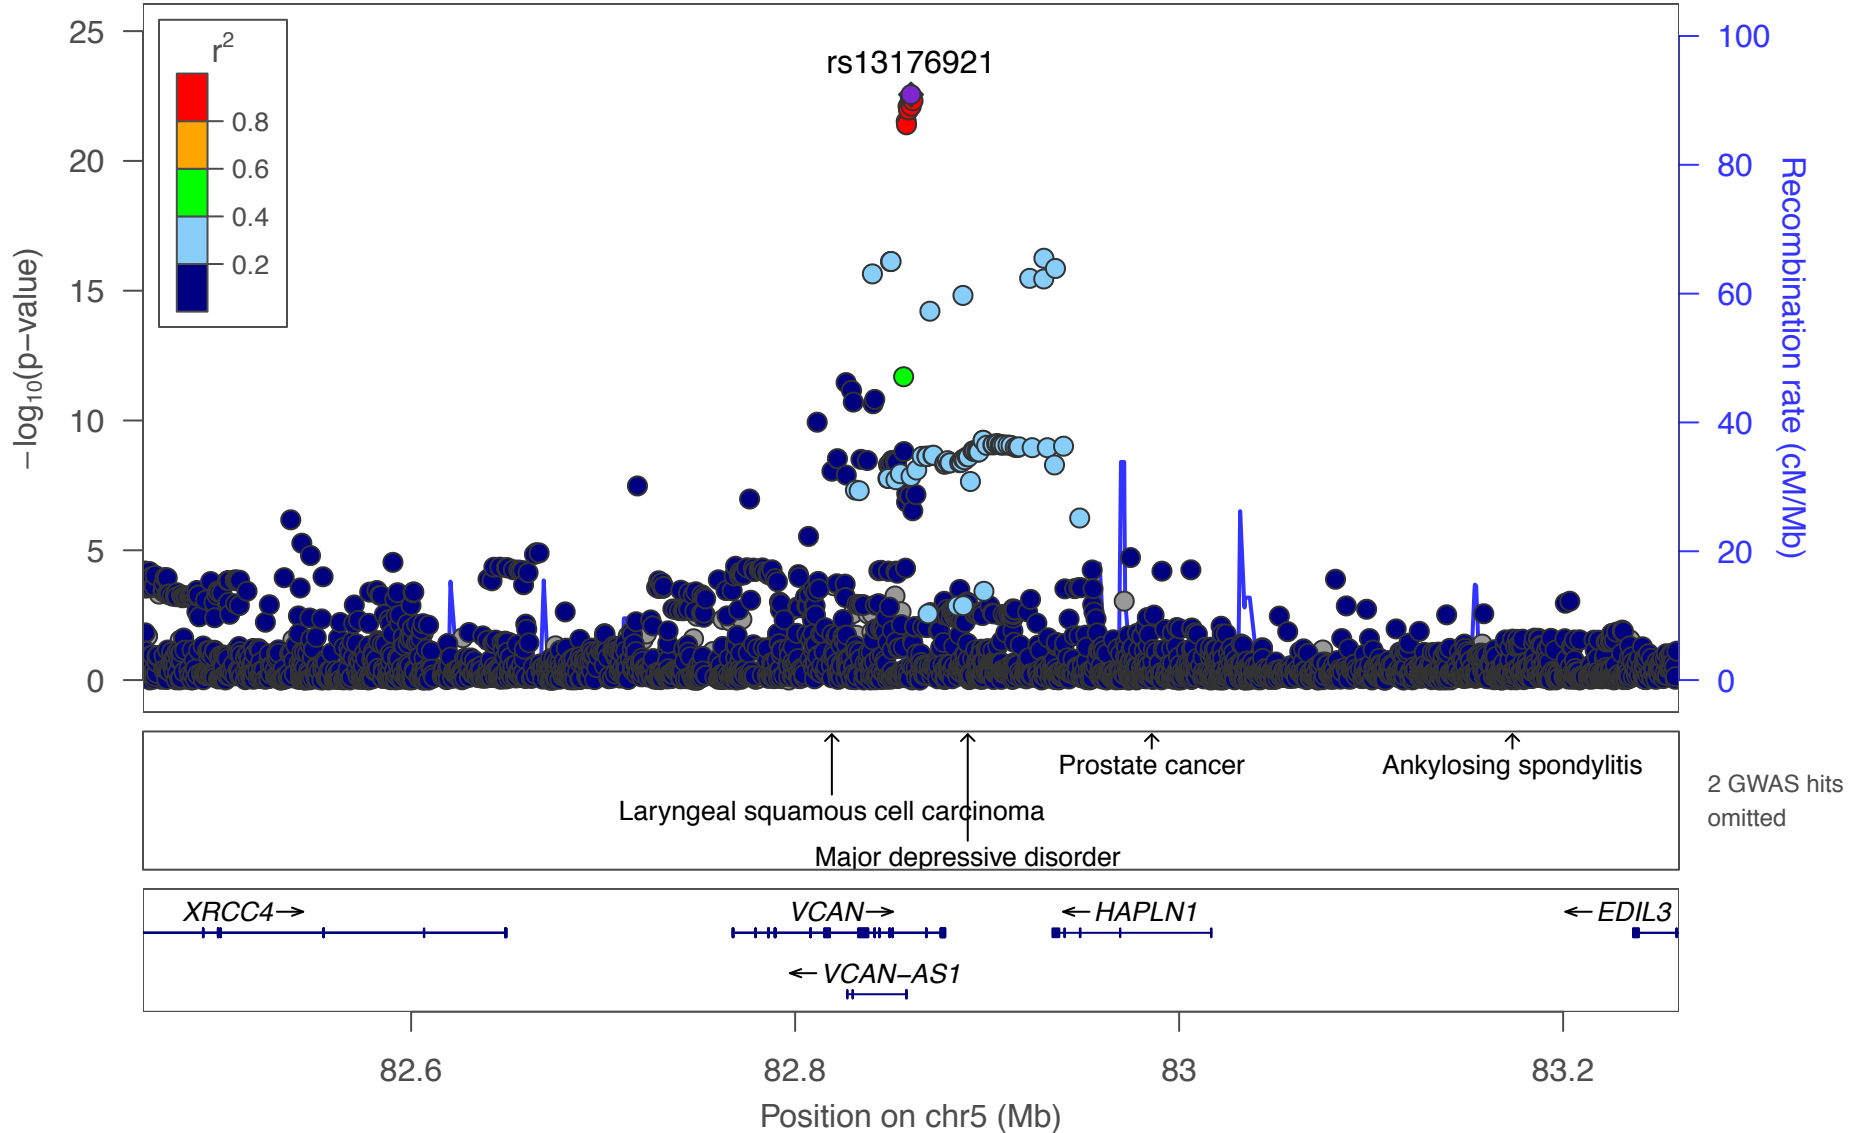

date: Thu Aug 17 17:52:01 2017

build: hg19

display range: chr5:82460348–83260348 [82460348–83260348]

hilite range: 0 – 0 [ 0 – 0 ]

reference SNP: chr5:82860348

number of SNPs plotted: 3392

min P.value: 2.77E–23 [chr5:82860348]

max P.value: 9.99E–1 [chr5:83193306]

omitted GWAS Hits: NA, NA

## GWAS Catalog SNPs in Region

| <b>chr</b> | <b>pos (Mb)</b> | <b>trait</b>                      | <b>snp</b> |
|------------|-----------------|-----------------------------------|------------|
| 5          | 82.81912        | Laryngeal squamous cell carcinoma | rs310518   |
| 5          | 82.84549        | Diisocyanate-induced asthma       | rs3852186  |
| 5          | 82.88991        | Major depressive disorder         | rs310501   |
| 5          | 82.96073        | Visceral fat                      | rs3846635  |
| 5          | 82.98574        | Prostate cancer                   | rs4466137  |
| 5          | 83.17359        | Ankylosing spondylitis            | rs4552569  |

# TBSS\_MD\_Posterior\_corona\_radiata\_R

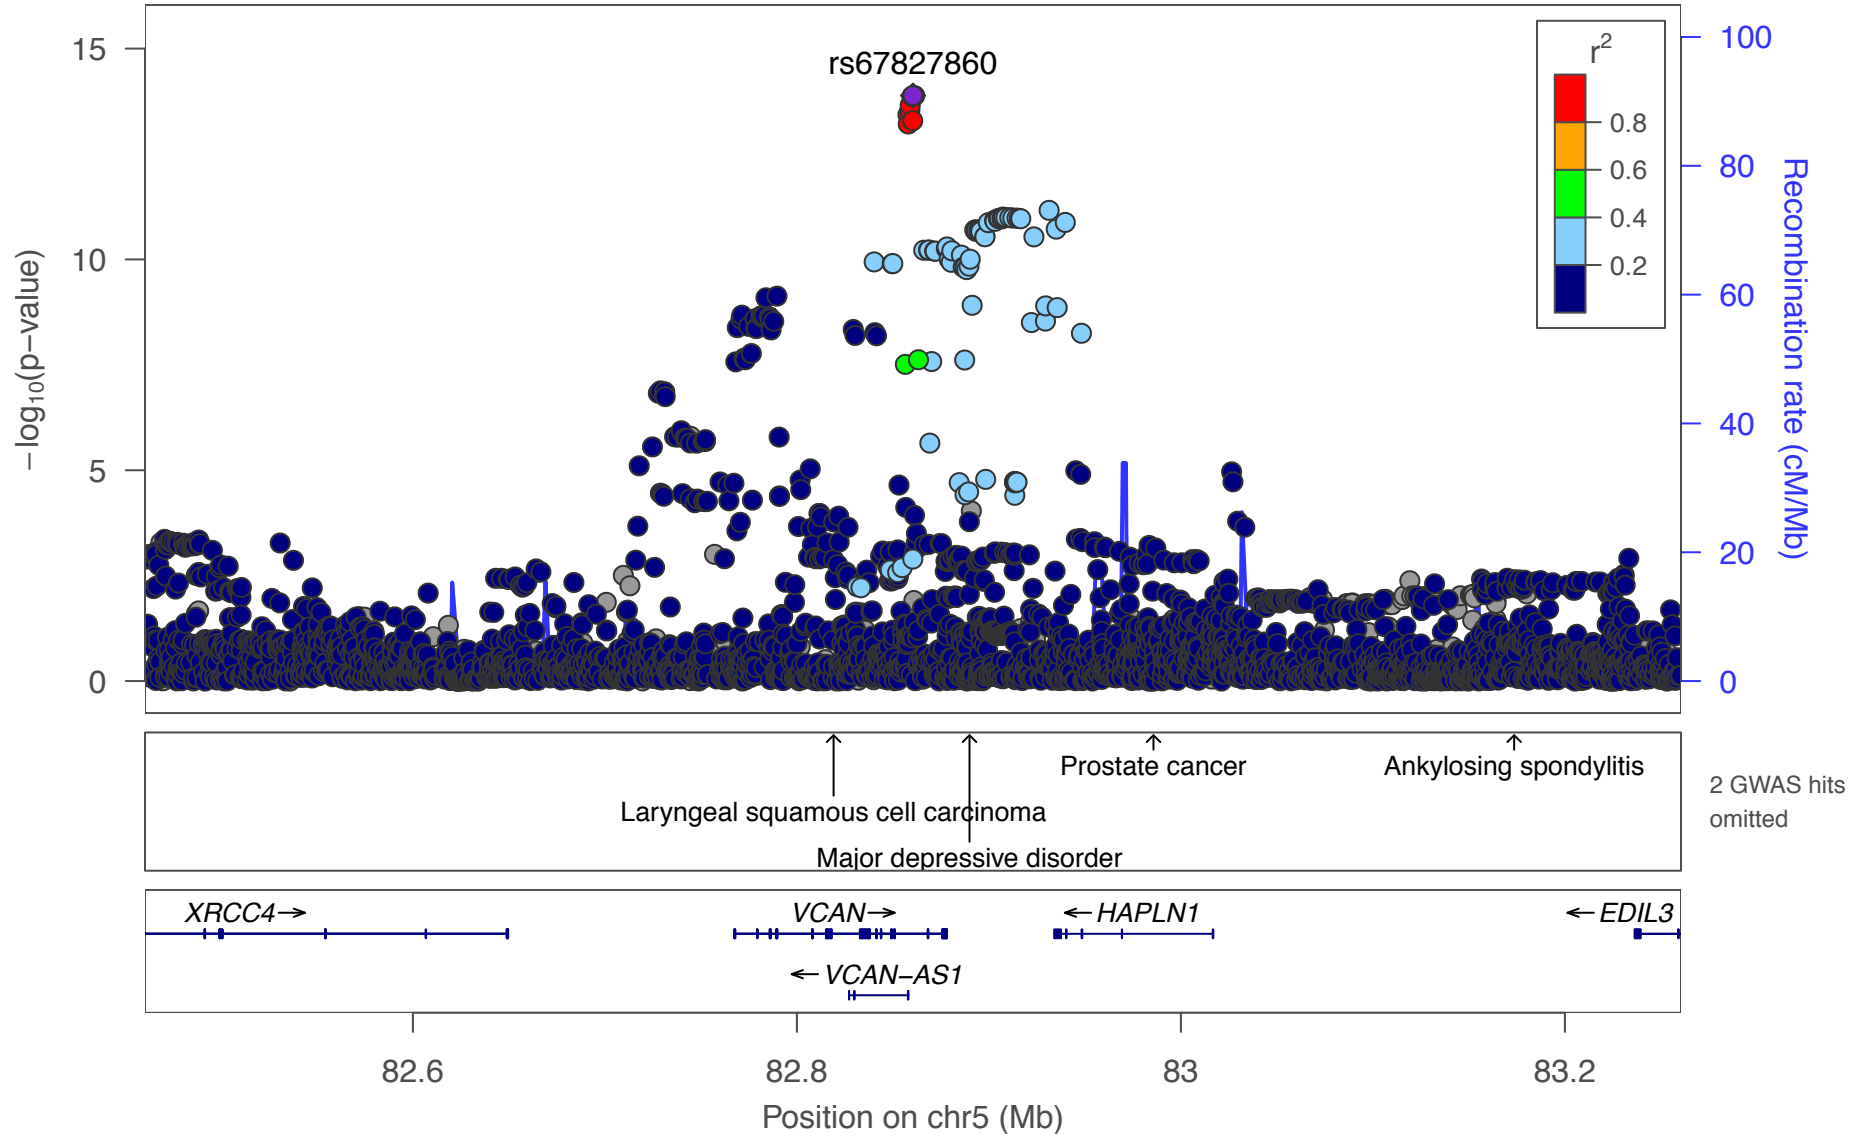

date: Thu Aug 17 17:52:01 2017

build: hg19

display range: chr5:82460485–83260485 [82460485–83260485]

hilite range: 0 – 0 [ 0 – 0 ]

reference SNP: chr5:82860485

number of SNPs plotted: 3393

min P.value: 1.3E–14 [chr5:82860485]

max P.value: 9.99E–1 [chr5:83098673]

omitted GWAS Hits: NA, NA



## GWAS Catalog SNPs in Region

| <b>chr</b> | <b>pos (Mb)</b> | <b>trait</b>                      | <b>snp</b> |
|------------|-----------------|-----------------------------------|------------|
| 5          | 82.81912        | Laryngeal squamous cell carcinoma | rs310518   |
| 5          | 82.84549        | Diisocyanate-induced asthma       | rs3852186  |
| 5          | 82.88991        | Major depressive disorder         | rs310501   |
| 5          | 82.96073        | Visceral fat                      | rs3846635  |
| 5          | 82.98574        | Prostate cancer                   | rs4466137  |
| 5          | 83.17359        | Ankylosing spondylitis            | rs4552569  |

# TBSS\_MD\_Posterior\_thalamic\_radiation\_L

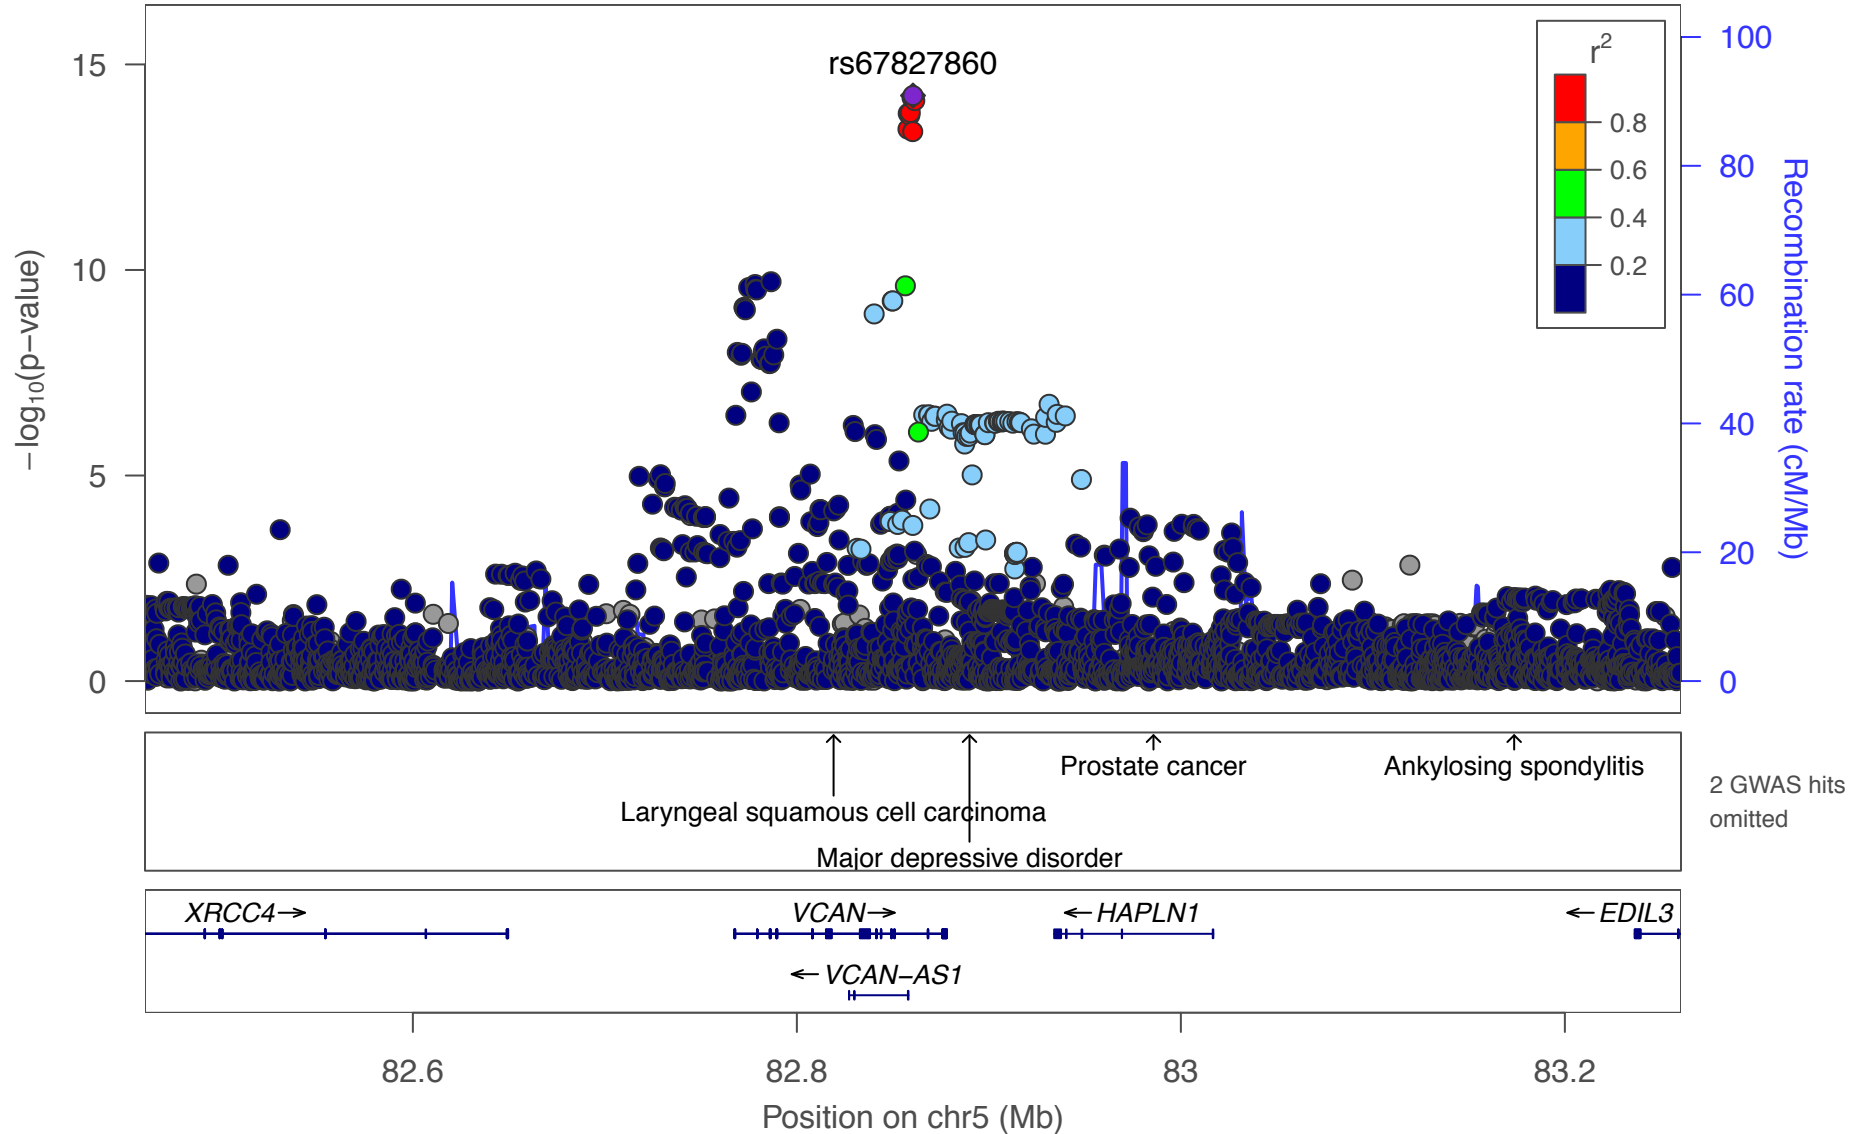

date: Thu Aug 17 17:52:01 2017

build: hg19

display range: chr5:82460485–83260485 [82460485–83260485]

hilite range: 0 – 0 [ 0 – 0 ]

reference SNP: chr5:82860485

number of SNPs plotted: 3393

min P.value: 5.71E–15 [chr5:82860485]

max P.value: 10E–1 [chr5:82936060]

omitted GWAS Hits: NA, NA

## GWAS Catalog SNPs in Region

| <b>chr</b> | <b>pos (Mb)</b> | <b>trait</b>                      | <b>snp</b> |
|------------|-----------------|-----------------------------------|------------|
| 5          | 82.81912        | Laryngeal squamous cell carcinoma | rs310518   |
| 5          | 82.84549        | Diisocyanate-induced asthma       | rs3852186  |
| 5          | 82.88991        | Major depressive disorder         | rs310501   |
| 5          | 82.96073        | Visceral fat                      | rs3846635  |
| 5          | 82.98574        | Prostate cancer                   | rs4466137  |
| 5          | 83.17359        | Ankylosing spondylitis            | rs4552569  |

# TBSS\_MD\_Sagittal\_stratum\_R

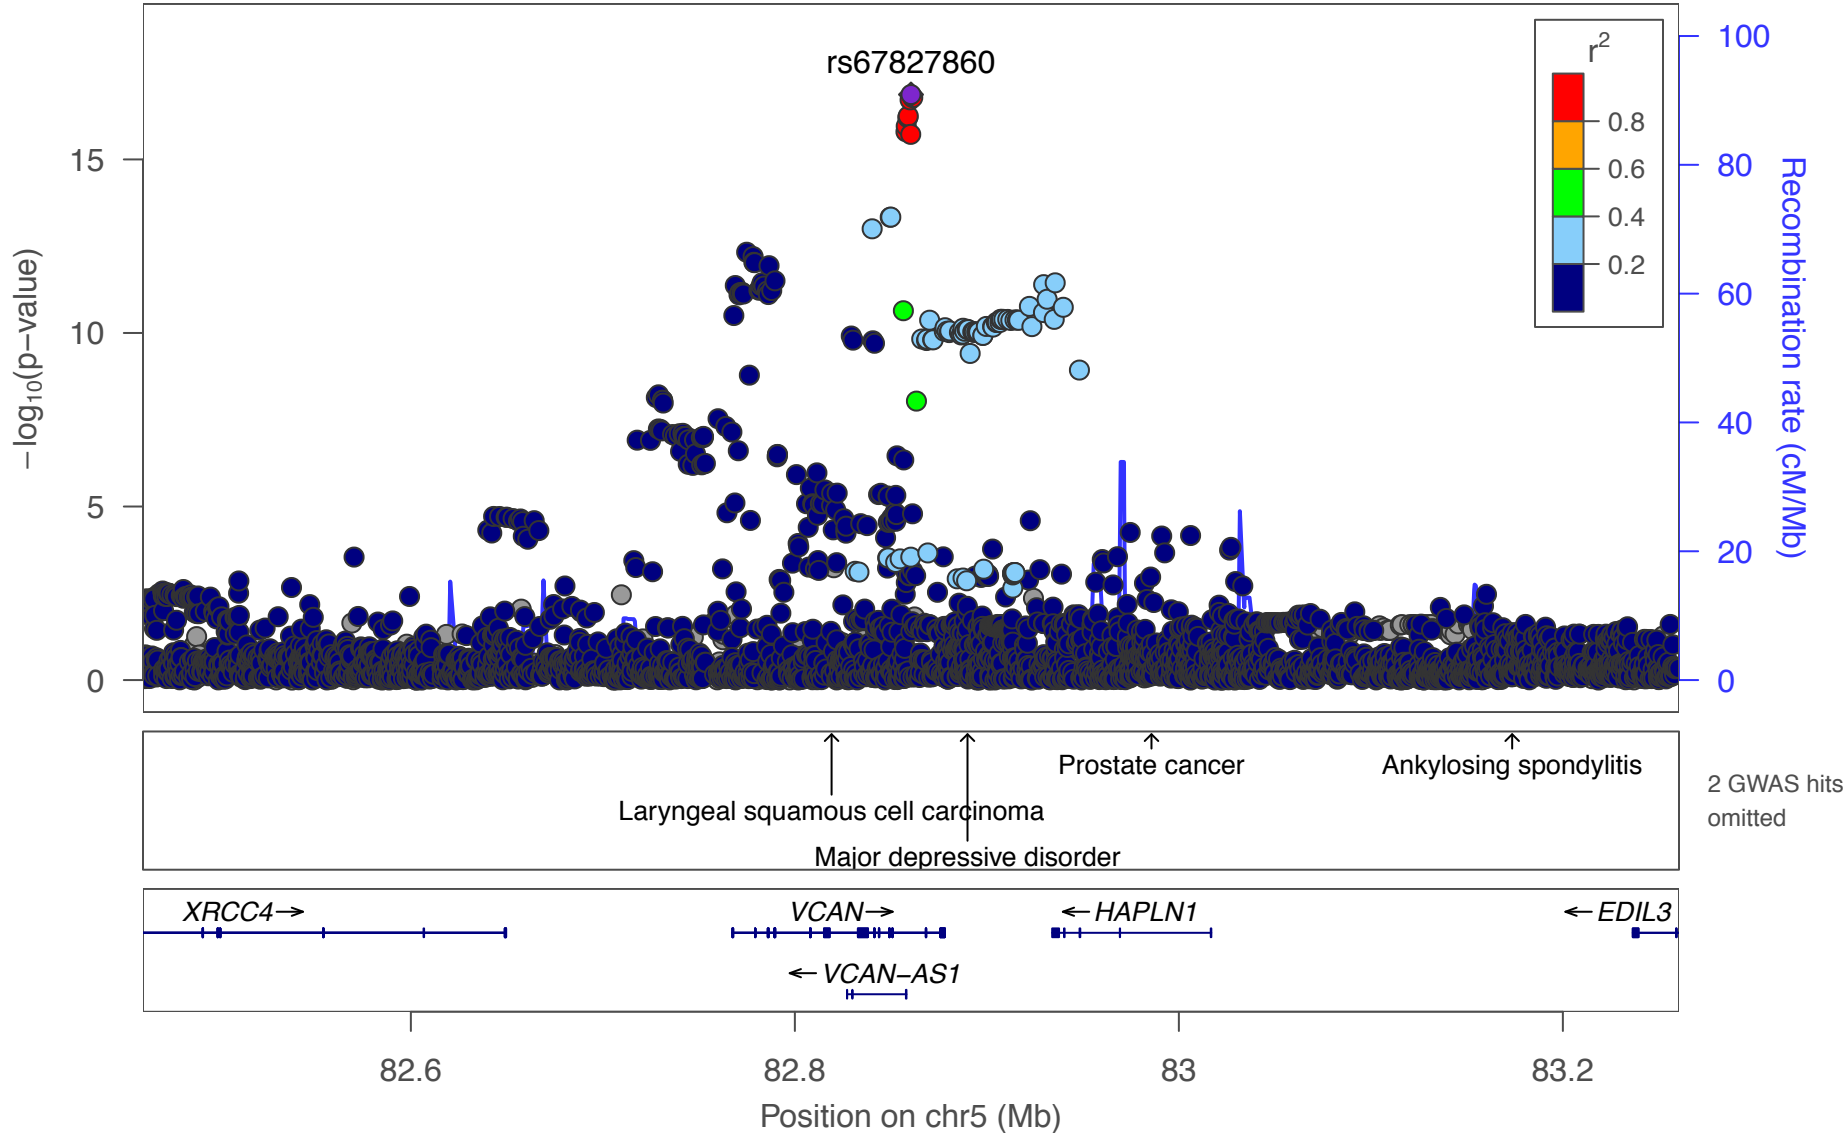

date: Thu Aug 17 17:52:01 2017

build: hg19

display range: chr5:82460485–83260485 [82460485–83260485]

hilite range: 0 – 0 [ 0 – 0 ]

reference SNP: chr5:82860485

number of SNPs plotted: 3393

min P.value: 1.35E–17 [chr5:82860485]

max P.value: 10E–1 [chr5:83115806]

omitted GWAS Hits: NA, NA

## GWAS Catalog SNPs in Region

| <b>chr</b> | <b>pos (Mb)</b> | <b>trait</b>                      | <b>snp</b> |
|------------|-----------------|-----------------------------------|------------|
| 5          | 82.81912        | Laryngeal squamous cell carcinoma | rs310518   |
| 5          | 82.84549        | Diisocyanate-induced asthma       | rs3852186  |
| 5          | 82.88991        | Major depressive disorder         | rs310501   |
| 5          | 82.96073        | Visceral fat                      | rs3846635  |
| 5          | 82.98574        | Prostate cancer                   | rs4466137  |
| 5          | 83.17359        | Ankylosing spondylitis            | rs4552569  |

# TBSS\_MD\_Sagittal\_stratum\_L

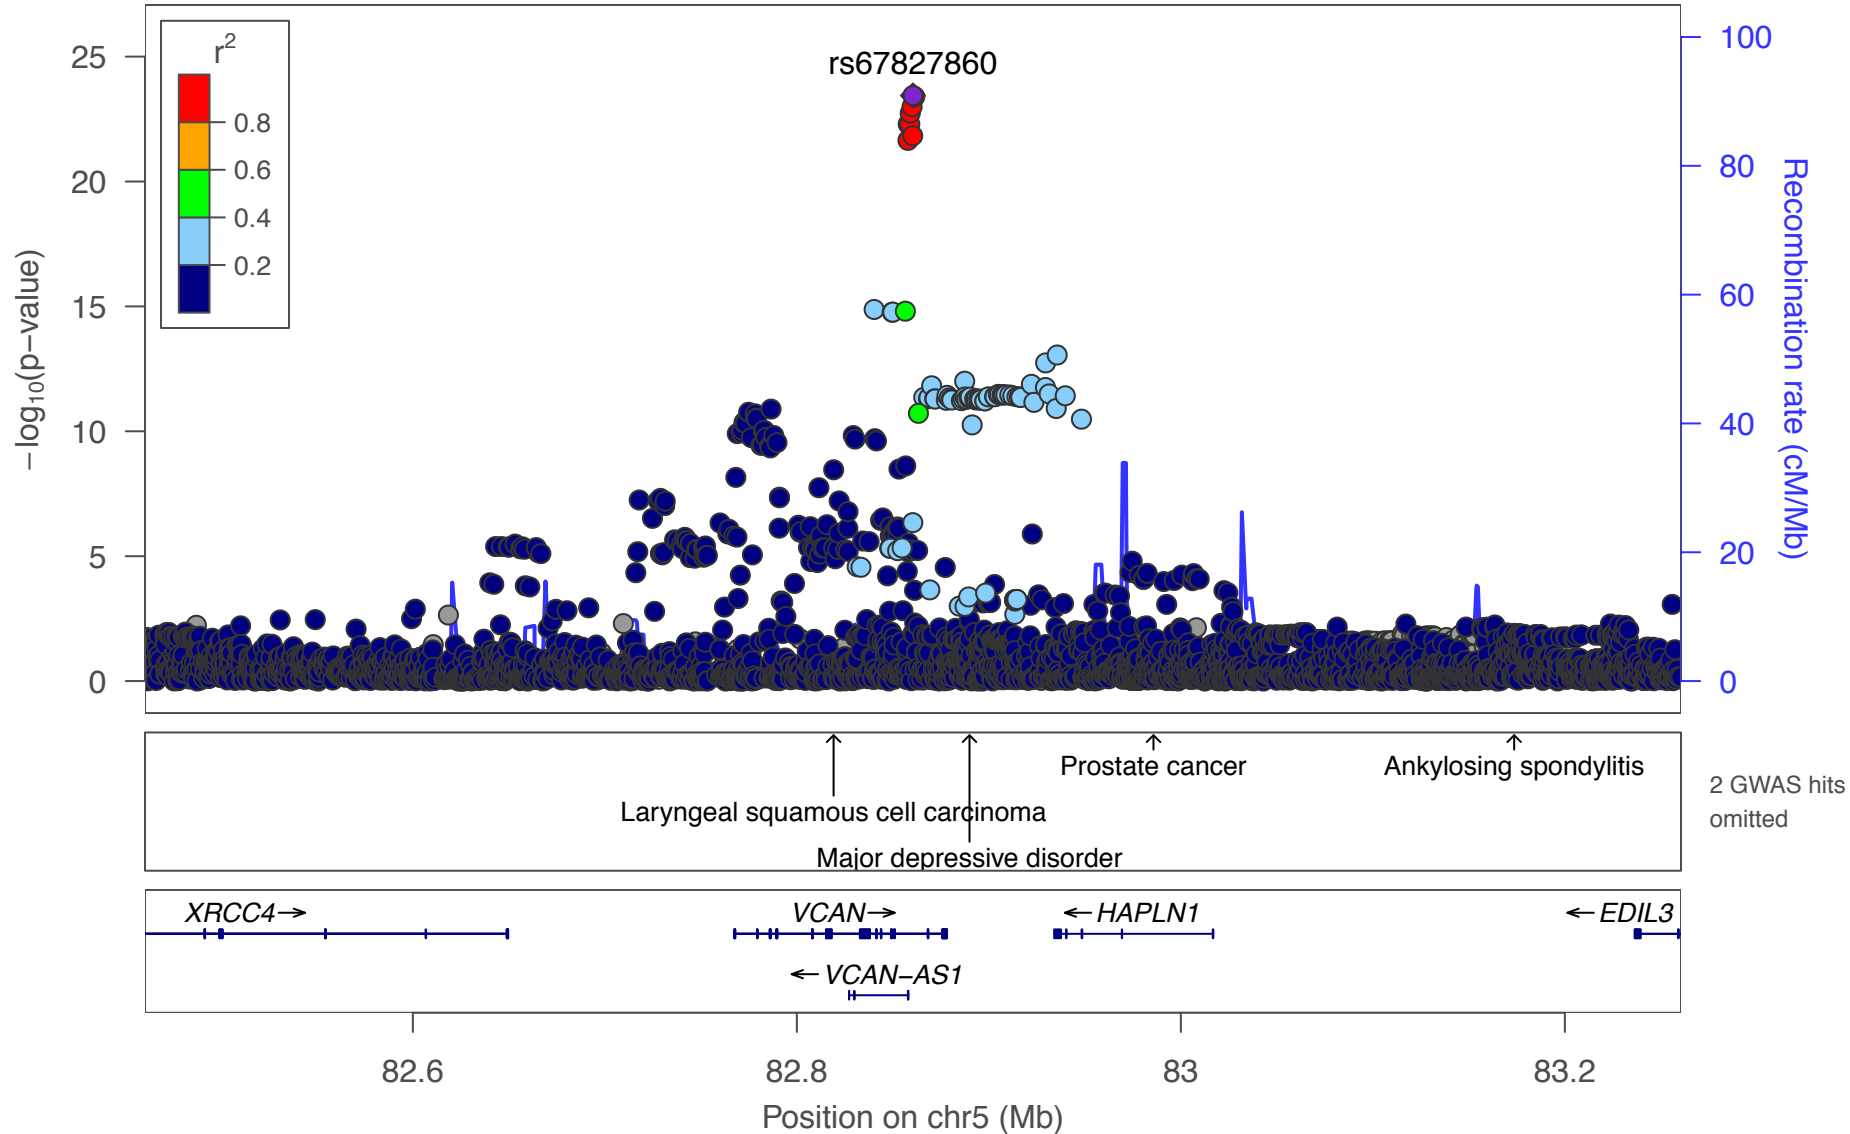



date: Thu Aug 17 17:52:01 2017

build: hg19

display range: chr5:82460485–83260485 [82460485–83260485]

hilite range: 0 – 0 [ 0 – 0 ]

reference SNP: chr5:82860485

number of SNPs plotted: 3393

min P.value: 3.62E–24 [chr5:82860485]

max P.value: 9.99E–1 [chr5:82659709]

omitted GWAS Hits: NA, NA

## GWAS Catalog SNPs in Region

| <b>chr</b> | <b>pos (Mb)</b> | <b>trait</b>                      | <b>snp</b> |
|------------|-----------------|-----------------------------------|------------|
| 5          | 82.81912        | Laryngeal squamous cell carcinoma | rs310518   |
| 5          | 82.84549        | Diisocyanate-induced asthma       | rs3852186  |
| 5          | 82.88991        | Major depressive disorder         | rs310501   |
| 5          | 82.96073        | Visceral fat                      | rs3846635  |
| 5          | 82.98574        | Prostate cancer                   | rs4466137  |
| 5          | 83.17359        | Ankylosing spondylitis            | rs4552569  |

# TBSS\_MD\_Cingulum\_hippocampus\_R

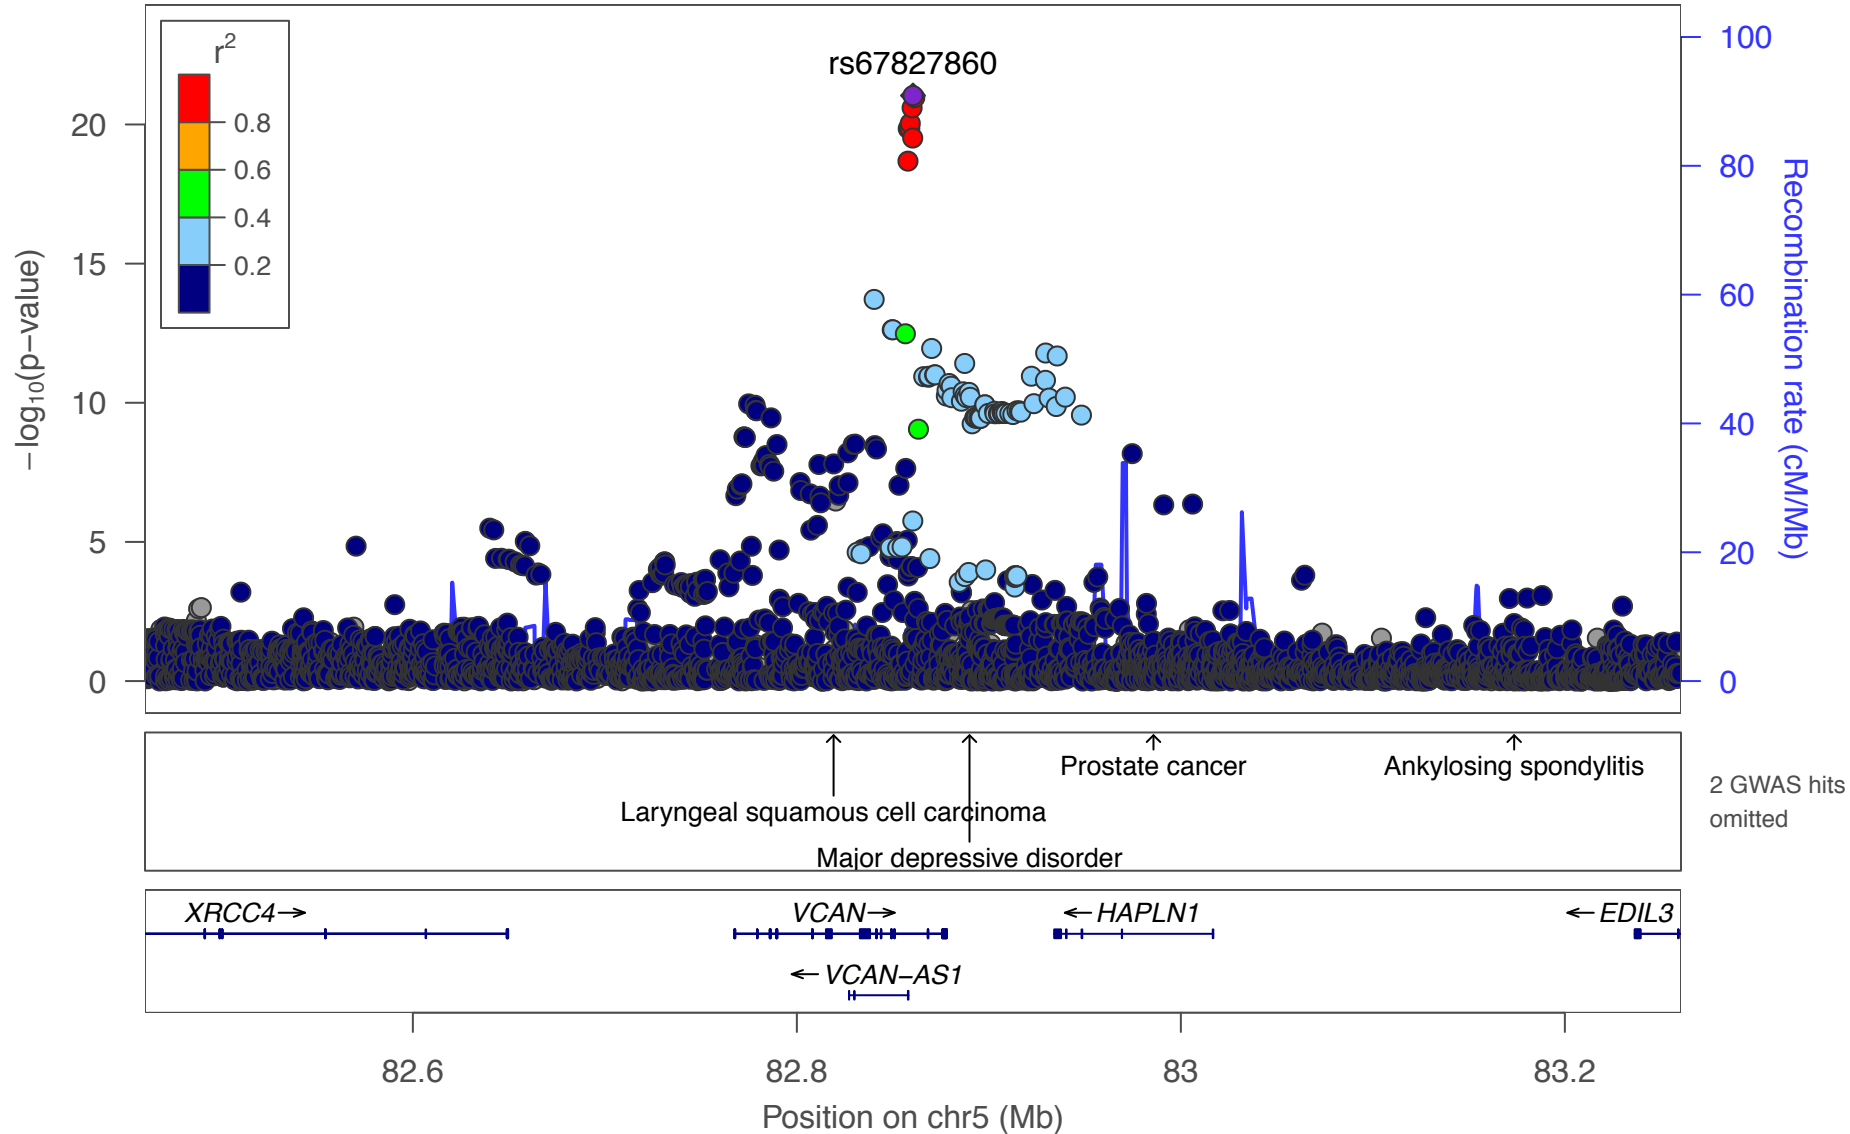

date: Thu Aug 17 17:52:01 2017

build: hg19

display range: chr5:82460485–83260485 [82460485–83260485]

hilite range: 0 – 0 [ 0 – 0 ]

reference SNP: chr5:82860485

number of SNPs plotted: 3393

min P.value: 9.14E–22 [chr5:82860485]

max P.value: 10E–1 [chr5:82966054]

omitted GWAS Hits: NA, NA

## GWAS Catalog SNPs in Region

| <b>chr</b> | <b>pos (Mb)</b> | <b>trait</b>                      | <b>snp</b> |
|------------|-----------------|-----------------------------------|------------|
| 5          | 82.81912        | Laryngeal squamous cell carcinoma | rs310518   |
| 5          | 82.84549        | Diisocyanate-induced asthma       | rs3852186  |
| 5          | 82.88991        | Major depressive disorder         | rs310501   |
| 5          | 82.96073        | Visceral fat                      | rs3846635  |
| 5          | 82.98574        | Prostate cancer                   | rs4466137  |
| 5          | 83.17359        | Ankylosing spondylitis            | rs4552569  |

# TBSS\_MD\_Cingulum\_hippocampus\_L

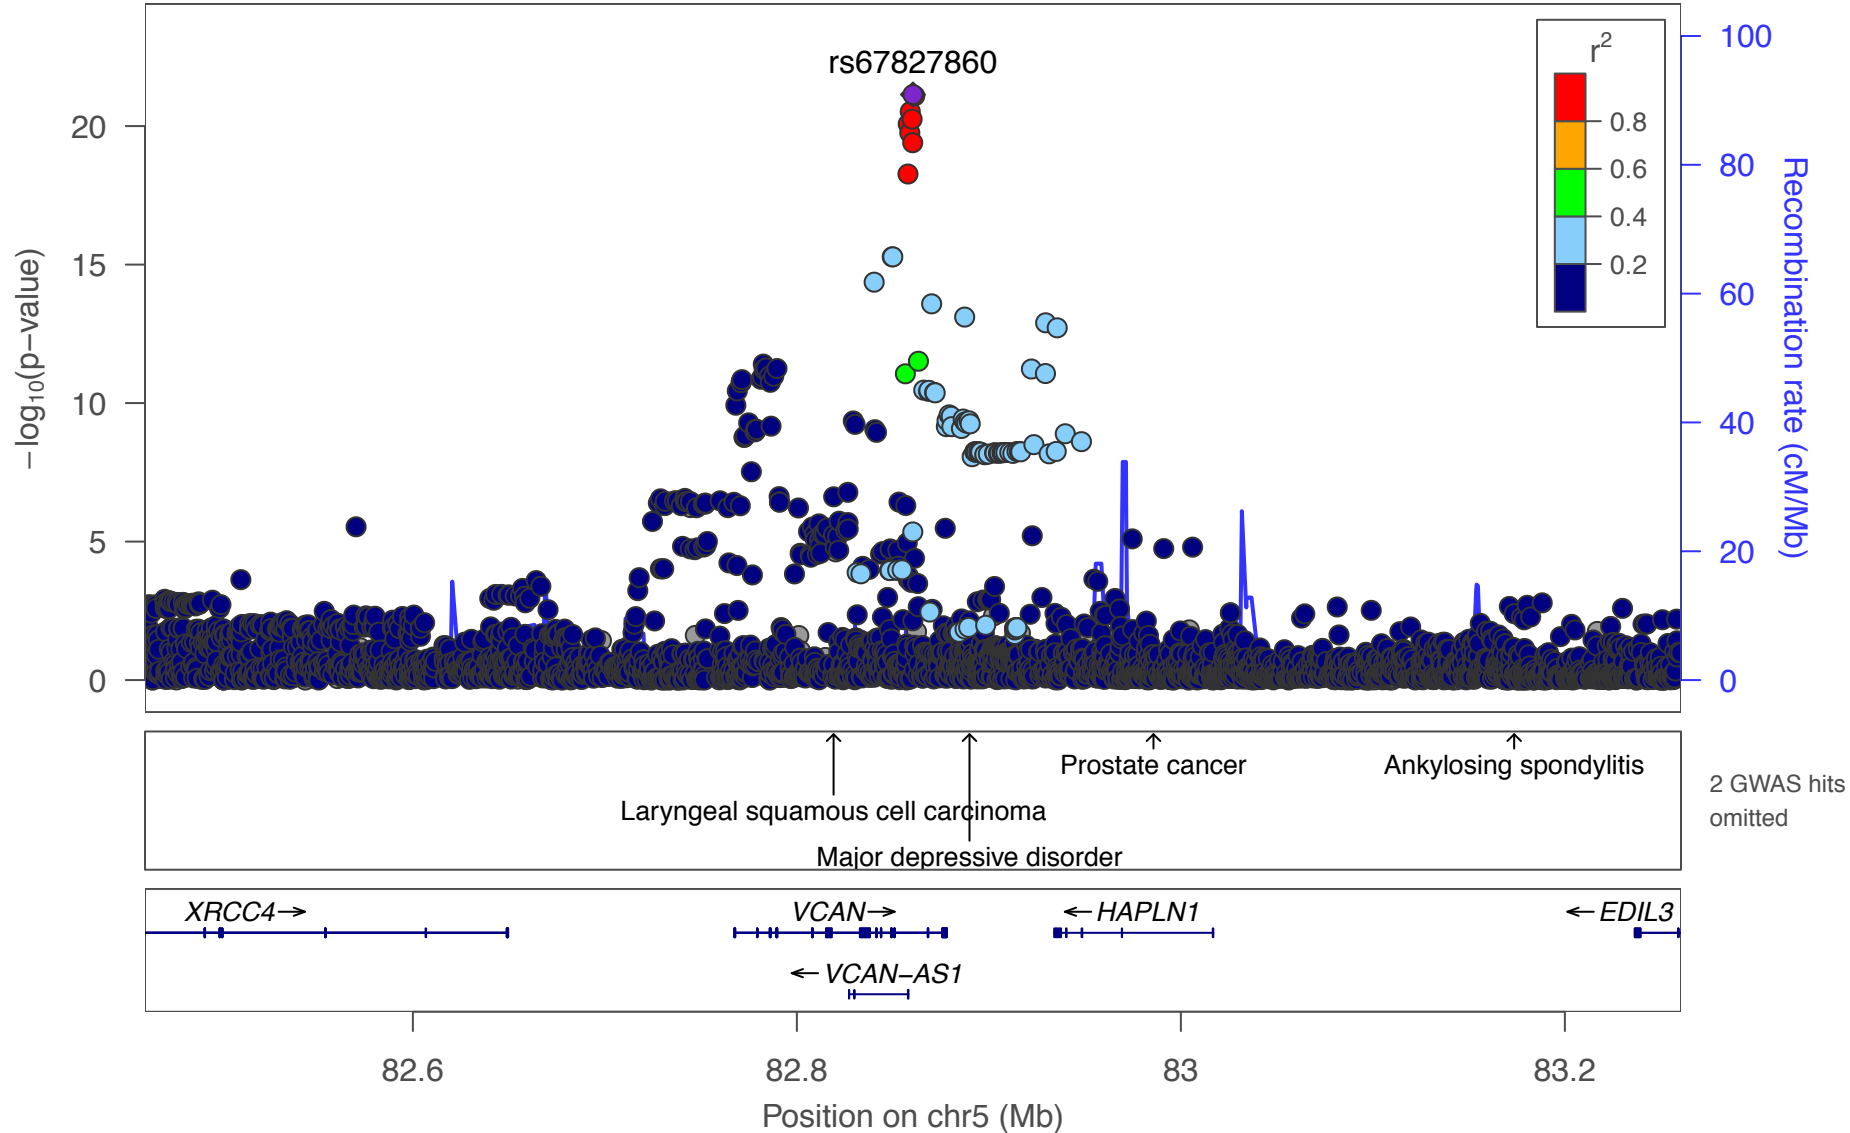

date: Thu Aug 17 17:52:01 2017

build: hg19

display range: chr5:82460485–83260485 [82460485–83260485]

hilite range: 0 – 0 [ 0 – 0 ]

reference SNP: chr5:82860485

number of SNPs plotted: 3393

min P.value: 7.26E–22 [chr5:82860485]

max P.value: 10E–1 [chr5:83178988]

omitted GWAS Hits: NA, NA

## GWAS Catalog SNPs in Region

| <b>chr</b> | <b>pos (Mb)</b> | <b>trait</b>                      | <b>snp</b> |
|------------|-----------------|-----------------------------------|------------|
| 5          | 82.81912        | Laryngeal squamous cell carcinoma | rs310518   |
| 5          | 82.84549        | Diisocyanate-induced asthma       | rs3852186  |
| 5          | 82.88991        | Major depressive disorder         | rs310501   |
| 5          | 82.96073        | Visceral fat                      | rs3846635  |
| 5          | 82.98574        | Prostate cancer                   | rs4466137  |
| 5          | 83.17359        | Ankylosing spondylitis            | rs4552569  |



# TBSS\_MD\_Superior\_longitudinal\_fasciculus\_L

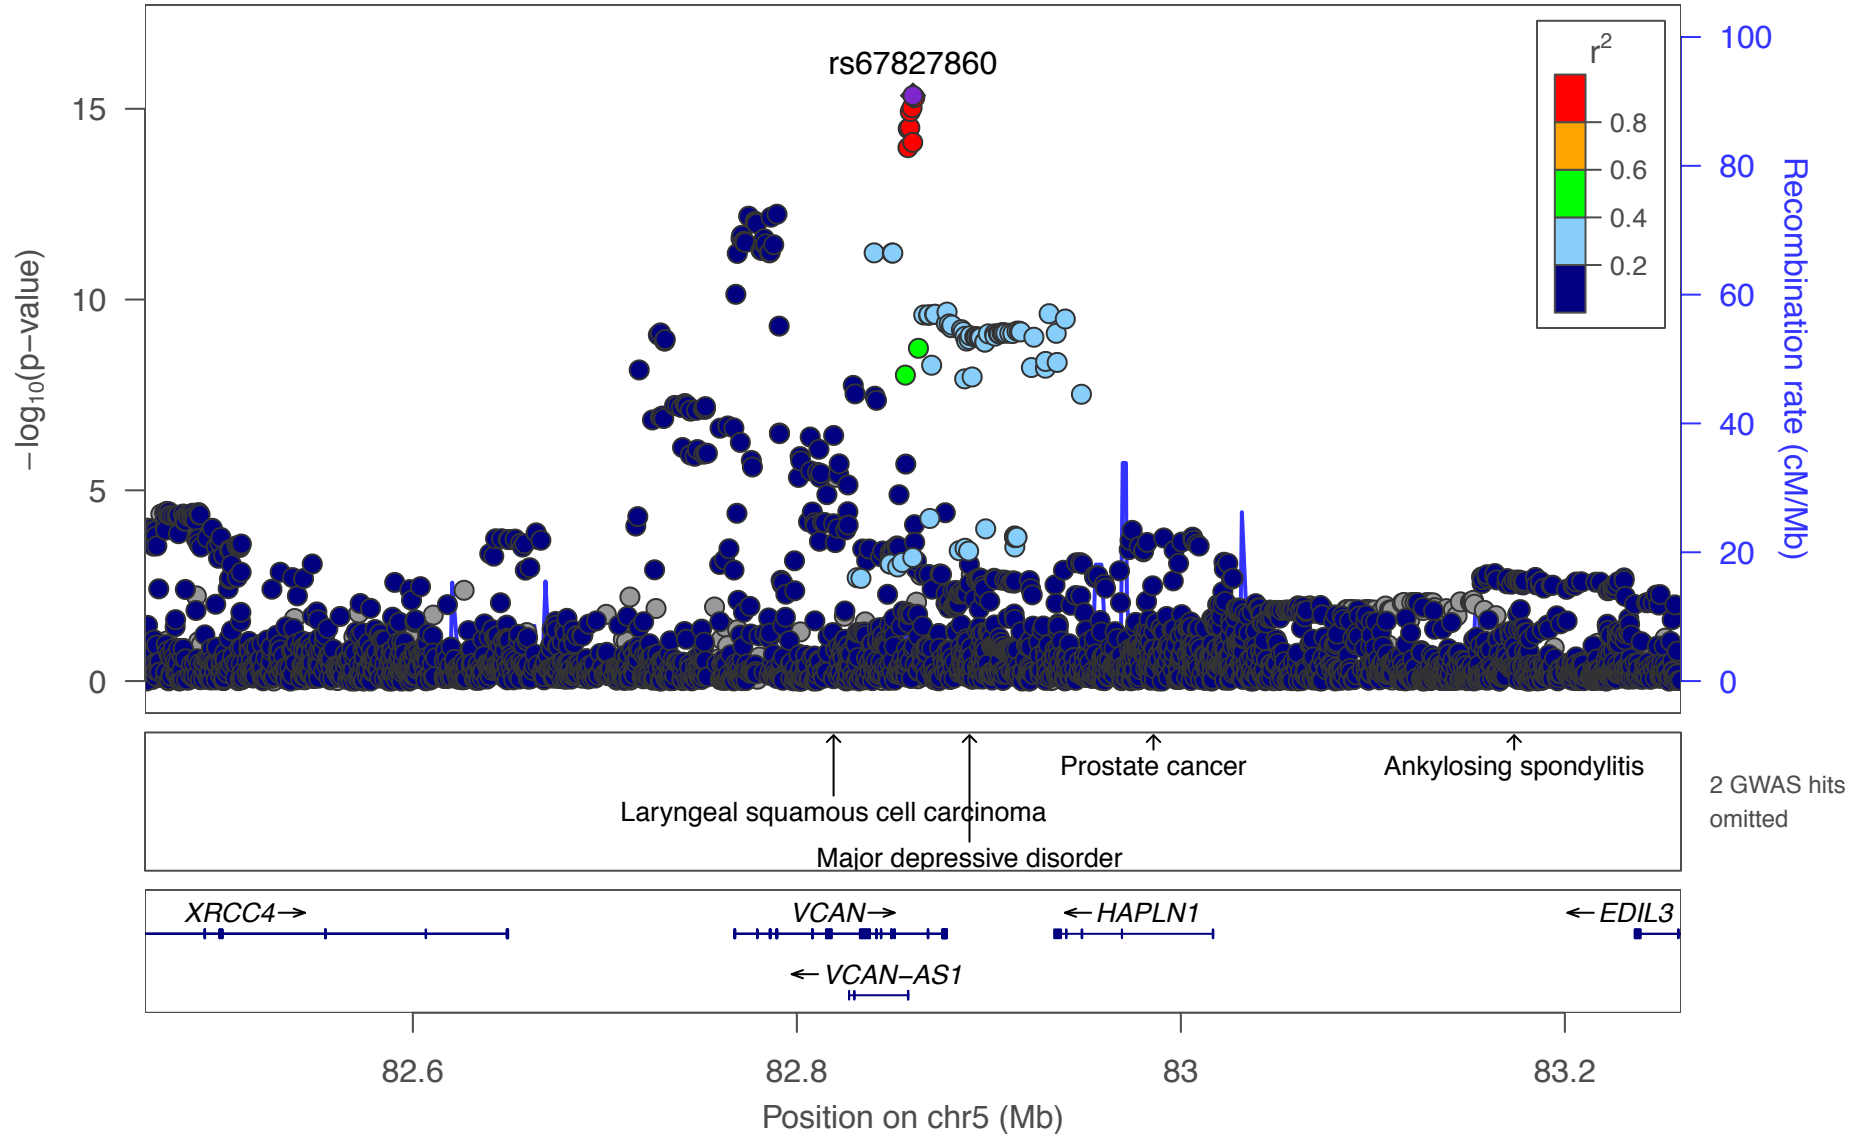

date: Thu Aug 17 17:52:01 2017

build: hg19

display range: chr5:82460485–83260485 [82460485–83260485]

hilite range: 0 – 0 [ 0 – 0 ]

reference SNP: chr5:82860485

number of SNPs plotted: 3393

min P.value: 4.5E–16 [chr5:82860485]

max P.value: 10E–1 [chr5:83165955]

omitted GWAS Hits: NA, NA

## GWAS Catalog SNPs in Region

| <b>chr</b> | <b>pos (Mb)</b> | <b>trait</b>                      | <b>snp</b> |
|------------|-----------------|-----------------------------------|------------|
| 5          | 82.81912        | Laryngeal squamous cell carcinoma | rs310518   |
| 5          | 82.84549        | Diisocyanate-induced asthma       | rs3852186  |
| 5          | 82.88991        | Major depressive disorder         | rs310501   |
| 5          | 82.96073        | Visceral fat                      | rs3846635  |
| 5          | 82.98574        | Prostate cancer                   | rs4466137  |
| 5          | 83.17359        | Ankylosing spondylitis            | rs4552569  |

# TBSS\_L2\_Superior\_corona\_radiata\_R

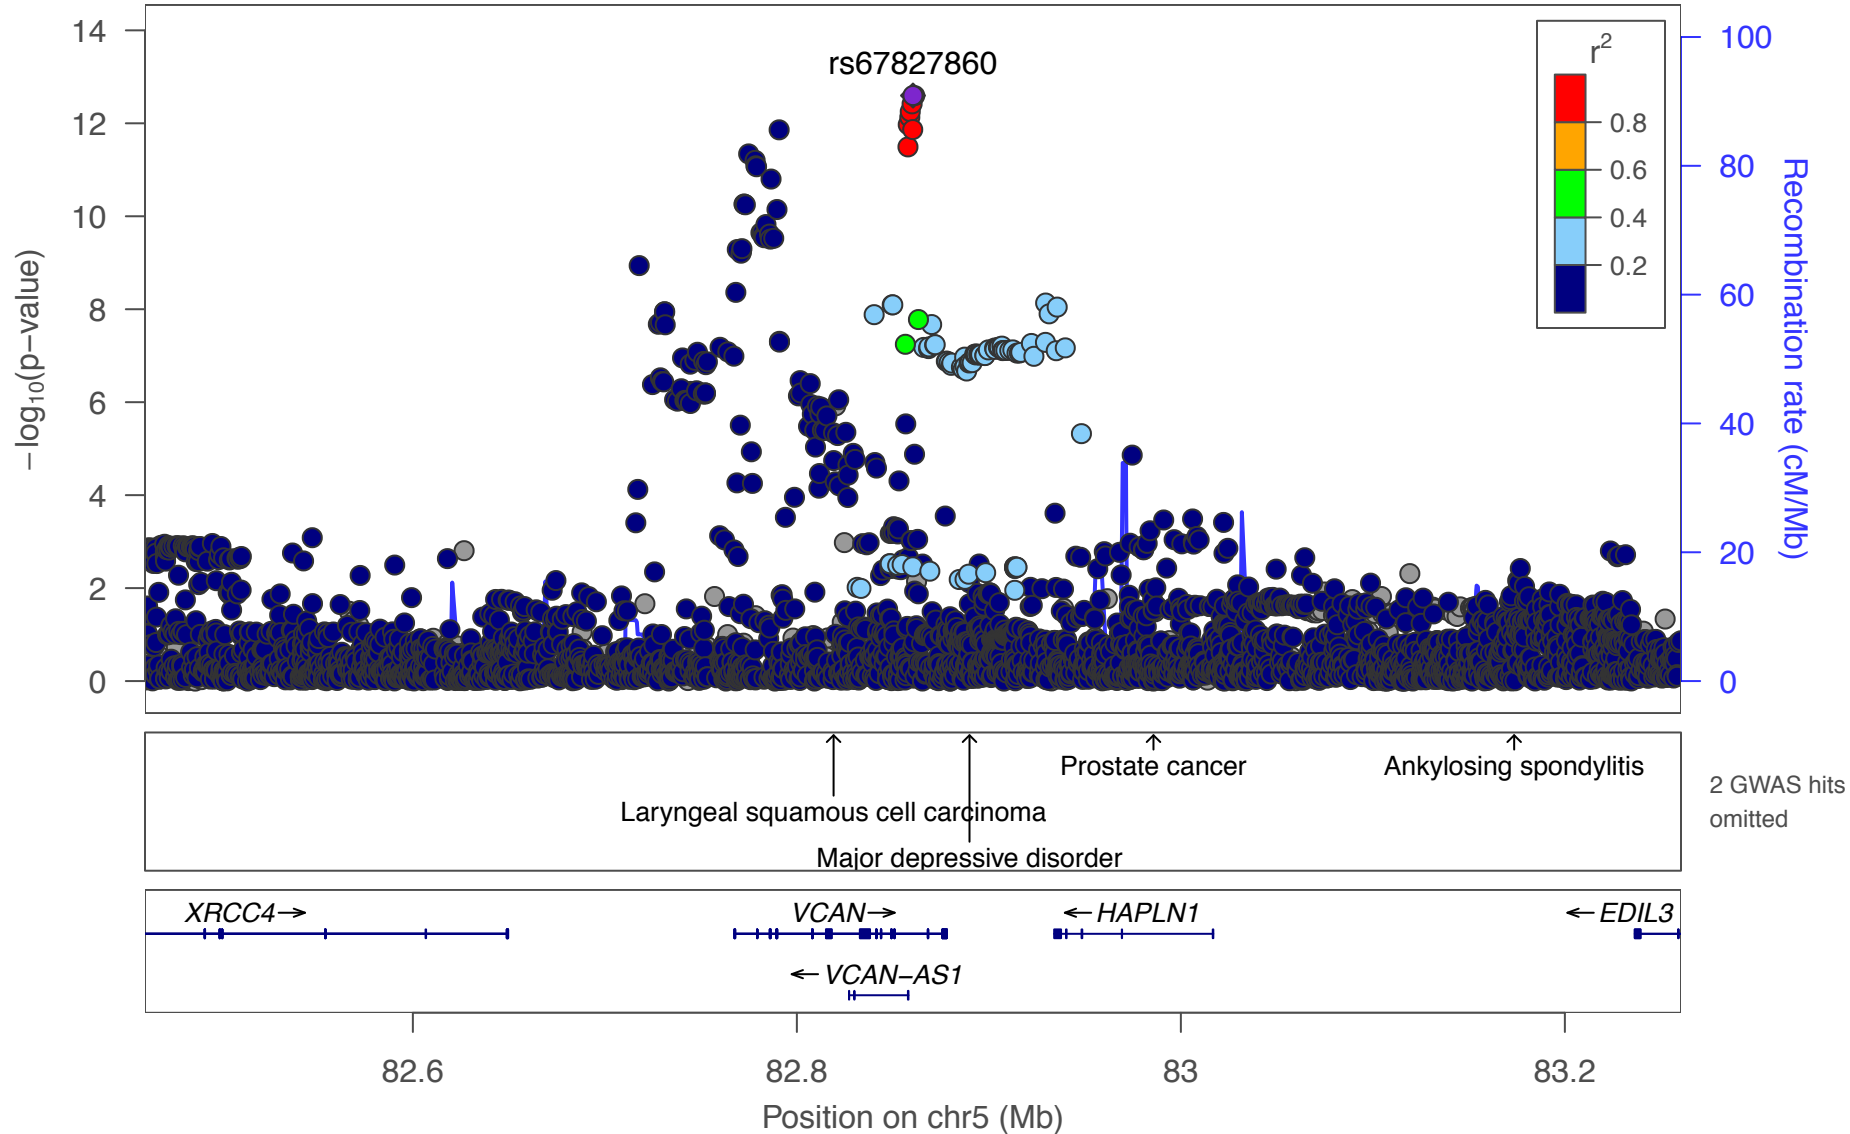

date: Thu Aug 17 17:52:01 2017

build: hg19

display range: chr5:82460485–83260485 [82460485–83260485]

hilite range: 0 – 0 [ 0 – 0 ]

reference SNP: chr5:82860485

number of SNPs plotted: 3393

min P.value: 2.53E–13 [chr5:82860485]

max P.value: 10E–1 [chr5:83115847]

omitted GWAS Hits: NA, NA

## GWAS Catalog SNPs in Region

| <b>chr</b> | <b>pos (Mb)</b> | <b>trait</b>                      | <b>snp</b> |
|------------|-----------------|-----------------------------------|------------|
| 5          | 82.81912        | Laryngeal squamous cell carcinoma | rs310518   |
| 5          | 82.84549        | Diisocyanate-induced asthma       | rs3852186  |
| 5          | 82.88991        | Major depressive disorder         | rs310501   |
| 5          | 82.96073        | Visceral fat                      | rs3846635  |
| 5          | 82.98574        | Prostate cancer                   | rs4466137  |
| 5          | 83.17359        | Ankylosing spondylitis            | rs4552569  |

# TBSS\_L2\_Sagittal\_stratum\_L

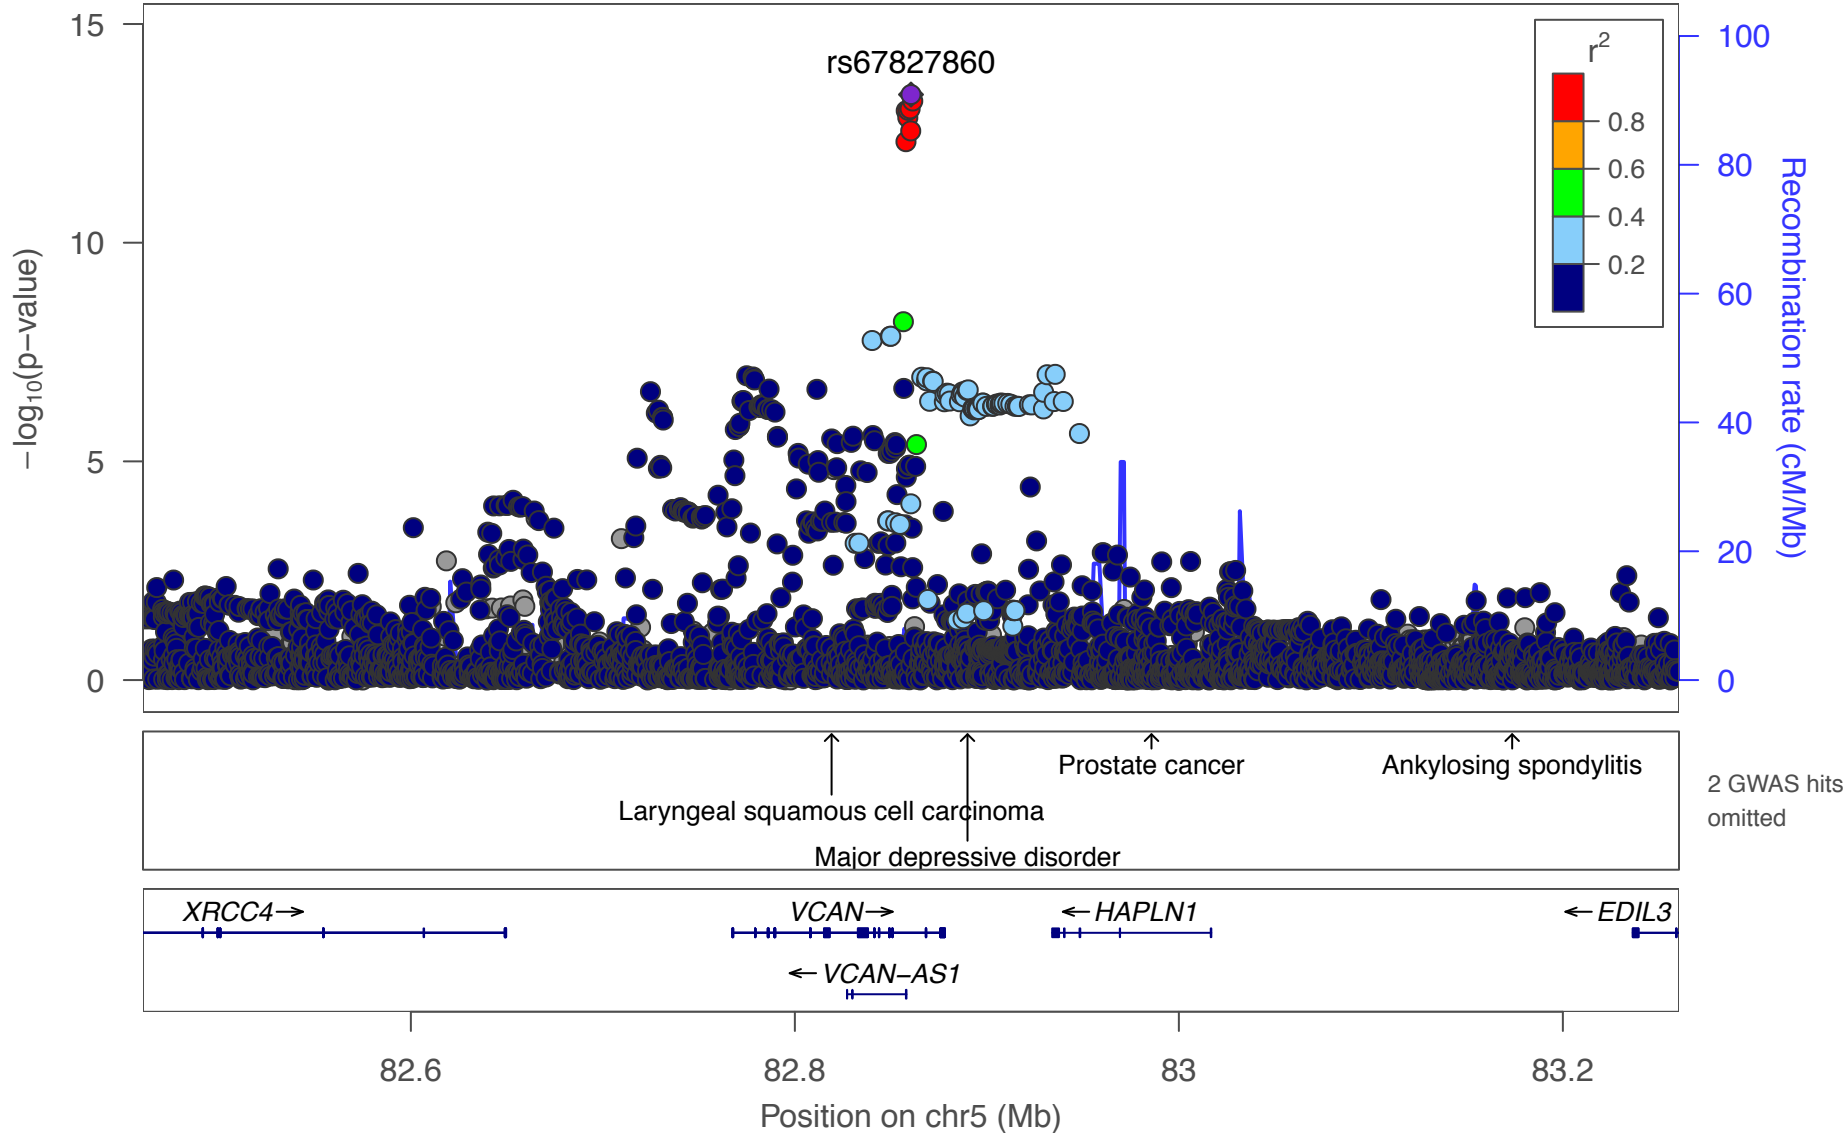

date: Thu Aug 17 17:52:01 2017

build: hg19

display range: chr5:82460485–83260485 [82460485–83260485]

hilite range: 0 – 0 [ 0 – 0 ]

reference SNP: chr5:82860485

number of SNPs plotted: 3393

min P.value: 4.1E–14 [chr5:82860485]

max P.value: 10E–1 [chr5:82973210]

omitted GWAS Hits: NA, NA



## GWAS Catalog SNPs in Region

| <b>chr</b> | <b>pos (Mb)</b> | <b>trait</b>                      | <b>snp</b> |
|------------|-----------------|-----------------------------------|------------|
| 5          | 82.81912        | Laryngeal squamous cell carcinoma | rs310518   |
| 5          | 82.84549        | Diisocyanate-induced asthma       | rs3852186  |
| 5          | 82.88991        | Major depressive disorder         | rs310501   |
| 5          | 82.96073        | Visceral fat                      | rs3846635  |
| 5          | 82.98574        | Prostate cancer                   | rs4466137  |
| 5          | 83.17359        | Ankylosing spondylitis            | rs4552569  |

# TBSS\_L2\_Cingulum\_cingulate\_gyrus\_L

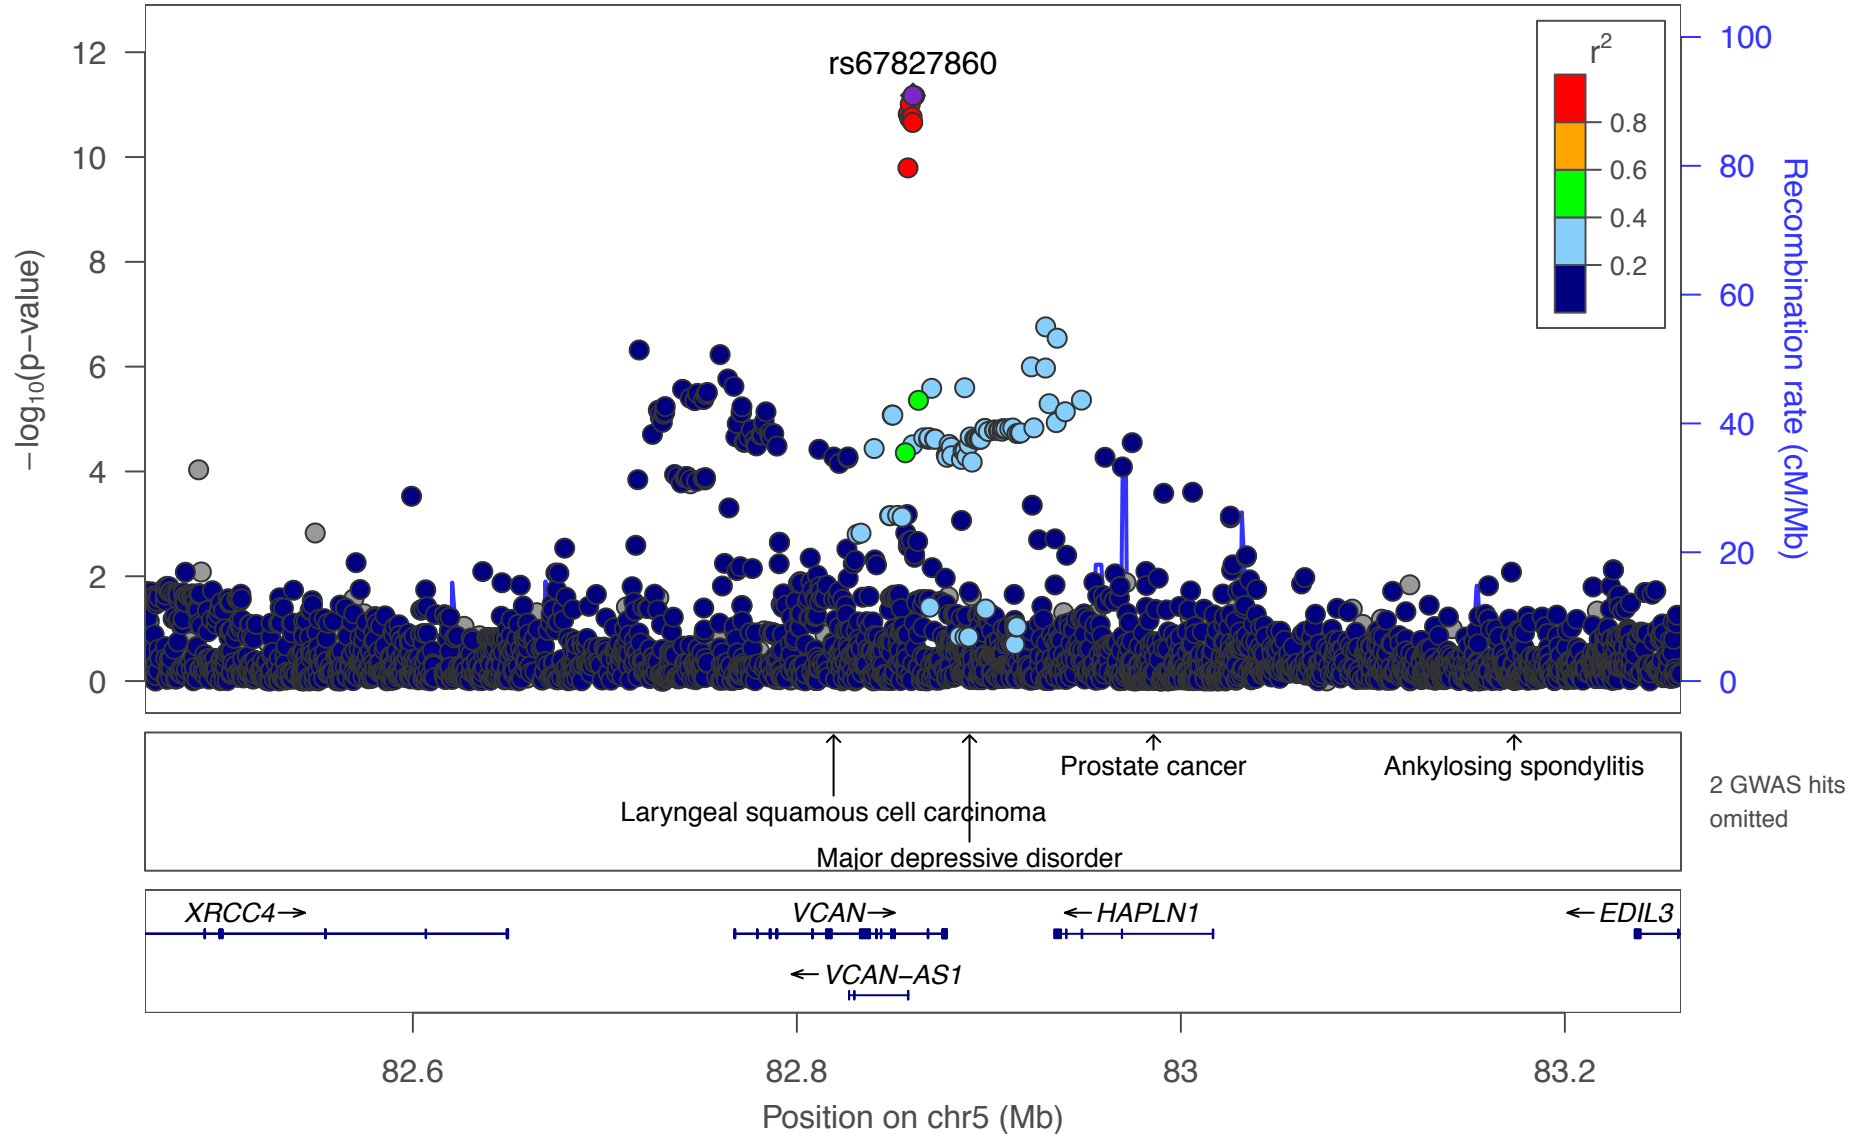

date: Thu Aug 17 17:52:01 2017

build: hg19

display range: chr5:82460485–83260485 [82460485–83260485]

hilite range: 0 – 0 [ 0 – 0 ]

reference SNP: chr5:82860485

number of SNPs plotted: 3393

min P.value: 6.71E–12 [chr5:82860485]

max P.value: 9.98E–1 [chr5:82730502]

omitted GWAS Hits: NA, NA

## GWAS Catalog SNPs in Region

| <b>chr</b> | <b>pos (Mb)</b> | <b>trait</b>                      | <b>snp</b> |
|------------|-----------------|-----------------------------------|------------|
| 5          | 82.81912        | Laryngeal squamous cell carcinoma | rs310518   |
| 5          | 82.84549        | Diisocyanate-induced asthma       | rs3852186  |
| 5          | 82.88991        | Major depressive disorder         | rs310501   |
| 5          | 82.96073        | Visceral fat                      | rs3846635  |
| 5          | 82.98574        | Prostate cancer                   | rs4466137  |
| 5          | 83.17359        | Ankylosing spondylitis            | rs4552569  |

# TBSS\_L2\_Cingulum\_hippocampus\_R

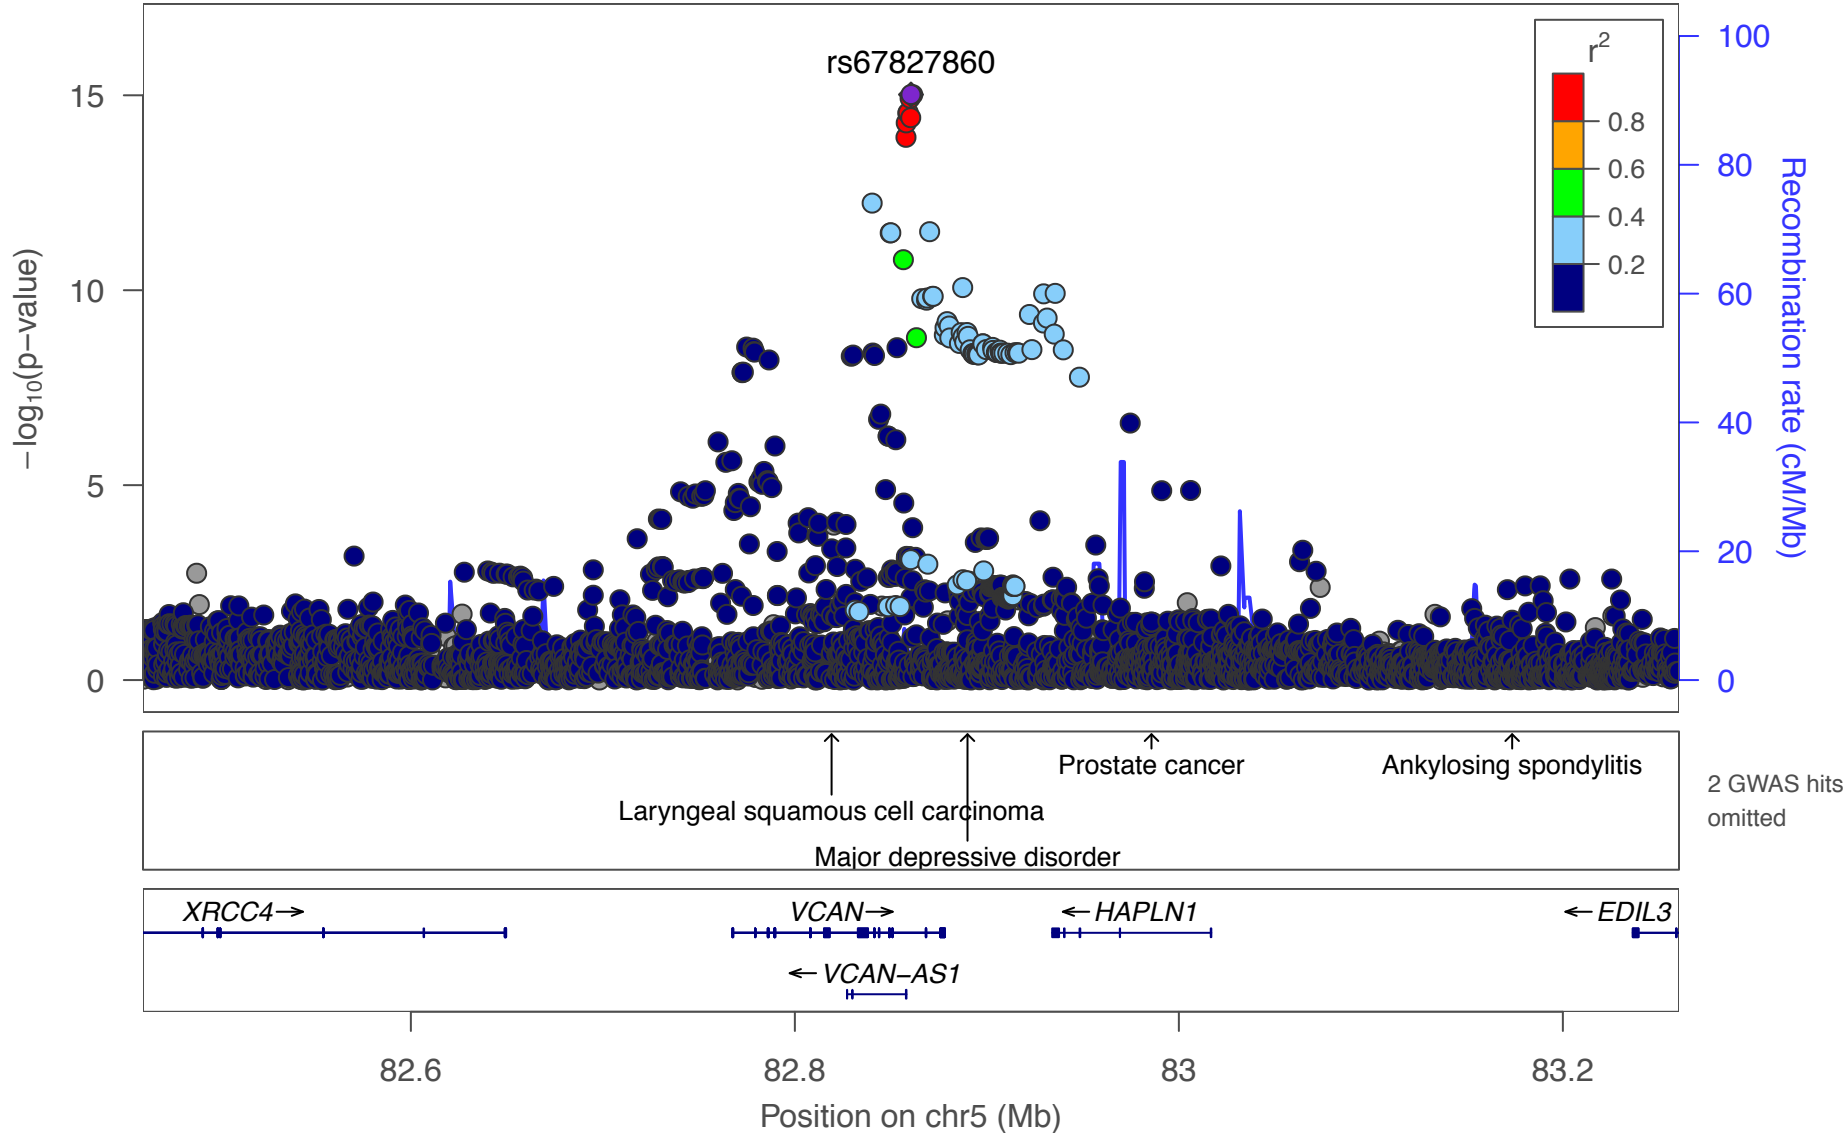

date: Thu Aug 17 17:52:01 2017

build: hg19

display range: chr5:82460485–83260485 [82460485–83260485]

hilite range: 0 – 0 [ 0 – 0 ]

reference SNP: chr5:82860485

number of SNPs plotted: 3393

min P.value: 9.57E–16 [chr5:82860485]

max P.value: 9.99E–1 [chr5:82830595]

omitted GWAS Hits: NA, NA

## GWAS Catalog SNPs in Region

| <b>chr</b> | <b>pos (Mb)</b> | <b>trait</b>                      | <b>snp</b> |
|------------|-----------------|-----------------------------------|------------|
| 5          | 82.81912        | Laryngeal squamous cell carcinoma | rs310518   |
| 5          | 82.84549        | Diisocyanate-induced asthma       | rs3852186  |
| 5          | 82.88991        | Major depressive disorder         | rs310501   |
| 5          | 82.96073        | Visceral fat                      | rs3846635  |
| 5          | 82.98574        | Prostate cancer                   | rs4466137  |
| 5          | 83.17359        | Ankylosing spondylitis            | rs4552569  |

# TBSS\_L3\_Superior\_corona\_radiata\_R

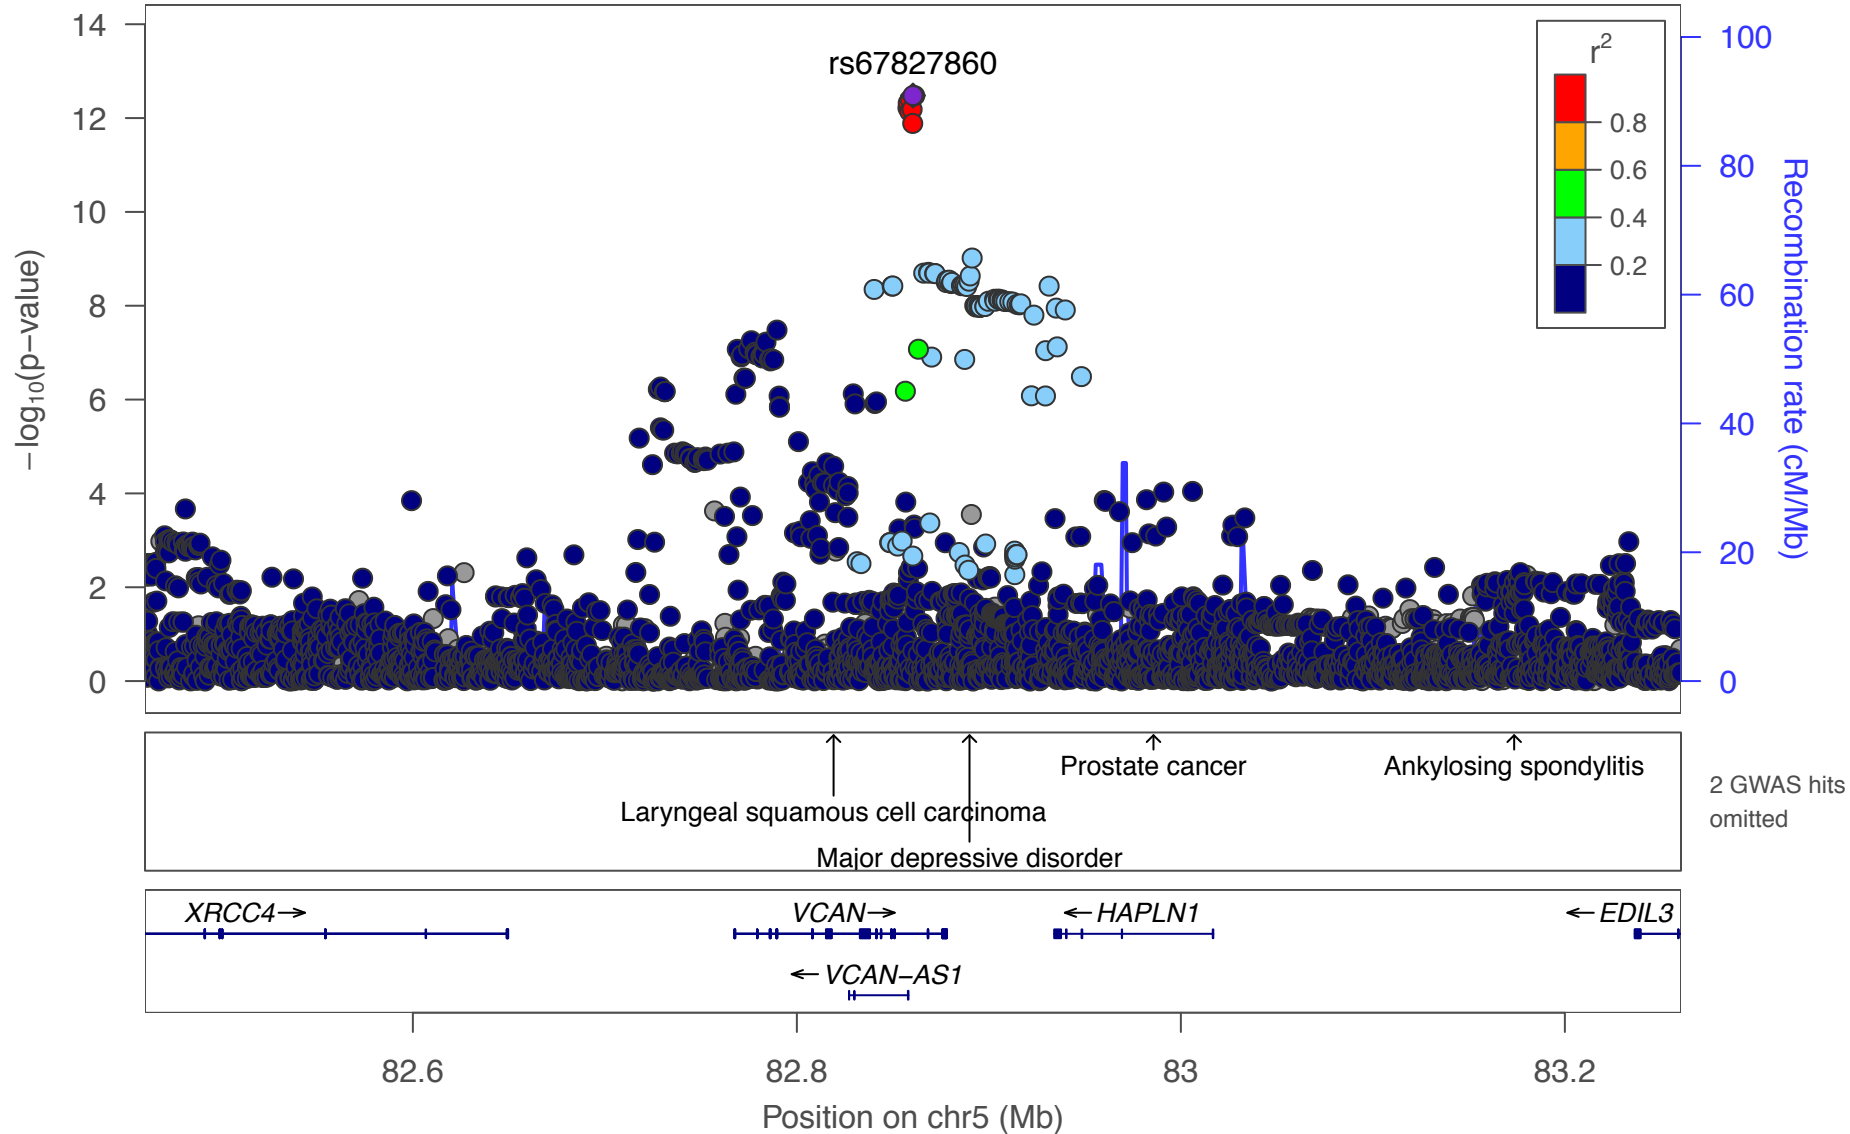



date: Thu Aug 17 17:52:01 2017

build: hg19

display range: chr5:82460485–83260485 [82460485–83260485]

hilite range: 0 – 0 [ 0 – 0 ]

reference SNP: chr5:82860485

number of SNPs plotted: 3393

min P.value: 3.31E–13 [chr5:82860485]

max P.value: 10E–1 [chr5:82867968]

omitted GWAS Hits: NA, NA

## GWAS Catalog SNPs in Region

| <b>chr</b> | <b>pos (Mb)</b> | <b>trait</b>                      | <b>snp</b> |
|------------|-----------------|-----------------------------------|------------|
| 5          | 82.81912        | Laryngeal squamous cell carcinoma | rs310518   |
| 5          | 82.84549        | Diisocyanate-induced asthma       | rs3852186  |
| 5          | 82.88991        | Major depressive disorder         | rs310501   |
| 5          | 82.96073        | Visceral fat                      | rs3846635  |
| 5          | 82.98574        | Prostate cancer                   | rs4466137  |
| 5          | 83.17359        | Ankylosing spondylitis            | rs4552569  |

# TBSS\_L3\_Posterior\_thalamic\_radiation\_L

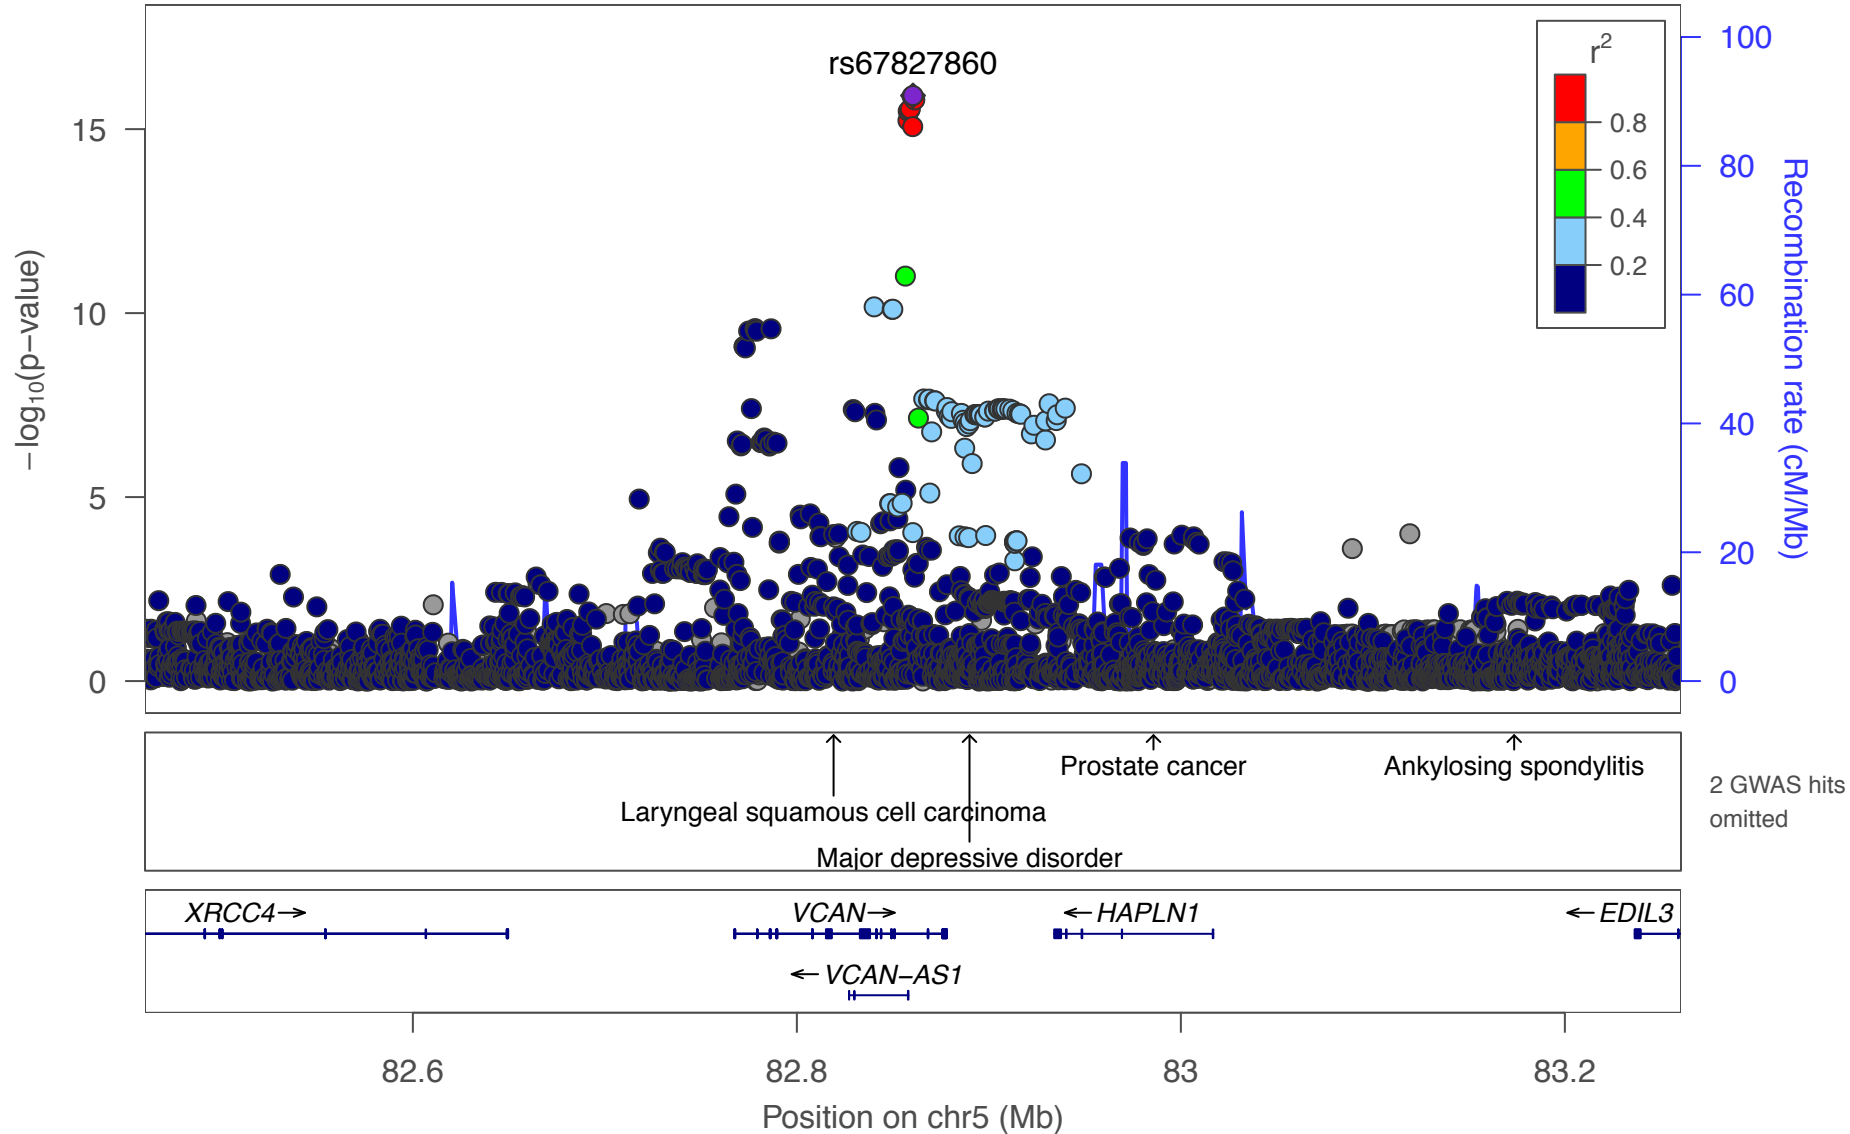

date: Thu Aug 17 17:52:01 2017

build: hg19

display range: chr5:82460485–83260485 [82460485–83260485]

hilite range: 0 – 0 [ 0 – 0 ]

reference SNP: chr5:82860485

number of SNPs plotted: 3393

min P.value: 1.22E–16 [chr5:82860485]

max P.value: 10E–1 [chr5:83097880]

omitted GWAS Hits: NA, NA

## GWAS Catalog SNPs in Region

| <b>chr</b> | <b>pos (Mb)</b> | <b>trait</b>                      | <b>snp</b> |
|------------|-----------------|-----------------------------------|------------|
| 5          | 82.81912        | Laryngeal squamous cell carcinoma | rs310518   |
| 5          | 82.84549        | Diisocyanate-induced asthma       | rs3852186  |
| 5          | 82.88991        | Major depressive disorder         | rs310501   |
| 5          | 82.96073        | Visceral fat                      | rs3846635  |
| 5          | 82.98574        | Prostate cancer                   | rs4466137  |
| 5          | 83.17359        | Ankylosing spondylitis            | rs4552569  |

# TBSS\_L3\_Sagittal\_stratum\_R

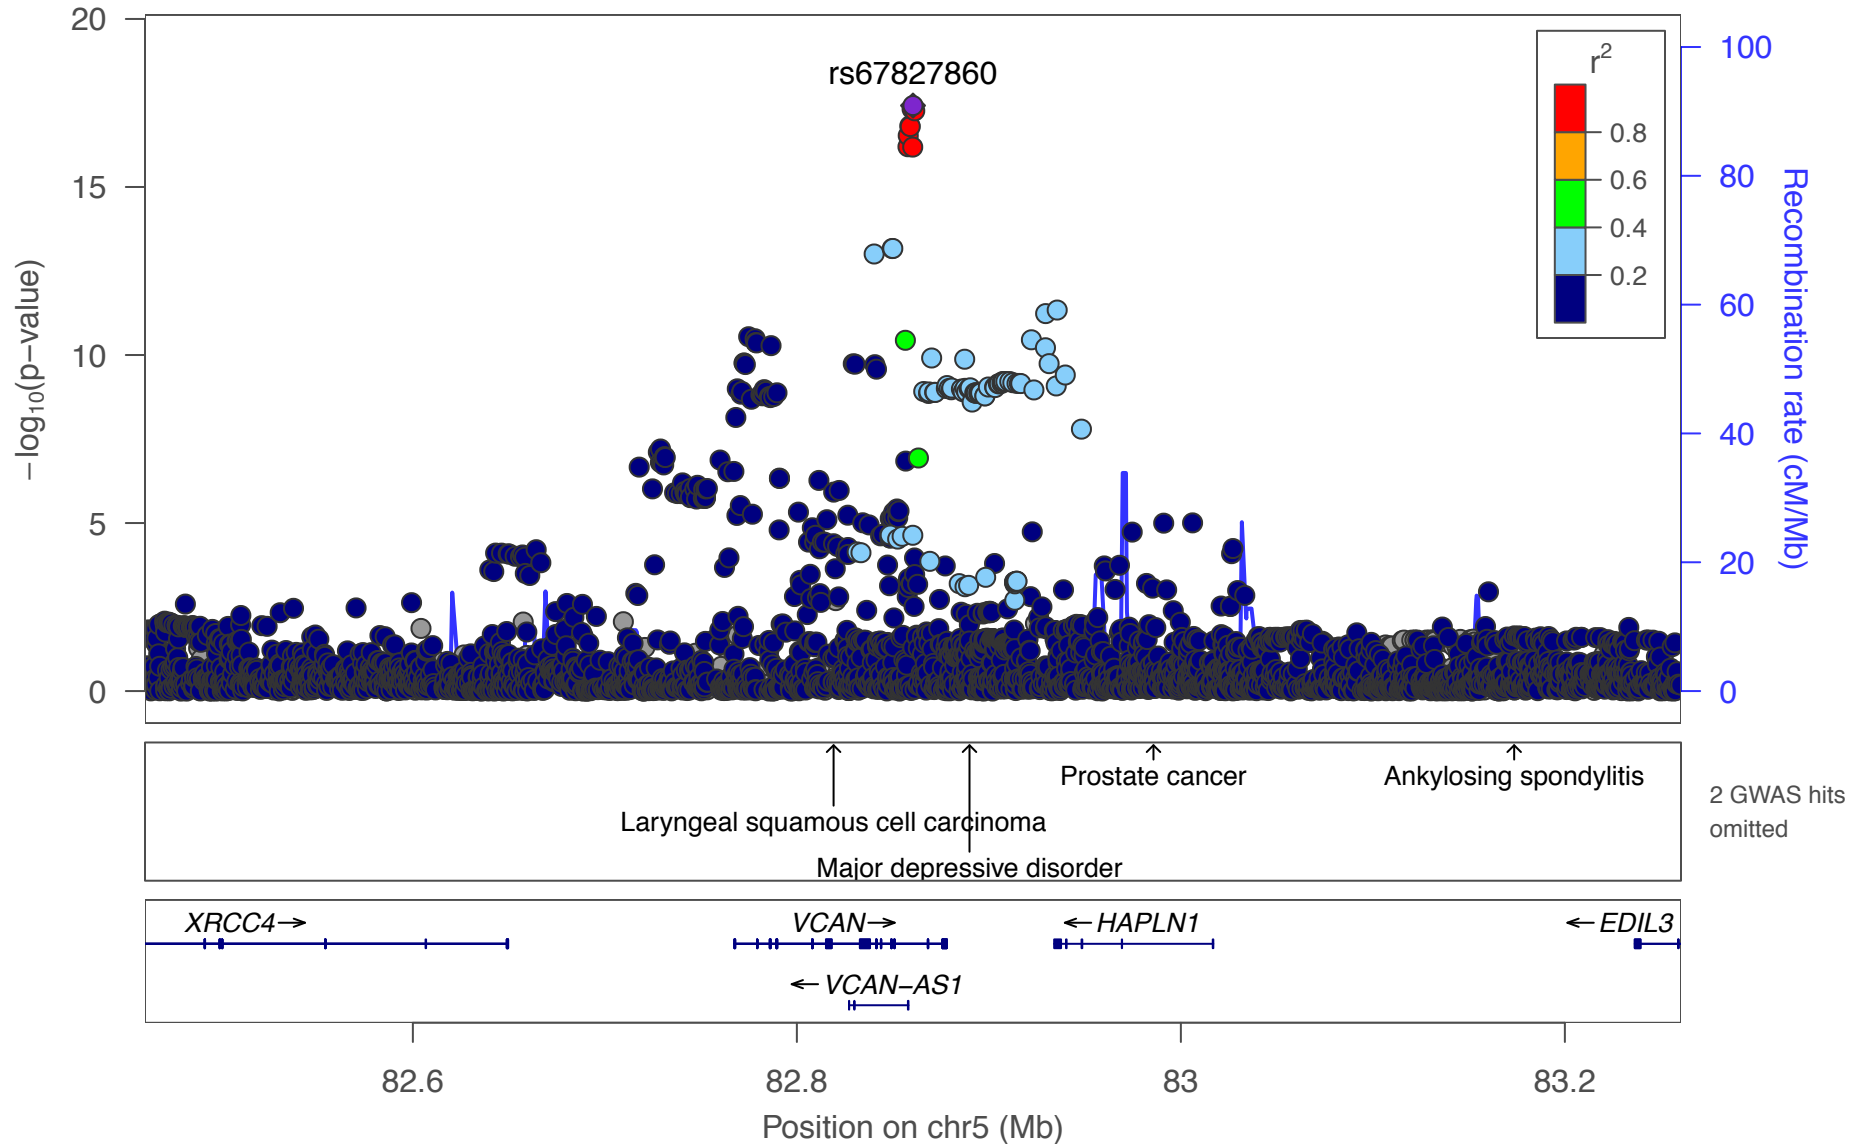

date: Thu Aug 17 17:52:01 2017

build: hg19

display range: chr5:82460485–83260485 [82460485–83260485]

hilite range: 0 – 0 [ 0 – 0 ]

reference SNP: chr5:82860485

number of SNPs plotted: 3393

min P.value: 3.78E–18 [chr5:82860485]

max P.value: 9.99E–1 [chr5:82495239]

omitted GWAS Hits: NA, NA

## GWAS Catalog SNPs in Region

| <b>chr</b> | <b>pos (Mb)</b> | <b>trait</b>                      | <b>snp</b> |
|------------|-----------------|-----------------------------------|------------|
| 5          | 82.81912        | Laryngeal squamous cell carcinoma | rs310518   |
| 5          | 82.84549        | Diisocyanate-induced asthma       | rs3852186  |
| 5          | 82.88991        | Major depressive disorder         | rs310501   |
| 5          | 82.96073        | Visceral fat                      | rs3846635  |
| 5          | 82.98574        | Prostate cancer                   | rs4466137  |
| 5          | 83.17359        | Ankylosing spondylitis            | rs4552569  |



# TBSS\_L3\_Sagittal\_stratum\_L

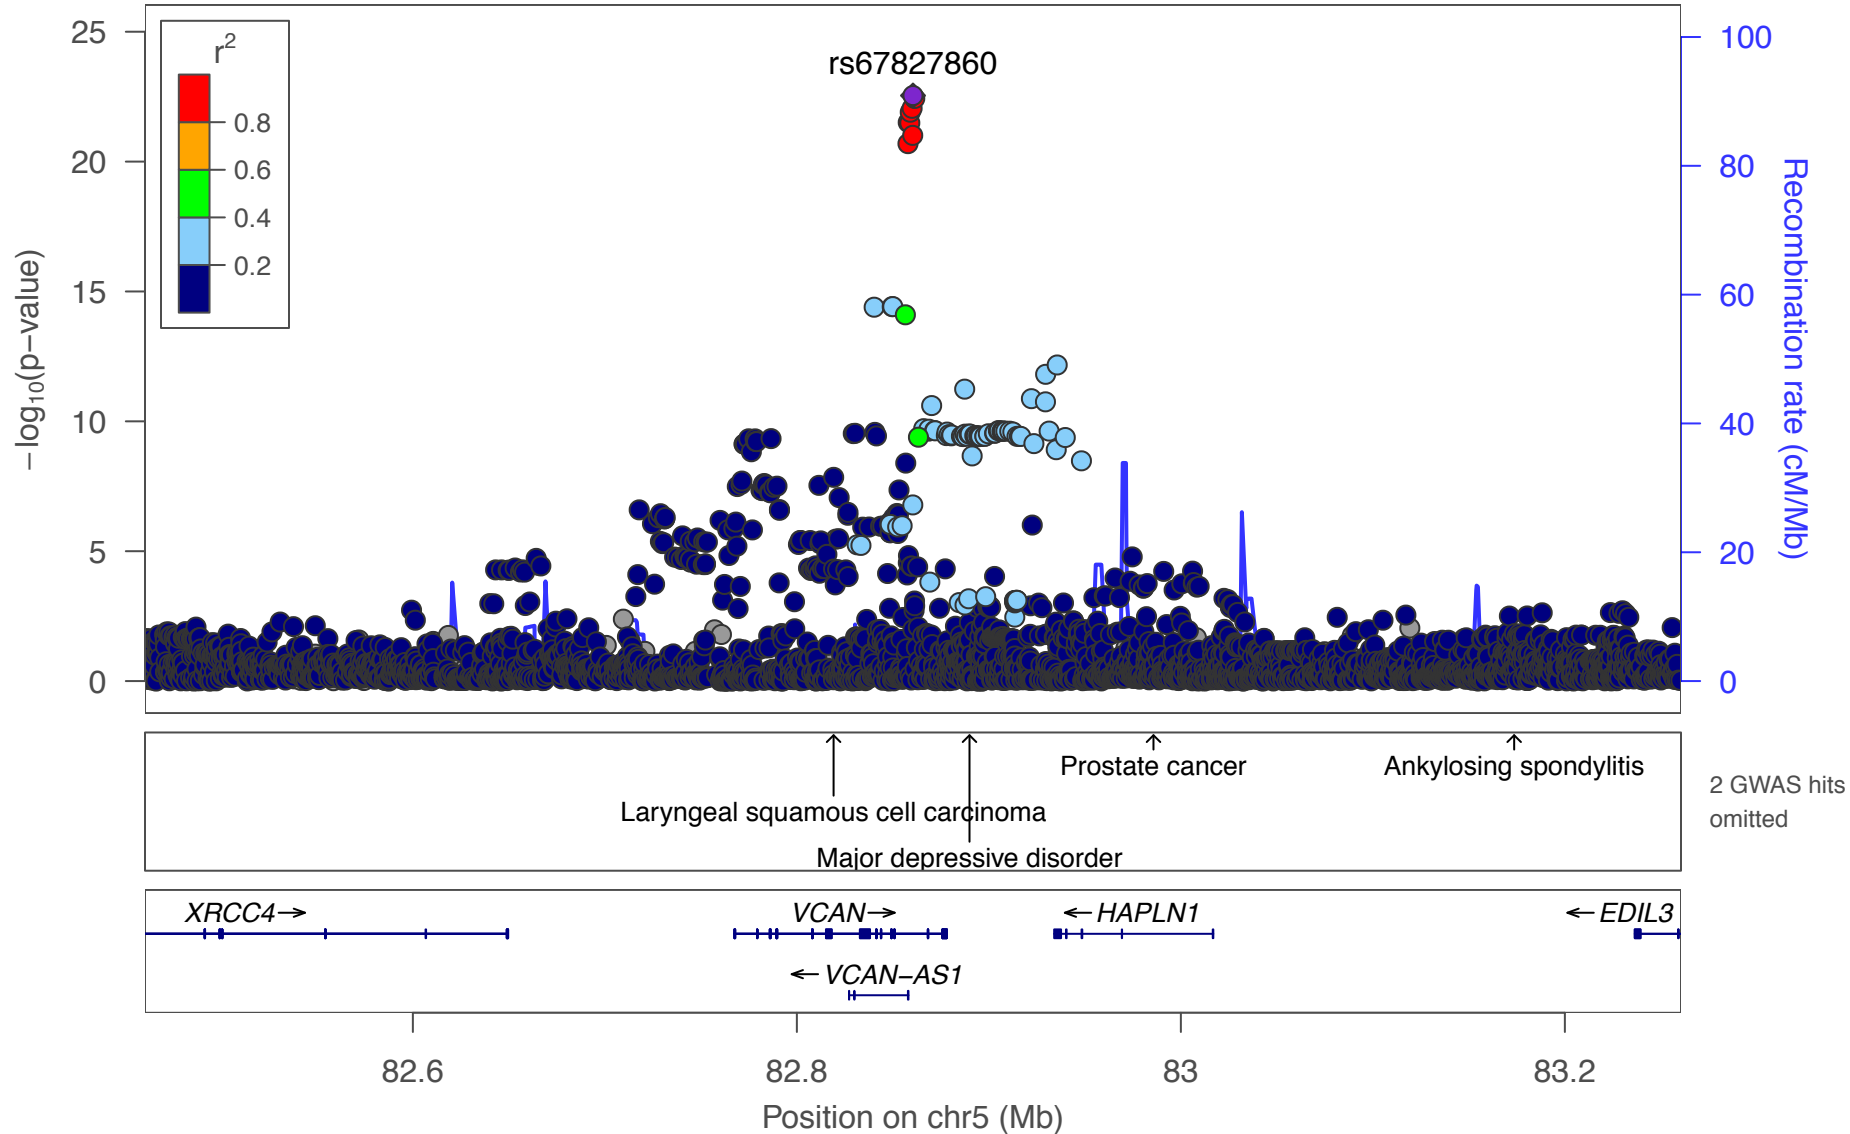

date: Thu Aug 17 17:52:01 2017

build: hg19

display range: chr5:82460485–83260485 [82460485–83260485]

hilite range: 0 – 0 [ 0 – 0 ]

reference SNP: chr5:82860485

number of SNPs plotted: 3393

min P.value: 2.86E–23 [chr5:82860485]

max P.value: 10E–1 [chr5:82466270]

omitted GWAS Hits: NA, NA

## GWAS Catalog SNPs in Region

| <b>chr</b> | <b>pos (Mb)</b> | <b>trait</b>                      | <b>snp</b> |
|------------|-----------------|-----------------------------------|------------|
| 5          | 82.81912        | Laryngeal squamous cell carcinoma | rs310518   |
| 5          | 82.84549        | Diisocyanate-induced asthma       | rs3852186  |
| 5          | 82.88991        | Major depressive disorder         | rs310501   |
| 5          | 82.96073        | Visceral fat                      | rs3846635  |
| 5          | 82.98574        | Prostate cancer                   | rs4466137  |
| 5          | 83.17359        | Ankylosing spondylitis            | rs4552569  |

# TBSS\_ICVF\_Sagittal\_stratum\_R

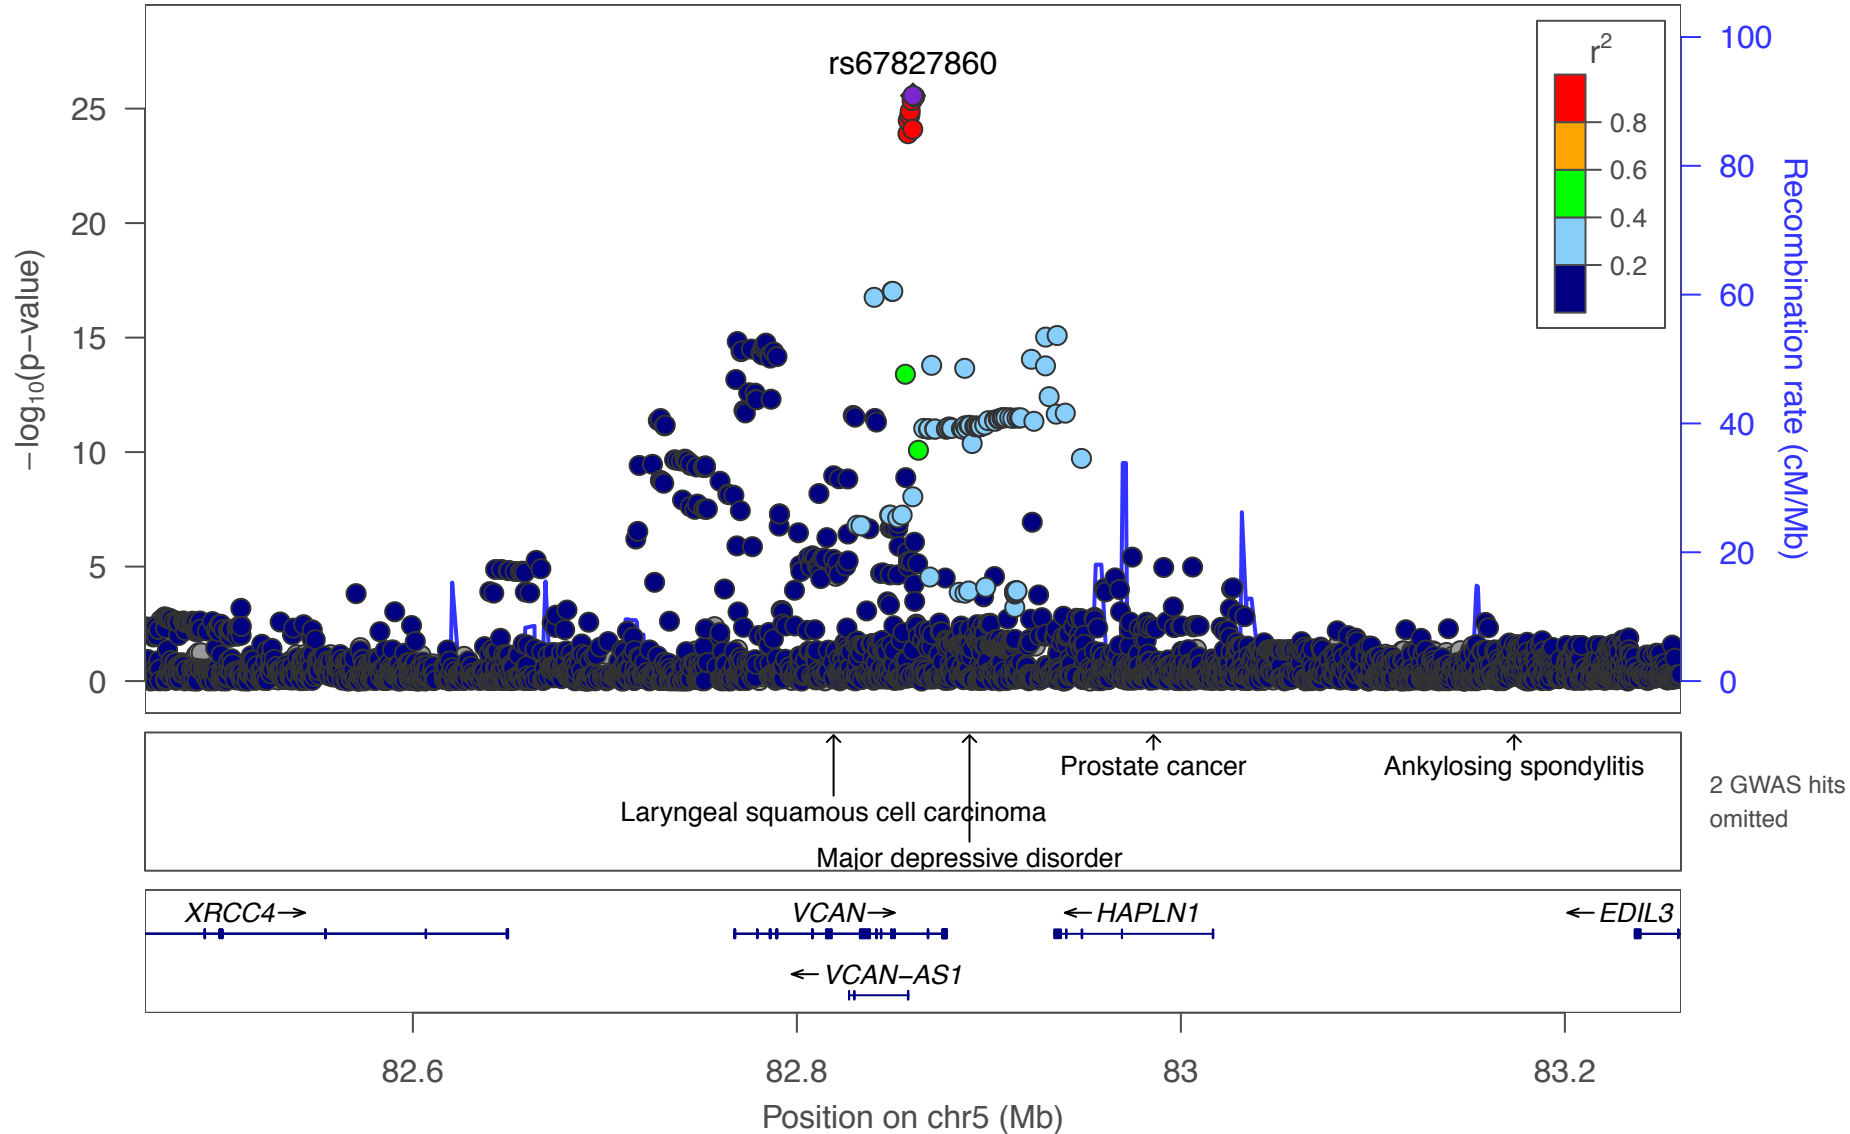

date: Thu Aug 17 17:52:01 2017

build: hg19

display range: chr5:82460485–83260485 [82460485–83260485]

hilite range: 0 – 0 [ 0 – 0 ]

reference SNP: chr5:82860485

number of SNPs plotted: 3393

min P.value: 2.69E–26 [chr5:82860485]

max P.value: 9.99E–1 [chr5:82487589]

omitted GWAS Hits: NA, NA

## GWAS Catalog SNPs in Region

| <b>chr</b> | <b>pos (Mb)</b> | <b>trait</b>                      | <b>snp</b> |
|------------|-----------------|-----------------------------------|------------|
| 5          | 82.81912        | Laryngeal squamous cell carcinoma | rs310518   |
| 5          | 82.84549        | Diisocyanate-induced asthma       | rs3852186  |
| 5          | 82.88991        | Major depressive disorder         | rs310501   |
| 5          | 82.96073        | Visceral fat                      | rs3846635  |
| 5          | 82.98574        | Prostate cancer                   | rs4466137  |
| 5          | 83.17359        | Ankylosing spondylitis            | rs4552569  |

# TBSS\_ICVF\_Fornix\_cres+Stria\_terminalis\_R

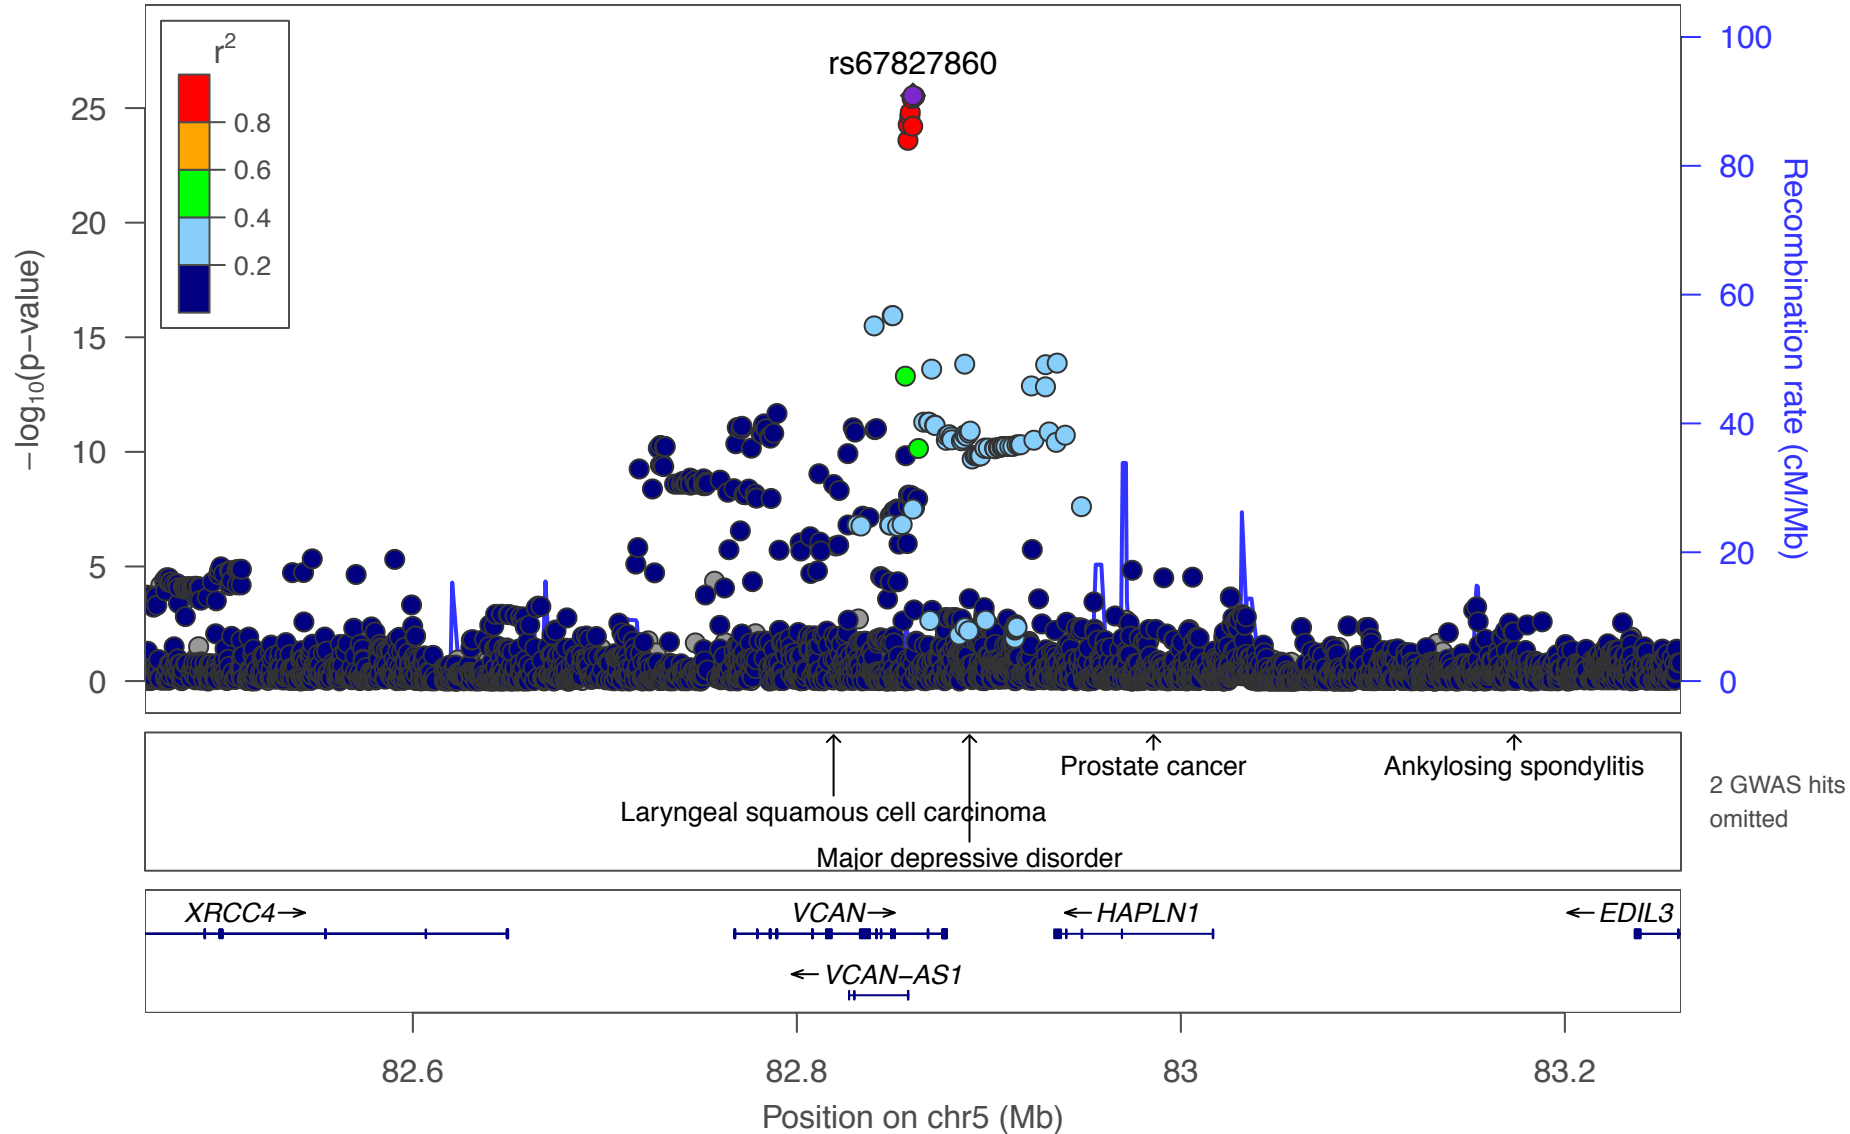

date: Thu Aug 17 17:52:01 2017

build: hg19

display range: chr5:82460485–83260485 [82460485–83260485]

hilite range: 0 – 0 [ 0 – 0 ]

reference SNP: chr5:82860485

number of SNPs plotted: 3393

min P.value: 2.84E–26 [chr5:82860485]

max P.value: 10E–1 [chr5:83056492]

omitted GWAS Hits: NA, NA



## GWAS Catalog SNPs in Region

| <b>chr</b> | <b>pos (Mb)</b> | <b>trait</b>                      | <b>snp</b> |
|------------|-----------------|-----------------------------------|------------|
| 5          | 82.81912        | Laryngeal squamous cell carcinoma | rs310518   |
| 5          | 82.84549        | Diisocyanate-induced asthma       | rs3852186  |
| 5          | 82.88991        | Major depressive disorder         | rs310501   |
| 5          | 82.96073        | Visceral fat                      | rs3846635  |
| 5          | 82.98574        | Prostate cancer                   | rs4466137  |
| 5          | 83.17359        | Ankylosing spondylitis            | rs4552569  |

# TBSS\_ICVF\_Superior\_longitudinal\_fasciculus\_R

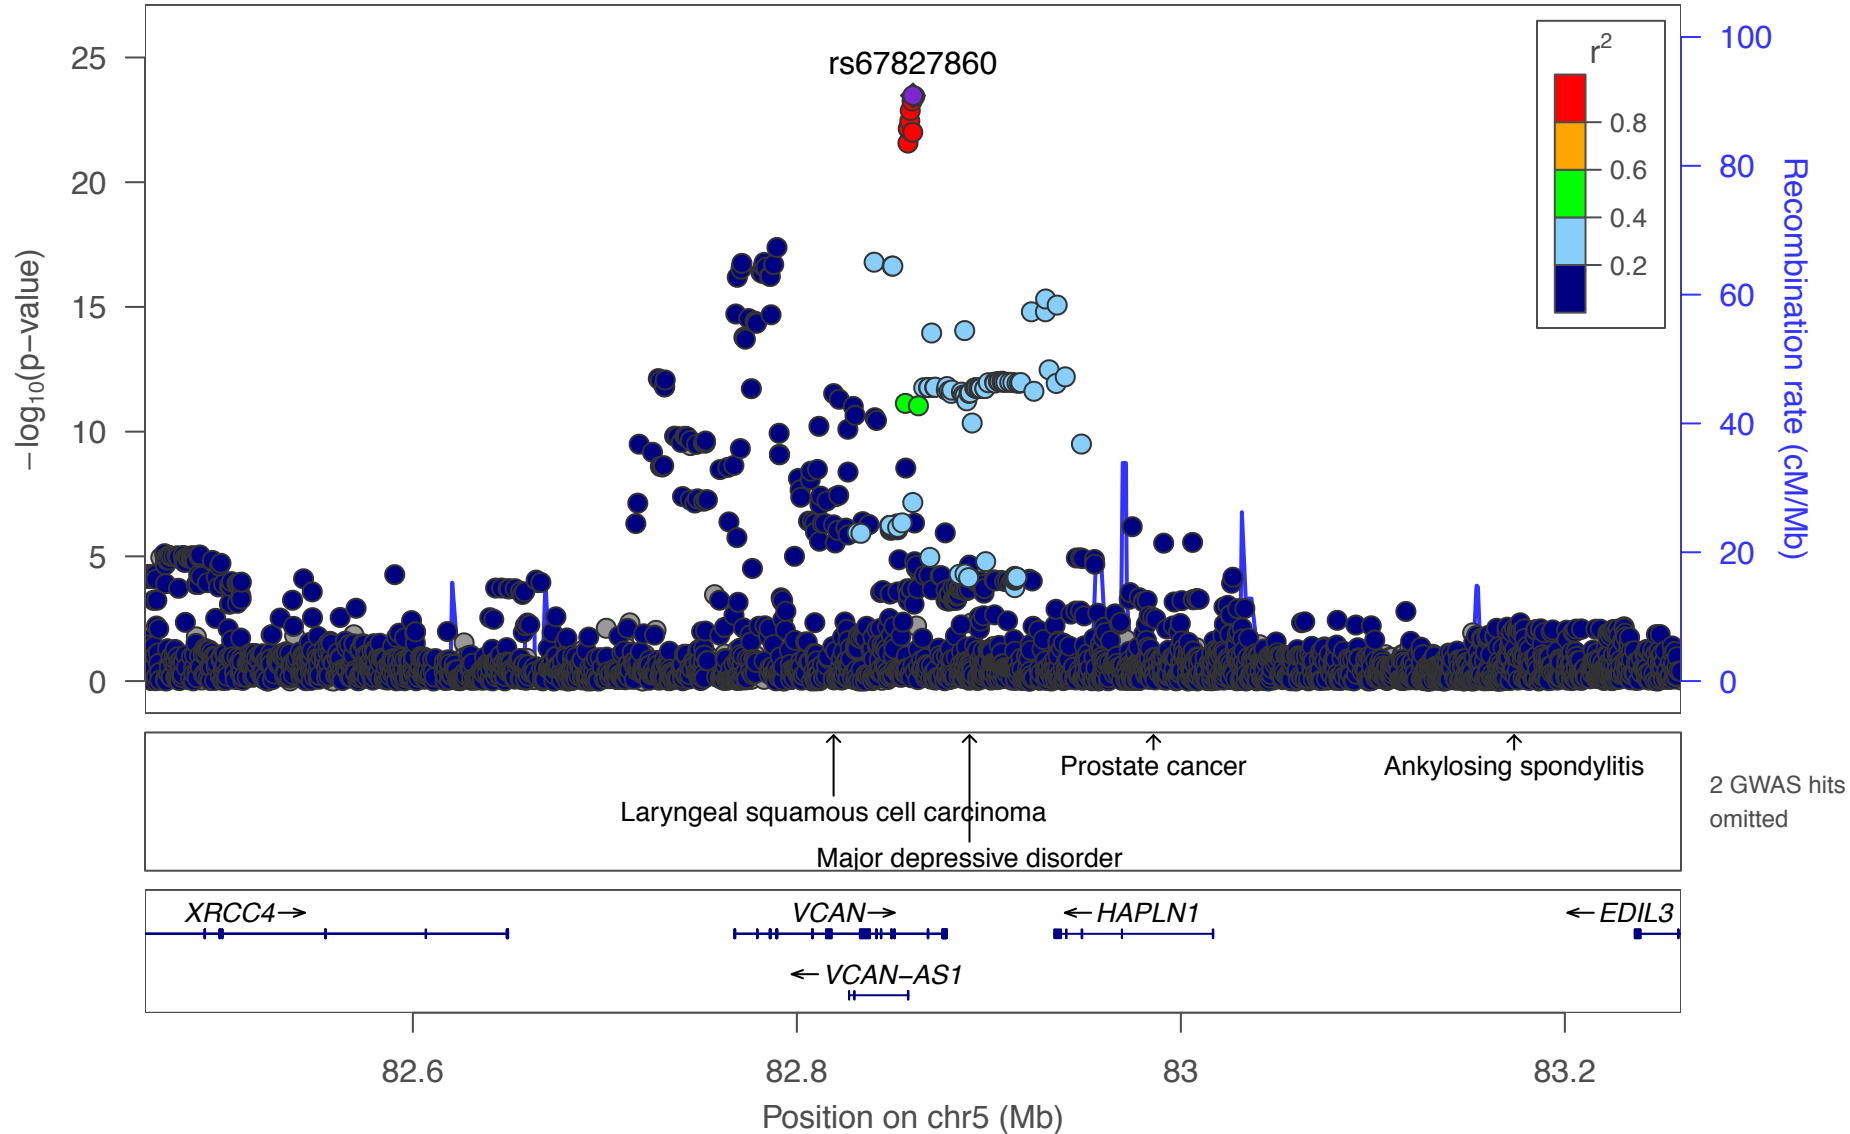

date: Thu Aug 17 17:52:01 2017

build: hg19

display range: chr5:82460485–83260485 [82460485–83260485]

hilite range: 0 – 0 [ 0 – 0 ]

reference SNP: chr5:82860485

number of SNPs plotted: 3393

min P.value: 3.36E–24 [chr5:82860485]

max P.value: 10E–1 [chr5:82921389]

omitted GWAS Hits: NA, NA

## GWAS Catalog SNPs in Region

| <b>chr</b> | <b>pos (Mb)</b> | <b>trait</b>                      | <b>snp</b> |
|------------|-----------------|-----------------------------------|------------|
| 5          | 82.81912        | Laryngeal squamous cell carcinoma | rs310518   |
| 5          | 82.84549        | Diisocyanate-induced asthma       | rs3852186  |
| 5          | 82.88991        | Major depressive disorder         | rs310501   |
| 5          | 82.96073        | Visceral fat                      | rs3846635  |
| 5          | 82.98574        | Prostate cancer                   | rs4466137  |
| 5          | 83.17359        | Ankylosing spondylitis            | rs4552569  |

# TBSS\_ICVF\_Superior\_fronto-occipital\_fasciculus\_L

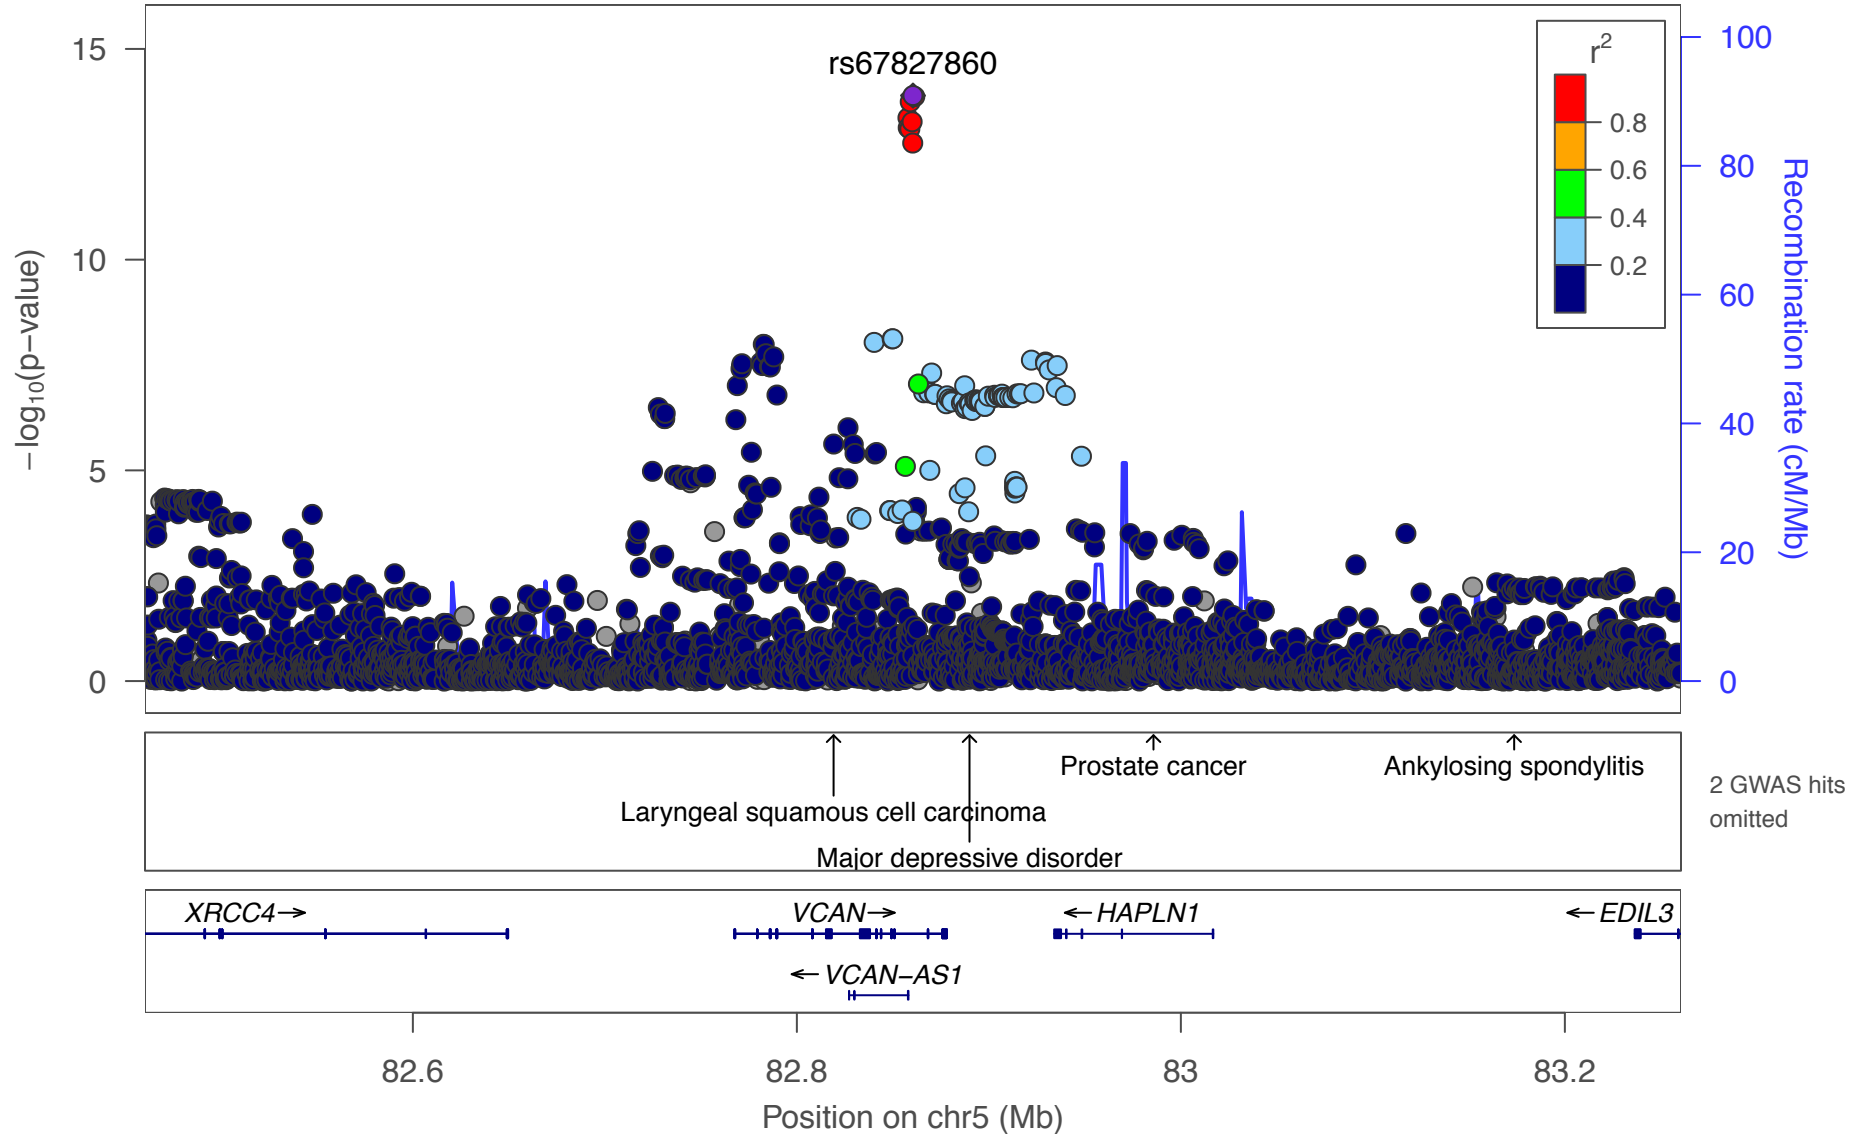

date: Thu Aug 17 17:52:01 2017

build: hg19

display range: chr5:82460485–83260485 [82460485–83260485]

hilite range: 0 – 0 [ 0 – 0 ]

reference SNP: chr5:82860485

number of SNPs plotted: 3393

min P.value: 1.28E–14 [chr5:82860485]

max P.value: 10E–1 [chr5:83117229]

omitted GWAS Hits: NA, NA

## GWAS Catalog SNPs in Region

| <b>chr</b> | <b>pos (Mb)</b> | <b>trait</b>                      | <b>snp</b> |
|------------|-----------------|-----------------------------------|------------|
| 5          | 82.81912        | Laryngeal squamous cell carcinoma | rs310518   |
| 5          | 82.84549        | Diisocyanate-induced asthma       | rs3852186  |
| 5          | 82.88991        | Major depressive disorder         | rs310501   |
| 5          | 82.96073        | Visceral fat                      | rs3846635  |
| 5          | 82.98574        | Prostate cancer                   | rs4466137  |
| 5          | 83.17359        | Ankylosing spondylitis            | rs4552569  |

# ProbtrackX\_FA\_ptr\_I

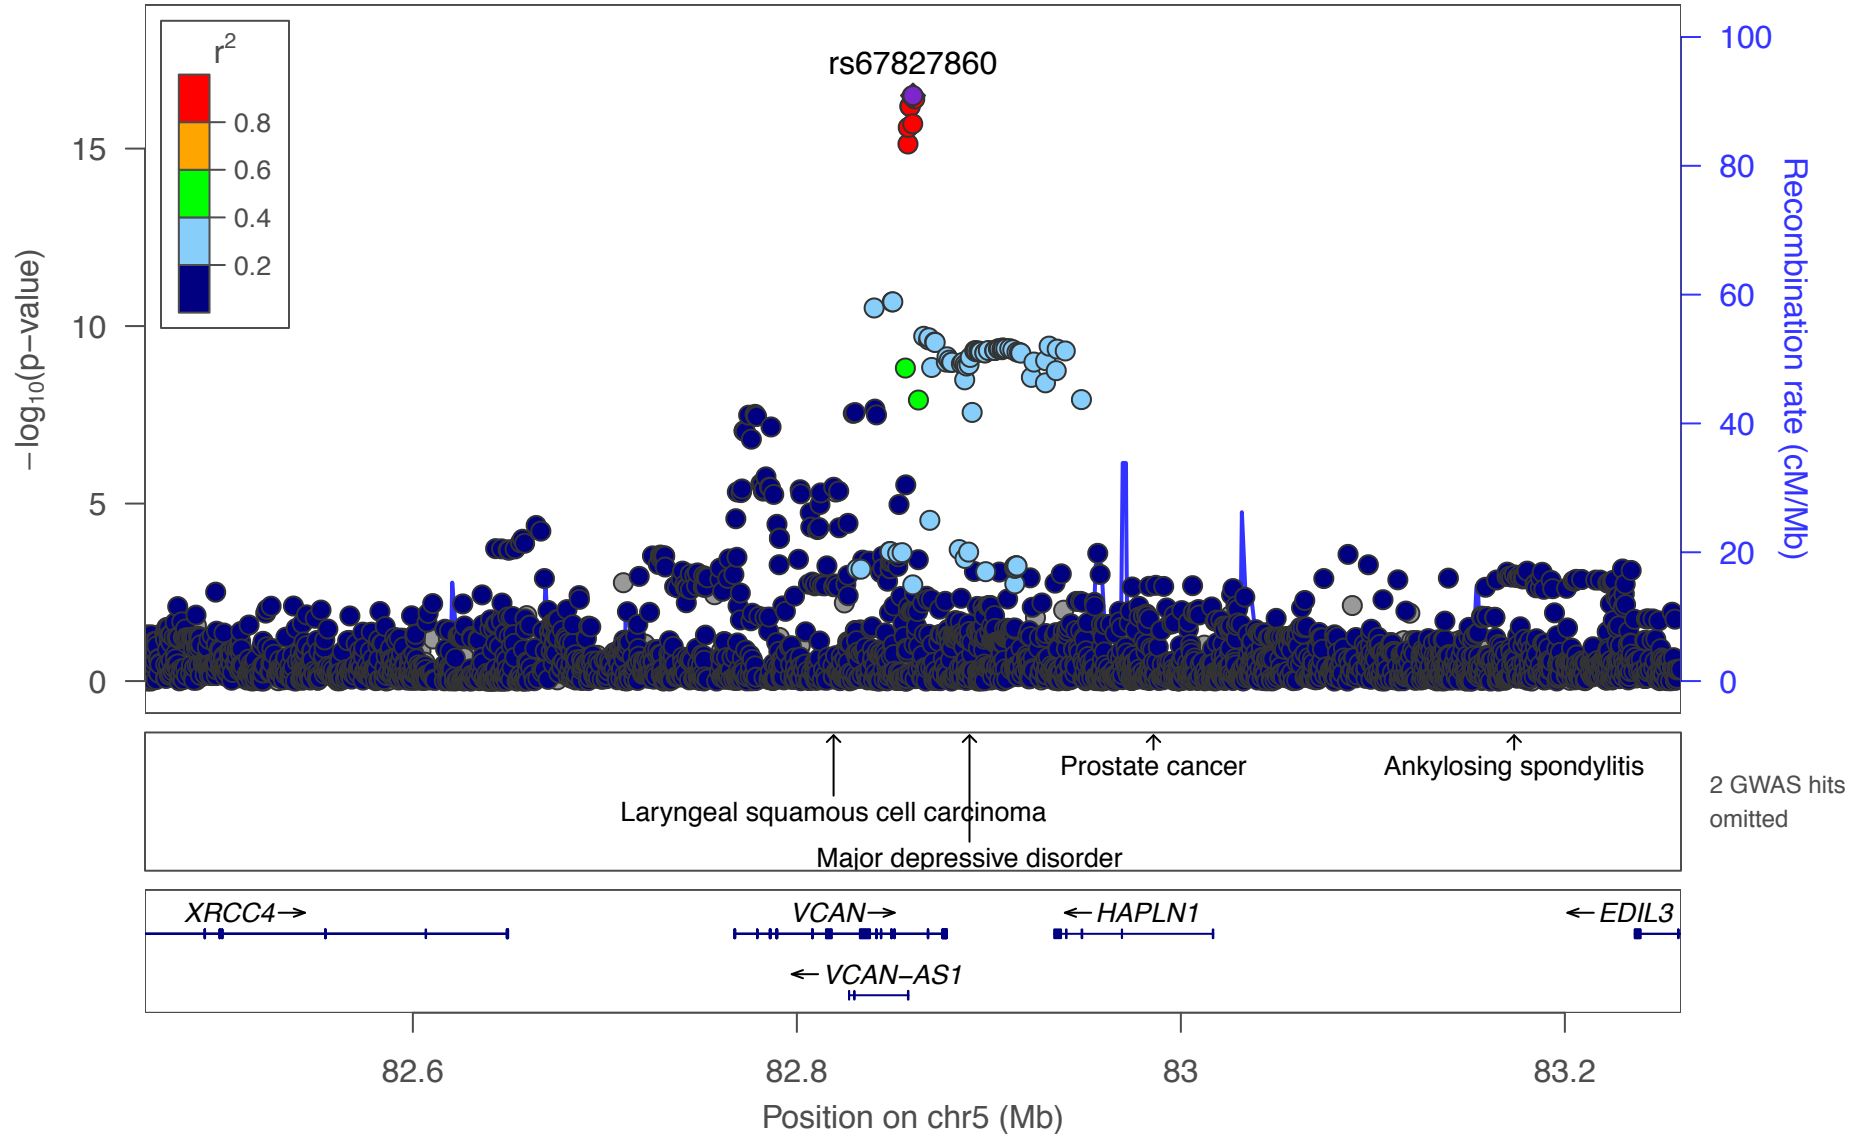



date: Thu Aug 17 17:52:01 2017

build: hg19

display range: chr5:82460485–83260485 [82460485–83260485]

hilite range: 0 – 0 [ 0 – 0 ]

reference SNP: chr5:82860485

number of SNPs plotted: 3393

min P.value: 3.21E–17 [chr5:82860485]

max P.value: 10E–1 [chr5:82867318]

omitted GWAS Hits: NA, NA

## GWAS Catalog SNPs in Region

| <b>chr</b> | <b>pos (Mb)</b> | <b>trait</b>                      | <b>snp</b> |
|------------|-----------------|-----------------------------------|------------|
| 5          | 82.81912        | Laryngeal squamous cell carcinoma | rs310518   |
| 5          | 82.84549        | Diisocyanate-induced asthma       | rs3852186  |
| 5          | 82.88991        | Major depressive disorder         | rs310501   |
| 5          | 82.96073        | Visceral fat                      | rs3846635  |
| 5          | 82.98574        | Prostate cancer                   | rs4466137  |
| 5          | 83.17359        | Ankylosing spondylitis            | rs4552569  |

# ProbtrackX\_MD\_cgc\_r

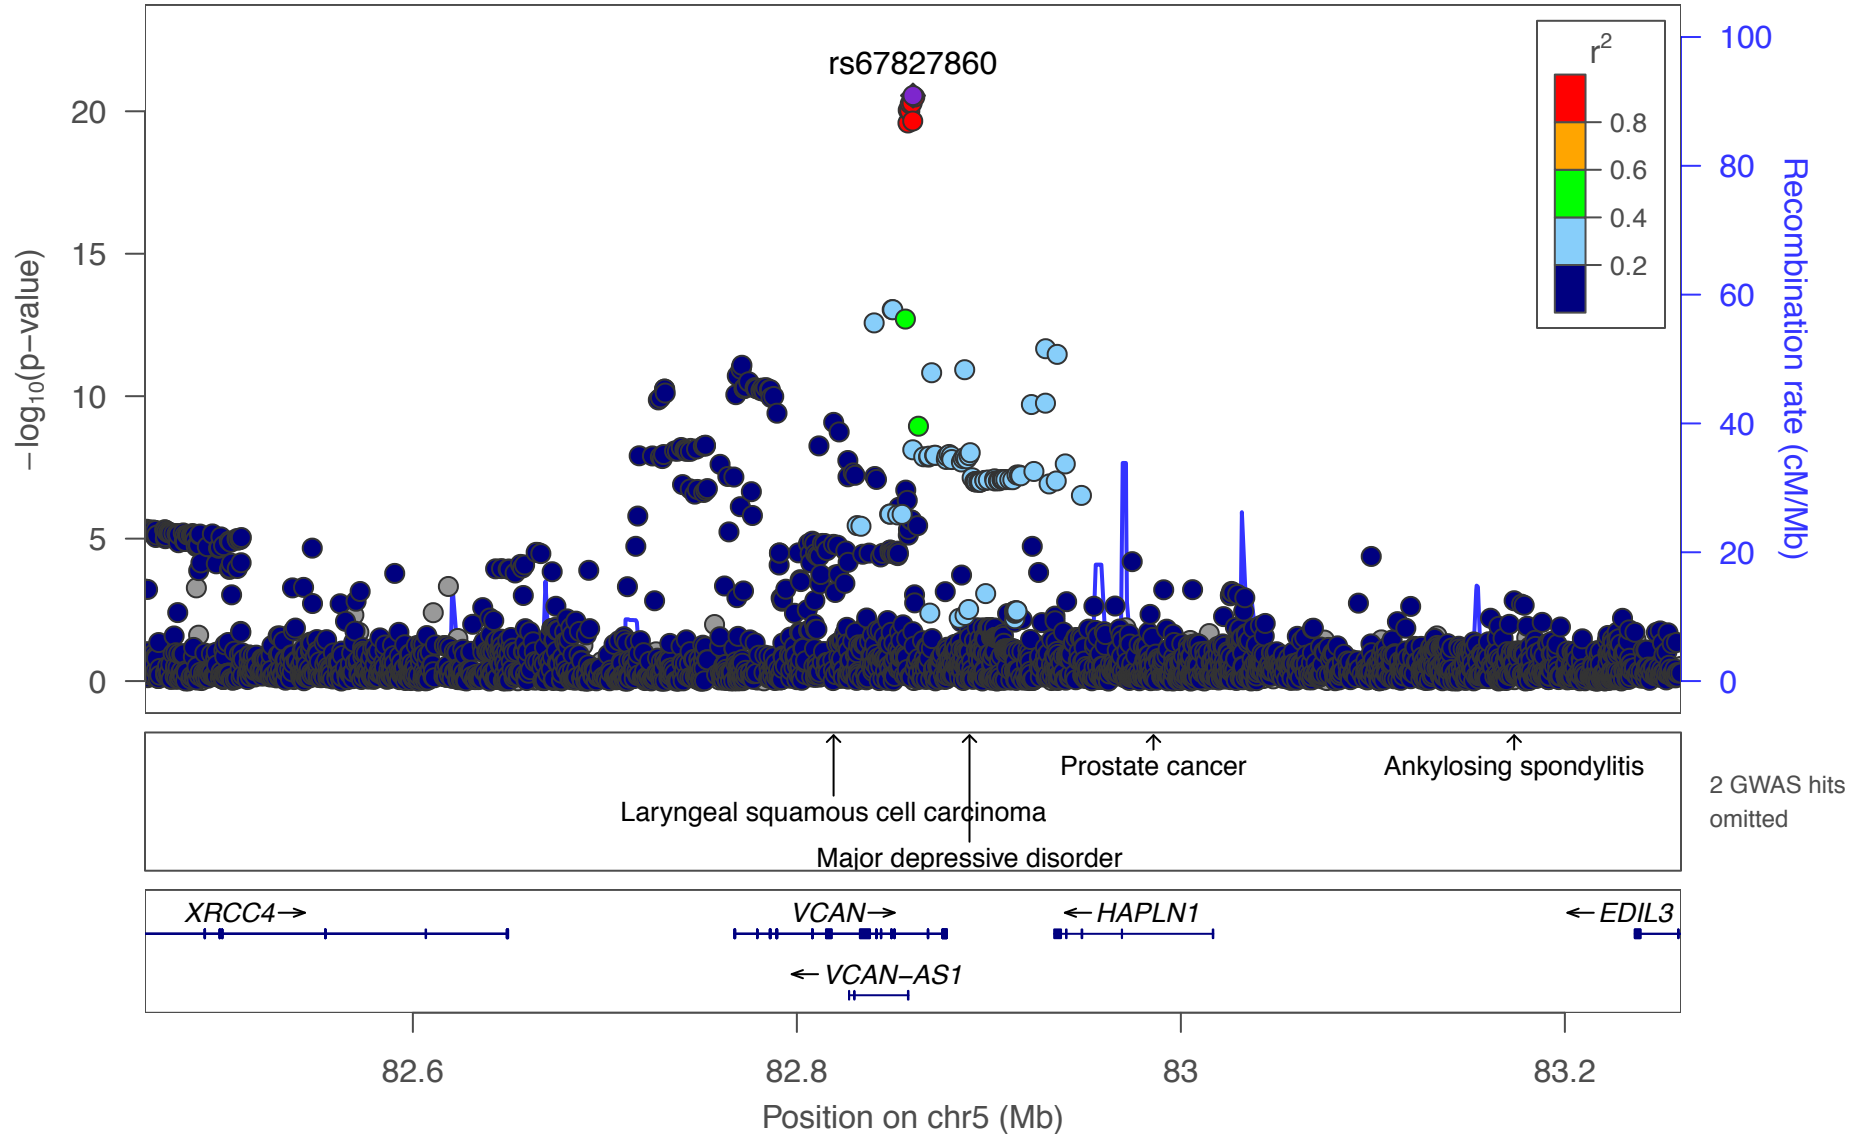

date: Thu Aug 17 17:52:01 2017

build: hg19

display range: chr5:82460485–83260485 [82460485–83260485]

hilite range: 0 – 0 [ 0 – 0 ]

reference SNP: chr5:82860485

number of SNPs plotted: 3393

min P.value: 2.81E–21 [chr5:82860485]

max P.value: 10E–1 [chr5:82750729]

omitted GWAS Hits: NA, NA

## GWAS Catalog SNPs in Region

| <b>chr</b> | <b>pos (Mb)</b> | <b>trait</b>                      | <b>snp</b> |
|------------|-----------------|-----------------------------------|------------|
| 5          | 82.81912        | Laryngeal squamous cell carcinoma | rs310518   |
| 5          | 82.84549        | Diisocyanate-induced asthma       | rs3852186  |
| 5          | 82.88991        | Major depressive disorder         | rs310501   |
| 5          | 82.96073        | Visceral fat                      | rs3846635  |
| 5          | 82.98574        | Prostate cancer                   | rs4466137  |
| 5          | 83.17359        | Ankylosing spondylitis            | rs4552569  |

# ProbtrackX\_MD\_ifo\_I

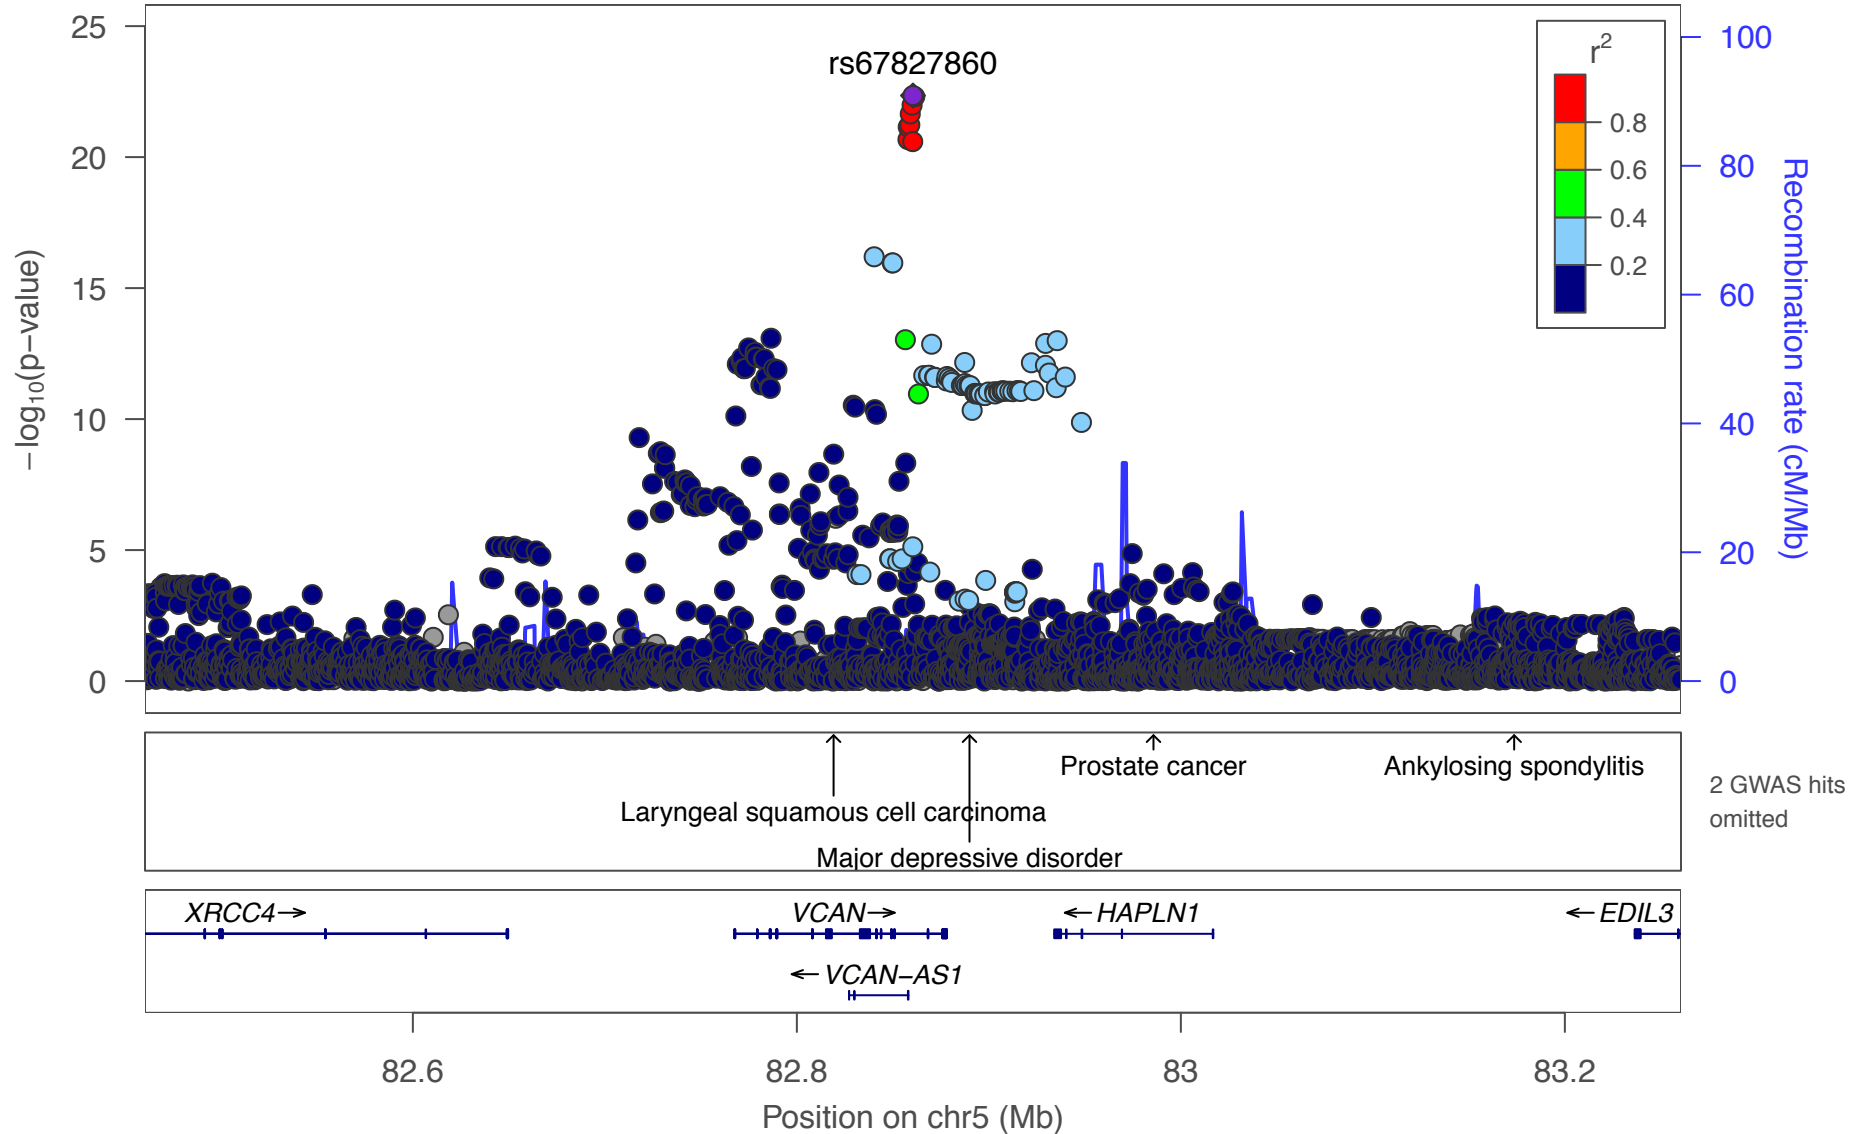

date: Thu Aug 17 17:52:01 2017

build: hg19

display range: chr5:82460485–83260485 [82460485–83260485]

hilite range: 0 – 0 [ 0 – 0 ]

reference SNP: chr5:82860485

number of SNPs plotted: 3393

min P.value: 4.47E–23 [chr5:82860485]

max P.value: 10E–1 [chr5:82609713]

omitted GWAS Hits: NA, NA

## GWAS Catalog SNPs in Region

| <b>chr</b> | <b>pos (Mb)</b> | <b>trait</b>                      | <b>snp</b> |
|------------|-----------------|-----------------------------------|------------|
| 5          | 82.81912        | Laryngeal squamous cell carcinoma | rs310518   |
| 5          | 82.84549        | Diisocyanate-induced asthma       | rs3852186  |
| 5          | 82.88991        | Major depressive disorder         | rs310501   |
| 5          | 82.96073        | Visceral fat                      | rs3846635  |
| 5          | 82.98574        | Prostate cancer                   | rs4466137  |
| 5          | 83.17359        | Ankylosing spondylitis            | rs4552569  |



# ProbtrackX\_MD\_ifo\_r

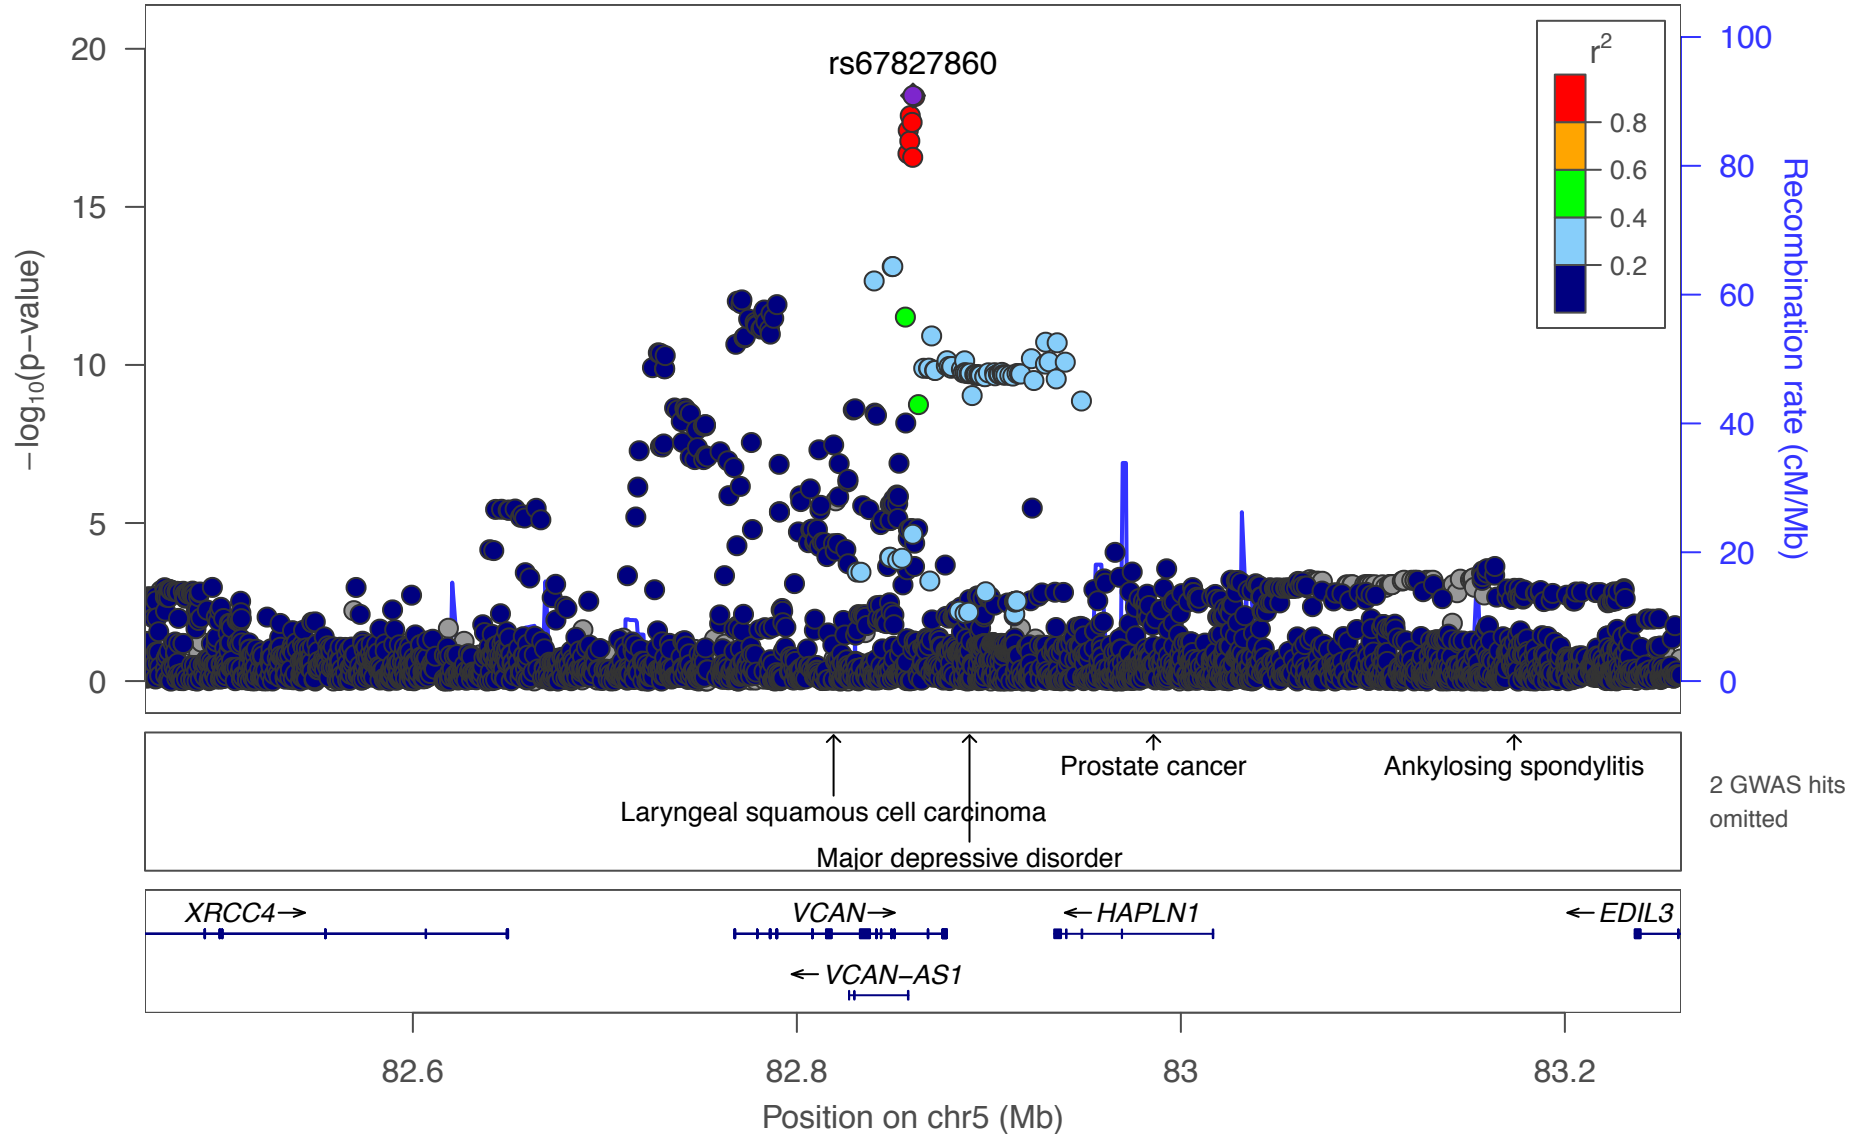

date: Thu Aug 17 17:52:01 2017

build: hg19

display range: chr5:82460485–83260485 [82460485–83260485]

hilite range: 0 – 0 [ 0 – 0 ]

reference SNP: chr5:82860485

number of SNPs plotted: 3393

min P.value: 3.01E–19 [chr5:82860485]

max P.value: 10E–1 [chr5:82923125]

omitted GWAS Hits: NA, NA

## GWAS Catalog SNPs in Region

| <b>chr</b> | <b>pos (Mb)</b> | <b>trait</b>                      | <b>snp</b> |
|------------|-----------------|-----------------------------------|------------|
| 5          | 82.81912        | Laryngeal squamous cell carcinoma | rs310518   |
| 5          | 82.84549        | Diisocyanate-induced asthma       | rs3852186  |
| 5          | 82.88991        | Major depressive disorder         | rs310501   |
| 5          | 82.96073        | Visceral fat                      | rs3846635  |
| 5          | 82.98574        | Prostate cancer                   | rs4466137  |
| 5          | 83.17359        | Ankylosing spondylitis            | rs4552569  |

# ProbtrackX\_MD\_ilf\_I

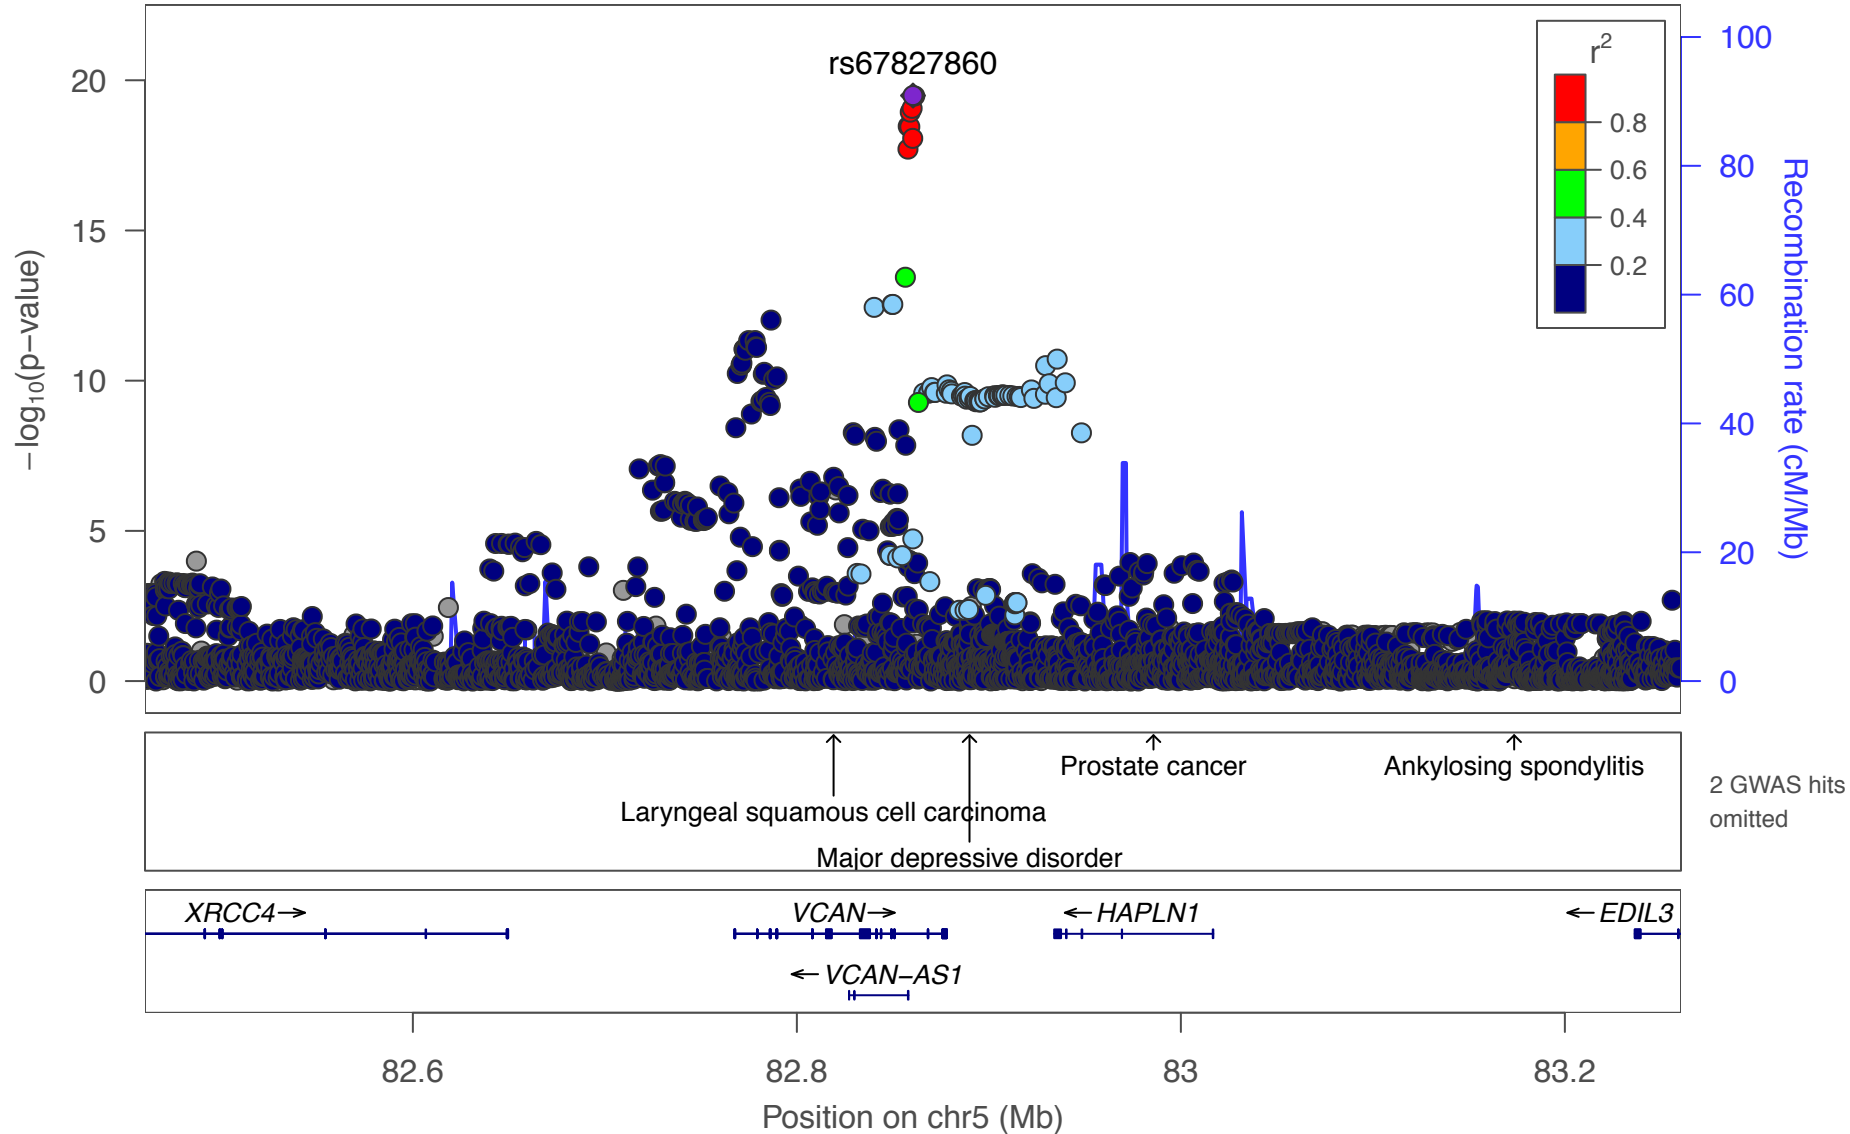

date: Thu Aug 17 17:52:01 2017

build: hg19

display range: chr5:82460485–83260485 [82460485–83260485]

hilite range: 0 – 0 [ 0 – 0 ]

reference SNP: chr5:82860485

number of SNPs plotted: 3393

min P.value: 3.23E–20 [chr5:82860485]

max P.value: 10E–1 [chr5:83083067]

omitted GWAS Hits: NA, NA

## GWAS Catalog SNPs in Region

| <b>chr</b> | <b>pos (Mb)</b> | <b>trait</b>                      | <b>snp</b> |
|------------|-----------------|-----------------------------------|------------|
| 5          | 82.81912        | Laryngeal squamous cell carcinoma | rs310518   |
| 5          | 82.84549        | Diisocyanate-induced asthma       | rs3852186  |
| 5          | 82.88991        | Major depressive disorder         | rs310501   |
| 5          | 82.96073        | Visceral fat                      | rs3846635  |
| 5          | 82.98574        | Prostate cancer                   | rs4466137  |
| 5          | 83.17359        | Ankylosing spondylitis            | rs4552569  |

# ProbtrackX\_MD\_ilf\_r

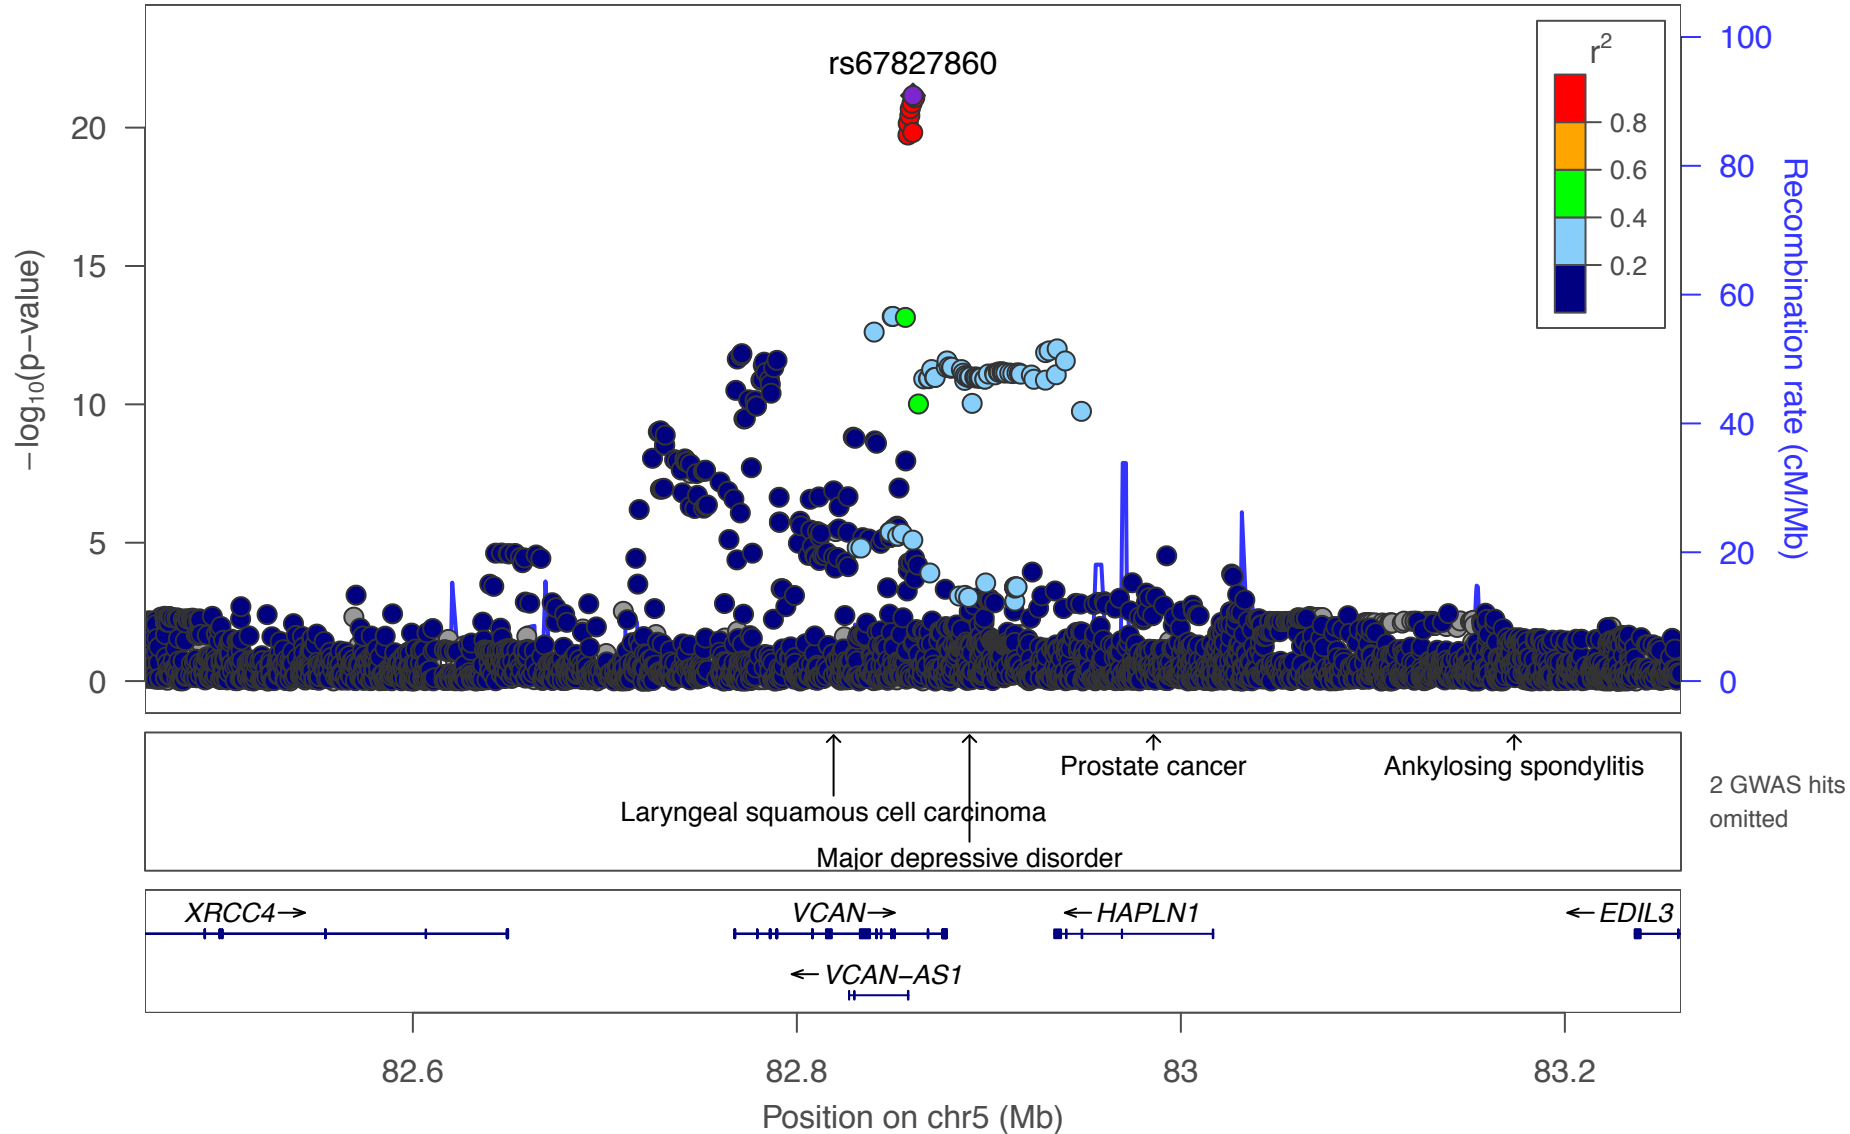

date: Thu Aug 17 17:52:01 2017

build: hg19

display range: chr5:82460485–83260485 [82460485–83260485]

hilite range: 0 – 0 [ 0 – 0 ]

reference SNP: chr5:82860485

number of SNPs plotted: 3393

min P.value: 6.93E–22 [chr5:82860485]

max P.value: 9.99E–1 [chr5:82524547]

omitted GWAS Hits: NA, NA



## GWAS Catalog SNPs in Region

| <b>chr</b> | <b>pos (Mb)</b> | <b>trait</b>                      | <b>snp</b> |
|------------|-----------------|-----------------------------------|------------|
| 5          | 82.81912        | Laryngeal squamous cell carcinoma | rs310518   |
| 5          | 82.84549        | Diisocyanate-induced asthma       | rs3852186  |
| 5          | 82.88991        | Major depressive disorder         | rs310501   |
| 5          | 82.96073        | Visceral fat                      | rs3846635  |
| 5          | 82.98574        | Prostate cancer                   | rs4466137  |
| 5          | 83.17359        | Ankylosing spondylitis            | rs4552569  |

# ProbtrackX\_MD\_slf\_r

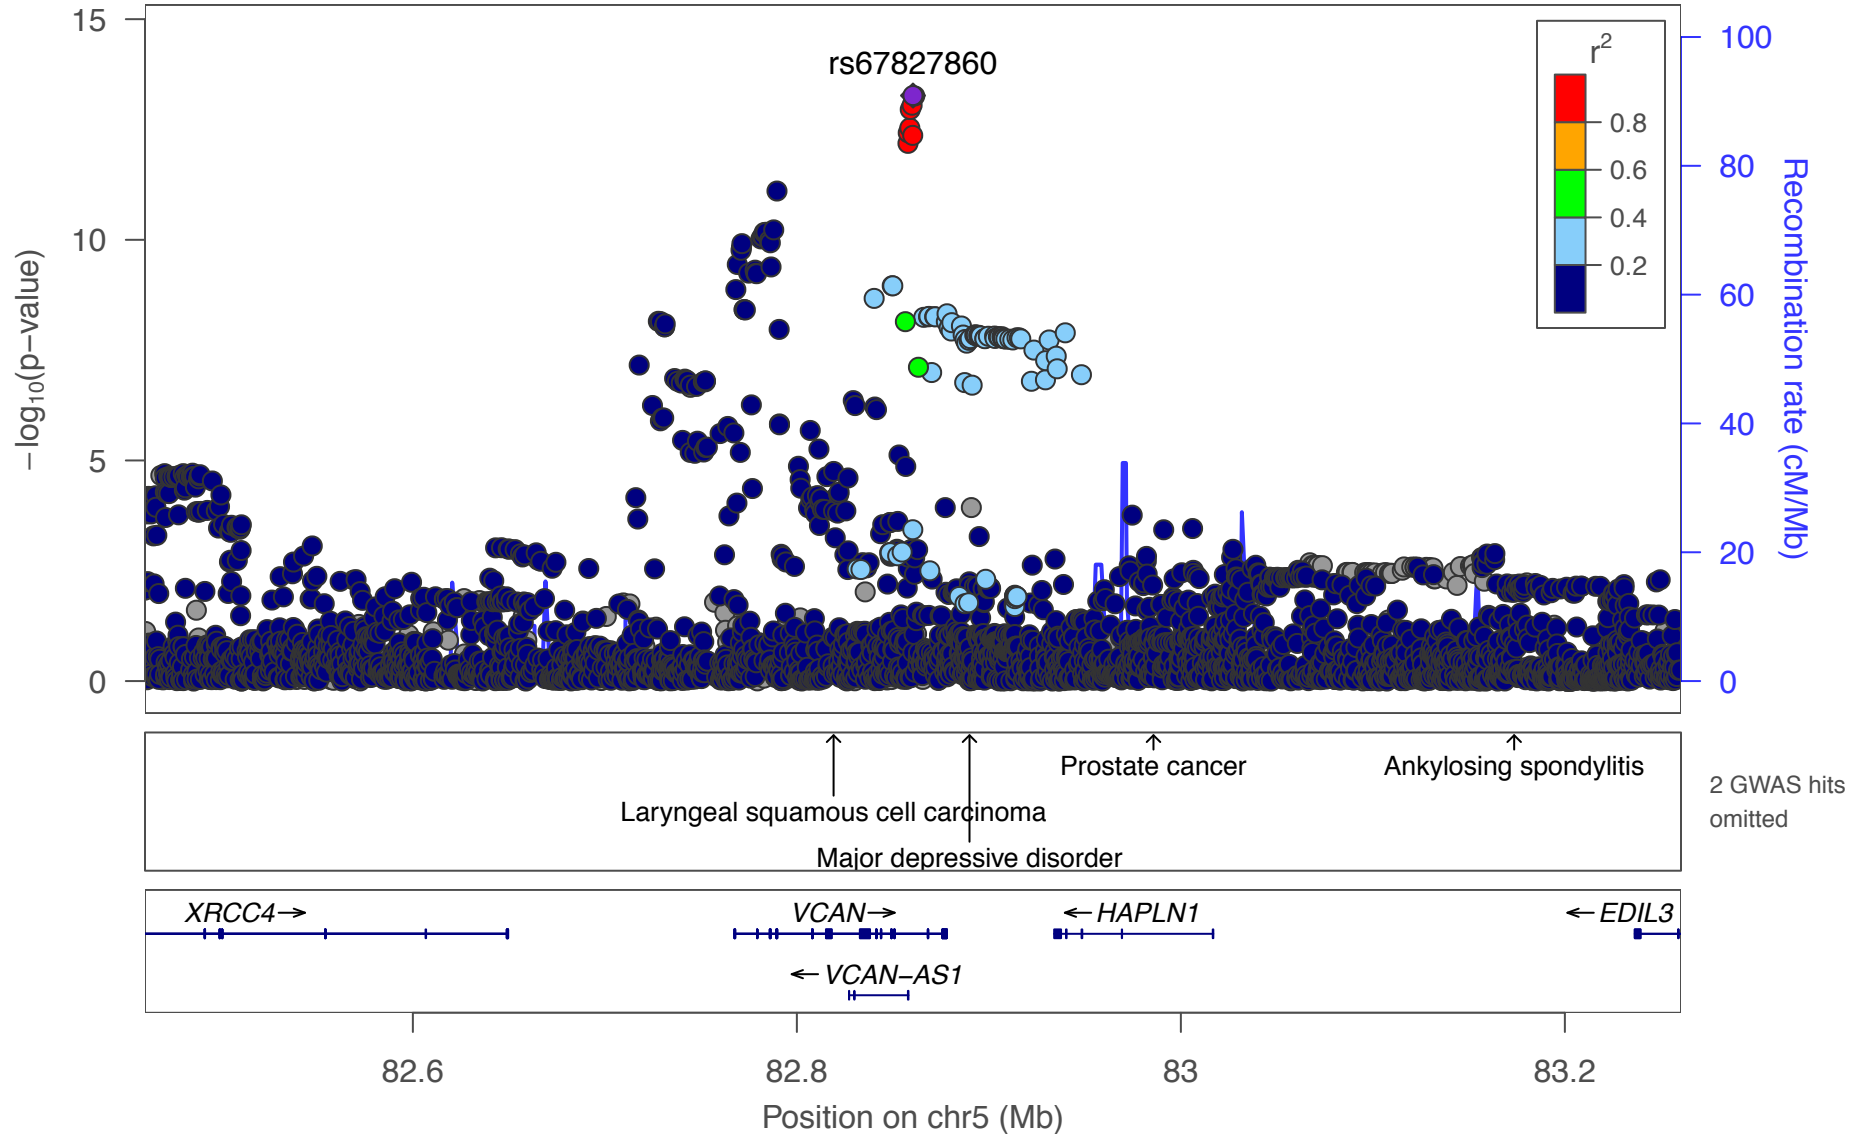

date: Thu Aug 17 17:52:01 2017

build: hg19

display range: chr5:82460485–83260485 [82460485–83260485]

hilite range: 0 – 0 [ 0 – 0 ]

reference SNP: chr5:82860485

number of SNPs plotted: 3393

min P.value: 5.38E–14 [chr5:82860485]

max P.value: 10E–1 [chr5:83201241]

omitted GWAS Hits: NA, NA

## GWAS Catalog SNPs in Region

| <b>chr</b> | <b>pos (Mb)</b> | <b>trait</b>                      | <b>snp</b> |
|------------|-----------------|-----------------------------------|------------|
| 5          | 82.81912        | Laryngeal squamous cell carcinoma | rs310518   |
| 5          | 82.84549        | Diisocyanate-induced asthma       | rs3852186  |
| 5          | 82.88991        | Major depressive disorder         | rs310501   |
| 5          | 82.96073        | Visceral fat                      | rs3846635  |
| 5          | 82.98574        | Prostate cancer                   | rs4466137  |
| 5          | 83.17359        | Ankylosing spondylitis            | rs4552569  |

# ProbtrackX\_L1\_ifo\_I

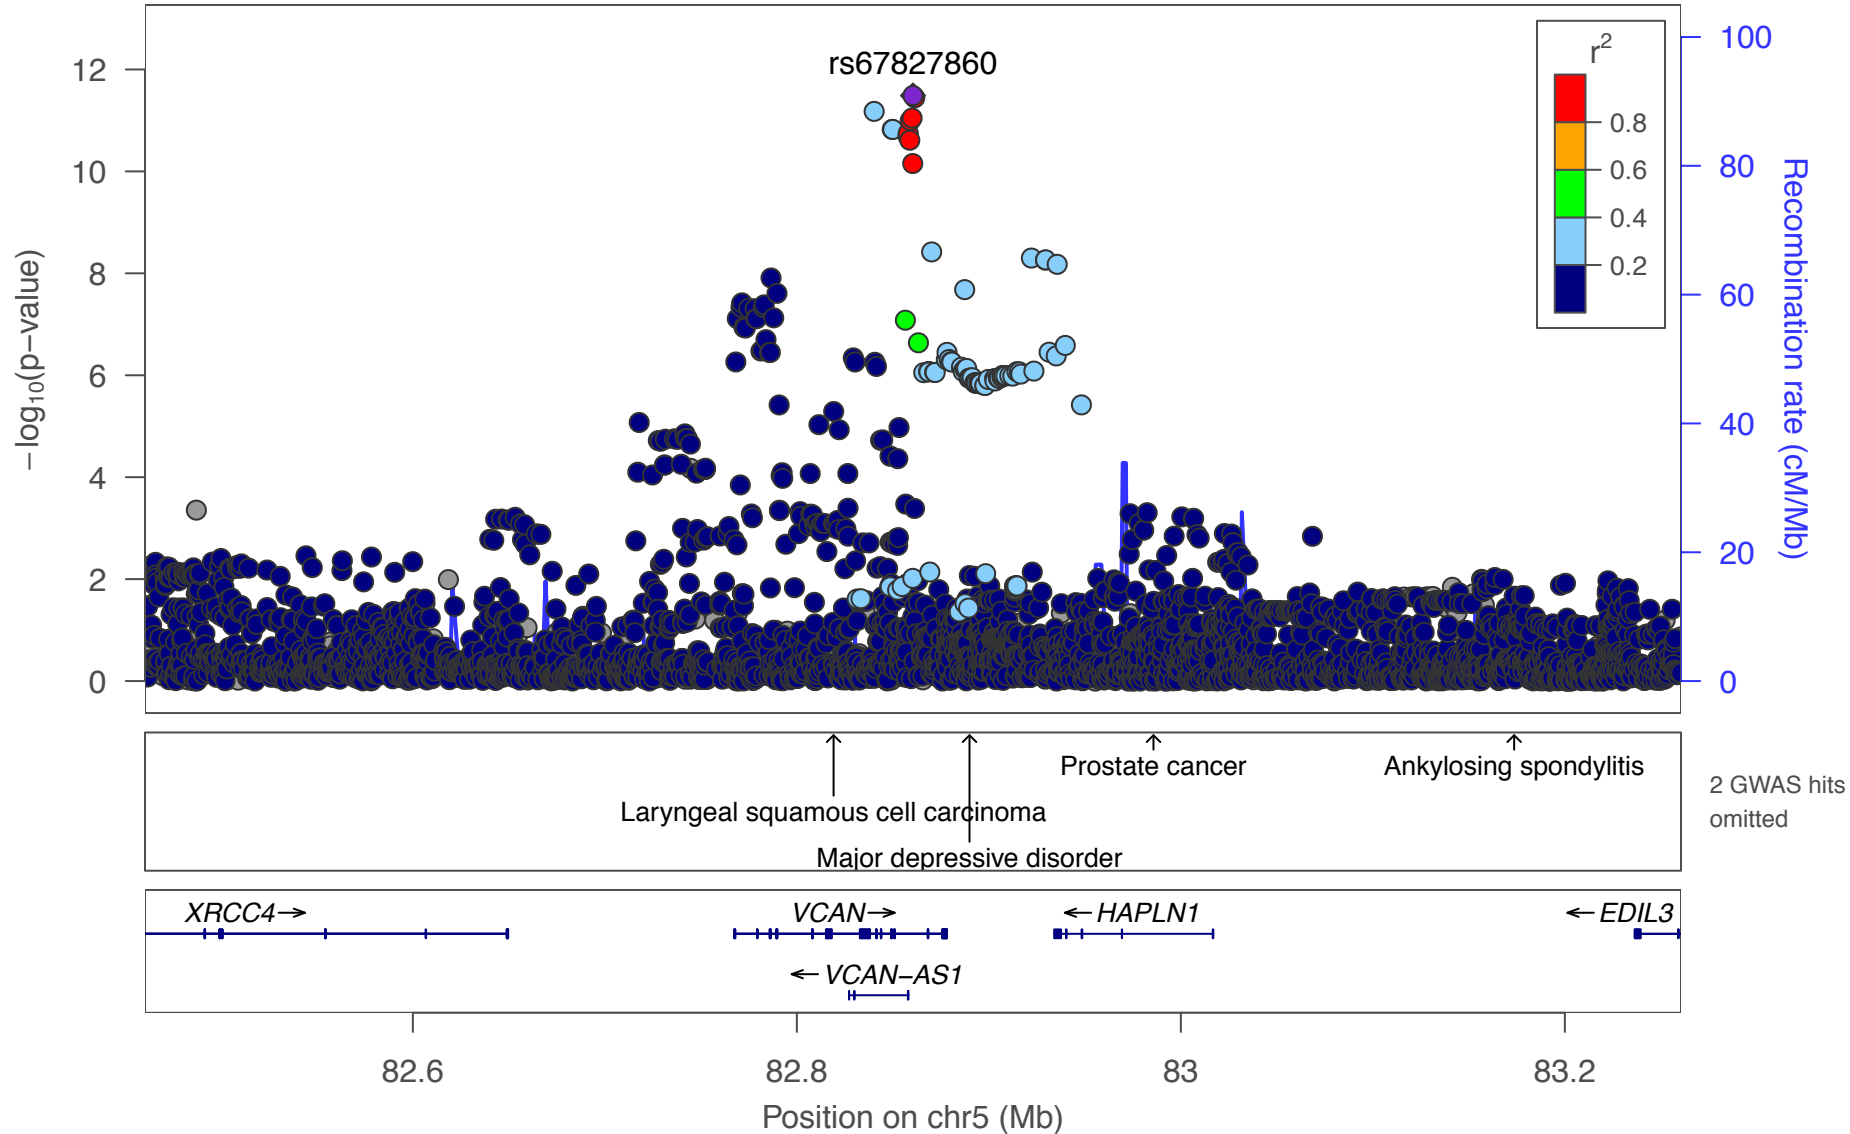

date: Thu Aug 17 17:52:01 2017

build: hg19

display range: chr5:82460485–83260485 [82460485–83260485]

hilite range: 0 – 0 [ 0 – 0 ]

reference SNP: chr5:82860485

number of SNPs plotted: 3393

min P.value: 3.25E–12 [chr5:82860485]

max P.value: 10E–1 [chr5:83192371]

omitted GWAS Hits: NA, NA

## GWAS Catalog SNPs in Region

| <b>chr</b> | <b>pos (Mb)</b> | <b>trait</b>                      | <b>snp</b> |
|------------|-----------------|-----------------------------------|------------|
| 5          | 82.81912        | Laryngeal squamous cell carcinoma | rs310518   |
| 5          | 82.84549        | Diisocyanate-induced asthma       | rs3852186  |
| 5          | 82.88991        | Major depressive disorder         | rs310501   |
| 5          | 82.96073        | Visceral fat                      | rs3846635  |
| 5          | 82.98574        | Prostate cancer                   | rs4466137  |
| 5          | 83.17359        | Ankylosing spondylitis            | rs4552569  |

# ProtrackX\_L1\_ilf\_r

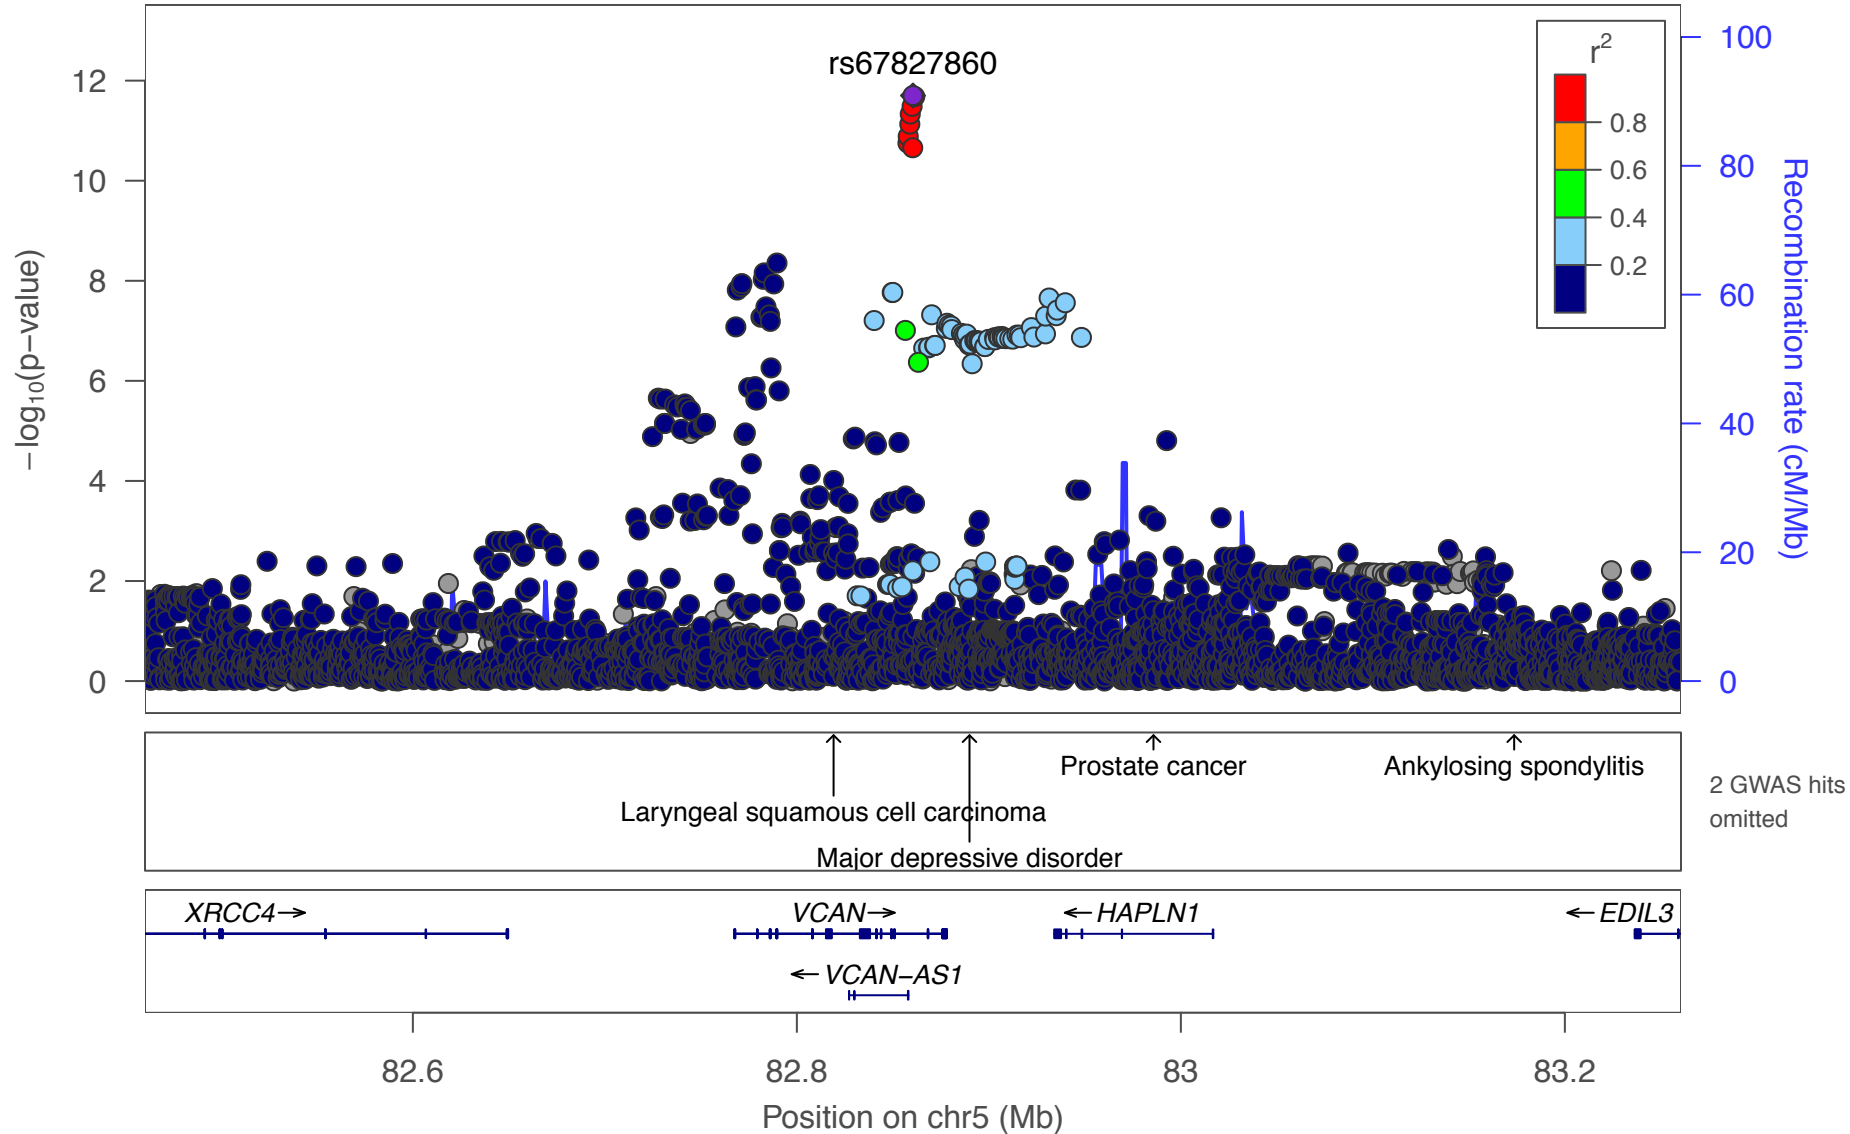



date: Thu Aug 17 17:52:01 2017

build: hg19

display range: chr5:82460485–83260485 [82460485–83260485]

hilite range: 0 – 0 [ 0 – 0 ]

reference SNP: chr5:82860485

number of SNPs plotted: 3393

min P.value: 1.99E–12 [chr5:82860485]

max P.value: 10E–1 [chr5:83204134]

omitted GWAS Hits: NA, NA

## GWAS Catalog SNPs in Region

| <b>chr</b> | <b>pos (Mb)</b> | <b>trait</b>                      | <b>snp</b> |
|------------|-----------------|-----------------------------------|------------|
| 5          | 82.81912        | Laryngeal squamous cell carcinoma | rs310518   |
| 5          | 82.84549        | Diisocyanate-induced asthma       | rs3852186  |
| 5          | 82.88991        | Major depressive disorder         | rs310501   |
| 5          | 82.96073        | Visceral fat                      | rs3846635  |
| 5          | 82.98574        | Prostate cancer                   | rs4466137  |
| 5          | 83.17359        | Ankylosing spondylitis            | rs4552569  |

# ProbtrackX\_L1\_unc\_r

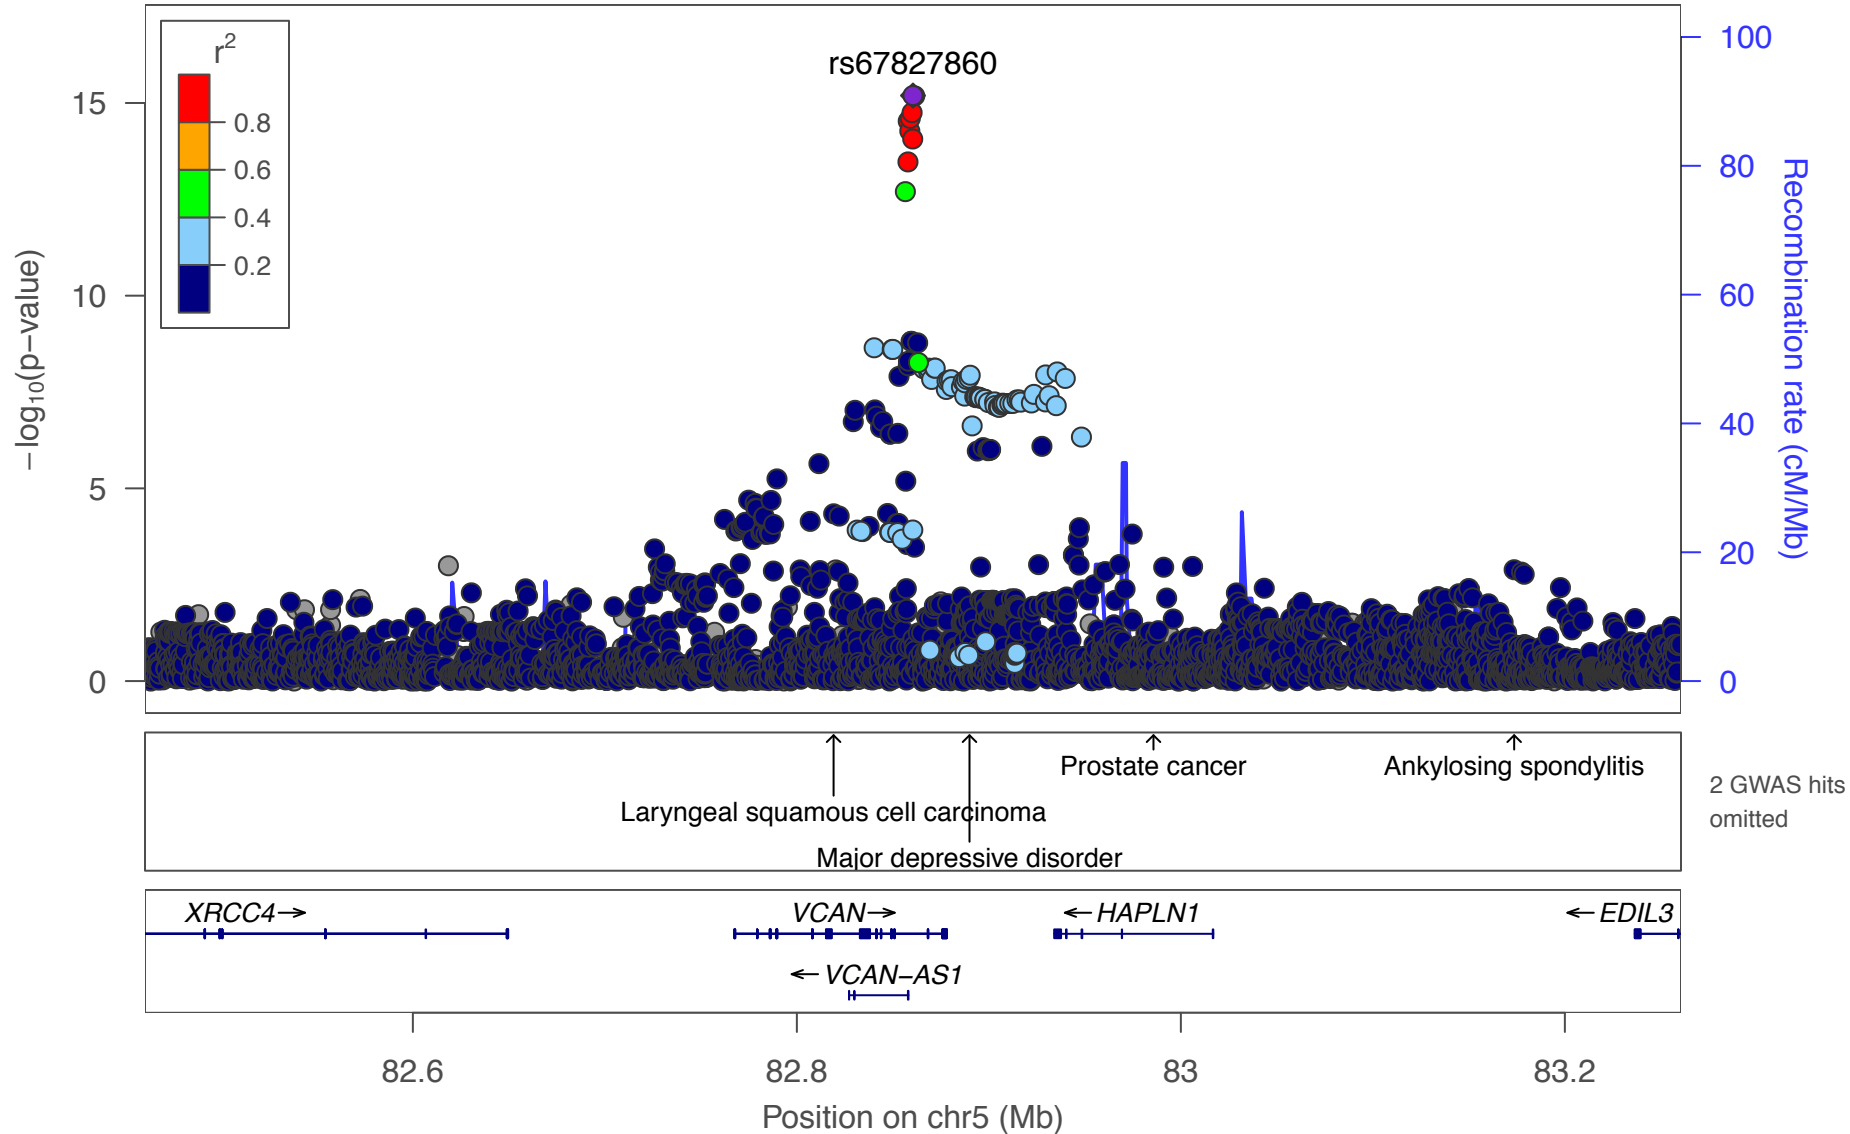

date: Thu Aug 17 17:52:01 2017

build: hg19

display range: chr5:82460485–83260485 [82460485–83260485]

hilite range: 0 – 0 [ 0 – 0 ]

reference SNP: chr5:82860485

number of SNPs plotted: 3393

min P.value: 6.41E–16 [chr5:82860485]

max P.value: 10E–1 [chr5:83052198]

omitted GWAS Hits: NA, NA

## GWAS Catalog SNPs in Region

| <b>chr</b> | <b>pos (Mb)</b> | <b>trait</b>                      | <b>snp</b> |
|------------|-----------------|-----------------------------------|------------|
| 5          | 82.81912        | Laryngeal squamous cell carcinoma | rs310518   |
| 5          | 82.84549        | Diisocyanate-induced asthma       | rs3852186  |
| 5          | 82.88991        | Major depressive disorder         | rs310501   |
| 5          | 82.96073        | Visceral fat                      | rs3846635  |
| 5          | 82.98574        | Prostate cancer                   | rs4466137  |
| 5          | 83.17359        | Ankylosing spondylitis            | rs4552569  |

# ProbtrackX\_L2\_cgc\_I

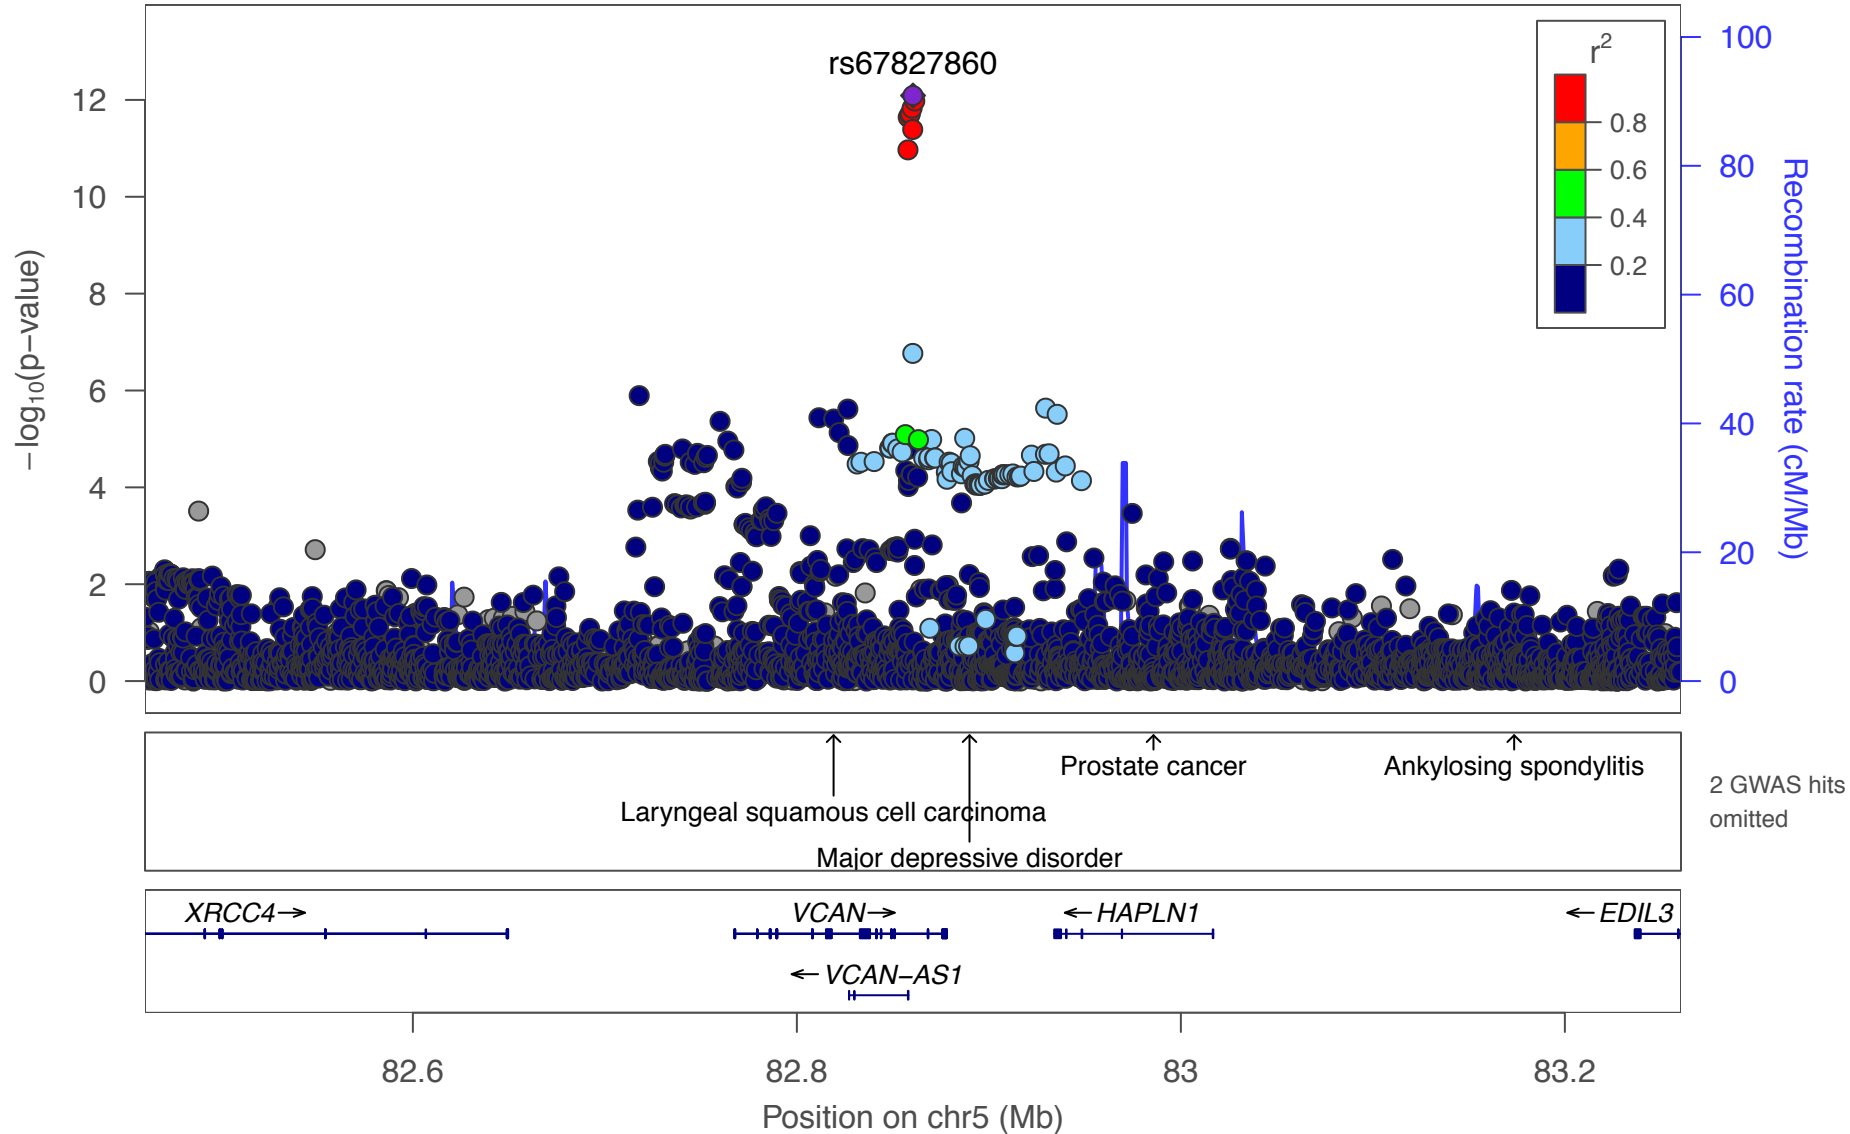

date: Thu Aug 17 17:52:01 2017

build: hg19

display range: chr5:82460485–83260485 [82460485–83260485]

hilite range: 0 – 0 [ 0 – 0 ]

reference SNP: chr5:82860485

number of SNPs plotted: 3393

min P.value: 8.13E–13 [chr5:82860485]

max P.value: 10E–1 [chr5:82616725]

omitted GWAS Hits: NA, NA

## GWAS Catalog SNPs in Region

| <b>chr</b> | <b>pos (Mb)</b> | <b>trait</b>                      | <b>snp</b> |
|------------|-----------------|-----------------------------------|------------|
| 5          | 82.81912        | Laryngeal squamous cell carcinoma | rs310518   |
| 5          | 82.84549        | Diisocyanate-induced asthma       | rs3852186  |
| 5          | 82.88991        | Major depressive disorder         | rs310501   |
| 5          | 82.96073        | Visceral fat                      | rs3846635  |
| 5          | 82.98574        | Prostate cancer                   | rs4466137  |
| 5          | 83.17359        | Ankylosing spondylitis            | rs4552569  |



# ProbtrackX\_L2\_cgc\_r

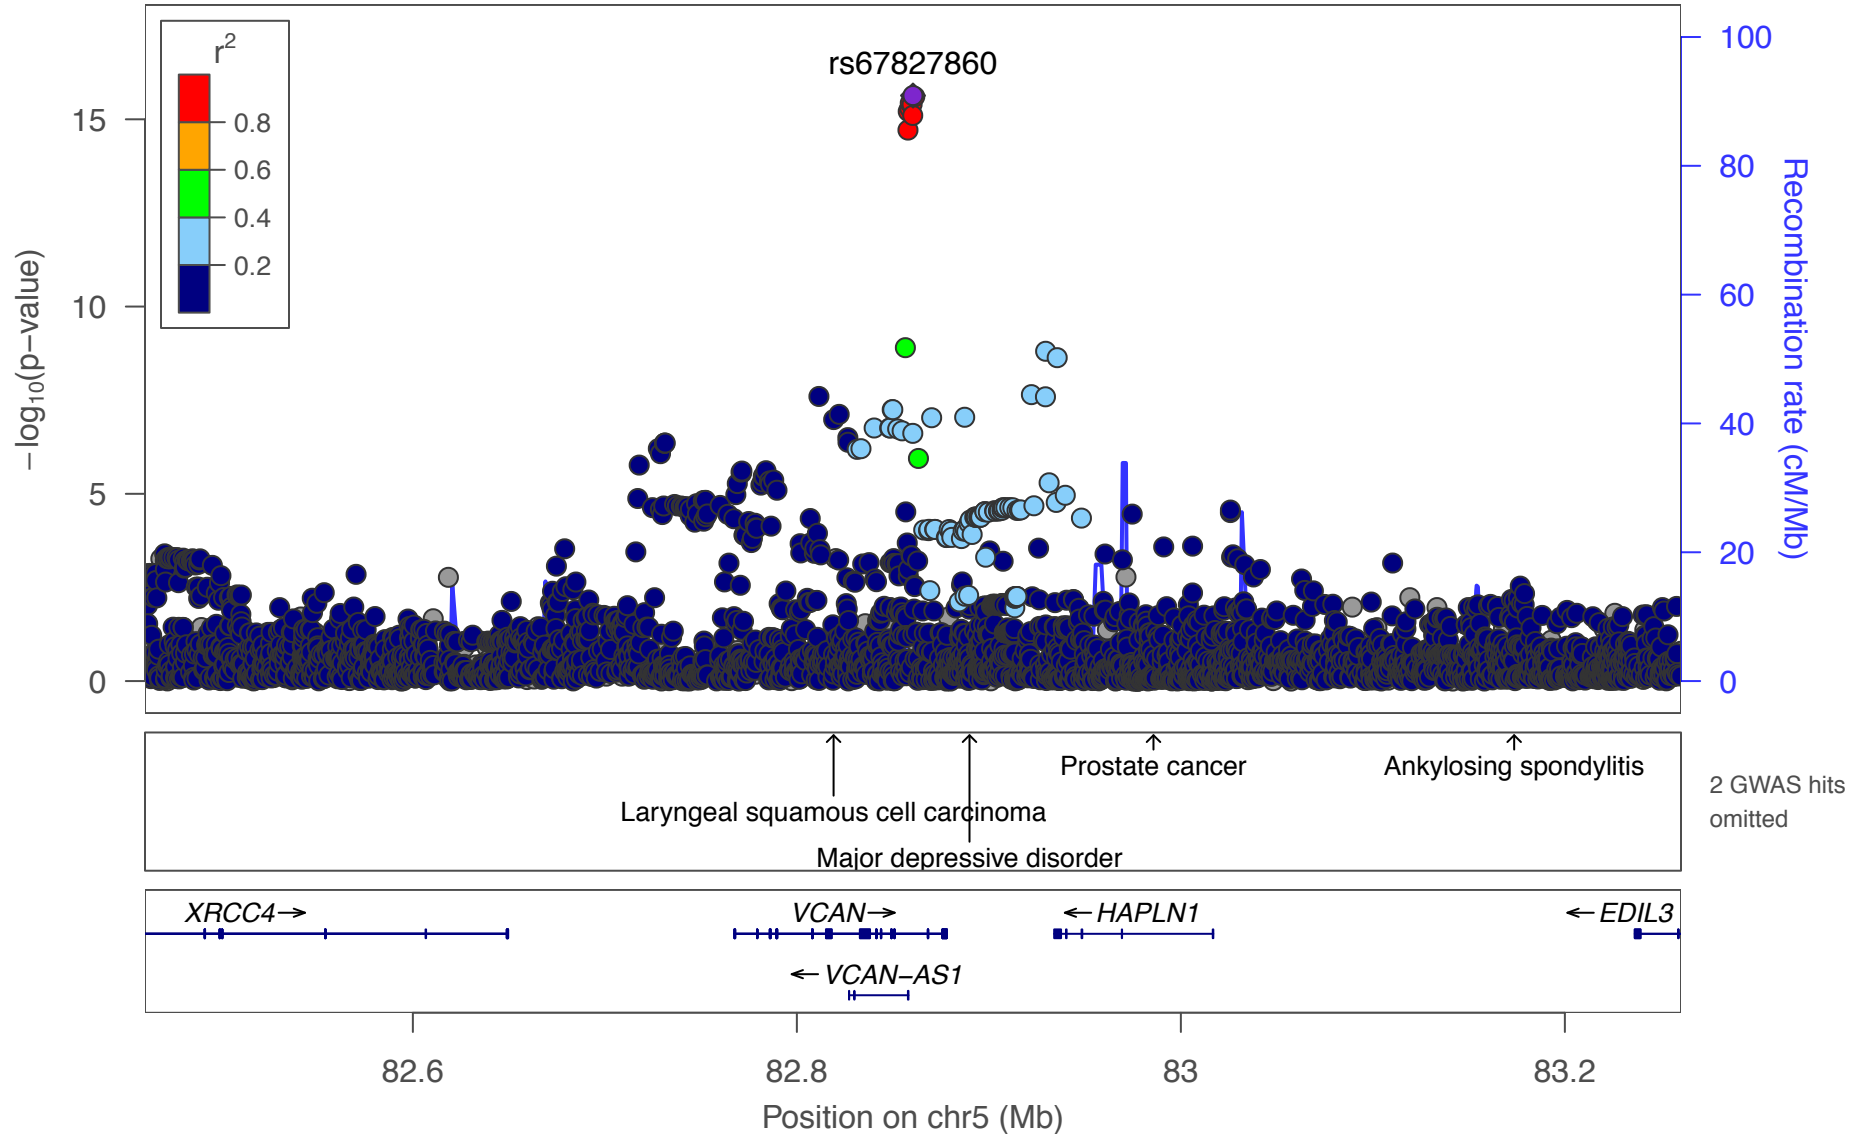

date: Thu Aug 17 17:52:01 2017

build: hg19

display range: chr5:82460485–83260485 [82460485–83260485]

hilite range: 0 – 0 [ 0 – 0 ]

reference SNP: chr5:82860485

number of SNPs plotted: 3393

min P.value: 2.32E–16 [chr5:82860485]

max P.value: 10E–1 [chr5:82975351]

omitted GWAS Hits: NA, NA

## GWAS Catalog SNPs in Region

| <b>chr</b> | <b>pos (Mb)</b> | <b>trait</b>                      | <b>snp</b> |
|------------|-----------------|-----------------------------------|------------|
| 5          | 82.81912        | Laryngeal squamous cell carcinoma | rs310518   |
| 5          | 82.84549        | Diisocyanate-induced asthma       | rs3852186  |
| 5          | 82.88991        | Major depressive disorder         | rs310501   |
| 5          | 82.96073        | Visceral fat                      | rs3846635  |
| 5          | 82.98574        | Prostate cancer                   | rs4466137  |
| 5          | 83.17359        | Ankylosing spondylitis            | rs4552569  |

# ProbtrackX\_L2\_ifo\_I

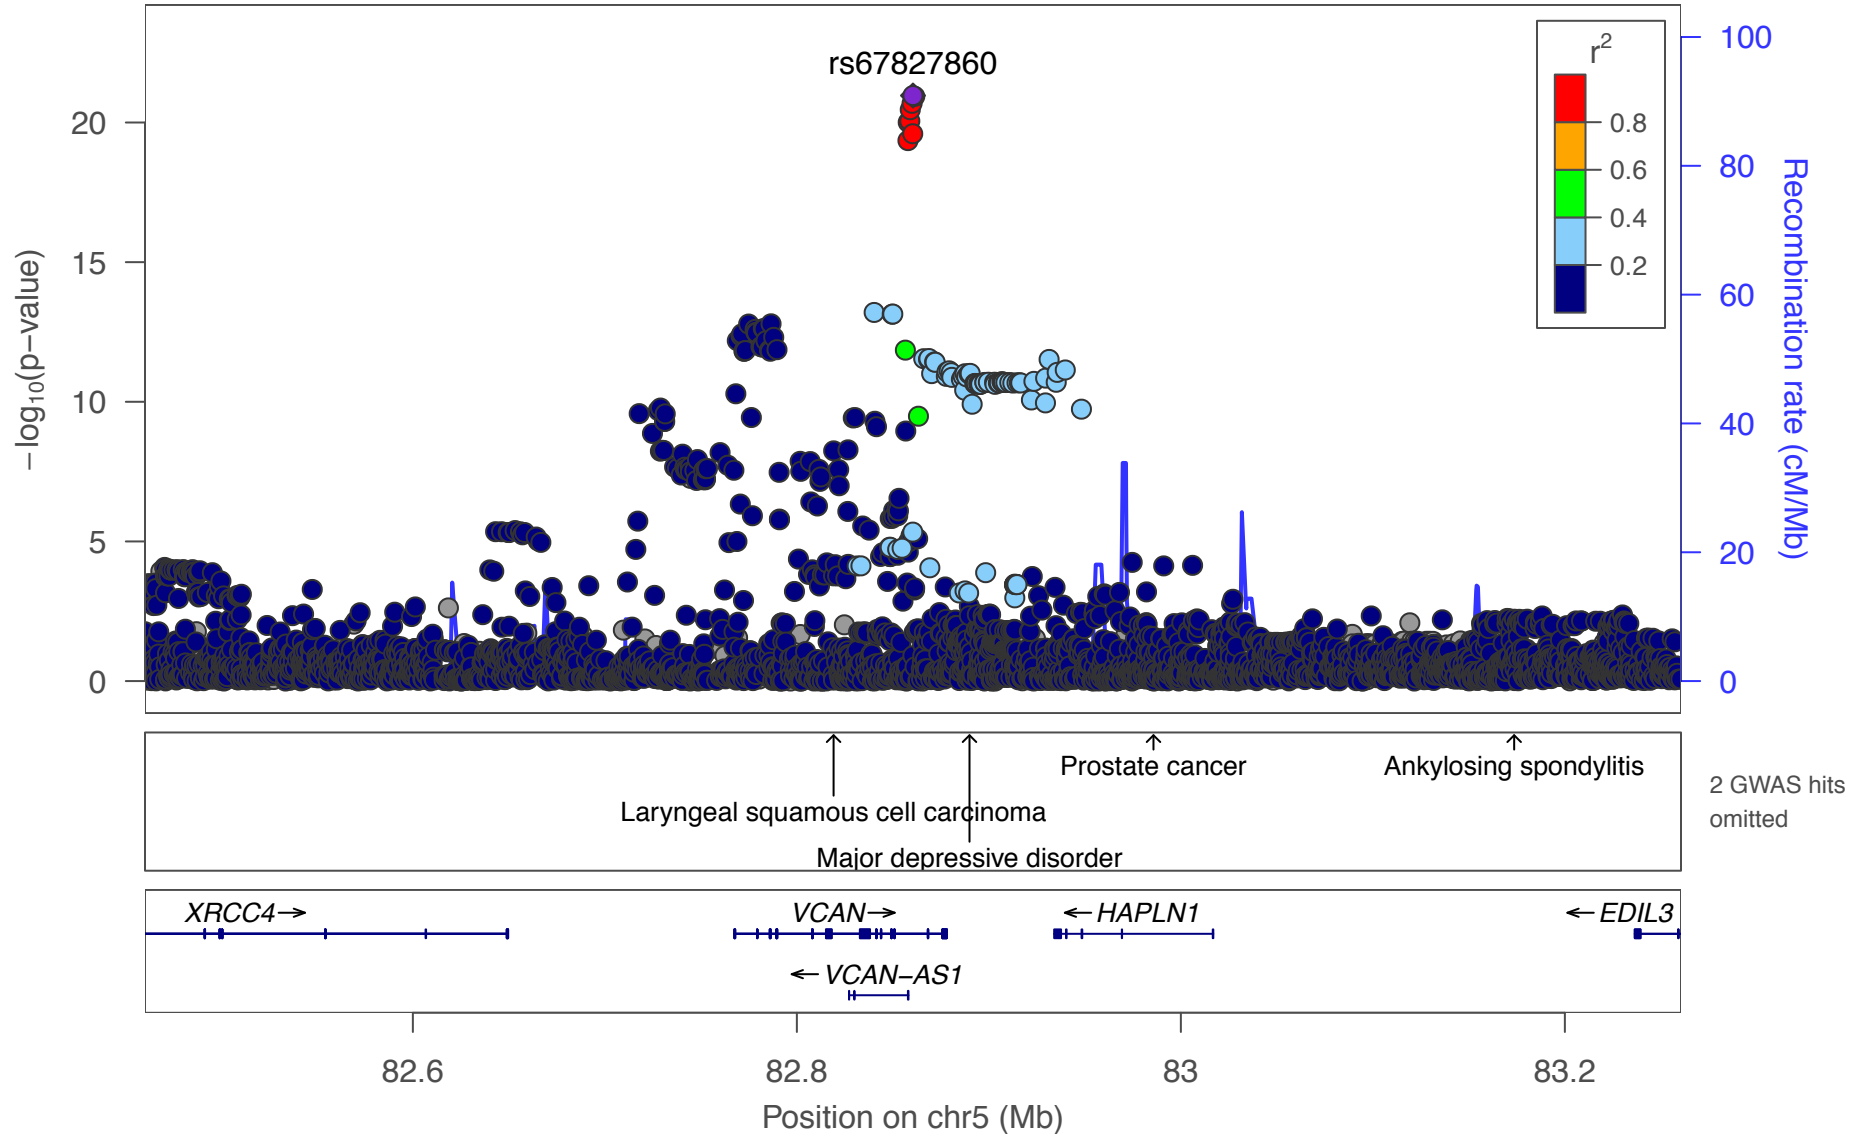

date: Thu Aug 17 17:52:01 2017

build: hg19

display range: chr5:82460485–83260485 [82460485–83260485]

hilite range: 0 – 0 [ 0 – 0 ]

reference SNP: chr5:82860485

number of SNPs plotted: 3393

min P.value: 1.08E–21 [chr5:82860485]

max P.value: 9.99E–1 [chr5:82901436]

omitted GWAS Hits: NA, NA

## GWAS Catalog SNPs in Region

| <b>chr</b> | <b>pos (Mb)</b> | <b>trait</b>                      | <b>snp</b> |
|------------|-----------------|-----------------------------------|------------|
| 5          | 82.81912        | Laryngeal squamous cell carcinoma | rs310518   |
| 5          | 82.84549        | Diisocyanate-induced asthma       | rs3852186  |
| 5          | 82.88991        | Major depressive disorder         | rs310501   |
| 5          | 82.96073        | Visceral fat                      | rs3846635  |
| 5          | 82.98574        | Prostate cancer                   | rs4466137  |
| 5          | 83.17359        | Ankylosing spondylitis            | rs4552569  |

# ProbtrackX\_L2\_ifo\_r

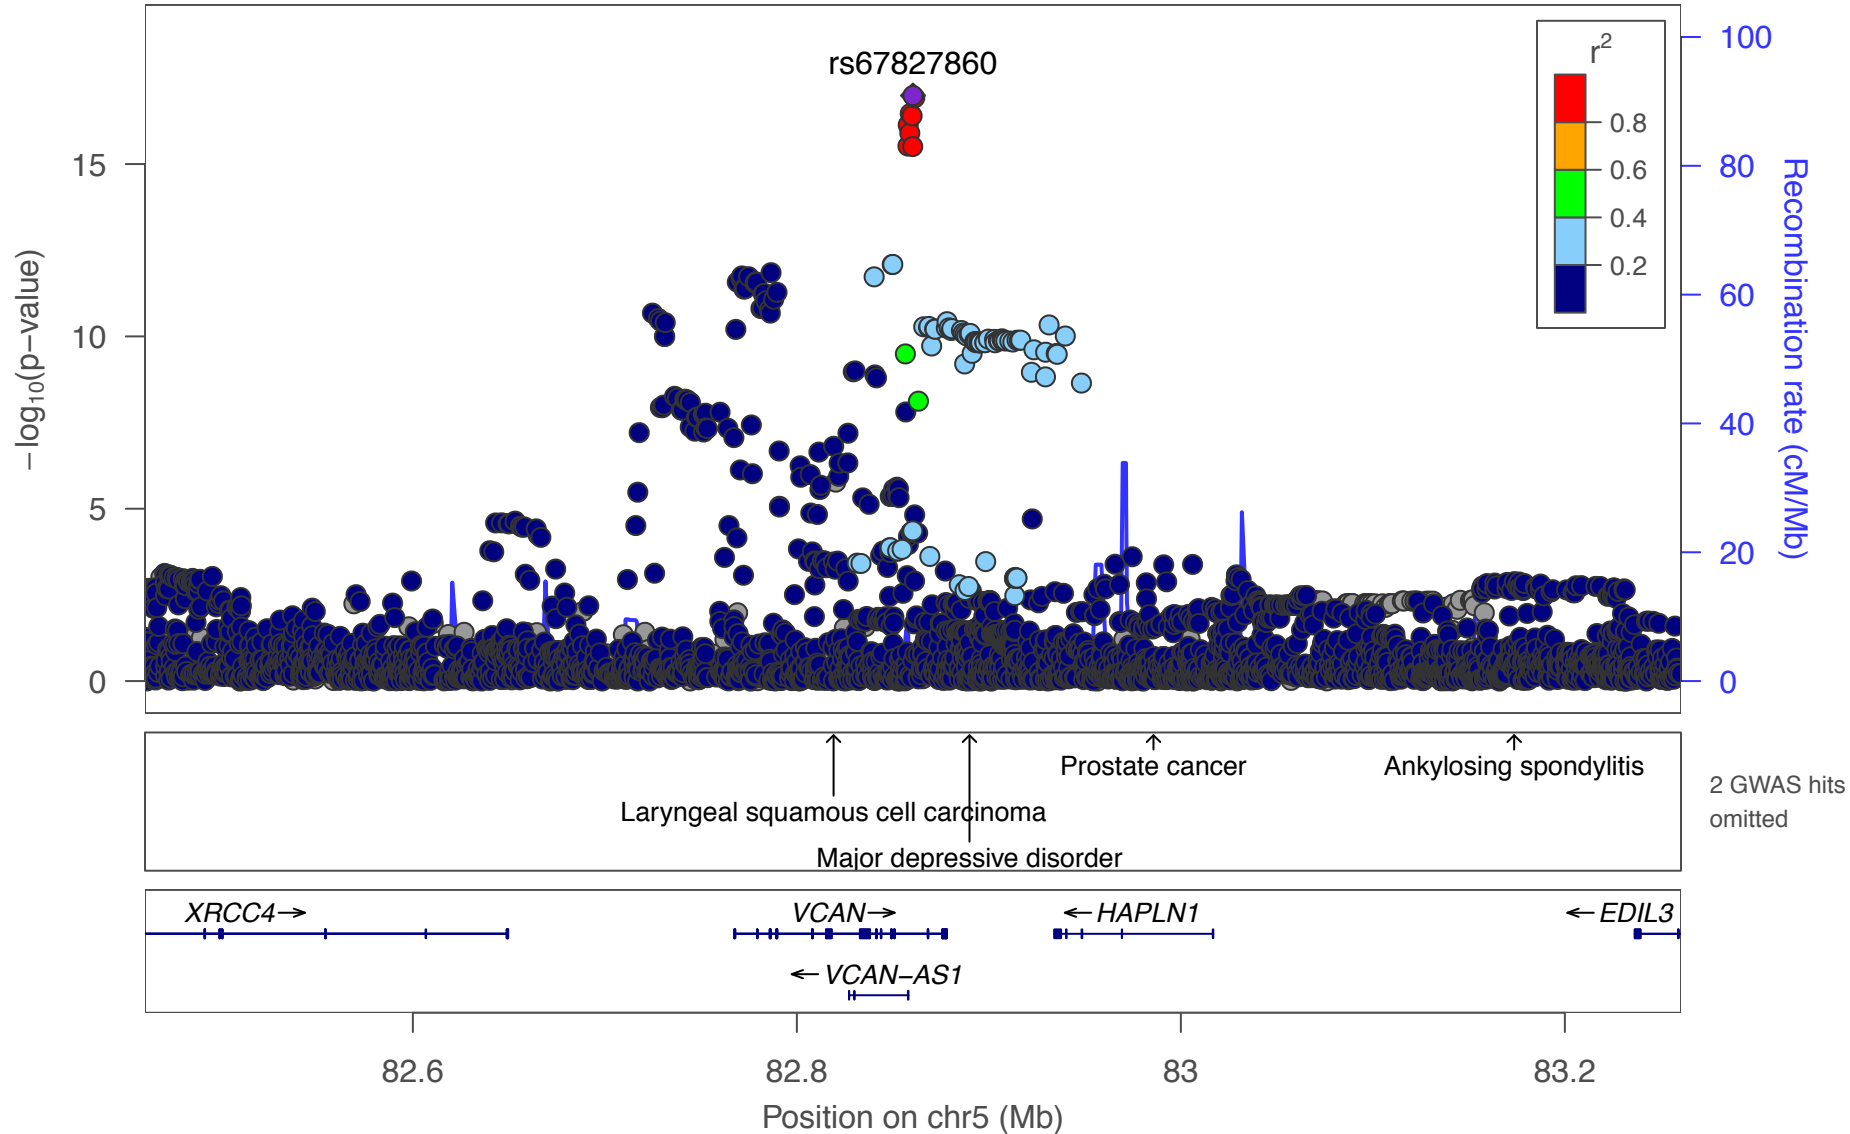

date: Thu Aug 17 17:52:01 2017

build: hg19

display range: chr5:82460485–83260485 [82460485–83260485]

hilite range: 0 – 0 [ 0 – 0 ]

reference SNP: chr5:82860485

number of SNPs plotted: 3393

min P.value: 1.03E–17 [chr5:82860485]

max P.value: 9.99E–1 [chr5:82776020]

omitted GWAS Hits: NA, NA



## GWAS Catalog SNPs in Region

| <b>chr</b> | <b>pos (Mb)</b> | <b>trait</b>                      | <b>snp</b> |
|------------|-----------------|-----------------------------------|------------|
| 5          | 82.81912        | Laryngeal squamous cell carcinoma | rs310518   |
| 5          | 82.84549        | Diisocyanate-induced asthma       | rs3852186  |
| 5          | 82.88991        | Major depressive disorder         | rs310501   |
| 5          | 82.96073        | Visceral fat                      | rs3846635  |
| 5          | 82.98574        | Prostate cancer                   | rs4466137  |
| 5          | 83.17359        | Ankylosing spondylitis            | rs4552569  |

# ProbtrackX\_L2\_ilf\_I

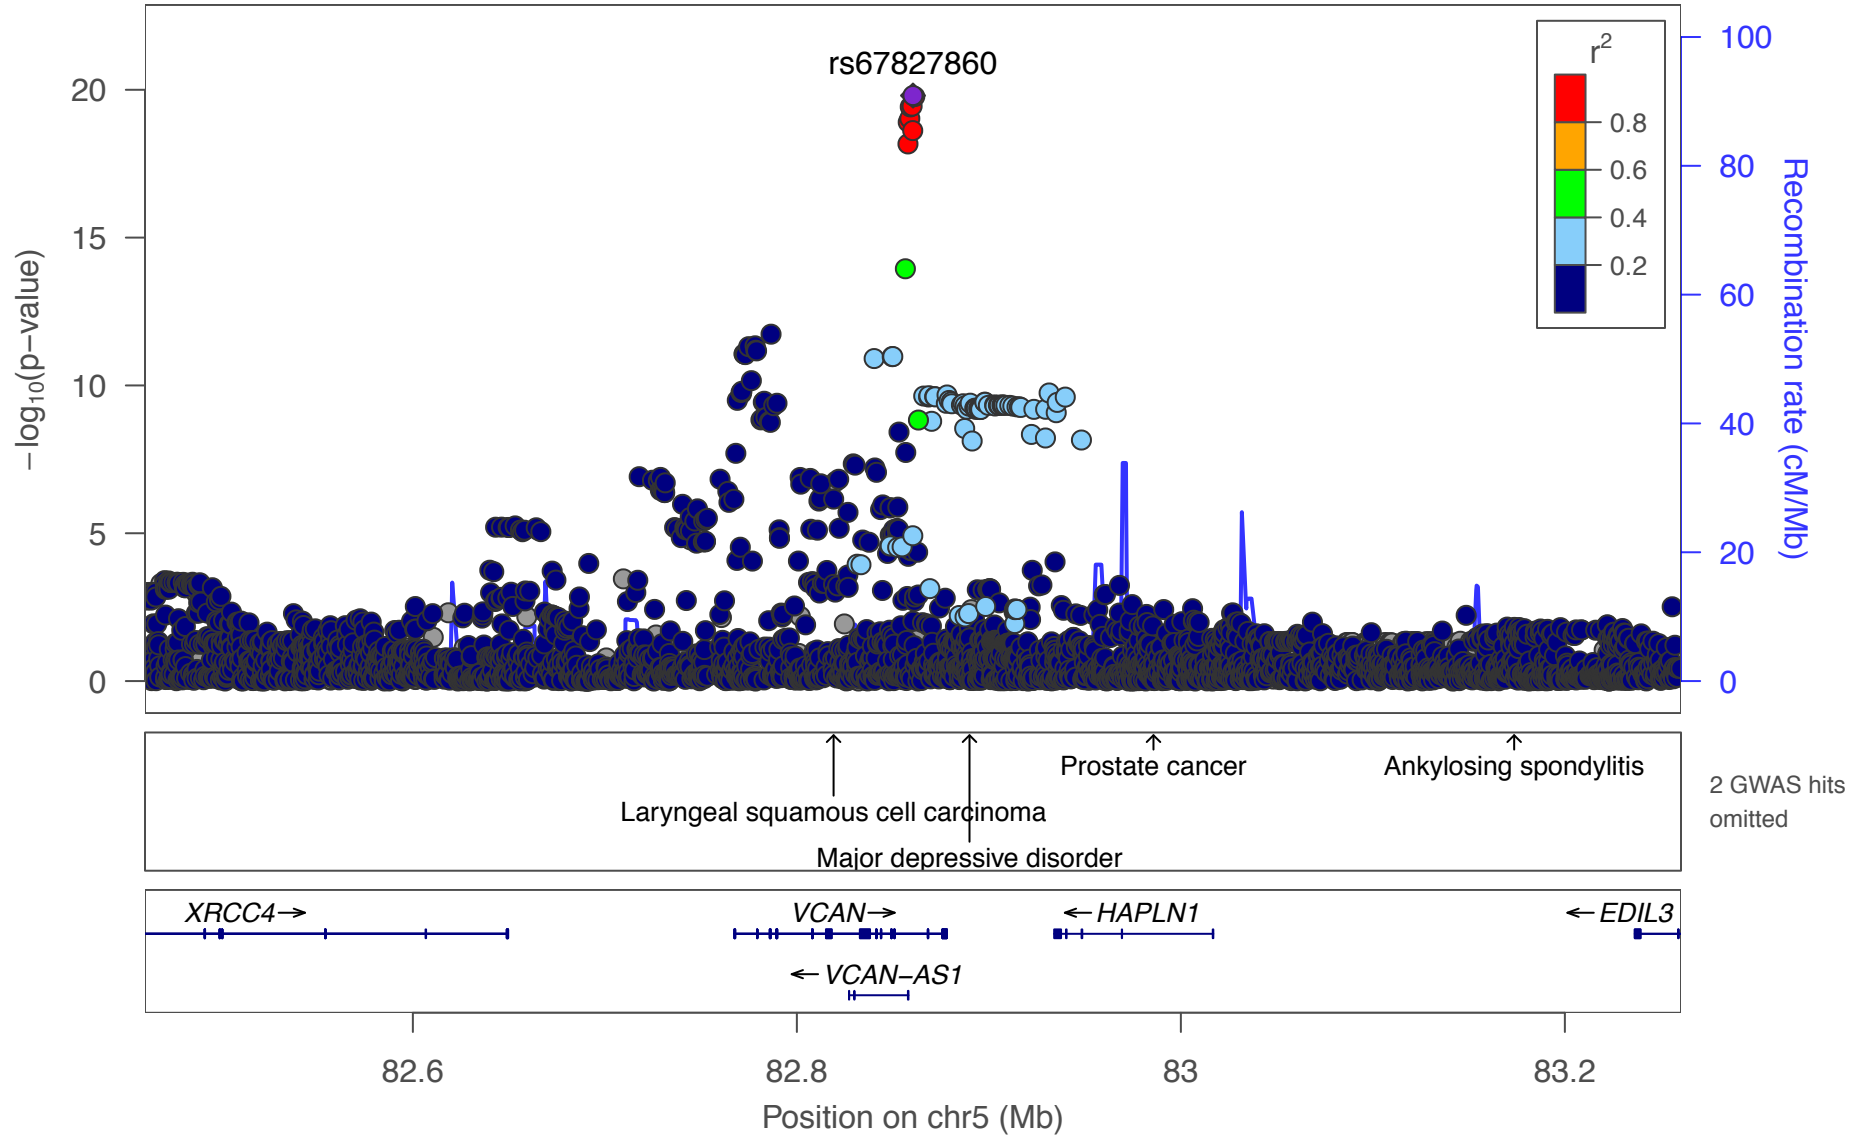

date: Thu Aug 17 17:52:01 2017

build: hg19

display range: chr5:82460485–83260485 [82460485–83260485]

hilite range: 0 – 0 [ 0 – 0 ]

reference SNP: chr5:82860485

number of SNPs plotted: 3393

min P.value: 1.57E–20 [chr5:82860485]

max P.value: 9.99E–1 [chr5:82649969]

omitted GWAS Hits: NA, NA

## GWAS Catalog SNPs in Region

| <b>chr</b> | <b>pos (Mb)</b> | <b>trait</b>                      | <b>snp</b> |
|------------|-----------------|-----------------------------------|------------|
| 5          | 82.81912        | Laryngeal squamous cell carcinoma | rs310518   |
| 5          | 82.84549        | Diisocyanate-induced asthma       | rs3852186  |
| 5          | 82.88991        | Major depressive disorder         | rs310501   |
| 5          | 82.96073        | Visceral fat                      | rs3846635  |
| 5          | 82.98574        | Prostate cancer                   | rs4466137  |
| 5          | 83.17359        | Ankylosing spondylitis            | rs4552569  |

# ProtrackX\_L2\_ilf\_r

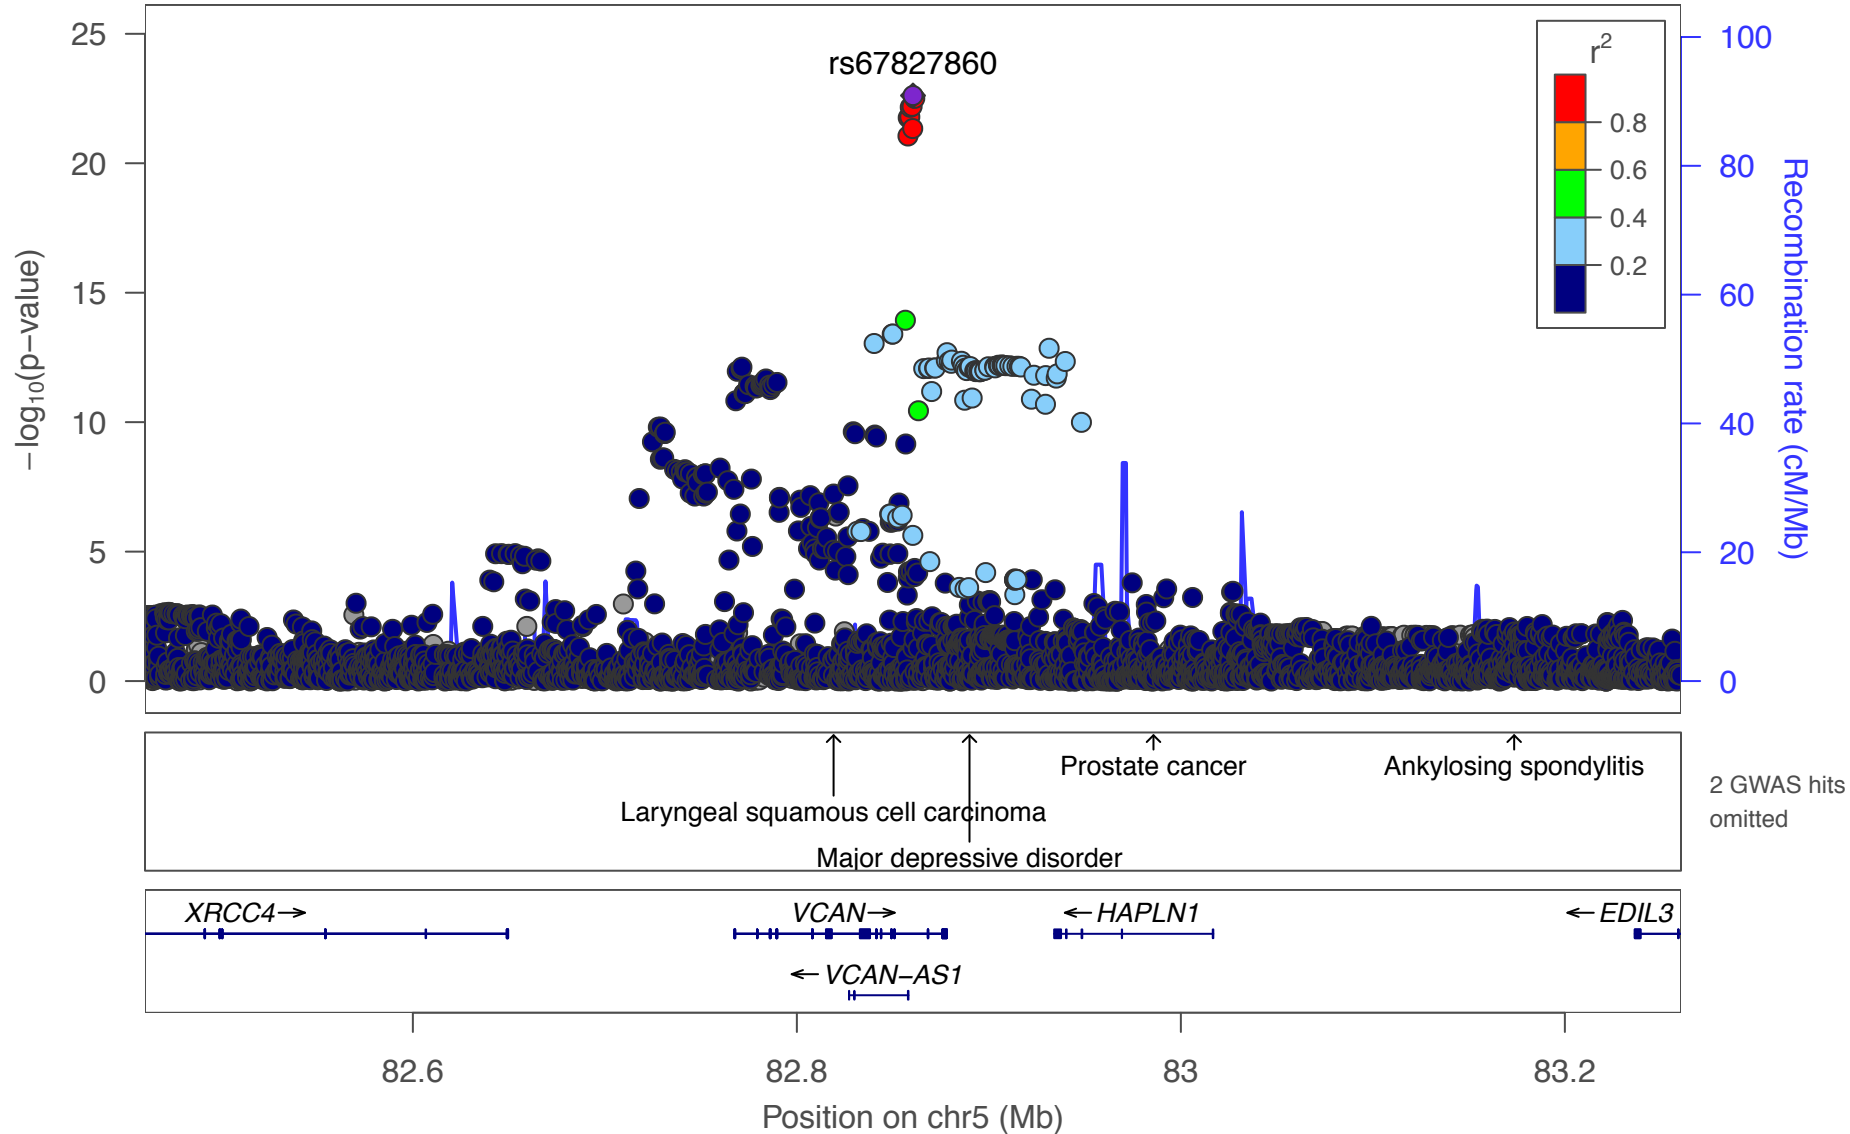

date: Thu Aug 17 17:52:01 2017

build: hg19

display range: chr5:82460485–83260485 [82460485–83260485]

hilite range: 0 – 0 [ 0 – 0 ]

reference SNP: chr5:82860485

number of SNPs plotted: 3393

min P.value: 2.43E–23 [chr5:82860485]

max P.value: 10E–1 [chr5:82769528]

omitted GWAS Hits: NA, NA

## GWAS Catalog SNPs in Region

| <b>chr</b> | <b>pos (Mb)</b> | <b>trait</b>                      | <b>snp</b> |
|------------|-----------------|-----------------------------------|------------|
| 5          | 82.81912        | Laryngeal squamous cell carcinoma | rs310518   |
| 5          | 82.84549        | Diisocyanate-induced asthma       | rs3852186  |
| 5          | 82.88991        | Major depressive disorder         | rs310501   |
| 5          | 82.96073        | Visceral fat                      | rs3846635  |
| 5          | 82.98574        | Prostate cancer                   | rs4466137  |
| 5          | 83.17359        | Ankylosing spondylitis            | rs4552569  |

# ProbtrackX\_L2\_slf\_r

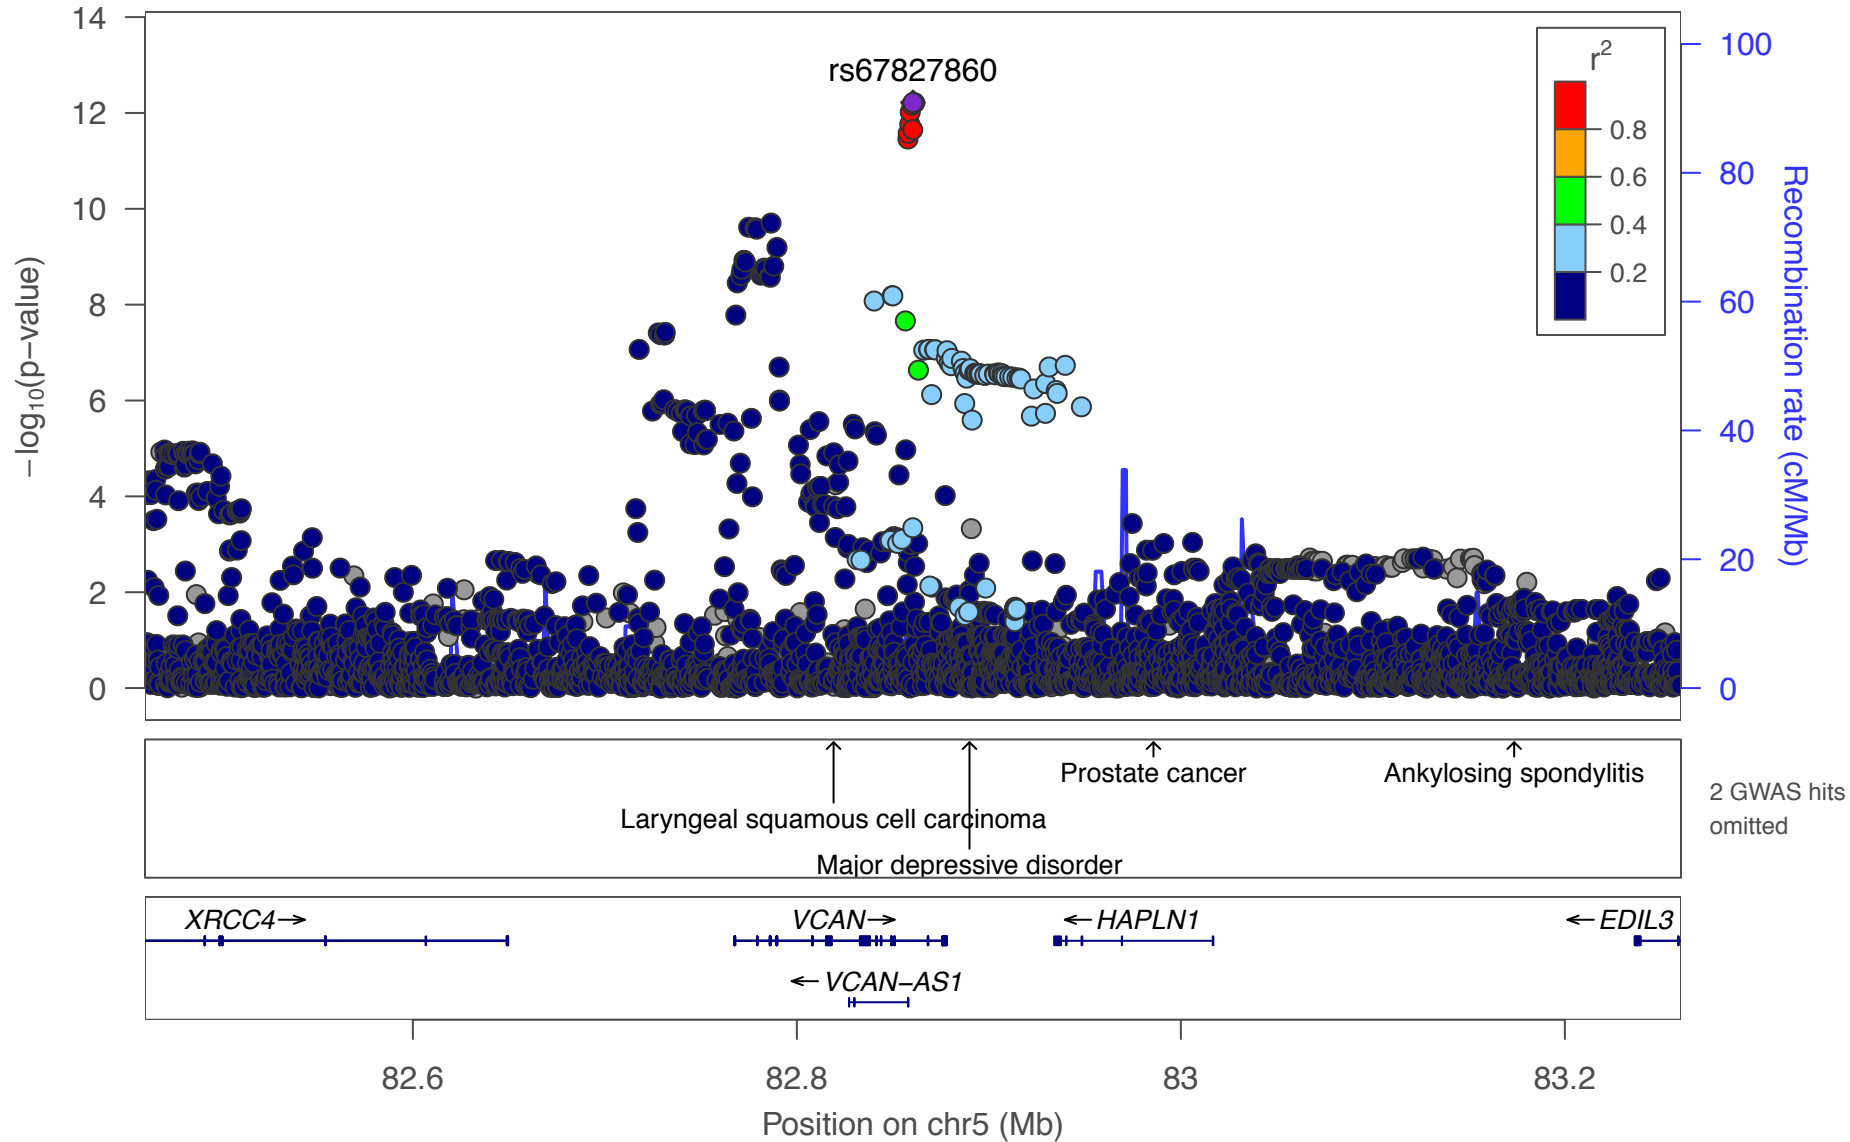



date: Thu Aug 17 17:52:01 2017

build: hg19

display range: chr5:82460485–83260485 [82460485–83260485]

hilite range: 0 – 0 [ 0 – 0 ]

reference SNP: chr5:82860485

number of SNPs plotted: 3393

min P.value: 6.07E–13 [chr5:82860485]

max P.value: 10E–1 [chr5:82768225]

omitted GWAS Hits: NA, NA

## GWAS Catalog SNPs in Region

| <b>chr</b> | <b>pos (Mb)</b> | <b>trait</b>                      | <b>snp</b> |
|------------|-----------------|-----------------------------------|------------|
| 5          | 82.81912        | Laryngeal squamous cell carcinoma | rs310518   |
| 5          | 82.84549        | Diisocyanate-induced asthma       | rs3852186  |
| 5          | 82.88991        | Major depressive disorder         | rs310501   |
| 5          | 82.96073        | Visceral fat                      | rs3846635  |
| 5          | 82.98574        | Prostate cancer                   | rs4466137  |
| 5          | 83.17359        | Ankylosing spondylitis            | rs4552569  |

# ProbtrackX\_L3\_ifo\_r

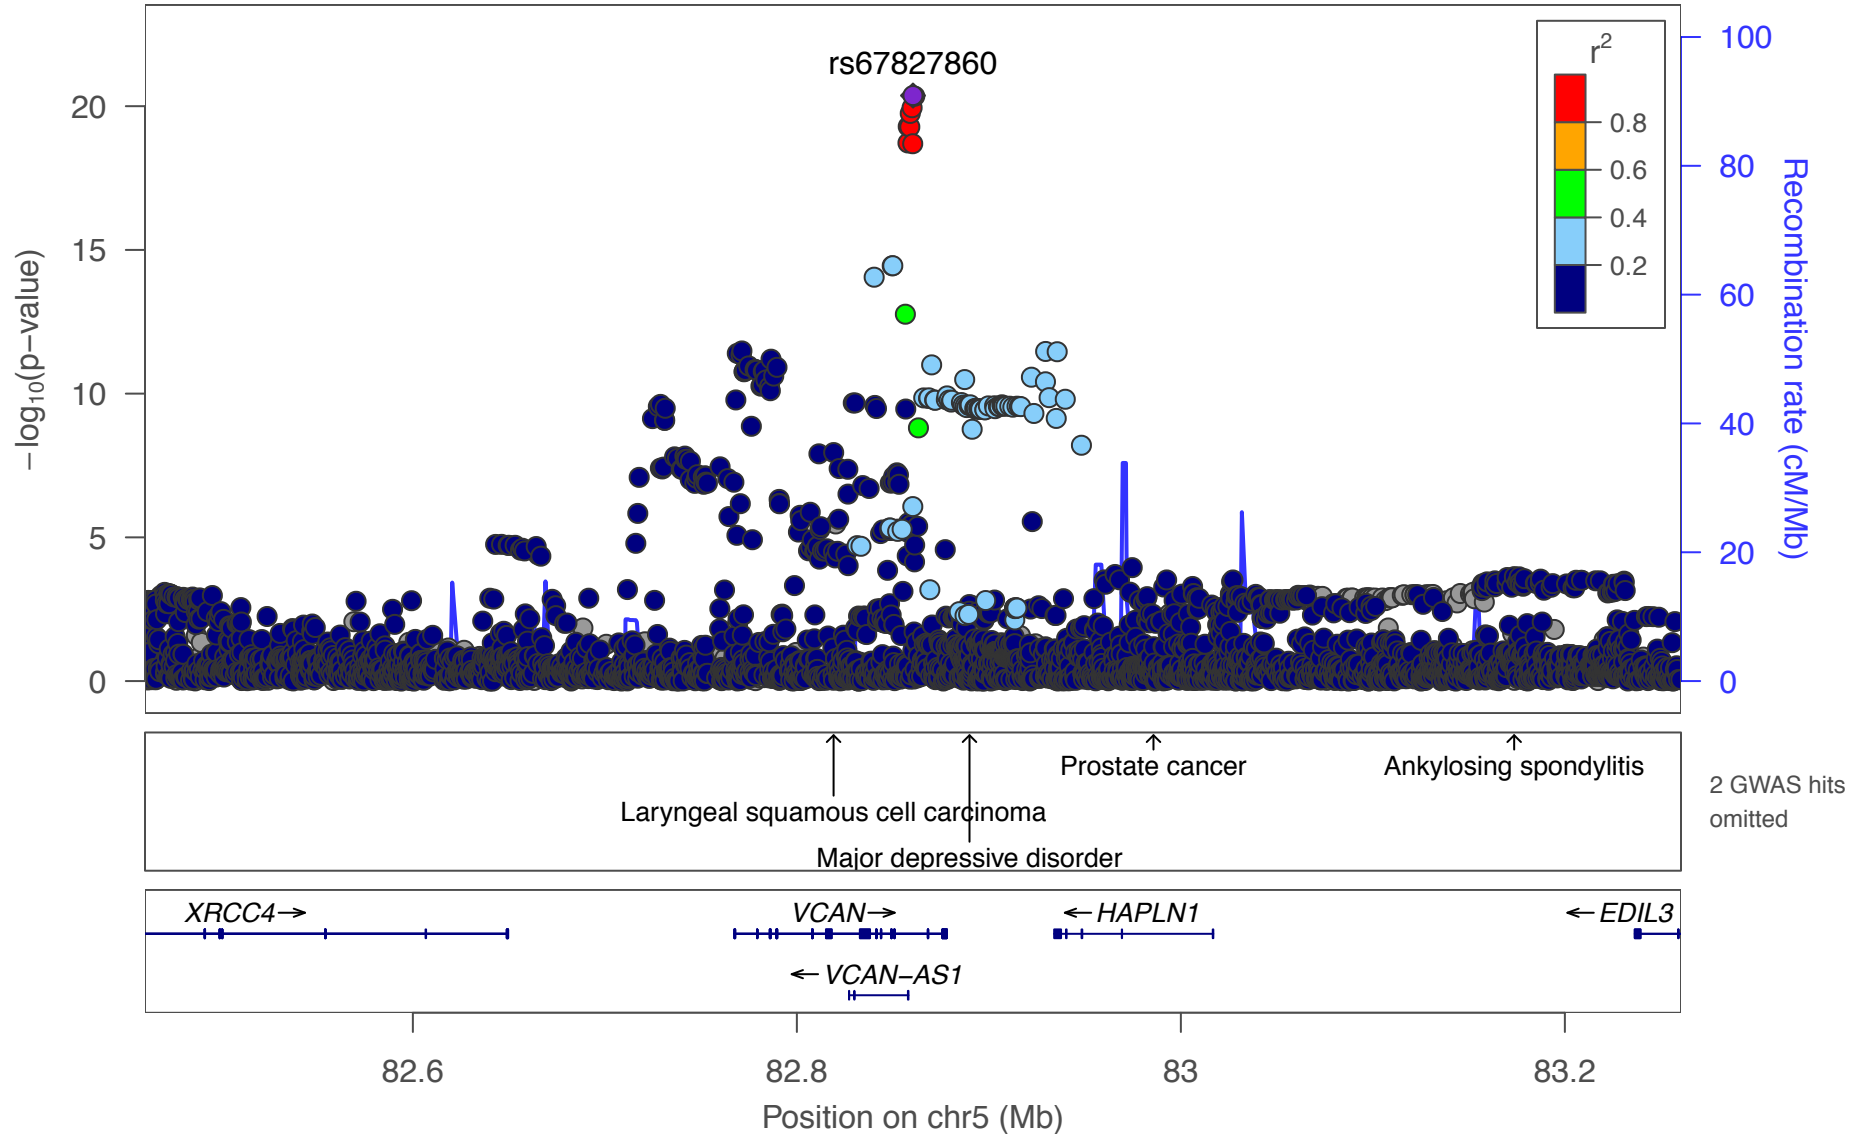

date: Thu Aug 17 17:52:01 2017

build: hg19

display range: chr5:82460485–83260485 [82460485–83260485]

hilite range: 0 – 0 [ 0 – 0 ]

reference SNP: chr5:82860485

number of SNPs plotted: 3393

min P.value: 4.27E–21 [chr5:82860485]

max P.value: 10E–1 [chr5:82897384]

omitted GWAS Hits: NA, NA

## GWAS Catalog SNPs in Region

| <b>chr</b> | <b>pos (Mb)</b> | <b>trait</b>                      | <b>snp</b> |
|------------|-----------------|-----------------------------------|------------|
| 5          | 82.81912        | Laryngeal squamous cell carcinoma | rs310518   |
| 5          | 82.84549        | Diisocyanate-induced asthma       | rs3852186  |
| 5          | 82.88991        | Major depressive disorder         | rs310501   |
| 5          | 82.96073        | Visceral fat                      | rs3846635  |
| 5          | 82.98574        | Prostate cancer                   | rs4466137  |
| 5          | 83.17359        | Ankylosing spondylitis            | rs4552569  |

# ProtrackX\_L3\_ilf\_I

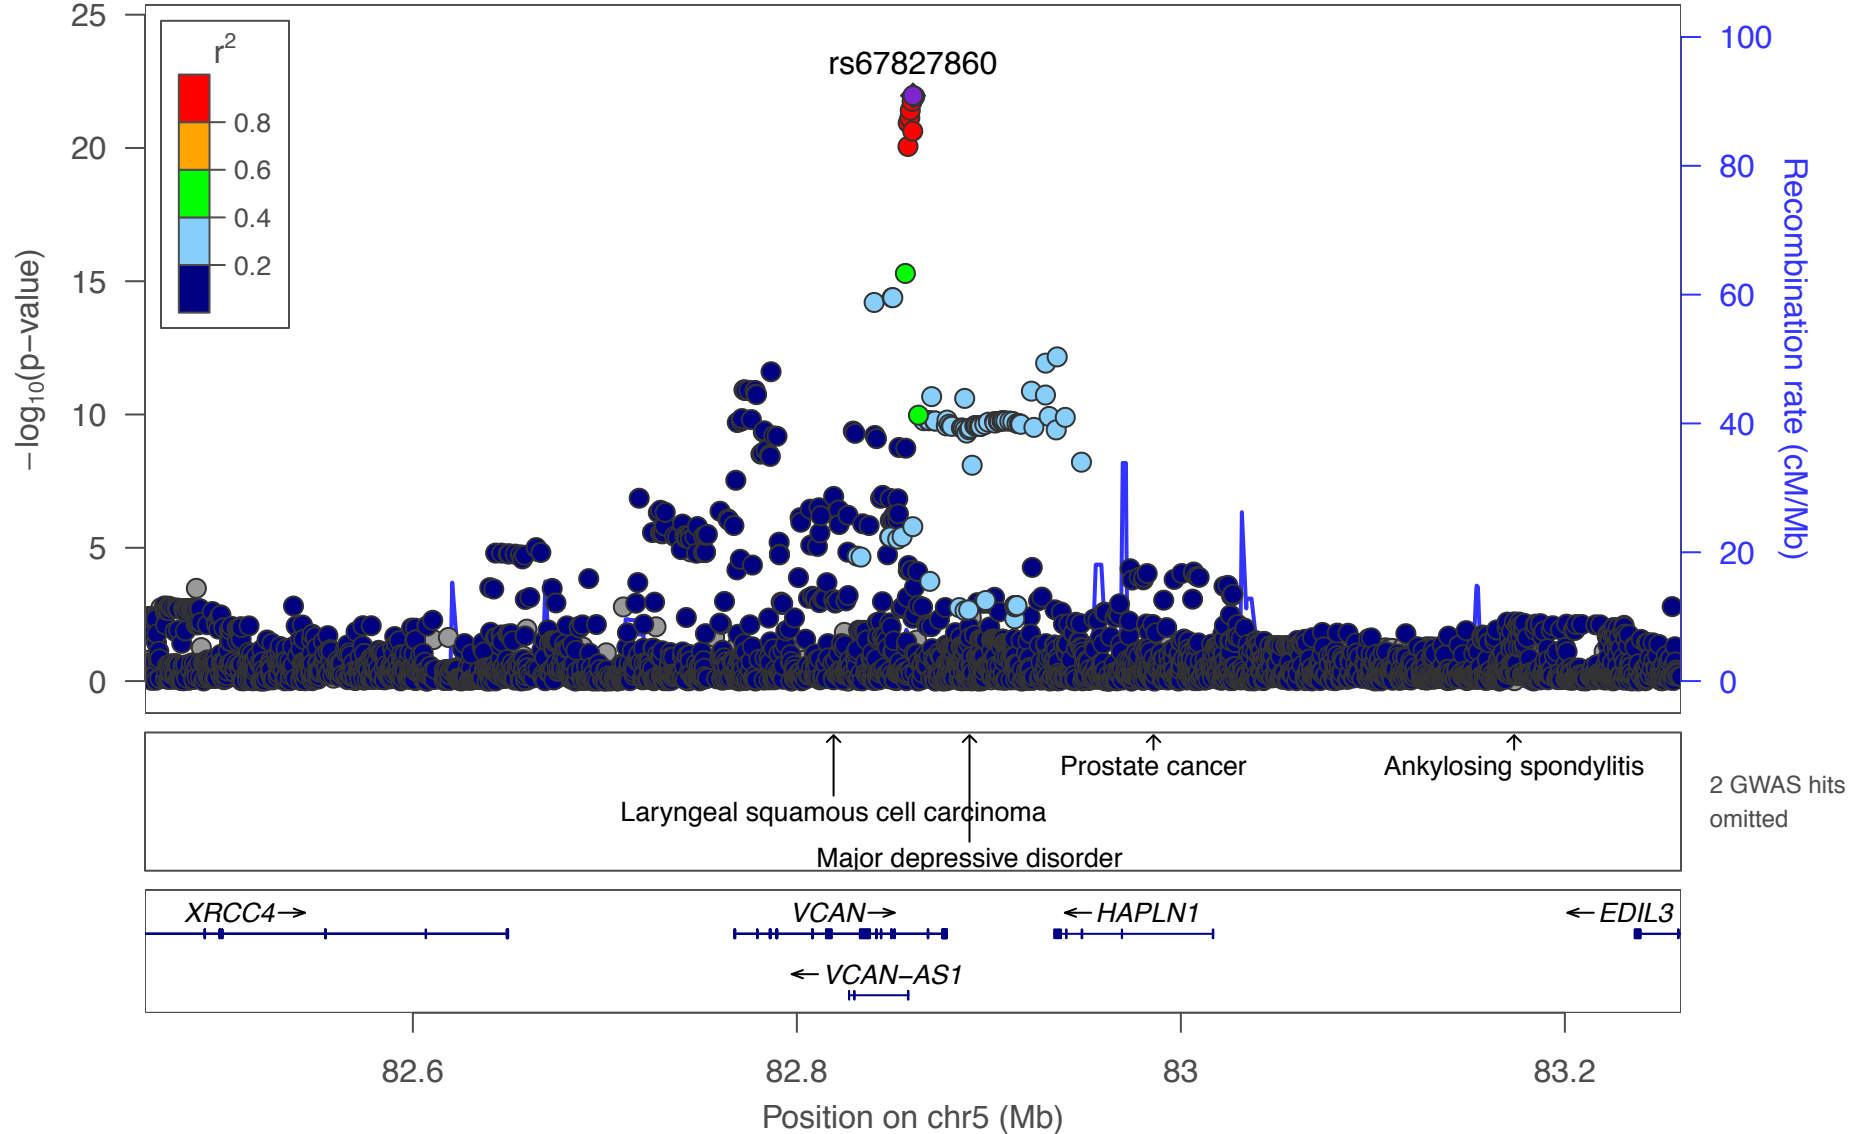

date: Thu Aug 17 17:52:01 2017

build: hg19

display range: chr5:82460485–83260485 [82460485–83260485]

hilite range: 0 – 0 [ 0 – 0 ]

reference SNP: chr5:82860485

number of SNPs plotted: 3393

min P.value: 1.08E–22 [chr5:82860485]

max P.value: 10E–1 [chr5:83165955]

omitted GWAS Hits: NA, NA

## GWAS Catalog SNPs in Region

| <b>chr</b> | <b>pos (Mb)</b> | <b>trait</b>                      | <b>snp</b> |
|------------|-----------------|-----------------------------------|------------|
| 5          | 82.81912        | Laryngeal squamous cell carcinoma | rs310518   |
| 5          | 82.84549        | Diisocyanate-induced asthma       | rs3852186  |
| 5          | 82.88991        | Major depressive disorder         | rs310501   |
| 5          | 82.96073        | Visceral fat                      | rs3846635  |
| 5          | 82.98574        | Prostate cancer                   | rs4466137  |
| 5          | 83.17359        | Ankylosing spondylitis            | rs4552569  |



# ProtrackX\_L3\_ilf\_r

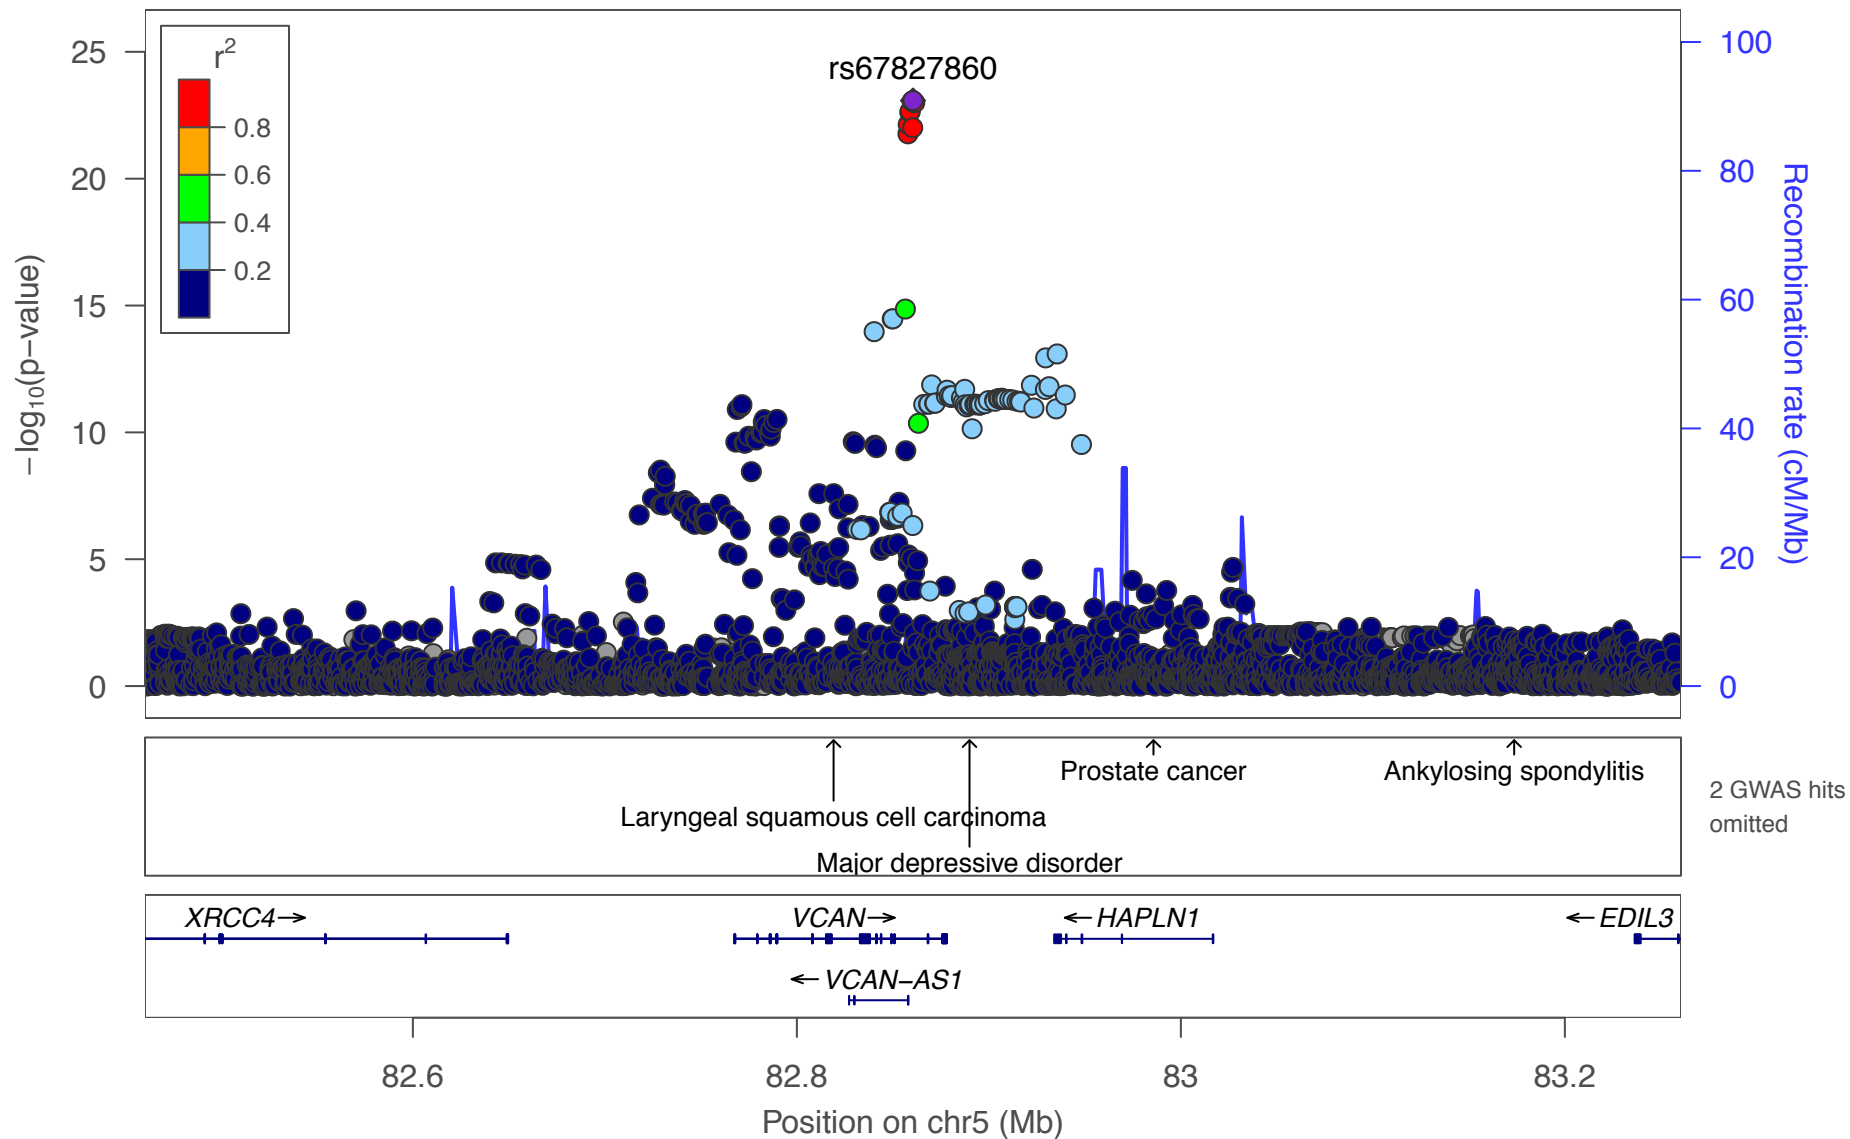

date: Thu Aug 17 17:52:01 2017

build: hg19

display range: chr5:82460485–83260485 [82460485–83260485]

hilite range: 0 – 0 [ 0 – 0 ]

reference SNP: chr5:82860485

number of SNPs plotted: 3393

min P.value: 8.34E–24 [chr5:82860485]

max P.value: 10E–1 [chr5:82978826]

omitted GWAS Hits: NA, NA

## GWAS Catalog SNPs in Region

| <b>chr</b> | <b>pos (Mb)</b> | <b>trait</b>                      | <b>snp</b> |
|------------|-----------------|-----------------------------------|------------|
| 5          | 82.81912        | Laryngeal squamous cell carcinoma | rs310518   |
| 5          | 82.84549        | Diisocyanate-induced asthma       | rs3852186  |
| 5          | 82.88991        | Major depressive disorder         | rs310501   |
| 5          | 82.96073        | Visceral fat                      | rs3846635  |
| 5          | 82.98574        | Prostate cancer                   | rs4466137  |
| 5          | 83.17359        | Ankylosing spondylitis            | rs4552569  |

# ProbtrackX\_L3\_slf\_r

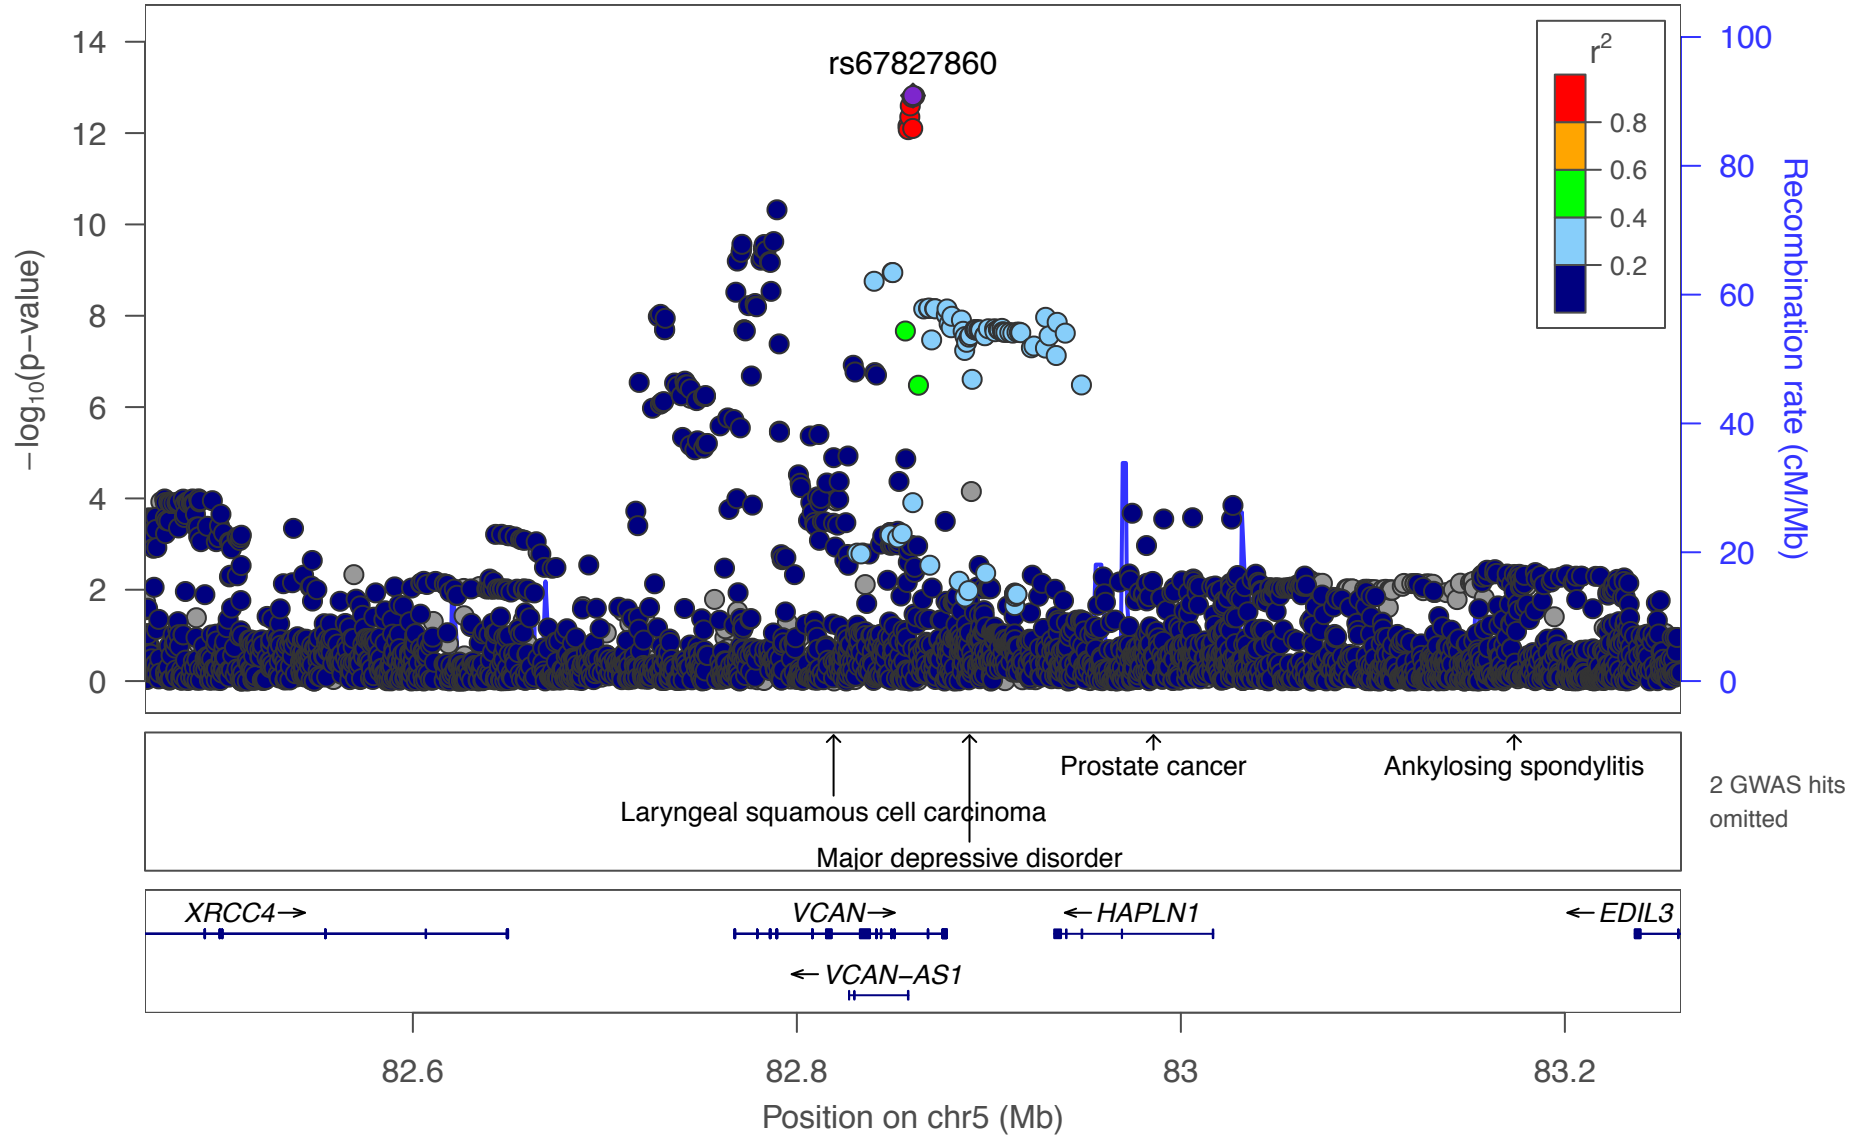

date: Thu Aug 17 17:52:01 2017

build: hg19

display range: chr5:82460485–83260485 [82460485–83260485]

hilite range: 0 – 0 [ 0 – 0 ]

reference SNP: chr5:82860485

number of SNPs plotted: 3393

min P.value: 1.51E–13 [chr5:82860485]

max P.value: 10E–1 [chr5:82510720]

omitted GWAS Hits: NA, NA

## GWAS Catalog SNPs in Region

| <b>chr</b> | <b>pos (Mb)</b> | <b>trait</b>                      | <b>snp</b> |
|------------|-----------------|-----------------------------------|------------|
| 5          | 82.81912        | Laryngeal squamous cell carcinoma | rs310518   |
| 5          | 82.84549        | Diisocyanate-induced asthma       | rs3852186  |
| 5          | 82.88991        | Major depressive disorder         | rs310501   |
| 5          | 82.96073        | Visceral fat                      | rs3846635  |
| 5          | 82.98574        | Prostate cancer                   | rs4466137  |
| 5          | 83.17359        | Ankylosing spondylitis            | rs4552569  |

# ProbtrackX\_ICVF\_cgc\_I

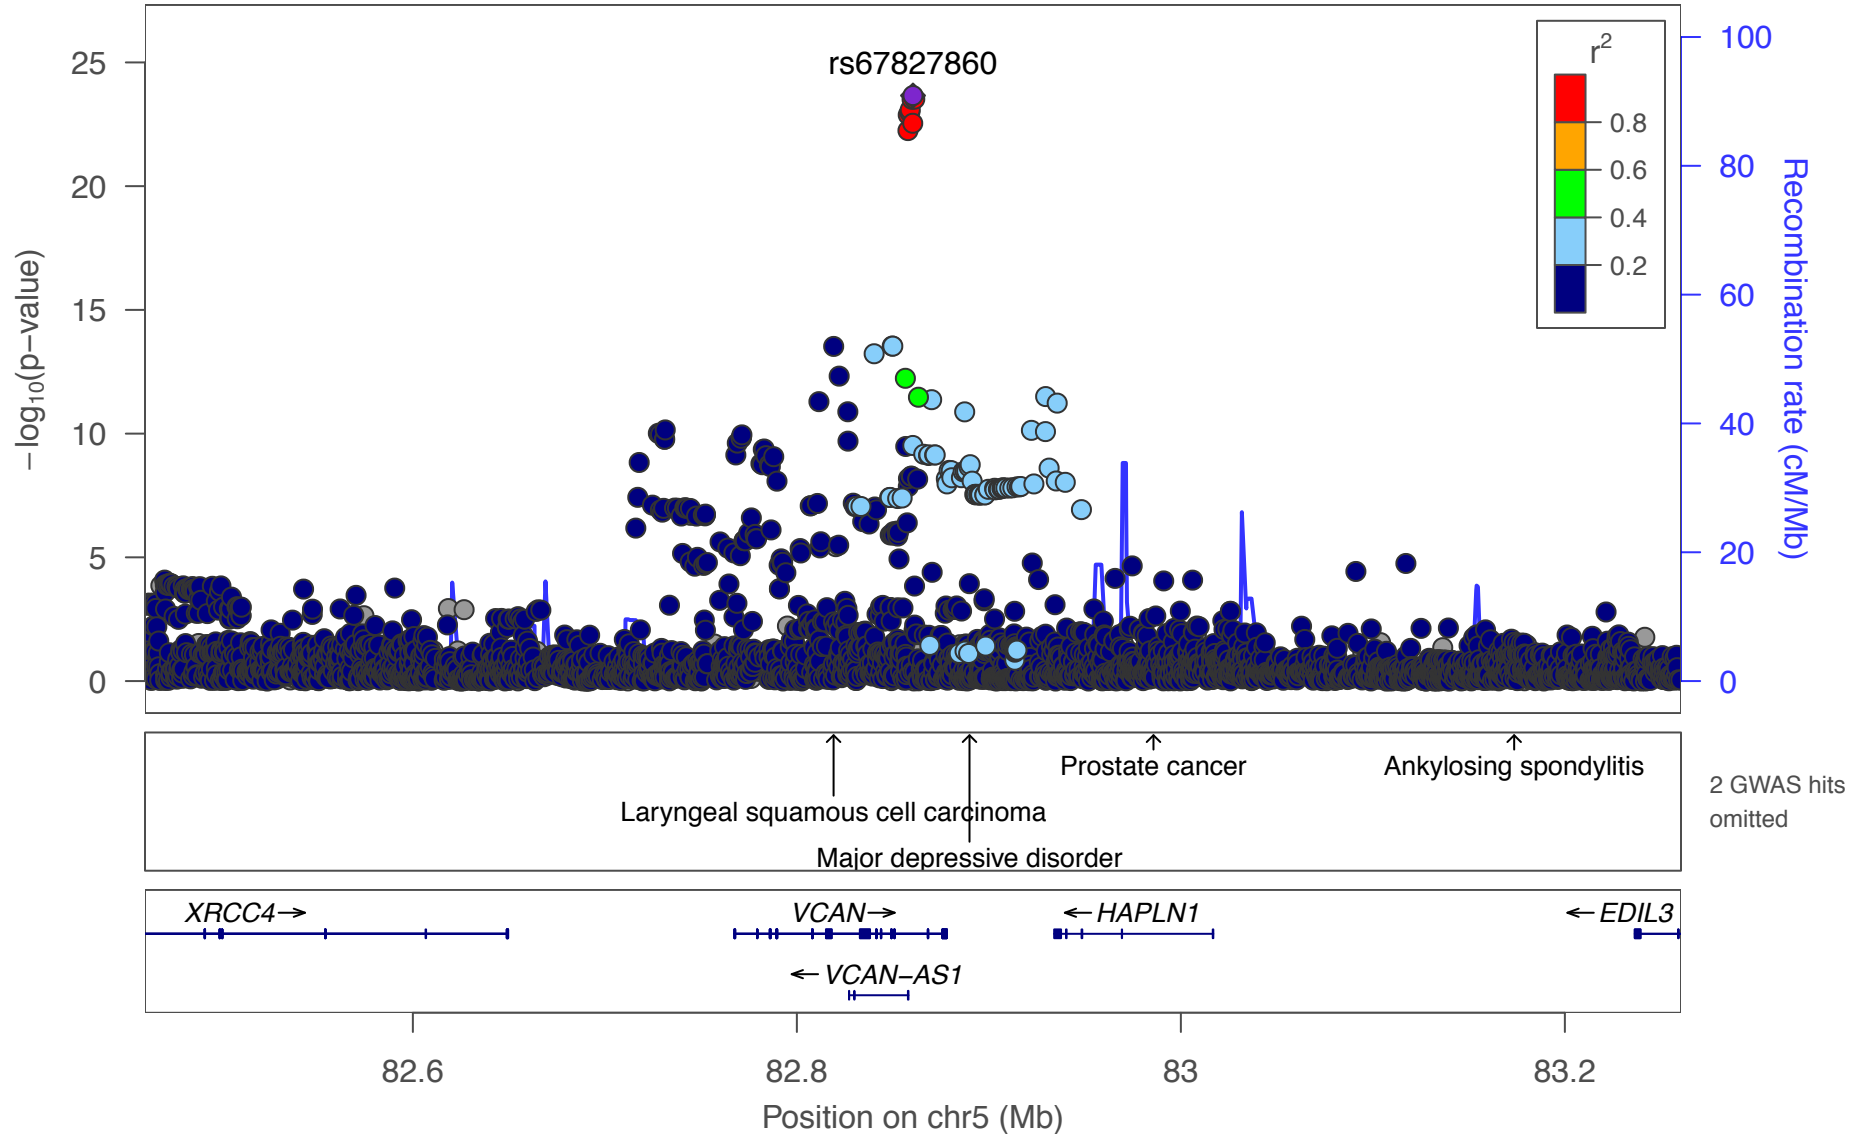

date: Thu Aug 17 17:52:01 2017

build: hg19

display range: chr5:82460485–83260485 [82460485–83260485]

hilite range: 0 – 0 [ 0 – 0 ]

reference SNP: chr5:82860485

number of SNPs plotted: 3393

min P.value: 2.18E–24 [chr5:82860485]

max P.value: 10E–1 [chr5:83139843]

omitted GWAS Hits: NA, NA



## GWAS Catalog SNPs in Region

| <b>chr</b> | <b>pos (Mb)</b> | <b>trait</b>                      | <b>snp</b> |
|------------|-----------------|-----------------------------------|------------|
| 5          | 82.81912        | Laryngeal squamous cell carcinoma | rs310518   |
| 5          | 82.84549        | Diisocyanate-induced asthma       | rs3852186  |
| 5          | 82.88991        | Major depressive disorder         | rs310501   |
| 5          | 82.96073        | Visceral fat                      | rs3846635  |
| 5          | 82.98574        | Prostate cancer                   | rs4466137  |
| 5          | 83.17359        | Ankylosing spondylitis            | rs4552569  |

# ProbtrackX\_ICVF\_cgc\_r

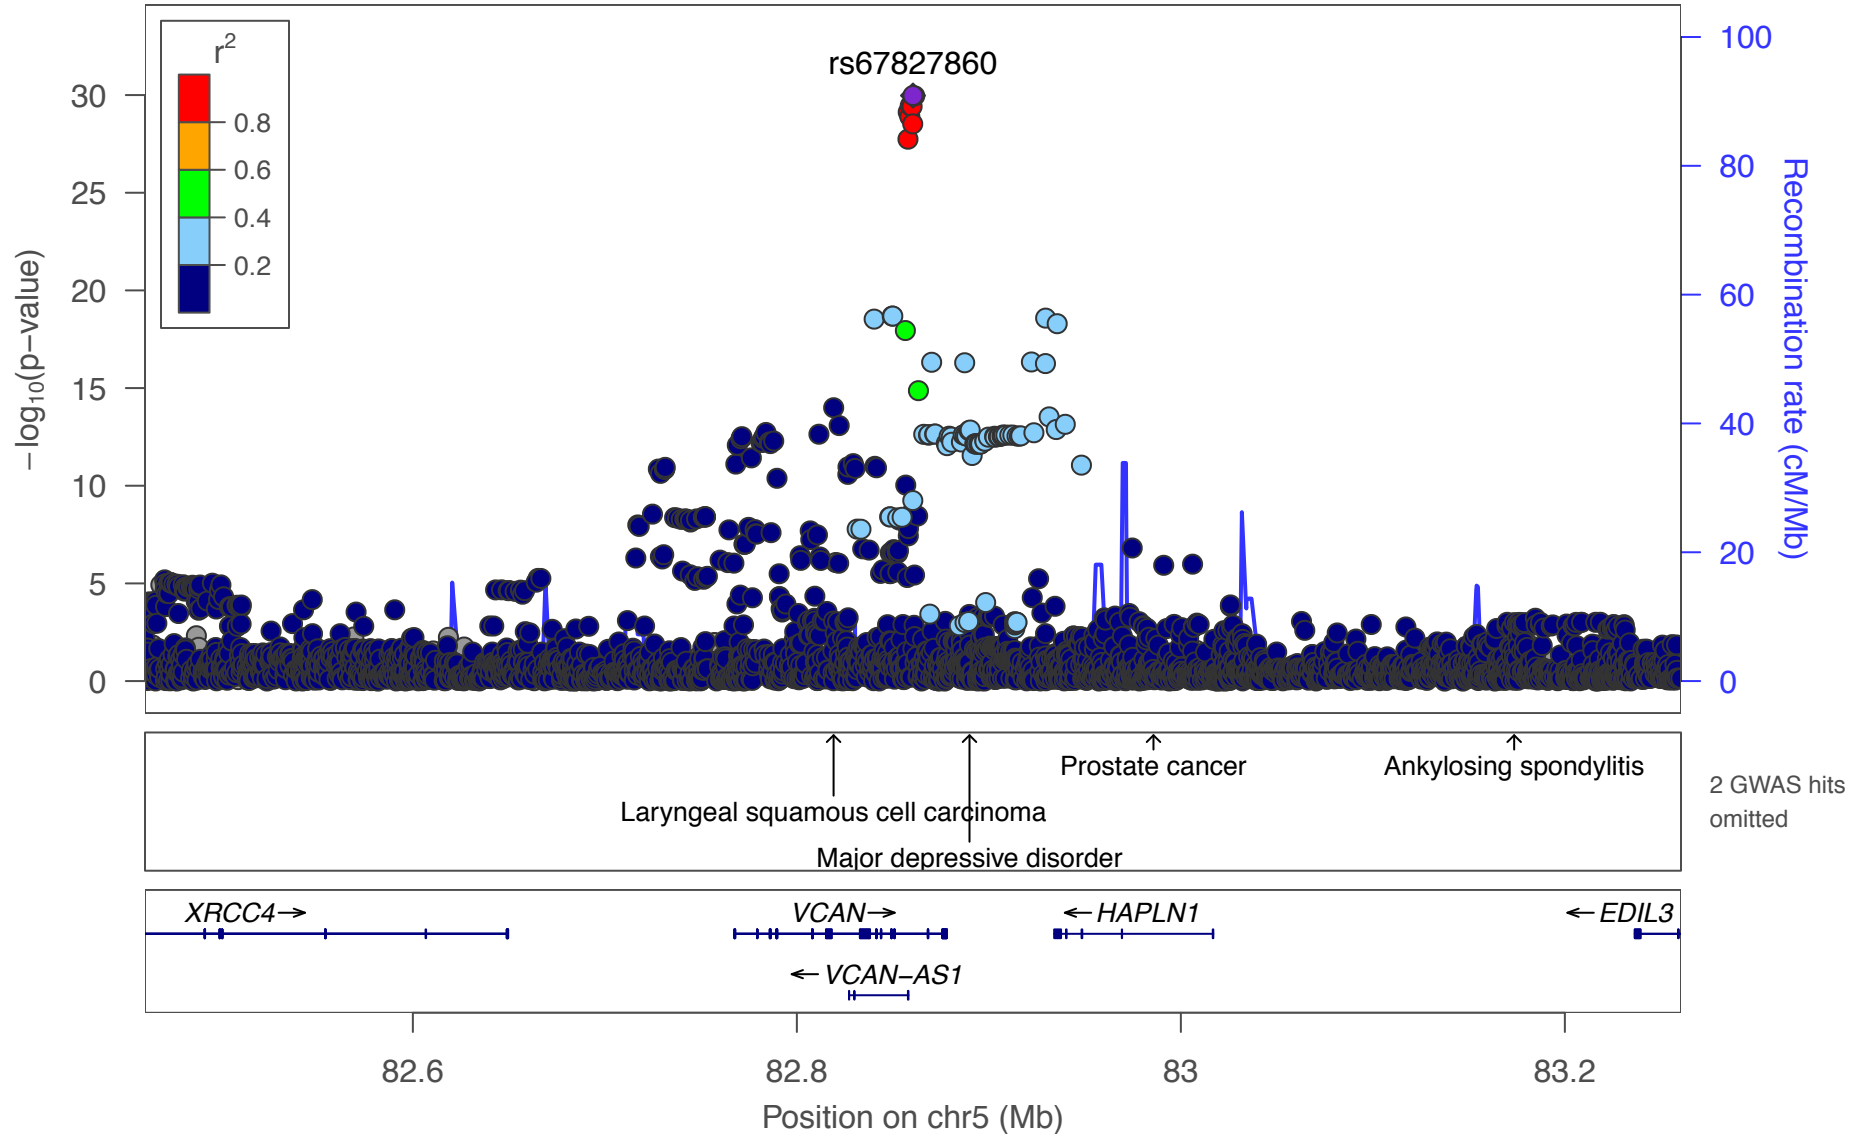

date: Thu Aug 17 17:52:01 2017

build: hg19

display range: chr5:82460485–83260485 [82460485–83260485]

hilite range: 0 – 0 [ 0 – 0 ]

reference SNP: chr5:82860485

number of SNPs plotted: 3393

min P.value: 1.06E–30 [chr5:82860485]

max P.value: 9.99E–1 [chr5:82581810]

omitted GWAS Hits: NA, NA

## GWAS Catalog SNPs in Region

| <b>chr</b> | <b>pos (Mb)</b> | <b>trait</b>                      | <b>snp</b> |
|------------|-----------------|-----------------------------------|------------|
| 5          | 82.81912        | Laryngeal squamous cell carcinoma | rs310518   |
| 5          | 82.84549        | Diisocyanate-induced asthma       | rs3852186  |
| 5          | 82.88991        | Major depressive disorder         | rs310501   |
| 5          | 82.96073        | Visceral fat                      | rs3846635  |
| 5          | 82.98574        | Prostate cancer                   | rs4466137  |
| 5          | 83.17359        | Ankylosing spondylitis            | rs4552569  |

# ProbtrackX\_ICVF\_ilf\_r

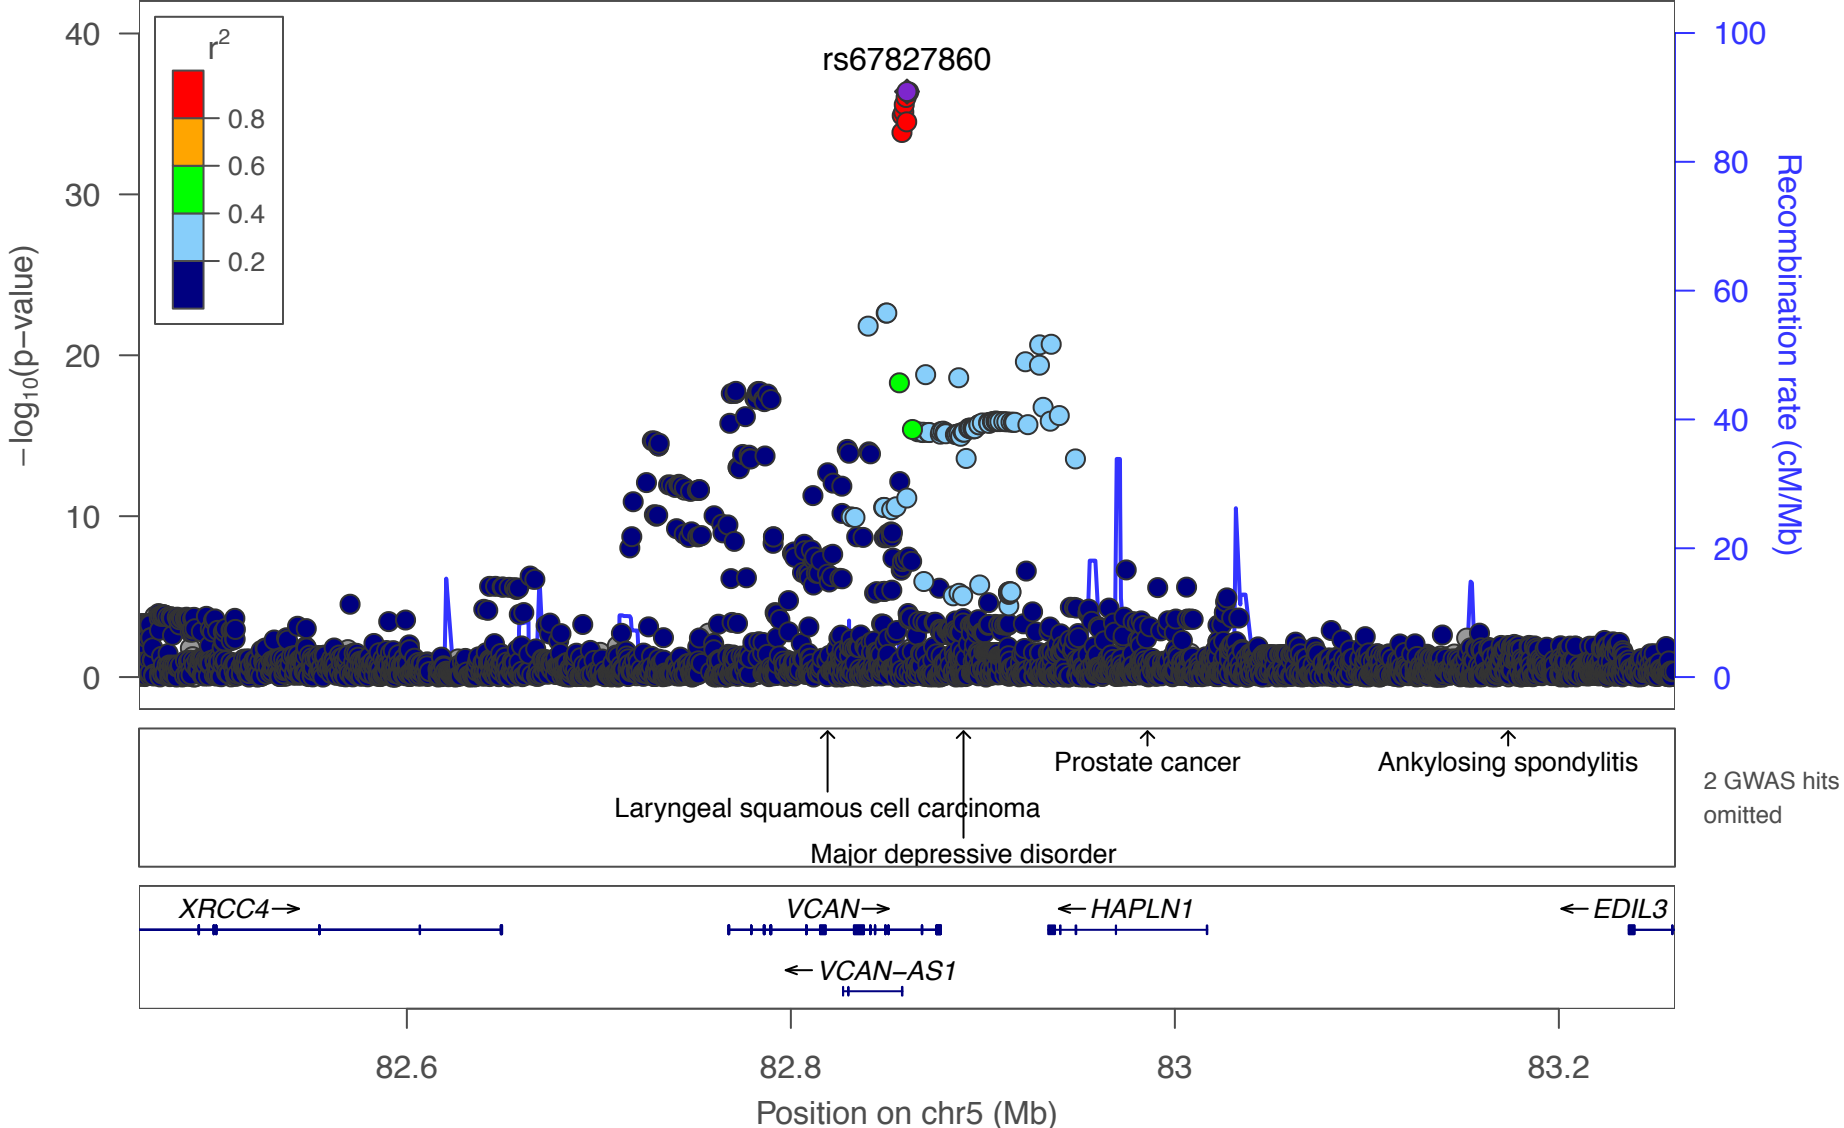

date: Thu Aug 17 17:52:01 2017

build: hg19

display range: chr5:82460485–83260485 [82460485–83260485]

hilite range: 0 – 0 [ 0 – 0 ]

reference SNP: chr5:82860485

number of SNPs plotted: 3393

min P.value: 4.06E–37 [chr5:82860485]

max P.value: 9.99E–1 [chr5:82522233]

omitted GWAS Hits: NA, NA

## GWAS Catalog SNPs in Region

| <b>chr</b> | <b>pos (Mb)</b> | <b>trait</b>                      | <b>snp</b> |
|------------|-----------------|-----------------------------------|------------|
| 5          | 82.81912        | Laryngeal squamous cell carcinoma | rs310518   |
| 5          | 82.84549        | Diisocyanate-induced asthma       | rs3852186  |
| 5          | 82.88991        | Major depressive disorder         | rs310501   |
| 5          | 82.96073        | Visceral fat                      | rs3846635  |
| 5          | 82.98574        | Prostate cancer                   | rs4466137  |
| 5          | 83.17359        | Ankylosing spondylitis            | rs4552569  |

# ProbtrackX\_ICVF\_ptr\_I

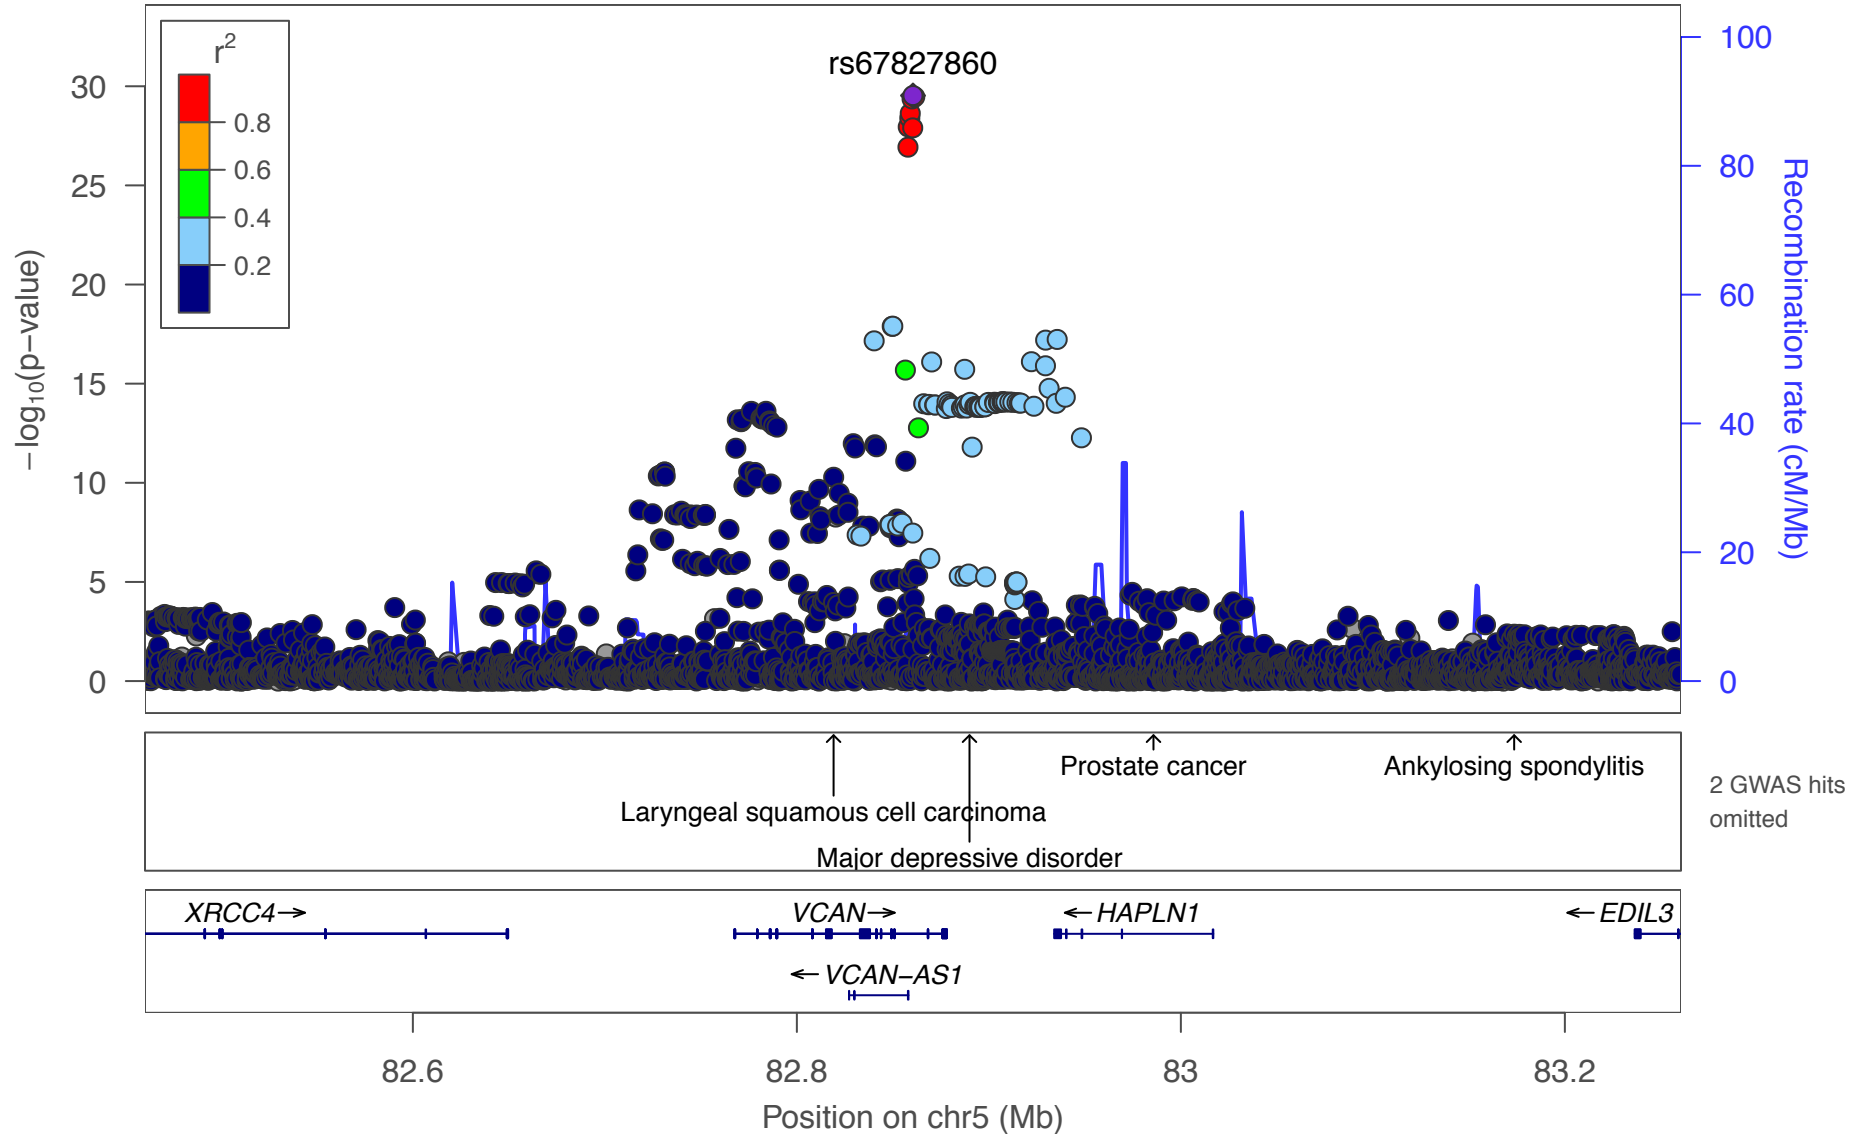



date: Thu Aug 17 17:52:01 2017

build: hg19

display range: chr5:82460485–83260485 [82460485–83260485]

hilite range: 0 – 0 [ 0 – 0 ]

reference SNP: chr5:82860485

number of SNPs plotted: 3393

min P.value: 2.94E–30 [chr5:82860485]

max P.value: 10E–1 [chr5:82633011]

omitted GWAS Hits: NA, NA

## GWAS Catalog SNPs in Region

| <b>chr</b> | <b>pos (Mb)</b> | <b>trait</b>                      | <b>snp</b> |
|------------|-----------------|-----------------------------------|------------|
| 5          | 82.81912        | Laryngeal squamous cell carcinoma | rs310518   |
| 5          | 82.84549        | Diisocyanate-induced asthma       | rs3852186  |
| 5          | 82.88991        | Major depressive disorder         | rs310501   |
| 5          | 82.96073        | Visceral fat                      | rs3846635  |
| 5          | 82.98574        | Prostate cancer                   | rs4466137  |
| 5          | 83.17359        | Ankylosing spondylitis            | rs4552569  |

# ProbtrackX\_ICVF\_slf\_r

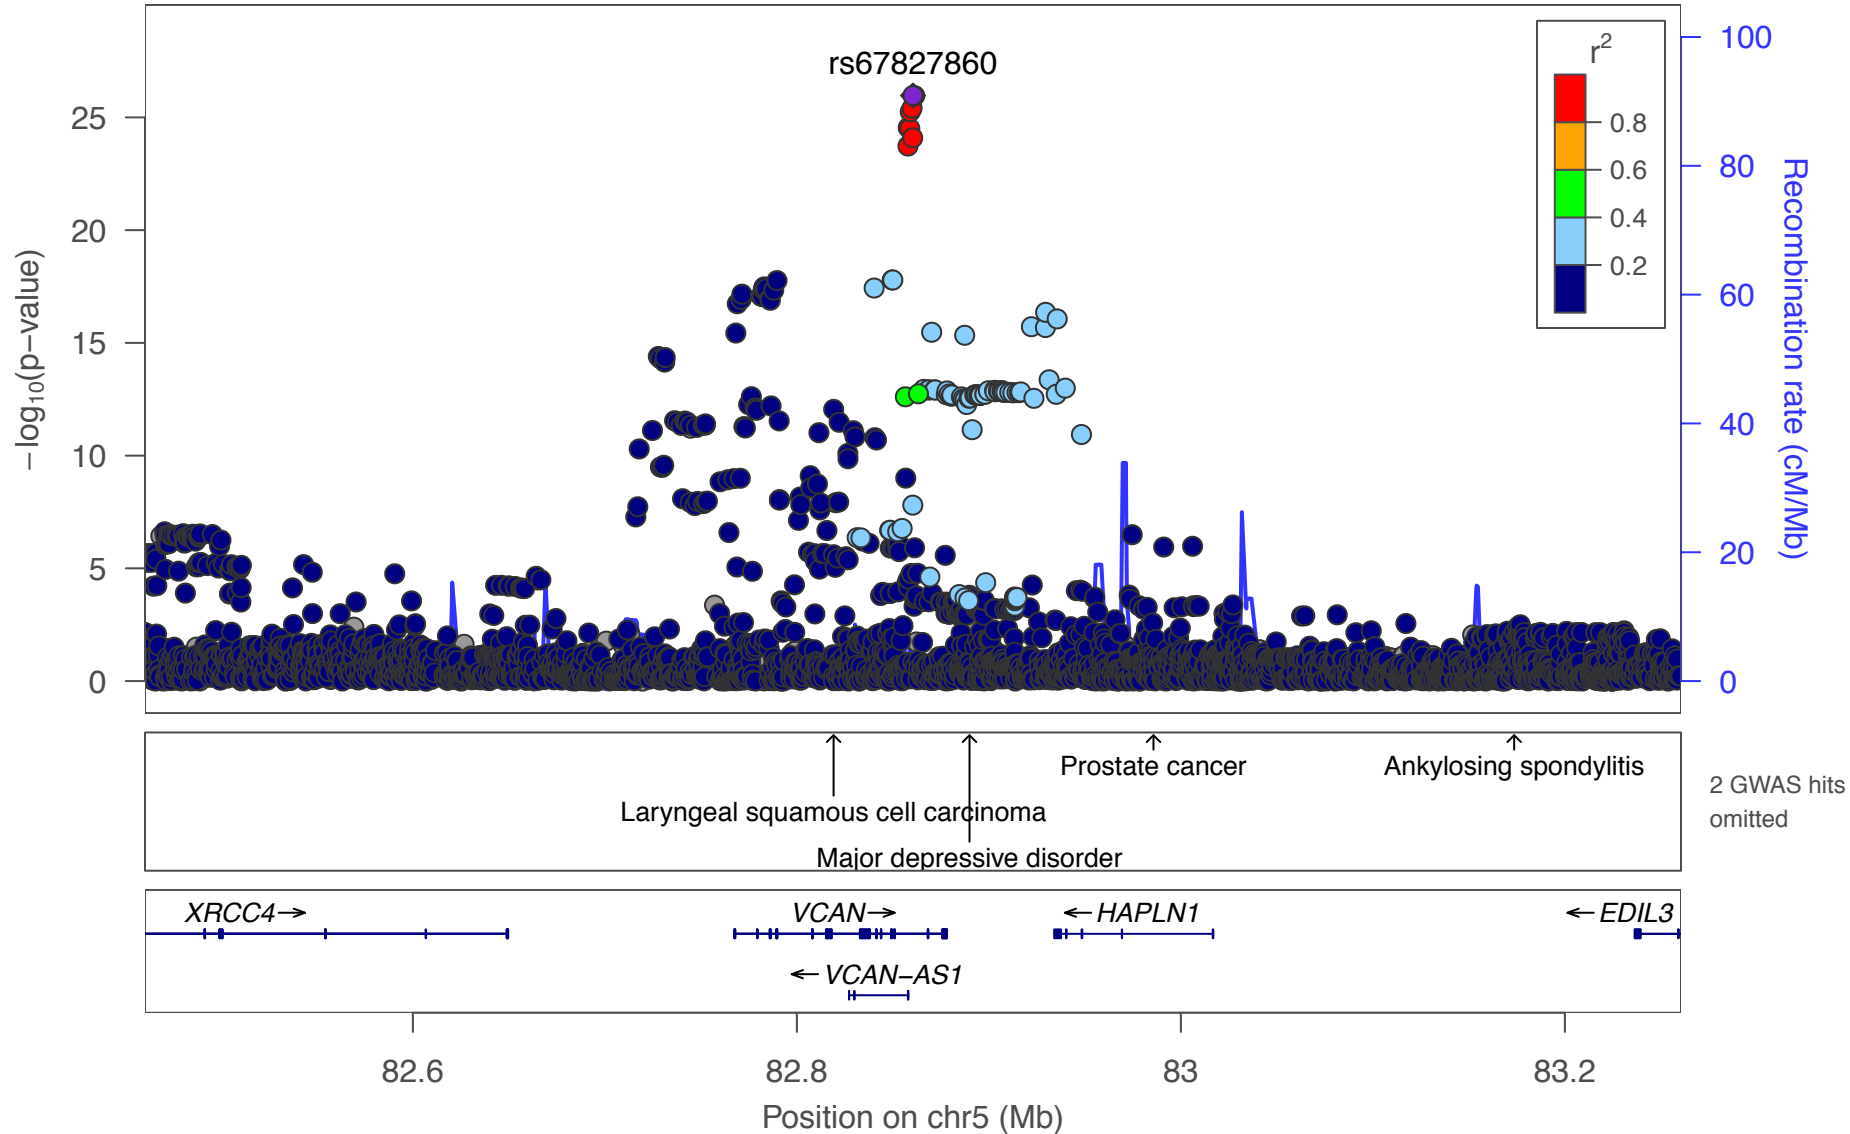

date: Thu Aug 17 17:52:01 2017

build: hg19

display range: chr5:82460485–83260485 [82460485–83260485]

hilite range: 0 – 0 [ 0 – 0 ]

reference SNP: chr5:82860485

number of SNPs plotted: 3393

min P.value: 1.07E–26 [chr5:82860485]

max P.value: 10E–1 [chr5:82735475]

omitted GWAS Hits: NA, NA

## GWAS Catalog SNPs in Region

| <b>chr</b> | <b>pos (Mb)</b> | <b>trait</b>                      | <b>snp</b> |
|------------|-----------------|-----------------------------------|------------|
| 5          | 82.81912        | Laryngeal squamous cell carcinoma | rs310518   |
| 5          | 82.84549        | Diisocyanate-induced asthma       | rs3852186  |
| 5          | 82.88991        | Major depressive disorder         | rs310501   |
| 5          | 82.96073        | Visceral fat                      | rs3846635  |
| 5          | 82.98574        | Prostate cancer                   | rs4466137  |
| 5          | 83.17359        | Ankylosing spondylitis            | rs4552569  |

# TBSS\_MD\_Genu\_of\_corpus\_callosum

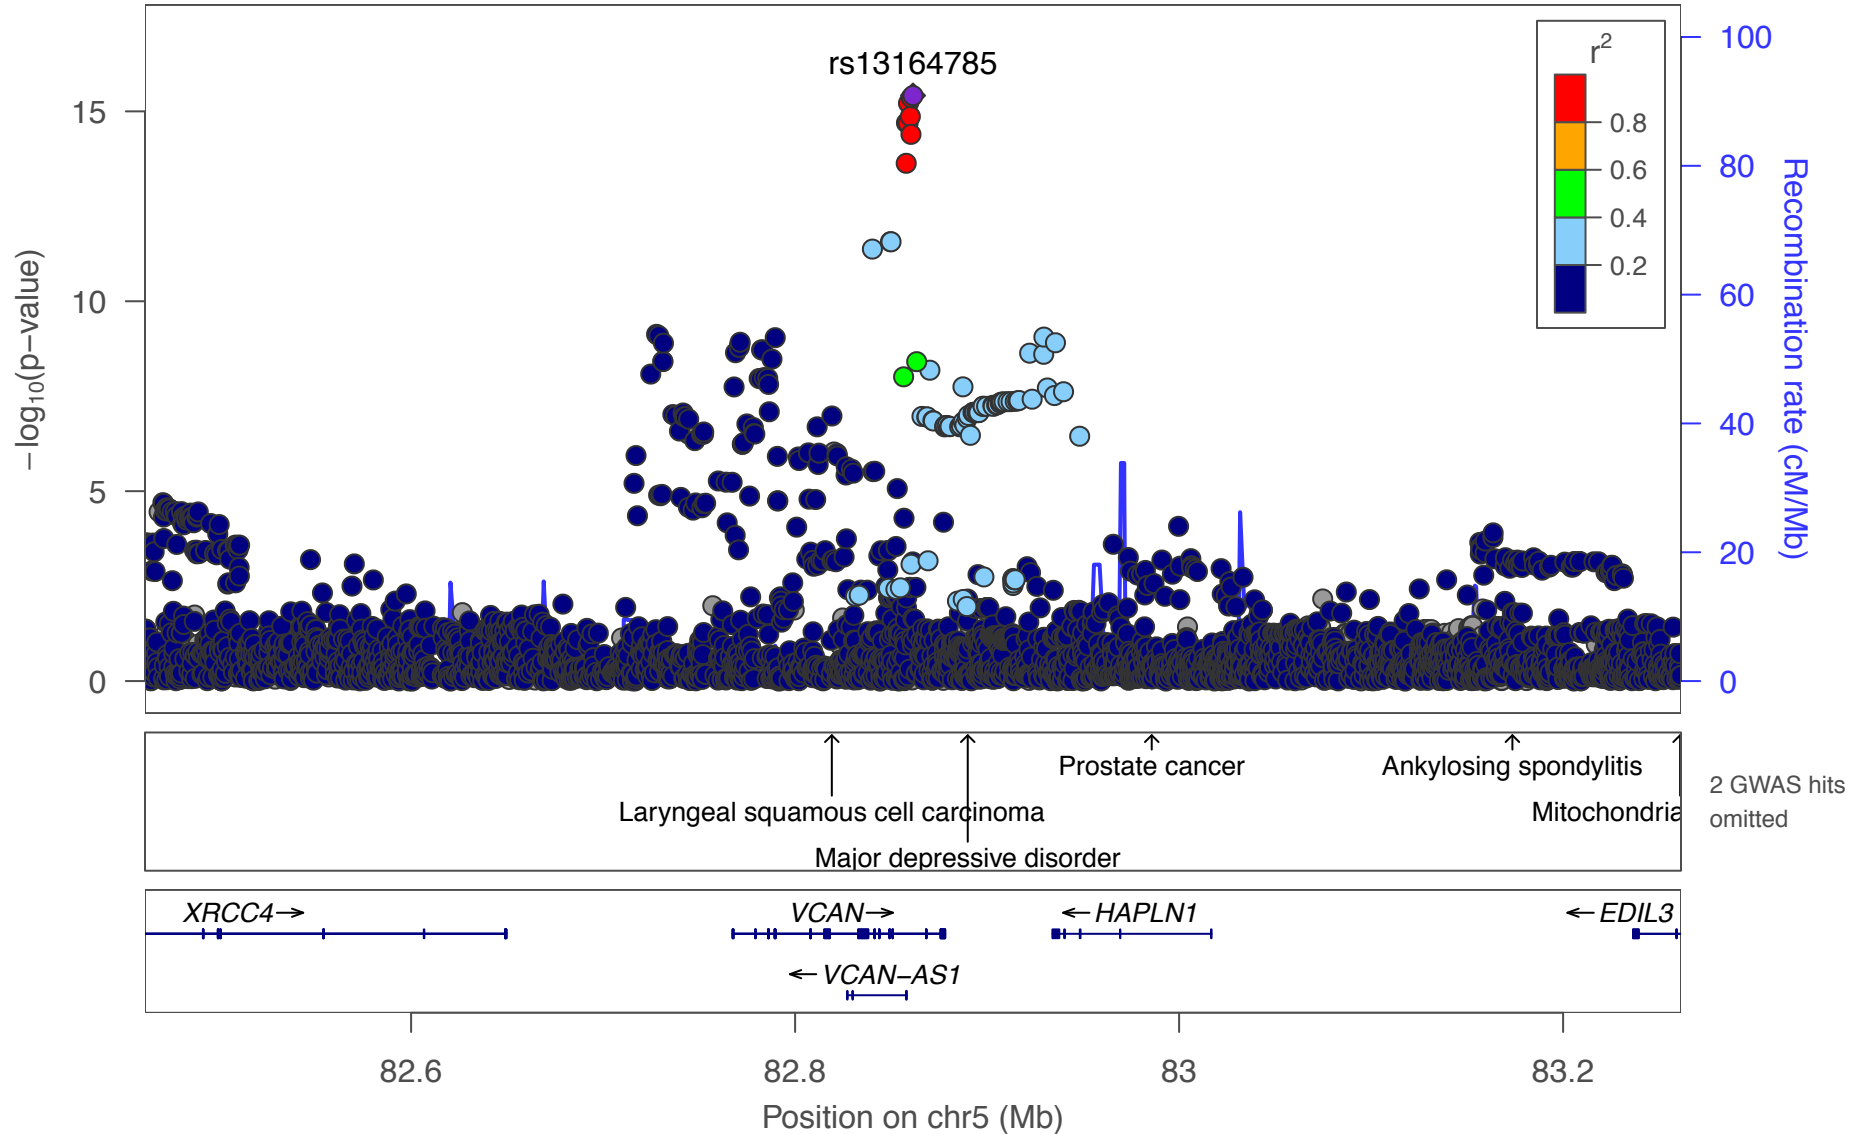

date: Thu Aug 17 17:52:01 2017

build: hg19

display range: chr5:82461400–83261400 [82461400–83261400]

hilite range: 0 – 0 [ 0 – 0 ]

reference SNP: chr5:82861400

number of SNPs plotted: 3396

min P.value: 3.84E–16 [chr5:82861400]

max P.value: 10E–1 [chr5:82791634]

omitted GWAS Hits: chr5:83.260938–Mitochondrial DNA levels, NA

## GWAS Catalog SNPs in Region

| <b>chr</b> | <b>pos (Mb)</b> | <b>trait</b>                      | <b>snp</b> |
|------------|-----------------|-----------------------------------|------------|
| 5          | 82.81912        | Laryngeal squamous cell carcinoma | rs310518   |
| 5          | 82.84549        | Diisocyanate-induced asthma       | rs3852186  |
| 5          | 82.88991        | Major depressive disorder         | rs310501   |
| 5          | 82.96073        | Visceral fat                      | rs3846635  |
| 5          | 82.98574        | Prostate cancer                   | rs4466137  |
| 5          | 83.17359        | Ankylosing spondylitis            | rs4552569  |
| 5          | 83.26094        | Mitochondrial DNA levels          | rs2301070  |



# TBSS\_MD\_Anterior\_corona\_radiata\_R

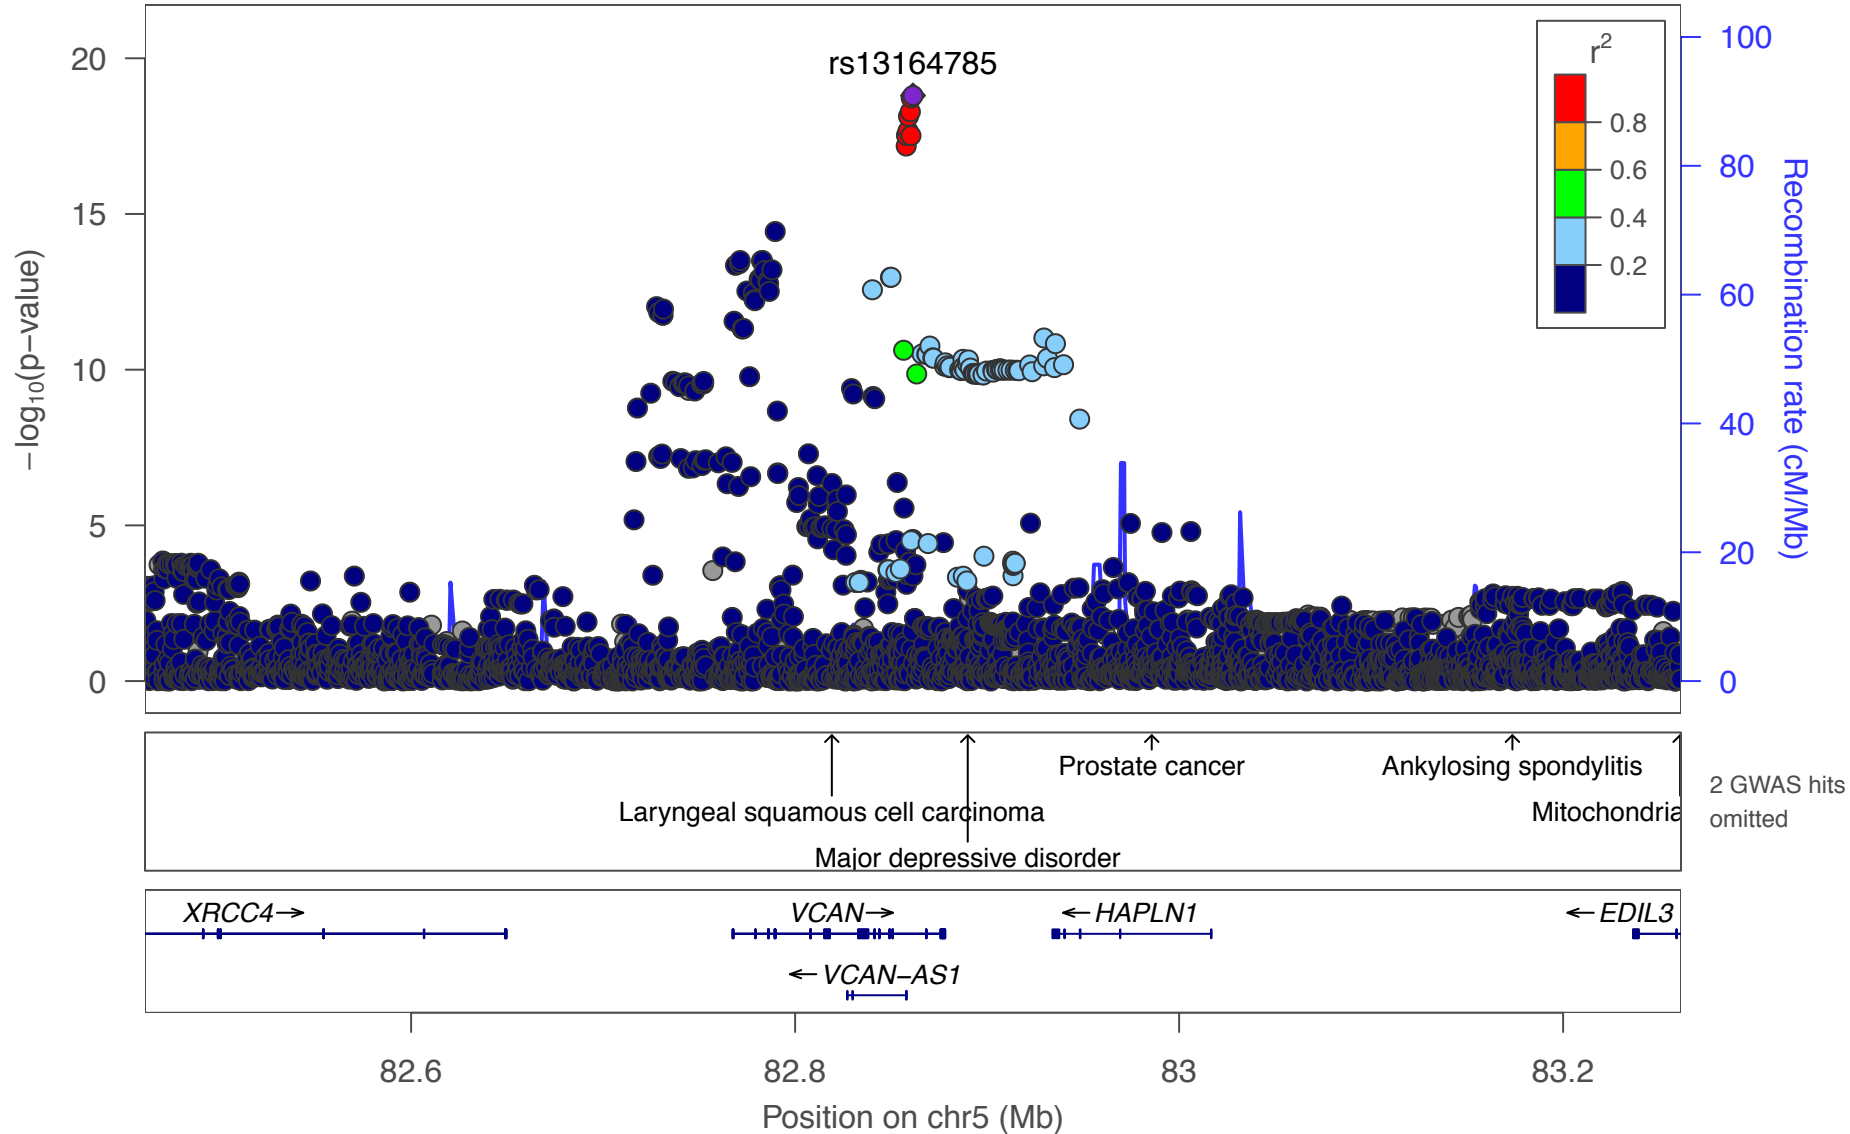

date: Thu Aug 17 17:52:01 2017

build: hg19

display range: chr5:82461400–83261400 [82461400–83261400]

hilite range: 0 – 0 [ 0 – 0 ]

reference SNP: chr5:82861400

number of SNPs plotted: 3396

min P.value: 1.57E–19 [chr5:82861400]

max P.value: 9.99E–1 [chr5:82707560]

omitted GWAS Hits: chr5:83.260938–Mitochondrial DNA levels, NA

## GWAS Catalog SNPs in Region

| <b>chr</b> | <b>pos (Mb)</b> | <b>trait</b>                      | <b>snp</b> |
|------------|-----------------|-----------------------------------|------------|
| 5          | 82.81912        | Laryngeal squamous cell carcinoma | rs310518   |
| 5          | 82.84549        | Diisocyanate-induced asthma       | rs3852186  |
| 5          | 82.88991        | Major depressive disorder         | rs310501   |
| 5          | 82.96073        | Visceral fat                      | rs3846635  |
| 5          | 82.98574        | Prostate cancer                   | rs4466137  |
| 5          | 83.17359        | Ankylosing spondylitis            | rs4552569  |
| 5          | 83.26094        | Mitochondrial DNA levels          | rs2301070  |

# TBSS\_MD\_Anterior\_corona\_radiata\_L

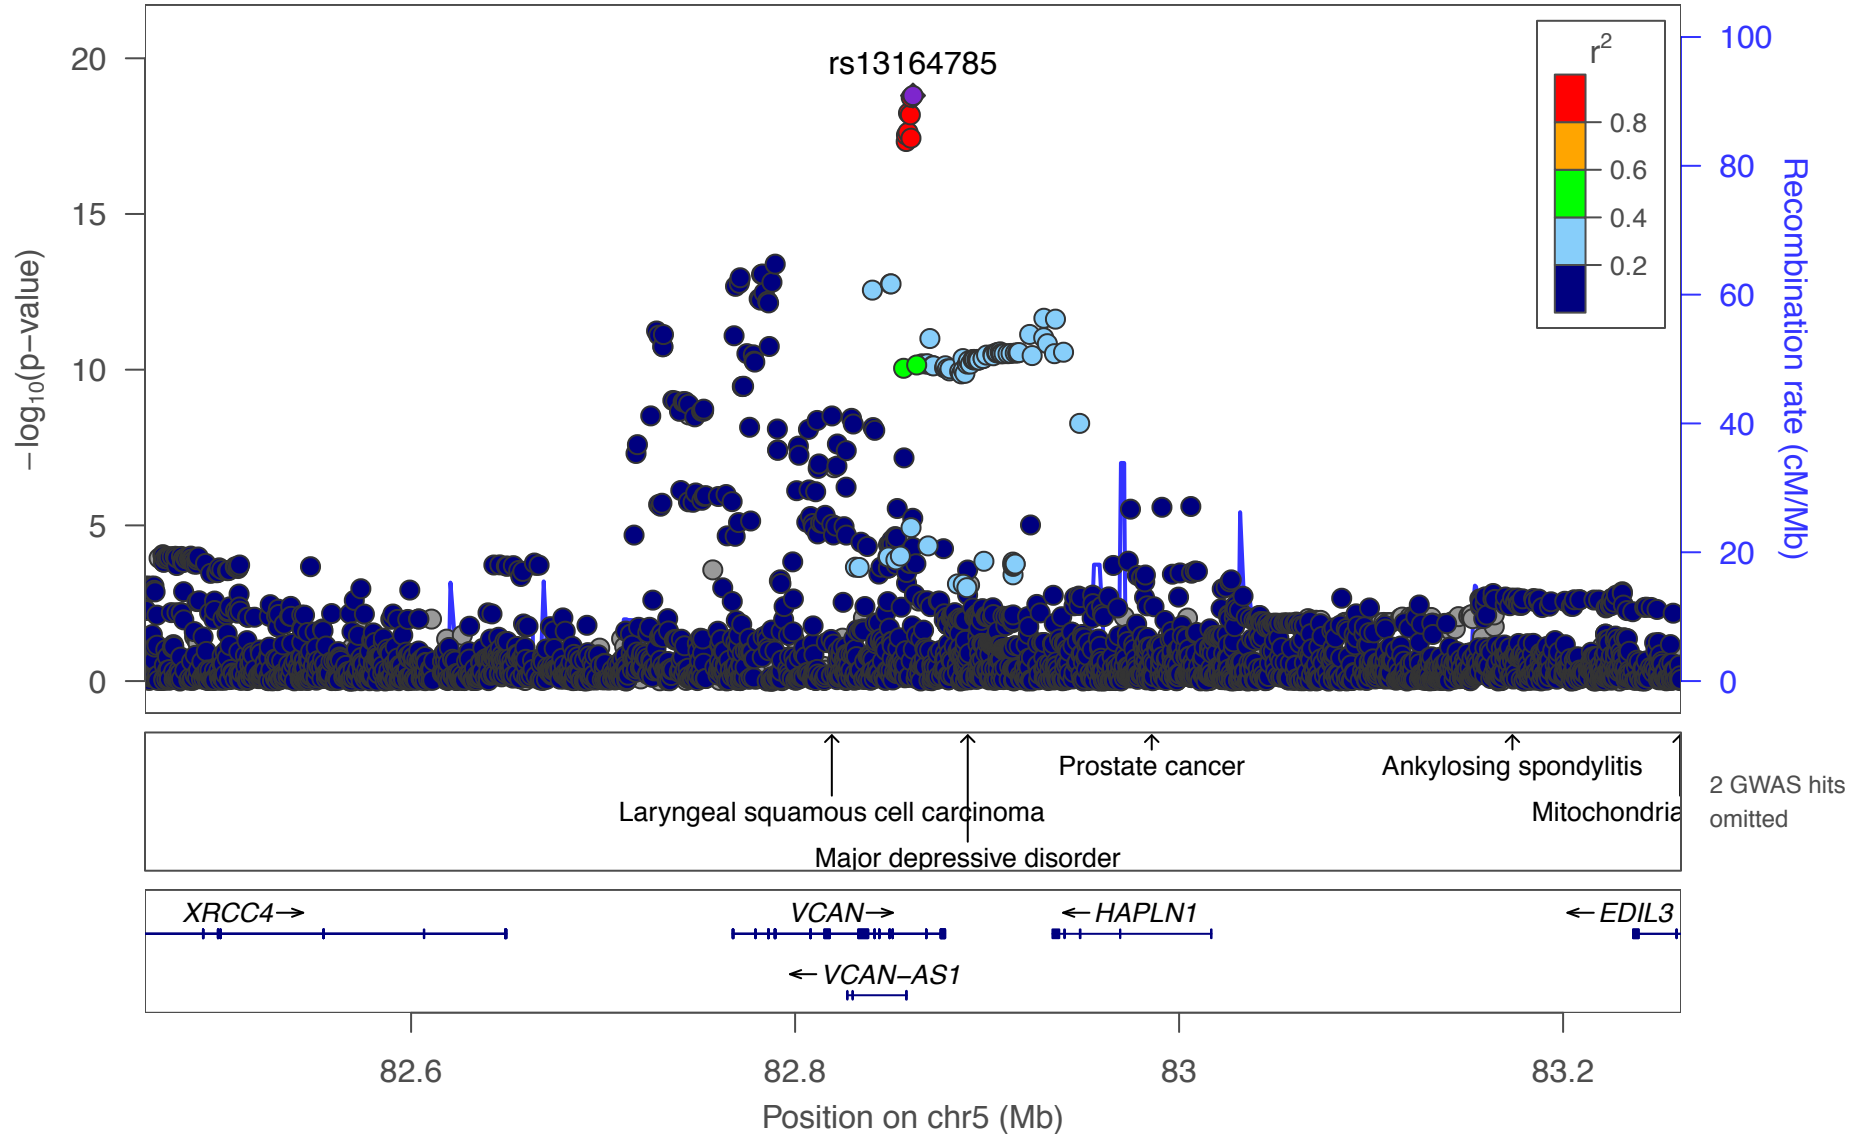

date: Thu Aug 17 17:52:01 2017

build: hg19

display range: chr5:82461400–83261400 [82461400–83261400]

hilite range: 0 – 0 [ 0 – 0 ]

reference SNP: chr5:82861400

number of SNPs plotted: 3396

min P.value: 1.57E–19 [chr5:82861400]

max P.value: 9.99E–1 [chr5:83077850]

omitted GWAS Hits: chr5:83.260938–Mitochondrial DNA levels, NA

## GWAS Catalog SNPs in Region

| <b>chr</b> | <b>pos (Mb)</b> | <b>trait</b>                      | <b>snp</b> |
|------------|-----------------|-----------------------------------|------------|
| 5          | 82.81912        | Laryngeal squamous cell carcinoma | rs310518   |
| 5          | 82.84549        | Diisocyanate-induced asthma       | rs3852186  |
| 5          | 82.88991        | Major depressive disorder         | rs310501   |
| 5          | 82.96073        | Visceral fat                      | rs3846635  |
| 5          | 82.98574        | Prostate cancer                   | rs4466137  |
| 5          | 83.17359        | Ankylosing spondylitis            | rs4552569  |
| 5          | 83.26094        | Mitochondrial DNA levels          | rs2301070  |

# TBSS\_MD\_Superior\_corona\_radiata\_R

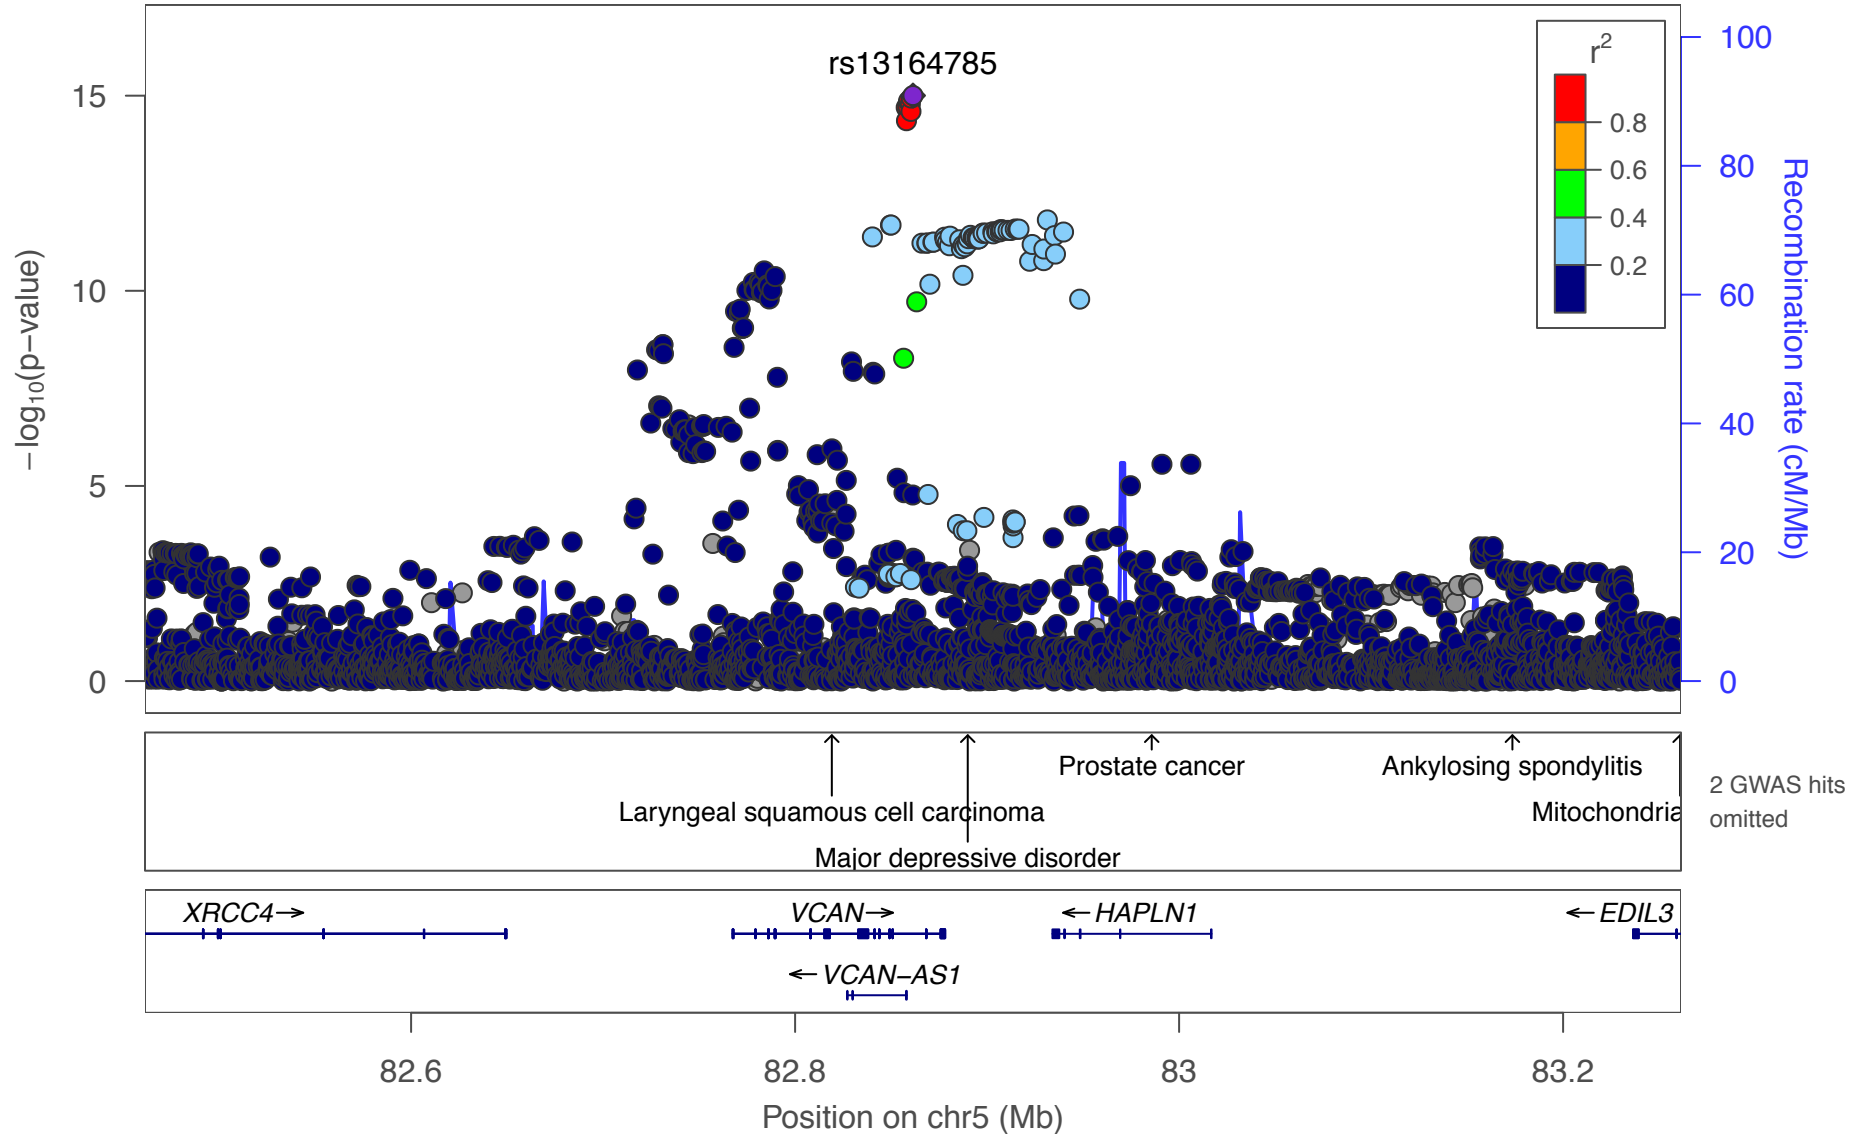

date: Thu Aug 17 17:52:01 2017

build: hg19

display range: chr5:82461400–83261400 [82461400–83261400]

hilite range: 0 – 0 [ 0 – 0 ]

reference SNP: chr5:82861400

number of SNPs plotted: 3396

min P.value: 9.93E–16 [chr5:82861400]

max P.value: 9.99E–1 [chr5:82693995]

omitted GWAS Hits: chr5:83.260938–Mitochondrial DNA levels, NA



## GWAS Catalog SNPs in Region

| <b>chr</b> | <b>pos (Mb)</b> | <b>trait</b>                      | <b>snp</b> |
|------------|-----------------|-----------------------------------|------------|
| 5          | 82.81912        | Laryngeal squamous cell carcinoma | rs310518   |
| 5          | 82.84549        | Diisocyanate-induced asthma       | rs3852186  |
| 5          | 82.88991        | Major depressive disorder         | rs310501   |
| 5          | 82.96073        | Visceral fat                      | rs3846635  |
| 5          | 82.98574        | Prostate cancer                   | rs4466137  |
| 5          | 83.17359        | Ankylosing spondylitis            | rs4552569  |
| 5          | 83.26094        | Mitochondrial DNA levels          | rs2301070  |

# TBSS\_MD\_Superior\_corona\_radiata\_L

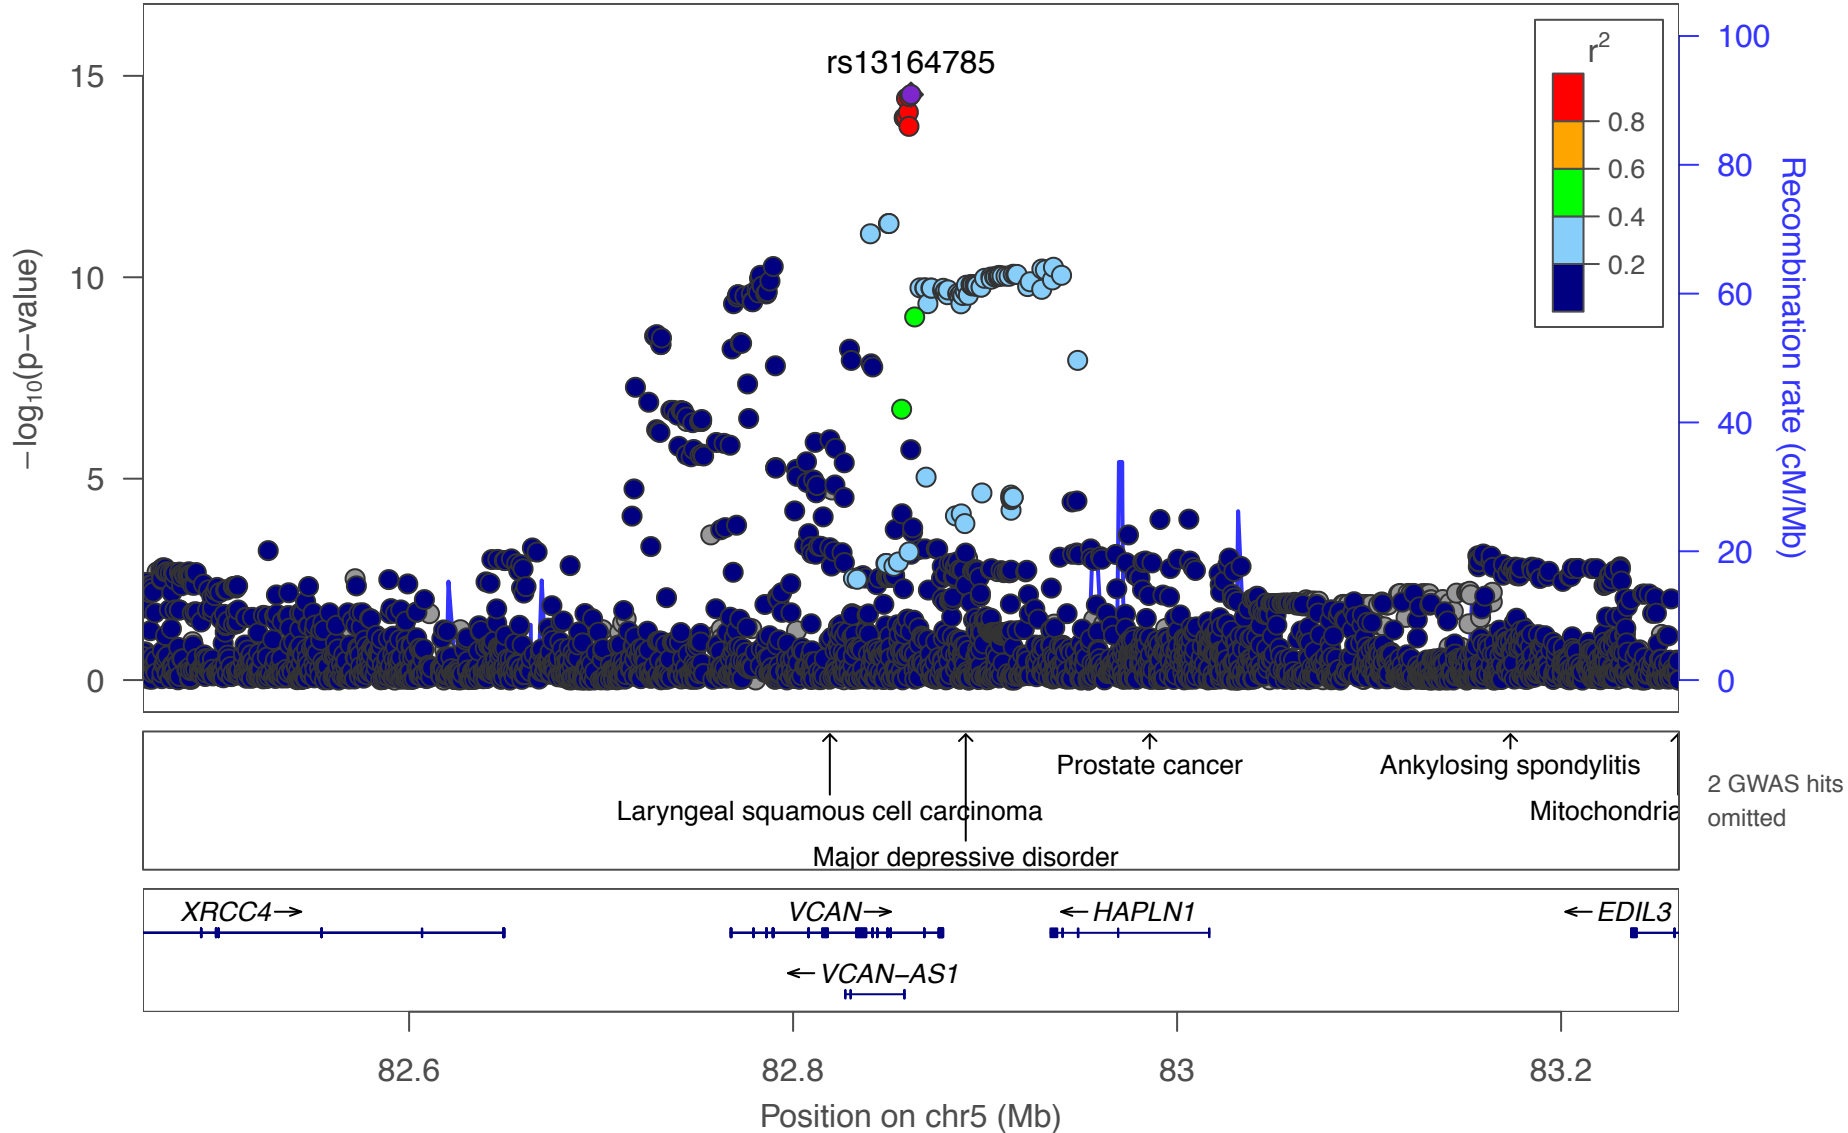

date: Thu Aug 17 17:52:01 2017

build: hg19

display range: chr5:82461400–83261400 [82461400–83261400]

hilite range: 0 – 0 [ 0 – 0 ]

reference SNP: chr5:82861400

number of SNPs plotted: 3396

min P.value: 2.91E–15 [chr5:82861400]

max P.value: 10E–1 [chr5:83211071]

omitted GWAS Hits: chr5:83.260938–Mitochondrial DNA levels, NA

## GWAS Catalog SNPs in Region

| <b>chr</b> | <b>pos (Mb)</b> | <b>trait</b>                      | <b>snp</b> |
|------------|-----------------|-----------------------------------|------------|
| 5          | 82.81912        | Laryngeal squamous cell carcinoma | rs310518   |
| 5          | 82.84549        | Diisocyanate-induced asthma       | rs3852186  |
| 5          | 82.88991        | Major depressive disorder         | rs310501   |
| 5          | 82.96073        | Visceral fat                      | rs3846635  |
| 5          | 82.98574        | Prostate cancer                   | rs4466137  |
| 5          | 83.17359        | Ankylosing spondylitis            | rs4552569  |
| 5          | 83.26094        | Mitochondrial DNA levels          | rs2301070  |

# TBSS\_MD\_External\_capsule\_L

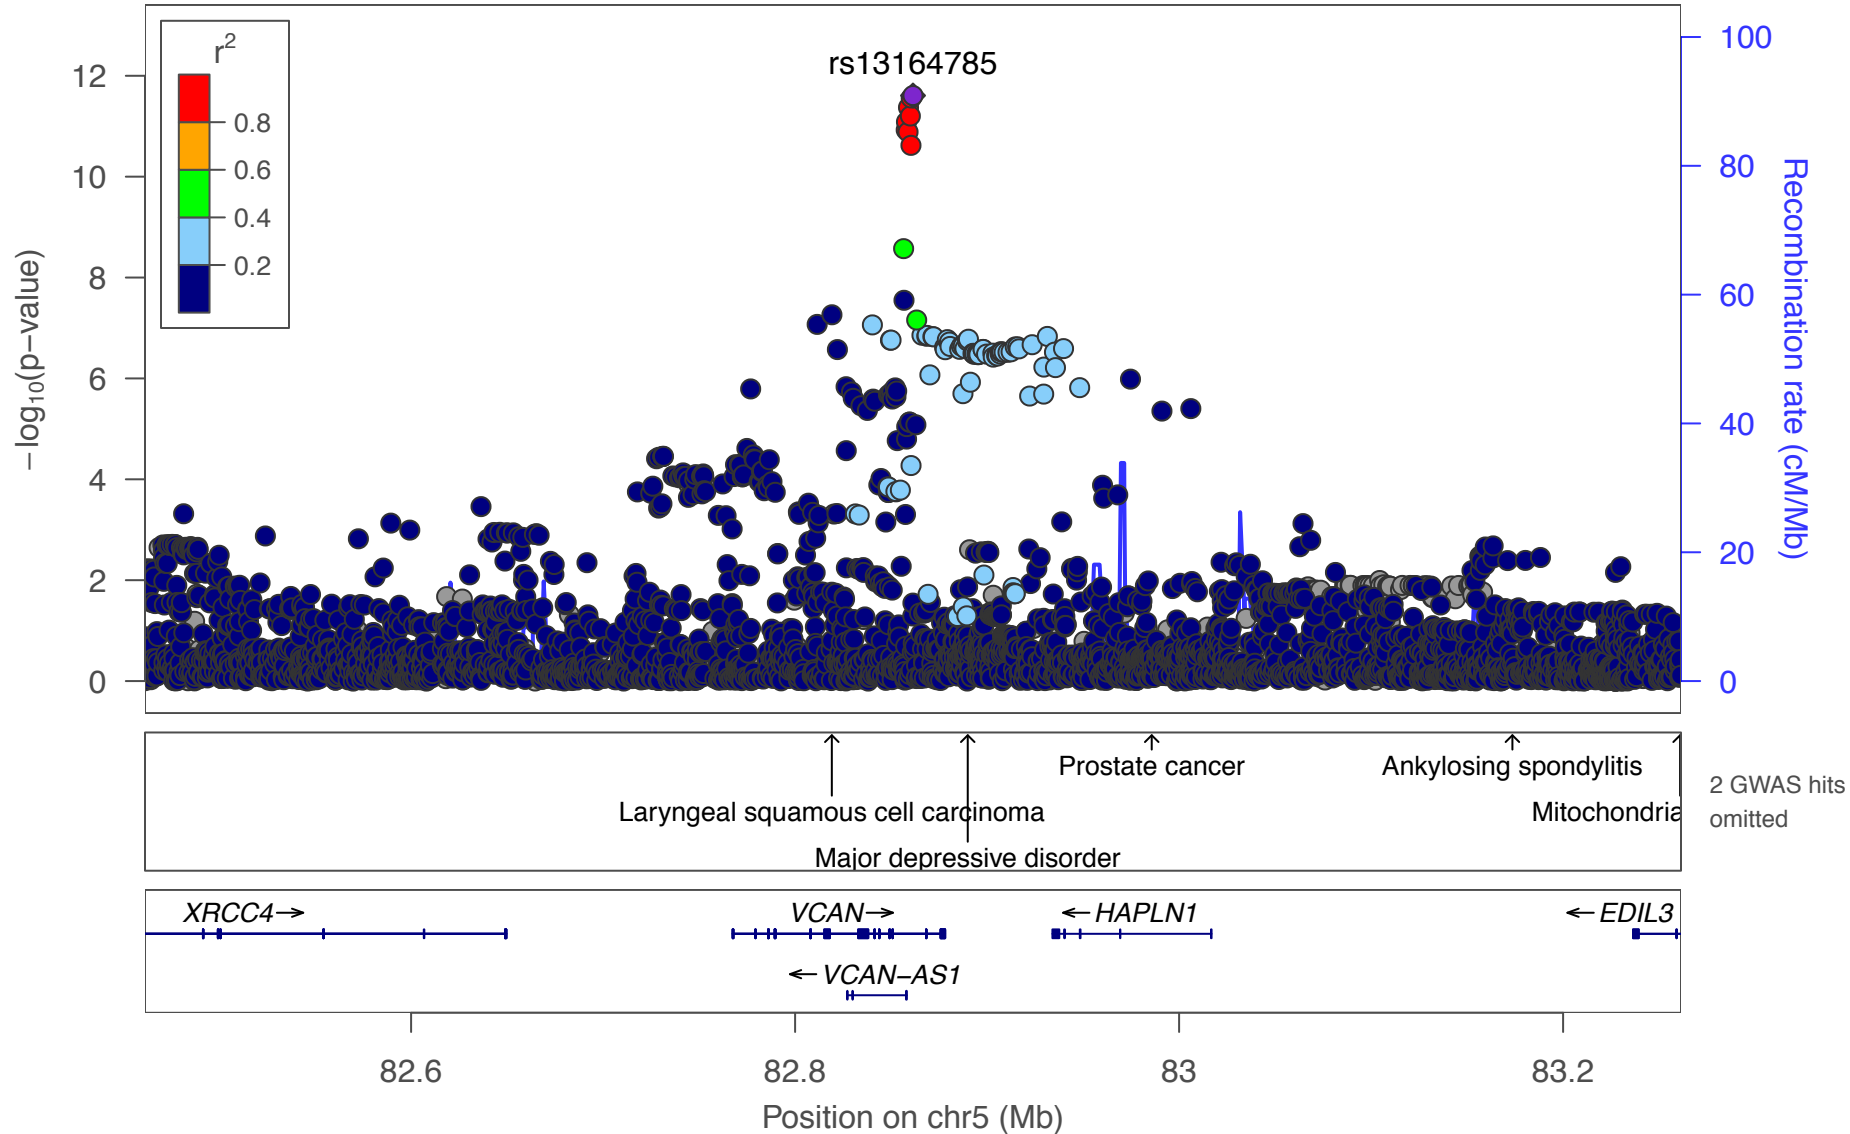

date: Thu Aug 17 17:52:01 2017

build: hg19

display range: chr5:82461400–83261400 [82461400–83261400]

hilite range: 0 – 0 [ 0 – 0 ]

reference SNP: chr5:82861400

number of SNPs plotted: 3396

min P.value: 2.47E–12 [chr5:82861400]

max P.value: 9.99E–1 [chr5:83227196]

omitted GWAS Hits: chr5:83.260938–Mitochondrial DNA levels, NA

## GWAS Catalog SNPs in Region

| <b>chr</b> | <b>pos (Mb)</b> | <b>trait</b>                      | <b>snp</b> |
|------------|-----------------|-----------------------------------|------------|
| 5          | 82.81912        | Laryngeal squamous cell carcinoma | rs310518   |
| 5          | 82.84549        | Diisocyanate-induced asthma       | rs3852186  |
| 5          | 82.88991        | Major depressive disorder         | rs310501   |
| 5          | 82.96073        | Visceral fat                      | rs3846635  |
| 5          | 82.98574        | Prostate cancer                   | rs4466137  |
| 5          | 83.17359        | Ankylosing spondylitis            | rs4552569  |
| 5          | 83.26094        | Mitochondrial DNA levels          | rs2301070  |

# TBSS\_MD\_Cingulum\_cingulate\_gyrus\_R

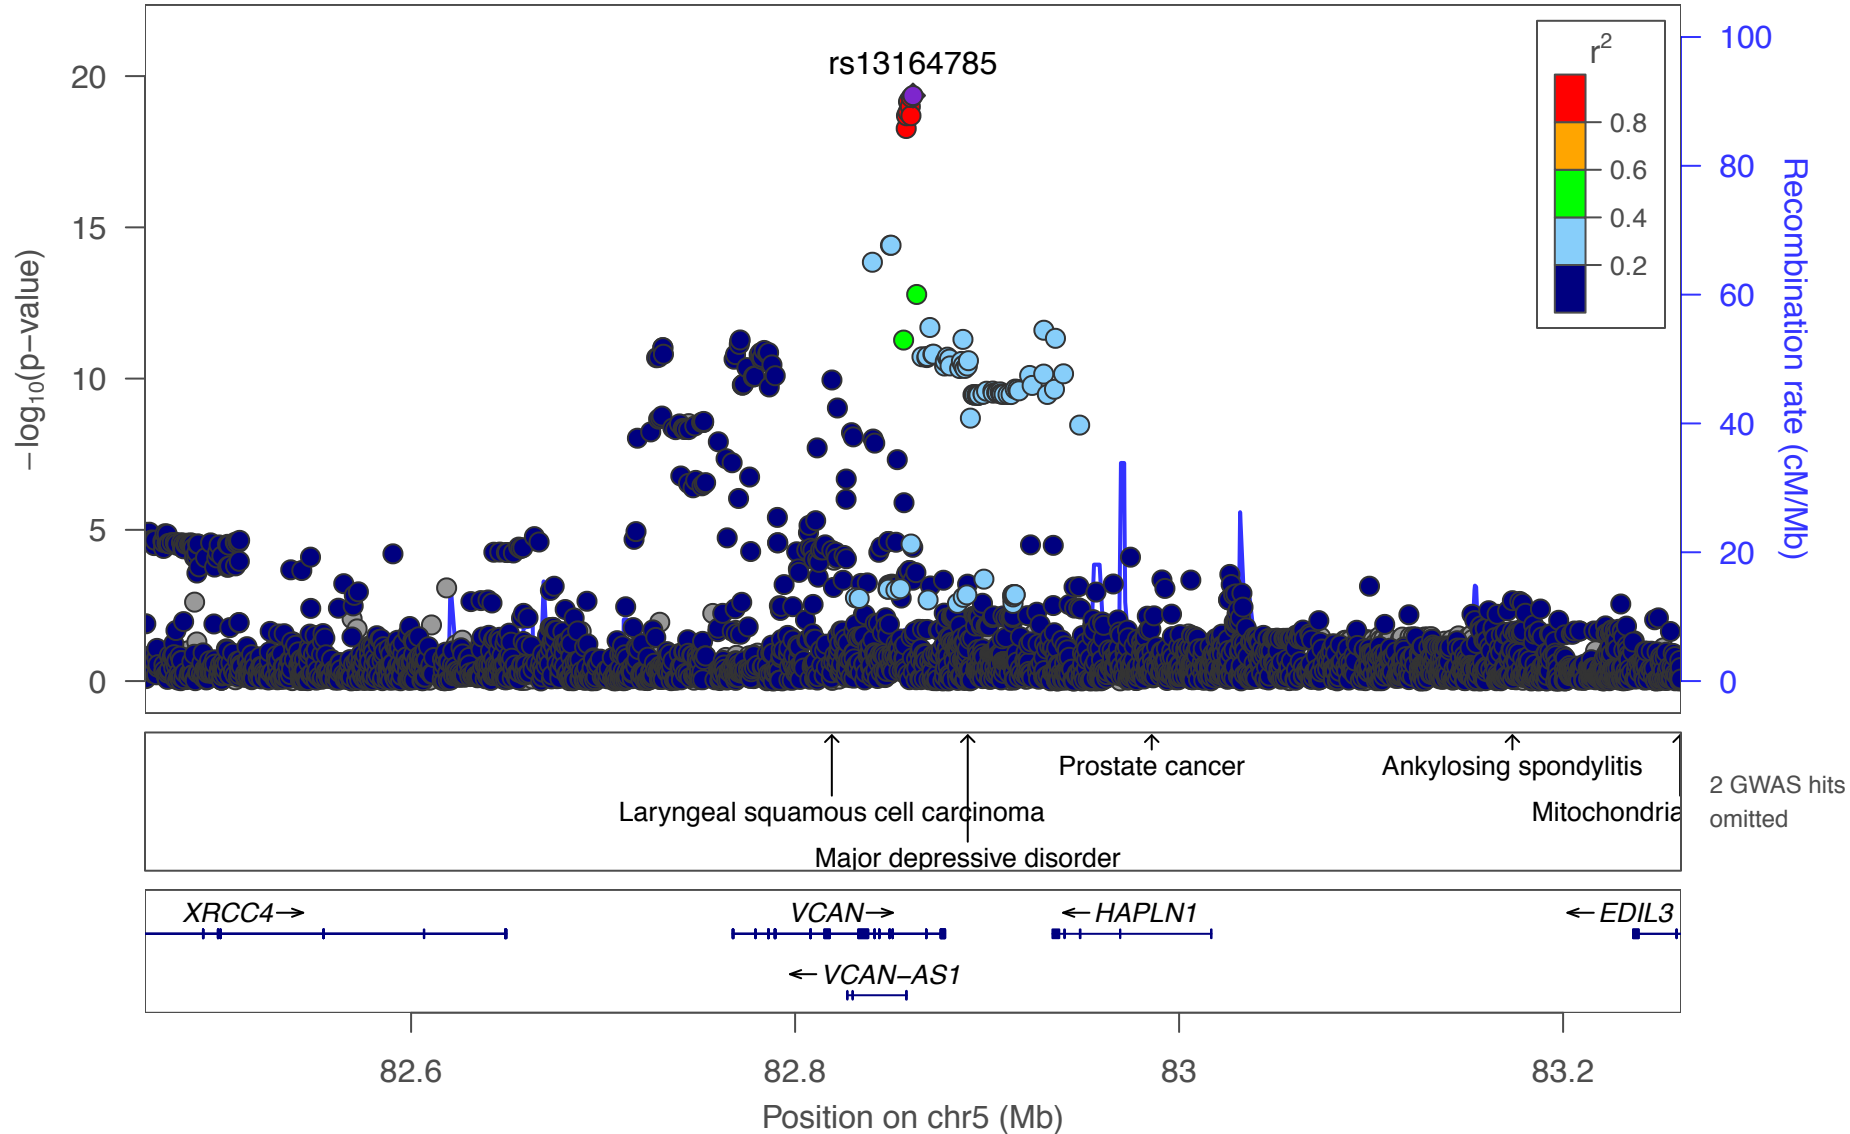



date: Thu Aug 17 17:52:01 2017

build: hg19

display range: chr5:82461400–83261400 [82461400–83261400]

hilite range: 0 – 0 [ 0 – 0 ]

reference SNP: chr5:82861400

number of SNPs plotted: 3396

min P.value: 4.4E–20 [chr5:82861400]

max P.value: 10E–1 [chr5:83125888]

omitted GWAS Hits: chr5:83.260938–Mitochondrial DNA levels, NA

## GWAS Catalog SNPs in Region

| <b>chr</b> | <b>pos (Mb)</b> | <b>trait</b>                      | <b>snp</b> |
|------------|-----------------|-----------------------------------|------------|
| 5          | 82.81912        | Laryngeal squamous cell carcinoma | rs310518   |
| 5          | 82.84549        | Diisocyanate-induced asthma       | rs3852186  |
| 5          | 82.88991        | Major depressive disorder         | rs310501   |
| 5          | 82.96073        | Visceral fat                      | rs3846635  |
| 5          | 82.98574        | Prostate cancer                   | rs4466137  |
| 5          | 83.17359        | Ankylosing spondylitis            | rs4552569  |
| 5          | 83.26094        | Mitochondrial DNA levels          | rs2301070  |

# TBSS\_MD\_Cingulum\_cingulate\_gyrus\_L

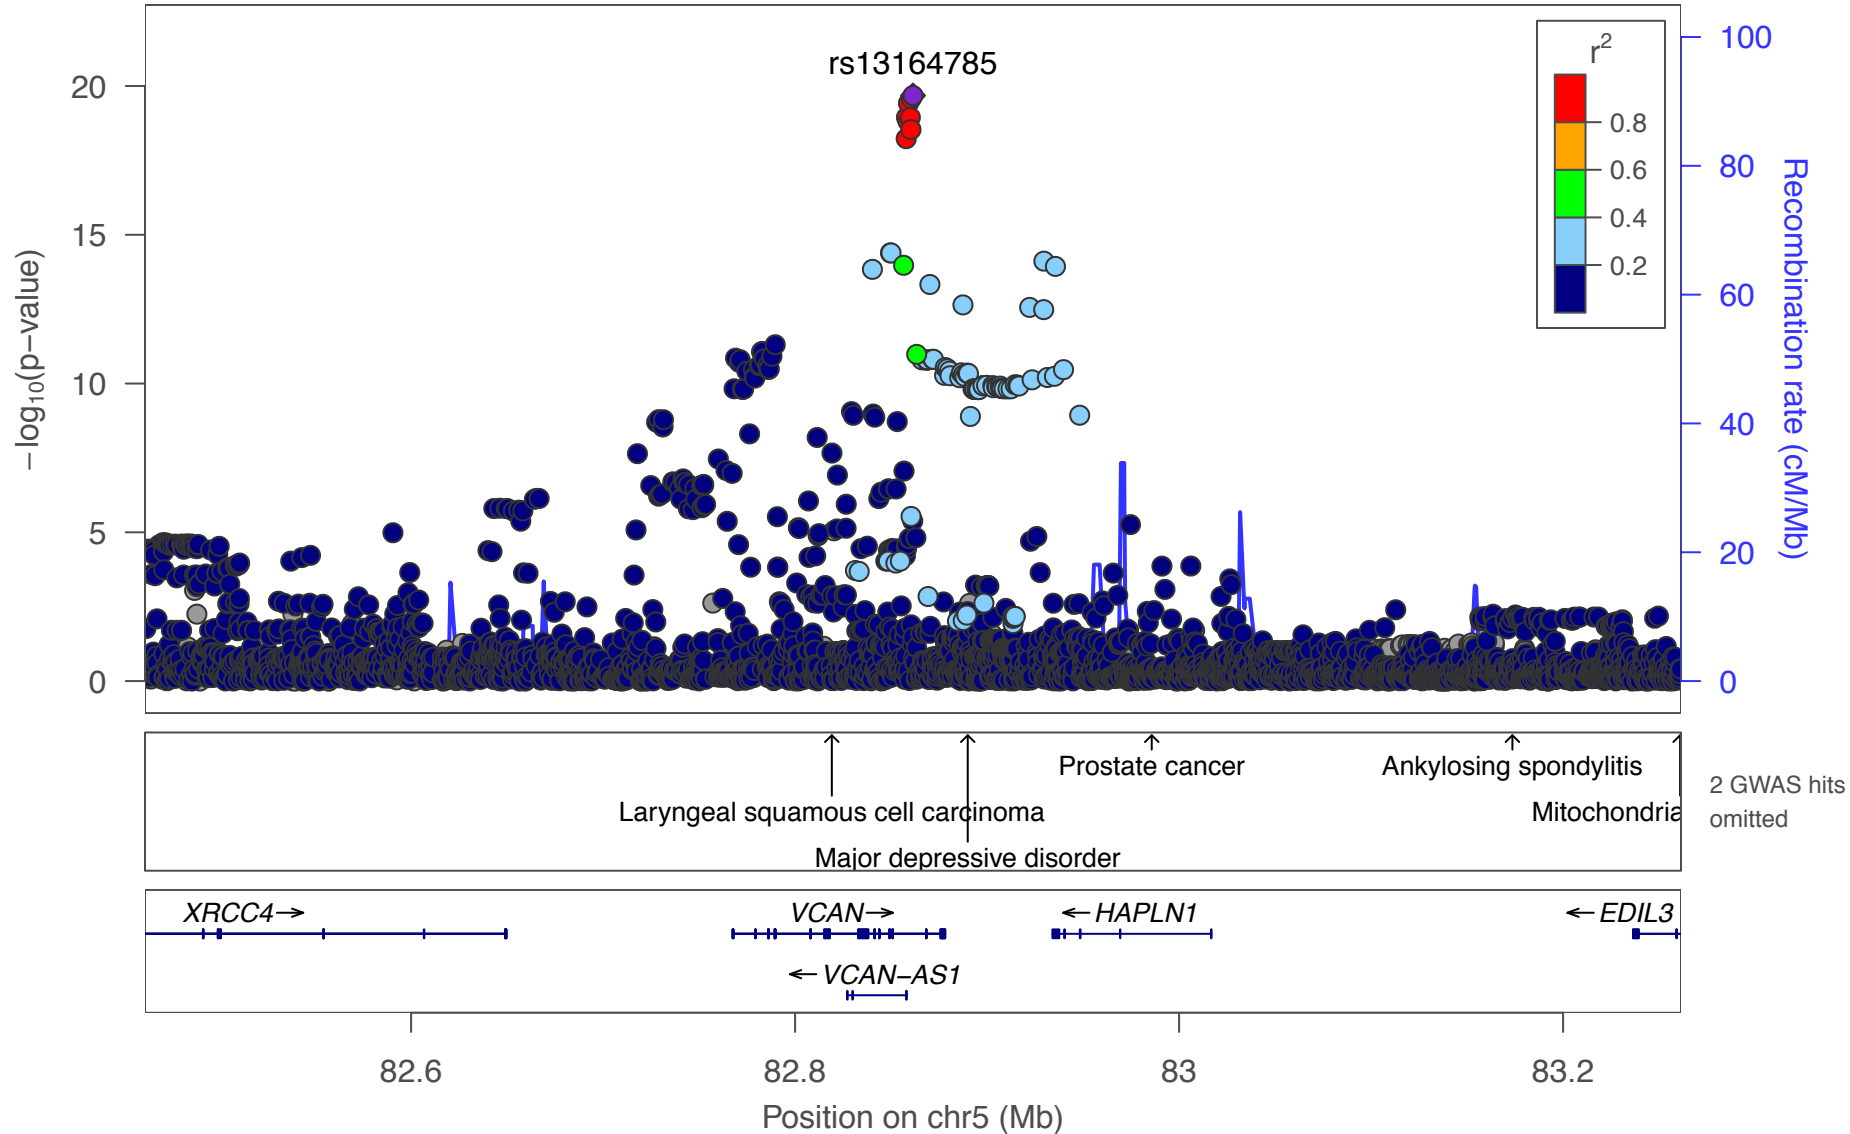

date: Thu Aug 17 17:52:01 2017

build: hg19

display range: chr5:82461400–83261400 [82461400–83261400]

hilite range: 0 – 0 [ 0 – 0 ]

reference SNP: chr5:82861400

number of SNPs plotted: 3396

min P.value: 2.09E–20 [chr5:82861400]

max P.value: 10E–1 [chr5:82557155]

omitted GWAS Hits: chr5:83.260938–Mitochondrial DNA levels, NA

## GWAS Catalog SNPs in Region

| <b>chr</b> | <b>pos (Mb)</b> | <b>trait</b>                      | <b>snp</b> |
|------------|-----------------|-----------------------------------|------------|
| 5          | 82.81912        | Laryngeal squamous cell carcinoma | rs310518   |
| 5          | 82.84549        | Diisocyanate-induced asthma       | rs3852186  |
| 5          | 82.88991        | Major depressive disorder         | rs310501   |
| 5          | 82.96073        | Visceral fat                      | rs3846635  |
| 5          | 82.98574        | Prostate cancer                   | rs4466137  |
| 5          | 83.17359        | Ankylosing spondylitis            | rs4552569  |
| 5          | 83.26094        | Mitochondrial DNA levels          | rs2301070  |

# TBSS\_MD\_Uncinate\_fasciculus\_L

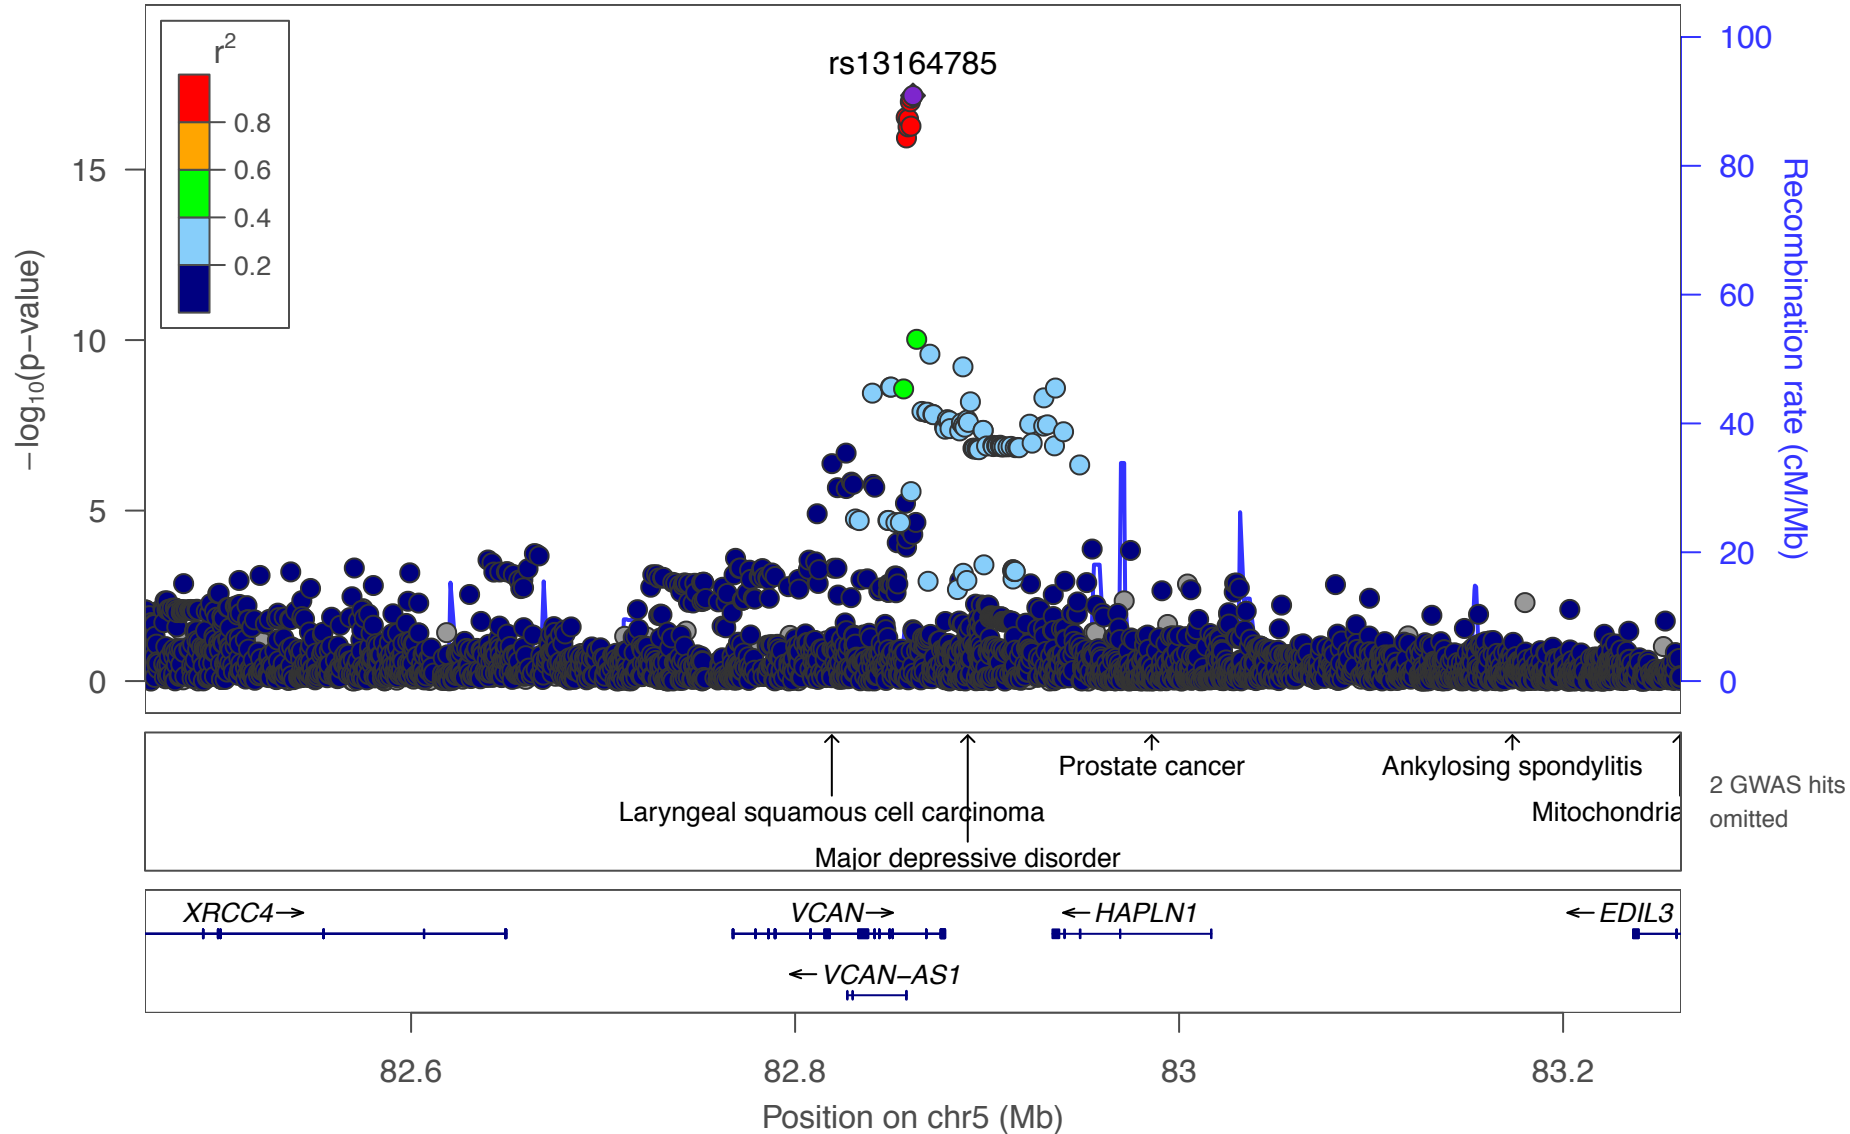

date: Thu Aug 17 17:52:01 2017

build: hg19

display range: chr5:82461400–83261400 [82461400–83261400]

hilite range: 0 – 0 [ 0 – 0 ]

reference SNP: chr5:82861400

number of SNPs plotted: 3396

min P.value: 6.75E–18 [chr5:82861400]

max P.value: 10E–1 [chr5:83191718]

omitted GWAS Hits: chr5:83.260938–Mitochondrial DNA levels, NA

## GWAS Catalog SNPs in Region

| <b>chr</b> | <b>pos (Mb)</b> | <b>trait</b>                      | <b>snp</b> |
|------------|-----------------|-----------------------------------|------------|
| 5          | 82.81912        | Laryngeal squamous cell carcinoma | rs310518   |
| 5          | 82.84549        | Diisocyanate-induced asthma       | rs3852186  |
| 5          | 82.88991        | Major depressive disorder         | rs310501   |
| 5          | 82.96073        | Visceral fat                      | rs3846635  |
| 5          | 82.98574        | Prostate cancer                   | rs4466137  |
| 5          | 83.17359        | Ankylosing spondylitis            | rs4552569  |
| 5          | 83.26094        | Mitochondrial DNA levels          | rs2301070  |



# TBSS\_L1\_Anterior\_corona\_radiata\_L

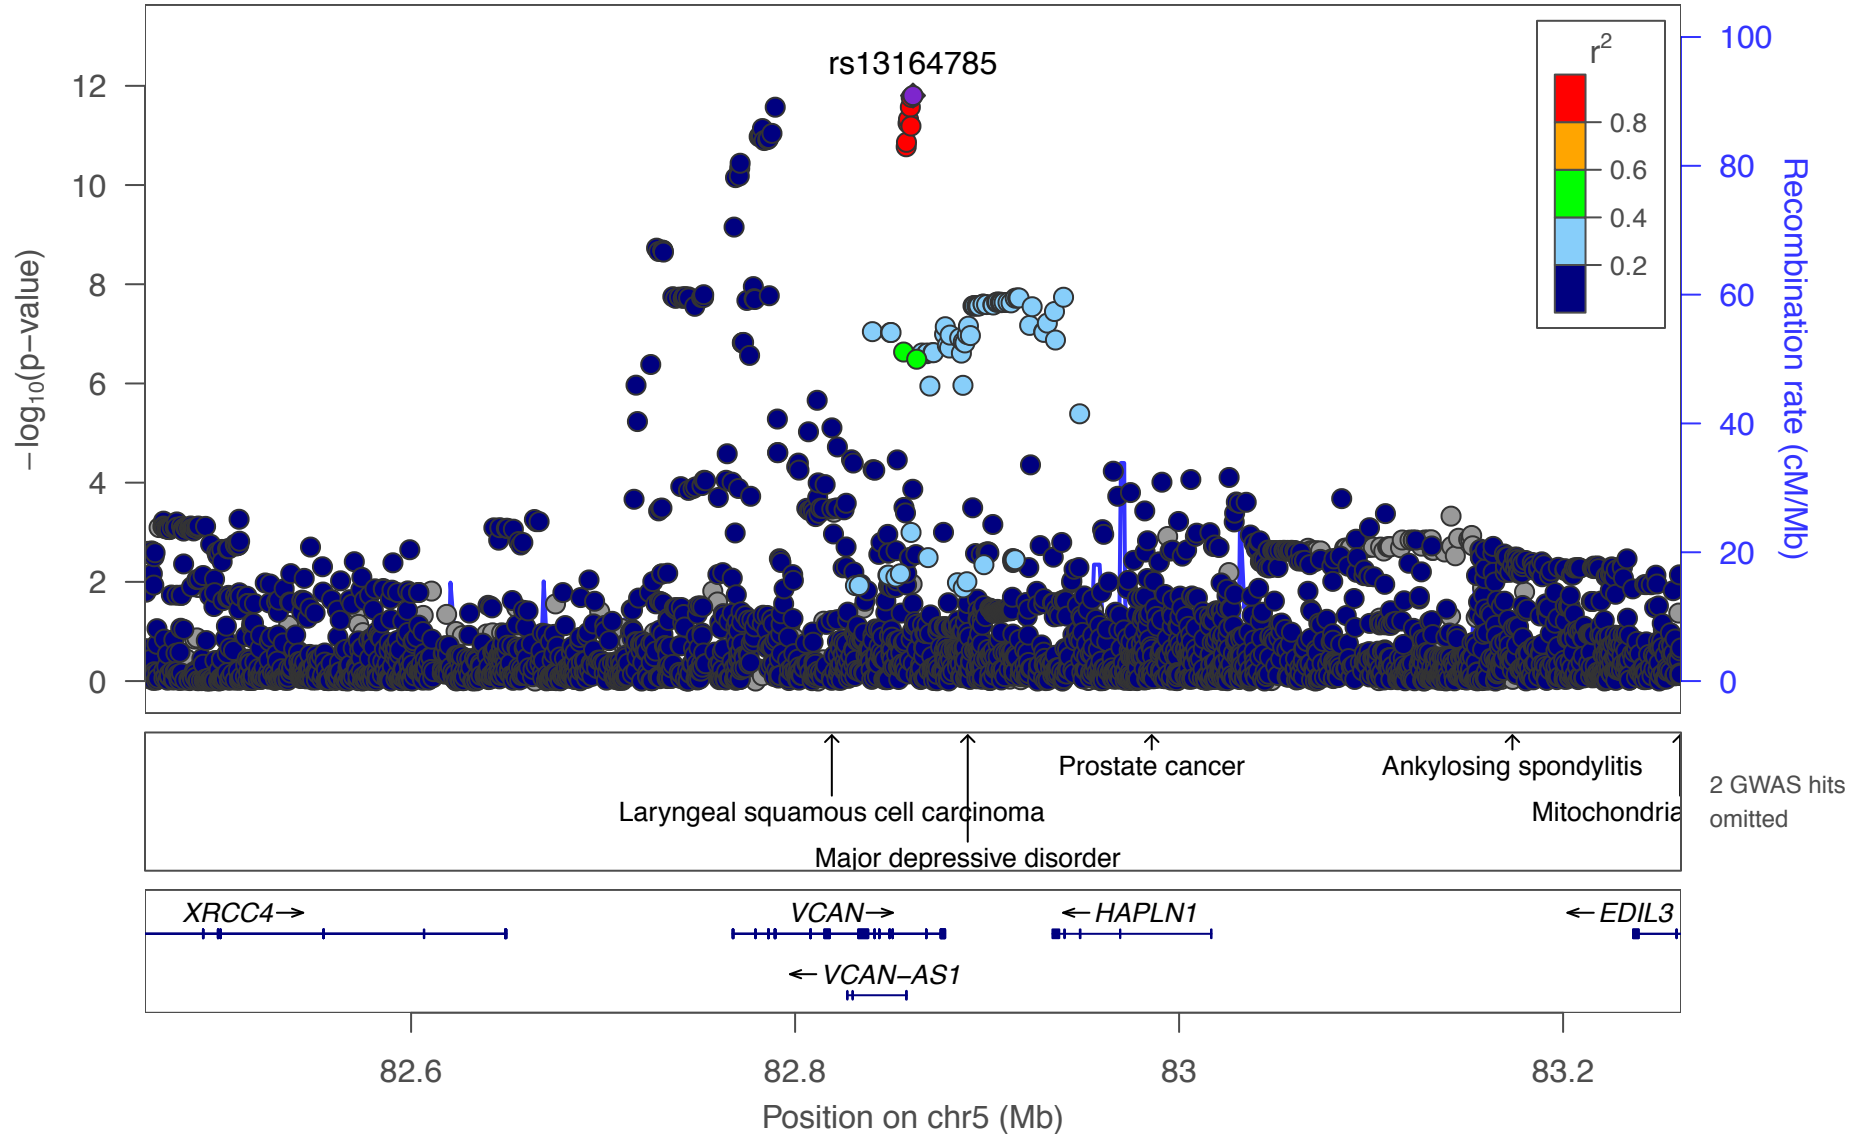

date: Thu Aug 17 17:52:01 2017

build: hg19

display range: chr5:82461400–83261400 [82461400–83261400]

hilite range: 0 – 0 [ 0 – 0 ]

reference SNP: chr5:82861400

number of SNPs plotted: 3396

min P.value: 1.57E–12 [chr5:82861400]

max P.value: 9.99E–1 [chr5:82939273]

omitted GWAS Hits: chr5:83.260938–Mitochondrial DNA levels, NA

## GWAS Catalog SNPs in Region

| <b>chr</b> | <b>pos (Mb)</b> | <b>trait</b>                      | <b>snp</b> |
|------------|-----------------|-----------------------------------|------------|
| 5          | 82.81912        | Laryngeal squamous cell carcinoma | rs310518   |
| 5          | 82.84549        | Diisocyanate-induced asthma       | rs3852186  |
| 5          | 82.88991        | Major depressive disorder         | rs310501   |
| 5          | 82.96073        | Visceral fat                      | rs3846635  |
| 5          | 82.98574        | Prostate cancer                   | rs4466137  |
| 5          | 83.17359        | Ankylosing spondylitis            | rs4552569  |
| 5          | 83.26094        | Mitochondrial DNA levels          | rs2301070  |

# TBSS\_L1\_Sagittal\_stratum\_L

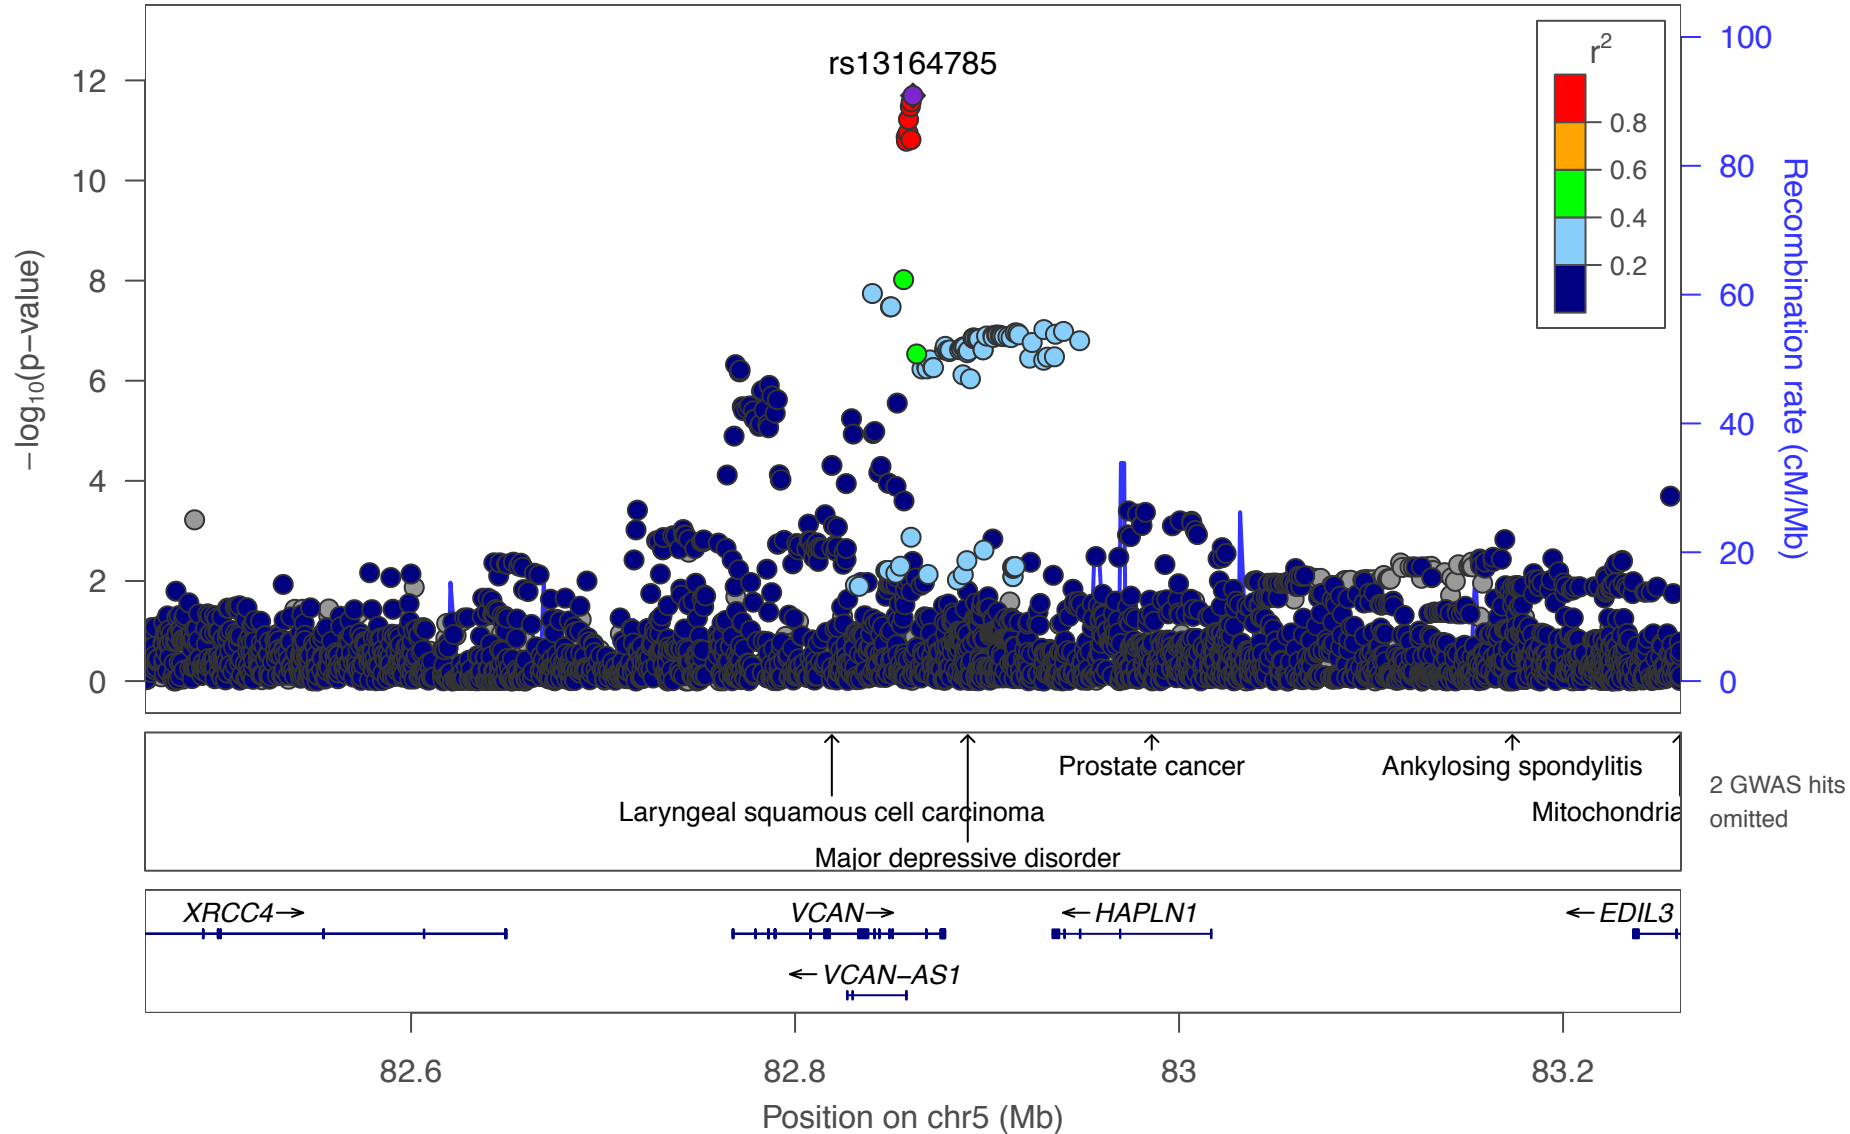

date: Thu Aug 17 17:52:01 2017

build: hg19

display range: chr5:82461400–83261400 [82461400–83261400]

hilite range: 0 – 0 [ 0 – 0 ]

reference SNP: chr5:82861400

number of SNPs plotted: 3396

min P.value: 2.01E–12 [chr5:82861400]

max P.value: 10E–1 [chr5:82659352]

omitted GWAS Hits: chr5:83.260938–Mitochondrial DNA levels, NA

## GWAS Catalog SNPs in Region

| <b>chr</b> | <b>pos (Mb)</b> | <b>trait</b>                      | <b>snp</b> |
|------------|-----------------|-----------------------------------|------------|
| 5          | 82.81912        | Laryngeal squamous cell carcinoma | rs310518   |
| 5          | 82.84549        | Diisocyanate-induced asthma       | rs3852186  |
| 5          | 82.88991        | Major depressive disorder         | rs310501   |
| 5          | 82.96073        | Visceral fat                      | rs3846635  |
| 5          | 82.98574        | Prostate cancer                   | rs4466137  |
| 5          | 83.17359        | Ankylosing spondylitis            | rs4552569  |
| 5          | 83.26094        | Mitochondrial DNA levels          | rs2301070  |

# TBSS\_L2\_Genu\_of\_corpus\_callosum

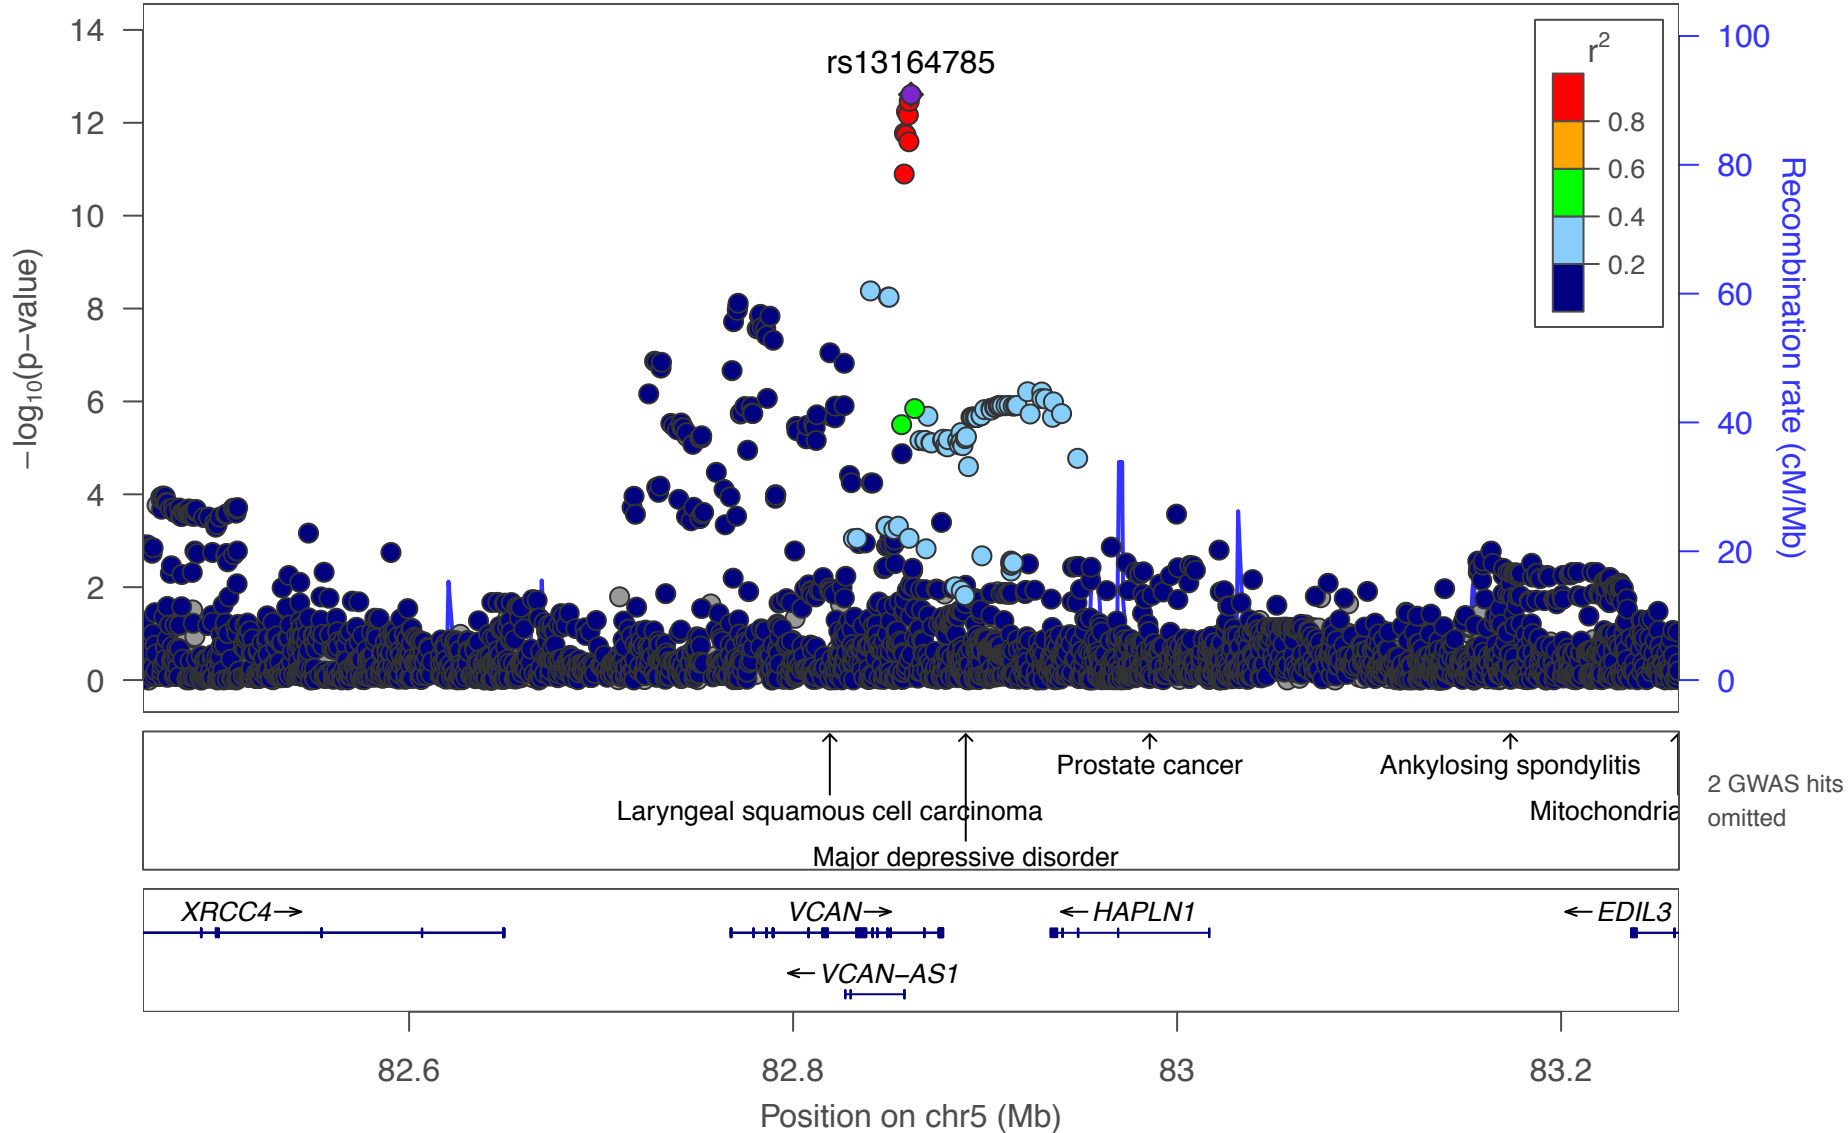

date: Thu Aug 17 17:52:01 2017

build: hg19

display range: chr5:82461400–83261400 [82461400–83261400]

hilite range: 0 – 0 [ 0 – 0 ]

reference SNP: chr5:82861400

number of SNPs plotted: 3396

min P.value: 2.47E–13 [chr5:82861400]

max P.value: 10E–1 [chr5:82642540]

omitted GWAS Hits: chr5:83.260938–Mitochondrial DNA levels, NA



## GWAS Catalog SNPs in Region

| <b>chr</b> | <b>pos (Mb)</b> | <b>trait</b>                      | <b>snp</b> |
|------------|-----------------|-----------------------------------|------------|
| 5          | 82.81912        | Laryngeal squamous cell carcinoma | rs310518   |
| 5          | 82.84549        | Diisocyanate-induced asthma       | rs3852186  |
| 5          | 82.88991        | Major depressive disorder         | rs310501   |
| 5          | 82.96073        | Visceral fat                      | rs3846635  |
| 5          | 82.98574        | Prostate cancer                   | rs4466137  |
| 5          | 83.17359        | Ankylosing spondylitis            | rs4552569  |
| 5          | 83.26094        | Mitochondrial DNA levels          | rs2301070  |

# TBSS\_L2\_Anterior\_corona\_radiata\_R

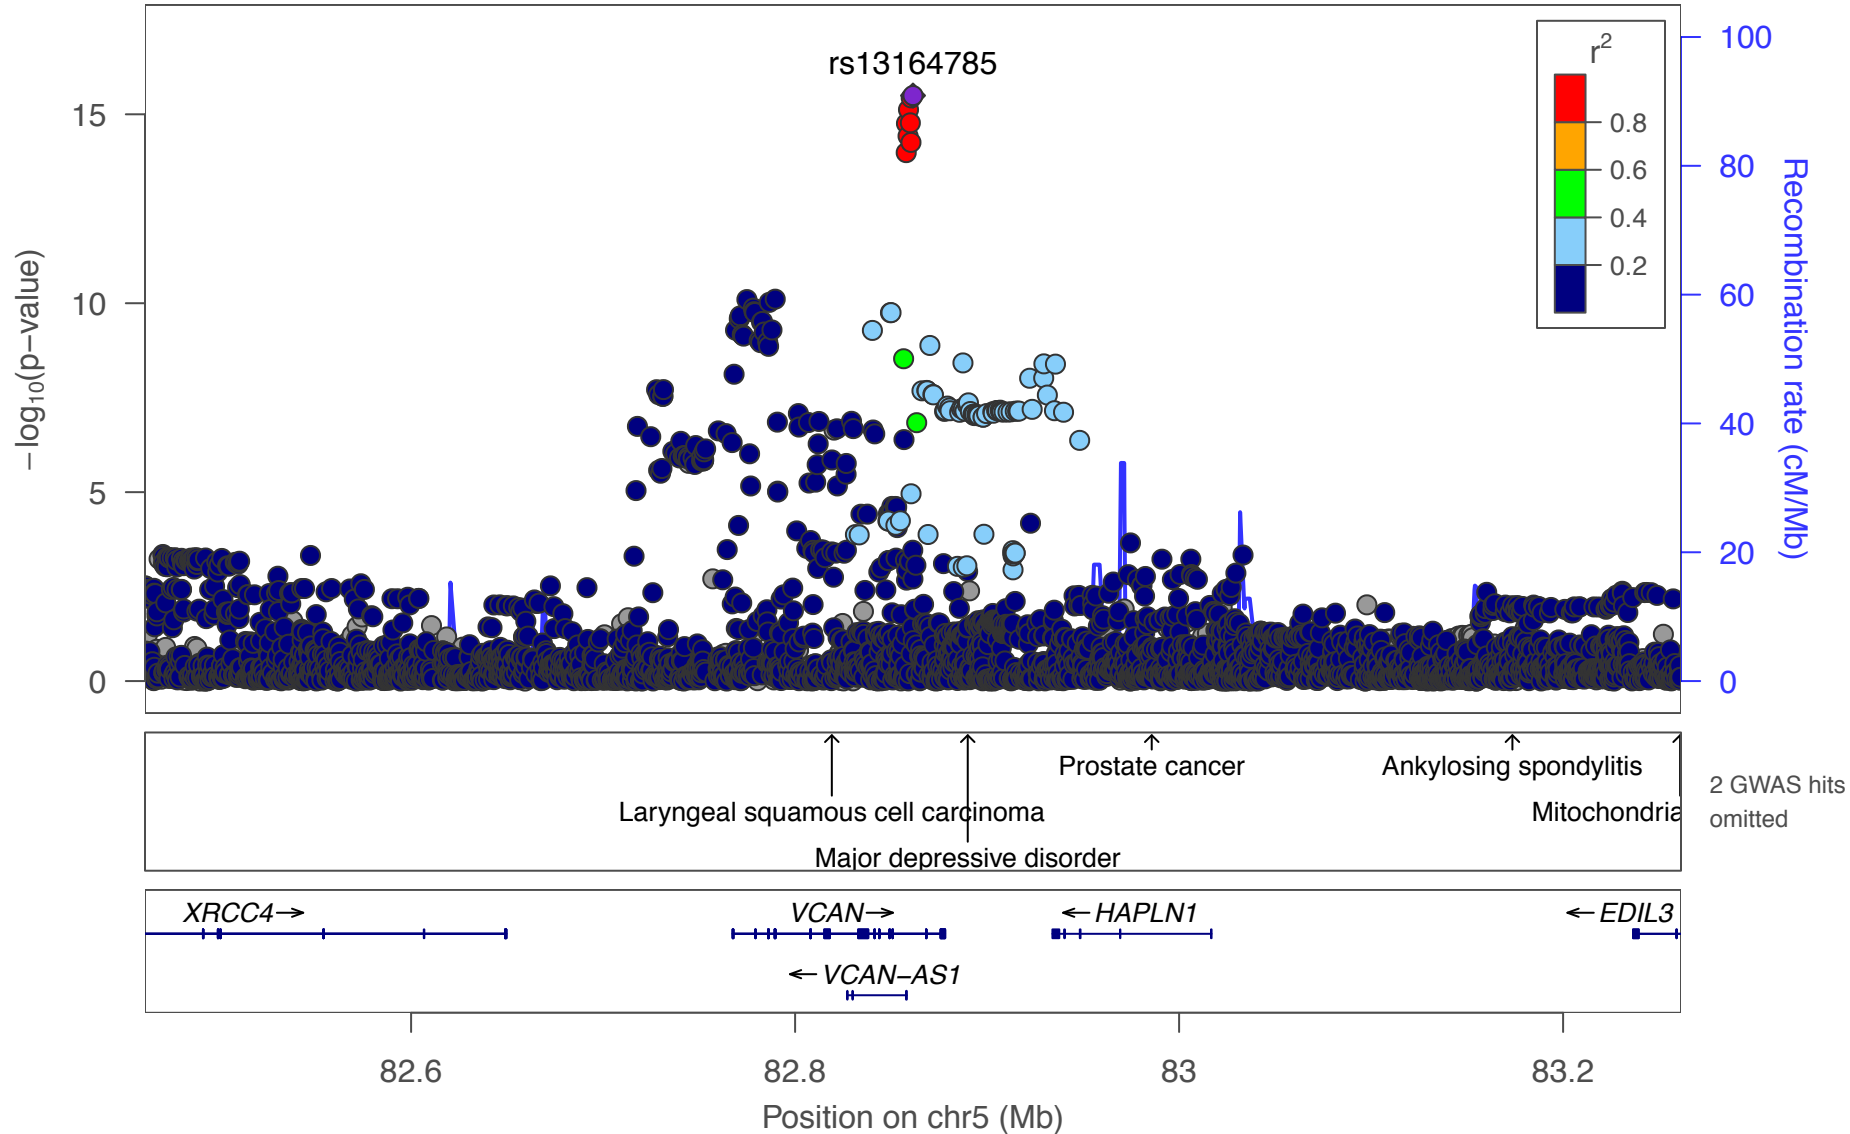

date: Thu Aug 17 17:52:01 2017

build: hg19

display range: chr5:82461400–83261400 [82461400–83261400]

hilite range: 0 – 0 [ 0 – 0 ]

reference SNP: chr5:82861400

number of SNPs plotted: 3396

min P.value: 3.19E–16 [chr5:82861400]

max P.value: 10E–1 [chr5:82492578]

omitted GWAS Hits: chr5:83.260938–Mitochondrial DNA levels, NA

## GWAS Catalog SNPs in Region

| <b>chr</b> | <b>pos (Mb)</b> | <b>trait</b>                      | <b>snp</b> |
|------------|-----------------|-----------------------------------|------------|
| 5          | 82.81912        | Laryngeal squamous cell carcinoma | rs310518   |
| 5          | 82.84549        | Diisocyanate-induced asthma       | rs3852186  |
| 5          | 82.88991        | Major depressive disorder         | rs310501   |
| 5          | 82.96073        | Visceral fat                      | rs3846635  |
| 5          | 82.98574        | Prostate cancer                   | rs4466137  |
| 5          | 83.17359        | Ankylosing spondylitis            | rs4552569  |
| 5          | 83.26094        | Mitochondrial DNA levels          | rs2301070  |

# TBSS\_L2\_Anterior\_corona\_radiata\_L

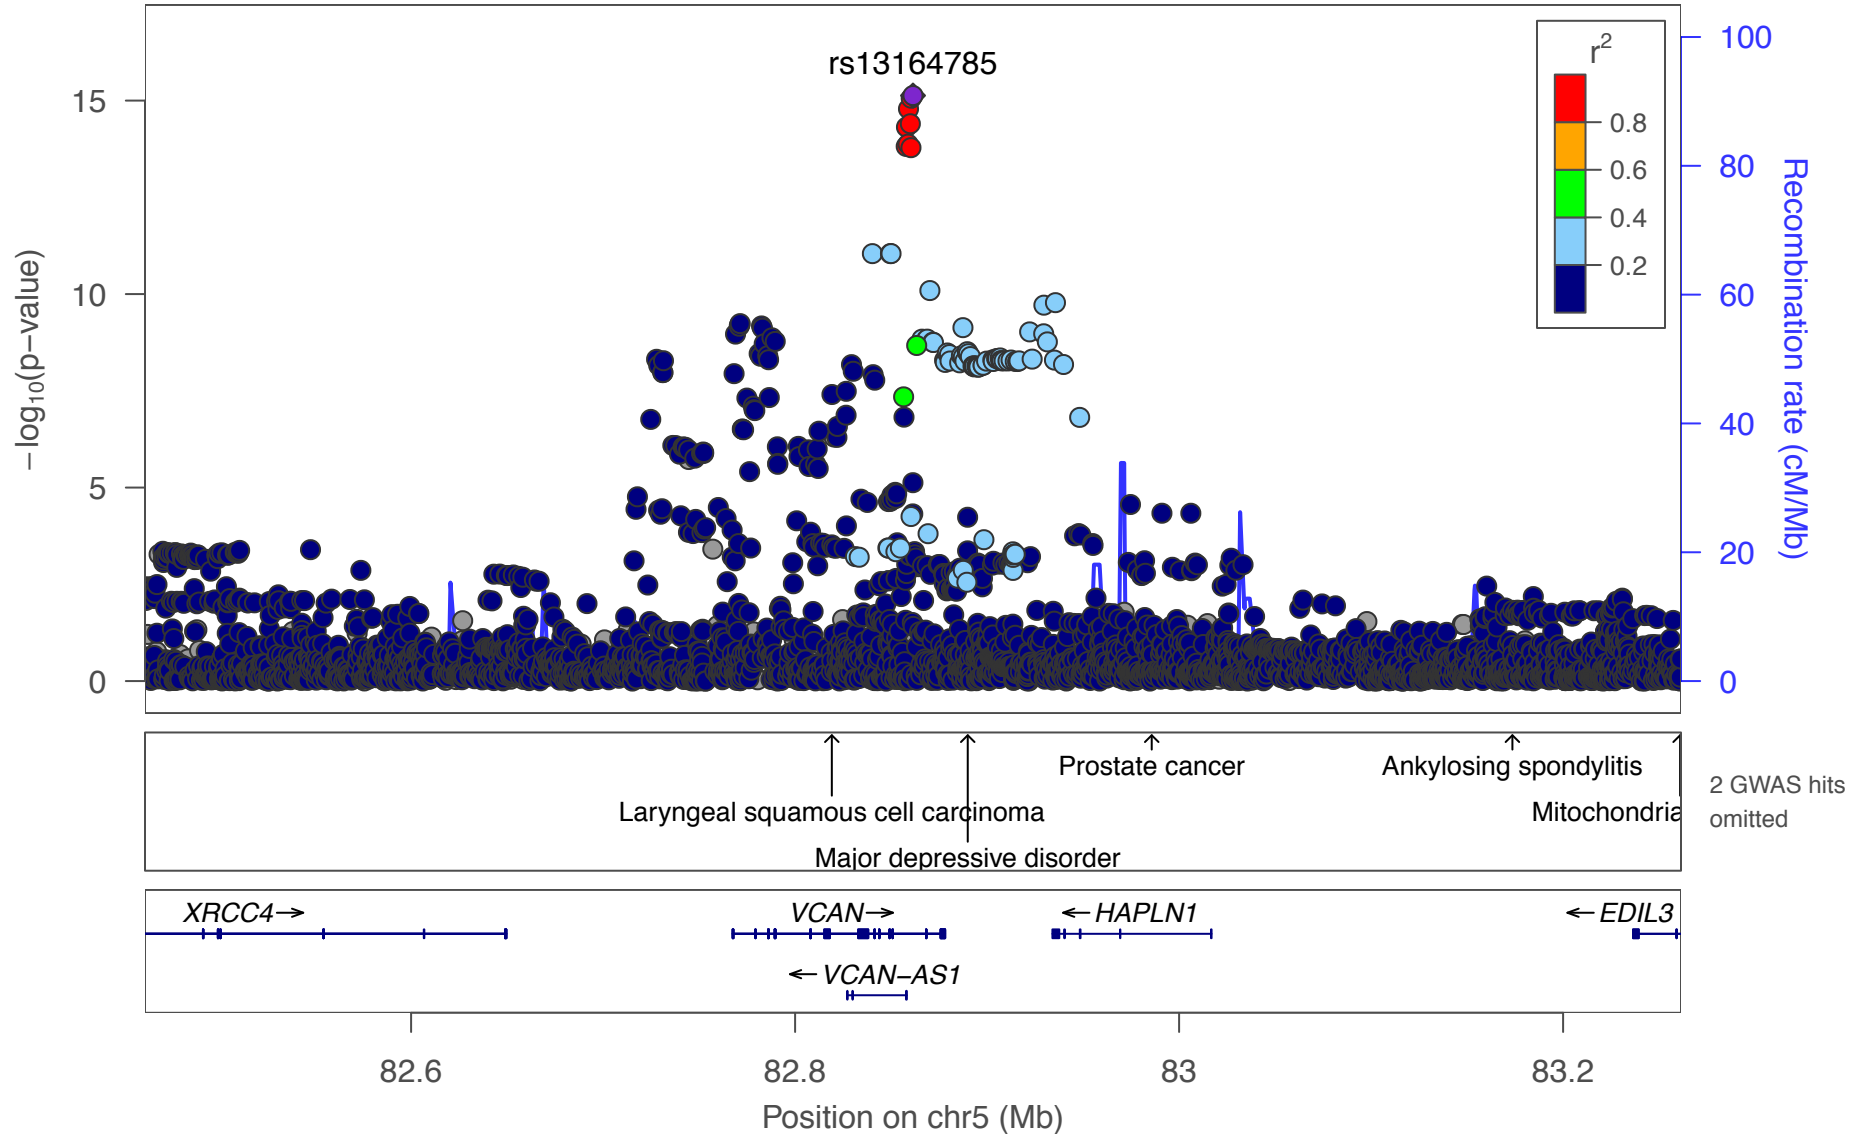

date: Thu Aug 17 17:52:01 2017

build: hg19

display range: chr5:82461400–83261400 [82461400–83261400]

hilite range: 0 – 0 [ 0 – 0 ]

reference SNP: chr5:82861400

number of SNPs plotted: 3396

min P.value: 7.41E–16 [chr5:82861400]

max P.value: 10E–1 [chr5:82847384]

omitted GWAS Hits: chr5:83.260938–Mitochondrial DNA levels, NA

## GWAS Catalog SNPs in Region

| <b>chr</b> | <b>pos (Mb)</b> | <b>trait</b>                      | <b>snp</b> |
|------------|-----------------|-----------------------------------|------------|
| 5          | 82.81912        | Laryngeal squamous cell carcinoma | rs310518   |
| 5          | 82.84549        | Diisocyanate-induced asthma       | rs3852186  |
| 5          | 82.88991        | Major depressive disorder         | rs310501   |
| 5          | 82.96073        | Visceral fat                      | rs3846635  |
| 5          | 82.98574        | Prostate cancer                   | rs4466137  |
| 5          | 83.17359        | Ankylosing spondylitis            | rs4552569  |
| 5          | 83.26094        | Mitochondrial DNA levels          | rs2301070  |

# TBSS\_L2\_Cingulum\_cingulate\_gyrus\_R

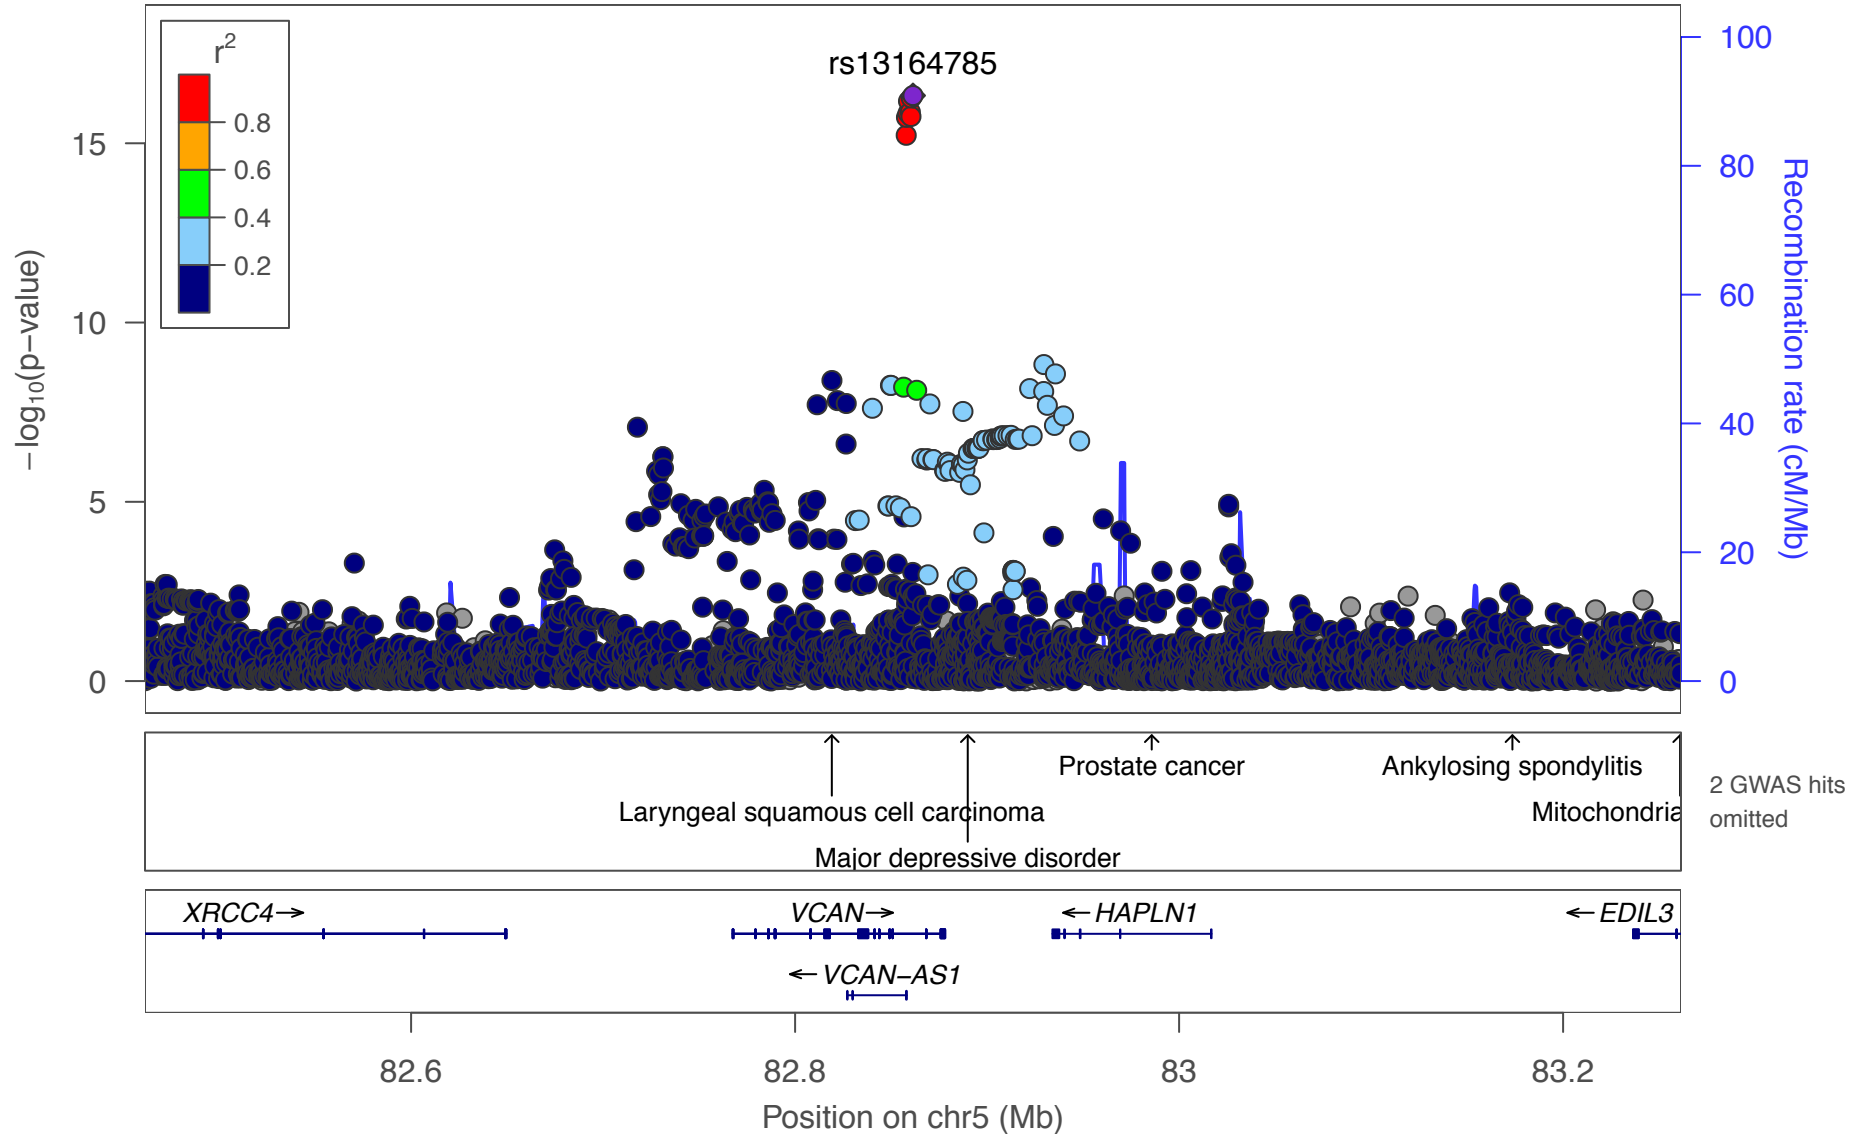



date: Thu Aug 17 17:52:01 2017

build: hg19

display range: chr5:82461400–83261400 [82461400–83261400]

hilite range: 0 – 0 [ 0 – 0 ]

reference SNP: chr5:82861400

number of SNPs plotted: 3396

min P.value: 4.67E–17 [chr5:82861400]

max P.value: 9.99E–1 [chr5:83217296]

omitted GWAS Hits: chr5:83.260938–Mitochondrial DNA levels, NA

## GWAS Catalog SNPs in Region

| <b>chr</b> | <b>pos (Mb)</b> | <b>trait</b>                      | <b>snp</b> |
|------------|-----------------|-----------------------------------|------------|
| 5          | 82.81912        | Laryngeal squamous cell carcinoma | rs310518   |
| 5          | 82.84549        | Diisocyanate-induced asthma       | rs3852186  |
| 5          | 82.88991        | Major depressive disorder         | rs310501   |
| 5          | 82.96073        | Visceral fat                      | rs3846635  |
| 5          | 82.98574        | Prostate cancer                   | rs4466137  |
| 5          | 83.17359        | Ankylosing spondylitis            | rs4552569  |
| 5          | 83.26094        | Mitochondrial DNA levels          | rs2301070  |

# TBSS\_L2\_Cingulum\_hippocampus\_L

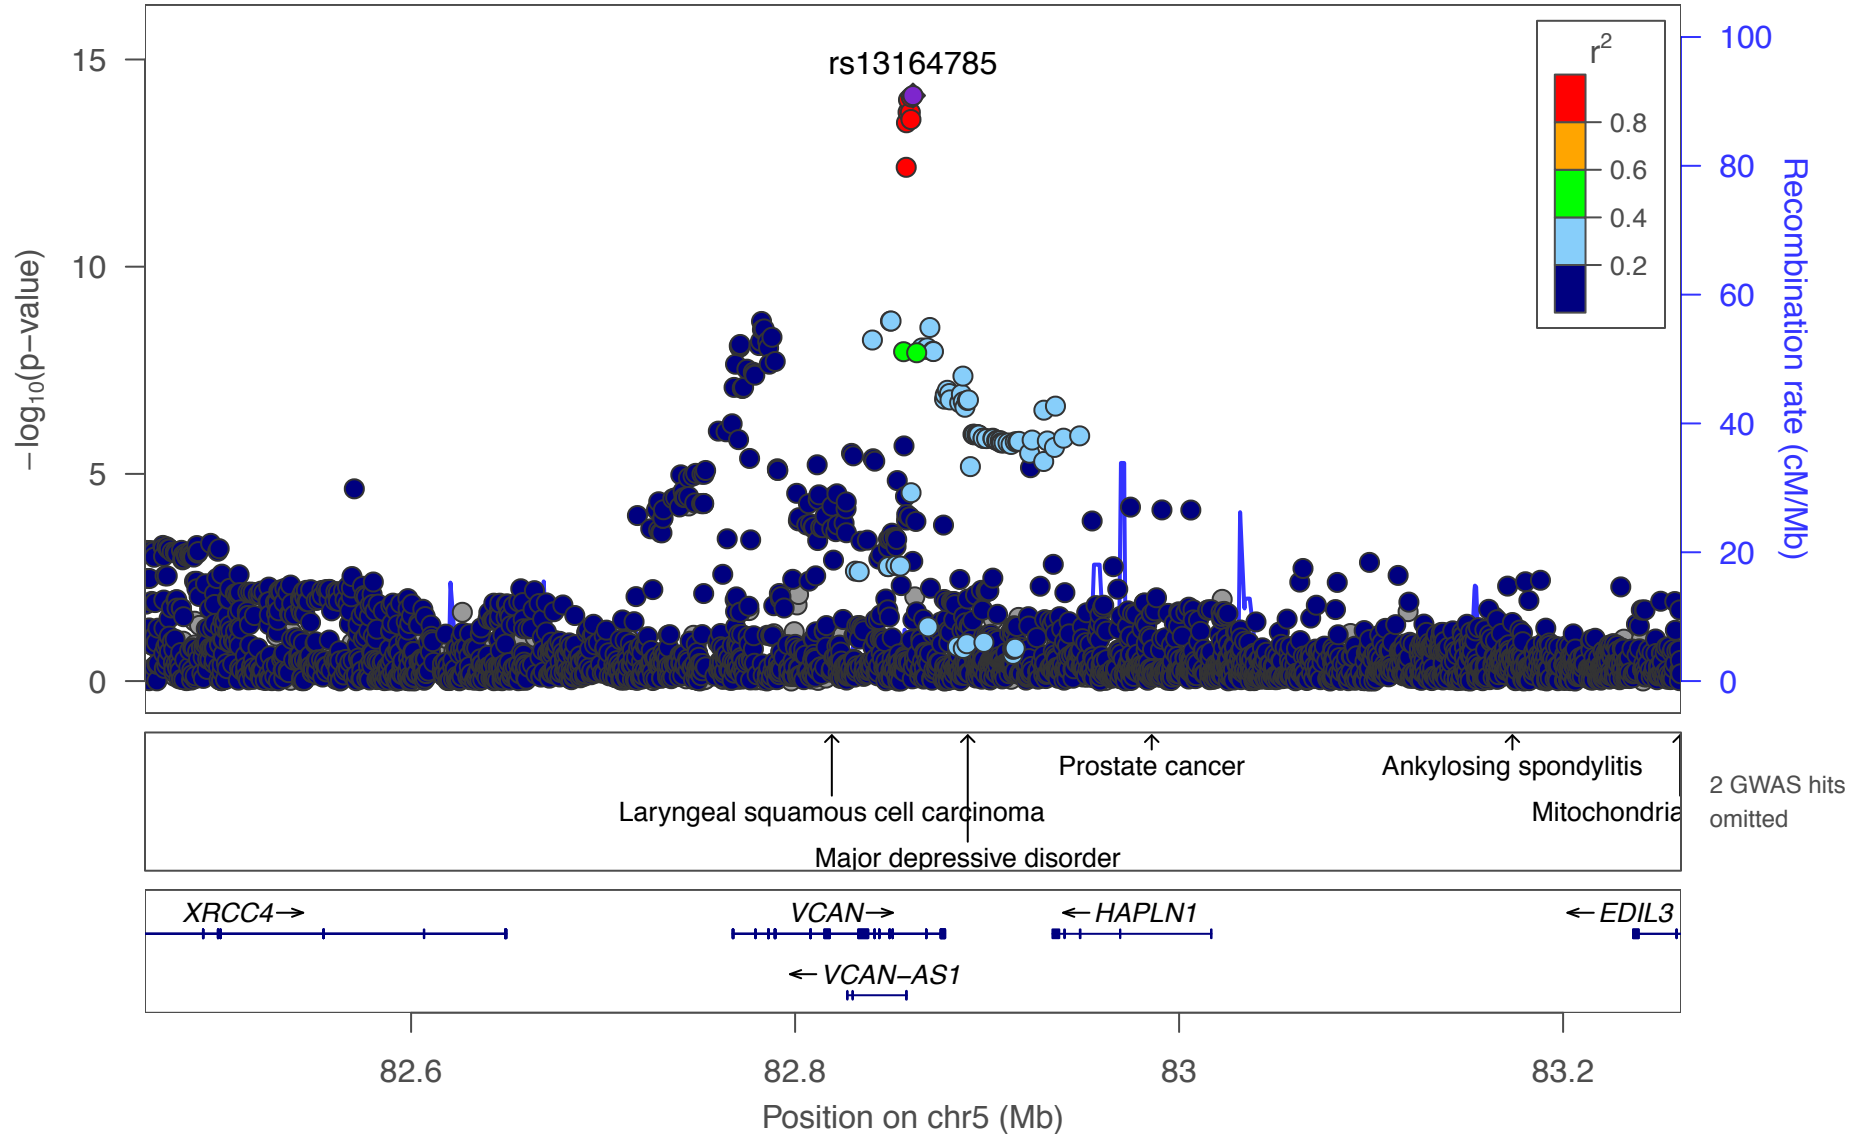

date: Thu Aug 17 17:52:01 2017

build: hg19

display range: chr5:82461400–83261400 [82461400–83261400]

hilite range: 0 – 0 [ 0 – 0 ]

reference SNP: chr5:82861400

number of SNPs plotted: 3396

min P.value: 7.41E–15 [chr5:82861400]

max P.value: 10E–1 [chr5:83099074]

omitted GWAS Hits: chr5:83.260938–Mitochondrial DNA levels, NA

## GWAS Catalog SNPs in Region

| <b>chr</b> | <b>pos (Mb)</b> | <b>trait</b>                      | <b>snp</b> |
|------------|-----------------|-----------------------------------|------------|
| 5          | 82.81912        | Laryngeal squamous cell carcinoma | rs310518   |
| 5          | 82.84549        | Diisocyanate-induced asthma       | rs3852186  |
| 5          | 82.88991        | Major depressive disorder         | rs310501   |
| 5          | 82.96073        | Visceral fat                      | rs3846635  |
| 5          | 82.98574        | Prostate cancer                   | rs4466137  |
| 5          | 83.17359        | Ankylosing spondylitis            | rs4552569  |
| 5          | 83.26094        | Mitochondrial DNA levels          | rs2301070  |

# TBSS\_L3\_Genu\_of\_corpus\_callosum

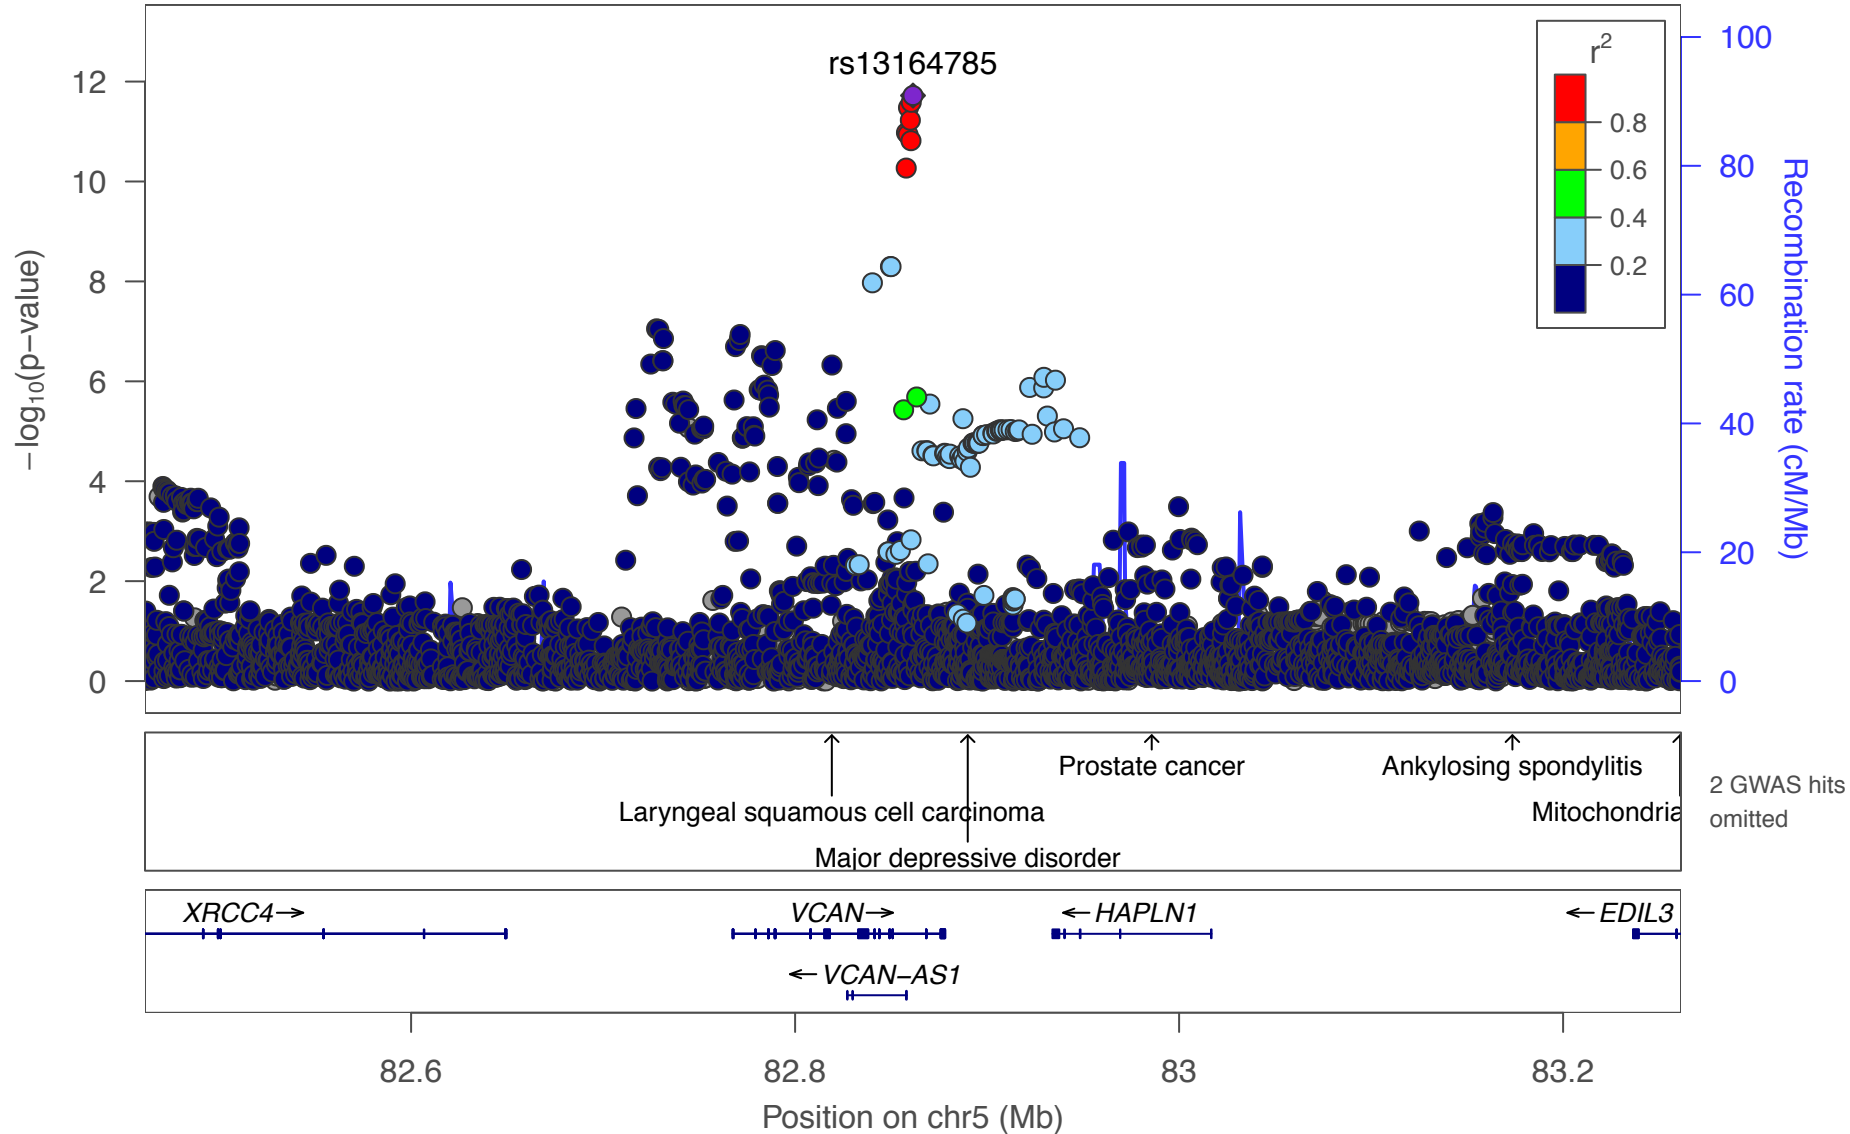

date: Thu Aug 17 17:52:01 2017

build: hg19

display range: chr5:82461400–83261400 [82461400–83261400]

hilite range: 0 – 0 [ 0 – 0 ]

reference SNP: chr5:82861400

number of SNPs plotted: 3396

min P.value: 1.91E–12 [chr5:82861400]

max P.value: 9.99E–1 [chr5:82588995]

omitted GWAS Hits: chr5:83.260938–Mitochondrial DNA levels, NA

## GWAS Catalog SNPs in Region

| <b>chr</b> | <b>pos (Mb)</b> | <b>trait</b>                      | <b>snp</b> |
|------------|-----------------|-----------------------------------|------------|
| 5          | 82.81912        | Laryngeal squamous cell carcinoma | rs310518   |
| 5          | 82.84549        | Diisocyanate-induced asthma       | rs3852186  |
| 5          | 82.88991        | Major depressive disorder         | rs310501   |
| 5          | 82.96073        | Visceral fat                      | rs3846635  |
| 5          | 82.98574        | Prostate cancer                   | rs4466137  |
| 5          | 83.17359        | Ankylosing spondylitis            | rs4552569  |
| 5          | 83.26094        | Mitochondrial DNA levels          | rs2301070  |



# TBSS\_L3\_Inferior\_cerebellar\_peduncle\_R

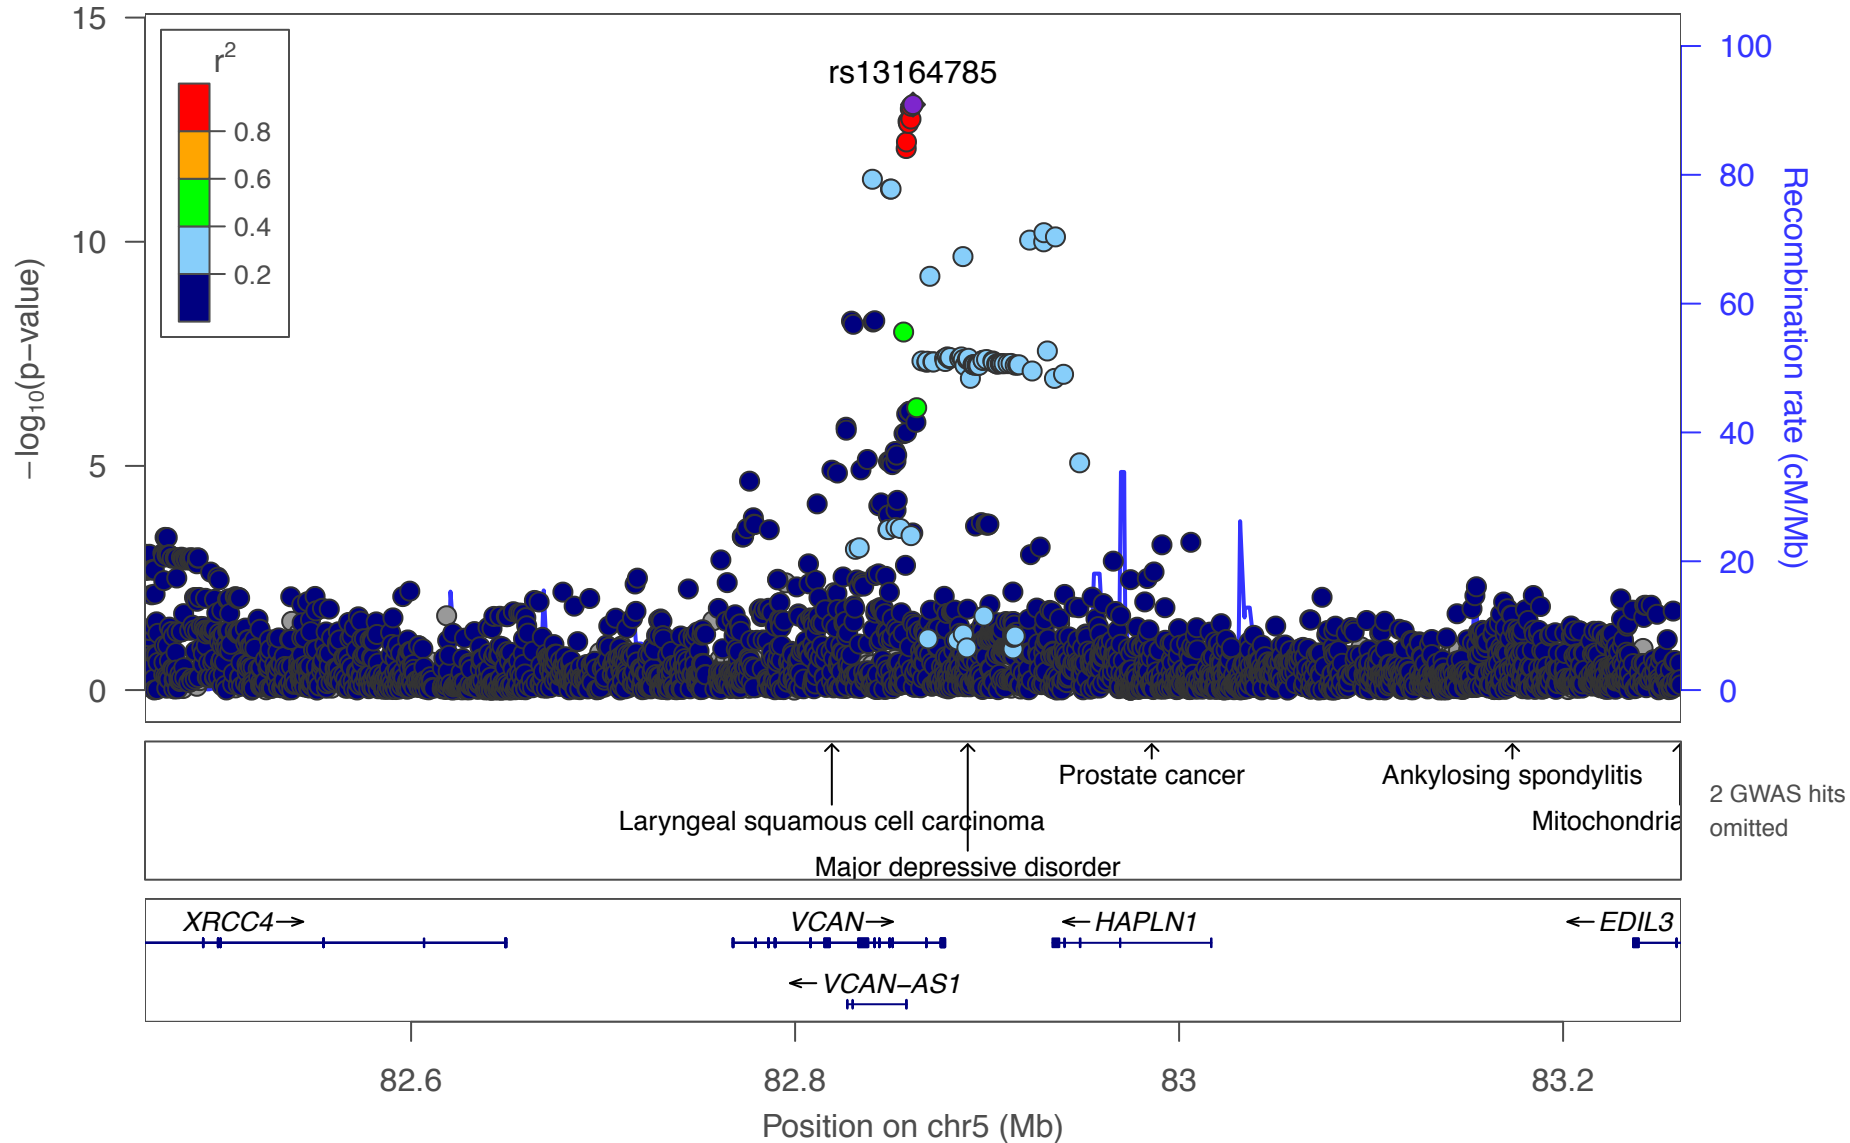

date: Thu Aug 17 17:52:01 2017

build: hg19

display range: chr5:82461400–83261400 [82461400–83261400]

hilite range: 0 – 0 [ 0 – 0 ]

reference SNP: chr5:82861400

number of SNPs plotted: 3396

min P.value: 8.71E–14 [chr5:82861400]

max P.value: 10E–1 [chr5:82516916]

omitted GWAS Hits: chr5:83.260938–Mitochondrial DNA levels, NA

## GWAS Catalog SNPs in Region

| <b>chr</b> | <b>pos (Mb)</b> | <b>trait</b>                      | <b>snp</b> |
|------------|-----------------|-----------------------------------|------------|
| 5          | 82.81912        | Laryngeal squamous cell carcinoma | rs310518   |
| 5          | 82.84549        | Diisocyanate-induced asthma       | rs3852186  |
| 5          | 82.88991        | Major depressive disorder         | rs310501   |
| 5          | 82.96073        | Visceral fat                      | rs3846635  |
| 5          | 82.98574        | Prostate cancer                   | rs4466137  |
| 5          | 83.17359        | Ankylosing spondylitis            | rs4552569  |
| 5          | 83.26094        | Mitochondrial DNA levels          | rs2301070  |

# TBSS\_L3\_Inferior\_cerebellar\_peduncle\_L

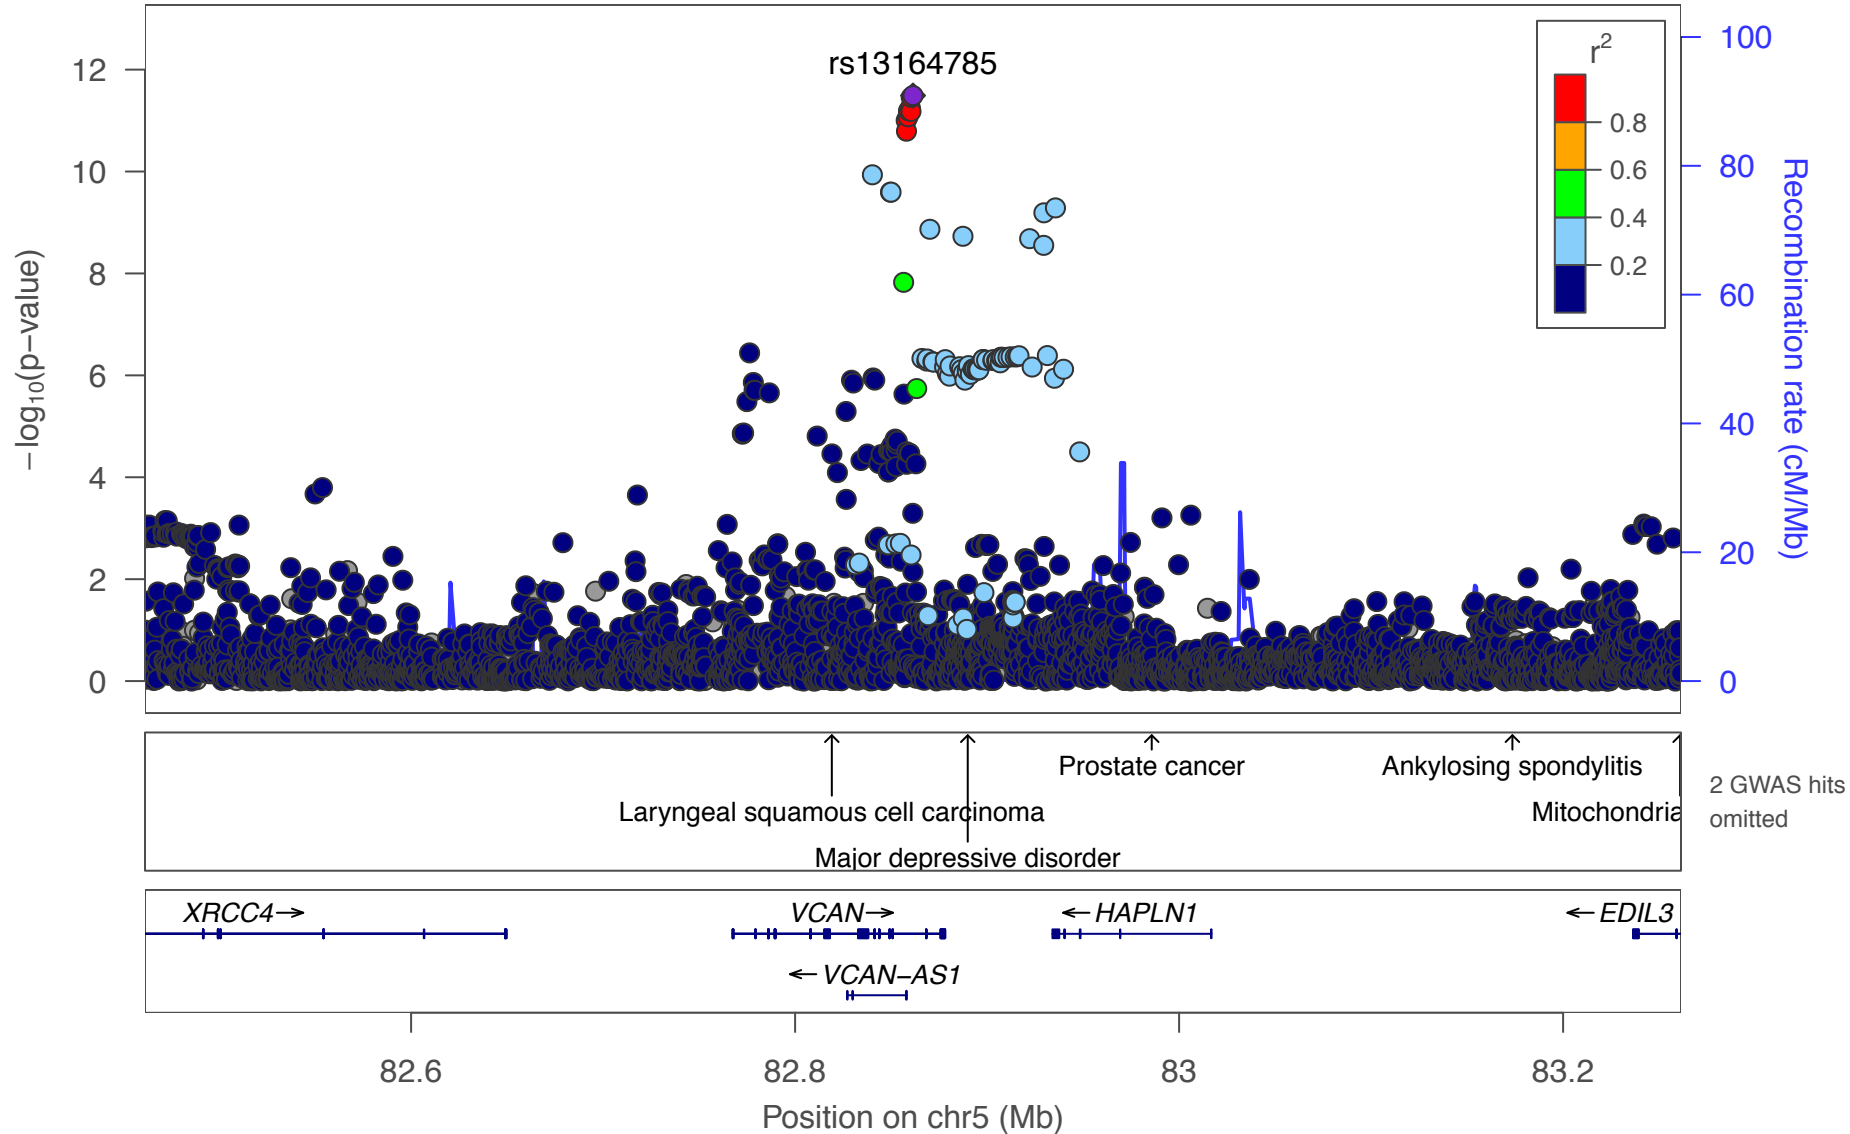

date: Thu Aug 17 17:52:01 2017

build: hg19

display range: chr5:82461400–83261400 [82461400–83261400]

hilite range: 0 – 0 [ 0 – 0 ]

reference SNP: chr5:82861400

number of SNPs plotted: 3396

min P.value: 3.23E–12 [chr5:82861400]

max P.value: 10E–1 [chr5:83215237]

omitted GWAS Hits: chr5:83.260938–Mitochondrial DNA levels, NA

## GWAS Catalog SNPs in Region

| <b>chr</b> | <b>pos (Mb)</b> | <b>trait</b>                      | <b>snp</b> |
|------------|-----------------|-----------------------------------|------------|
| 5          | 82.81912        | Laryngeal squamous cell carcinoma | rs310518   |
| 5          | 82.84549        | Diisocyanate-induced asthma       | rs3852186  |
| 5          | 82.88991        | Major depressive disorder         | rs310501   |
| 5          | 82.96073        | Visceral fat                      | rs3846635  |
| 5          | 82.98574        | Prostate cancer                   | rs4466137  |
| 5          | 83.17359        | Ankylosing spondylitis            | rs4552569  |
| 5          | 83.26094        | Mitochondrial DNA levels          | rs2301070  |

# TBSS\_L3\_Anterior\_corona\_radiata\_R

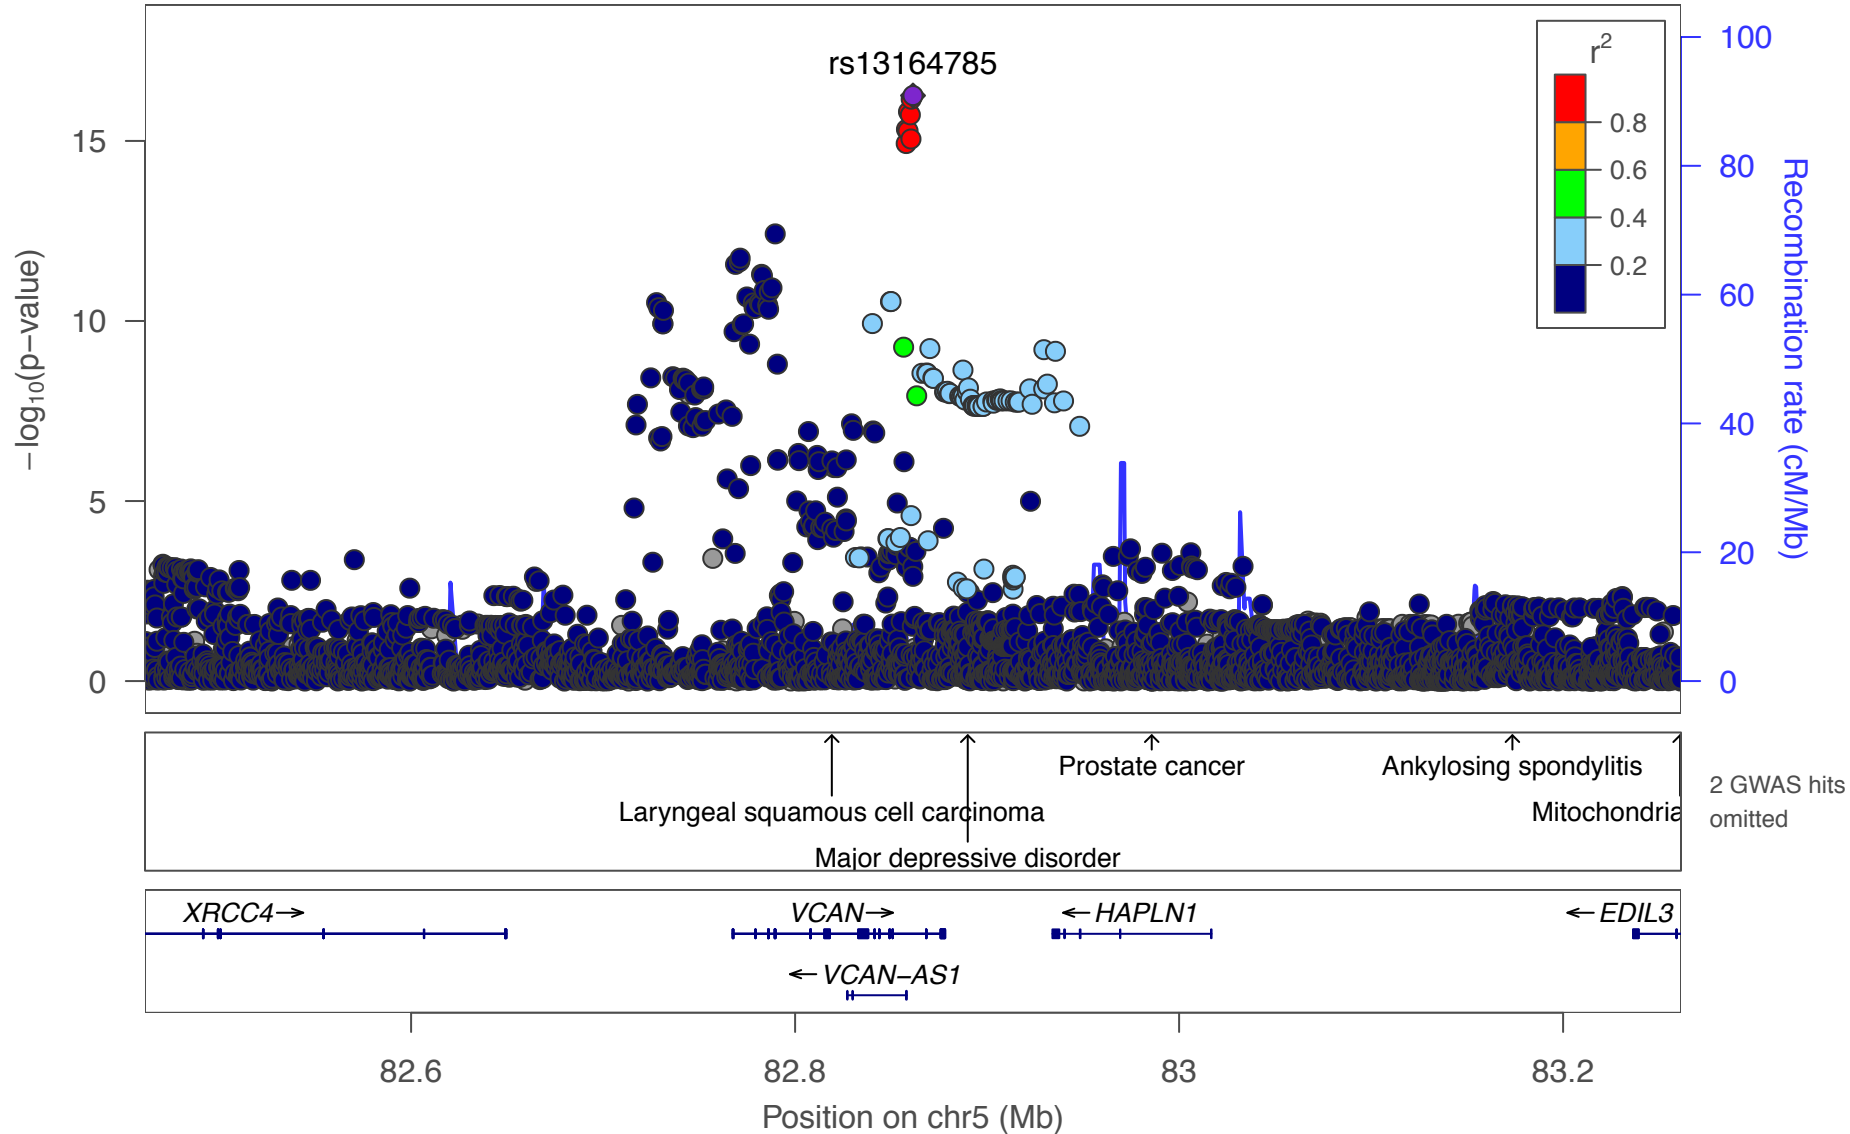

date: Thu Aug 17 17:52:01 2017

build: hg19

display range: chr5:82461400–83261400 [82461400–83261400]

hilite range: 0 – 0 [ 0 – 0 ]

reference SNP: chr5:82861400

number of SNPs plotted: 3396

min P.value: 5.5E–17 [chr5:82861400]

max P.value: 10E–1 [chr5:82723169]

omitted GWAS Hits: chr5:83.260938–Mitochondrial DNA levels, NA



## GWAS Catalog SNPs in Region

| <b>chr</b> | <b>pos (Mb)</b> | <b>trait</b>                      | <b>snp</b> |
|------------|-----------------|-----------------------------------|------------|
| 5          | 82.81912        | Laryngeal squamous cell carcinoma | rs310518   |
| 5          | 82.84549        | Diisocyanate-induced asthma       | rs3852186  |
| 5          | 82.88991        | Major depressive disorder         | rs310501   |
| 5          | 82.96073        | Visceral fat                      | rs3846635  |
| 5          | 82.98574        | Prostate cancer                   | rs4466137  |
| 5          | 83.17359        | Ankylosing spondylitis            | rs4552569  |
| 5          | 83.26094        | Mitochondrial DNA levels          | rs2301070  |

# TBSS\_L3\_Anterior\_corona\_radiata\_L

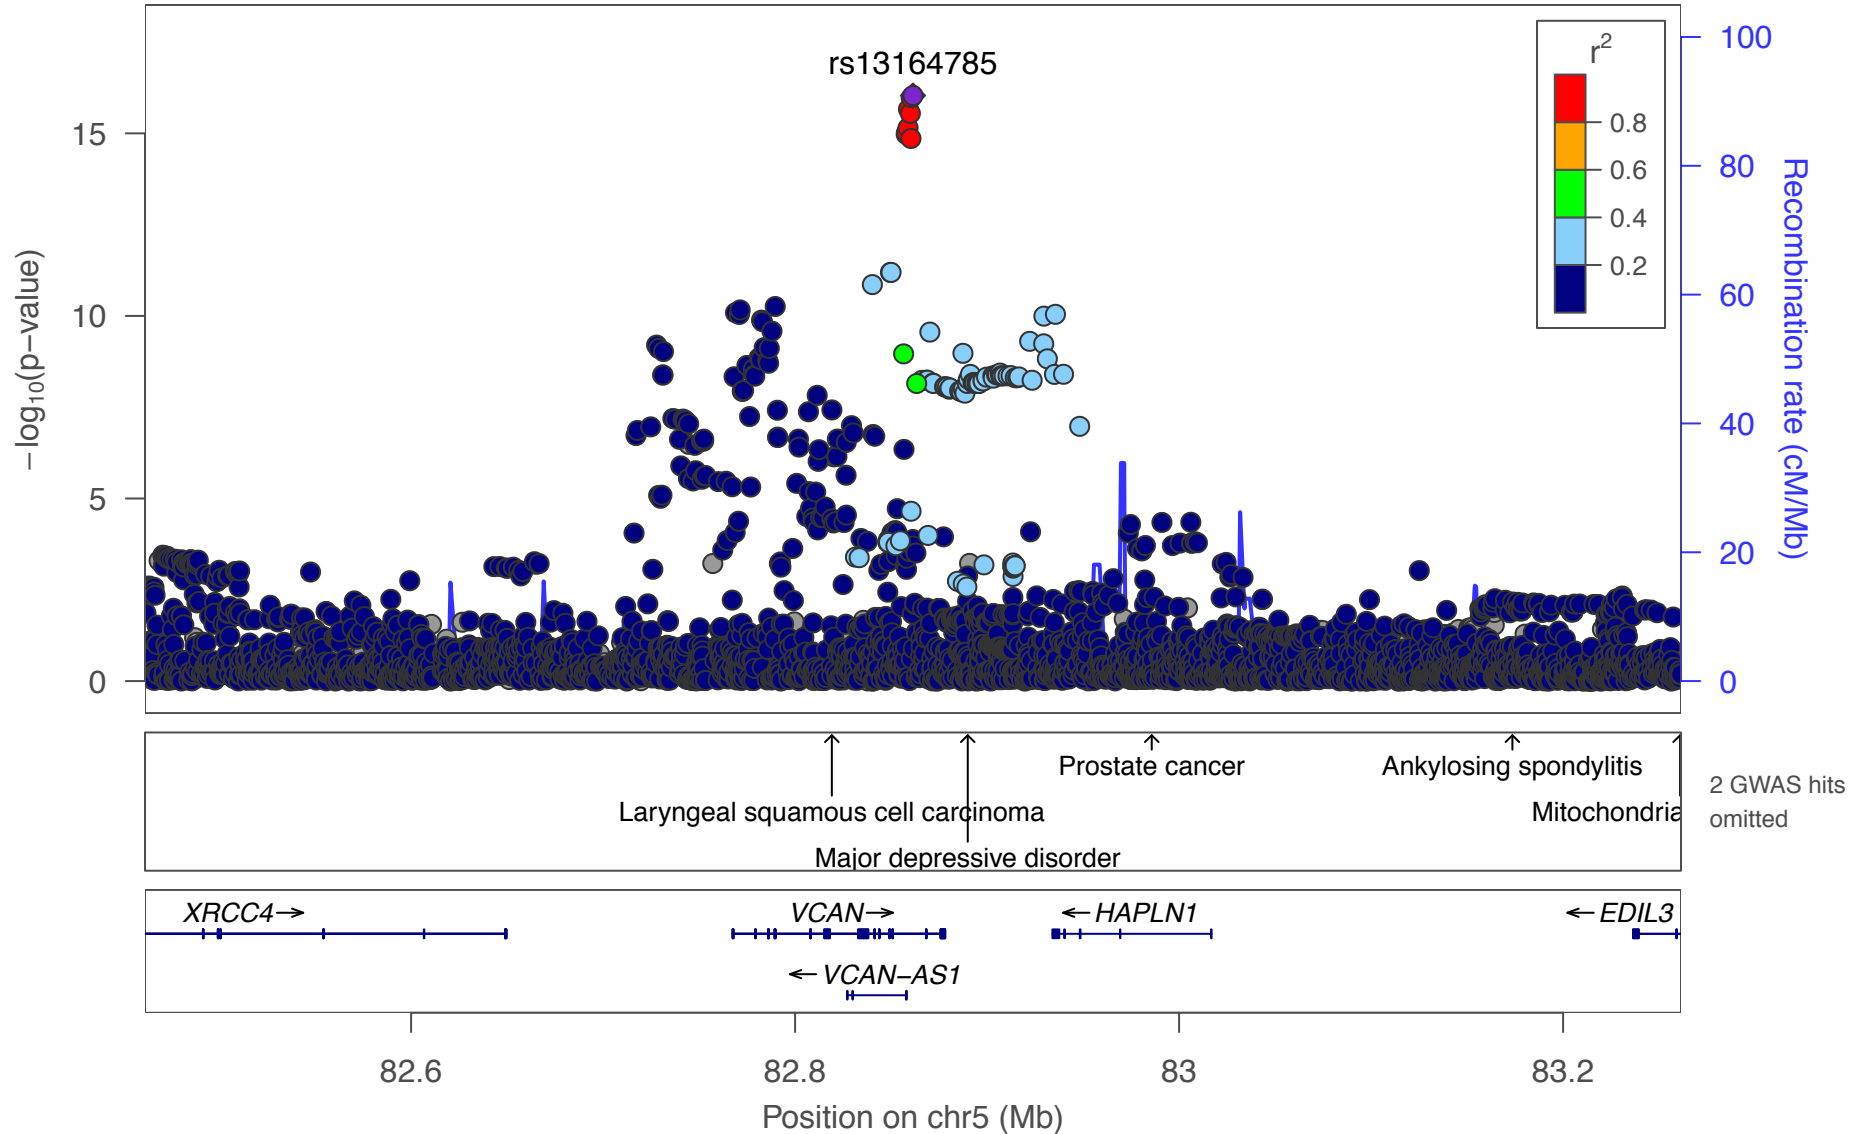

date: Thu Aug 17 17:52:01 2017

build: hg19

display range: chr5:82461400–83261400 [82461400–83261400]

hilite range: 0 – 0 [ 0 – 0 ]

reference SNP: chr5:82861400

number of SNPs plotted: 3396

min P.value: 9.23E–17 [chr5:82861400]

max P.value: 10E–1 [chr5:83097554]

omitted GWAS Hits: chr5:83.260938–Mitochondrial DNA levels, NA

## GWAS Catalog SNPs in Region

| <b>chr</b> | <b>pos (Mb)</b> | <b>trait</b>                      | <b>snp</b> |
|------------|-----------------|-----------------------------------|------------|
| 5          | 82.81912        | Laryngeal squamous cell carcinoma | rs310518   |
| 5          | 82.84549        | Diisocyanate-induced asthma       | rs3852186  |
| 5          | 82.88991        | Major depressive disorder         | rs310501   |
| 5          | 82.96073        | Visceral fat                      | rs3846635  |
| 5          | 82.98574        | Prostate cancer                   | rs4466137  |
| 5          | 83.17359        | Ankylosing spondylitis            | rs4552569  |
| 5          | 83.26094        | Mitochondrial DNA levels          | rs2301070  |

# TBSS\_L3\_Superior\_corona\_radiata\_L

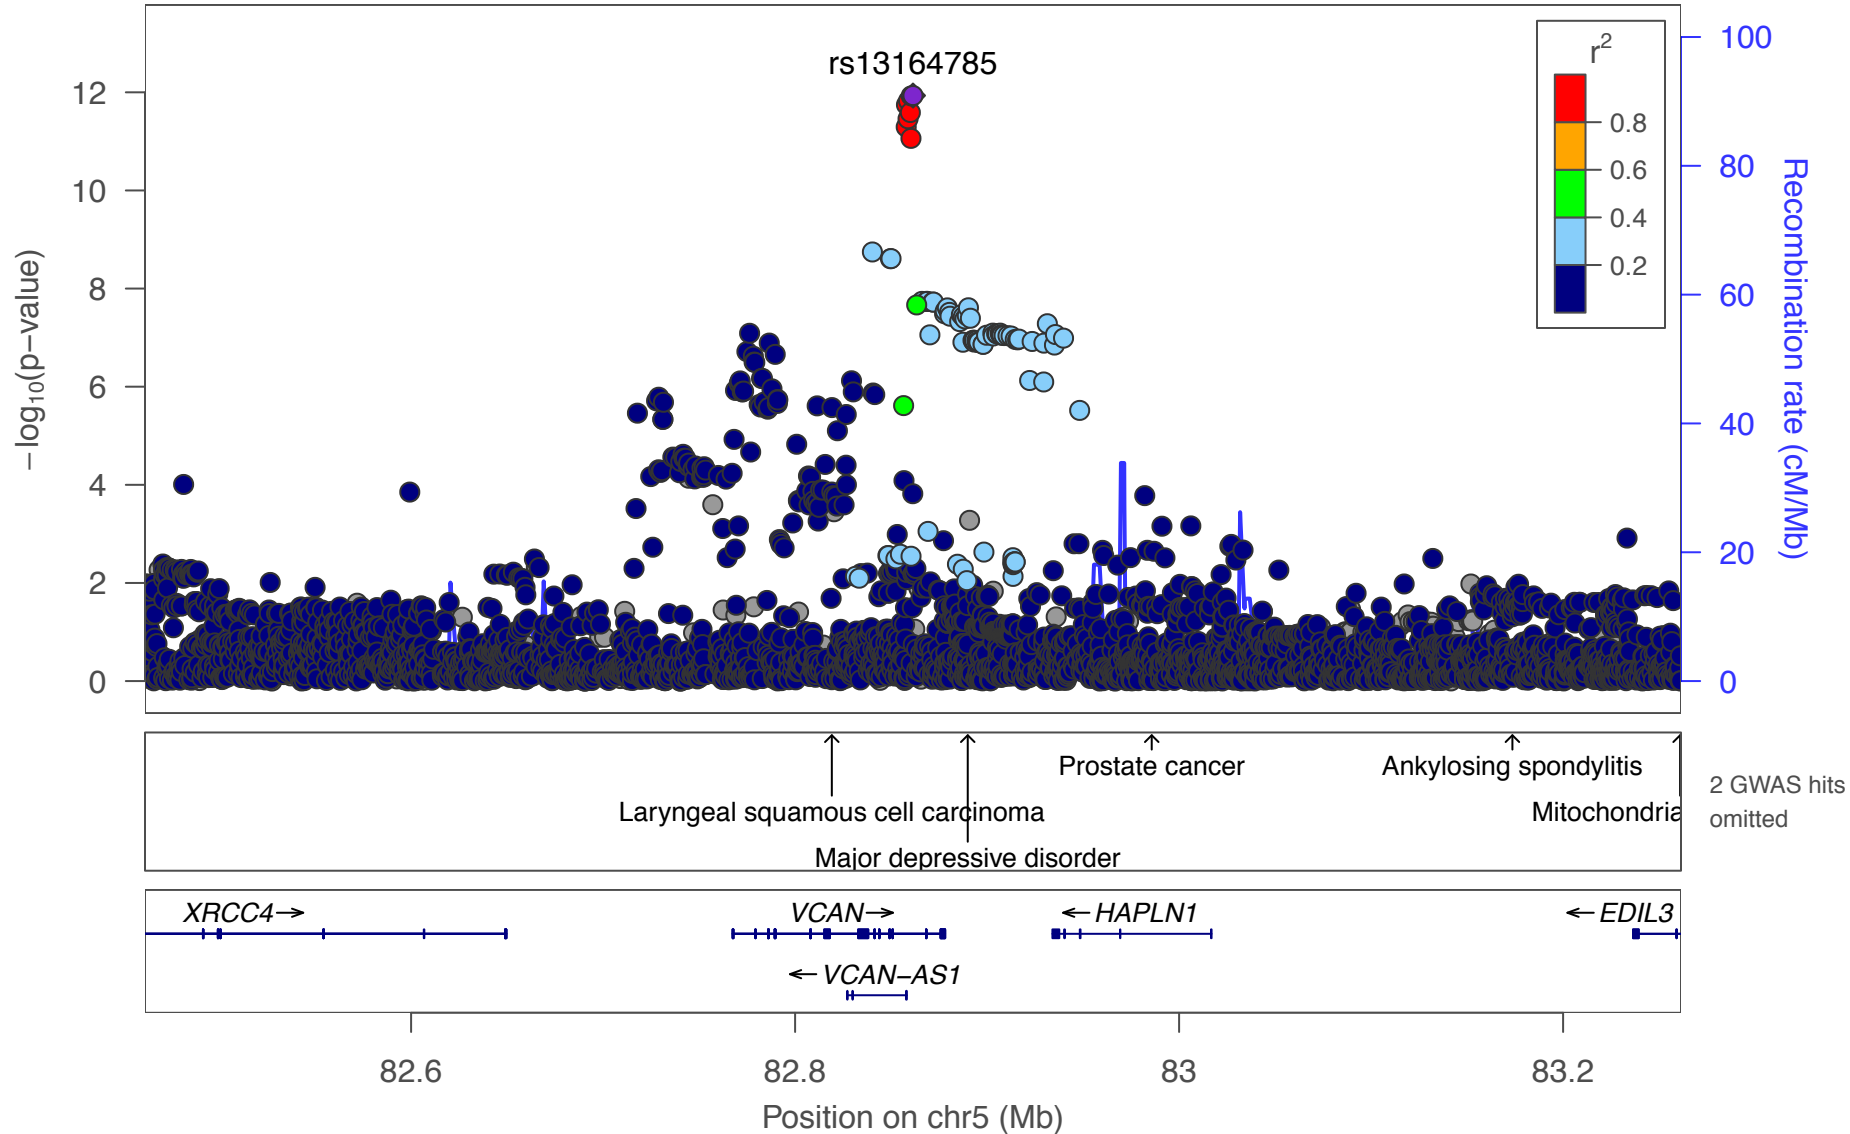

date: Thu Aug 17 17:52:01 2017

build: hg19

display range: chr5:82461400–83261400 [82461400–83261400]

hilite range: 0 – 0 [ 0 – 0 ]

reference SNP: chr5:82861400

number of SNPs plotted: 3396

min P.value: 1.16E–12 [chr5:82861400]

max P.value: 10E–1 [chr5:82966675]

omitted GWAS Hits: chr5:83.260938–Mitochondrial DNA levels, NA

## GWAS Catalog SNPs in Region

| <b>chr</b> | <b>pos (Mb)</b> | <b>trait</b>                      | <b>snp</b> |
|------------|-----------------|-----------------------------------|------------|
| 5          | 82.81912        | Laryngeal squamous cell carcinoma | rs310518   |
| 5          | 82.84549        | Diisocyanate-induced asthma       | rs3852186  |
| 5          | 82.88991        | Major depressive disorder         | rs310501   |
| 5          | 82.96073        | Visceral fat                      | rs3846635  |
| 5          | 82.98574        | Prostate cancer                   | rs4466137  |
| 5          | 83.17359        | Ankylosing spondylitis            | rs4552569  |
| 5          | 83.26094        | Mitochondrial DNA levels          | rs2301070  |

# TBSS\_L3\_External\_capsule\_L

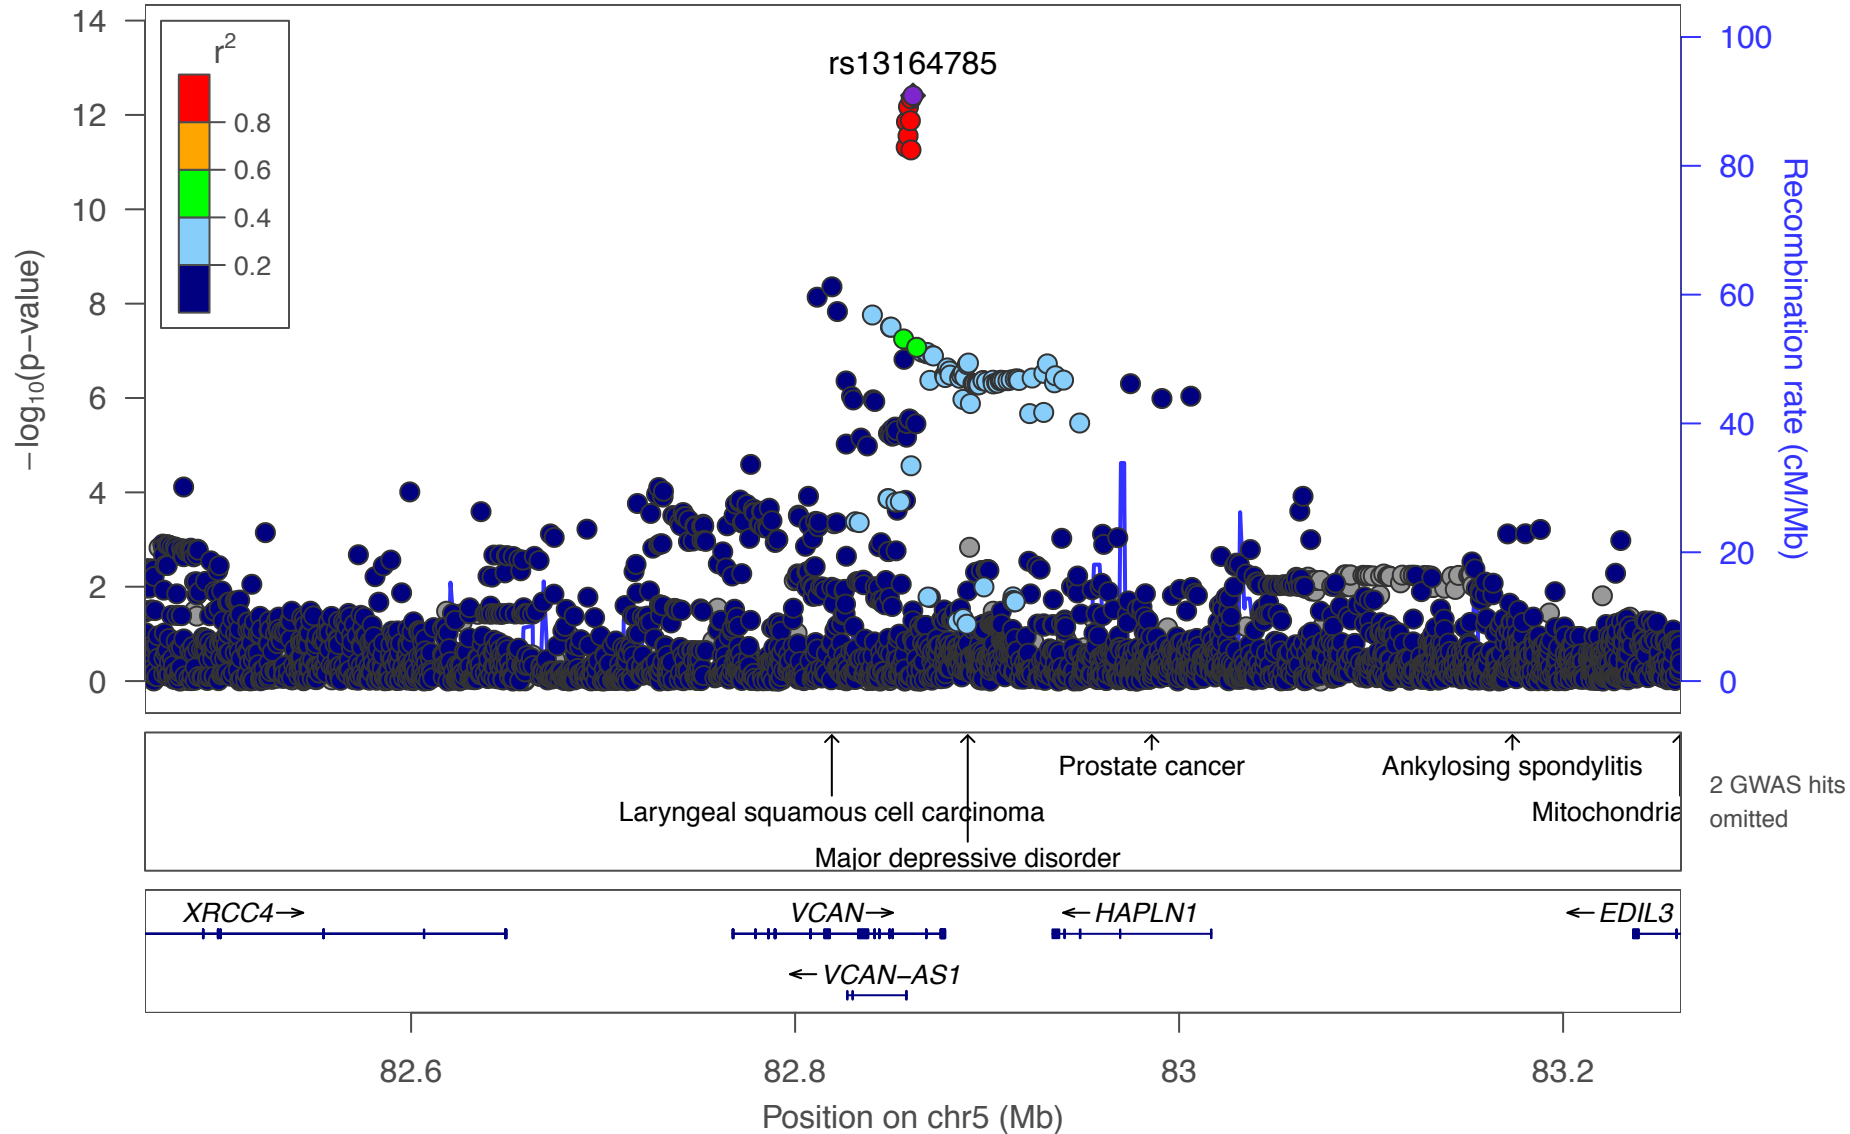



date: Thu Aug 17 17:52:01 2017

build: hg19

display range: chr5:82461400–83261400 [82461400–83261400]

hilite range: 0 – 0 [ 0 – 0 ]

reference SNP: chr5:82861400

number of SNPs plotted: 3396

min P.value: 3.88E–13 [chr5:82861400]

max P.value: 9.99E–1 [chr5:82864957]

omitted GWAS Hits: chr5:83.260938–Mitochondrial DNA levels, NA

## GWAS Catalog SNPs in Region

| <b>chr</b> | <b>pos (Mb)</b> | <b>trait</b>                      | <b>snp</b> |
|------------|-----------------|-----------------------------------|------------|
| 5          | 82.81912        | Laryngeal squamous cell carcinoma | rs310518   |
| 5          | 82.84549        | Diisocyanate-induced asthma       | rs3852186  |
| 5          | 82.88991        | Major depressive disorder         | rs310501   |
| 5          | 82.96073        | Visceral fat                      | rs3846635  |
| 5          | 82.98574        | Prostate cancer                   | rs4466137  |
| 5          | 83.17359        | Ankylosing spondylitis            | rs4552569  |
| 5          | 83.26094        | Mitochondrial DNA levels          | rs2301070  |

# TBSS\_L3\_Cingulum\_cingulate\_gyrus\_R

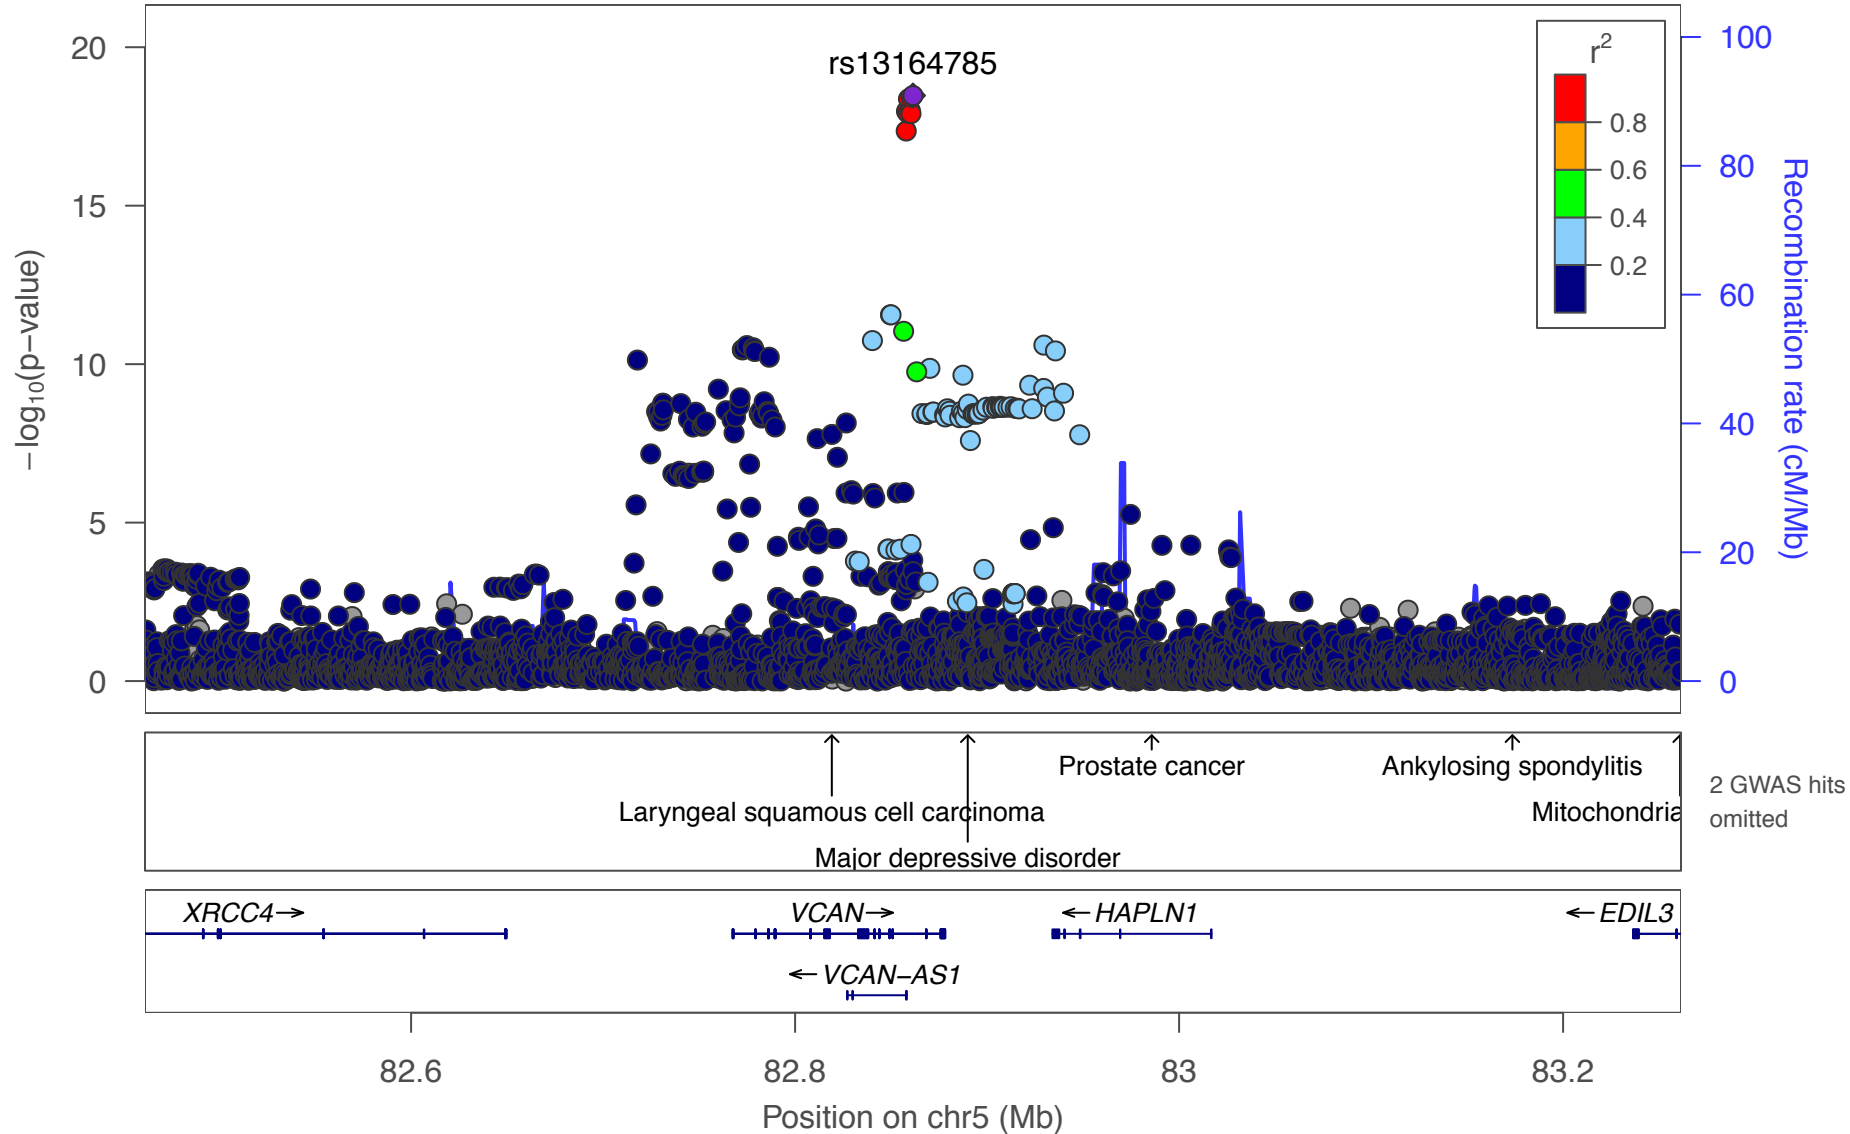

date: Thu Aug 17 17:52:01 2017

build: hg19

display range: chr5:82461400–83261400 [82461400–83261400]

hilite range: 0 – 0 [ 0 – 0 ]

reference SNP: chr5:82861400

number of SNPs plotted: 3396

min P.value: 3.35E–19 [chr5:82861400]

max P.value: 9.99E–1 [chr5:83229426]

omitted GWAS Hits: chr5:83.260938–Mitochondrial DNA levels, NA

## GWAS Catalog SNPs in Region

| <b>chr</b> | <b>pos (Mb)</b> | <b>trait</b>                      | <b>snp</b> |
|------------|-----------------|-----------------------------------|------------|
| 5          | 82.81912        | Laryngeal squamous cell carcinoma | rs310518   |
| 5          | 82.84549        | Diisocyanate-induced asthma       | rs3852186  |
| 5          | 82.88991        | Major depressive disorder         | rs310501   |
| 5          | 82.96073        | Visceral fat                      | rs3846635  |
| 5          | 82.98574        | Prostate cancer                   | rs4466137  |
| 5          | 83.17359        | Ankylosing spondylitis            | rs4552569  |
| 5          | 83.26094        | Mitochondrial DNA levels          | rs2301070  |

# TBSS\_L3\_Cingulum\_cingulate\_gyrus\_L

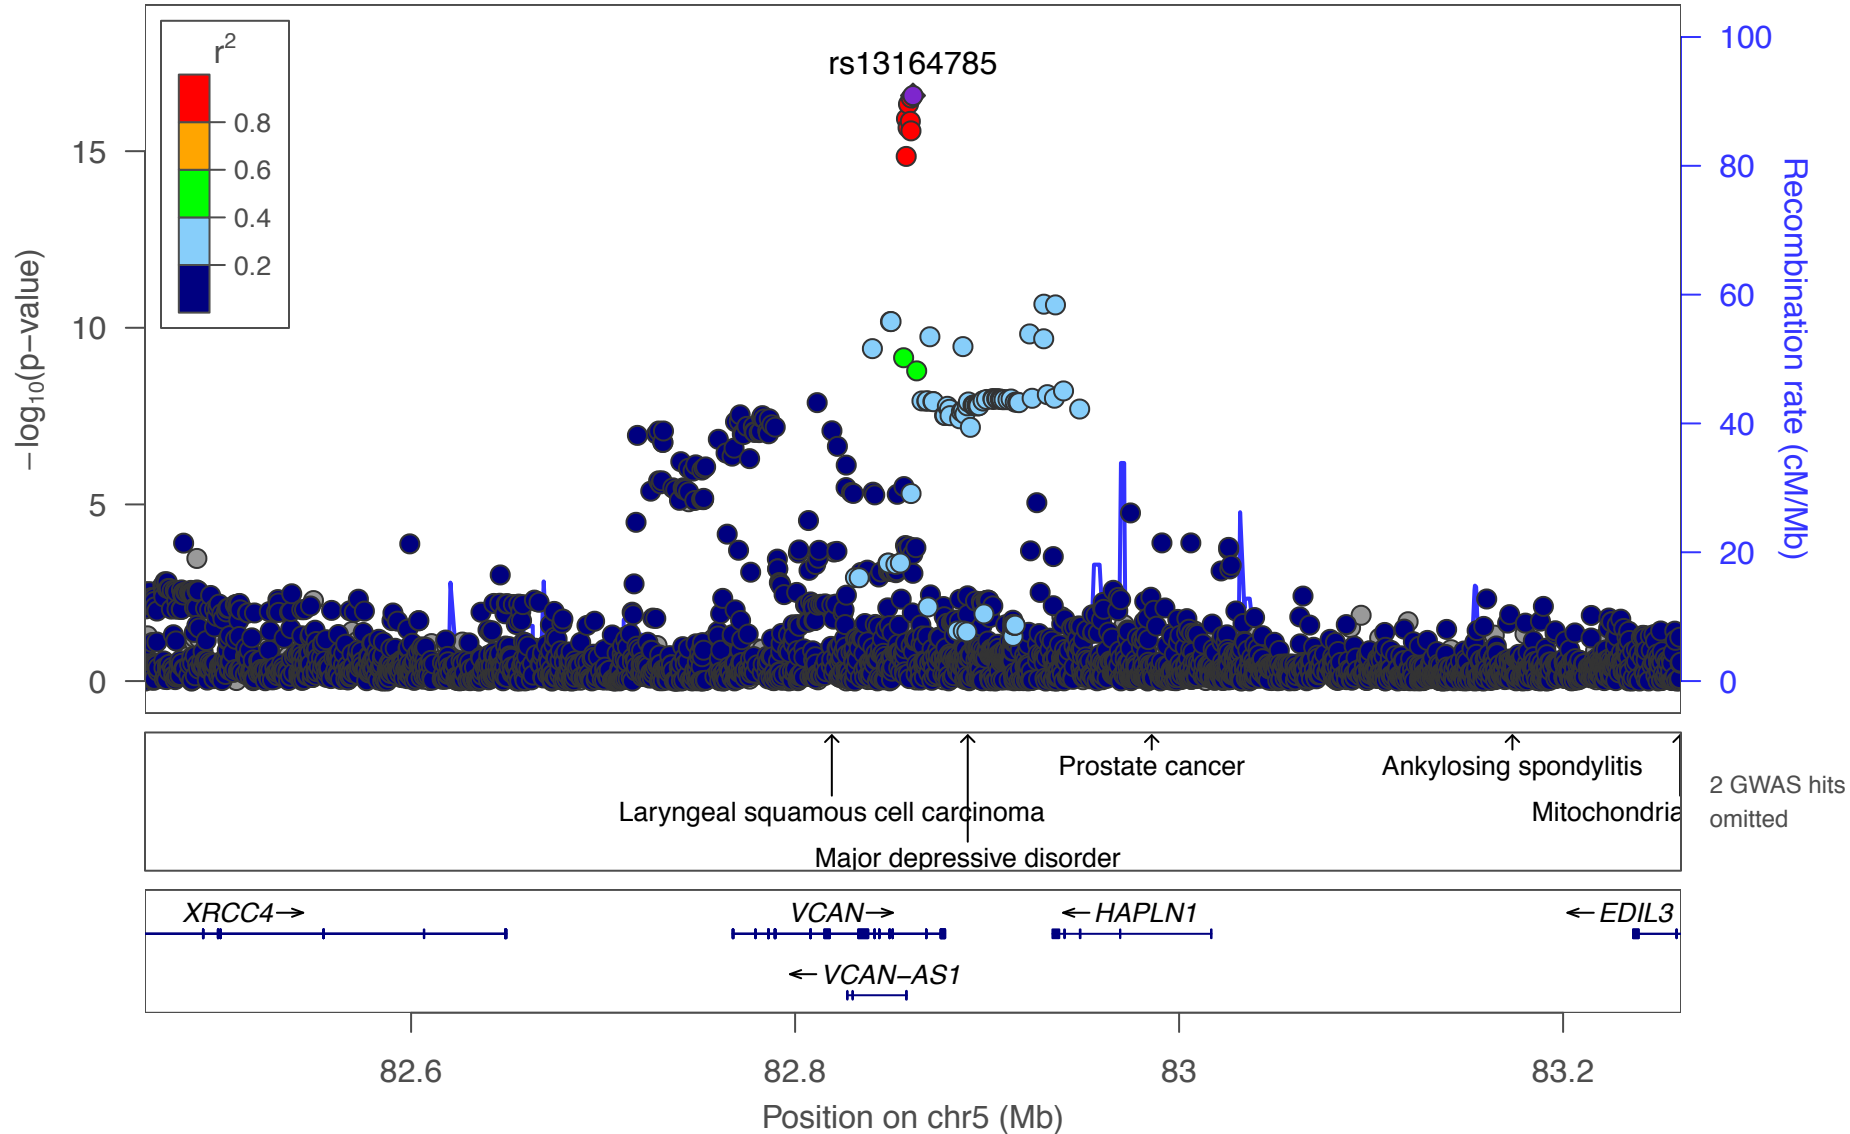

date: Thu Aug 17 17:52:01 2017

build: hg19

display range: chr5:82461400–83261400 [82461400–83261400]

hilite range: 0 – 0 [ 0 – 0 ]

reference SNP: chr5:82861400

number of SNPs plotted: 3396

min P.value: 2.67E–17 [chr5:82861400]

max P.value: 10E–1 [chr5:82485682]

omitted GWAS Hits: chr5:83.260938–Mitochondrial DNA levels, NA

## GWAS Catalog SNPs in Region

| <b>chr</b> | <b>pos (Mb)</b> | <b>trait</b>                      | <b>snp</b> |
|------------|-----------------|-----------------------------------|------------|
| 5          | 82.81912        | Laryngeal squamous cell carcinoma | rs310518   |
| 5          | 82.84549        | Diisocyanate-induced asthma       | rs3852186  |
| 5          | 82.88991        | Major depressive disorder         | rs310501   |
| 5          | 82.96073        | Visceral fat                      | rs3846635  |
| 5          | 82.98574        | Prostate cancer                   | rs4466137  |
| 5          | 83.17359        | Ankylosing spondylitis            | rs4552569  |
| 5          | 83.26094        | Mitochondrial DNA levels          | rs2301070  |



# TBSS\_L3\_Cingulum\_hippocampus\_R

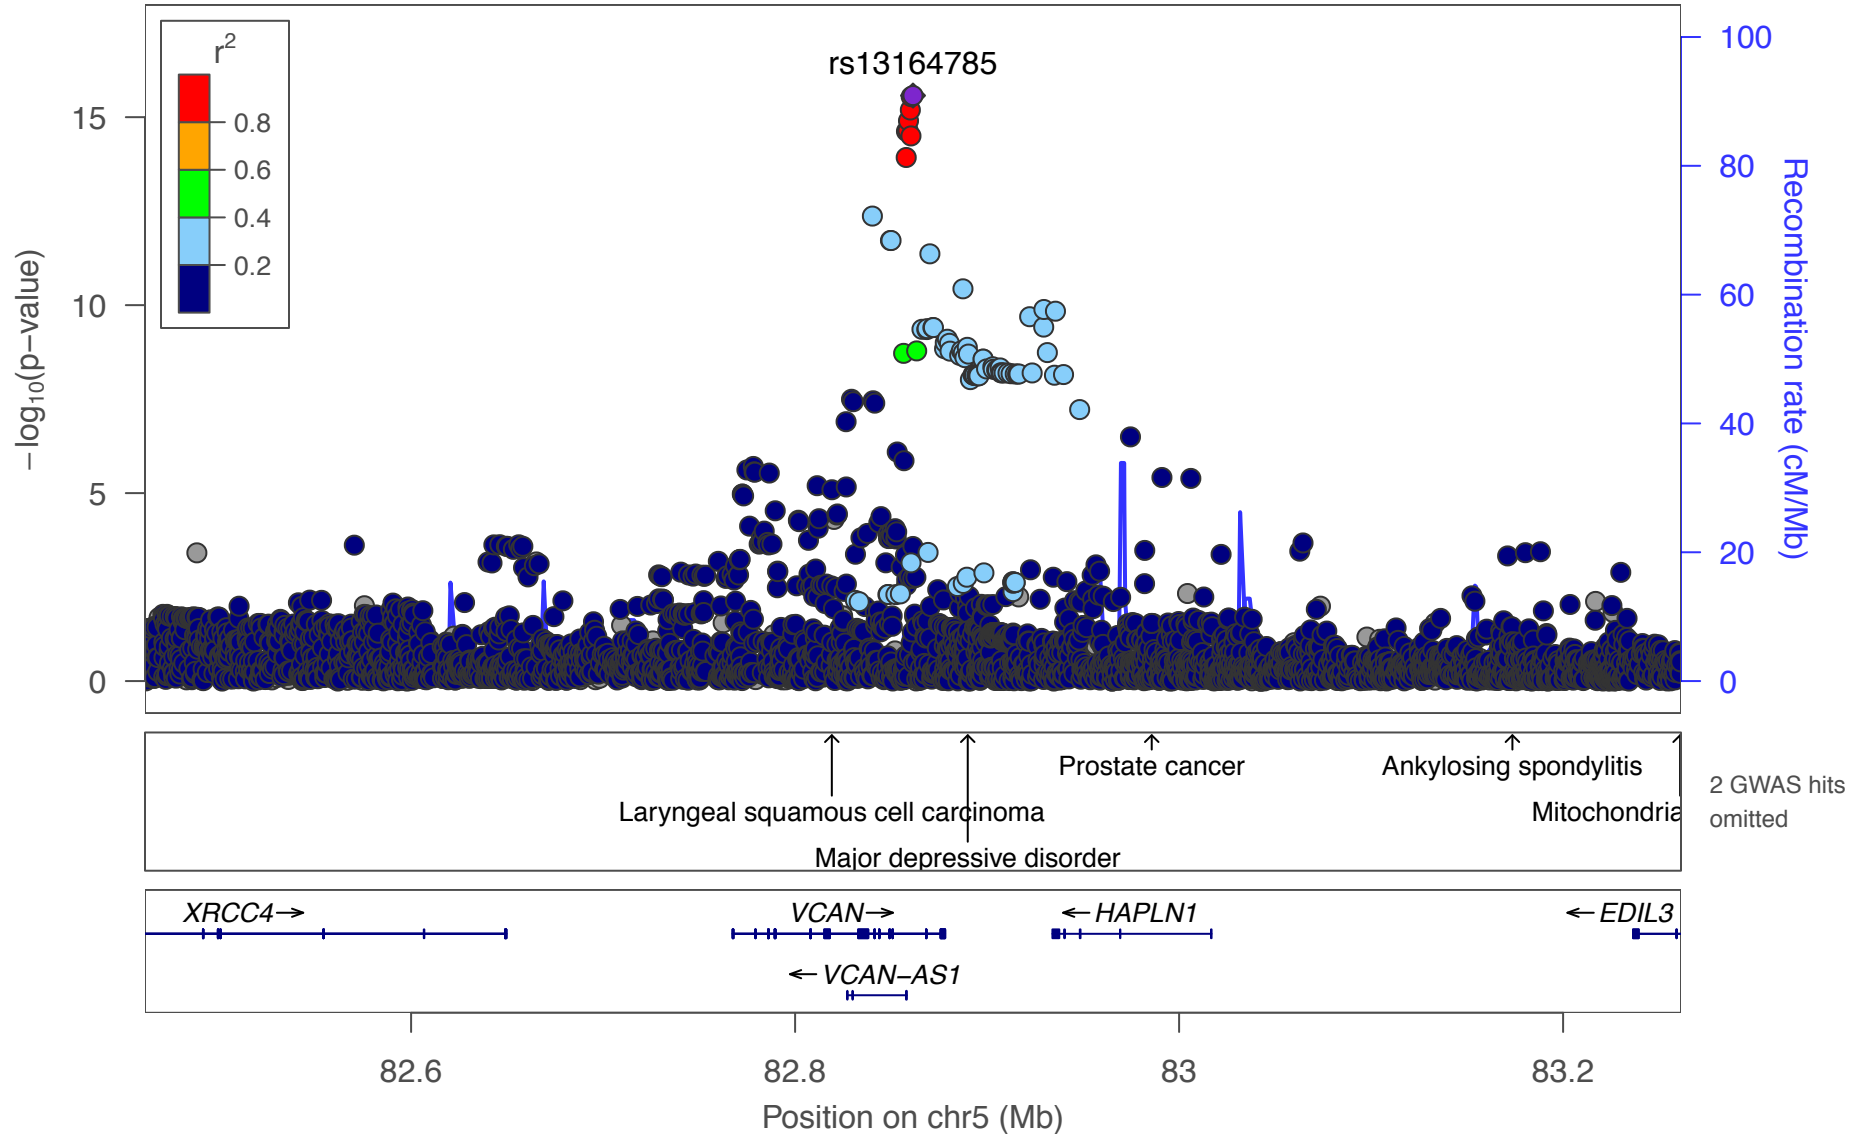

date: Thu Aug 17 17:55:19 2017

build: hg19

display range: chr5:82461400–83261400 [82461400–83261400]

hilite range: 0 – 0 [ 0 – 0 ]

reference SNP: chr5:82861400

number of SNPs plotted: 3396

min P.value: 2.66E–16 [chr5:82861400]

max P.value: 9.99E–1 [chr5:82597893]

omitted GWAS Hits: chr5:83.260938–Mitochondrial DNA levels, NA

## GWAS Catalog SNPs in Region

| <b>chr</b> | <b>pos (Mb)</b> | <b>trait</b>                      | <b>snp</b> |
|------------|-----------------|-----------------------------------|------------|
| 5          | 82.81912        | Laryngeal squamous cell carcinoma | rs310518   |
| 5          | 82.84549        | Diisocyanate-induced asthma       | rs3852186  |
| 5          | 82.88991        | Major depressive disorder         | rs310501   |
| 5          | 82.96073        | Visceral fat                      | rs3846635  |
| 5          | 82.98574        | Prostate cancer                   | rs4466137  |
| 5          | 83.17359        | Ankylosing spondylitis            | rs4552569  |
| 5          | 83.26094        | Mitochondrial DNA levels          | rs2301070  |

# TBSS\_L3\_Cingulum\_hippocampus\_L

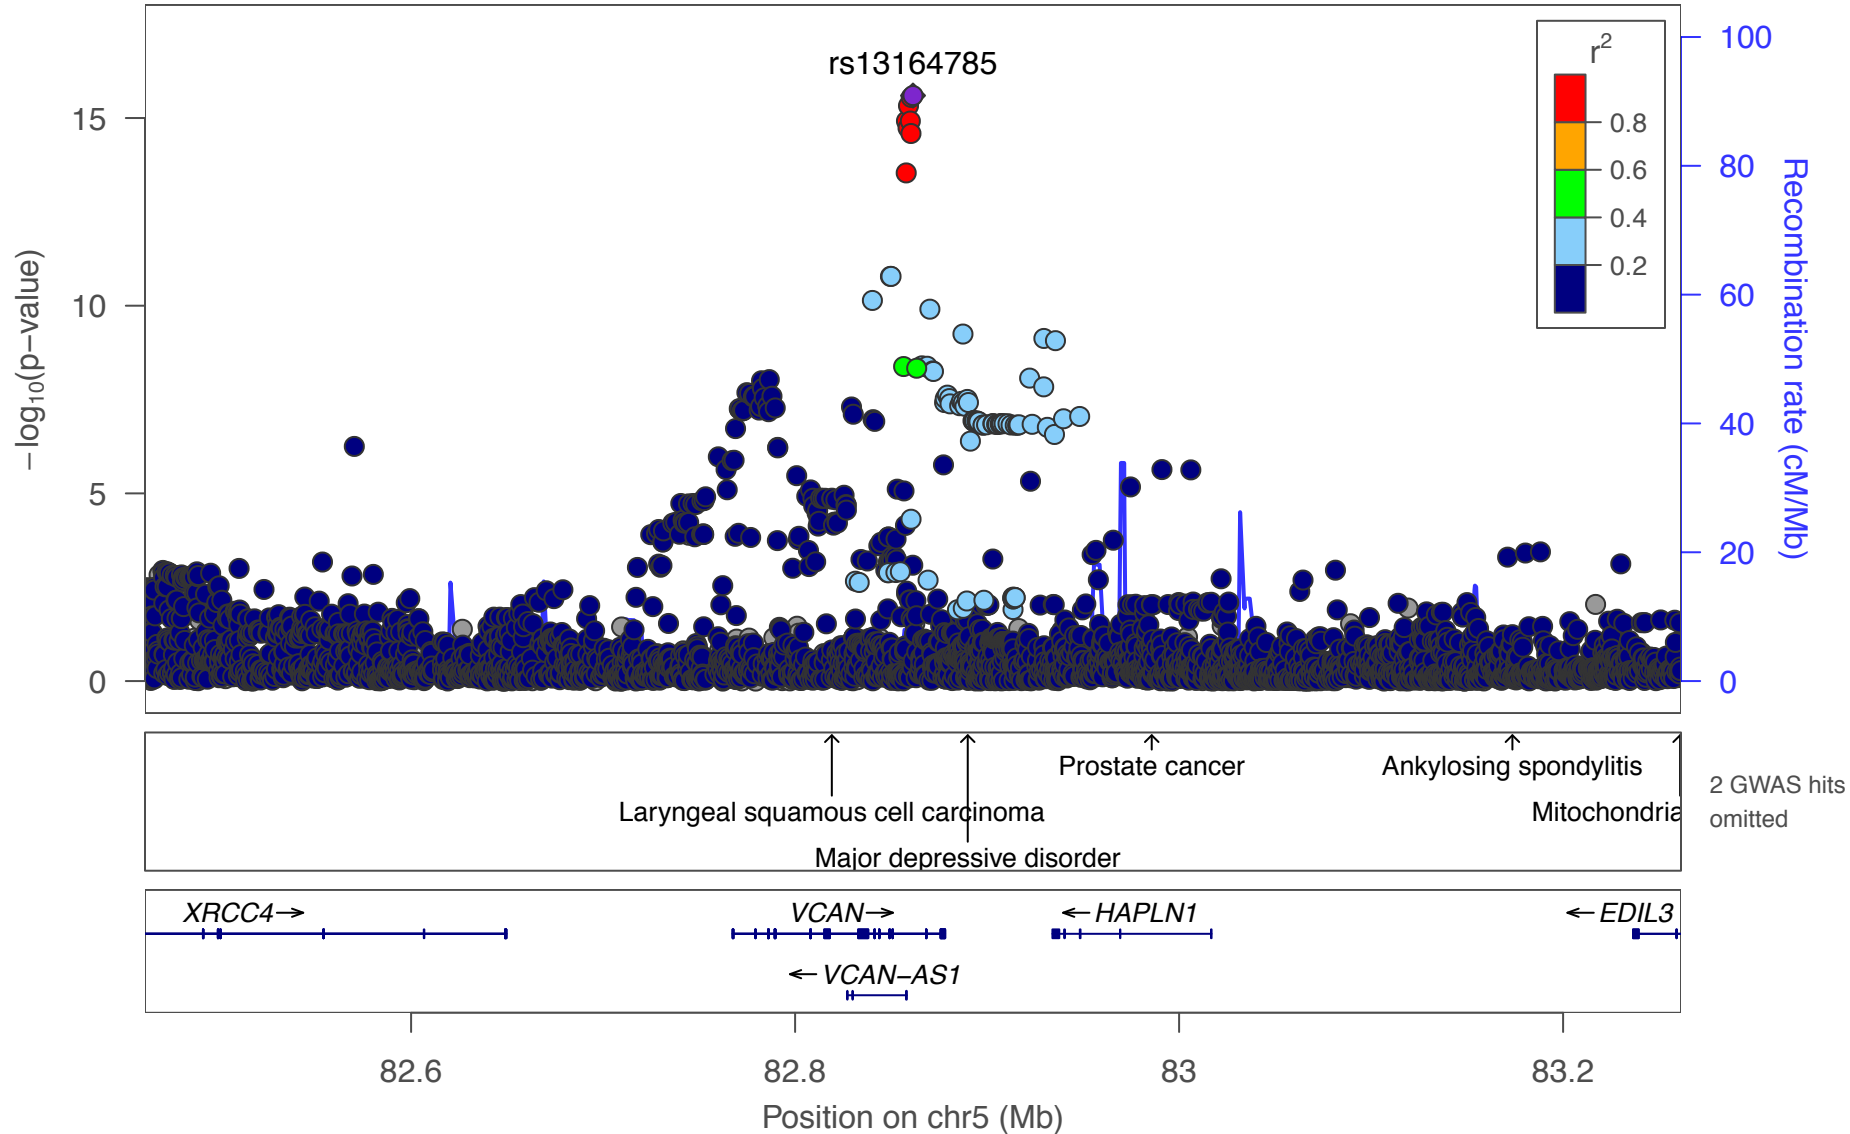

date: Thu Aug 17 17:55:19 2017

build: hg19

display range: chr5:82461400–83261400 [82461400–83261400]

hilite range: 0 – 0 [ 0 – 0 ]

reference SNP: chr5:82861400

number of SNPs plotted: 3396

min P.value: 2.52E–16 [chr5:82861400]

max P.value: 10E–1 [chr5:82779454]

omitted GWAS Hits: chr5:83.260938–Mitochondrial DNA levels, NA

## GWAS Catalog SNPs in Region

| <b>chr</b> | <b>pos (Mb)</b> | <b>trait</b>                      | <b>snp</b> |
|------------|-----------------|-----------------------------------|------------|
| 5          | 82.81912        | Laryngeal squamous cell carcinoma | rs310518   |
| 5          | 82.84549        | Diisocyanate-induced asthma       | rs3852186  |
| 5          | 82.88991        | Major depressive disorder         | rs310501   |
| 5          | 82.96073        | Visceral fat                      | rs3846635  |
| 5          | 82.98574        | Prostate cancer                   | rs4466137  |
| 5          | 83.17359        | Ankylosing spondylitis            | rs4552569  |
| 5          | 83.26094        | Mitochondrial DNA levels          | rs2301070  |

# TBSS\_L3\_Superior\_longitudinal\_fasciculus\_L

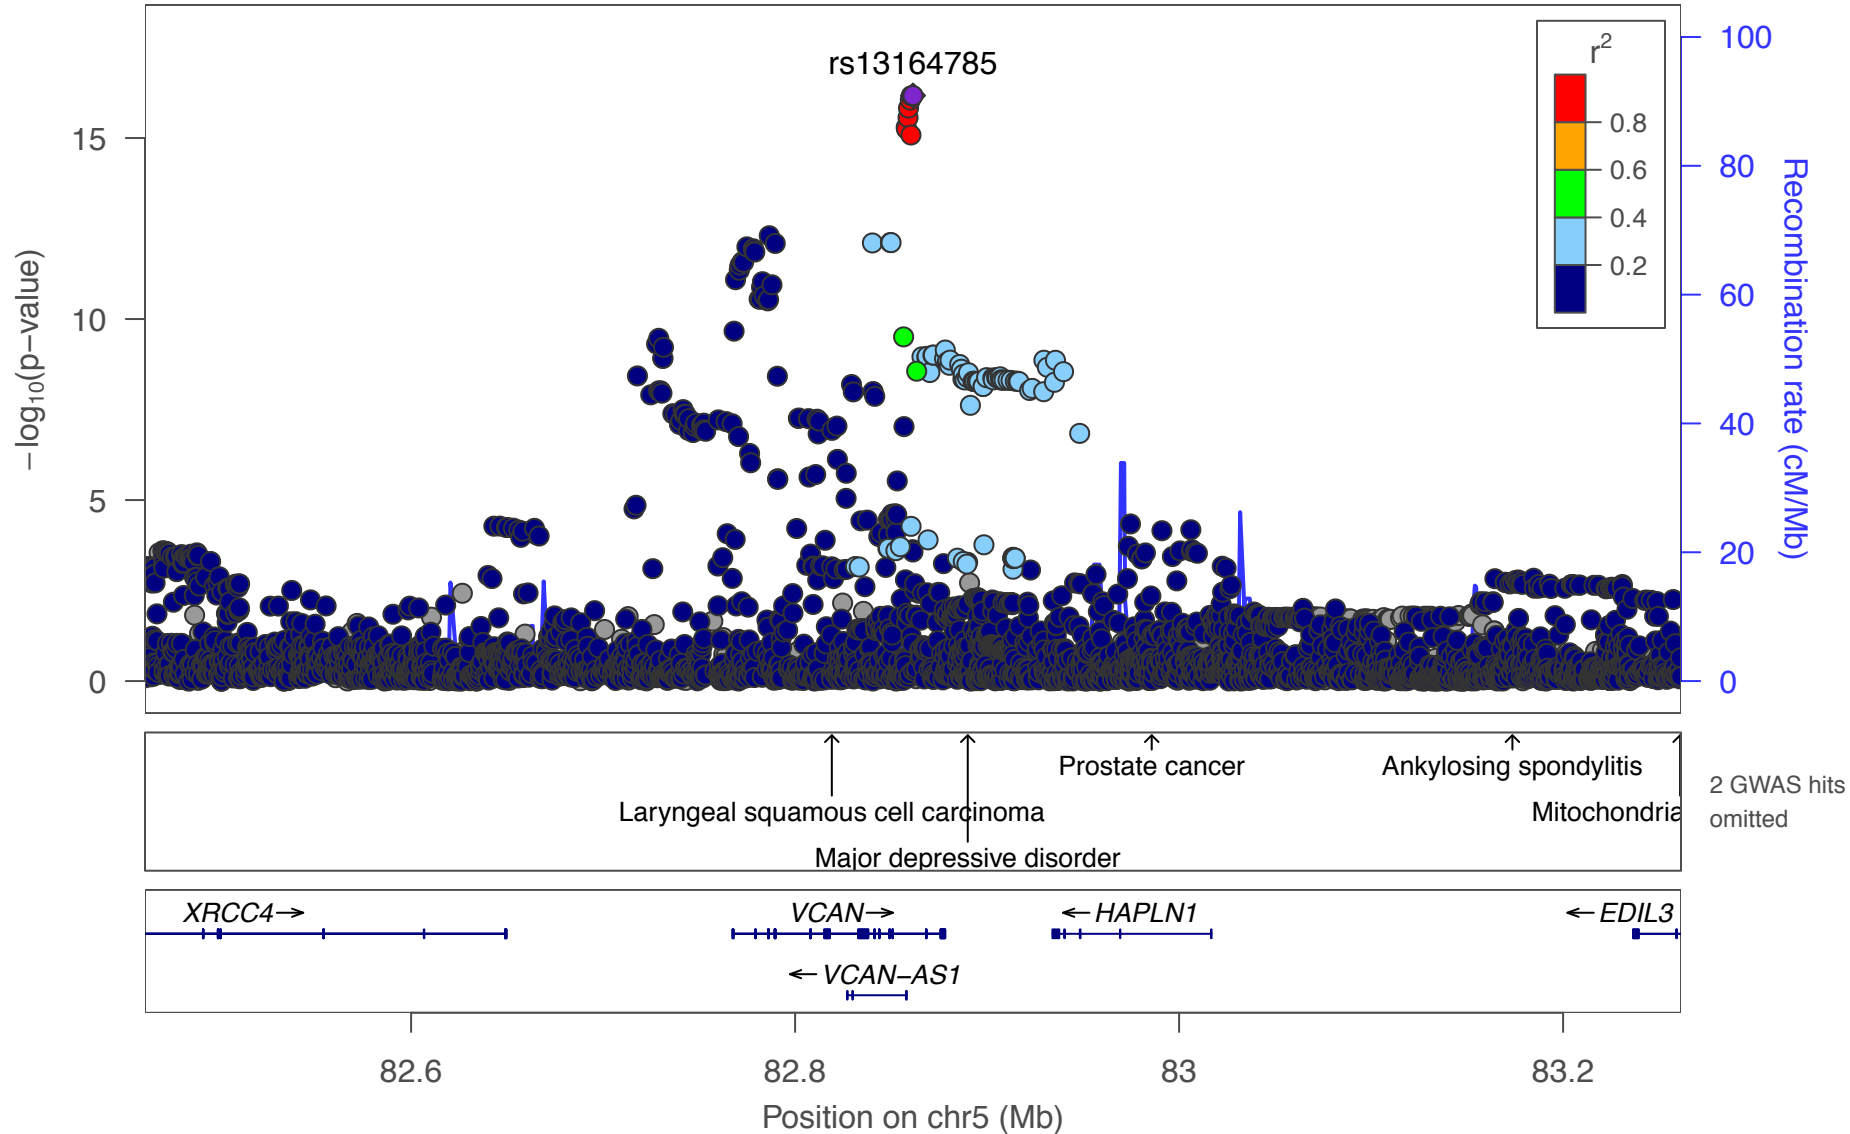

date: Thu Aug 17 17:55:19 2017

build: hg19

display range: chr5:82461400–83261400 [82461400–83261400]

hilite range: 0 – 0 [ 0 – 0 ]

reference SNP: chr5:82861400

number of SNPs plotted: 3396

min P.value: 6.71E–17 [chr5:82861400]

max P.value: 10E–1 [chr5:82959109]

omitted GWAS Hits: chr5:83.260938–Mitochondrial DNA levels, NA



## GWAS Catalog SNPs in Region

| <b>chr</b> | <b>pos (Mb)</b> | <b>trait</b>                      | <b>snp</b> |
|------------|-----------------|-----------------------------------|------------|
| 5          | 82.81912        | Laryngeal squamous cell carcinoma | rs310518   |
| 5          | 82.84549        | Diisocyanate-induced asthma       | rs3852186  |
| 5          | 82.88991        | Major depressive disorder         | rs310501   |
| 5          | 82.96073        | Visceral fat                      | rs3846635  |
| 5          | 82.98574        | Prostate cancer                   | rs4466137  |
| 5          | 83.17359        | Ankylosing spondylitis            | rs4552569  |
| 5          | 83.26094        | Mitochondrial DNA levels          | rs2301070  |

# TBSS\_ICVF\_Genu\_of\_corpus\_callosum

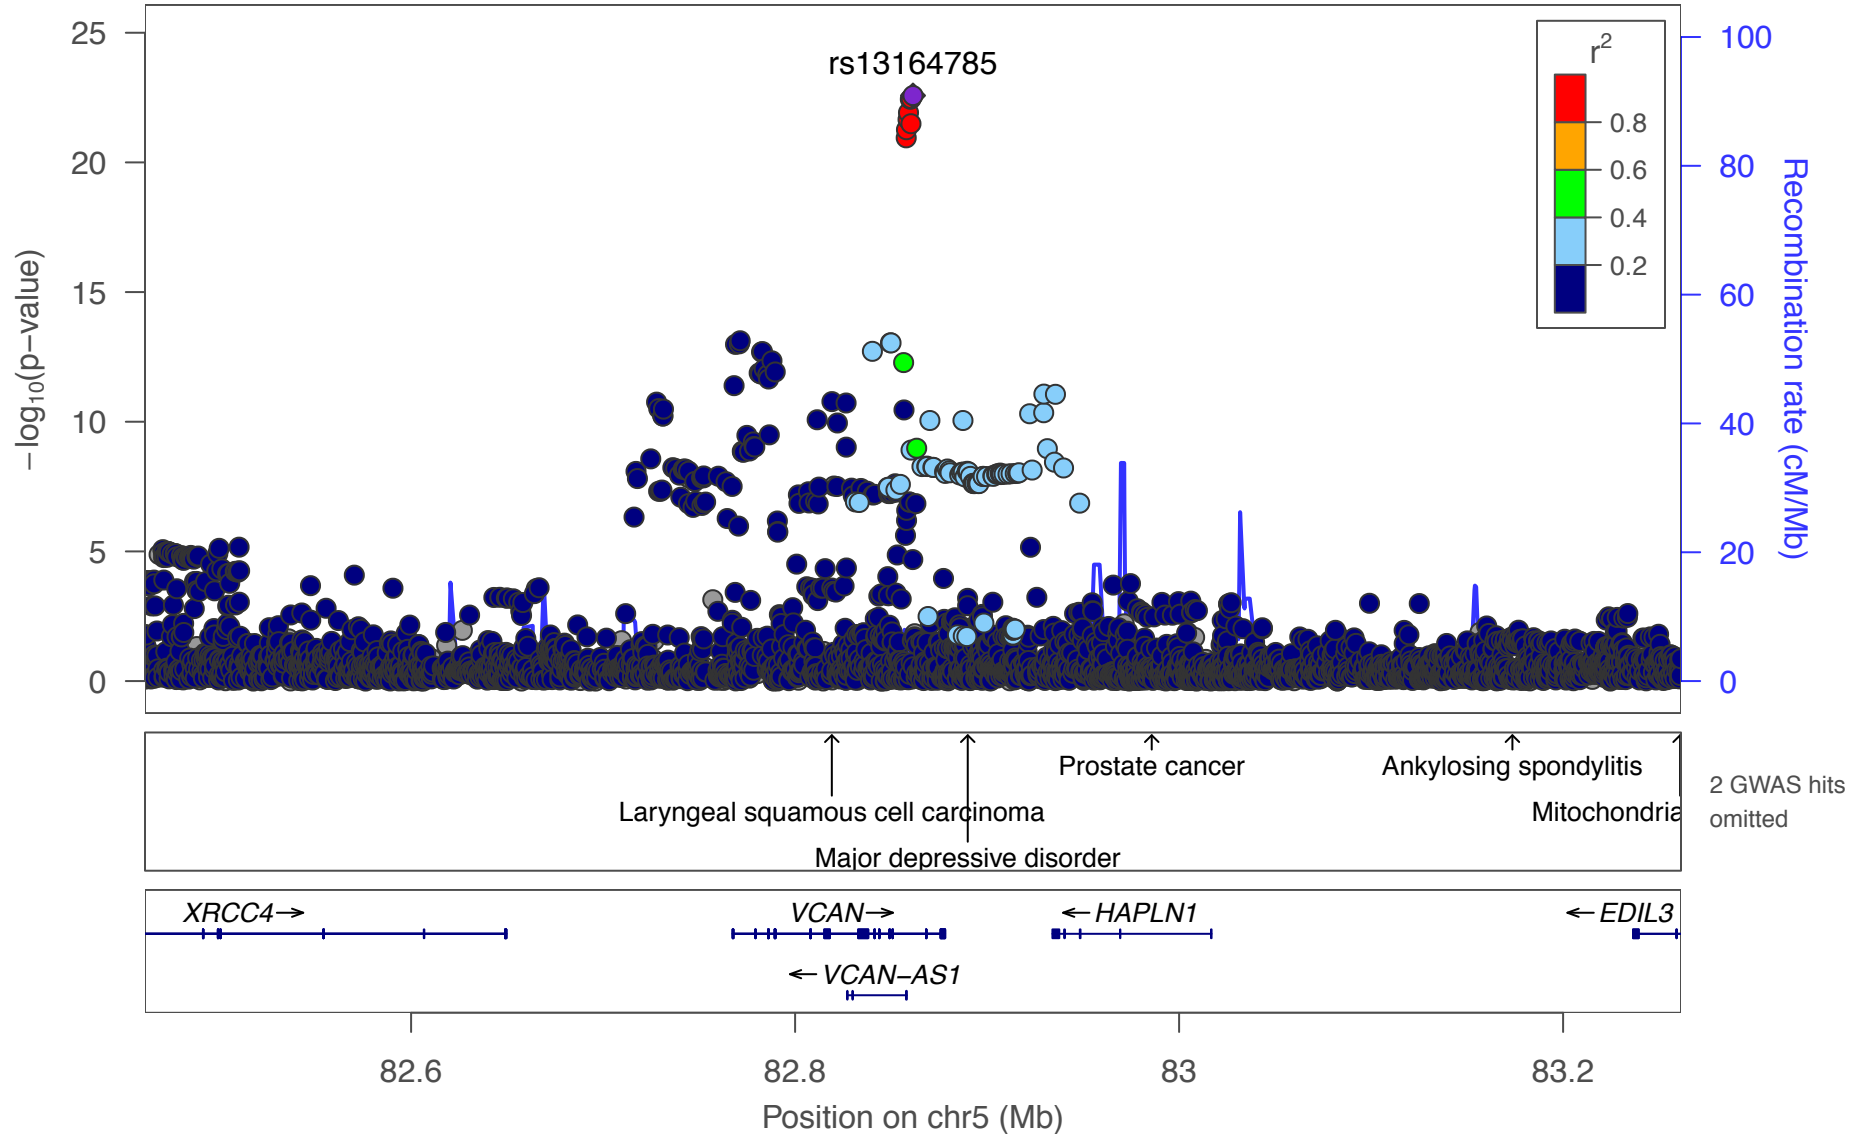

date: Thu Aug 17 17:55:19 2017

build: hg19

display range: chr5:82461400–83261400 [82461400–83261400]

hilite range: 0 – 0 [ 0 – 0 ]

reference SNP: chr5:82861400

number of SNPs plotted: 3396

min P.value: 2.64E–23 [chr5:82861400]

max P.value: 9.99E–1 [chr5:83009083]

omitted GWAS Hits: chr5:83.260938–Mitochondrial DNA levels, NA

## GWAS Catalog SNPs in Region

| <b>chr</b> | <b>pos (Mb)</b> | <b>trait</b>                      | <b>snp</b> |
|------------|-----------------|-----------------------------------|------------|
| 5          | 82.81912        | Laryngeal squamous cell carcinoma | rs310518   |
| 5          | 82.84549        | Diisocyanate-induced asthma       | rs3852186  |
| 5          | 82.88991        | Major depressive disorder         | rs310501   |
| 5          | 82.96073        | Visceral fat                      | rs3846635  |
| 5          | 82.98574        | Prostate cancer                   | rs4466137  |
| 5          | 83.17359        | Ankylosing spondylitis            | rs4552569  |
| 5          | 83.26094        | Mitochondrial DNA levels          | rs2301070  |

# TBSS\_ICVF\_Superior\_cerebellar\_peduncle\_R

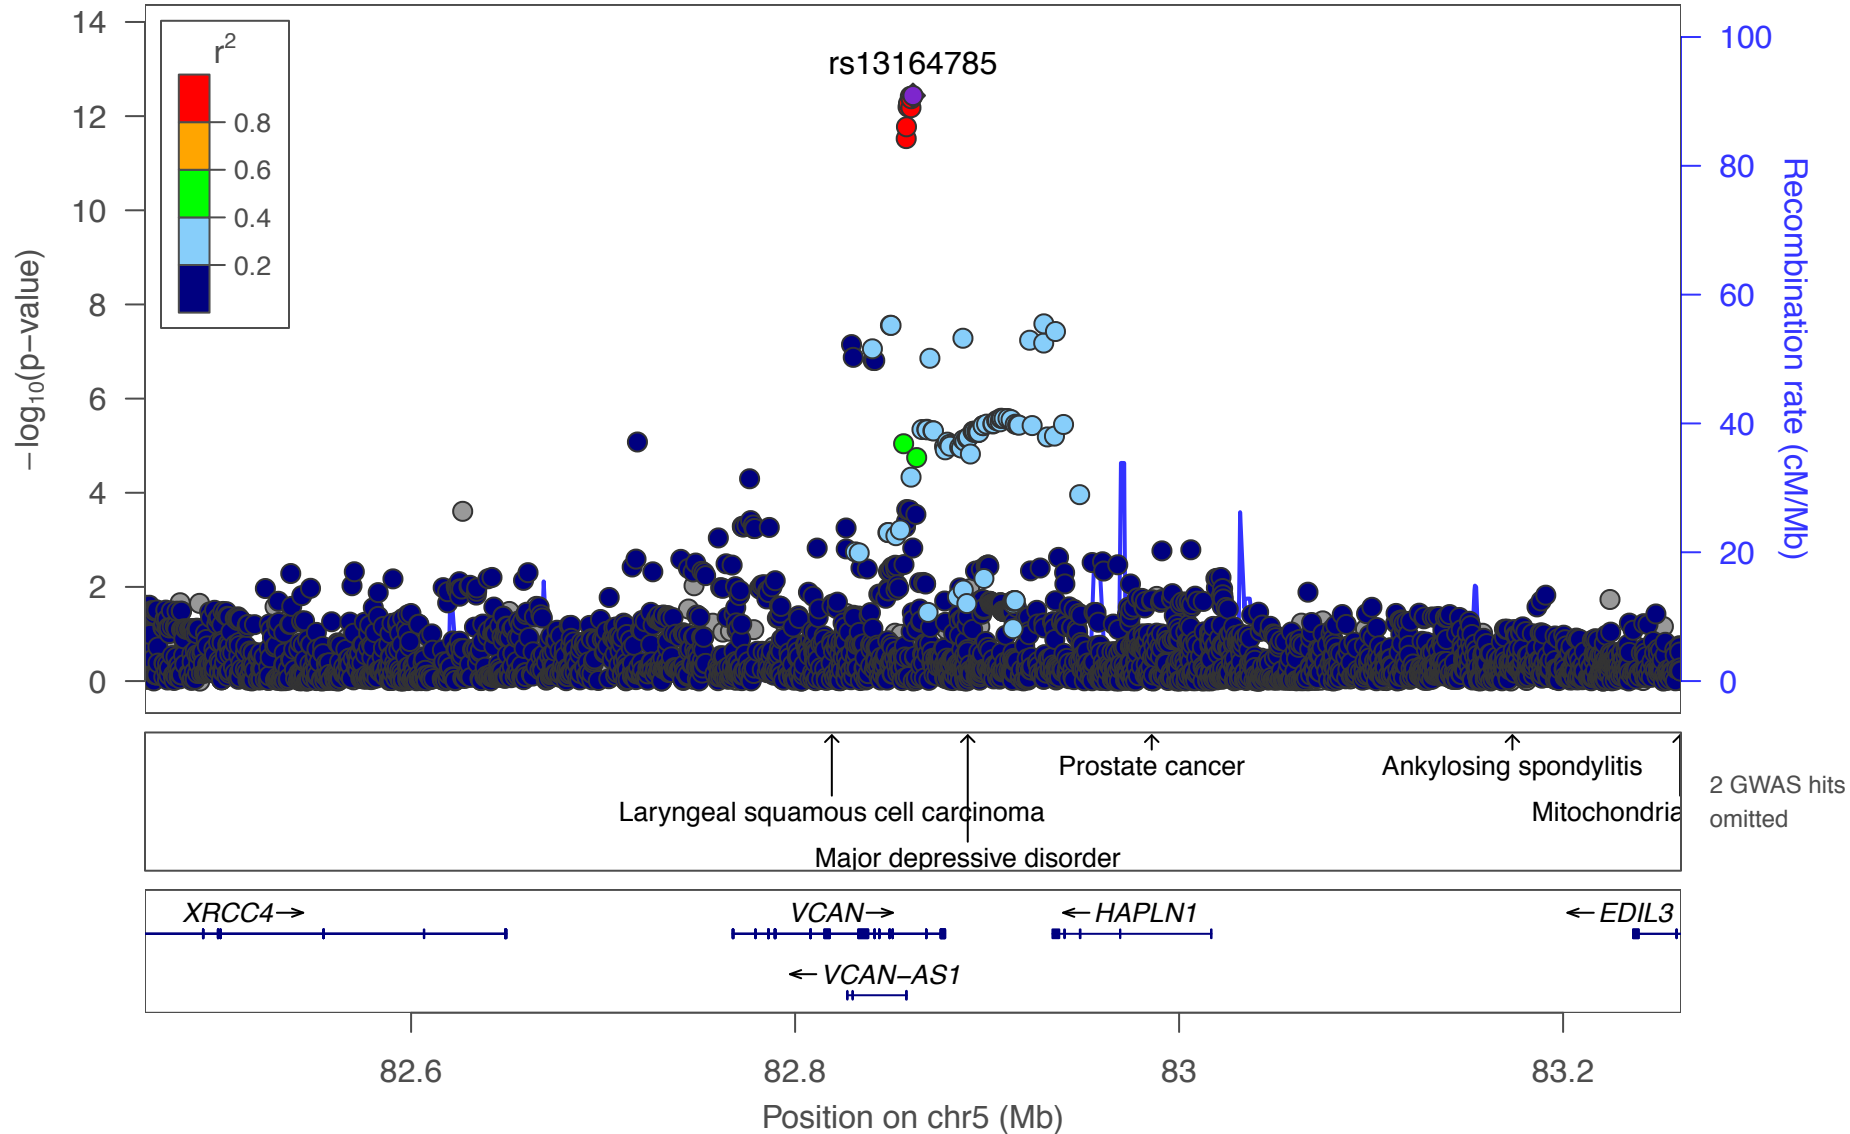

date: Thu Aug 17 17:55:19 2017

build: hg19

display range: chr5:82461400–83261400 [82461400–83261400]

hilite range: 0 – 0 [ 0 – 0 ]

reference SNP: chr5:82861400

number of SNPs plotted: 3396

min P.value: 3.66E–13 [chr5:82861400]

max P.value: 9.99E–1 [chr5:82489975]

omitted GWAS Hits: chr5:83.260938–Mitochondrial DNA levels, NA

## GWAS Catalog SNPs in Region

| <b>chr</b> | <b>pos (Mb)</b> | <b>trait</b>                      | <b>snp</b> |
|------------|-----------------|-----------------------------------|------------|
| 5          | 82.81912        | Laryngeal squamous cell carcinoma | rs310518   |
| 5          | 82.84549        | Diisocyanate-induced asthma       | rs3852186  |
| 5          | 82.88991        | Major depressive disorder         | rs310501   |
| 5          | 82.96073        | Visceral fat                      | rs3846635  |
| 5          | 82.98574        | Prostate cancer                   | rs4466137  |
| 5          | 83.17359        | Ankylosing spondylitis            | rs4552569  |
| 5          | 83.26094        | Mitochondrial DNA levels          | rs2301070  |

# TBSS\_ICVF\_Anterior\_limb\_of\_internal\_capsule\_R

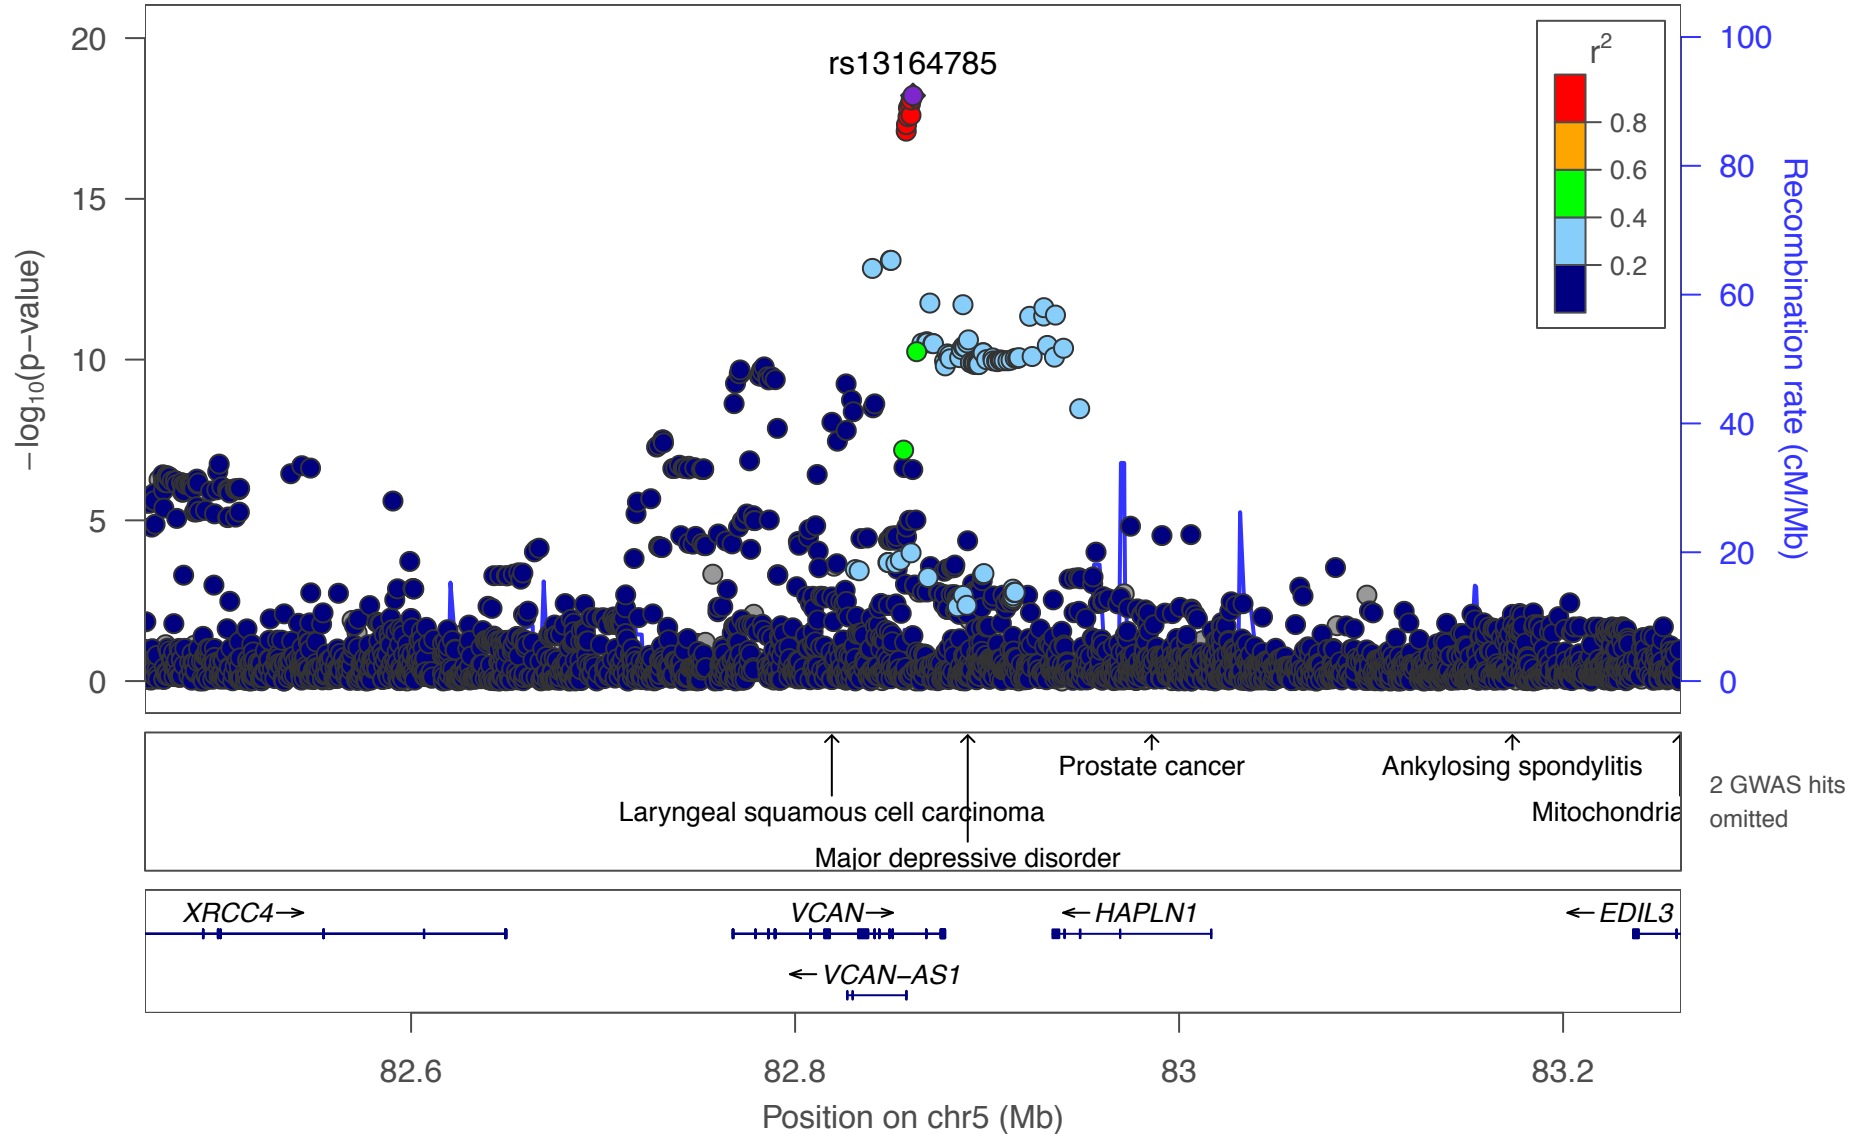



date: Thu Aug 17 17:55:19 2017

build: hg19

display range: chr5:82461400–83261400 [82461400–83261400]

hilite range: 0 – 0 [ 0 – 0 ]

reference SNP: chr5:82861400

number of SNPs plotted: 3396

min P.value: 6.12E–19 [chr5:82861400]

max P.value: 10E–1 [chr5:83037028]

omitted GWAS Hits: chr5:83.260938–Mitochondrial DNA levels, NA

## GWAS Catalog SNPs in Region

| <b>chr</b> | <b>pos (Mb)</b> | <b>trait</b>                      | <b>snp</b> |
|------------|-----------------|-----------------------------------|------------|
| 5          | 82.81912        | Laryngeal squamous cell carcinoma | rs310518   |
| 5          | 82.84549        | Diisocyanate-induced asthma       | rs3852186  |
| 5          | 82.88991        | Major depressive disorder         | rs310501   |
| 5          | 82.96073        | Visceral fat                      | rs3846635  |
| 5          | 82.98574        | Prostate cancer                   | rs4466137  |
| 5          | 83.17359        | Ankylosing spondylitis            | rs4552569  |
| 5          | 83.26094        | Mitochondrial DNA levels          | rs2301070  |

# TBSS\_ICVF\_Anterior\_limb\_of\_internal\_capsule\_L

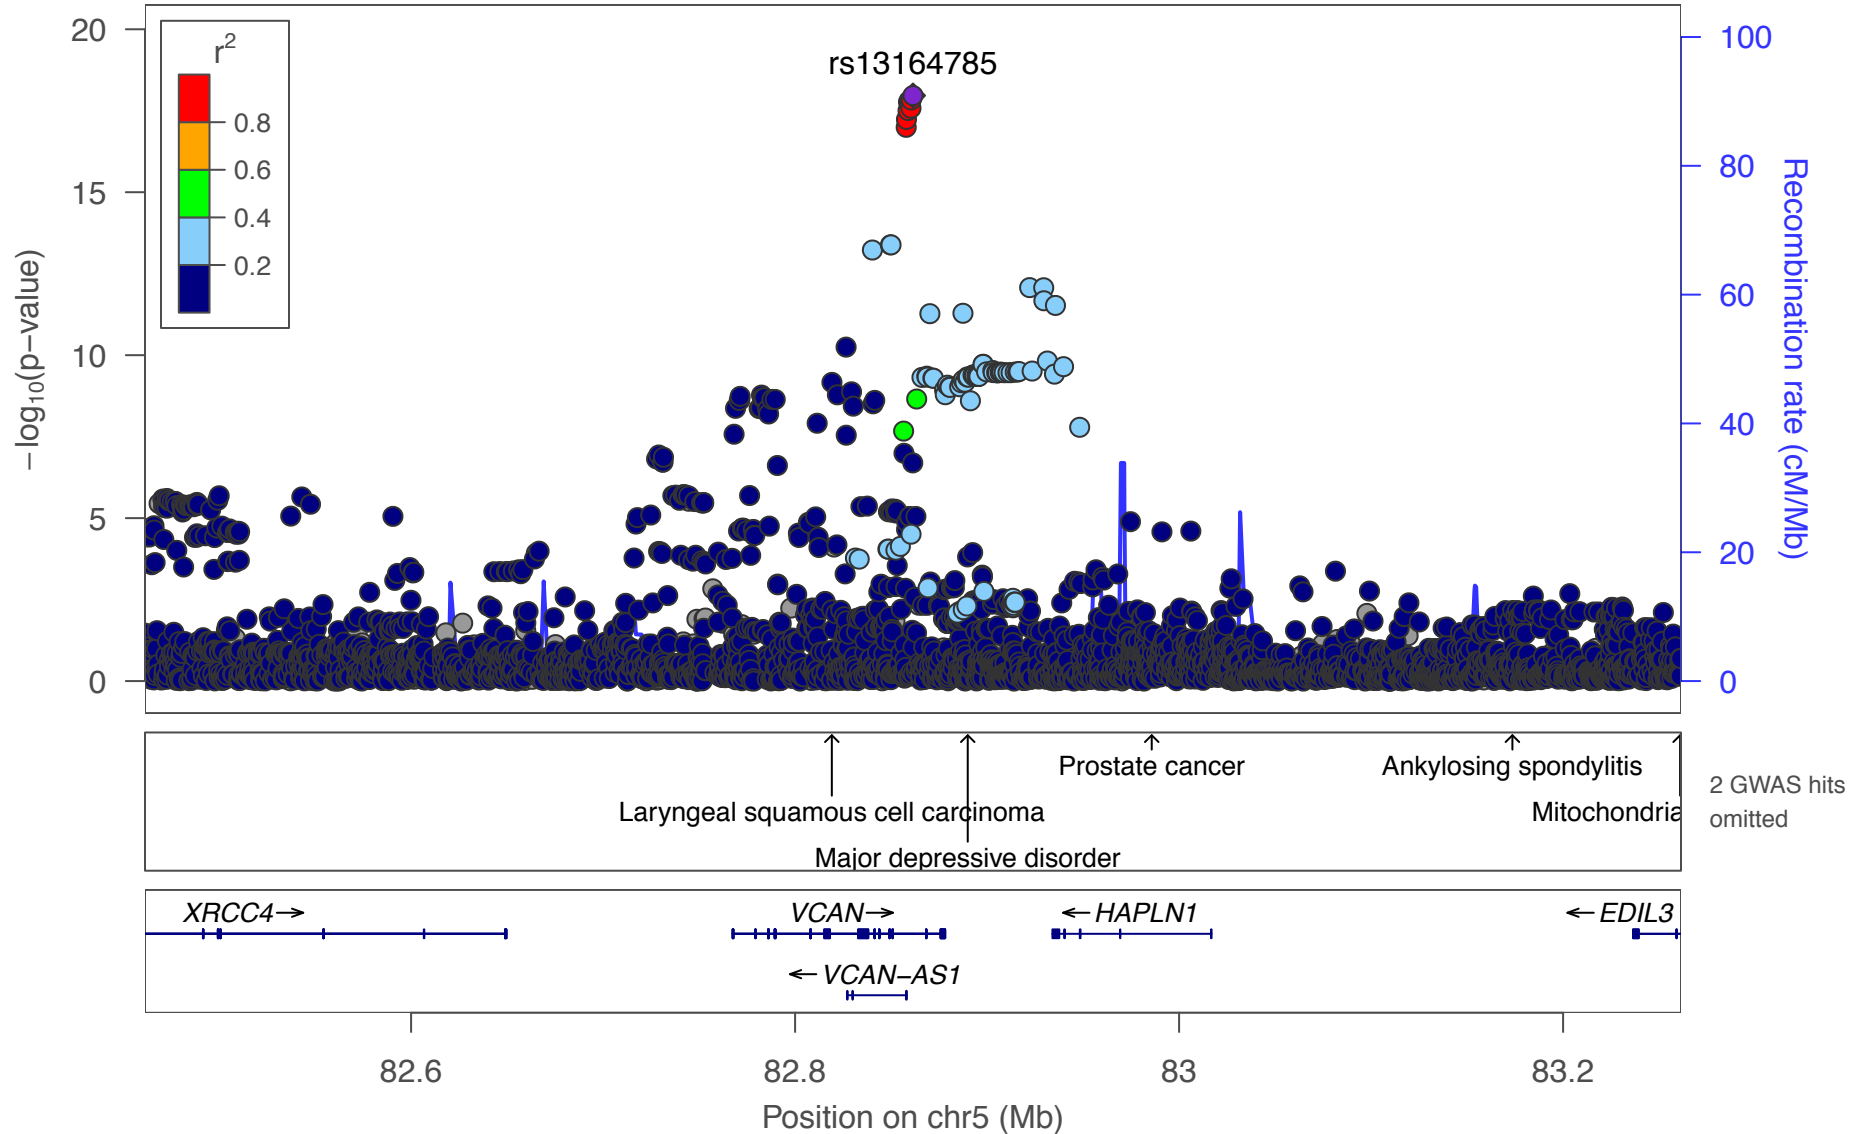

date: Thu Aug 17 17:55:19 2017

build: hg19

display range: chr5:82461400–83261400 [82461400–83261400]

hilite range: 0 – 0 [ 0 – 0 ]

reference SNP: chr5:82861400

number of SNPs plotted: 3396

min P.value: 1.08E–18 [chr5:82861400]

max P.value: 9.99E–1 [chr5:83129334]

omitted GWAS Hits: chr5:83.260938–Mitochondrial DNA levels, NA

## GWAS Catalog SNPs in Region

| <b>chr</b> | <b>pos (Mb)</b> | <b>trait</b>                      | <b>snp</b> |
|------------|-----------------|-----------------------------------|------------|
| 5          | 82.81912        | Laryngeal squamous cell carcinoma | rs310518   |
| 5          | 82.84549        | Diisocyanate-induced asthma       | rs3852186  |
| 5          | 82.88991        | Major depressive disorder         | rs310501   |
| 5          | 82.96073        | Visceral fat                      | rs3846635  |
| 5          | 82.98574        | Prostate cancer                   | rs4466137  |
| 5          | 83.17359        | Ankylosing spondylitis            | rs4552569  |
| 5          | 83.26094        | Mitochondrial DNA levels          | rs2301070  |

# TBSS\_ICVF\_Posterior\_limb\_of\_internal\_capsule\_L

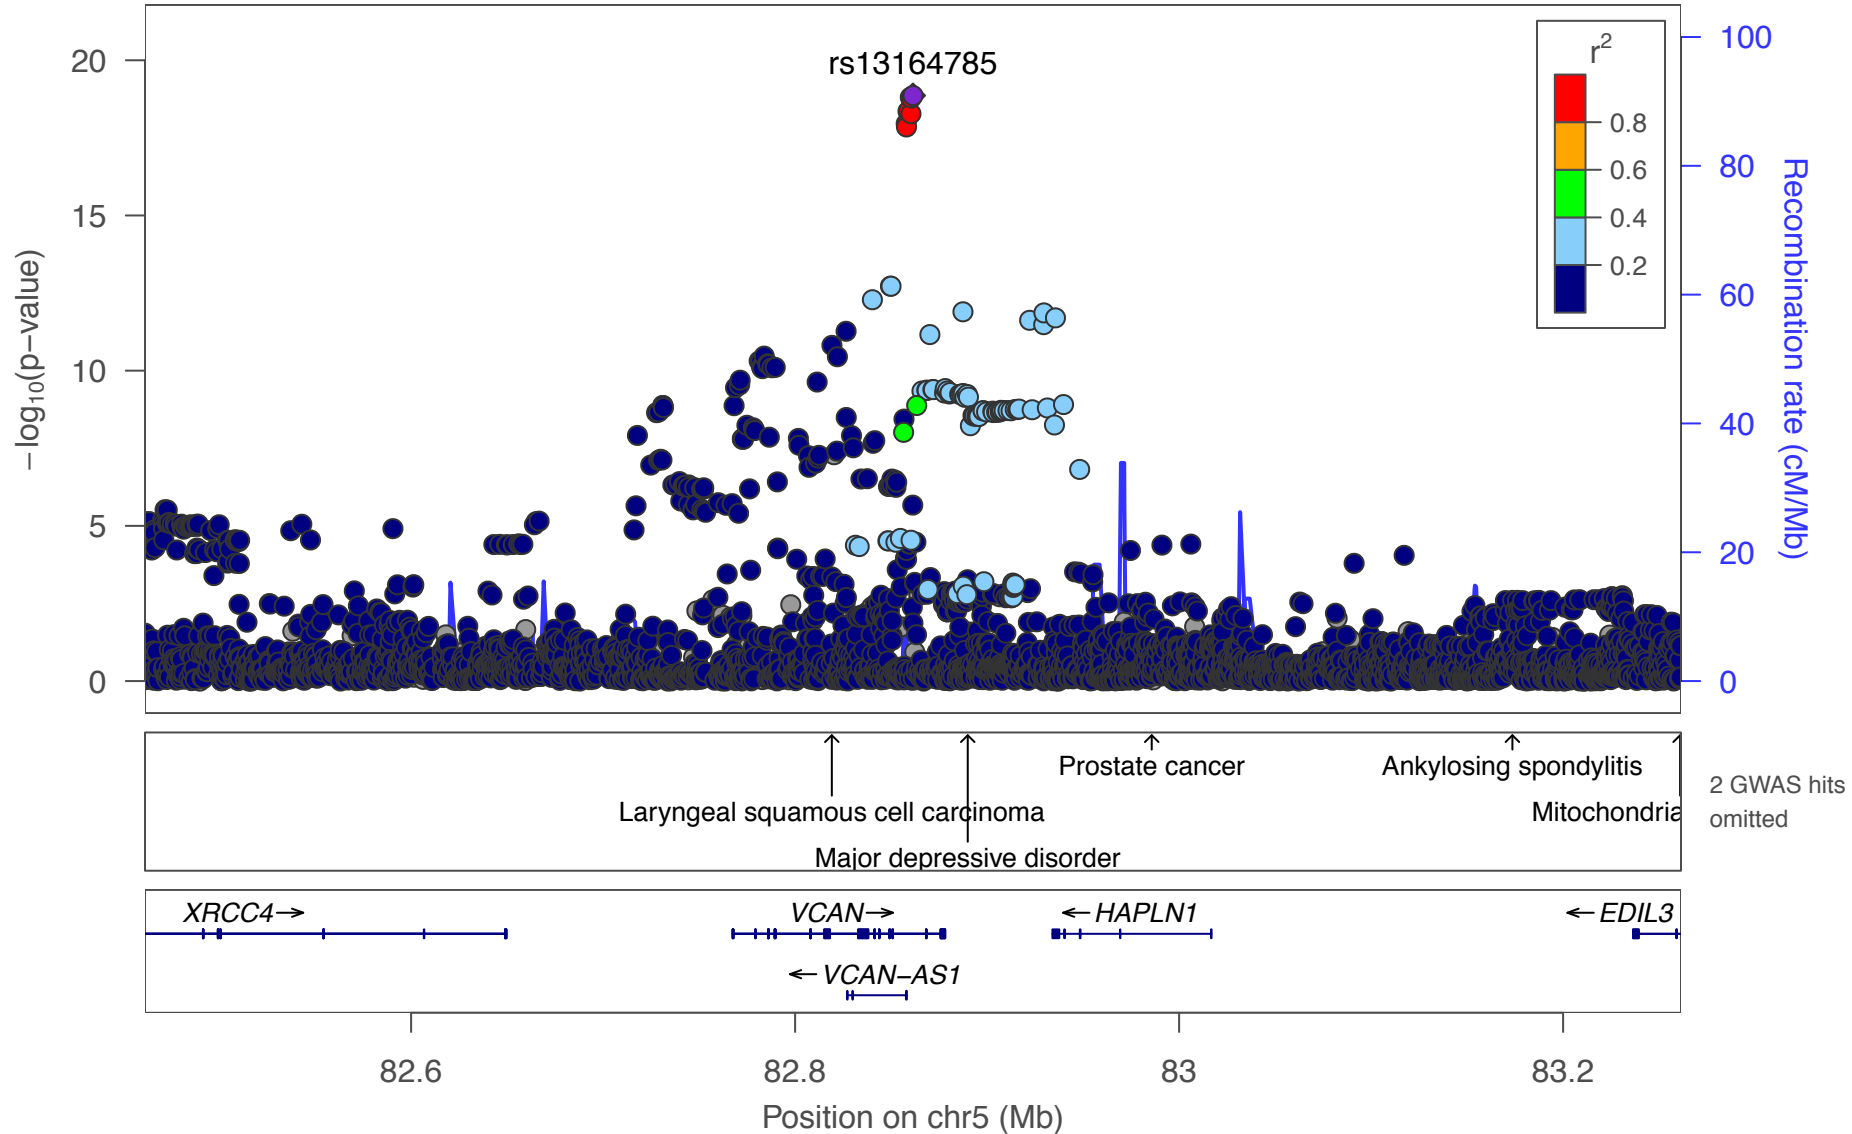

date: Thu Aug 17 17:55:19 2017

build: hg19

display range: chr5:82461400–83261400 [82461400–83261400]

hilite range: 0 – 0 [ 0 – 0 ]

reference SNP: chr5:82861400

number of SNPs plotted: 3396

min P.value: 1.37E–19 [chr5:82861400]

max P.value: 10E–1 [chr5:83098673]

omitted GWAS Hits: chr5:83.260938–Mitochondrial DNA levels, NA

## GWAS Catalog SNPs in Region

| <b>chr</b> | <b>pos (Mb)</b> | <b>trait</b>                      | <b>snp</b> |
|------------|-----------------|-----------------------------------|------------|
| 5          | 82.81912        | Laryngeal squamous cell carcinoma | rs310518   |
| 5          | 82.84549        | Diisocyanate-induced asthma       | rs3852186  |
| 5          | 82.88991        | Major depressive disorder         | rs310501   |
| 5          | 82.96073        | Visceral fat                      | rs3846635  |
| 5          | 82.98574        | Prostate cancer                   | rs4466137  |
| 5          | 83.17359        | Ankylosing spondylitis            | rs4552569  |
| 5          | 83.26094        | Mitochondrial DNA levels          | rs2301070  |



# TBSS\_ICVF\_Retrolenticular\_part\_of\_internal\_capsule\_R

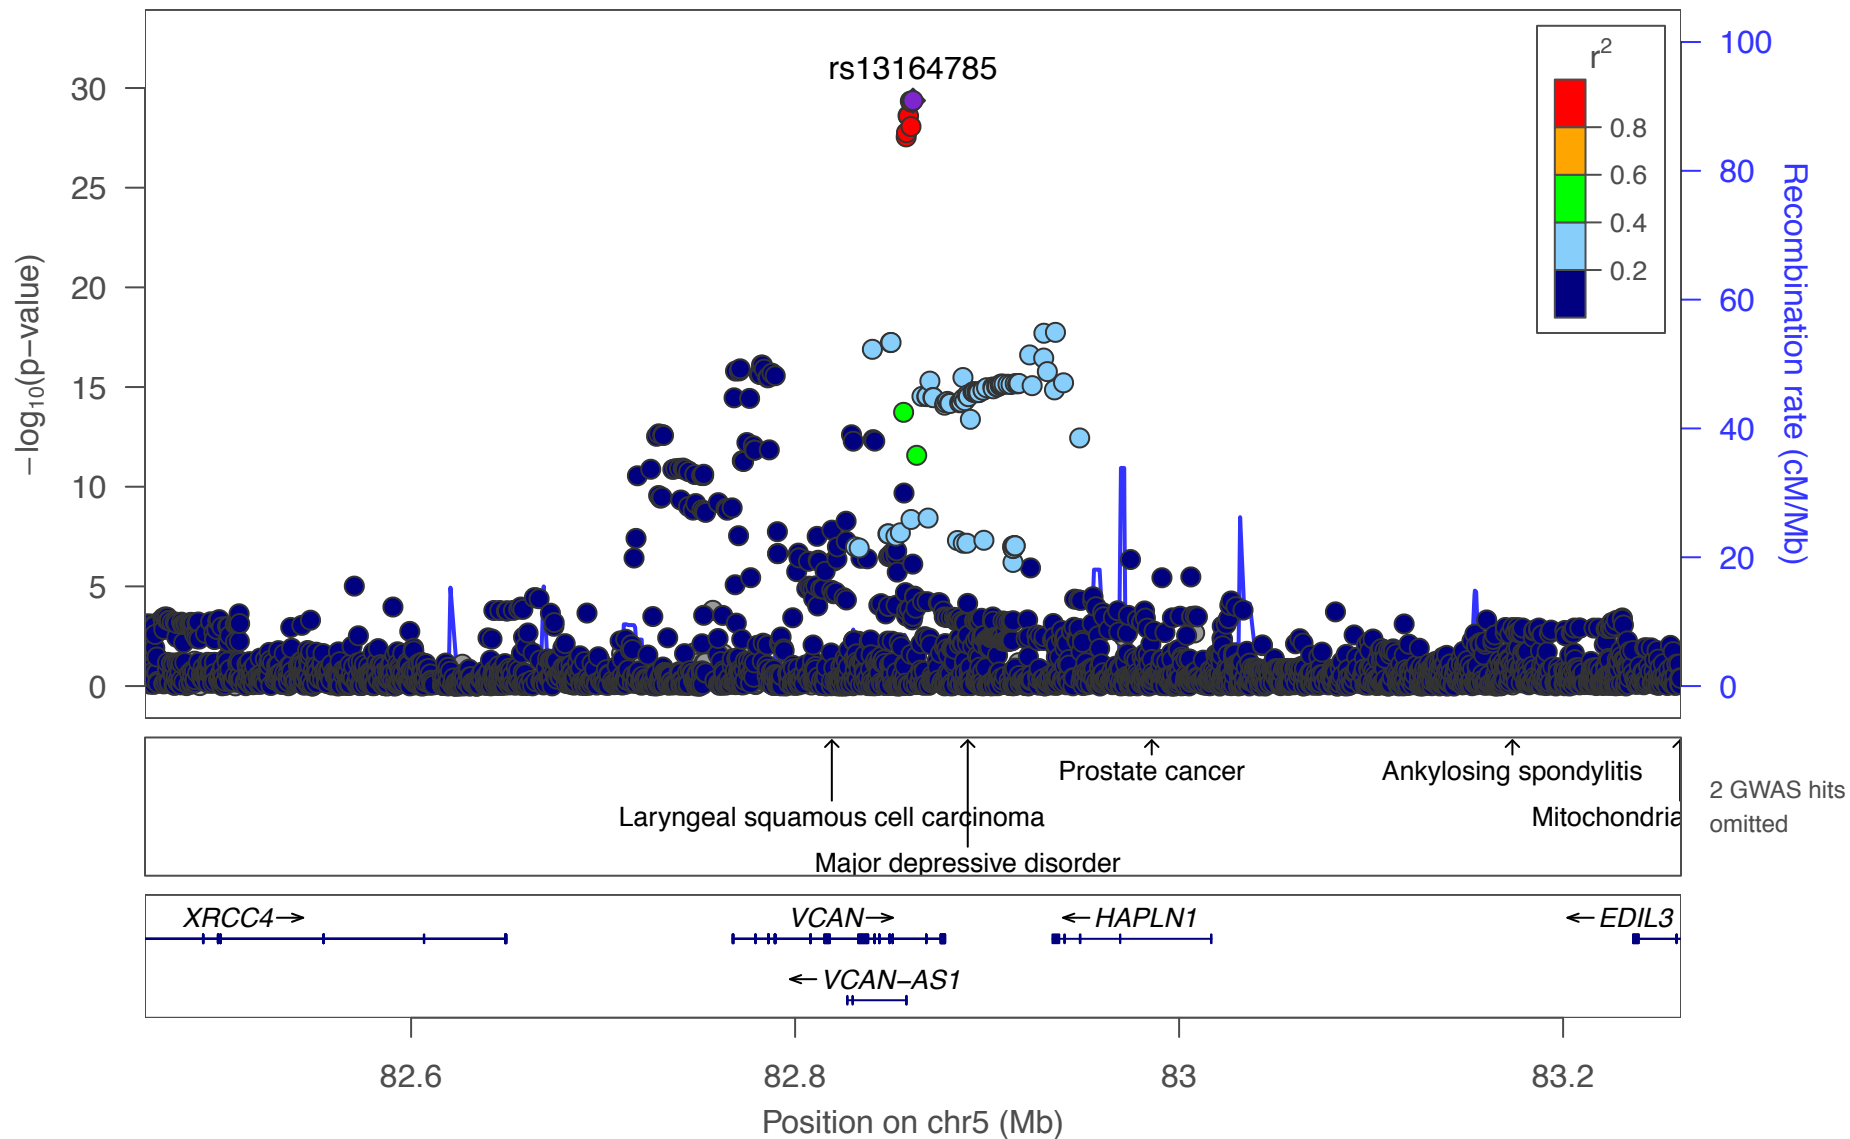

date: Thu Aug 17 17:55:19 2017

build: hg19

display range: chr5:82461400–83261400 [82461400–83261400]

hilite range: 0 – 0 [ 0 – 0 ]

reference SNP: chr5:82861400

number of SNPs plotted: 3396

min P.value: 4.26E–30 [chr5:82861400]

max P.value: 10E–1 [chr5:83082369]

omitted GWAS Hits: chr5:83.260938–Mitochondrial DNA levels, NA

## GWAS Catalog SNPs in Region

| <b>chr</b> | <b>pos (Mb)</b> | <b>trait</b>                      | <b>snp</b> |
|------------|-----------------|-----------------------------------|------------|
| 5          | 82.81912        | Laryngeal squamous cell carcinoma | rs310518   |
| 5          | 82.84549        | Diisocyanate-induced asthma       | rs3852186  |
| 5          | 82.88991        | Major depressive disorder         | rs310501   |
| 5          | 82.96073        | Visceral fat                      | rs3846635  |
| 5          | 82.98574        | Prostate cancer                   | rs4466137  |
| 5          | 83.17359        | Ankylosing spondylitis            | rs4552569  |
| 5          | 83.26094        | Mitochondrial DNA levels          | rs2301070  |

# TBSS\_ICVF\_Retrolenticular\_part\_of\_internal\_capsule\_L

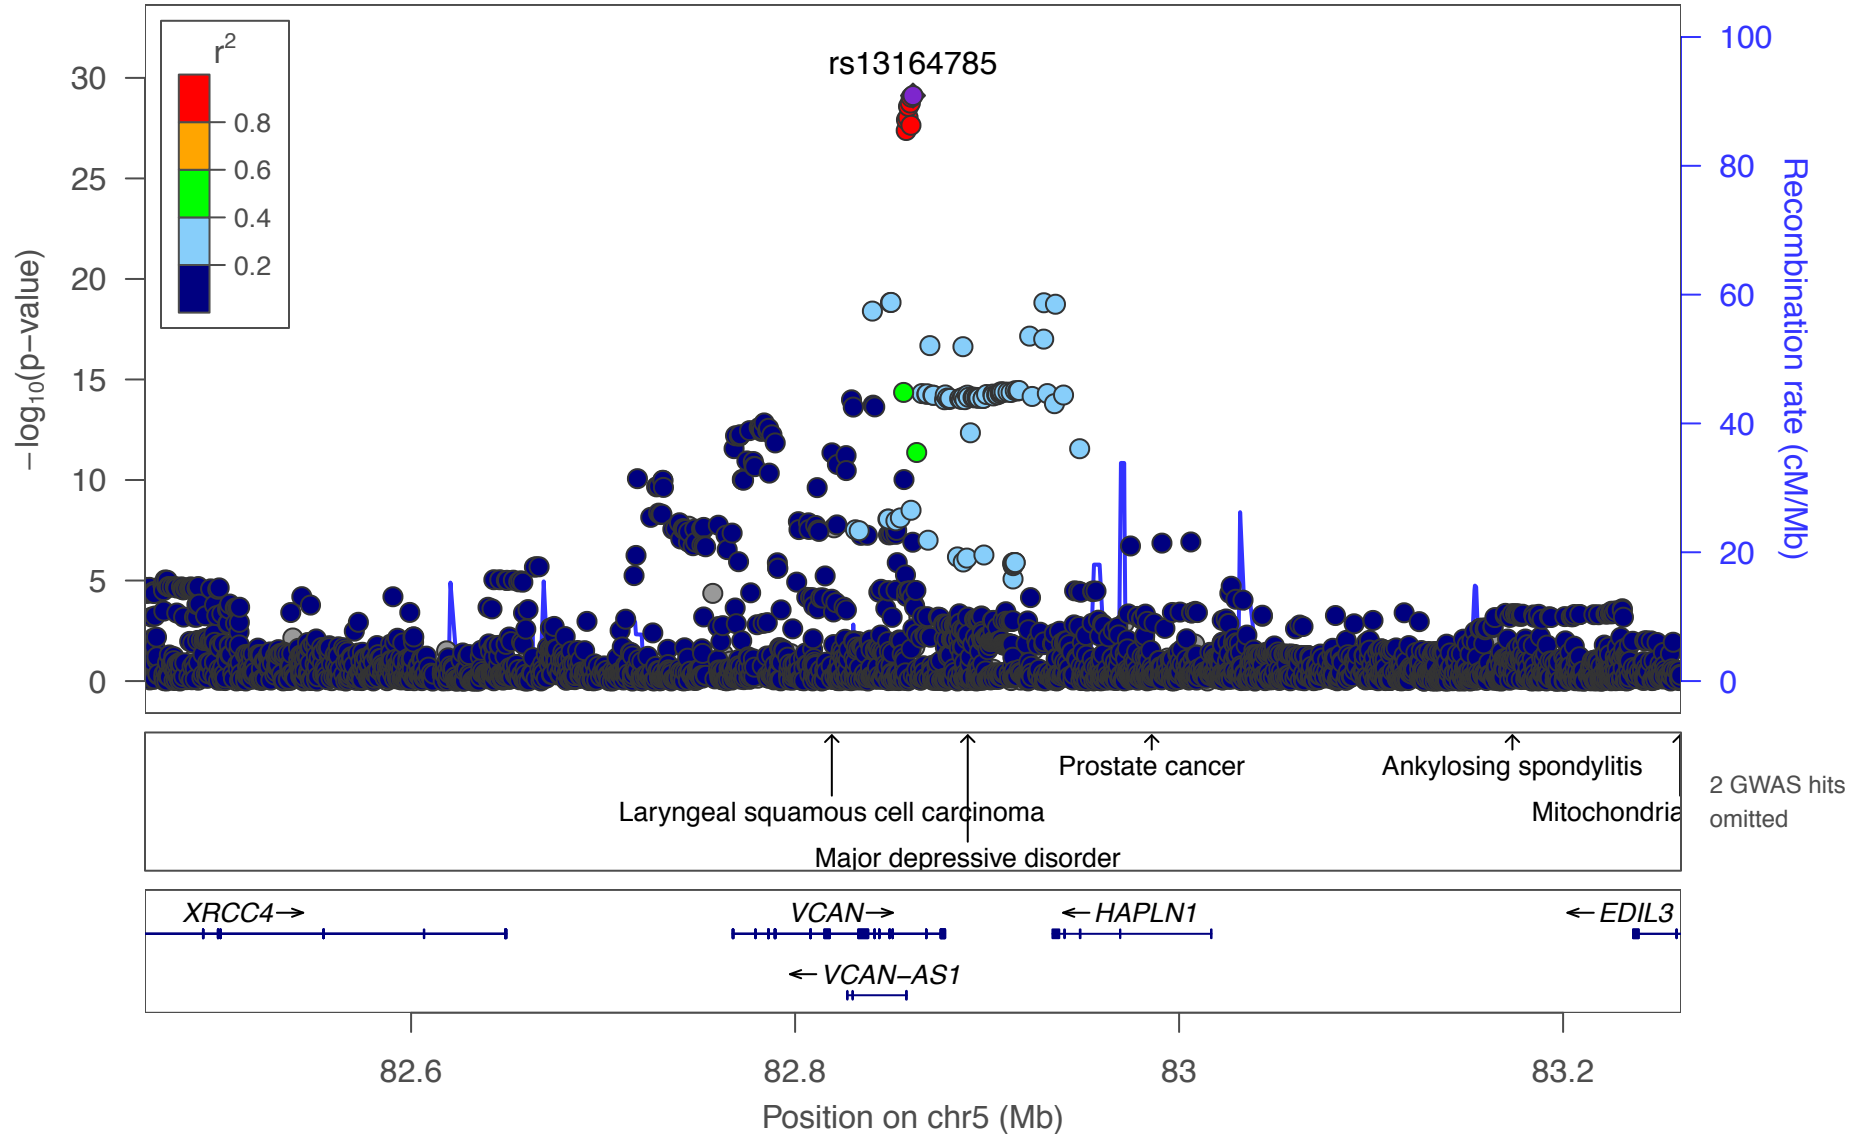

date: Thu Aug 17 17:55:19 2017

build: hg19

display range: chr5:82461400–83261400 [82461400–83261400]

hilite range: 0 – 0 [ 0 – 0 ]

reference SNP: chr5:82861400

number of SNPs plotted: 3396

min P.value: 7.57E–30 [chr5:82861400]

max P.value: 10E–1 [chr5:83127527]

omitted GWAS Hits: chr5:83.260938–Mitochondrial DNA levels, NA

## GWAS Catalog SNPs in Region

| <b>chr</b> | <b>pos (Mb)</b> | <b>trait</b>                      | <b>snp</b> |
|------------|-----------------|-----------------------------------|------------|
| 5          | 82.81912        | Laryngeal squamous cell carcinoma | rs310518   |
| 5          | 82.84549        | Diisocyanate-induced asthma       | rs3852186  |
| 5          | 82.88991        | Major depressive disorder         | rs310501   |
| 5          | 82.96073        | Visceral fat                      | rs3846635  |
| 5          | 82.98574        | Prostate cancer                   | rs4466137  |
| 5          | 83.17359        | Ankylosing spondylitis            | rs4552569  |
| 5          | 83.26094        | Mitochondrial DNA levels          | rs2301070  |

# TBSS\_ICVF\_Anterior\_corona\_radiata\_R

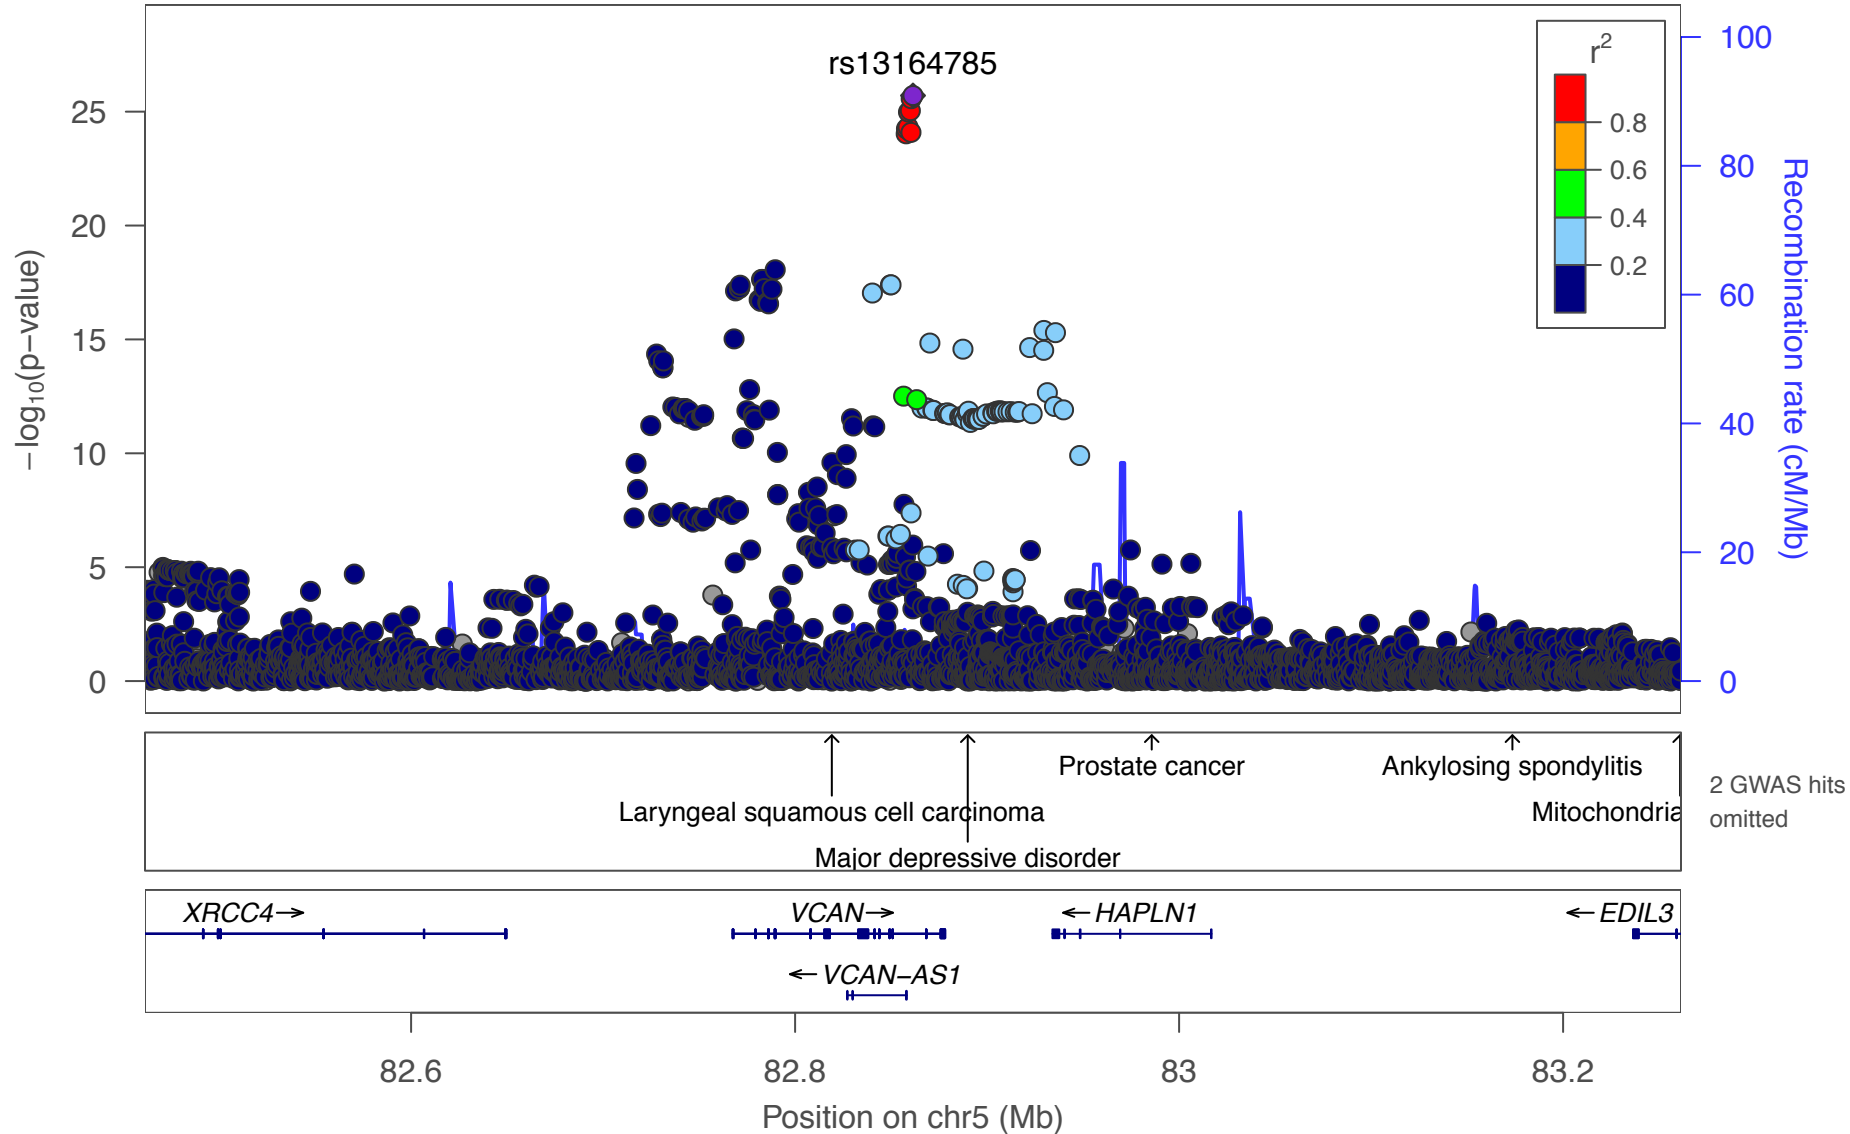

date: Thu Aug 17 17:55:19 2017

build: hg19

display range: chr5:82461400–83261400 [82461400–83261400]

hilite range: 0 – 0 [ 0 – 0 ]

reference SNP: chr5:82861400

number of SNPs plotted: 3396

min P.value: 1.96E–26 [chr5:82861400]

max P.value: 10E–1 [chr5:82586088]

omitted GWAS Hits: chr5:83.260938–Mitochondrial DNA levels, NA



## GWAS Catalog SNPs in Region

| <b>chr</b> | <b>pos (Mb)</b> | <b>trait</b>                      | <b>snp</b> |
|------------|-----------------|-----------------------------------|------------|
| 5          | 82.81912        | Laryngeal squamous cell carcinoma | rs310518   |
| 5          | 82.84549        | Diisocyanate-induced asthma       | rs3852186  |
| 5          | 82.88991        | Major depressive disorder         | rs310501   |
| 5          | 82.96073        | Visceral fat                      | rs3846635  |
| 5          | 82.98574        | Prostate cancer                   | rs4466137  |
| 5          | 83.17359        | Ankylosing spondylitis            | rs4552569  |
| 5          | 83.26094        | Mitochondrial DNA levels          | rs2301070  |

# TBSS\_ICVF\_Anterior\_corona\_radiata\_L

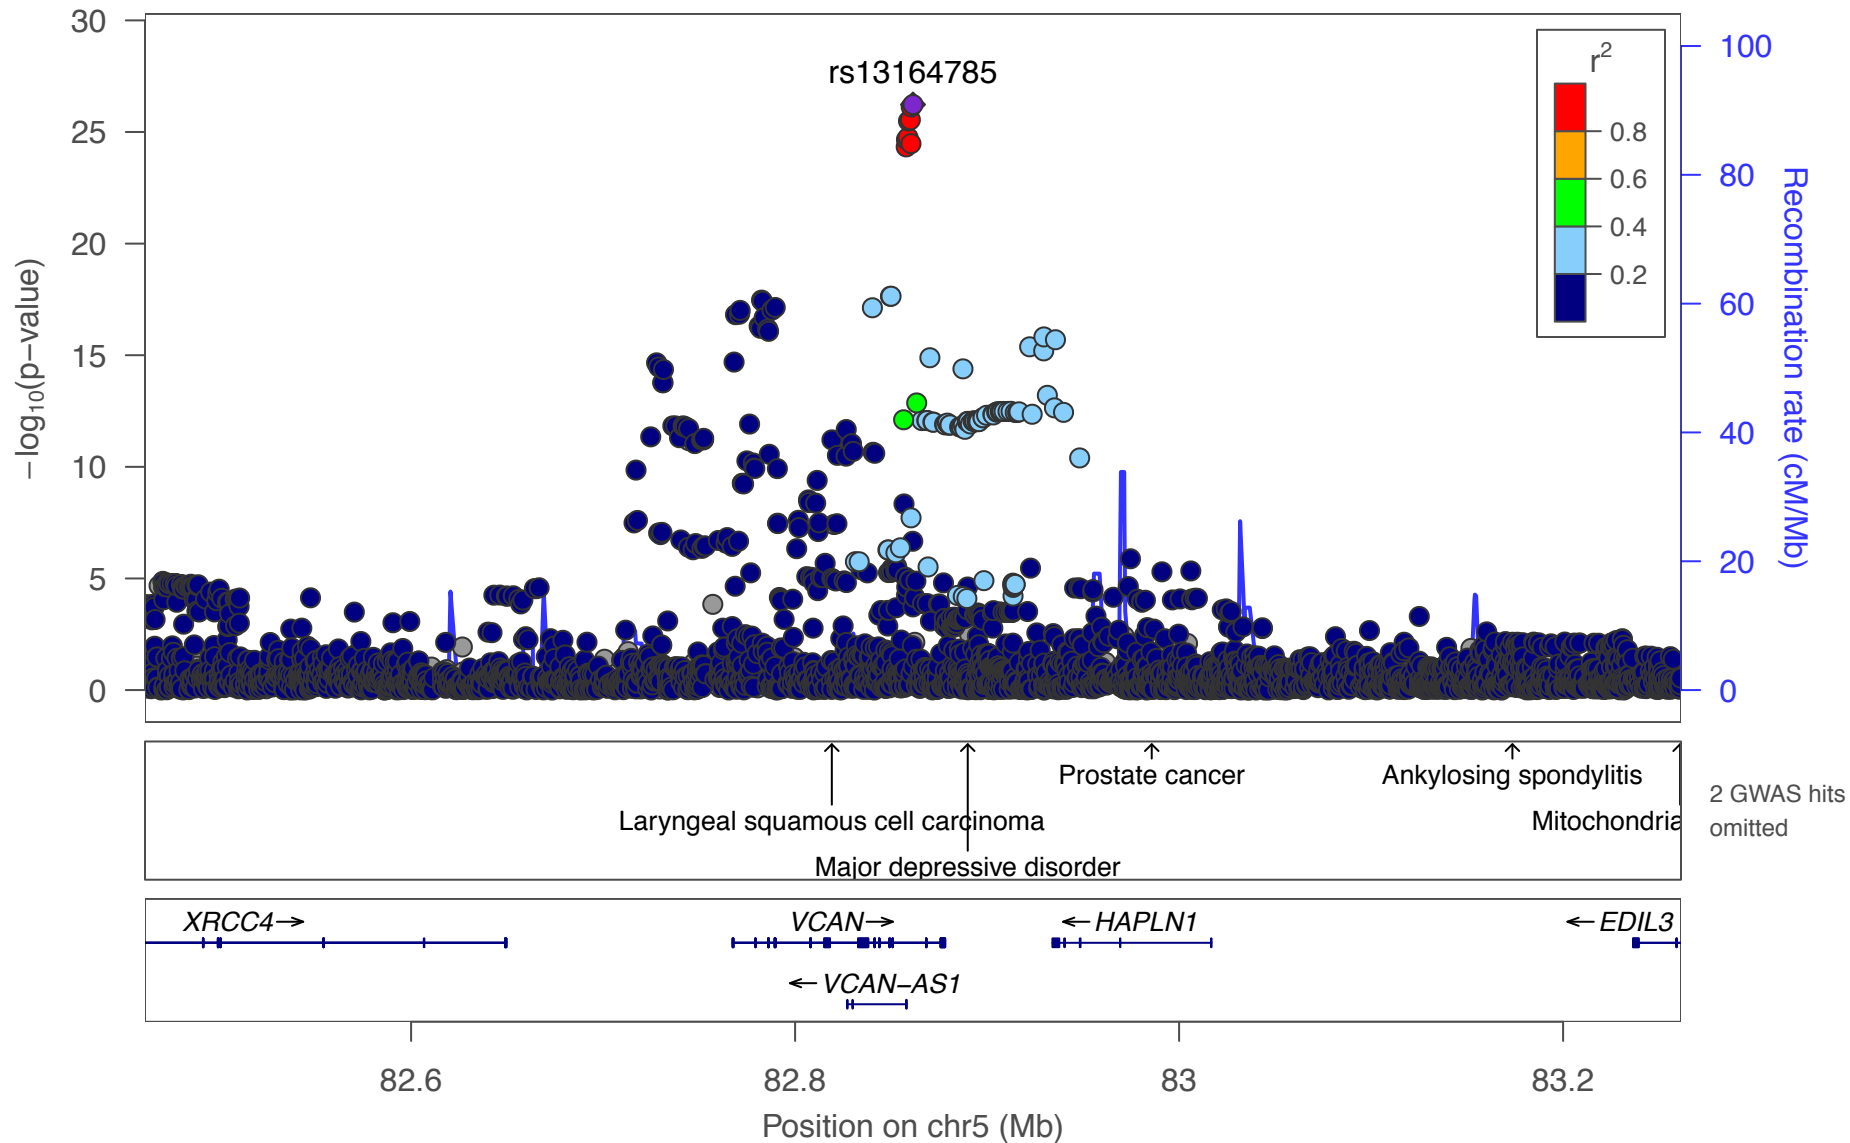

date: Thu Aug 17 17:55:19 2017

build: hg19

display range: chr5:82461400–83261400 [82461400–83261400]

hilite range: 0 – 0 [ 0 – 0 ]

reference SNP: chr5:82861400

number of SNPs plotted: 3396

min P.value: 5.9E–27 [chr5:82861400]

max P.value: 9.99E–1 [chr5:82929723]

omitted GWAS Hits: chr5:83.260938–Mitochondrial DNA levels, NA

## GWAS Catalog SNPs in Region

| <b>chr</b> | <b>pos (Mb)</b> | <b>trait</b>                      | <b>snp</b> |
|------------|-----------------|-----------------------------------|------------|
| 5          | 82.81912        | Laryngeal squamous cell carcinoma | rs310518   |
| 5          | 82.84549        | Diisocyanate-induced asthma       | rs3852186  |
| 5          | 82.88991        | Major depressive disorder         | rs310501   |
| 5          | 82.96073        | Visceral fat                      | rs3846635  |
| 5          | 82.98574        | Prostate cancer                   | rs4466137  |
| 5          | 83.17359        | Ankylosing spondylitis            | rs4552569  |
| 5          | 83.26094        | Mitochondrial DNA levels          | rs2301070  |

# TBSS\_ICVF\_Superior\_corona\_radiata\_R

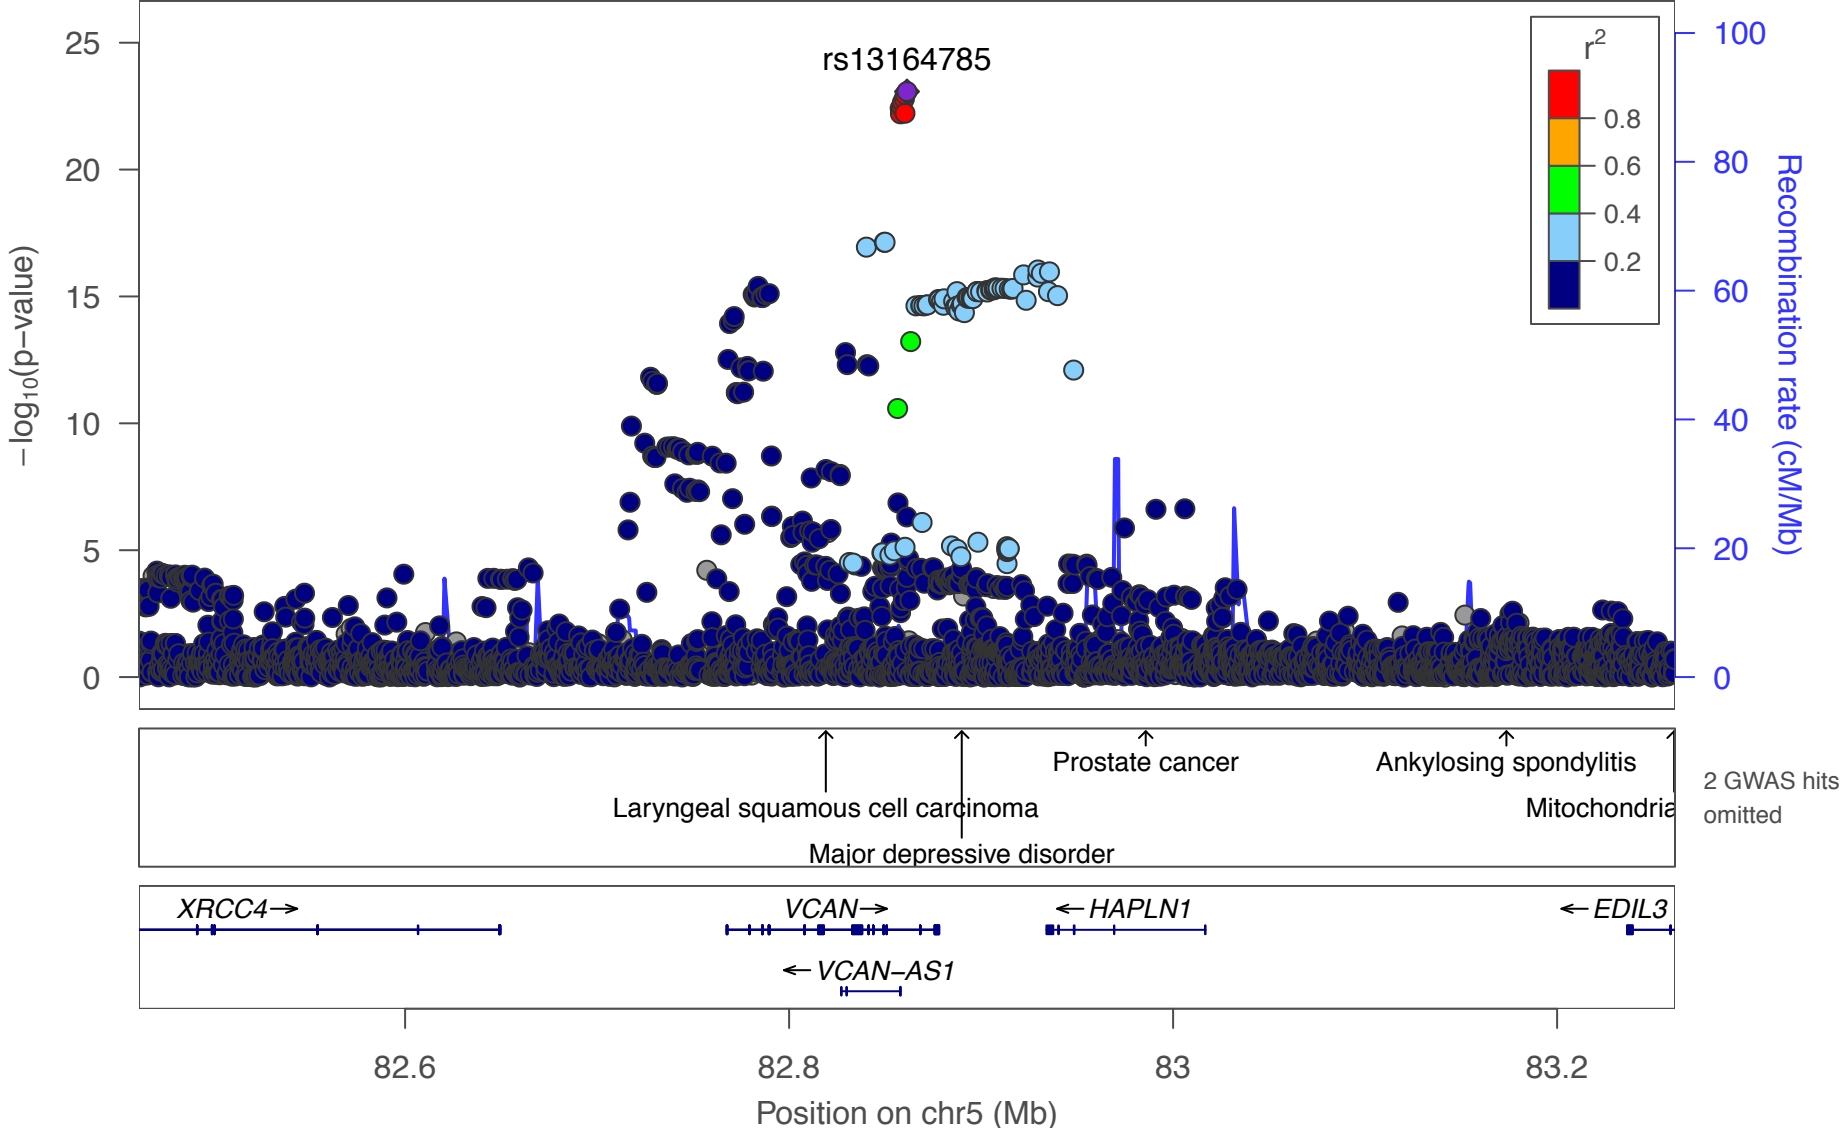

date: Thu Aug 17 17:55:19 2017

build: hg19

display range: chr5:82461400–83261400 [82461400–83261400]

hilite range: 0 – 0 [ 0 – 0 ]

reference SNP: chr5:82861400

number of SNPs plotted: 3396

min P.value: 8.41E–24 [chr5:82861400]

max P.value: 9.97E–1 [chr5:82659709]

omitted GWAS Hits: chr5:83.260938–Mitochondrial DNA levels, NA

## GWAS Catalog SNPs in Region

| <b>chr</b> | <b>pos (Mb)</b> | <b>trait</b>                      | <b>snp</b> |
|------------|-----------------|-----------------------------------|------------|
| 5          | 82.81912        | Laryngeal squamous cell carcinoma | rs310518   |
| 5          | 82.84549        | Diisocyanate-induced asthma       | rs3852186  |
| 5          | 82.88991        | Major depressive disorder         | rs310501   |
| 5          | 82.96073        | Visceral fat                      | rs3846635  |
| 5          | 82.98574        | Prostate cancer                   | rs4466137  |
| 5          | 83.17359        | Ankylosing spondylitis            | rs4552569  |
| 5          | 83.26094        | Mitochondrial DNA levels          | rs2301070  |

# TBSS\_ICVF\_Superior\_corona\_radiata\_L

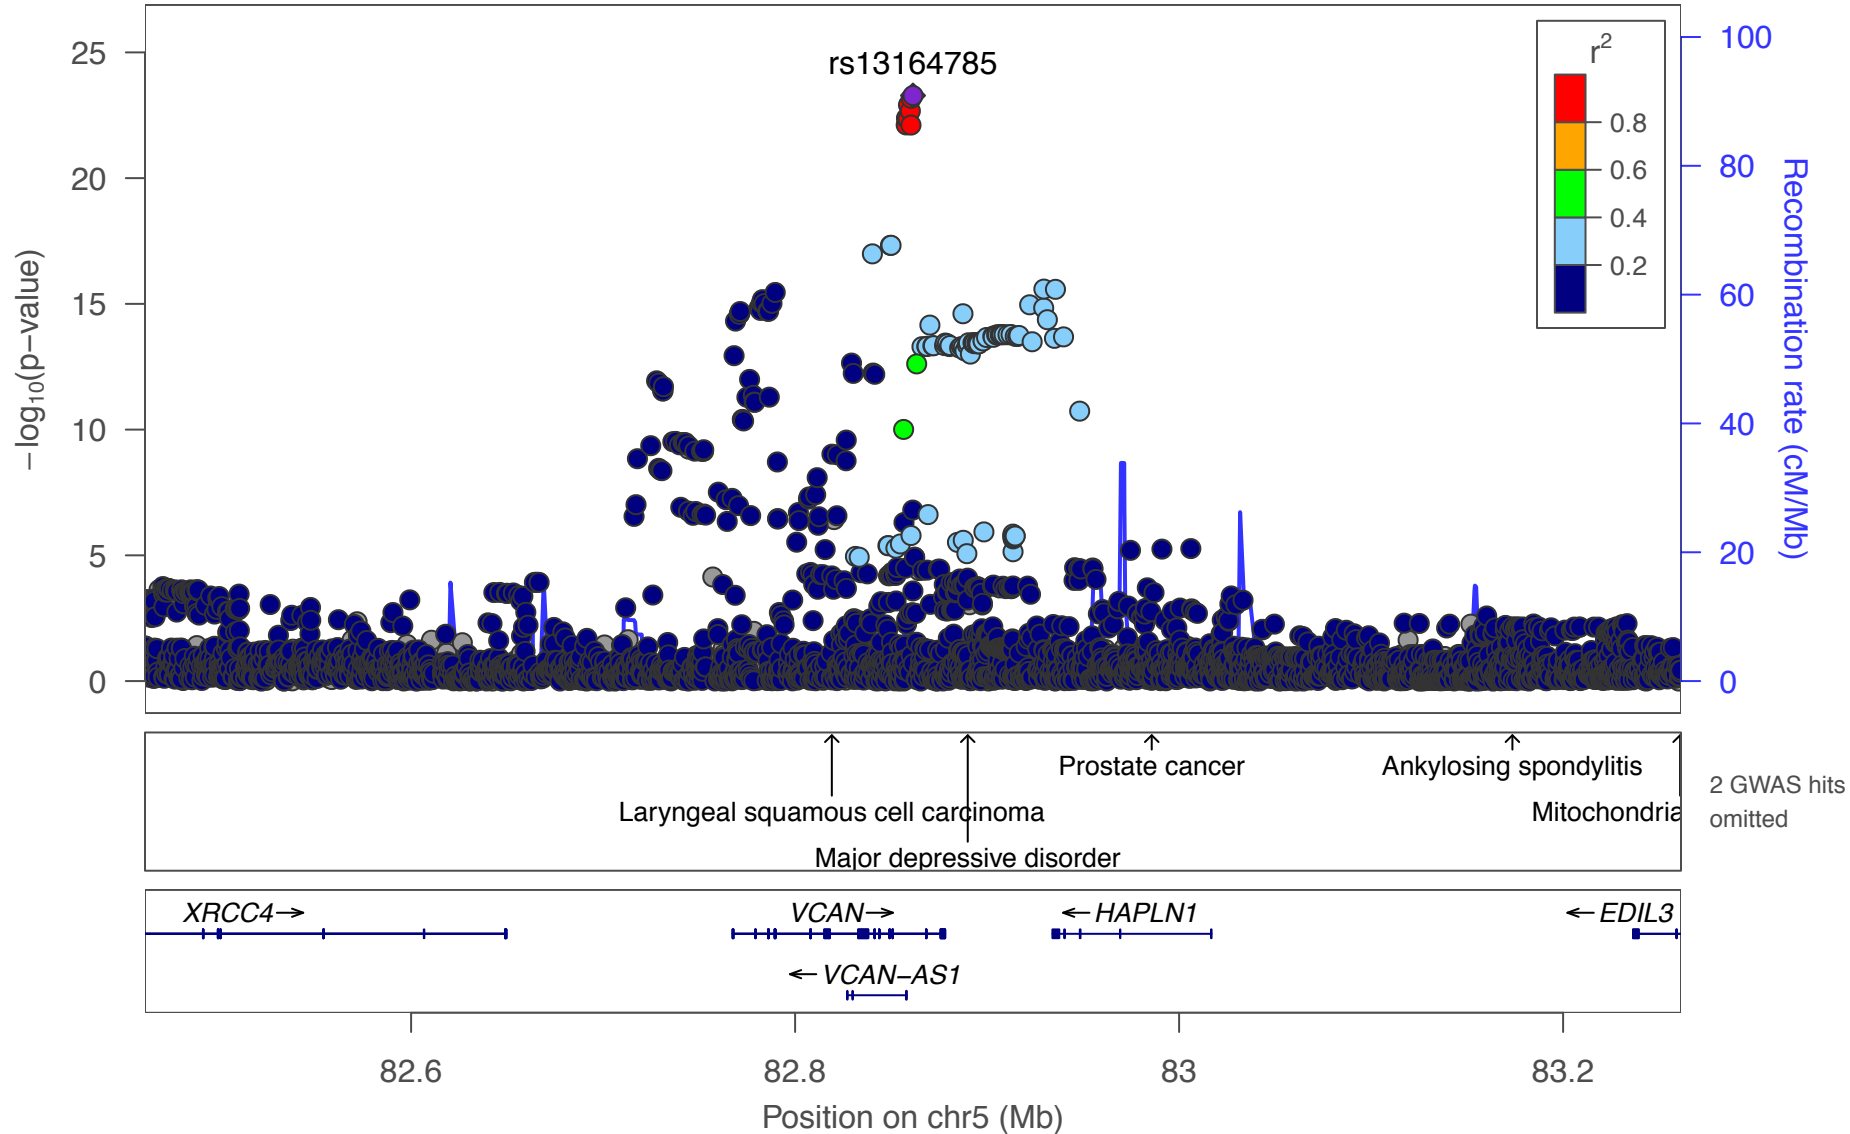



date: Thu Aug 17 17:55:19 2017

build: hg19

display range: chr5:82461400–83261400 [82461400–83261400]

hilite range: 0 – 0 [ 0 – 0 ]

reference SNP: chr5:82861400

number of SNPs plotted: 3396

min P.value: 5.2E–24 [chr5:82861400]

max P.value: 10E–1 [chr5:82630687]

omitted GWAS Hits: chr5:83.260938–Mitochondrial DNA levels, NA

## GWAS Catalog SNPs in Region

| <b>chr</b> | <b>pos (Mb)</b> | <b>trait</b>                      | <b>snp</b> |
|------------|-----------------|-----------------------------------|------------|
| 5          | 82.81912        | Laryngeal squamous cell carcinoma | rs310518   |
| 5          | 82.84549        | Diisocyanate-induced asthma       | rs3852186  |
| 5          | 82.88991        | Major depressive disorder         | rs310501   |
| 5          | 82.96073        | Visceral fat                      | rs3846635  |
| 5          | 82.98574        | Prostate cancer                   | rs4466137  |
| 5          | 83.17359        | Ankylosing spondylitis            | rs4552569  |
| 5          | 83.26094        | Mitochondrial DNA levels          | rs2301070  |

# TBSS\_ICVF\_Posterior\_corona\_radiata\_R

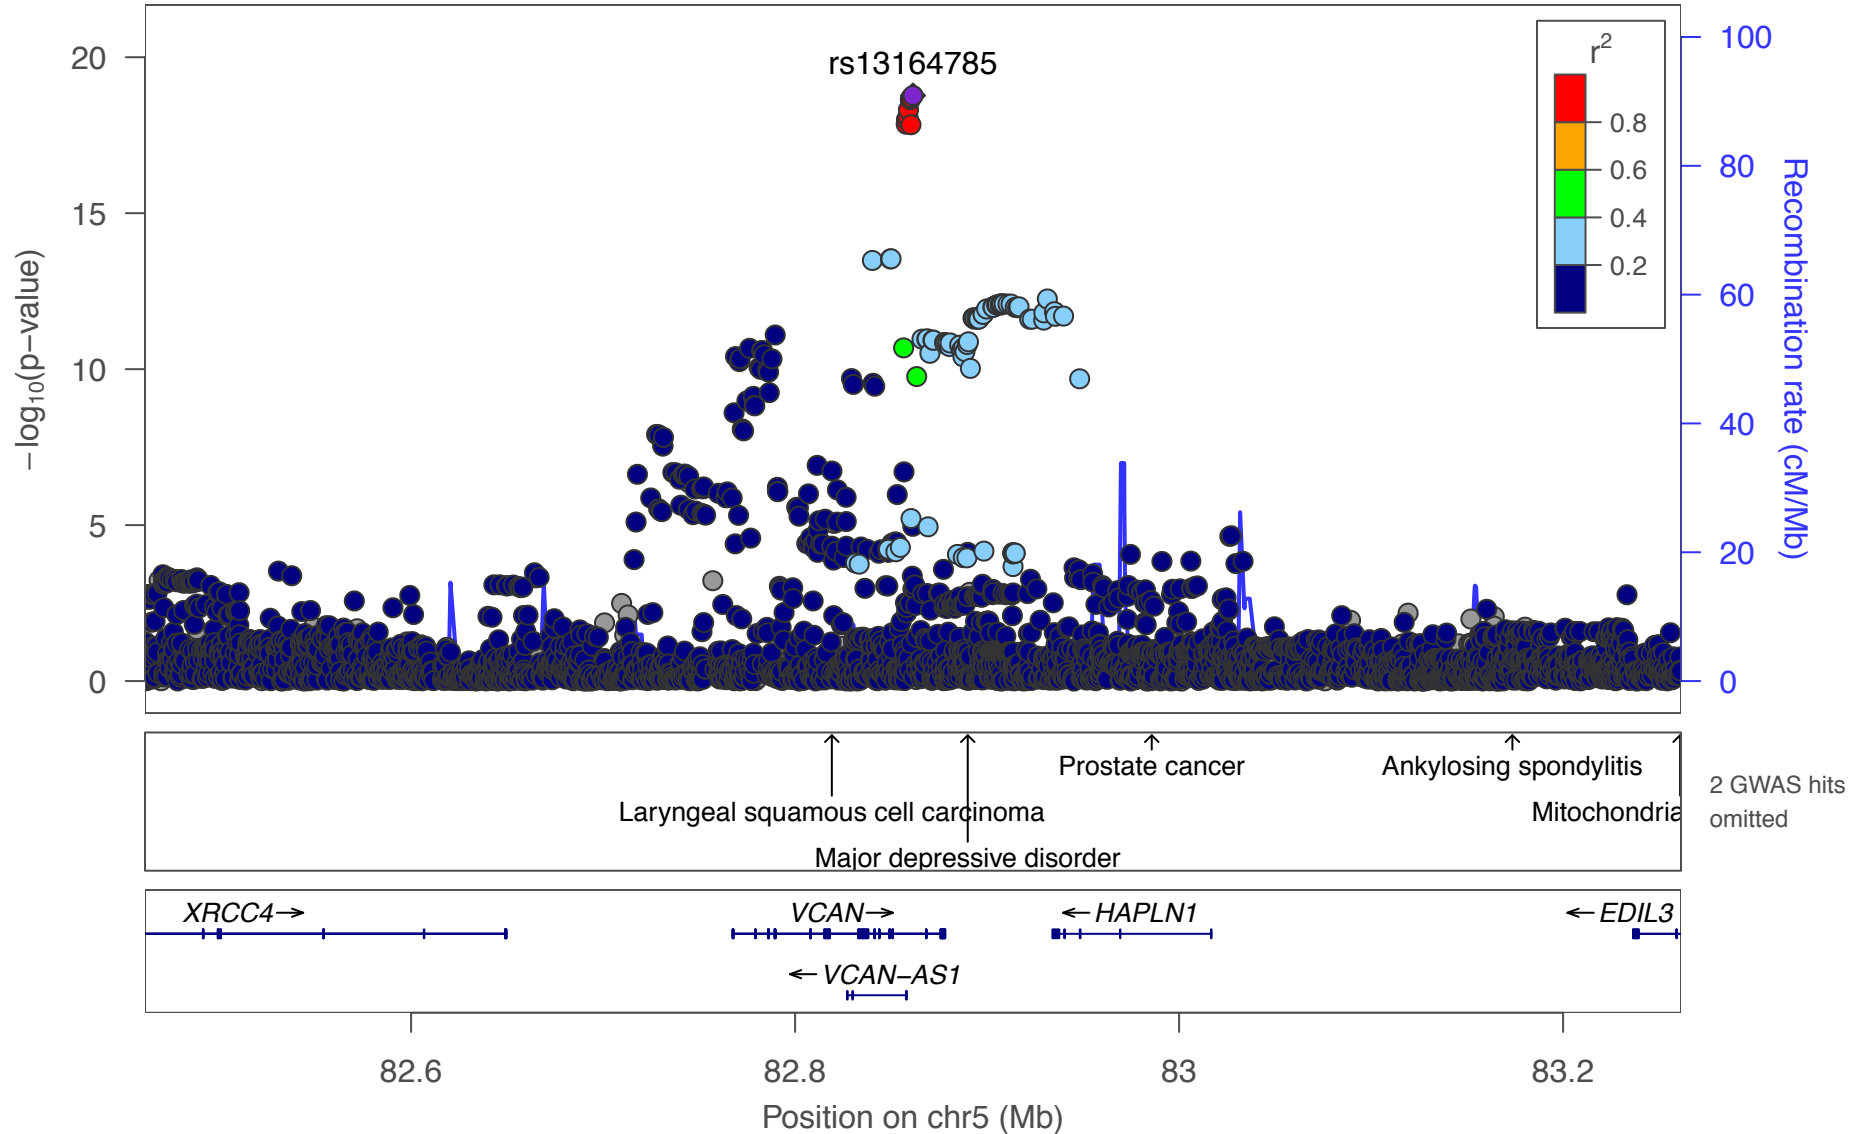

date: Thu Aug 17 17:55:19 2017

build: hg19

display range: chr5:82461400–83261400 [82461400–83261400]

hilite range: 0 – 0 [ 0 – 0 ]

reference SNP: chr5:82861400

number of SNPs plotted: 3396

min P.value: 1.69E–19 [chr5:82861400]

max P.value: 10E–1 [chr5:82907433]

omitted GWAS Hits: chr5:83.260938–Mitochondrial DNA levels, NA

## GWAS Catalog SNPs in Region

| <b>chr</b> | <b>pos (Mb)</b> | <b>trait</b>                      | <b>snp</b> |
|------------|-----------------|-----------------------------------|------------|
| 5          | 82.81912        | Laryngeal squamous cell carcinoma | rs310518   |
| 5          | 82.84549        | Diisocyanate-induced asthma       | rs3852186  |
| 5          | 82.88991        | Major depressive disorder         | rs310501   |
| 5          | 82.96073        | Visceral fat                      | rs3846635  |
| 5          | 82.98574        | Prostate cancer                   | rs4466137  |
| 5          | 83.17359        | Ankylosing spondylitis            | rs4552569  |
| 5          | 83.26094        | Mitochondrial DNA levels          | rs2301070  |

# TBSS\_ICVF\_Posterior\_corona\_radiata\_L

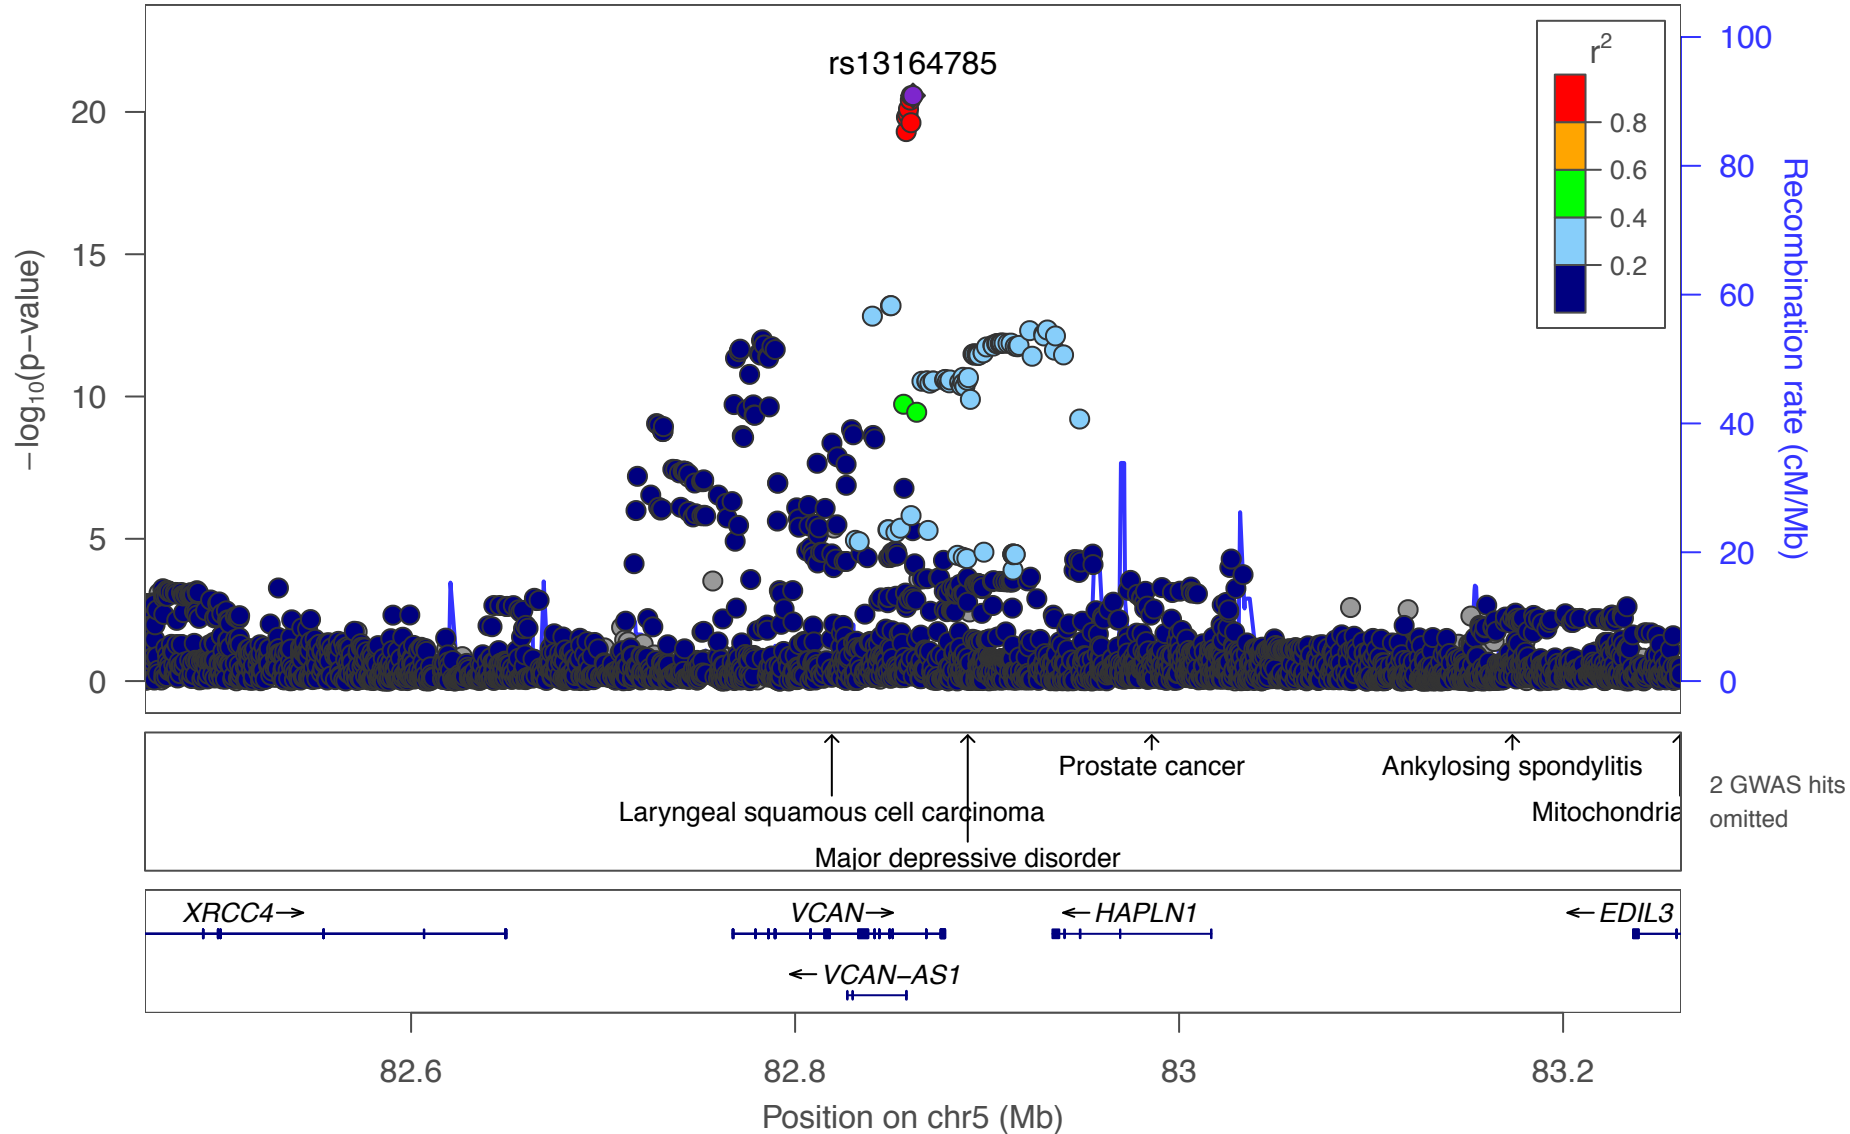

date: Thu Aug 17 17:55:19 2017

build: hg19

display range: chr5:82461400–83261400 [82461400–83261400]

hilite range: 0 – 0 [ 0 – 0 ]

reference SNP: chr5:82861400

number of SNPs plotted: 3396

min P.value: 2.65E–21 [chr5:82861400]

max P.value: 10E–1 [chr5:82587485]

omitted GWAS Hits: chr5:83.260938–Mitochondrial DNA levels, NA

## GWAS Catalog SNPs in Region

| <b>chr</b> | <b>pos (Mb)</b> | <b>trait</b>                      | <b>snp</b> |
|------------|-----------------|-----------------------------------|------------|
| 5          | 82.81912        | Laryngeal squamous cell carcinoma | rs310518   |
| 5          | 82.84549        | Diisocyanate-induced asthma       | rs3852186  |
| 5          | 82.88991        | Major depressive disorder         | rs310501   |
| 5          | 82.96073        | Visceral fat                      | rs3846635  |
| 5          | 82.98574        | Prostate cancer                   | rs4466137  |
| 5          | 83.17359        | Ankylosing spondylitis            | rs4552569  |
| 5          | 83.26094        | Mitochondrial DNA levels          | rs2301070  |



# TBSS\_ICVF\_Sagittal\_stratum\_L

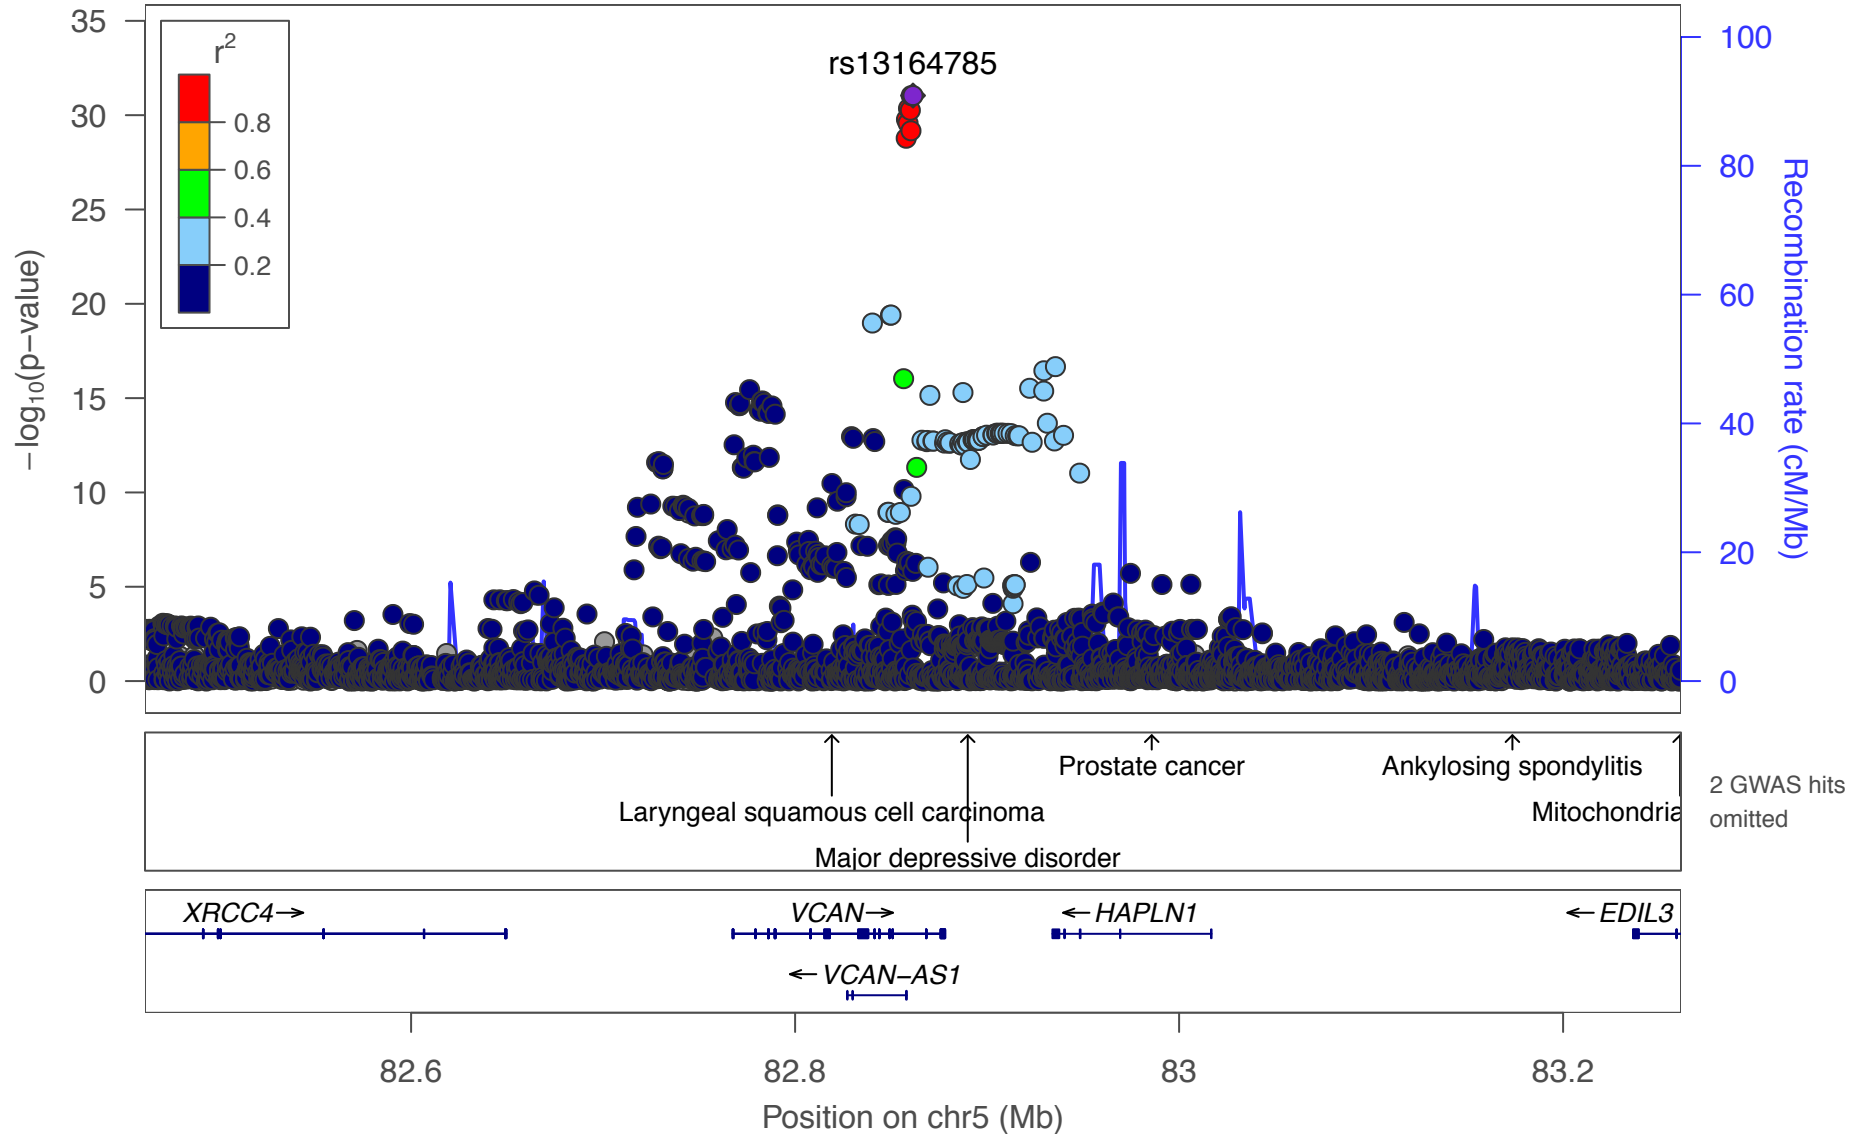

date: Thu Aug 17 17:55:19 2017

build: hg19

display range: chr5:82461400–83261400 [82461400–83261400]

hilite range: 0 – 0 [ 0 – 0 ]

reference SNP: chr5:82861400

number of SNPs plotted: 3396

min P.value: 9.12E–32 [chr5:82861400]

max P.value: 10E–1 [chr5:83203721]

omitted GWAS Hits: chr5:83.260938–Mitochondrial DNA levels, NA

## GWAS Catalog SNPs in Region

| <b>chr</b> | <b>pos (Mb)</b> | <b>trait</b>                      | <b>snp</b> |
|------------|-----------------|-----------------------------------|------------|
| 5          | 82.81912        | Laryngeal squamous cell carcinoma | rs310518   |
| 5          | 82.84549        | Diisocyanate-induced asthma       | rs3852186  |
| 5          | 82.88991        | Major depressive disorder         | rs310501   |
| 5          | 82.96073        | Visceral fat                      | rs3846635  |
| 5          | 82.98574        | Prostate cancer                   | rs4466137  |
| 5          | 83.17359        | Ankylosing spondylitis            | rs4552569  |
| 5          | 83.26094        | Mitochondrial DNA levels          | rs2301070  |

# TBSS\_ICVF\_External\_capsule\_R

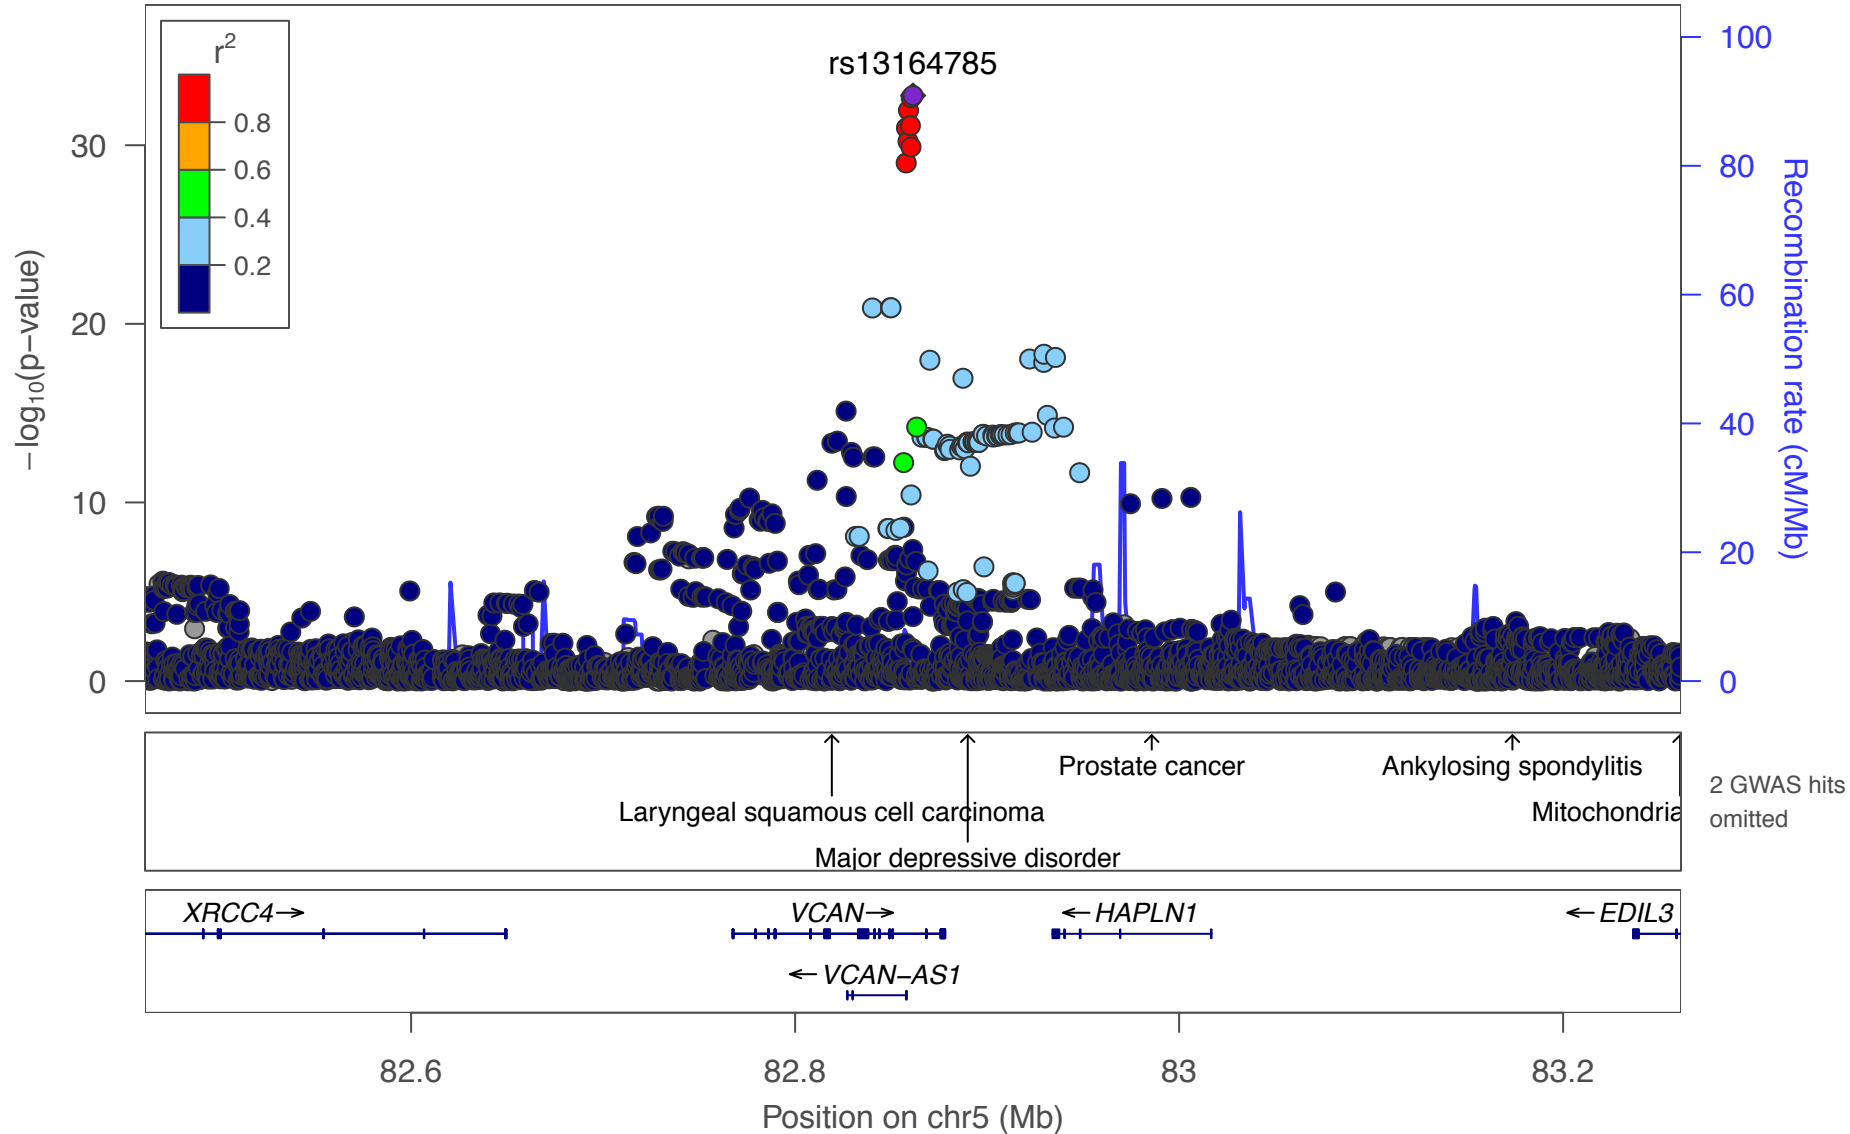

date: Thu Aug 17 17:55:19 2017

build: hg19

display range: chr5:82461400–83261400 [82461400–83261400]

hilite range: 0 – 0 [ 0 – 0 ]

reference SNP: chr5:82861400

number of SNPs plotted: 3396

min P.value: 1.66E–33 [chr5:82861400]

max P.value: 10E–1 [chr5:83006443]

omitted GWAS Hits: chr5:83.260938–Mitochondrial DNA levels, NA

## GWAS Catalog SNPs in Region

| <b>chr</b> | <b>pos (Mb)</b> | <b>trait</b>                      | <b>snp</b> |
|------------|-----------------|-----------------------------------|------------|
| 5          | 82.81912        | Laryngeal squamous cell carcinoma | rs310518   |
| 5          | 82.84549        | Diisocyanate-induced asthma       | rs3852186  |
| 5          | 82.88991        | Major depressive disorder         | rs310501   |
| 5          | 82.96073        | Visceral fat                      | rs3846635  |
| 5          | 82.98574        | Prostate cancer                   | rs4466137  |
| 5          | 83.17359        | Ankylosing spondylitis            | rs4552569  |
| 5          | 83.26094        | Mitochondrial DNA levels          | rs2301070  |

# TBSS\_ICVF\_External\_capsule\_L

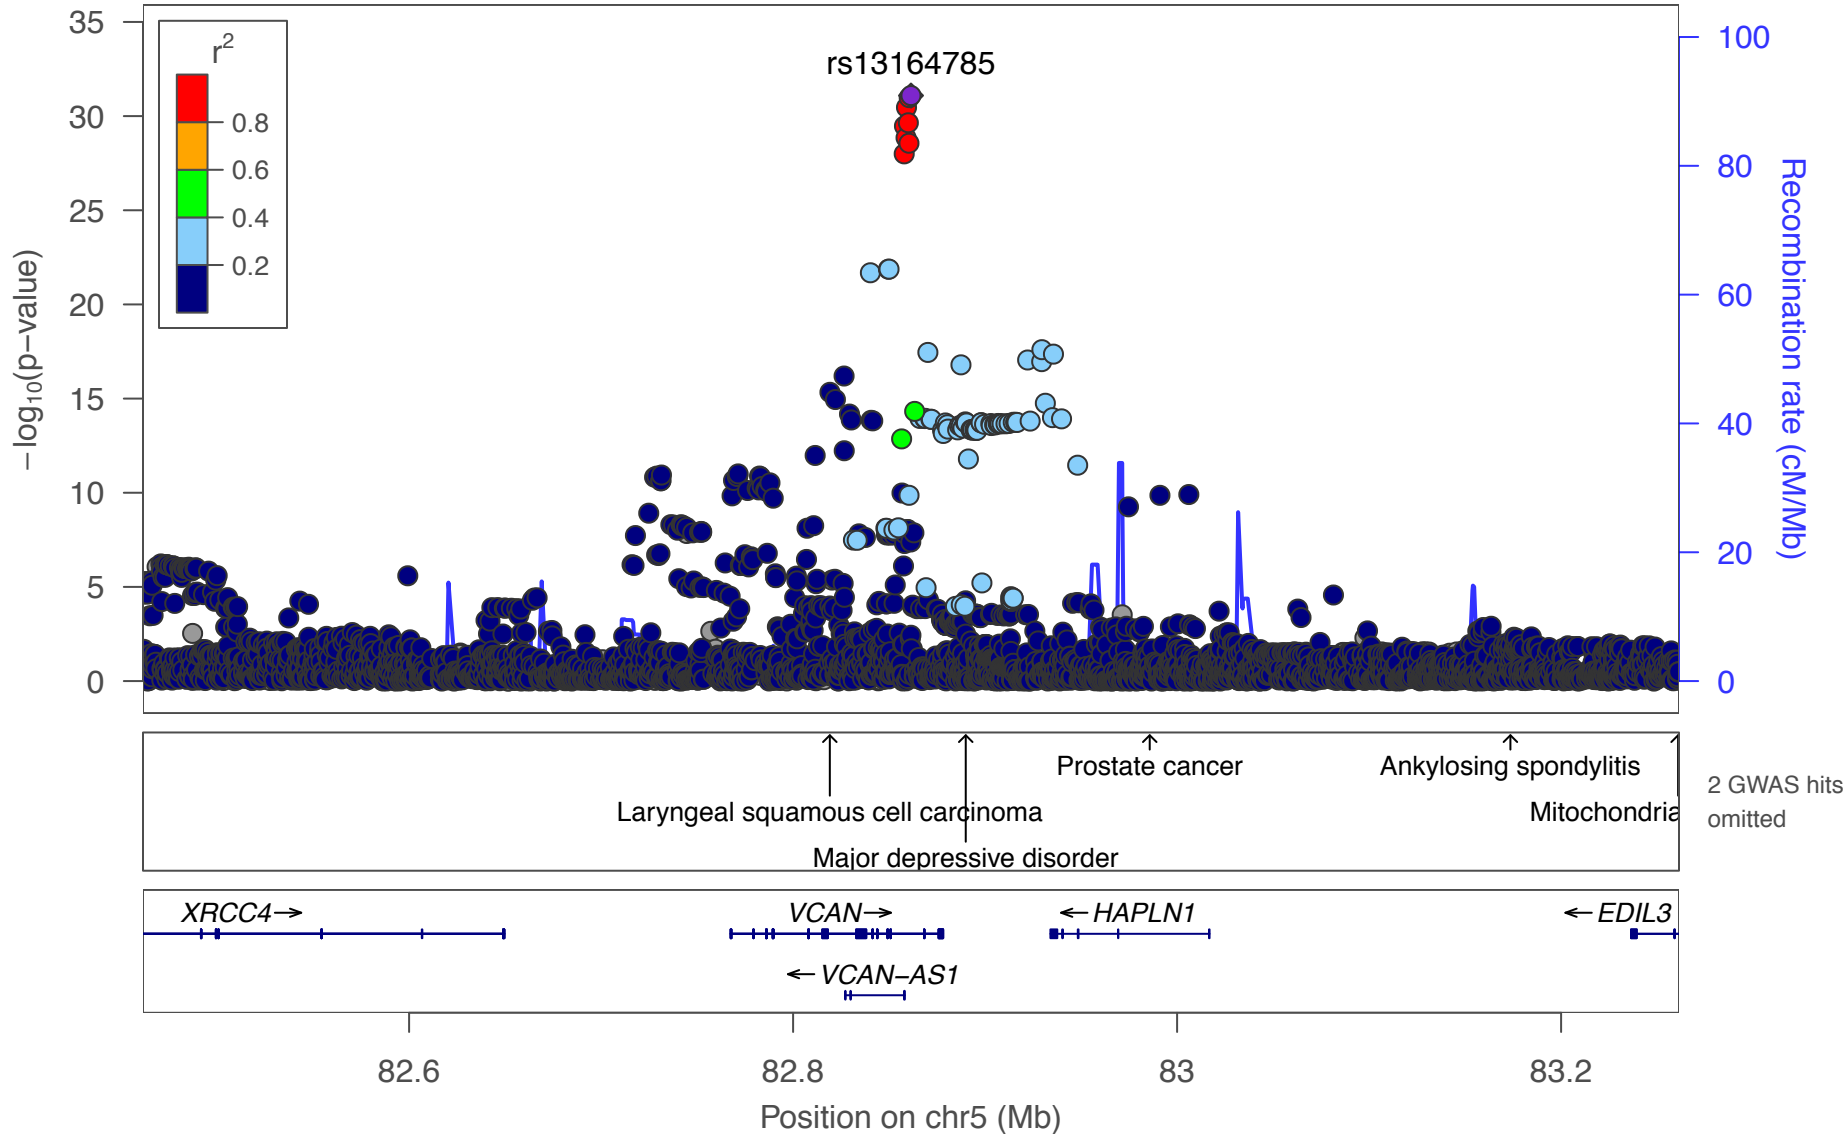

date: Thu Aug 17 17:55:19 2017

build: hg19

display range: chr5:82461400–83261400 [82461400–83261400]

hilite range: 0 – 0 [ 0 – 0 ]

reference SNP: chr5:82861400

number of SNPs plotted: 3396

min P.value:  $8.11E-32$  [chr5:82861400]

max P.value:  $10E-1$  [chr5:83248345]

omitted GWAS Hits: chr5:83.260938–Mitochondrial DNA levels, NA



## GWAS Catalog SNPs in Region

| <b>chr</b> | <b>pos (Mb)</b> | <b>trait</b>                      | <b>snp</b> |
|------------|-----------------|-----------------------------------|------------|
| 5          | 82.81912        | Laryngeal squamous cell carcinoma | rs310518   |
| 5          | 82.84549        | Diisocyanate-induced asthma       | rs3852186  |
| 5          | 82.88991        | Major depressive disorder         | rs310501   |
| 5          | 82.96073        | Visceral fat                      | rs3846635  |
| 5          | 82.98574        | Prostate cancer                   | rs4466137  |
| 5          | 83.17359        | Ankylosing spondylitis            | rs4552569  |
| 5          | 83.26094        | Mitochondrial DNA levels          | rs2301070  |

# TBSS\_ICVF\_Cingulum\_cingulate\_gyrus\_R

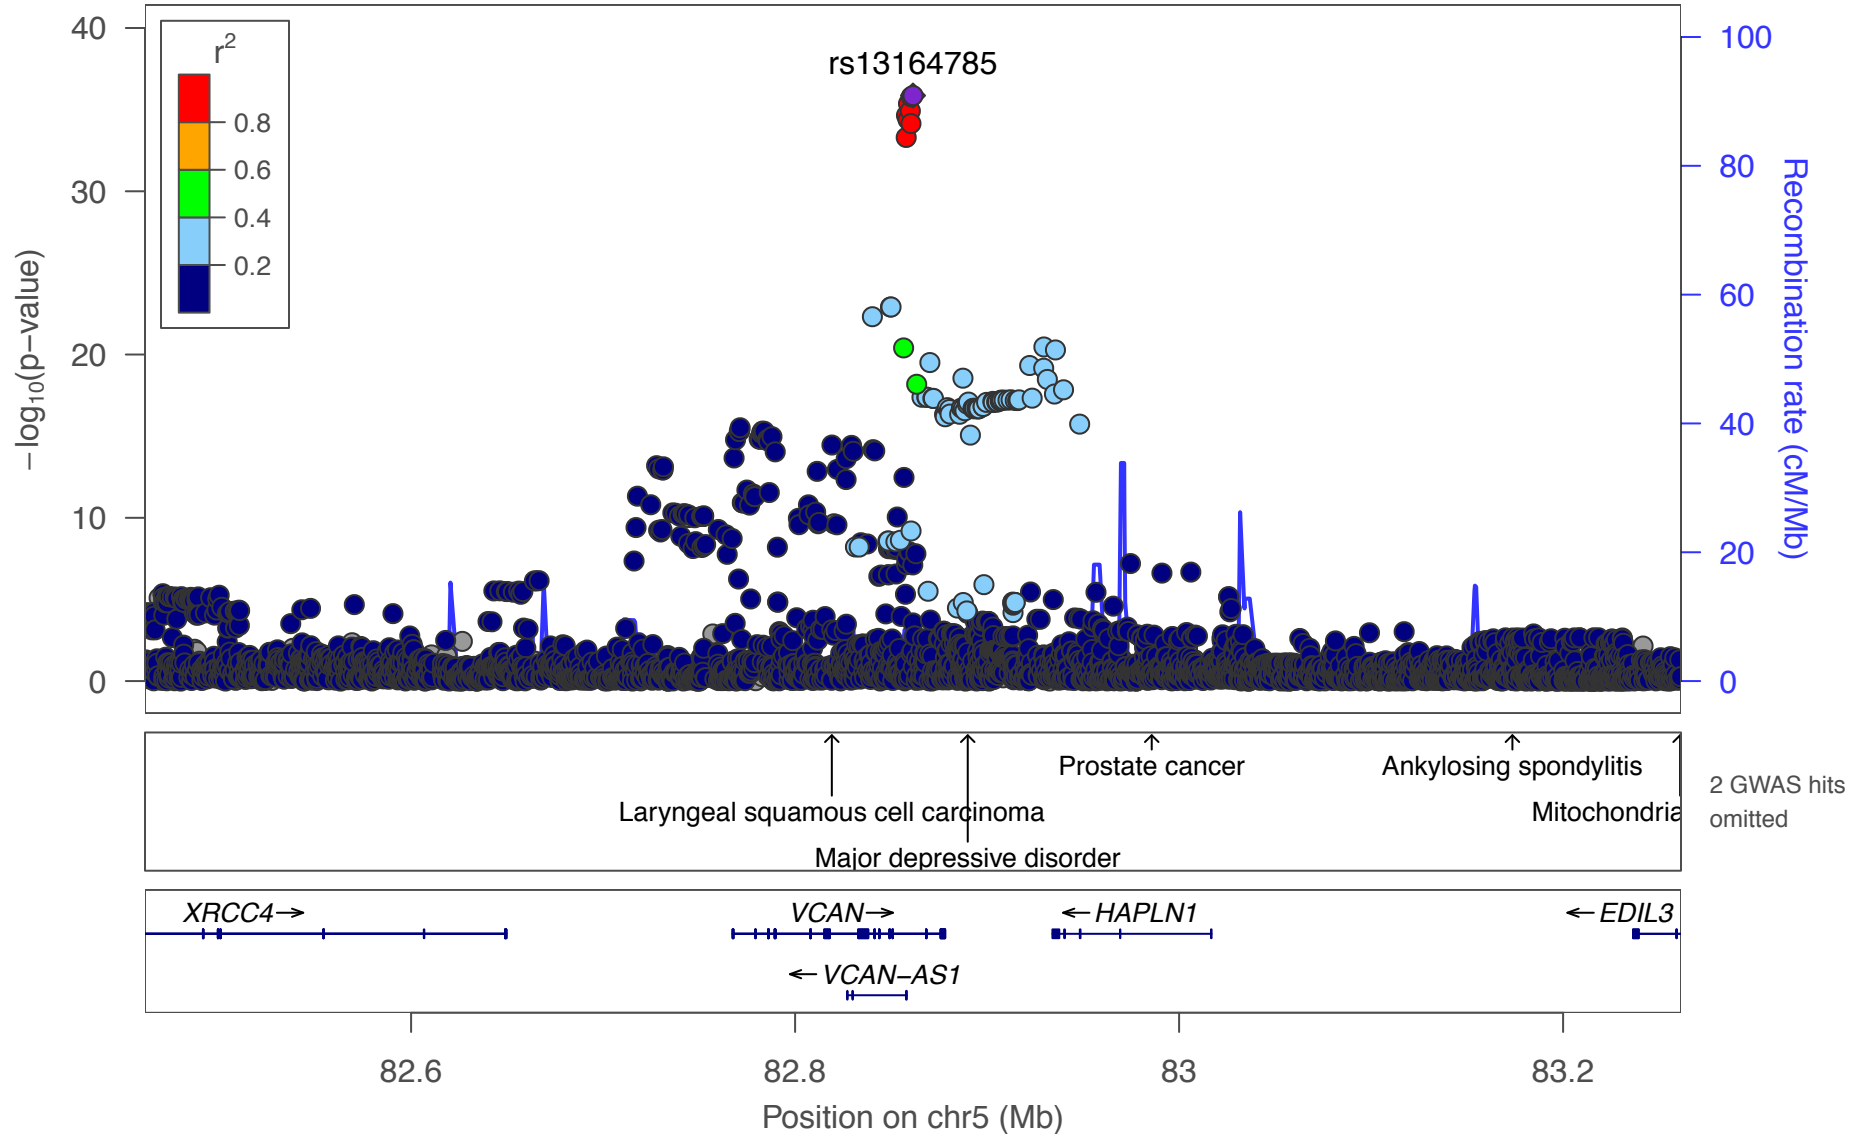

date: Thu Aug 17 17:55:19 2017

build: hg19

display range: chr5:82461400–83261400 [82461400–83261400]

hilite range: 0 – 0 [ 0 – 0 ]

reference SNP: chr5:82861400

number of SNPs plotted: 3396

min P.value: 1.37E–36 [chr5:82861400]

max P.value: 10E–1 [chr5:83215082]

omitted GWAS Hits: chr5:83.260938–Mitochondrial DNA levels, NA

## GWAS Catalog SNPs in Region

| <b>chr</b> | <b>pos (Mb)</b> | <b>trait</b>                      | <b>snp</b> |
|------------|-----------------|-----------------------------------|------------|
| 5          | 82.81912        | Laryngeal squamous cell carcinoma | rs310518   |
| 5          | 82.84549        | Diisocyanate-induced asthma       | rs3852186  |
| 5          | 82.88991        | Major depressive disorder         | rs310501   |
| 5          | 82.96073        | Visceral fat                      | rs3846635  |
| 5          | 82.98574        | Prostate cancer                   | rs4466137  |
| 5          | 83.17359        | Ankylosing spondylitis            | rs4552569  |
| 5          | 83.26094        | Mitochondrial DNA levels          | rs2301070  |

# TBSS\_ICVF\_Cingulum\_cingulate\_gyrus\_L

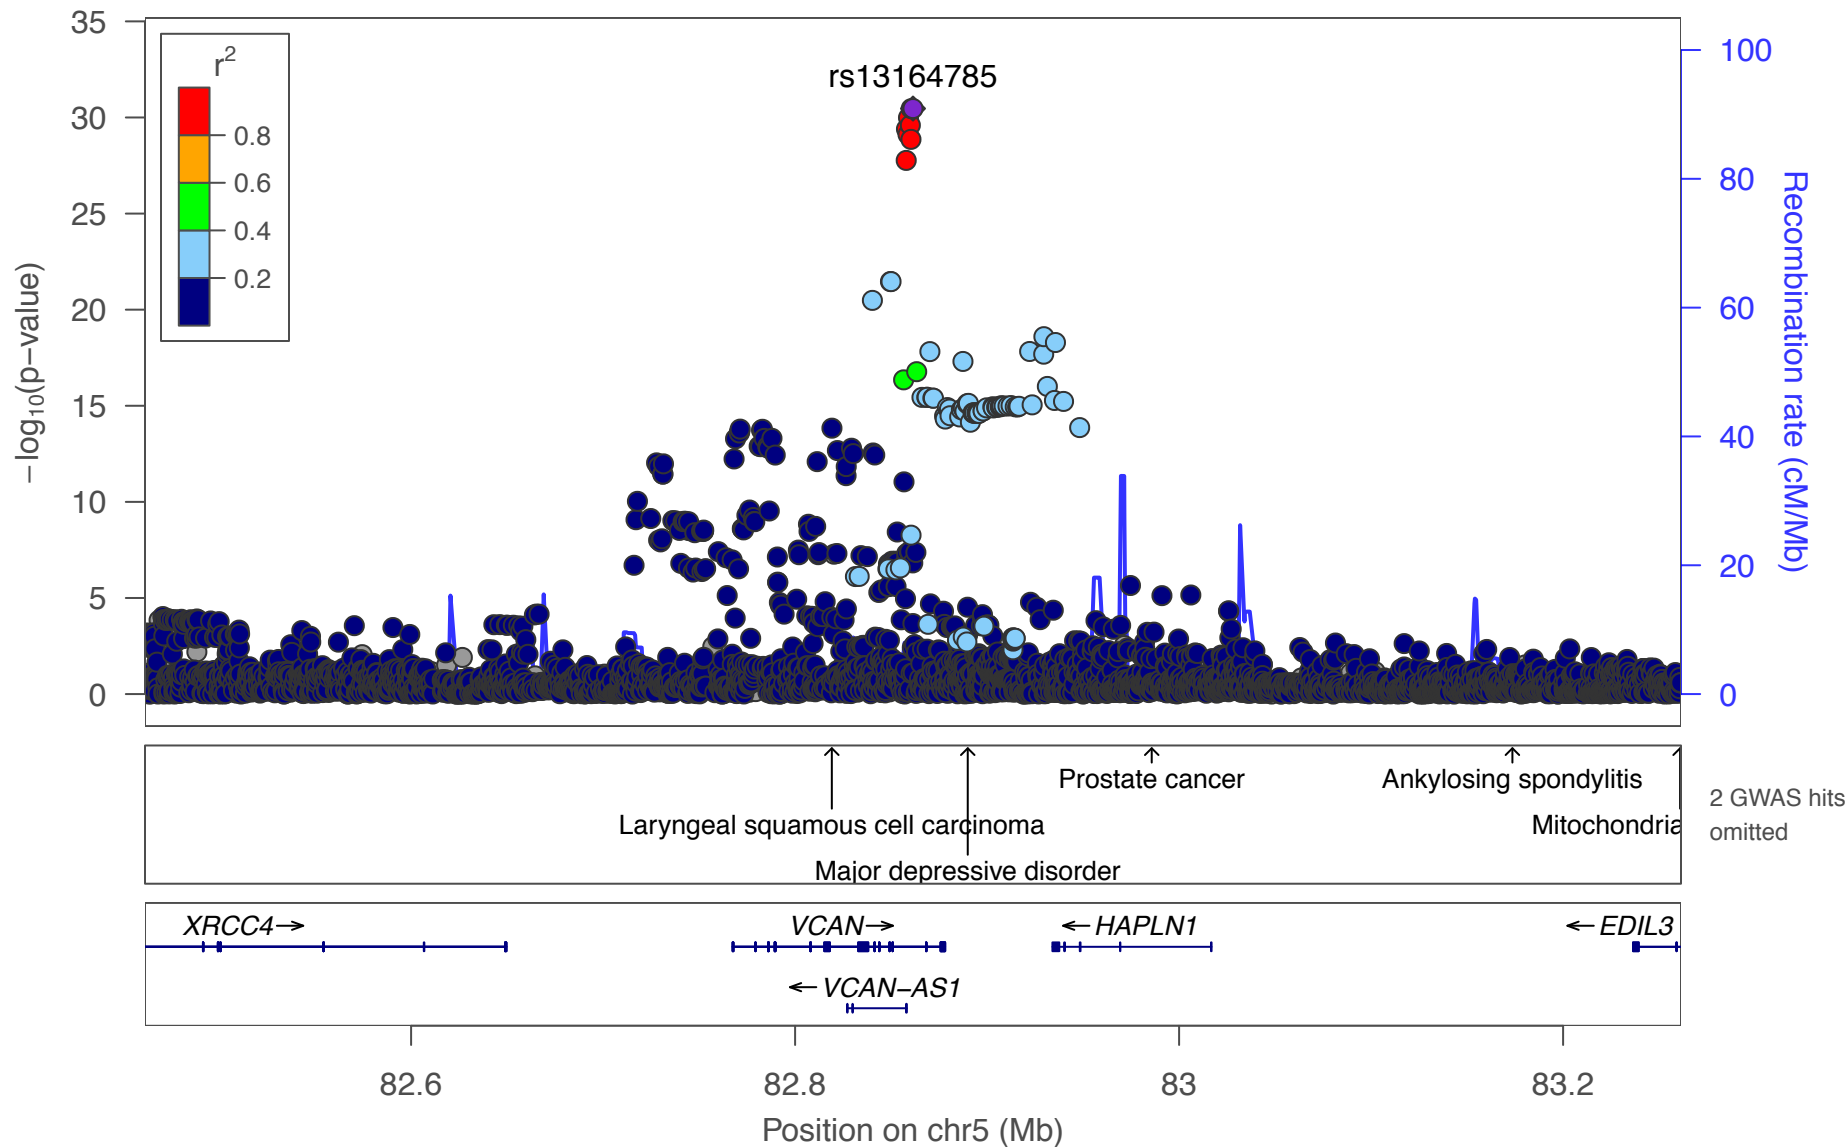

date: Thu Aug 17 17:55:19 2017

build: hg19

display range: chr5:82461400–83261400 [82461400–83261400]

hilite range: 0 – 0 [ 0 – 0 ]

reference SNP: chr5:82861400

number of SNPs plotted: 3396

min P.value: 3.44E–31 [chr5:82861400]

max P.value: 10E–1 [chr5:82919700]

omitted GWAS Hits: chr5:83.260938–Mitochondrial DNA levels, NA

## GWAS Catalog SNPs in Region

| <b>chr</b> | <b>pos (Mb)</b> | <b>trait</b>                      | <b>snp</b> |
|------------|-----------------|-----------------------------------|------------|
| 5          | 82.81912        | Laryngeal squamous cell carcinoma | rs310518   |
| 5          | 82.84549        | Diisocyanate-induced asthma       | rs3852186  |
| 5          | 82.88991        | Major depressive disorder         | rs310501   |
| 5          | 82.96073        | Visceral fat                      | rs3846635  |
| 5          | 82.98574        | Prostate cancer                   | rs4466137  |
| 5          | 83.17359        | Ankylosing spondylitis            | rs4552569  |
| 5          | 83.26094        | Mitochondrial DNA levels          | rs2301070  |

# TBSS\_ICVF\_Cingulum\_hippocampus\_R

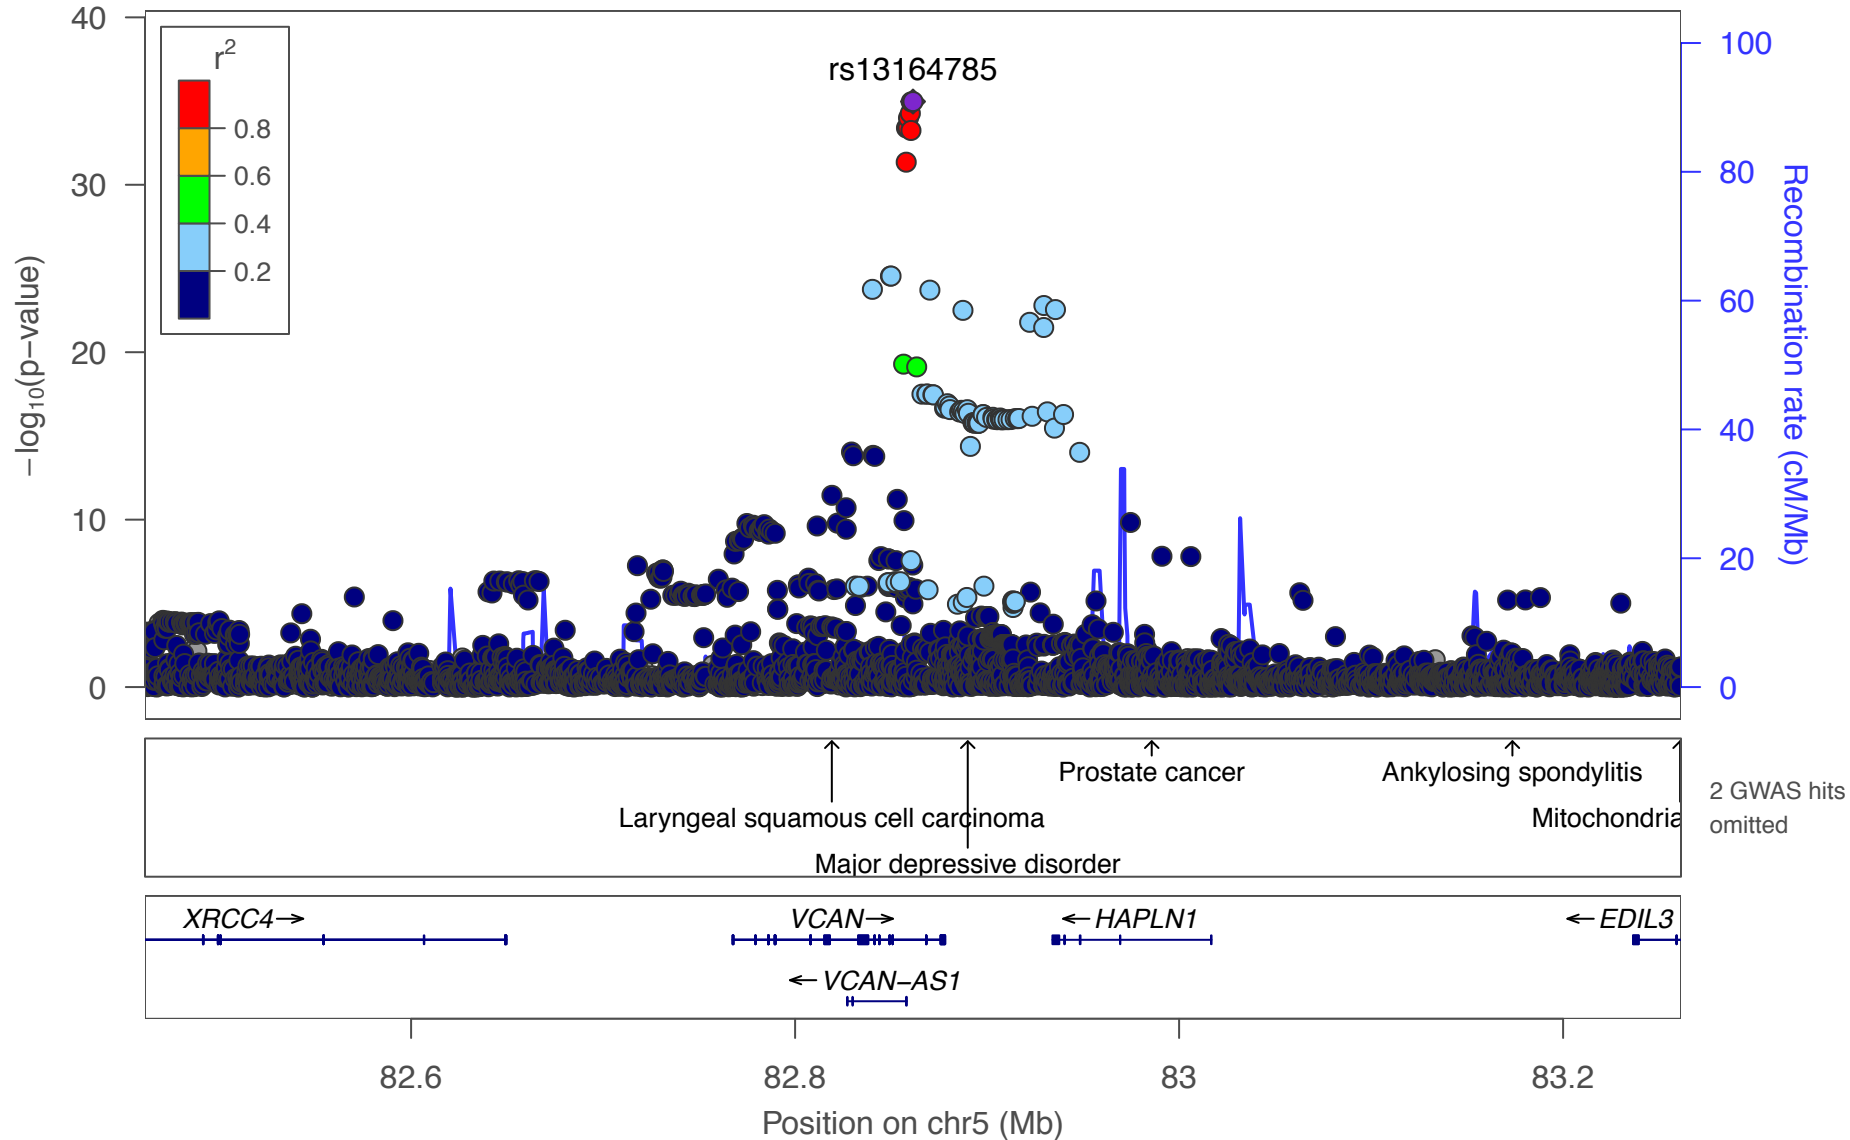



date: Thu Aug 17 17:55:19 2017

build: hg19

display range: chr5:82461400–83261400 [82461400–83261400]

hilite range: 0 – 0 [ 0 – 0 ]

reference SNP: chr5:82861400

number of SNPs plotted: 3396

min P.value: 1.07E–35 [chr5:82861400]

max P.value: 9.99E–1 [chr5:82510029]

omitted GWAS Hits: chr5:83.260938–Mitochondrial DNA levels, NA

## GWAS Catalog SNPs in Region

| <b>chr</b> | <b>pos (Mb)</b> | <b>trait</b>                      | <b>snp</b> |
|------------|-----------------|-----------------------------------|------------|
| 5          | 82.81912        | Laryngeal squamous cell carcinoma | rs310518   |
| 5          | 82.84549        | Diisocyanate-induced asthma       | rs3852186  |
| 5          | 82.88991        | Major depressive disorder         | rs310501   |
| 5          | 82.96073        | Visceral fat                      | rs3846635  |
| 5          | 82.98574        | Prostate cancer                   | rs4466137  |
| 5          | 83.17359        | Ankylosing spondylitis            | rs4552569  |
| 5          | 83.26094        | Mitochondrial DNA levels          | rs2301070  |

# TBSS\_ICVF\_Cingulum\_hippocampus\_L

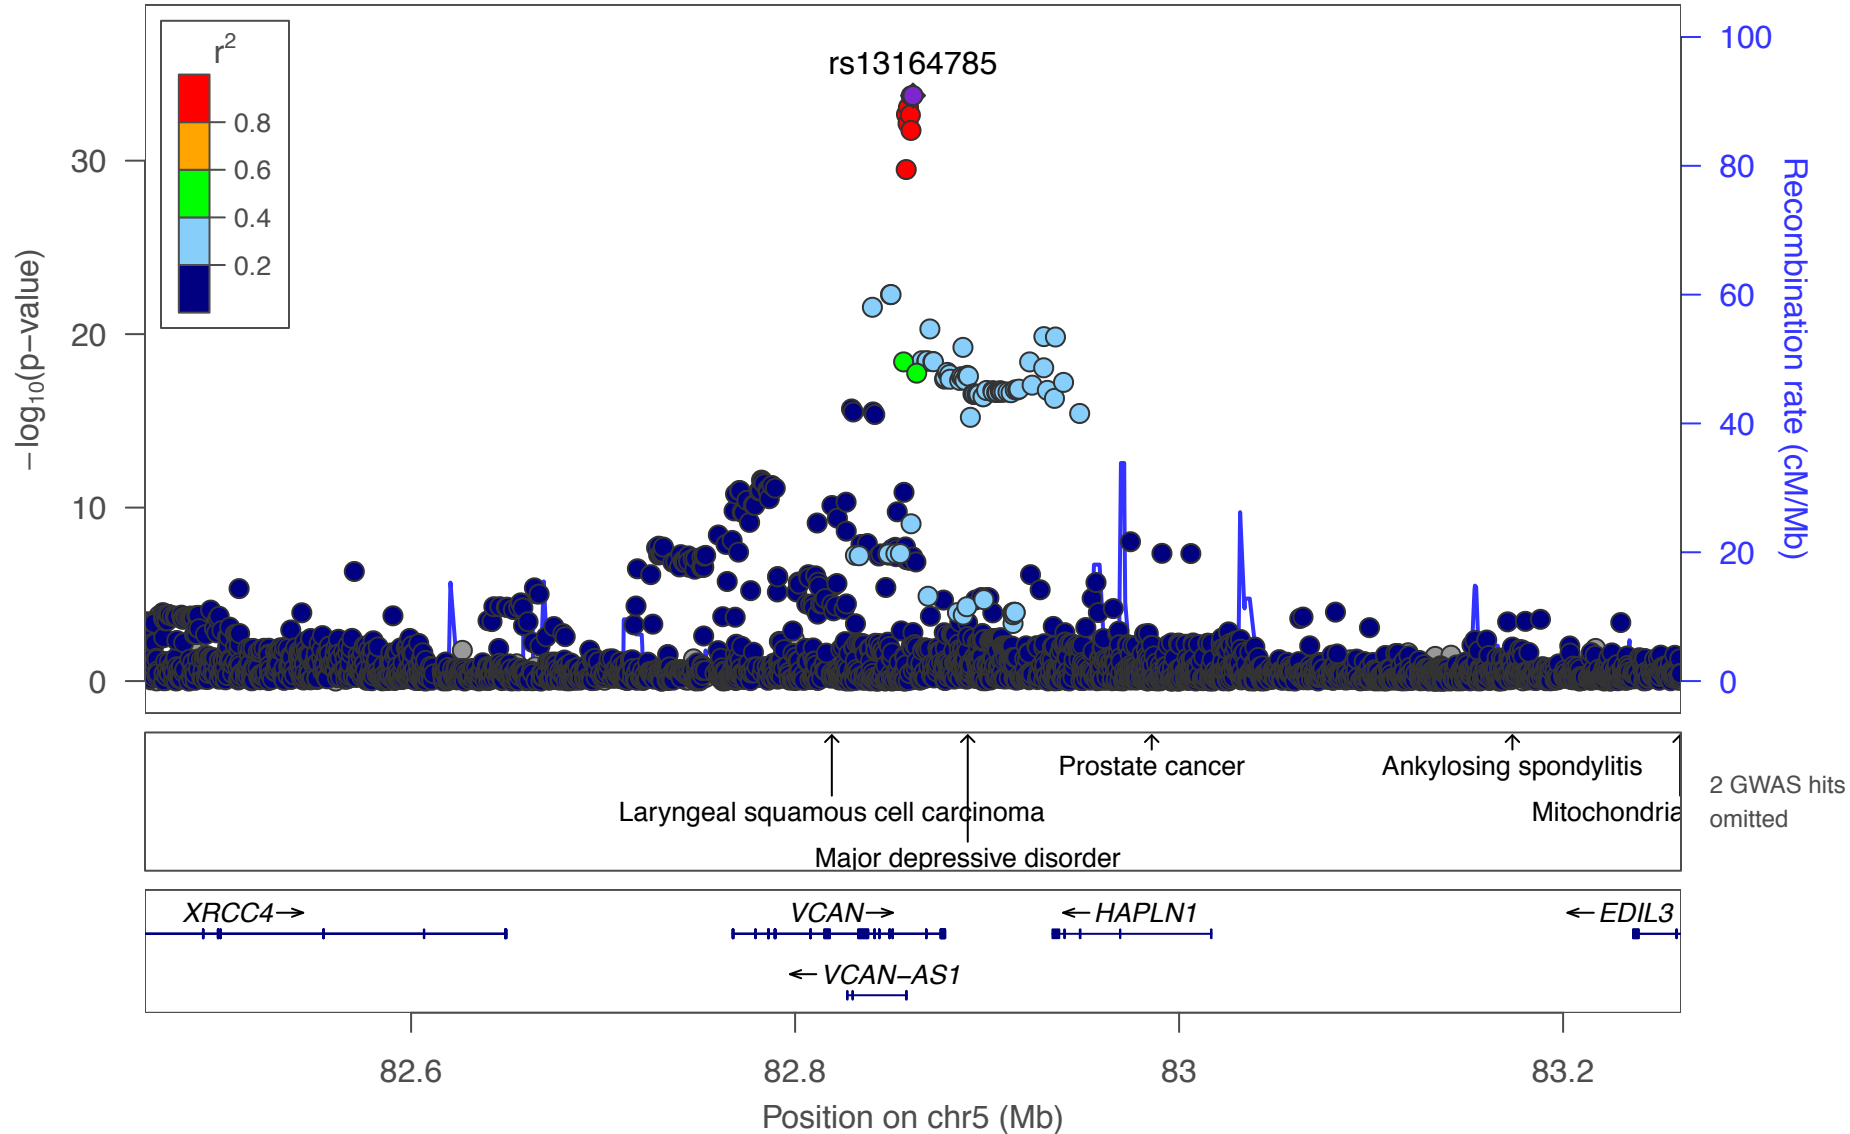

date: Thu Aug 17 17:55:19 2017

build: hg19

display range: chr5:82461400–83261400 [82461400–83261400]

hilite range: 0 – 0 [ 0 – 0 ]

reference SNP: chr5:82861400

number of SNPs plotted: 3396

min P.value: 1.77E–34 [chr5:82861400]

max P.value: 10E–1 [chr5:83017764]

omitted GWAS Hits: chr5:83.260938–Mitochondrial DNA levels, NA

## GWAS Catalog SNPs in Region

| <b>chr</b> | <b>pos (Mb)</b> | <b>trait</b>                      | <b>snp</b> |
|------------|-----------------|-----------------------------------|------------|
| 5          | 82.81912        | Laryngeal squamous cell carcinoma | rs310518   |
| 5          | 82.84549        | Diisocyanate-induced asthma       | rs3852186  |
| 5          | 82.88991        | Major depressive disorder         | rs310501   |
| 5          | 82.96073        | Visceral fat                      | rs3846635  |
| 5          | 82.98574        | Prostate cancer                   | rs4466137  |
| 5          | 83.17359        | Ankylosing spondylitis            | rs4552569  |
| 5          | 83.26094        | Mitochondrial DNA levels          | rs2301070  |

# TBSS\_ICVF\_Fornix\_cres+Stria\_terminalis\_L

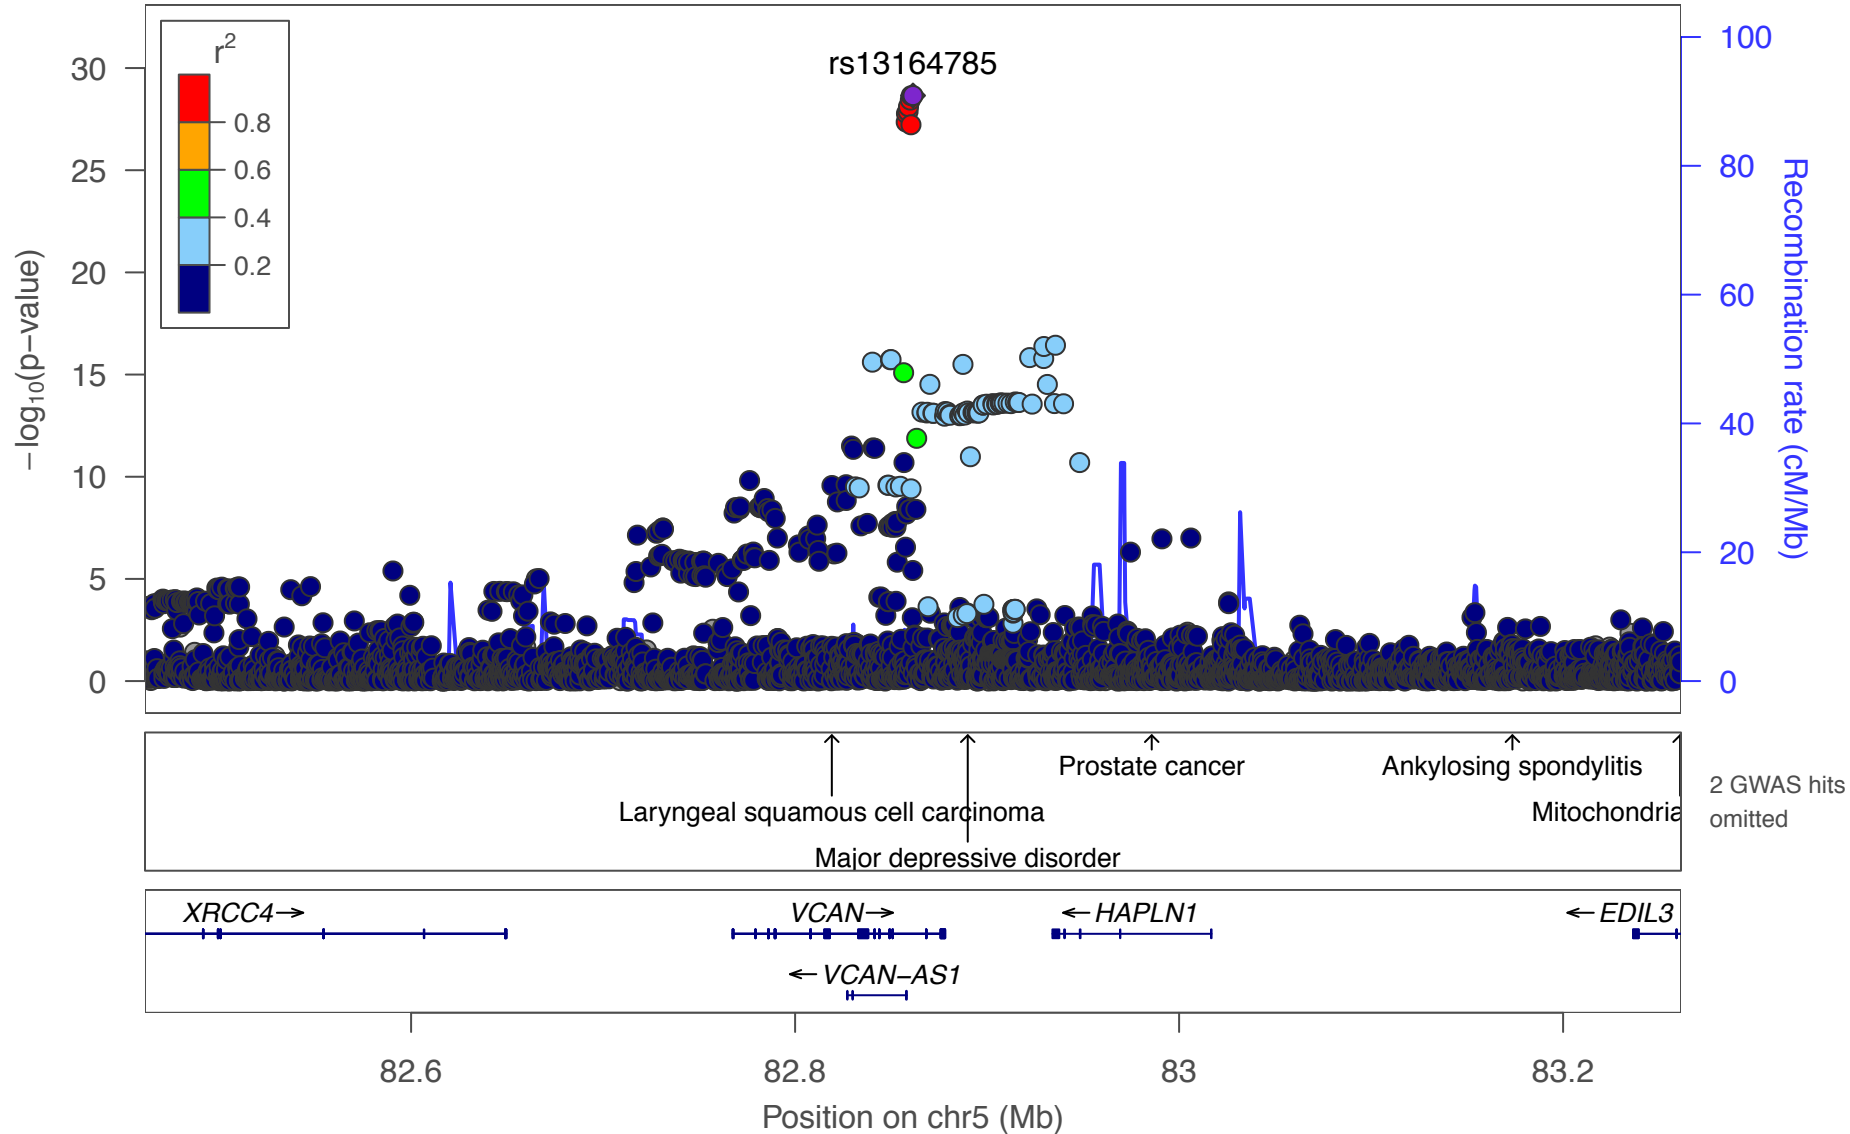

date: Thu Aug 17 17:55:19 2017

build: hg19

display range: chr5:82461400–83261400 [82461400–83261400]

hilite range: 0 – 0 [ 0 – 0 ]

reference SNP: chr5:82861400

number of SNPs plotted: 3396

min P.value: 2.22E–29 [chr5:82861400]

max P.value: 9.99E–1 [chr5:83092851]

omitted GWAS Hits: chr5:83.260938–Mitochondrial DNA levels, NA

## GWAS Catalog SNPs in Region

| <b>chr</b> | <b>pos (Mb)</b> | <b>trait</b>                      | <b>snp</b> |
|------------|-----------------|-----------------------------------|------------|
| 5          | 82.81912        | Laryngeal squamous cell carcinoma | rs310518   |
| 5          | 82.84549        | Diisocyanate-induced asthma       | rs3852186  |
| 5          | 82.88991        | Major depressive disorder         | rs310501   |
| 5          | 82.96073        | Visceral fat                      | rs3846635  |
| 5          | 82.98574        | Prostate cancer                   | rs4466137  |
| 5          | 83.17359        | Ankylosing spondylitis            | rs4552569  |
| 5          | 83.26094        | Mitochondrial DNA levels          | rs2301070  |



# TBSS\_ICVF\_Superior\_longitudinal\_fasciculus\_L

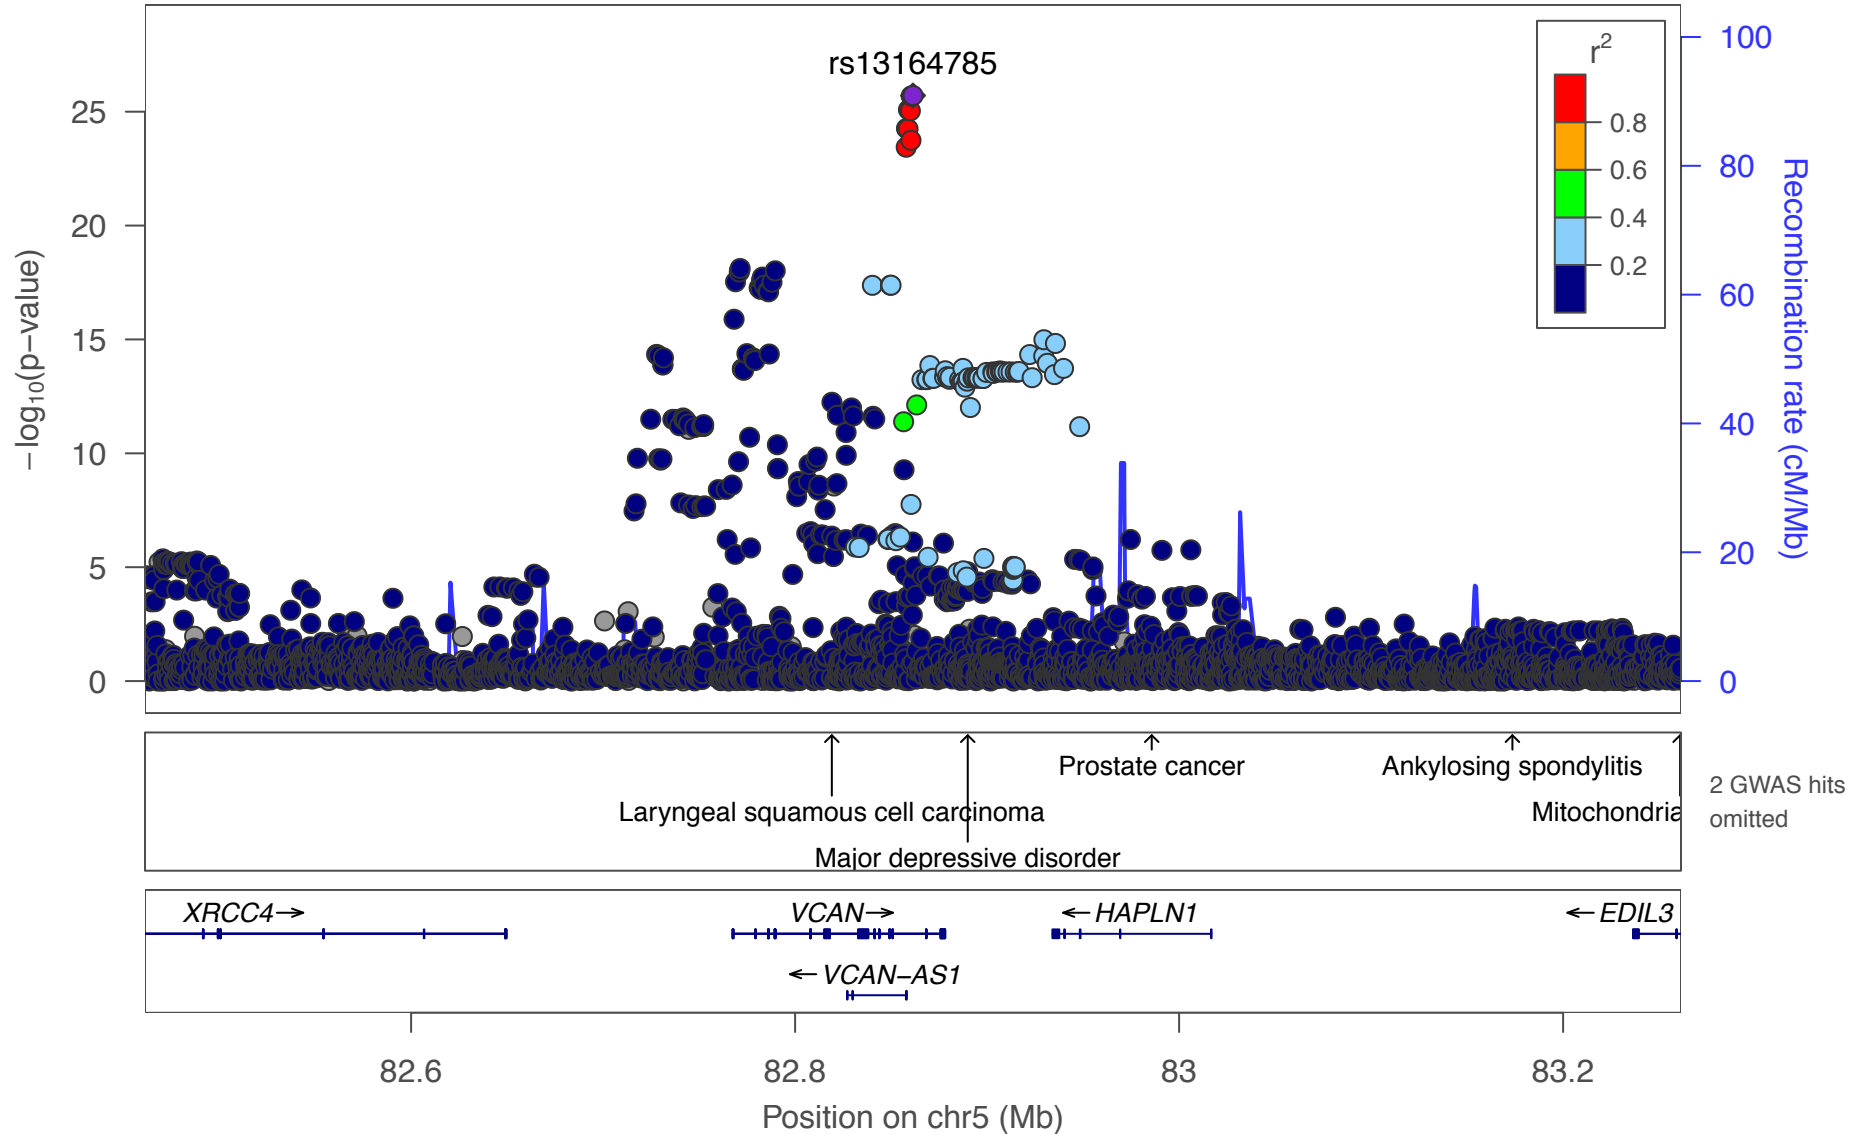

date: Thu Aug 17 18:10:34 2017

build: hg19

display range: chr5:82461400–83261400 [82461400–83261400]

hilite range: 0 – 0 [ 0 – 0 ]

reference SNP: chr5:82861400

number of SNPs plotted: 3396

min P.value: 1.95E–26 [chr5:82861400]

max P.value: 9.99E–1 [chr5:83169008]

omitted GWAS Hits: chr5:83.260938–Mitochondrial DNA levels, NA

## GWAS Catalog SNPs in Region

| <b>chr</b> | <b>pos (Mb)</b> | <b>trait</b>                      | <b>snp</b> |
|------------|-----------------|-----------------------------------|------------|
| 5          | 82.81912        | Laryngeal squamous cell carcinoma | rs310518   |
| 5          | 82.84549        | Diisocyanate-induced asthma       | rs3852186  |
| 5          | 82.88991        | Major depressive disorder         | rs310501   |
| 5          | 82.96073        | Visceral fat                      | rs3846635  |
| 5          | 82.98574        | Prostate cancer                   | rs4466137  |
| 5          | 83.17359        | Ankylosing spondylitis            | rs4552569  |
| 5          | 83.26094        | Mitochondrial DNA levels          | rs2301070  |

# TBSS\_ICVF\_Superior\_fronto-occipital\_fasciculus\_R

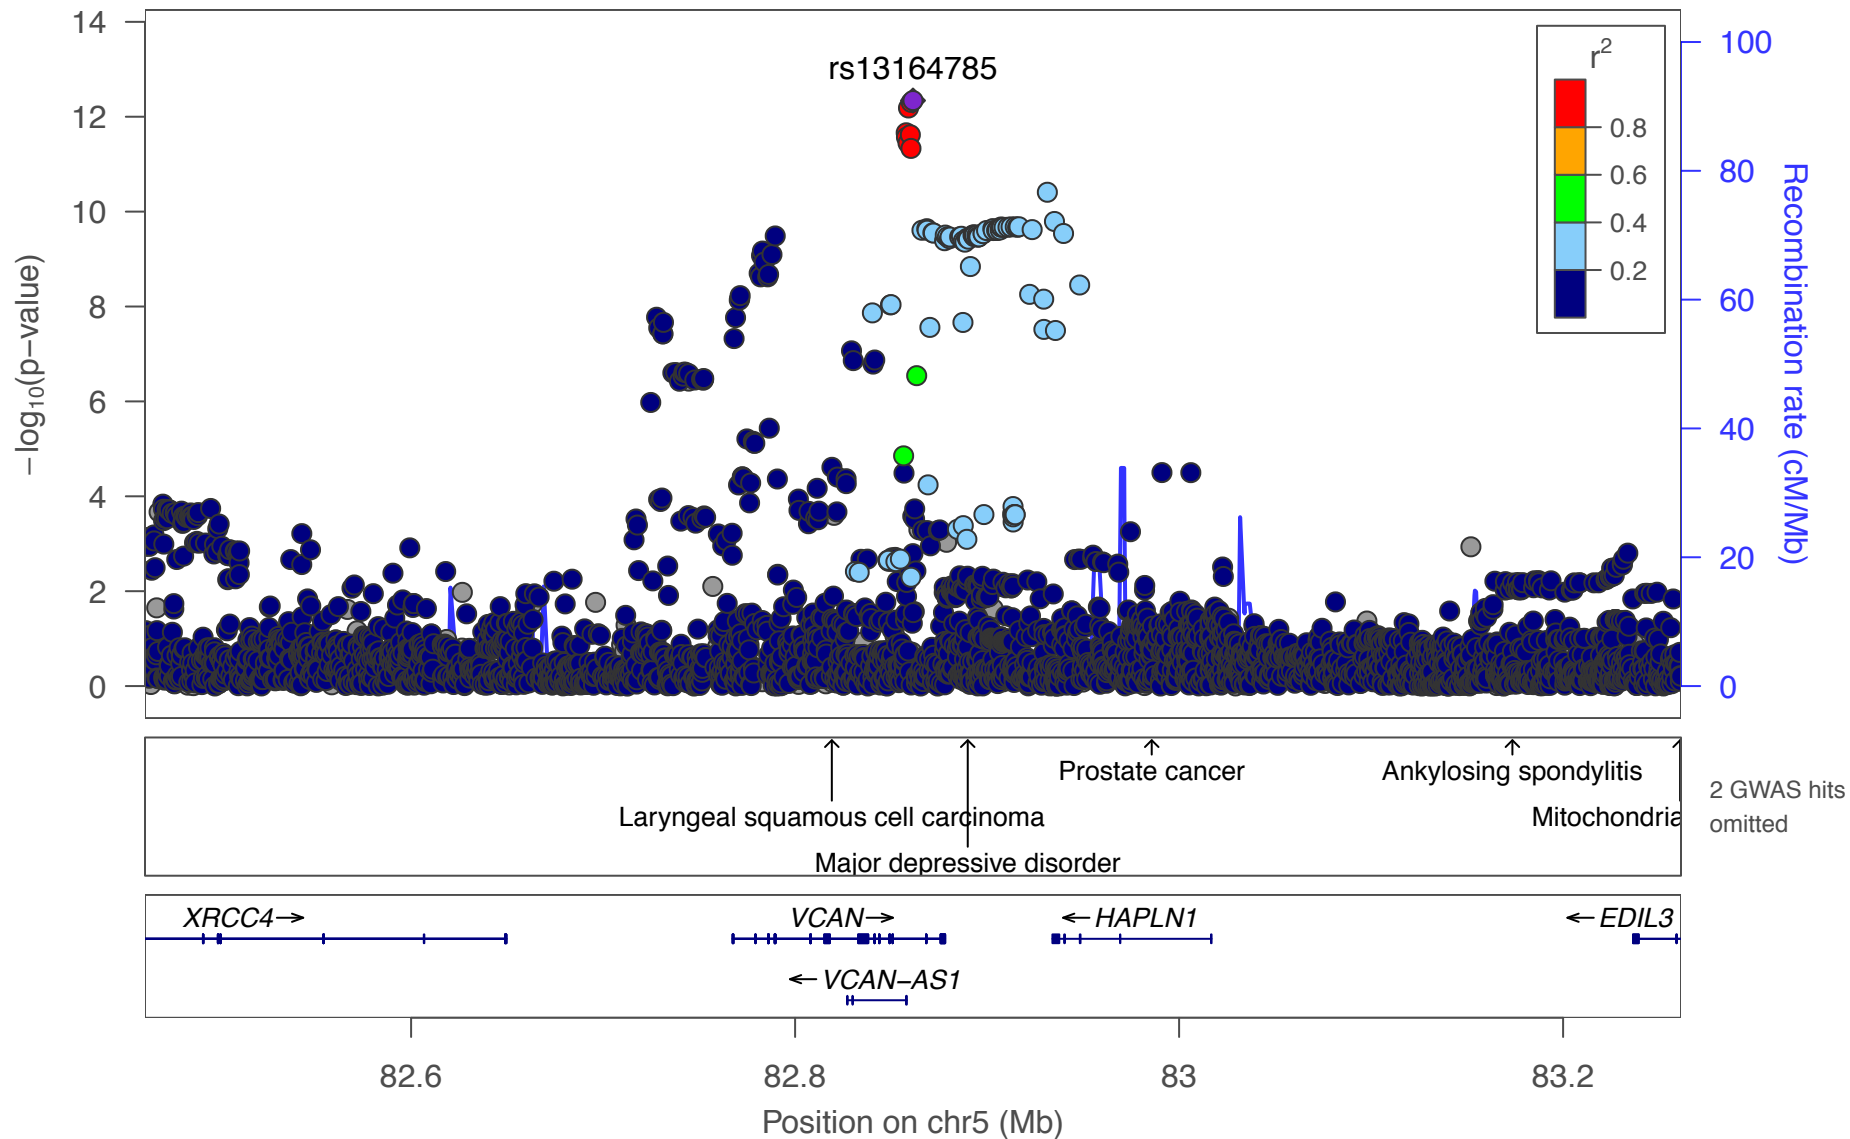

date: Thu Aug 17 17:55:19 2017

build: hg19

display range: chr5:82461400–83261400 [82461400–83261400]

hilite range: 0 – 0 [ 0 – 0 ]

reference SNP: chr5:82861400

number of SNPs plotted: 3396

min P.value: 4.56E–13 [chr5:82861400]

max P.value: 10E–1 [chr5:82712592]

omitted GWAS Hits: chr5:83.260938–Mitochondrial DNA levels, NA

## GWAS Catalog SNPs in Region

| <b>chr</b> | <b>pos (Mb)</b> | <b>trait</b>                      | <b>snp</b> |
|------------|-----------------|-----------------------------------|------------|
| 5          | 82.81912        | Laryngeal squamous cell carcinoma | rs310518   |
| 5          | 82.84549        | Diisocyanate-induced asthma       | rs3852186  |
| 5          | 82.88991        | Major depressive disorder         | rs310501   |
| 5          | 82.96073        | Visceral fat                      | rs3846635  |
| 5          | 82.98574        | Prostate cancer                   | rs4466137  |
| 5          | 83.17359        | Ankylosing spondylitis            | rs4552569  |
| 5          | 83.26094        | Mitochondrial DNA levels          | rs2301070  |

# TBSS\_ICVF\_Uncinate\_fasciculus\_R

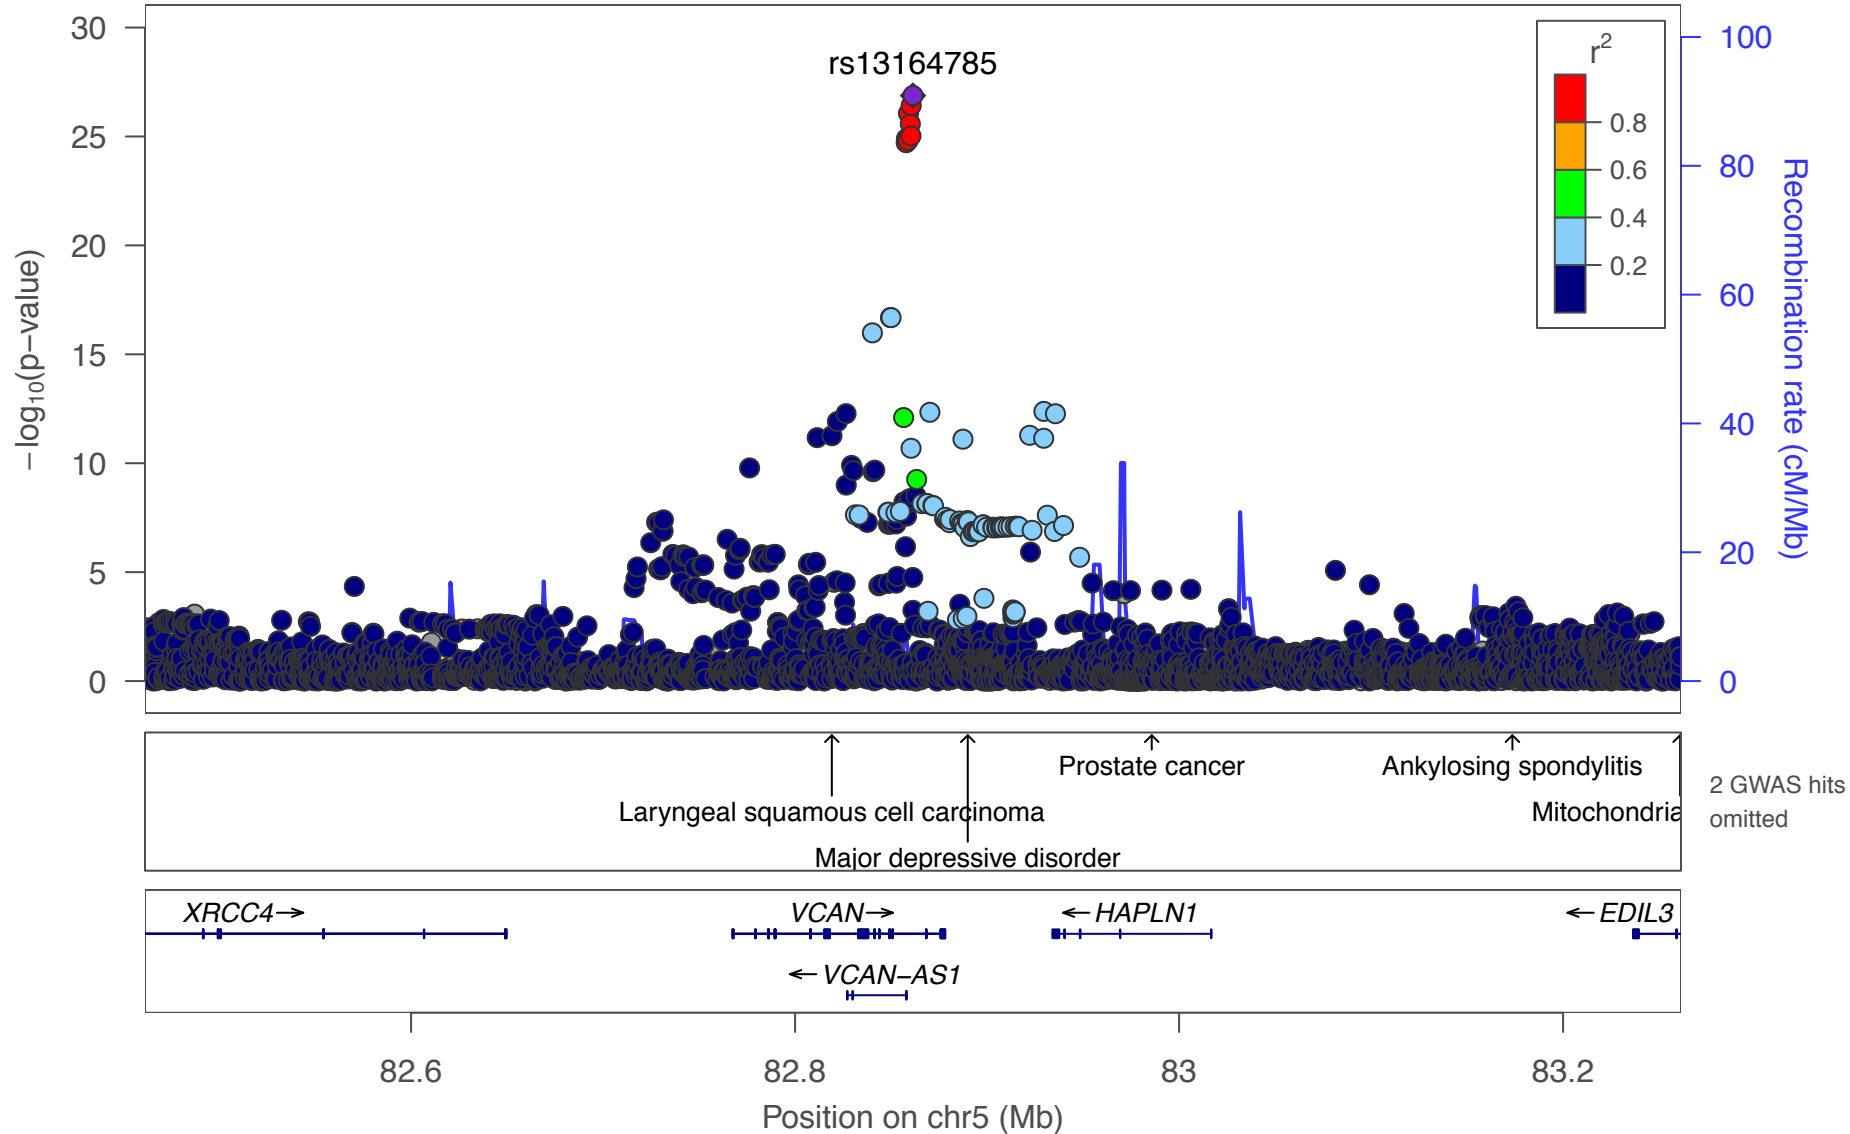

date: Thu Aug 17 17:58:11 2017

build: hg19

display range: chr5:82461400–83261400 [82461400–83261400]

hilite range: 0 – 0 [ 0 – 0 ]

reference SNP: chr5:82861400

number of SNPs plotted: 3396

min P.value: 1.32E–27 [chr5:82861400]

max P.value: 9.99E–1 [chr5:82973210]

omitted GWAS Hits: chr5:83.260938–Mitochondrial DNA levels, NA



## GWAS Catalog SNPs in Region

| <b>chr</b> | <b>pos (Mb)</b> | <b>trait</b>                      | <b>snp</b> |
|------------|-----------------|-----------------------------------|------------|
| 5          | 82.81912        | Laryngeal squamous cell carcinoma | rs310518   |
| 5          | 82.84549        | Diisocyanate-induced asthma       | rs3852186  |
| 5          | 82.88991        | Major depressive disorder         | rs310501   |
| 5          | 82.96073        | Visceral fat                      | rs3846635  |
| 5          | 82.98574        | Prostate cancer                   | rs4466137  |
| 5          | 83.17359        | Ankylosing spondylitis            | rs4552569  |
| 5          | 83.26094        | Mitochondrial DNA levels          | rs2301070  |

# TBSS\_ICVF\_Uncinate\_fasciculus\_L

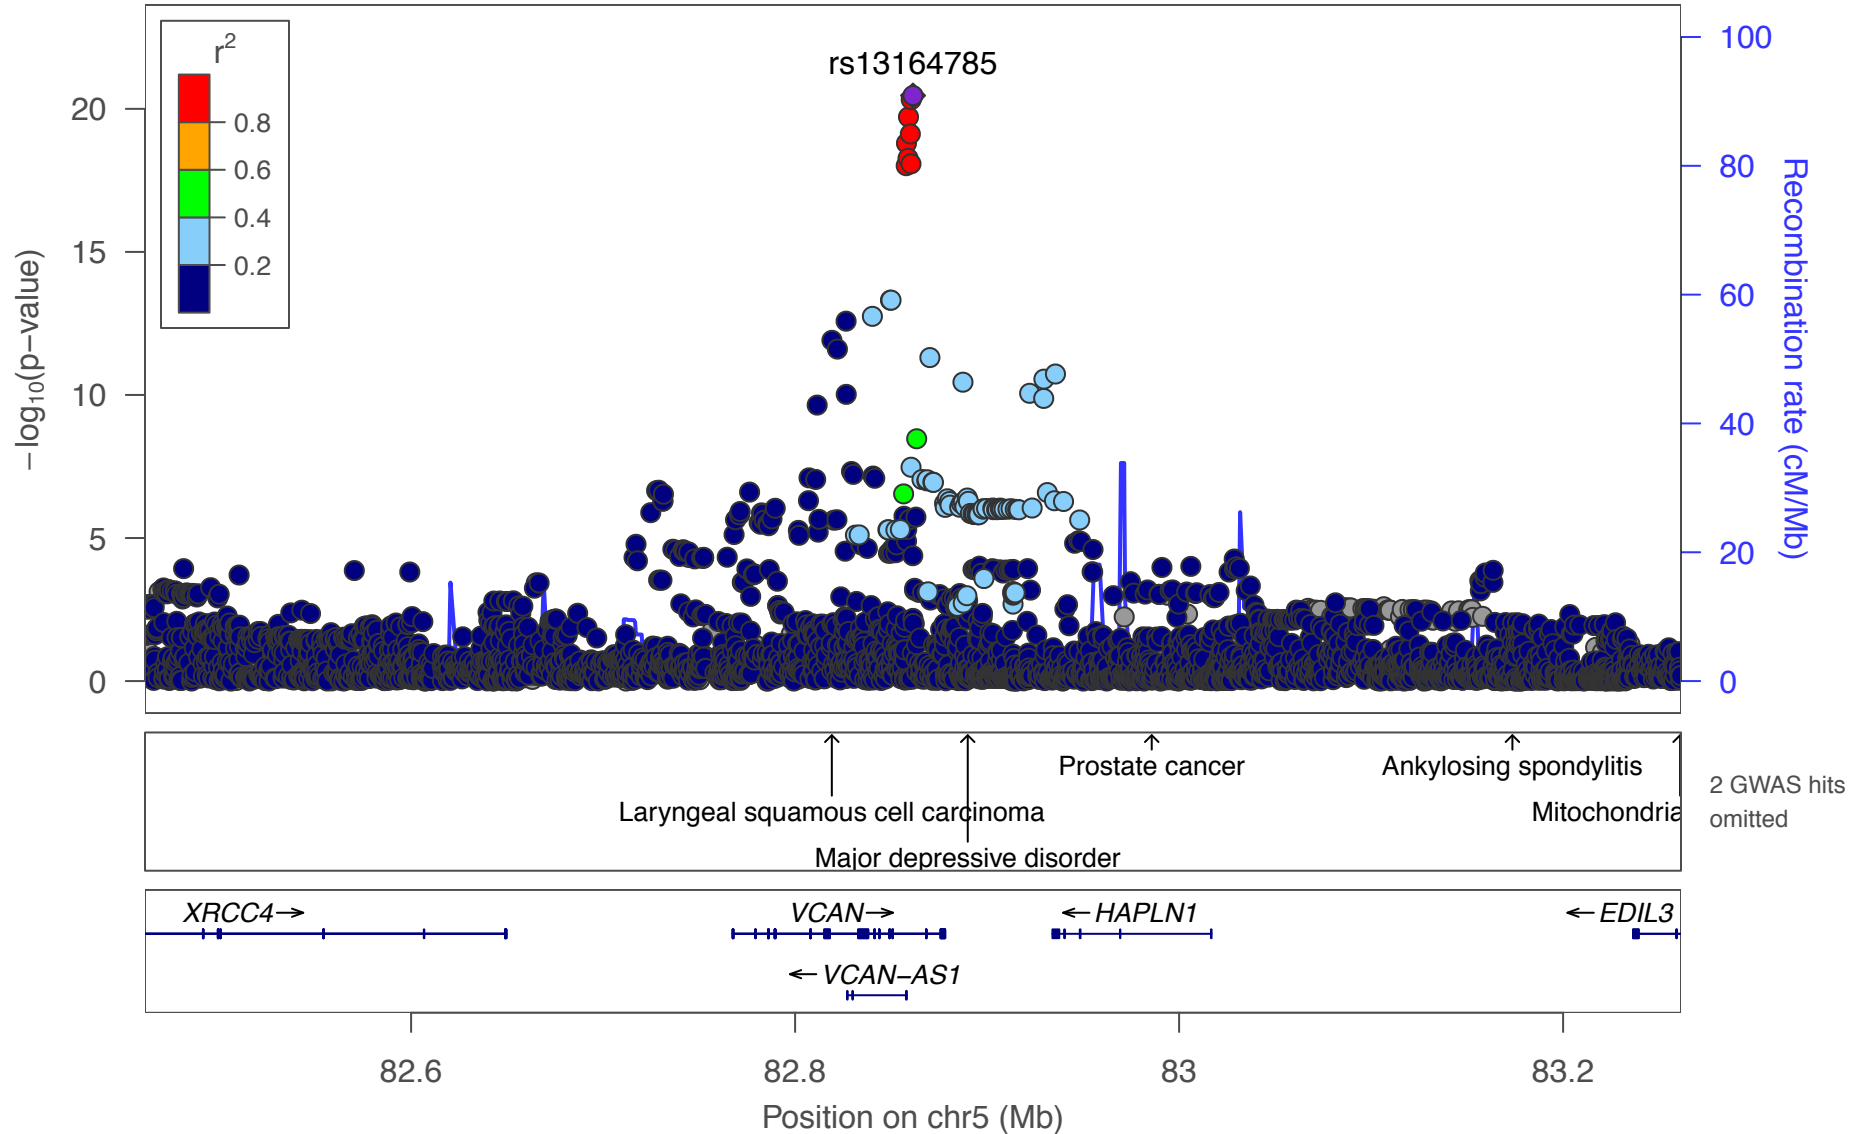

date: Thu Aug 17 17:58:11 2017

build: hg19

display range: chr5:82461400–83261400 [82461400–83261400]

hilite range: 0 – 0 [ 0 – 0 ]

reference SNP: chr5:82861400

number of SNPs plotted: 3396

min P.value: 3.43E–21 [chr5:82861400]

max P.value: 10E–1 [chr5:83117229]

omitted GWAS Hits: chr5:83.260938–Mitochondrial DNA levels, NA

## GWAS Catalog SNPs in Region

| <b>chr</b> | <b>pos (Mb)</b> | <b>trait</b>                      | <b>snp</b> |
|------------|-----------------|-----------------------------------|------------|
| 5          | 82.81912        | Laryngeal squamous cell carcinoma | rs310518   |
| 5          | 82.84549        | Diisocyanate-induced asthma       | rs3852186  |
| 5          | 82.88991        | Major depressive disorder         | rs310501   |
| 5          | 82.96073        | Visceral fat                      | rs3846635  |
| 5          | 82.98574        | Prostate cancer                   | rs4466137  |
| 5          | 83.17359        | Ankylosing spondylitis            | rs4552569  |
| 5          | 83.26094        | Mitochondrial DNA levels          | rs2301070  |

# ProbtrackX\_FA\_atr\_I

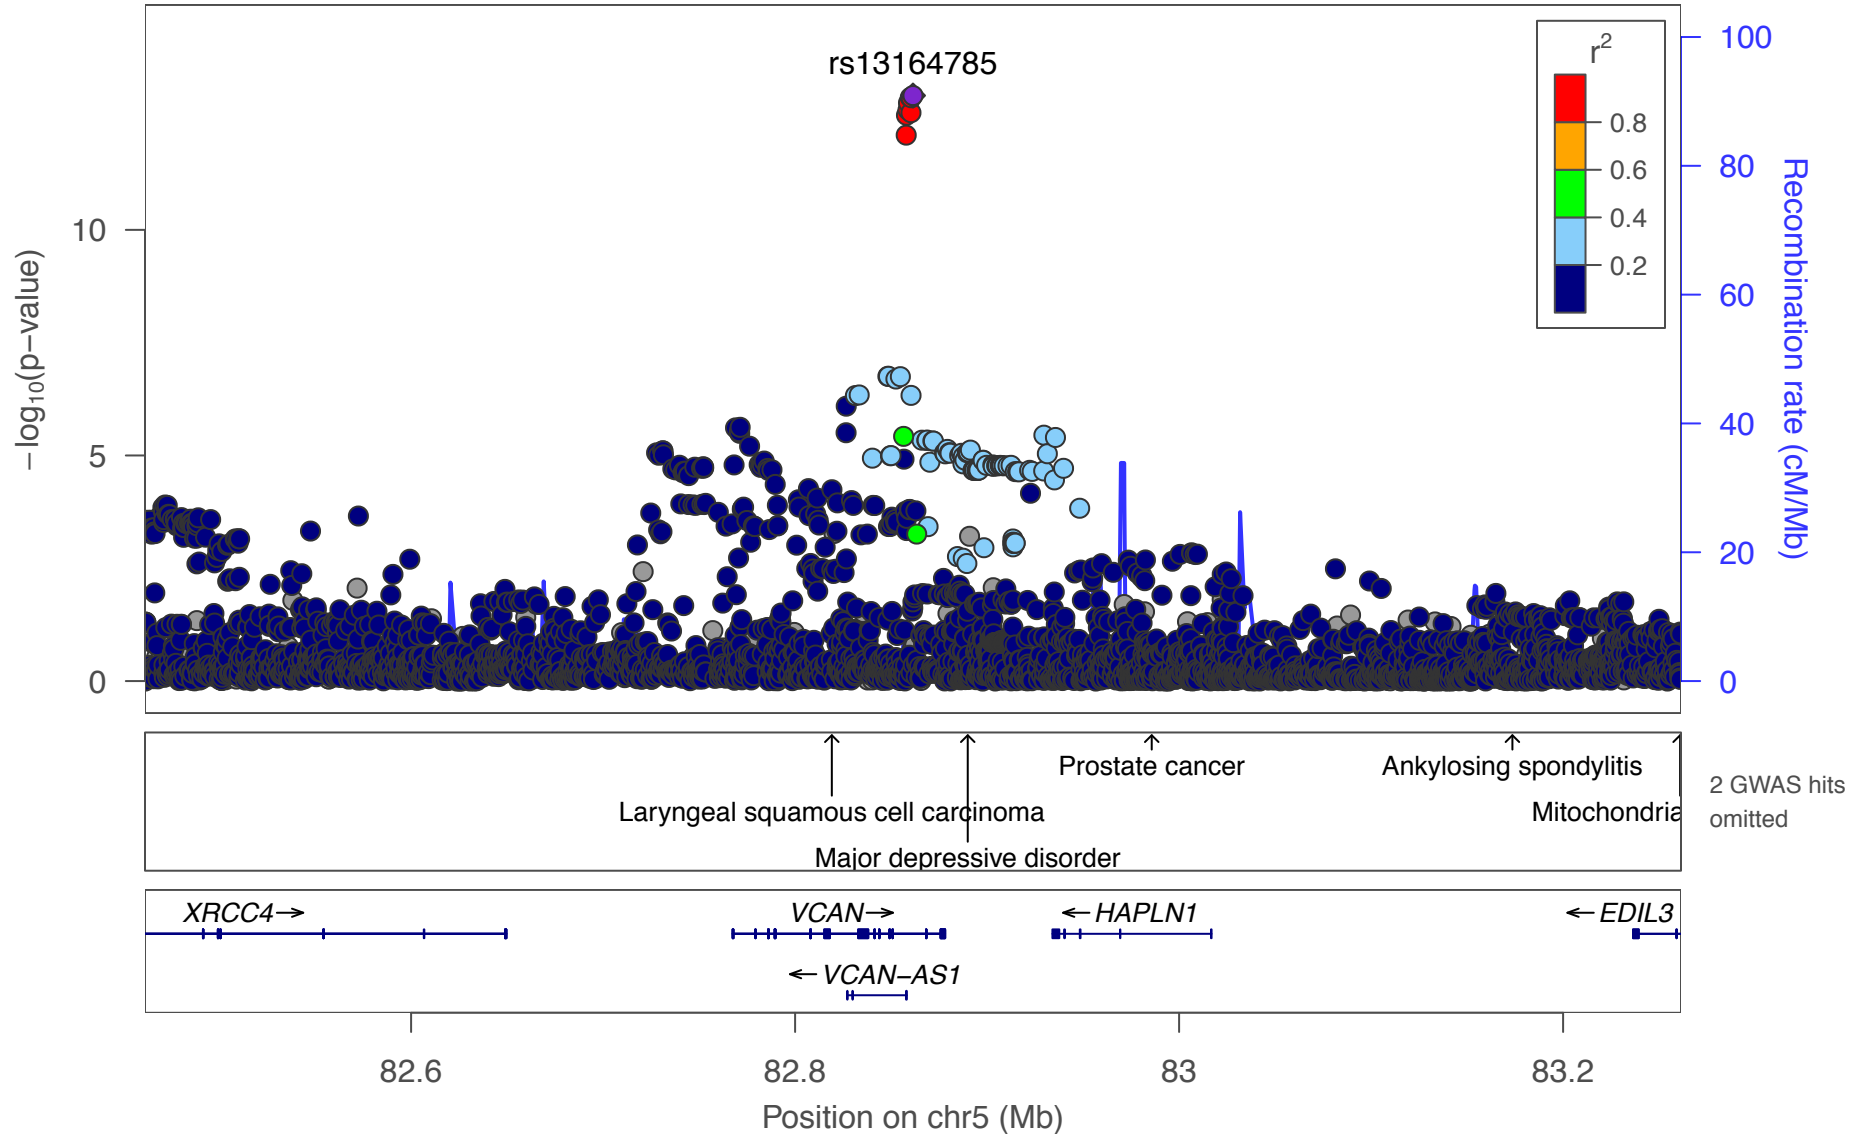

date: Thu Aug 17 17:58:11 2017

build: hg19

display range: chr5:82461400–83261400 [82461400–83261400]

hilite range: 0 – 0 [ 0 – 0 ]

reference SNP: chr5:82861400

number of SNPs plotted: 3396

min P.value: 1.05E–13 [chr5:82861400]

max P.value: 10E–1 [chr5:82994521]

omitted GWAS Hits: chr5:83.260938–Mitochondrial DNA levels, NA

## GWAS Catalog SNPs in Region

| <b>chr</b> | <b>pos (Mb)</b> | <b>trait</b>                      | <b>snp</b> |
|------------|-----------------|-----------------------------------|------------|
| 5          | 82.81912        | Laryngeal squamous cell carcinoma | rs310518   |
| 5          | 82.84549        | Diisocyanate-induced asthma       | rs3852186  |
| 5          | 82.88991        | Major depressive disorder         | rs310501   |
| 5          | 82.96073        | Visceral fat                      | rs3846635  |
| 5          | 82.98574        | Prostate cancer                   | rs4466137  |
| 5          | 83.17359        | Ankylosing spondylitis            | rs4552569  |
| 5          | 83.26094        | Mitochondrial DNA levels          | rs2301070  |

# ProbtrackX\_FA\_fmi

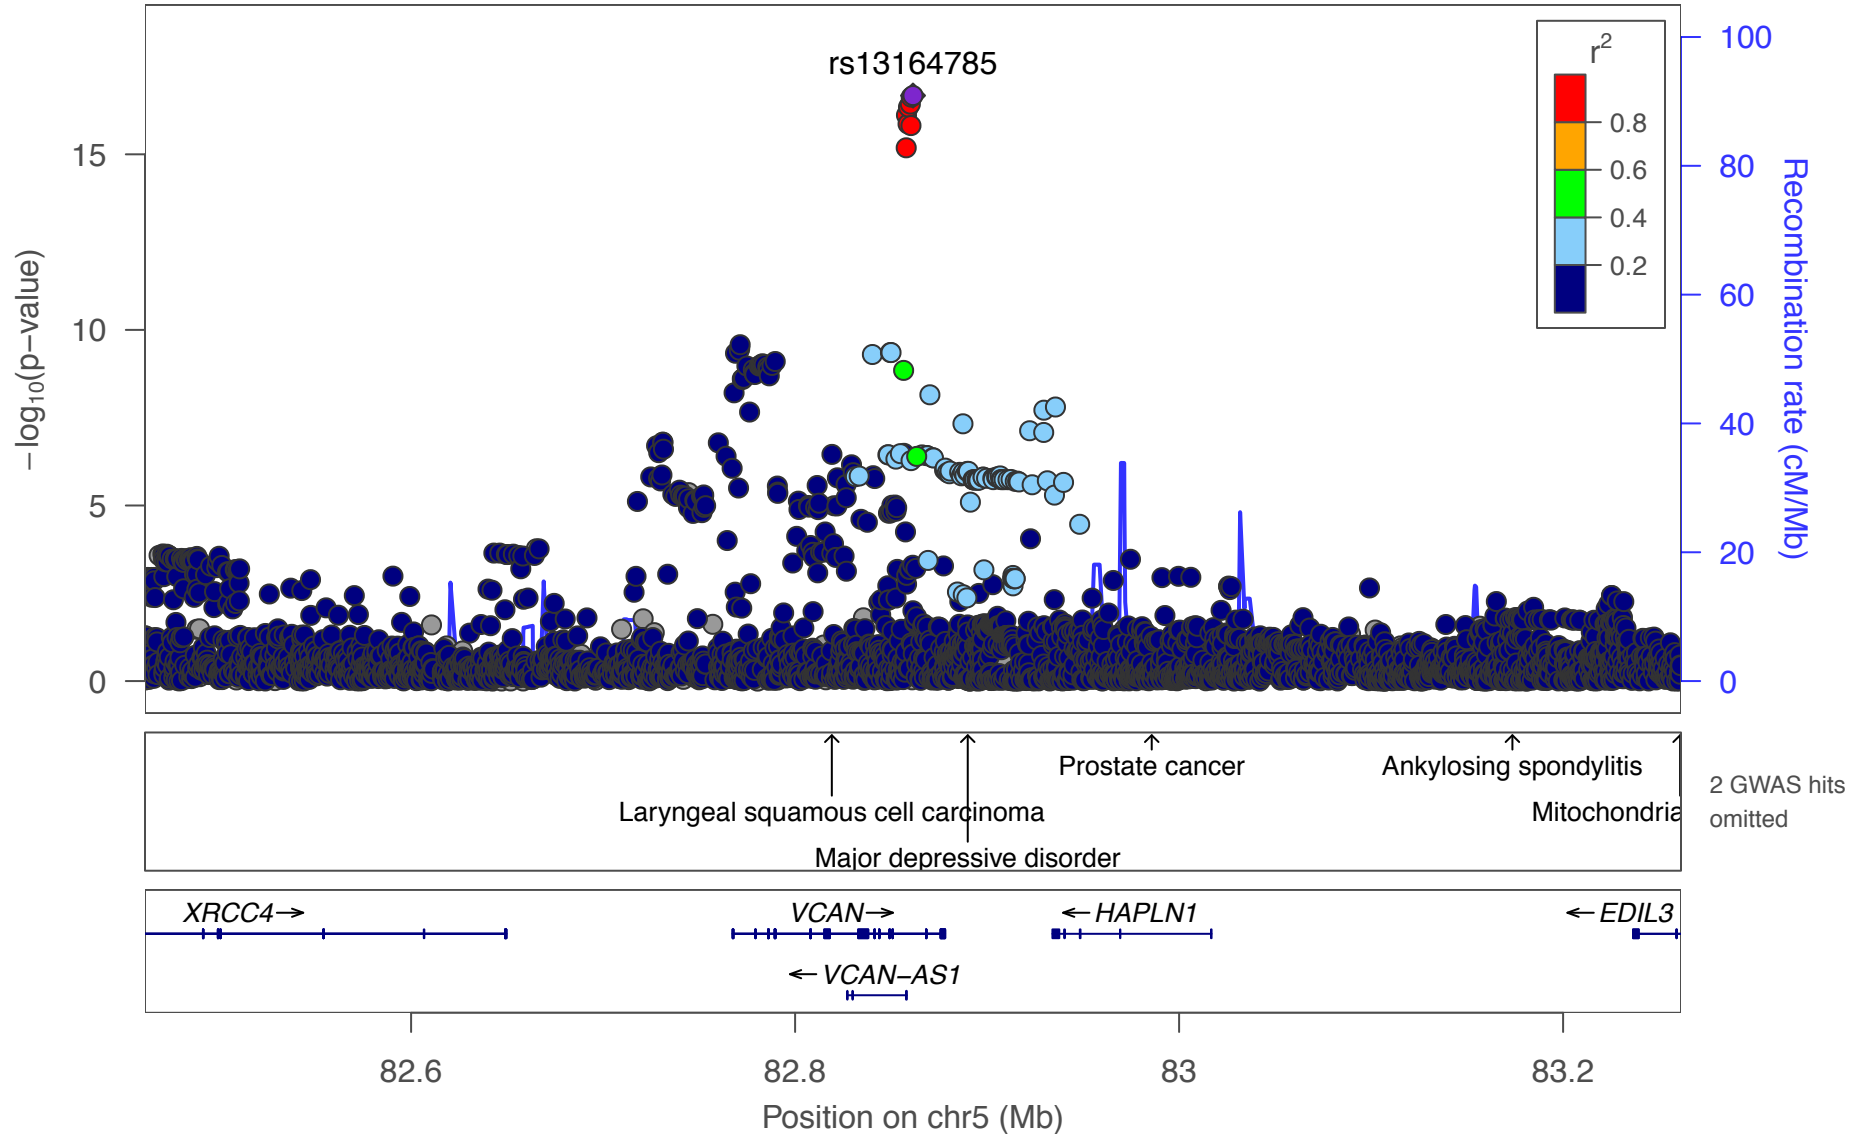



date: Thu Aug 17 17:58:11 2017

build: hg19

display range: chr5:82461400–83261400 [82461400–83261400]

hilite range: 0 – 0 [ 0 – 0 ]

reference SNP: chr5:82861400

number of SNPs plotted: 3396

min P.value: 2.12E–17 [chr5:82861400]

max P.value: 9.99E–1 [chr5:82642418]

omitted GWAS Hits: chr5:83.260938–Mitochondrial DNA levels, NA

## GWAS Catalog SNPs in Region

| <b>chr</b> | <b>pos (Mb)</b> | <b>trait</b>                      | <b>snp</b> |
|------------|-----------------|-----------------------------------|------------|
| 5          | 82.81912        | Laryngeal squamous cell carcinoma | rs310518   |
| 5          | 82.84549        | Diisocyanate-induced asthma       | rs3852186  |
| 5          | 82.88991        | Major depressive disorder         | rs310501   |
| 5          | 82.96073        | Visceral fat                      | rs3846635  |
| 5          | 82.98574        | Prostate cancer                   | rs4466137  |
| 5          | 83.17359        | Ankylosing spondylitis            | rs4552569  |
| 5          | 83.26094        | Mitochondrial DNA levels          | rs2301070  |

# ProtrackX\_FA\_unc\_r

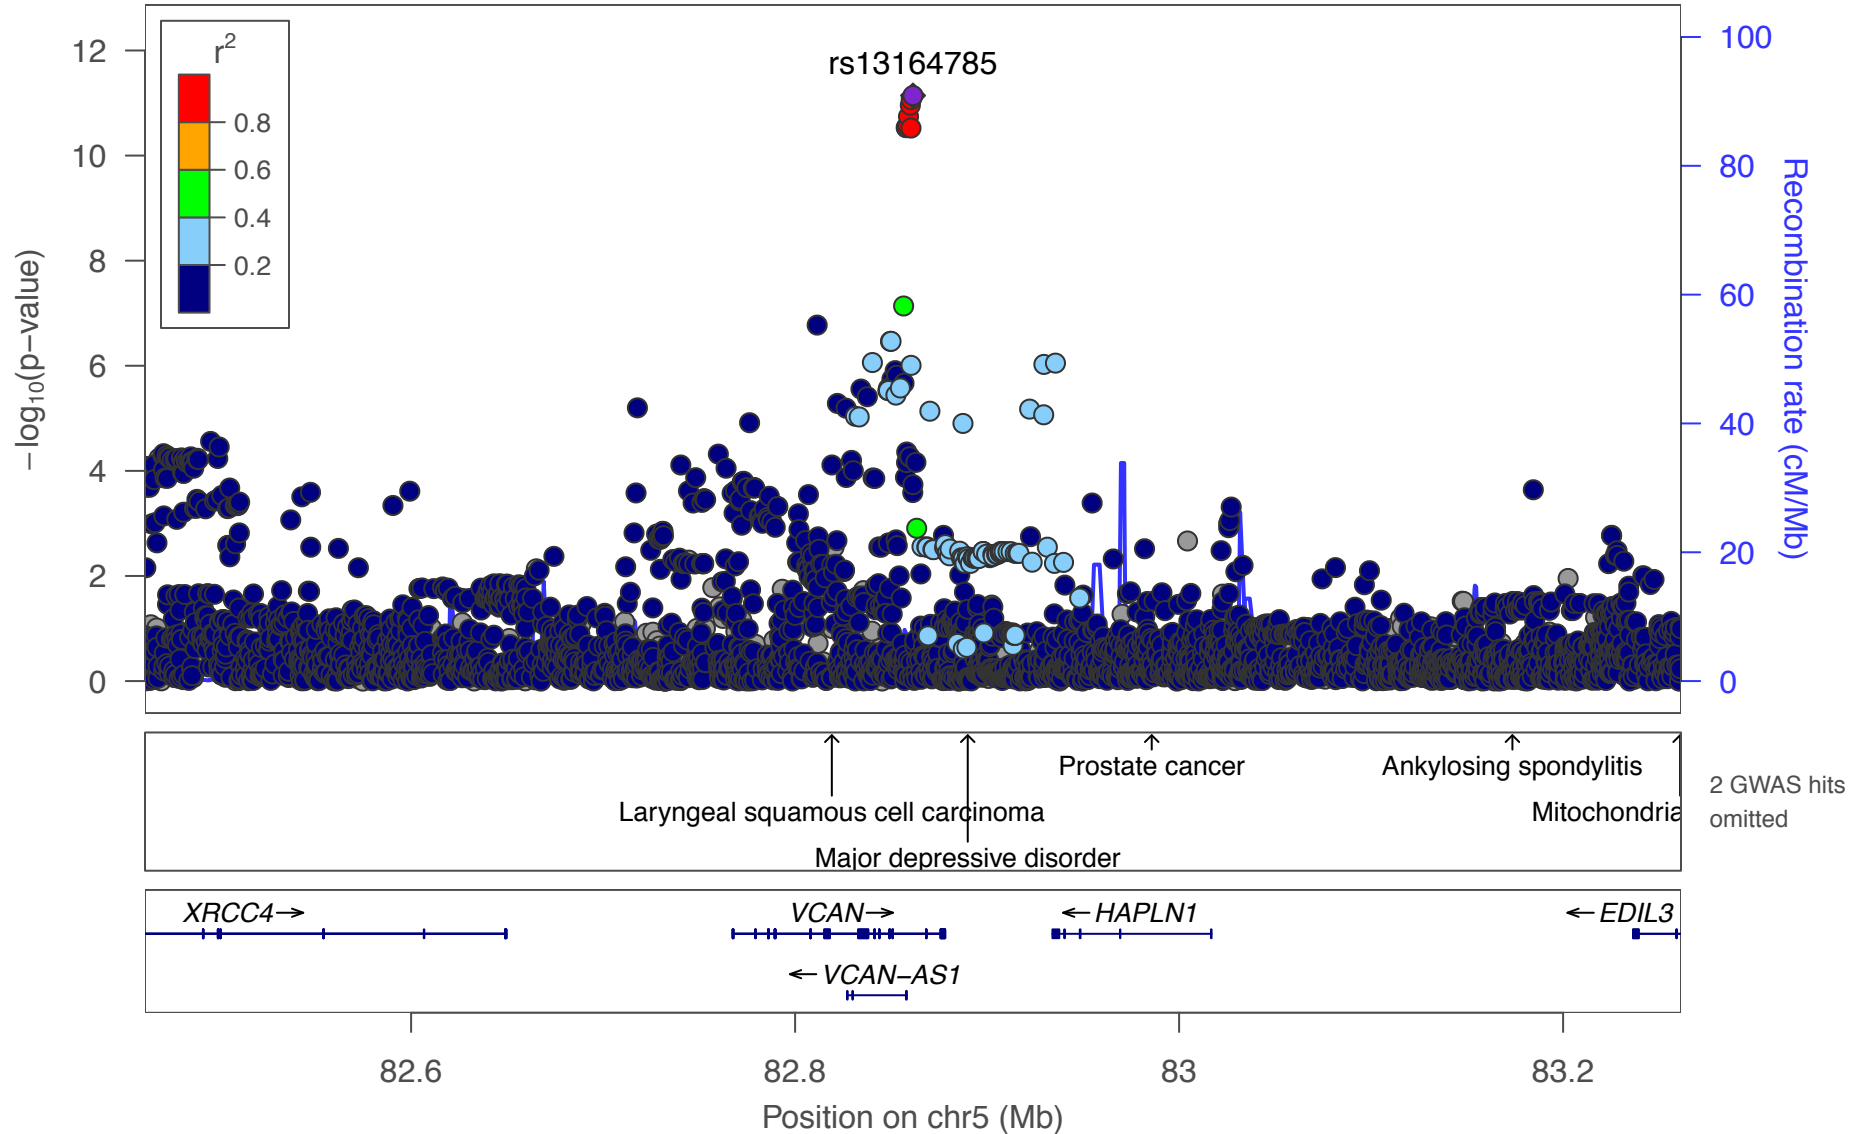

date: Thu Aug 17 17:58:11 2017

build: hg19

display range: chr5:82461400–83261400 [82461400–83261400]

hilite range: 0 – 0 [ 0 – 0 ]

reference SNP: chr5:82861400

number of SNPs plotted: 3396

min P.value: 7.21E–12 [chr5:82861400]

max P.value: 10E–1 [chr5:83260593]

omitted GWAS Hits: chr5:83.260938–Mitochondrial DNA levels, NA

## GWAS Catalog SNPs in Region

| <b>chr</b> | <b>pos (Mb)</b> | <b>trait</b>                      | <b>snp</b> |
|------------|-----------------|-----------------------------------|------------|
| 5          | 82.81912        | Laryngeal squamous cell carcinoma | rs310518   |
| 5          | 82.84549        | Diisocyanate-induced asthma       | rs3852186  |
| 5          | 82.88991        | Major depressive disorder         | rs310501   |
| 5          | 82.96073        | Visceral fat                      | rs3846635  |
| 5          | 82.98574        | Prostate cancer                   | rs4466137  |
| 5          | 83.17359        | Ankylosing spondylitis            | rs4552569  |
| 5          | 83.26094        | Mitochondrial DNA levels          | rs2301070  |

# ProbtrackX\_MD\_atr\_I

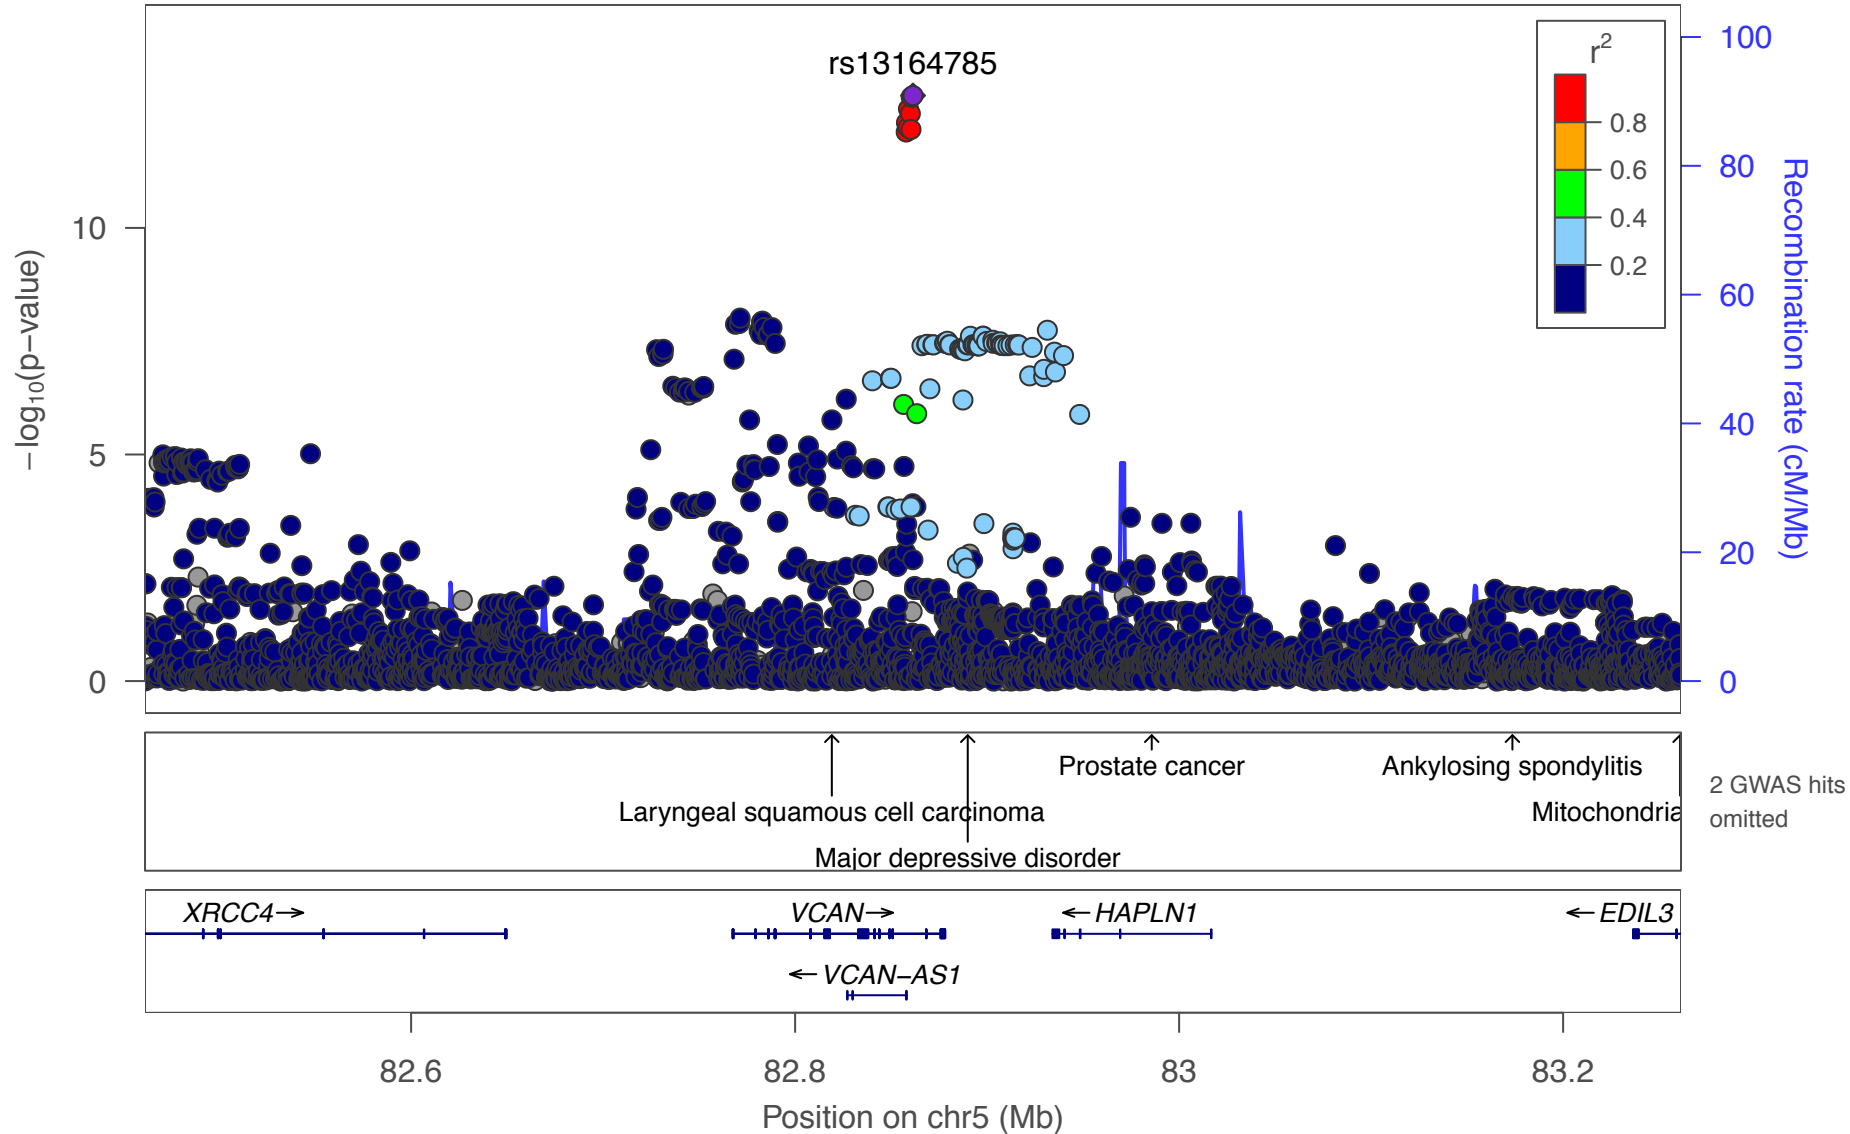

date: Thu Aug 17 17:58:11 2017

build: hg19

display range: chr5:82461400–83261400 [82461400–83261400]

hilite range: 0 – 0 [ 0 – 0 ]

reference SNP: chr5:82861400

number of SNPs plotted: 3396

min P.value: 1.2E–13 [chr5:82861400]

max P.value: 10E–1 [chr5:83165521]

omitted GWAS Hits: chr5:83.260938–Mitochondrial DNA levels, NA

## GWAS Catalog SNPs in Region

| <b>chr</b> | <b>pos (Mb)</b> | <b>trait</b>                      | <b>snp</b> |
|------------|-----------------|-----------------------------------|------------|
| 5          | 82.81912        | Laryngeal squamous cell carcinoma | rs310518   |
| 5          | 82.84549        | Diisocyanate-induced asthma       | rs3852186  |
| 5          | 82.88991        | Major depressive disorder         | rs310501   |
| 5          | 82.96073        | Visceral fat                      | rs3846635  |
| 5          | 82.98574        | Prostate cancer                   | rs4466137  |
| 5          | 83.17359        | Ankylosing spondylitis            | rs4552569  |
| 5          | 83.26094        | Mitochondrial DNA levels          | rs2301070  |



# ProbtrackX\_MD\_atr\_r

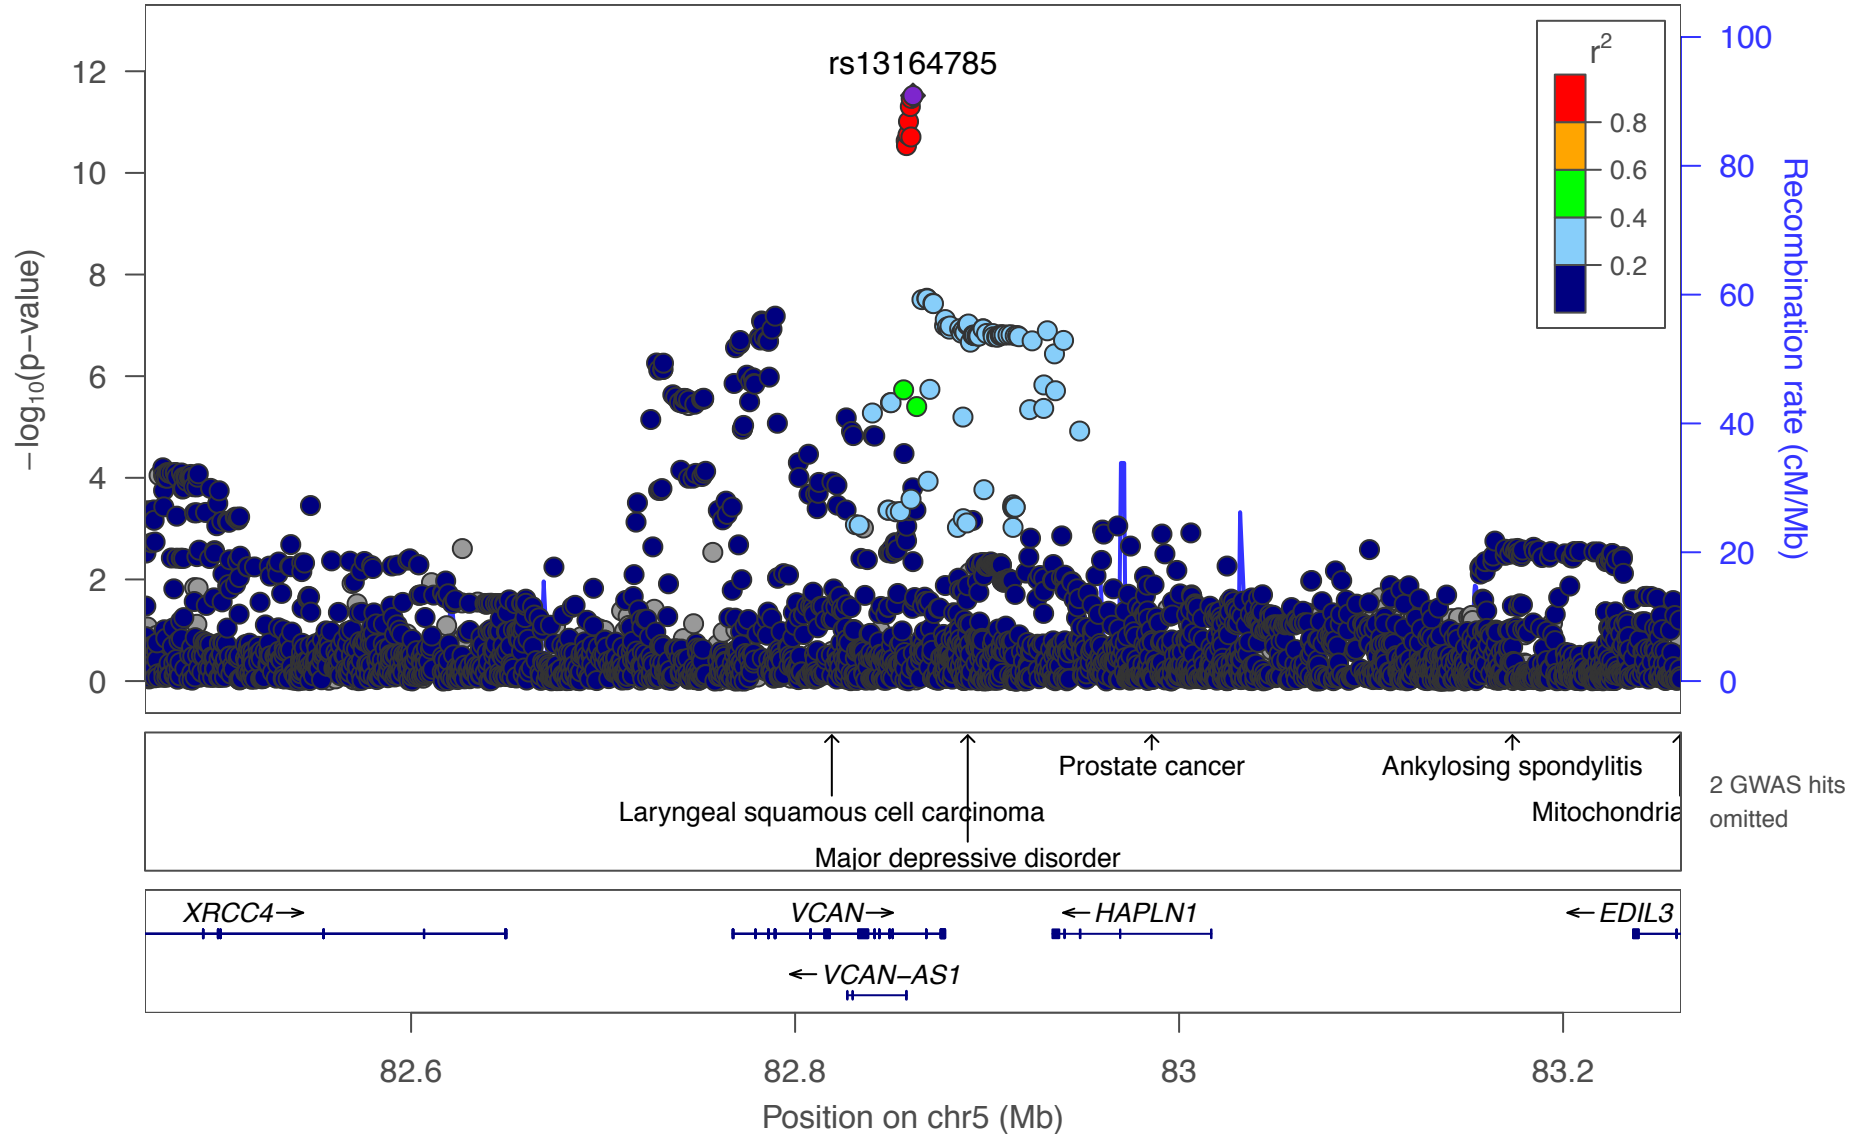

date: Thu Aug 17 17:58:11 2017

build: hg19

display range: chr5:82461400–83261400 [82461400–83261400]

hilite range: 0 – 0 [ 0 – 0 ]

reference SNP: chr5:82861400

number of SNPs plotted: 3396

min P.value: 3.01E–12 [chr5:82861400]

max P.value: 10E–1 [chr5:82773484]

omitted GWAS Hits: chr5:83.260938–Mitochondrial DNA levels, NA

## GWAS Catalog SNPs in Region

| <b>chr</b> | <b>pos (Mb)</b> | <b>trait</b>                      | <b>snp</b> |
|------------|-----------------|-----------------------------------|------------|
| 5          | 82.81912        | Laryngeal squamous cell carcinoma | rs310518   |
| 5          | 82.84549        | Diisocyanate-induced asthma       | rs3852186  |
| 5          | 82.88991        | Major depressive disorder         | rs310501   |
| 5          | 82.96073        | Visceral fat                      | rs3846635  |
| 5          | 82.98574        | Prostate cancer                   | rs4466137  |
| 5          | 83.17359        | Ankylosing spondylitis            | rs4552569  |
| 5          | 83.26094        | Mitochondrial DNA levels          | rs2301070  |

# ProbtrackX\_MD\_cgc\_I

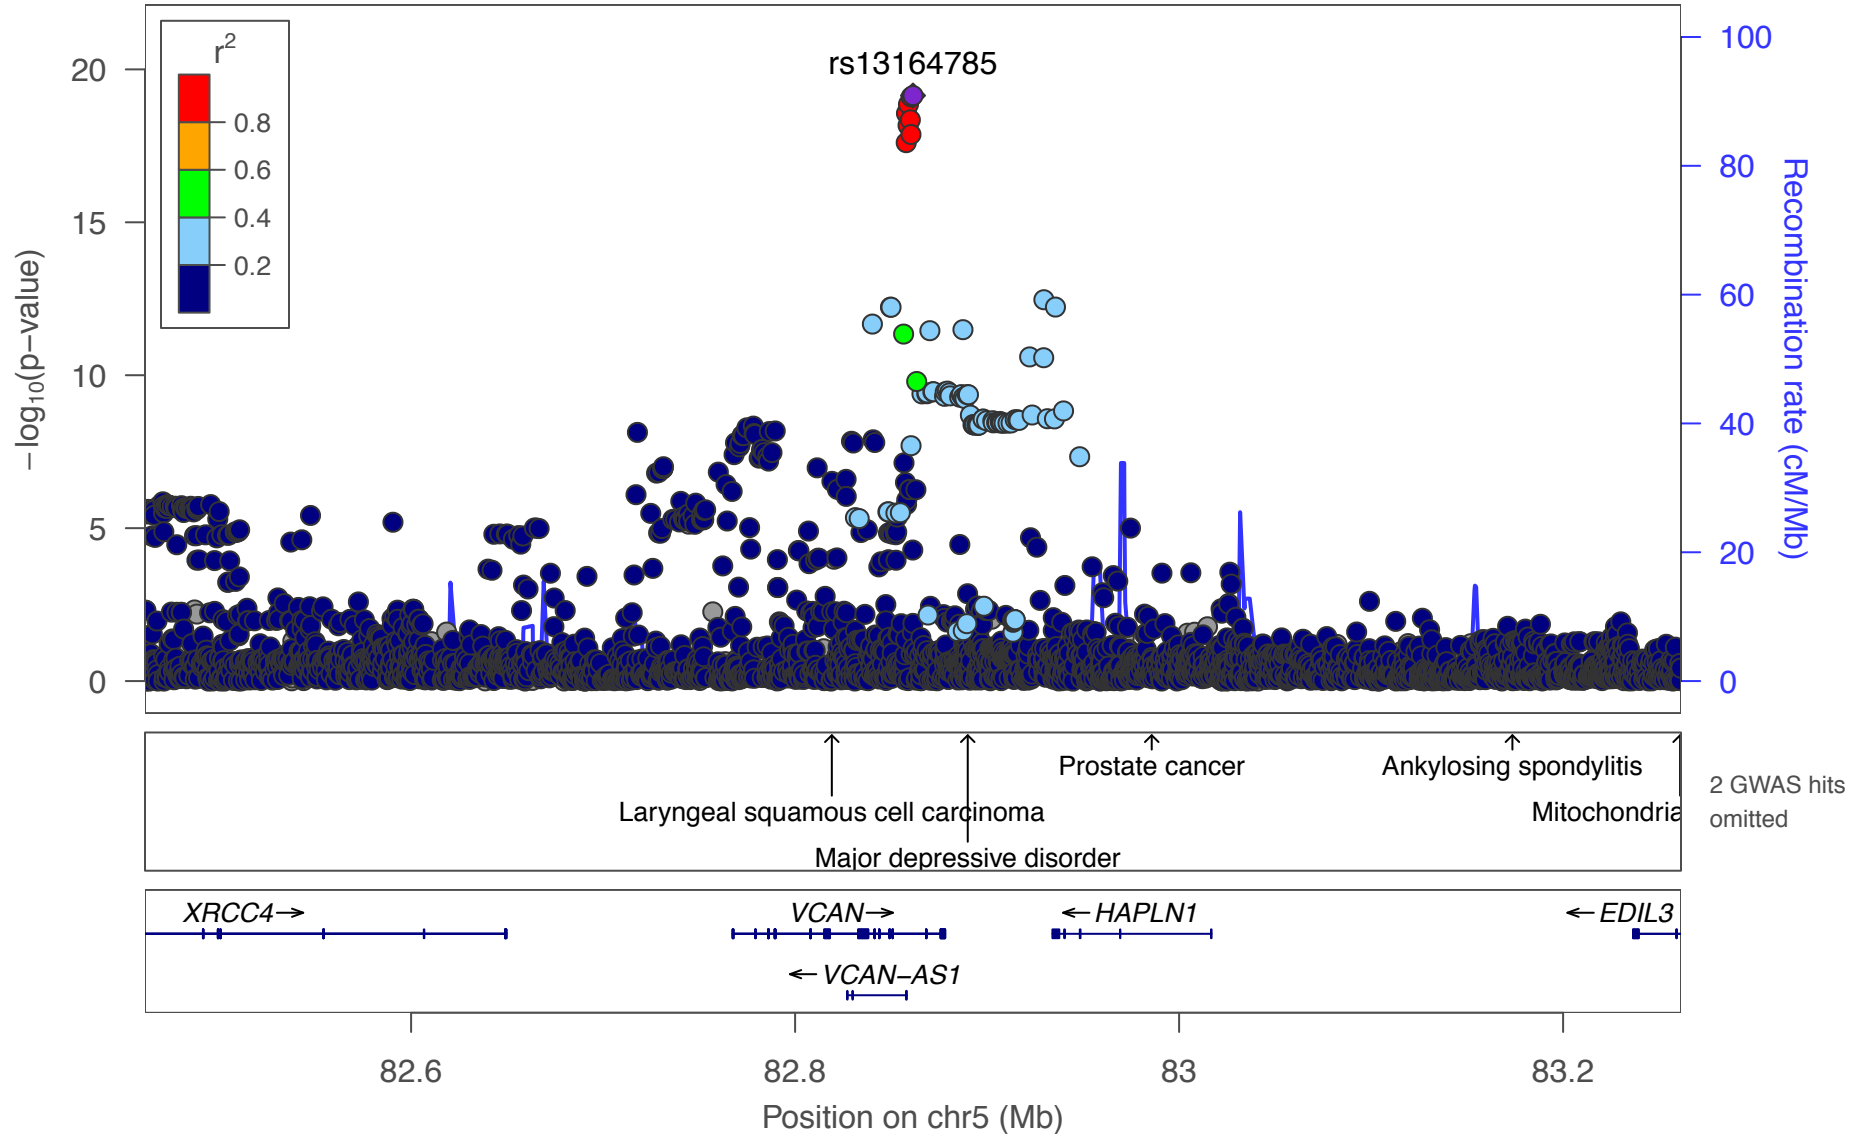

date: Thu Aug 17 17:58:11 2017

build: hg19

display range: chr5:82461400–83261400 [82461400–83261400]

hilite range: 0 – 0 [ 0 – 0 ]

reference SNP: chr5:82861400

number of SNPs plotted: 3396

min P.value: 7.18E–20 [chr5:82861400]

max P.value: 10E–1 [chr5:82958821]

omitted GWAS Hits: chr5:83.260938–Mitochondrial DNA levels, NA

## GWAS Catalog SNPs in Region

| <b>chr</b> | <b>pos (Mb)</b> | <b>trait</b>                      | <b>snp</b> |
|------------|-----------------|-----------------------------------|------------|
| 5          | 82.81912        | Laryngeal squamous cell carcinoma | rs310518   |
| 5          | 82.84549        | Diisocyanate-induced asthma       | rs3852186  |
| 5          | 82.88991        | Major depressive disorder         | rs310501   |
| 5          | 82.96073        | Visceral fat                      | rs3846635  |
| 5          | 82.98574        | Prostate cancer                   | rs4466137  |
| 5          | 83.17359        | Ankylosing spondylitis            | rs4552569  |
| 5          | 83.26094        | Mitochondrial DNA levels          | rs2301070  |

# ProbtrackX\_MD\_fmi

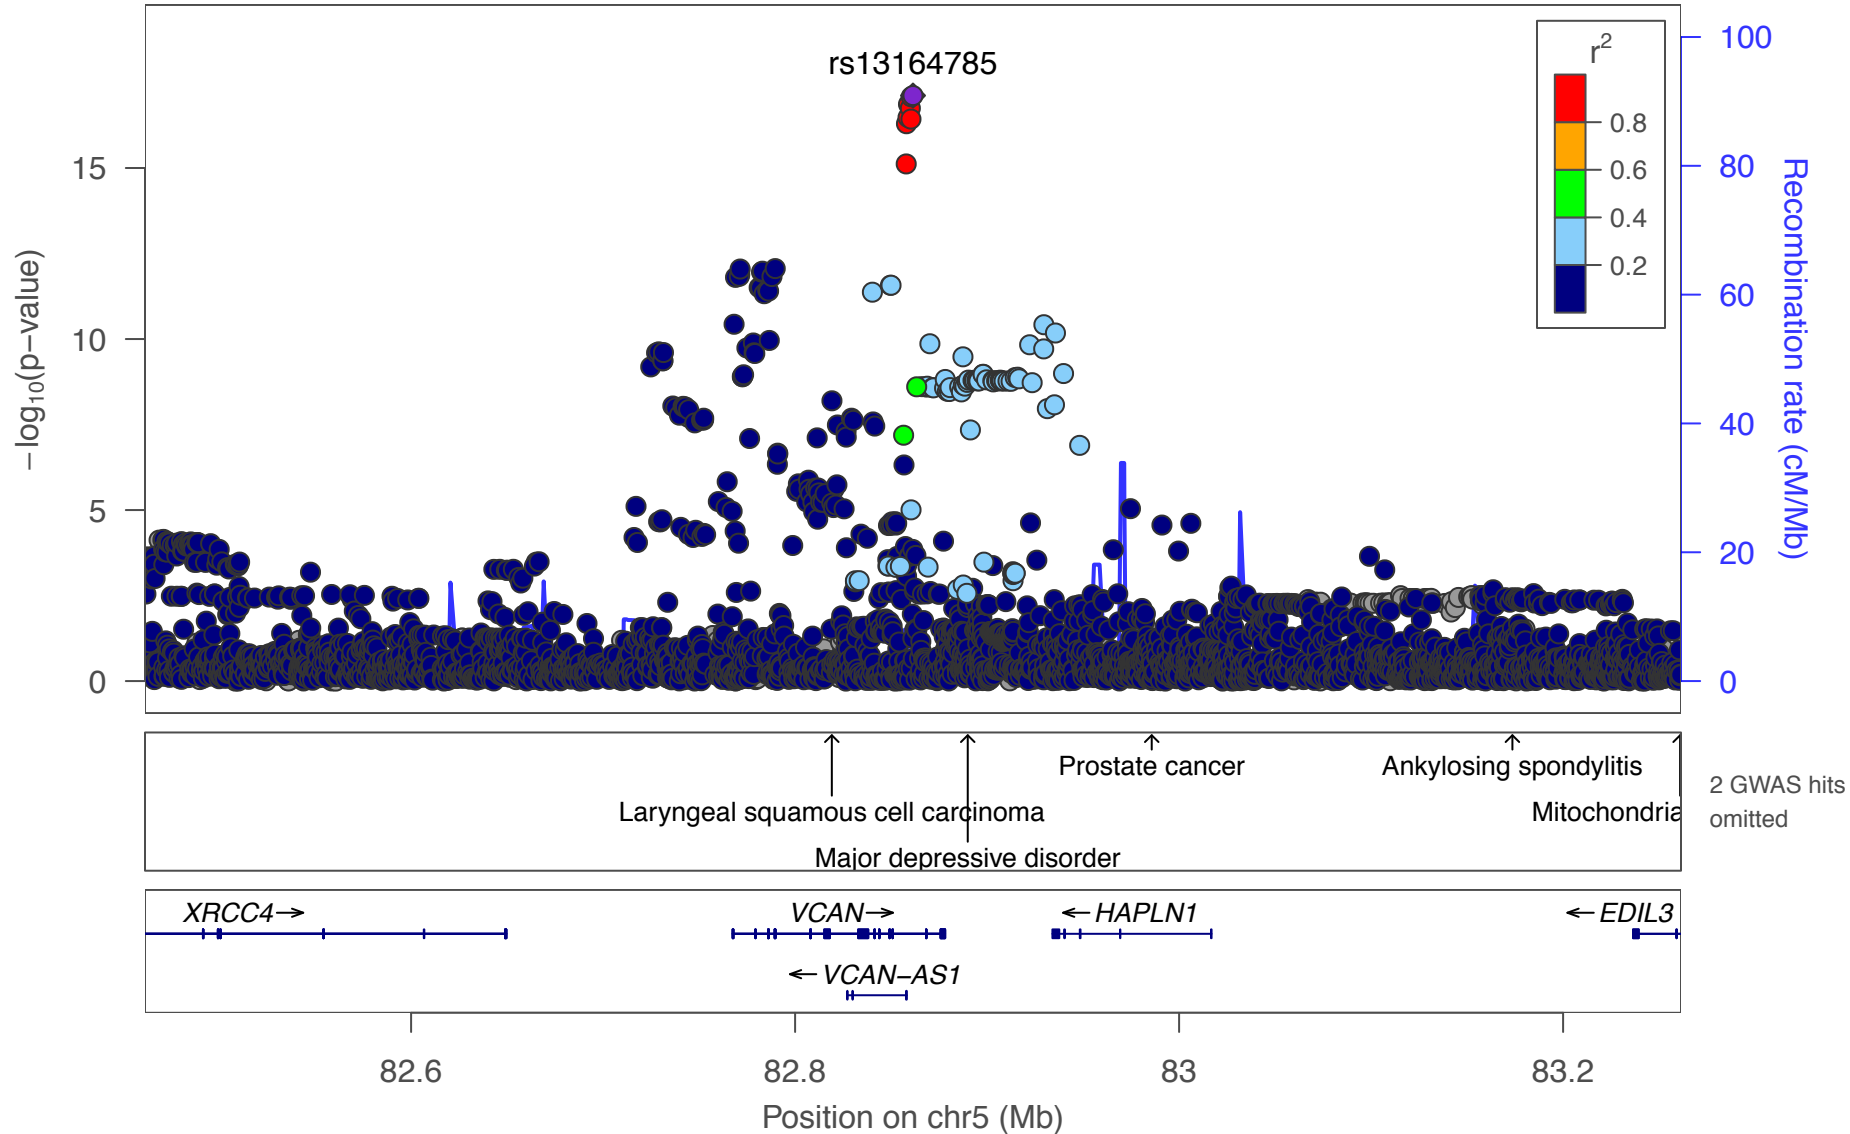

date: Thu Aug 17 17:58:11 2017

build: hg19

display range: chr5:82461400–83261400 [82461400–83261400]

hilite range: 0 – 0 [ 0 – 0 ]

reference SNP: chr5:82861400

number of SNPs plotted: 3396

min P.value: 7.62E–18 [chr5:82861400]

max P.value: 10E–1 [chr5:82826483]

omitted GWAS Hits: chr5:83.260938–Mitochondrial DNA levels, NA



## GWAS Catalog SNPs in Region

| <b>chr</b> | <b>pos (Mb)</b> | <b>trait</b>                      | <b>snp</b> |
|------------|-----------------|-----------------------------------|------------|
| 5          | 82.81912        | Laryngeal squamous cell carcinoma | rs310518   |
| 5          | 82.84549        | Diisocyanate-induced asthma       | rs3852186  |
| 5          | 82.88991        | Major depressive disorder         | rs310501   |
| 5          | 82.96073        | Visceral fat                      | rs3846635  |
| 5          | 82.98574        | Prostate cancer                   | rs4466137  |
| 5          | 83.17359        | Ankylosing spondylitis            | rs4552569  |
| 5          | 83.26094        | Mitochondrial DNA levels          | rs2301070  |

# ProbtrackX\_MD\_ptr\_I

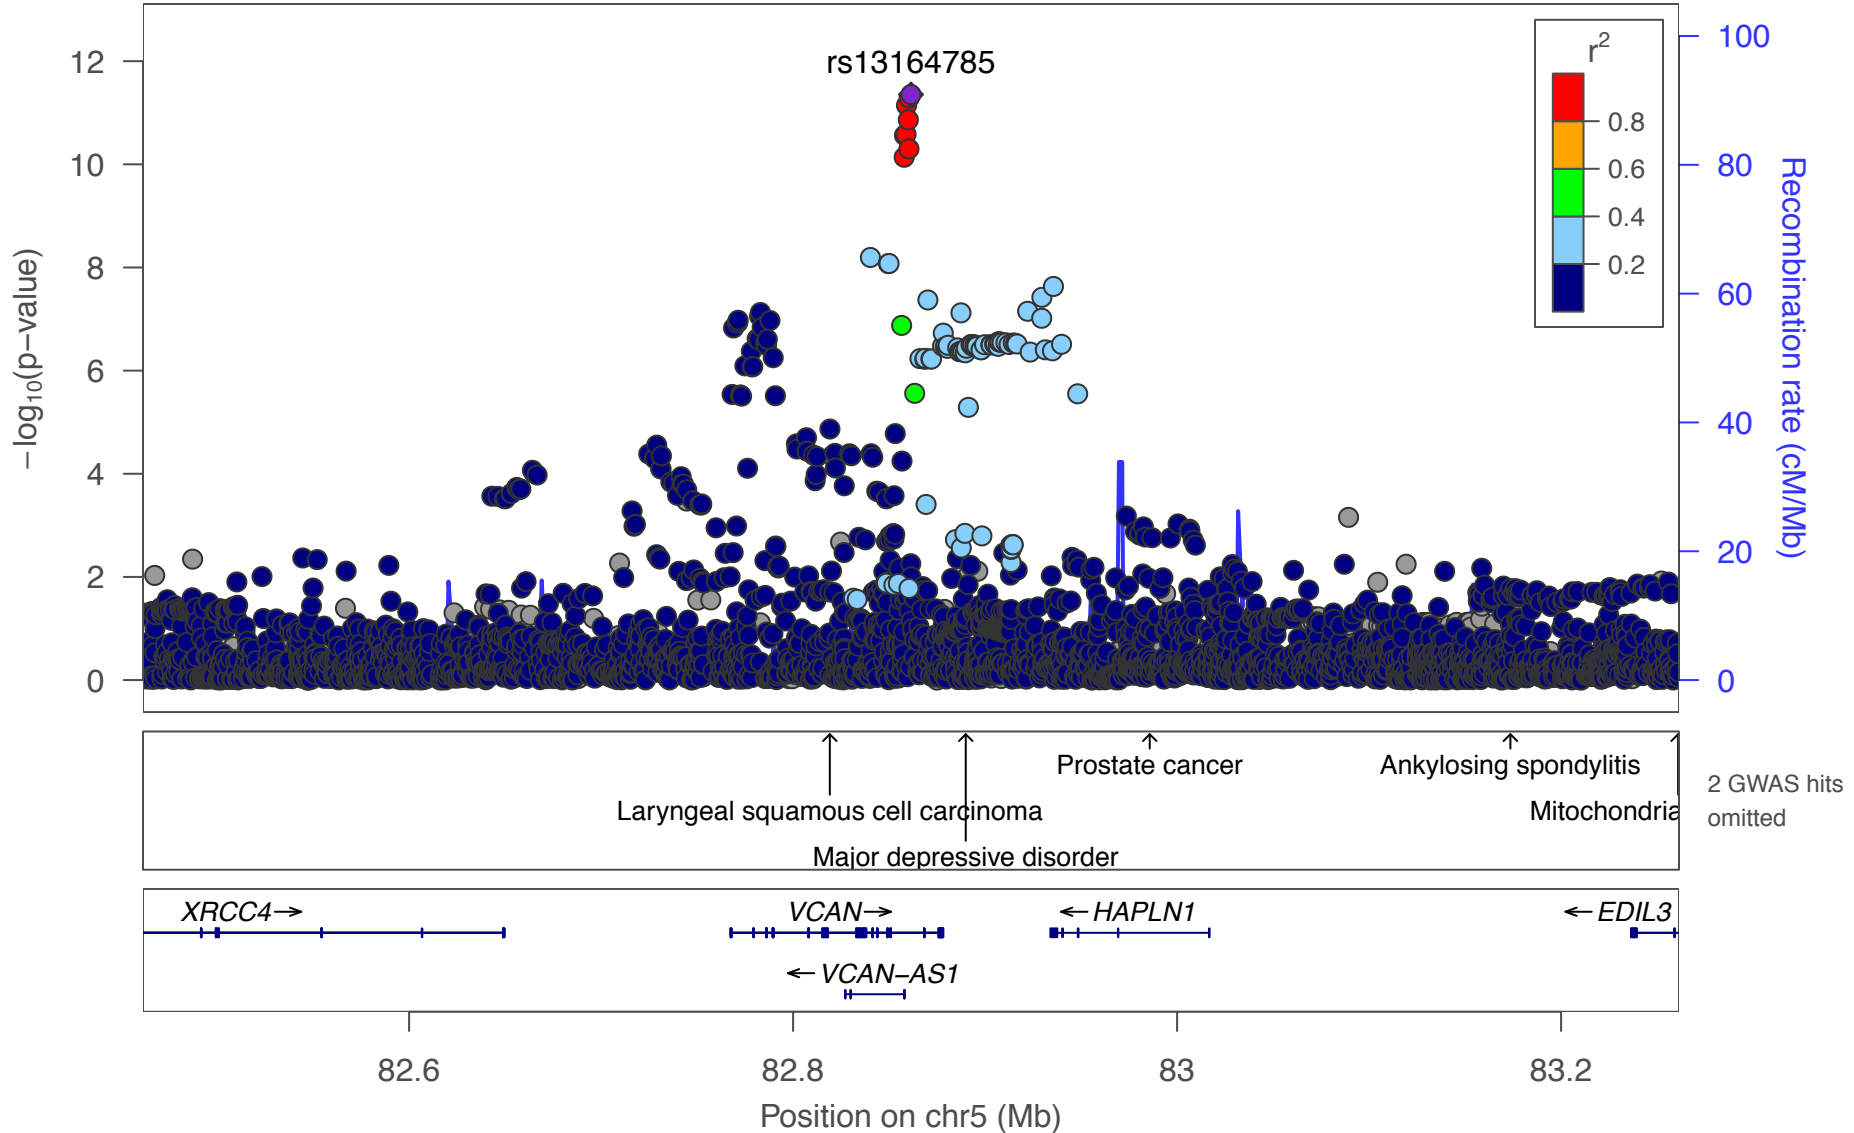

date: Thu Aug 17 17:58:11 2017

build: hg19

display range: chr5:82461400–83261400 [82461400–83261400]

hilite range: 0 – 0 [ 0 – 0 ]

reference SNP: chr5:82861400

number of SNPs plotted: 3396

min P.value: 4.44E–12 [chr5:82861400]

max P.value: 9.99E–1 [chr5:82874942]

omitted GWAS Hits: chr5:83.260938–Mitochondrial DNA levels, NA

## GWAS Catalog SNPs in Region

| <b>chr</b> | <b>pos (Mb)</b> | <b>trait</b>                      | <b>snp</b> |
|------------|-----------------|-----------------------------------|------------|
| 5          | 82.81912        | Laryngeal squamous cell carcinoma | rs310518   |
| 5          | 82.84549        | Diisocyanate-induced asthma       | rs3852186  |
| 5          | 82.88991        | Major depressive disorder         | rs310501   |
| 5          | 82.96073        | Visceral fat                      | rs3846635  |
| 5          | 82.98574        | Prostate cancer                   | rs4466137  |
| 5          | 83.17359        | Ankylosing spondylitis            | rs4552569  |
| 5          | 83.26094        | Mitochondrial DNA levels          | rs2301070  |

# ProbtrackX\_MD\_ptr\_r

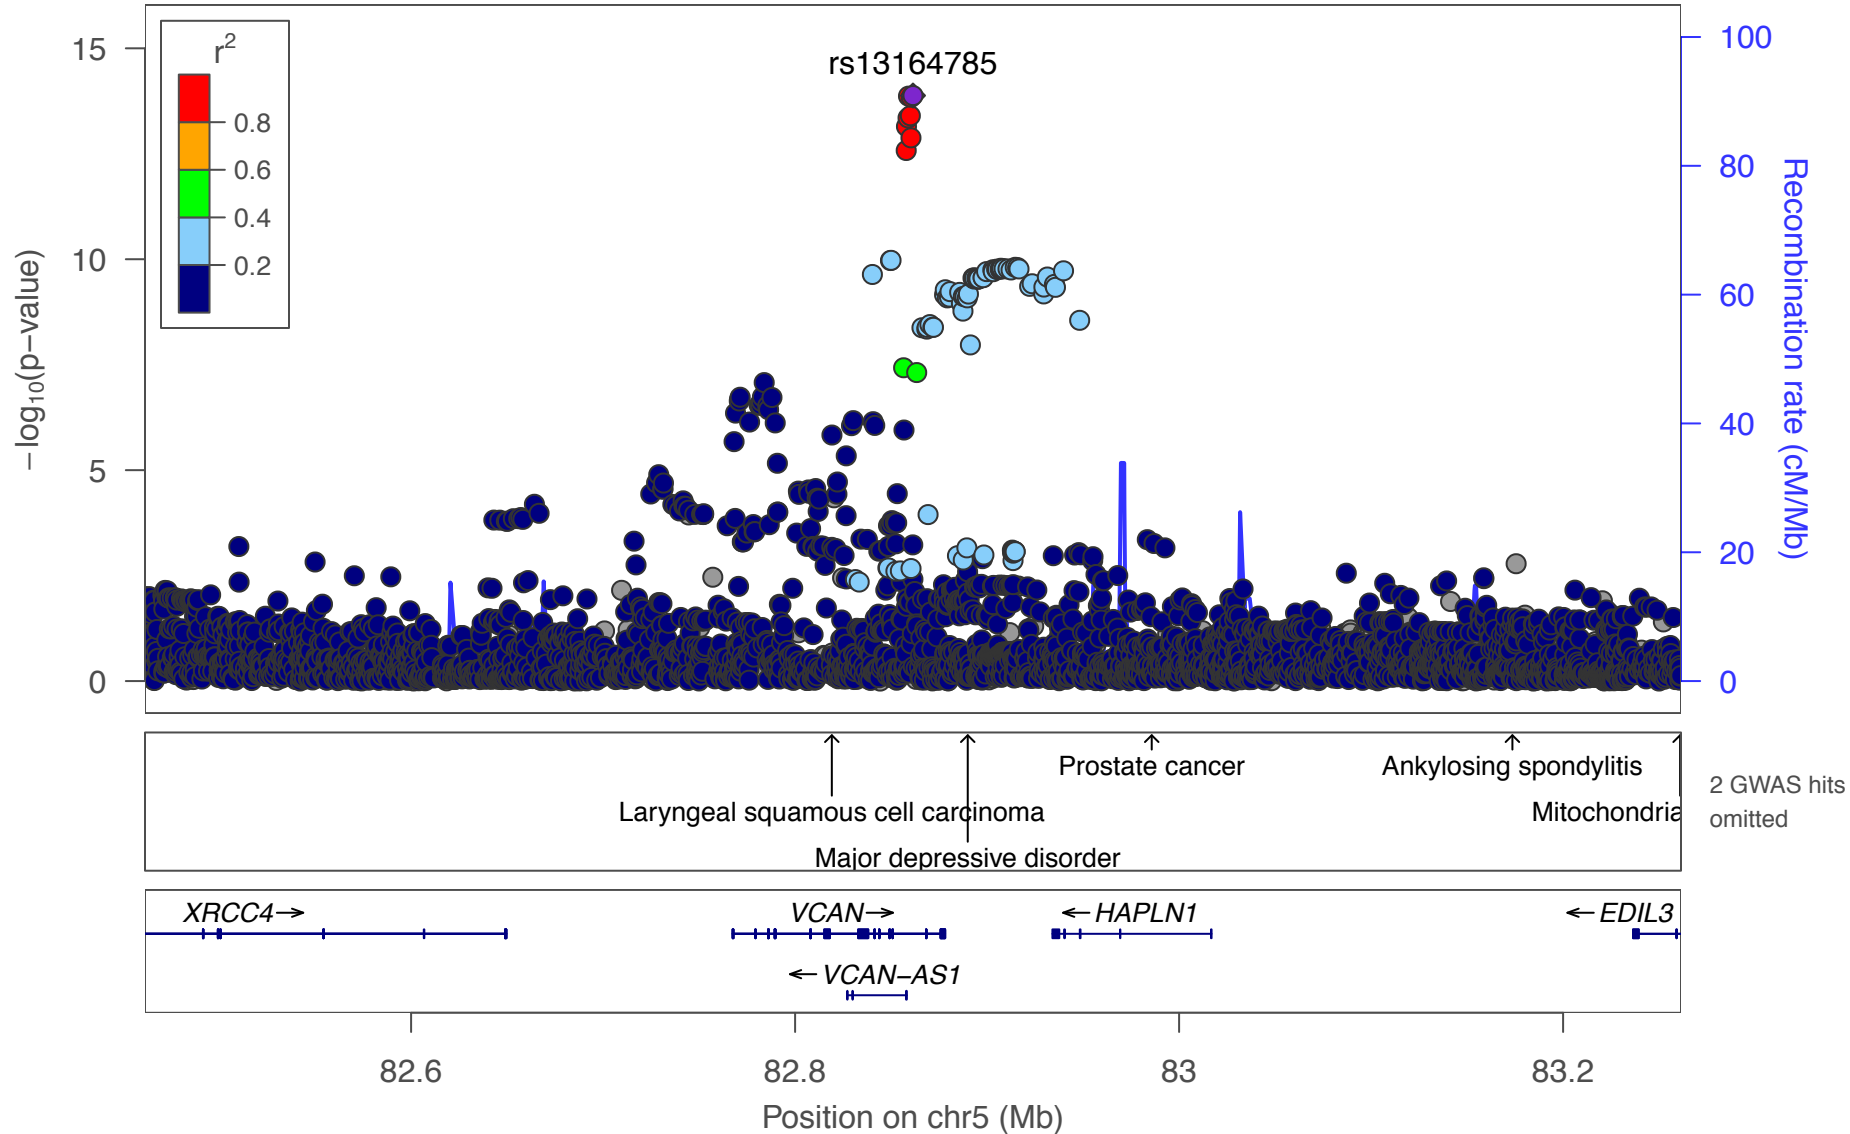

date: Thu Aug 17 17:58:11 2017

build: hg19

display range: chr5:82461400–83261400 [82461400–83261400]

hilite range: 0 – 0 [ 0 – 0 ]

reference SNP: chr5:82861400

number of SNPs plotted: 3396

min P.value: 1.32E–14 [chr5:82861400]

max P.value: 9.99E–1 [chr5:83184551]

omitted GWAS Hits: chr5:83.260938–Mitochondrial DNA levels, NA

## GWAS Catalog SNPs in Region

| <b>chr</b> | <b>pos (Mb)</b> | <b>trait</b>                      | <b>snp</b> |
|------------|-----------------|-----------------------------------|------------|
| 5          | 82.81912        | Laryngeal squamous cell carcinoma | rs310518   |
| 5          | 82.84549        | Diisocyanate-induced asthma       | rs3852186  |
| 5          | 82.88991        | Major depressive disorder         | rs310501   |
| 5          | 82.96073        | Visceral fat                      | rs3846635  |
| 5          | 82.98574        | Prostate cancer                   | rs4466137  |
| 5          | 83.17359        | Ankylosing spondylitis            | rs4552569  |
| 5          | 83.26094        | Mitochondrial DNA levels          | rs2301070  |

# ProbtrackX\_MD\_slf\_I

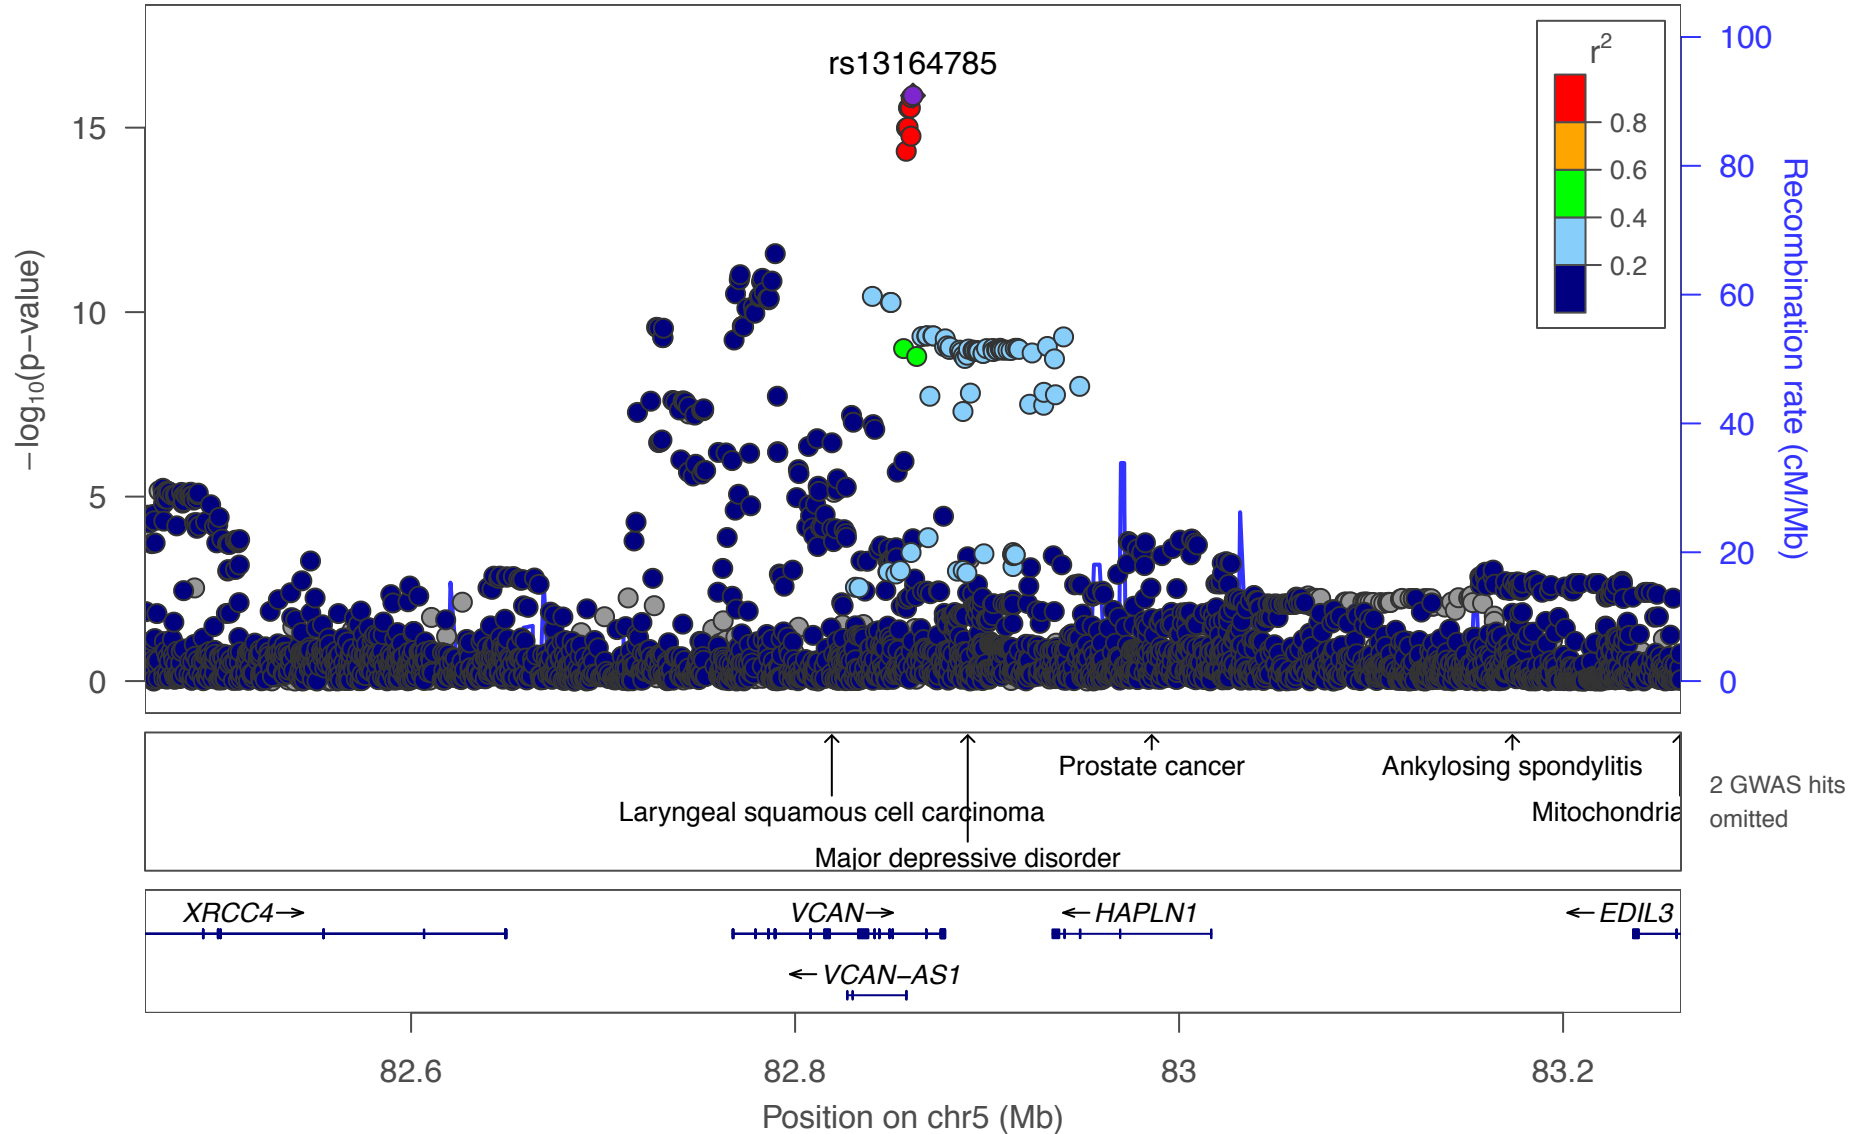



date: Thu Aug 17 17:58:11 2017

build: hg19

display range: chr5:82461400–83261400 [82461400–83261400]

hilite range: 0 – 0 [ 0 – 0 ]

reference SNP: chr5:82861400

number of SNPs plotted: 3396

min P.value: 1.35E–16 [chr5:82861400]

max P.value: 10E–1 [chr5:83080322]

omitted GWAS Hits: chr5:83.260938–Mitochondrial DNA levels, NA

## GWAS Catalog SNPs in Region

| <b>chr</b> | <b>pos (Mb)</b> | <b>trait</b>                      | <b>snp</b> |
|------------|-----------------|-----------------------------------|------------|
| 5          | 82.81912        | Laryngeal squamous cell carcinoma | rs310518   |
| 5          | 82.84549        | Diisocyanate-induced asthma       | rs3852186  |
| 5          | 82.88991        | Major depressive disorder         | rs310501   |
| 5          | 82.96073        | Visceral fat                      | rs3846635  |
| 5          | 82.98574        | Prostate cancer                   | rs4466137  |
| 5          | 83.17359        | Ankylosing spondylitis            | rs4552569  |
| 5          | 83.26094        | Mitochondrial DNA levels          | rs2301070  |

# ProbtrackX\_MD\_unc\_I

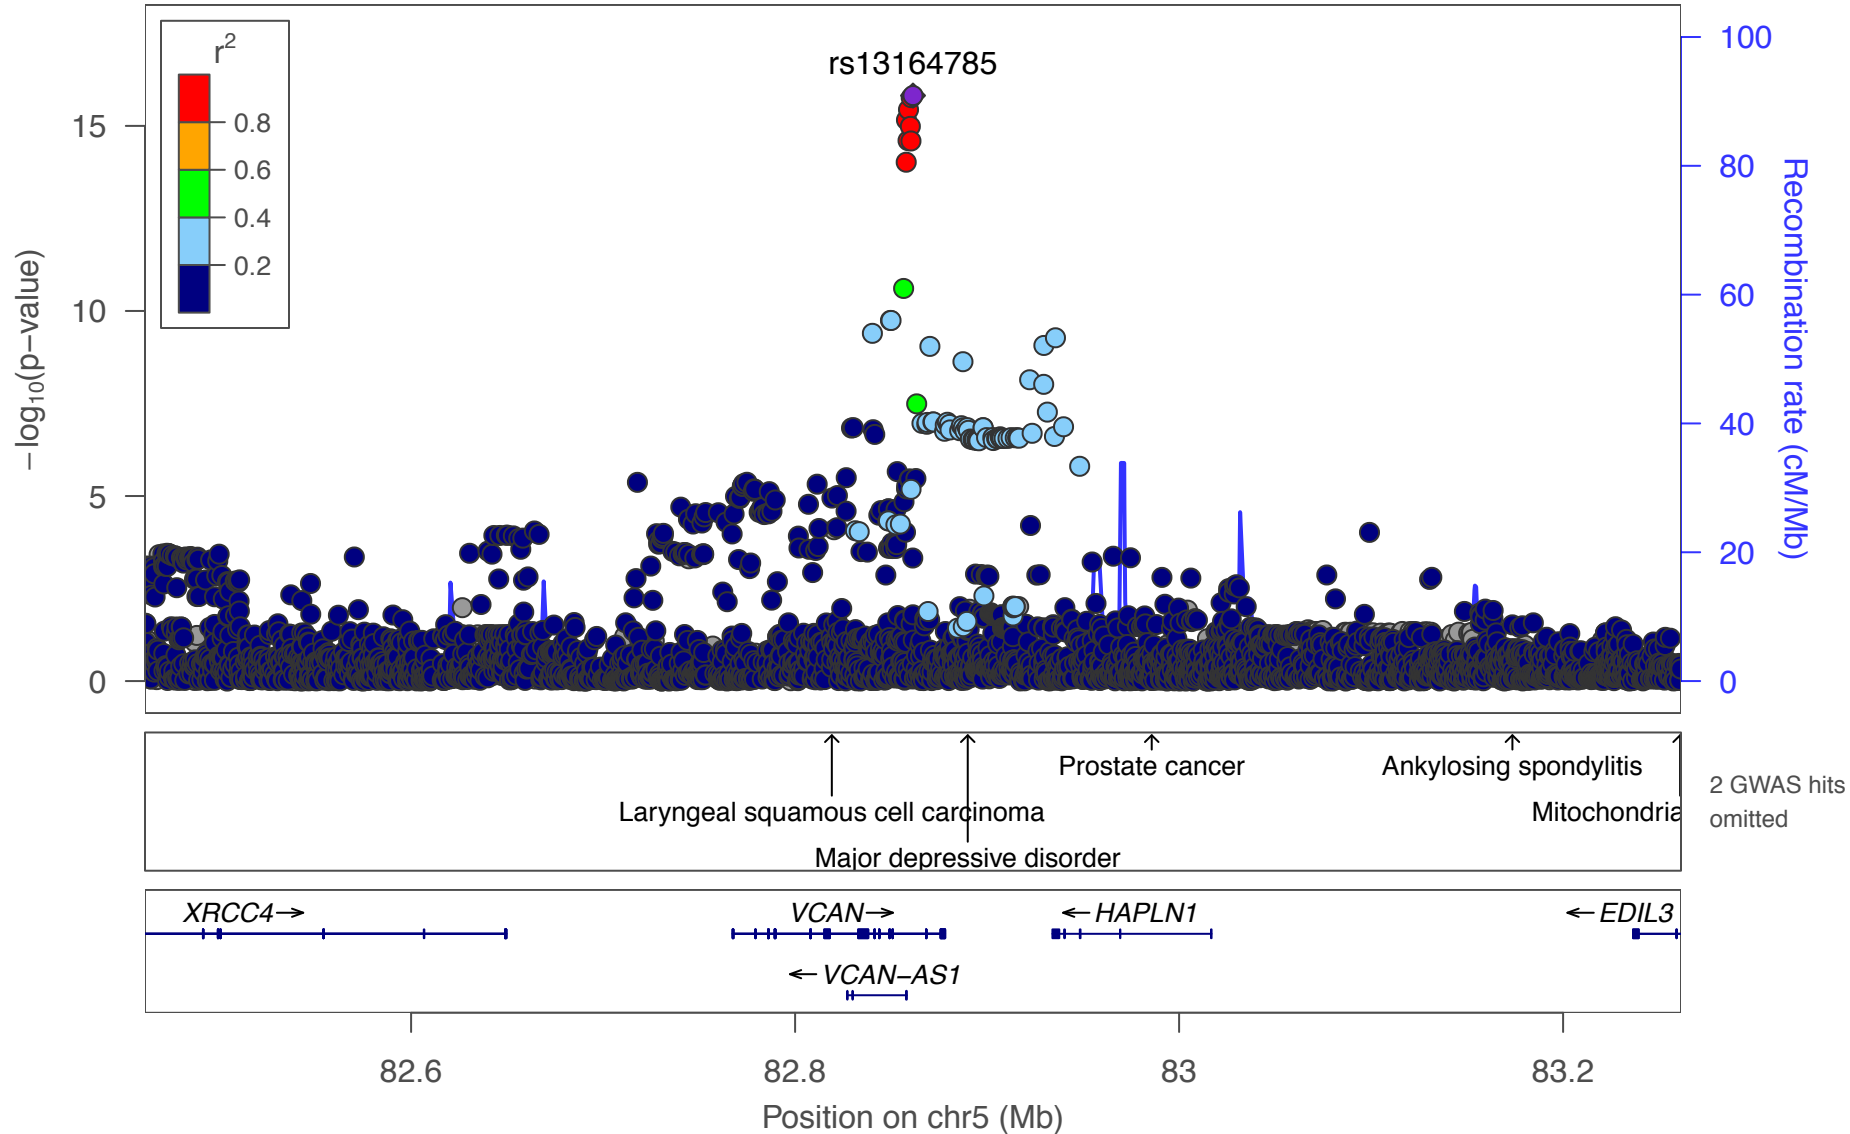

date: Thu Aug 17 17:58:11 2017

build: hg19

display range: chr5:82461400–83261400 [82461400–83261400]

hilite range: 0 – 0 [ 0 – 0 ]

reference SNP: chr5:82861400

number of SNPs plotted: 3396

min P.value: 1.51E–16 [chr5:82861400]

max P.value: 10E–1 [chr5:82730532]

omitted GWAS Hits: chr5:83.260938–Mitochondrial DNA levels, NA

## GWAS Catalog SNPs in Region

| <b>chr</b> | <b>pos (Mb)</b> | <b>trait</b>                      | <b>snp</b> |
|------------|-----------------|-----------------------------------|------------|
| 5          | 82.81912        | Laryngeal squamous cell carcinoma | rs310518   |
| 5          | 82.84549        | Diisocyanate-induced asthma       | rs3852186  |
| 5          | 82.88991        | Major depressive disorder         | rs310501   |
| 5          | 82.96073        | Visceral fat                      | rs3846635  |
| 5          | 82.98574        | Prostate cancer                   | rs4466137  |
| 5          | 83.17359        | Ankylosing spondylitis            | rs4552569  |
| 5          | 83.26094        | Mitochondrial DNA levels          | rs2301070  |

# ProbtrackX\_MD\_unc\_r

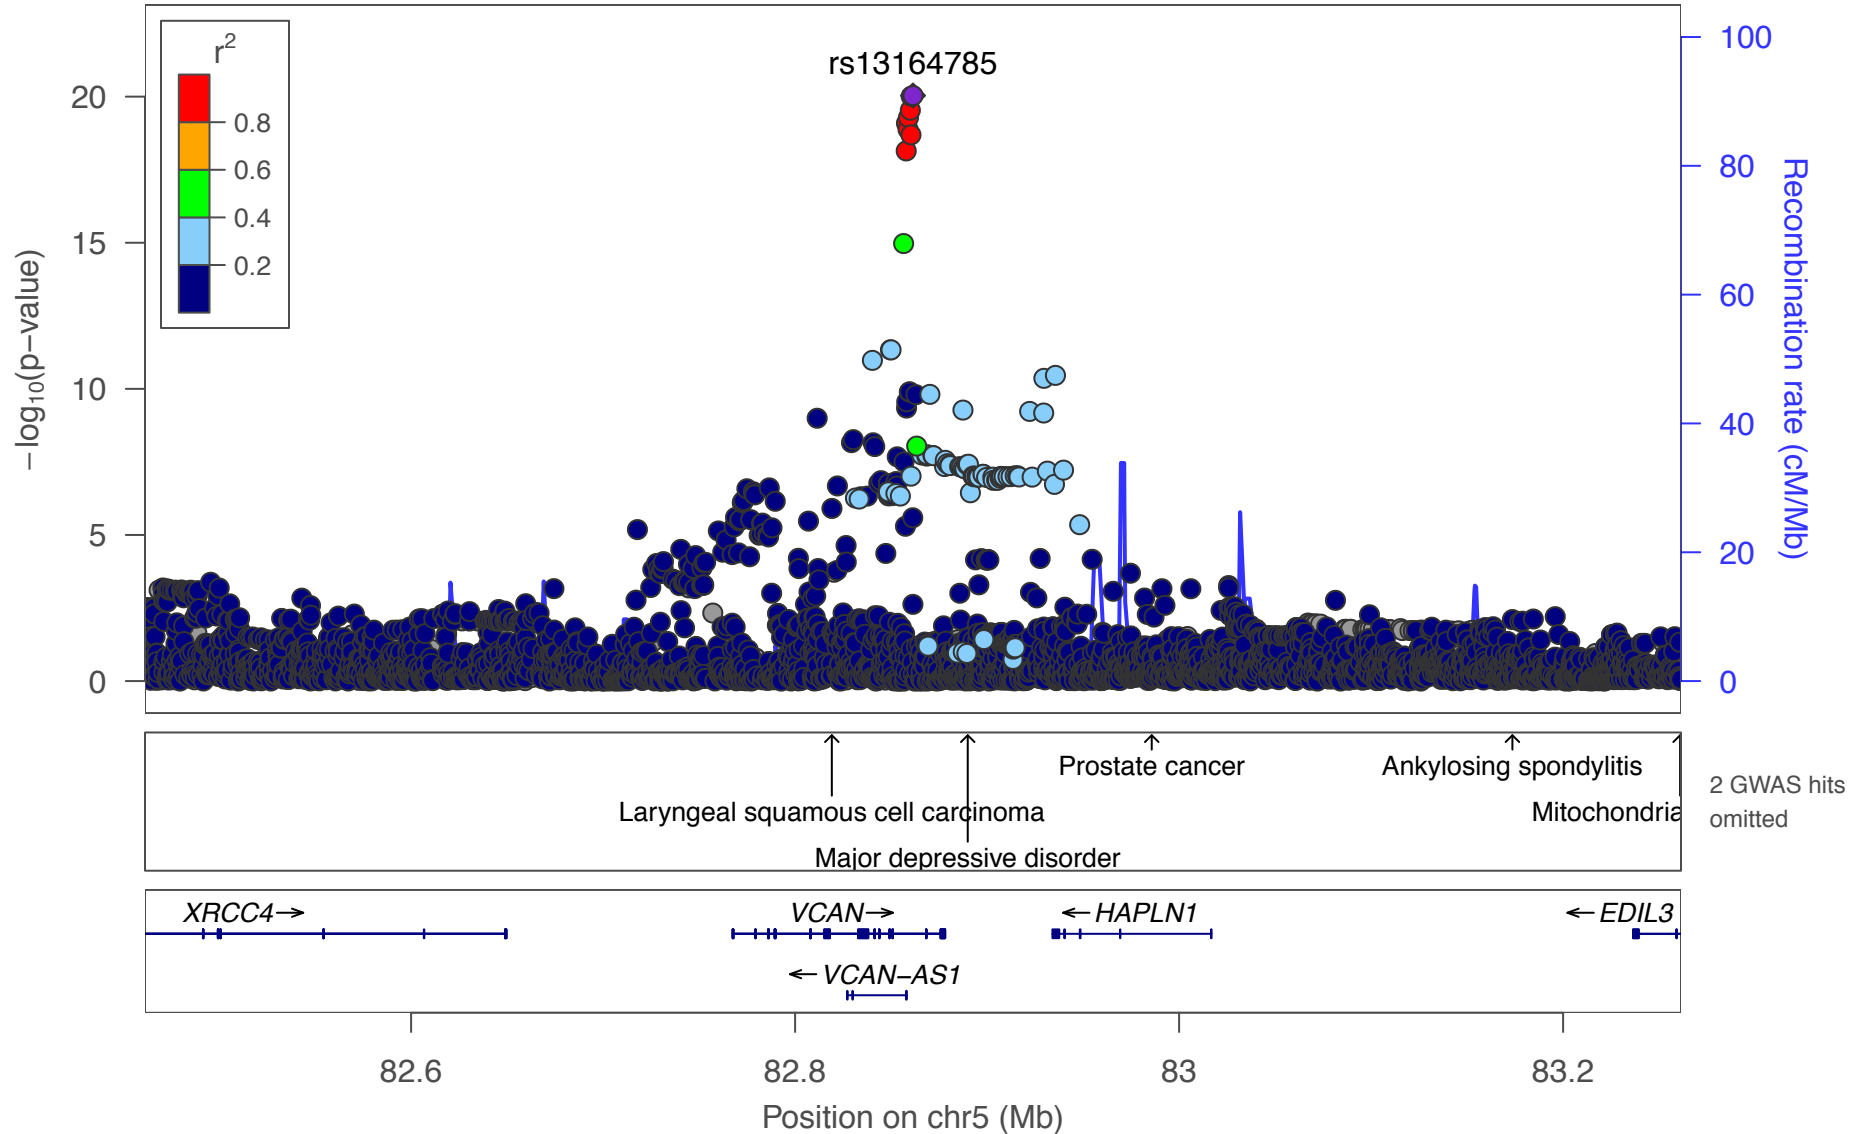

date: Thu Aug 17 17:58:11 2017

build: hg19

display range: chr5:82461400–83261400 [82461400–83261400]

hilite range: 0 – 0 [ 0 – 0 ]

reference SNP: chr5:82861400

number of SNPs plotted: 3396

min P.value: 9.18E–21 [chr5:82861400]

max P.value: 10E–1 [chr5:82733693]

omitted GWAS Hits: chr5:83.260938–Mitochondrial DNA levels, NA

## GWAS Catalog SNPs in Region

| <b>chr</b> | <b>pos (Mb)</b> | <b>trait</b>                      | <b>snp</b> |
|------------|-----------------|-----------------------------------|------------|
| 5          | 82.81912        | Laryngeal squamous cell carcinoma | rs310518   |
| 5          | 82.84549        | Diisocyanate-induced asthma       | rs3852186  |
| 5          | 82.88991        | Major depressive disorder         | rs310501   |
| 5          | 82.96073        | Visceral fat                      | rs3846635  |
| 5          | 82.98574        | Prostate cancer                   | rs4466137  |
| 5          | 83.17359        | Ankylosing spondylitis            | rs4552569  |
| 5          | 83.26094        | Mitochondrial DNA levels          | rs2301070  |



# ProbtrackX\_L1\_ifo\_r

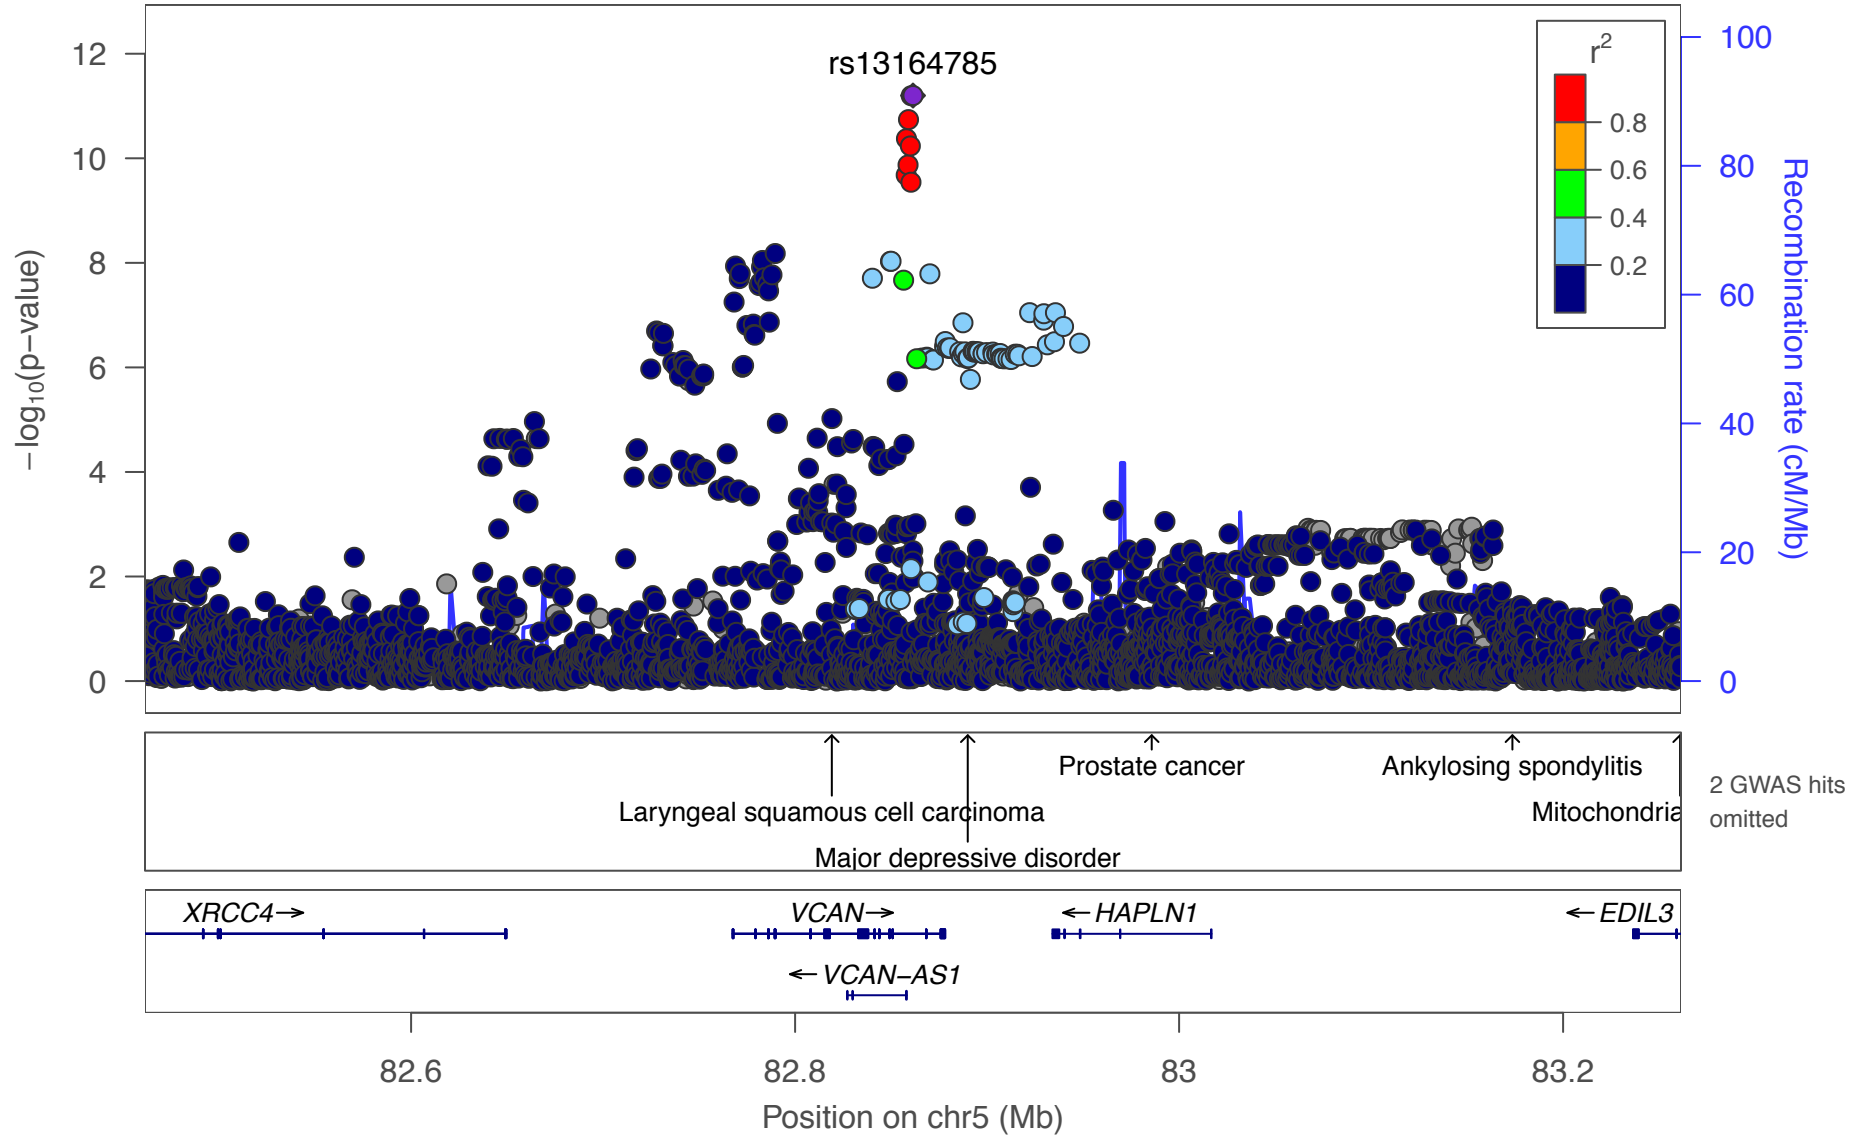

date: Thu Aug 17 17:58:11 2017

build: hg19

display range: chr5:82461400–83261400 [82461400–83261400]

hilite range: 0 – 0 [ 0 – 0 ]

reference SNP: chr5:82861400

number of SNPs plotted: 3396

min P.value: 6.31E–12 [chr5:82861400]

max P.value: 10E–1 [chr5:83231254]

omitted GWAS Hits: chr5:83.260938–Mitochondrial DNA levels, NA

## GWAS Catalog SNPs in Region

| <b>chr</b> | <b>pos (Mb)</b> | <b>trait</b>                      | <b>snp</b> |
|------------|-----------------|-----------------------------------|------------|
| 5          | 82.81912        | Laryngeal squamous cell carcinoma | rs310518   |
| 5          | 82.84549        | Diisocyanate-induced asthma       | rs3852186  |
| 5          | 82.88991        | Major depressive disorder         | rs310501   |
| 5          | 82.96073        | Visceral fat                      | rs3846635  |
| 5          | 82.98574        | Prostate cancer                   | rs4466137  |
| 5          | 83.17359        | Ankylosing spondylitis            | rs4552569  |
| 5          | 83.26094        | Mitochondrial DNA levels          | rs2301070  |

# ProbtrackX\_L1\_unc\_I

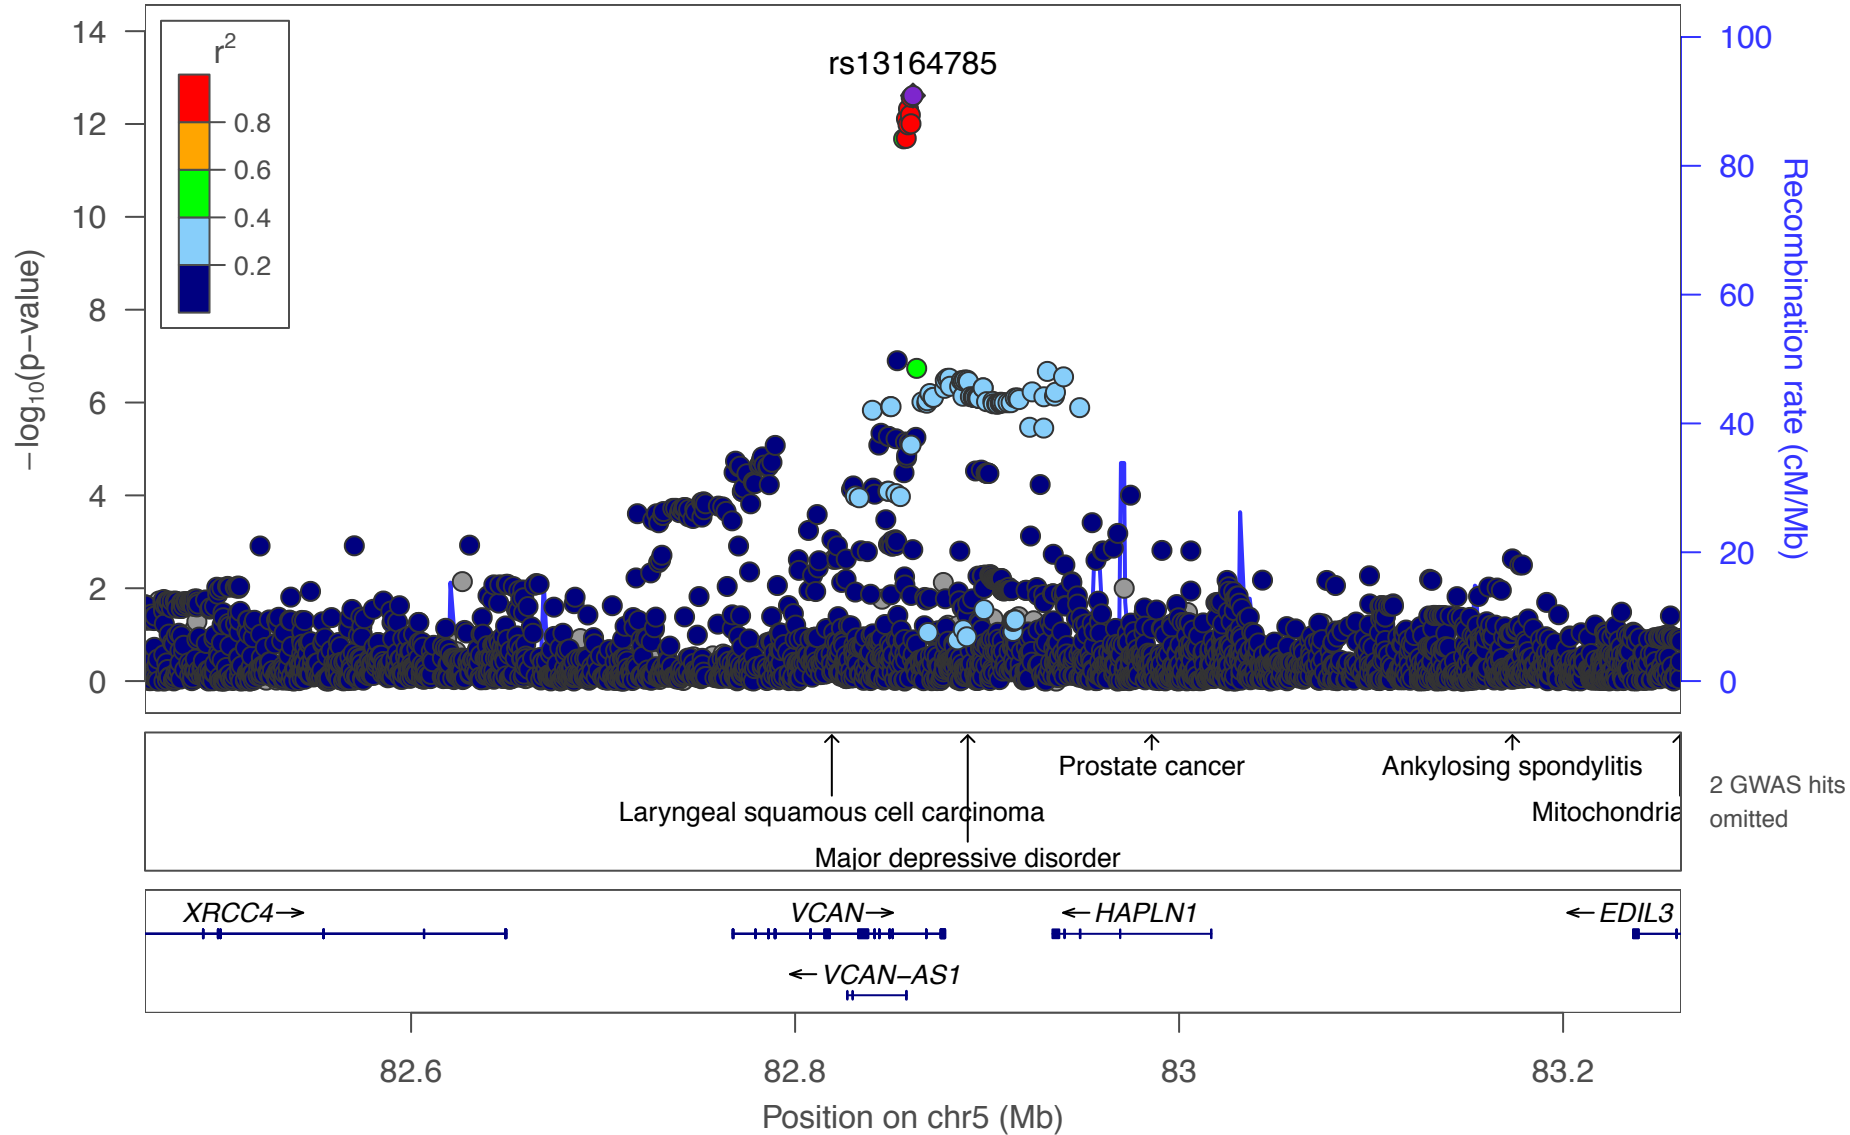

date: Thu Aug 17 17:58:11 2017

build: hg19

display range: chr5:82461400–83261400 [82461400–83261400]

hilite range: 0 – 0 [ 0 – 0 ]

reference SNP: chr5:82861400

number of SNPs plotted: 3396

min P.value: 2.44E–13 [chr5:82861400]

max P.value: 10E–1 [chr5:82471279]

omitted GWAS Hits: chr5:83.260938–Mitochondrial DNA levels, NA

## GWAS Catalog SNPs in Region

| <b>chr</b> | <b>pos (Mb)</b> | <b>trait</b>                      | <b>snp</b> |
|------------|-----------------|-----------------------------------|------------|
| 5          | 82.81912        | Laryngeal squamous cell carcinoma | rs310518   |
| 5          | 82.84549        | Diisocyanate-induced asthma       | rs3852186  |
| 5          | 82.88991        | Major depressive disorder         | rs310501   |
| 5          | 82.96073        | Visceral fat                      | rs3846635  |
| 5          | 82.98574        | Prostate cancer                   | rs4466137  |
| 5          | 83.17359        | Ankylosing spondylitis            | rs4552569  |
| 5          | 83.26094        | Mitochondrial DNA levels          | rs2301070  |

# ProbtrackX\_L2\_atr\_I

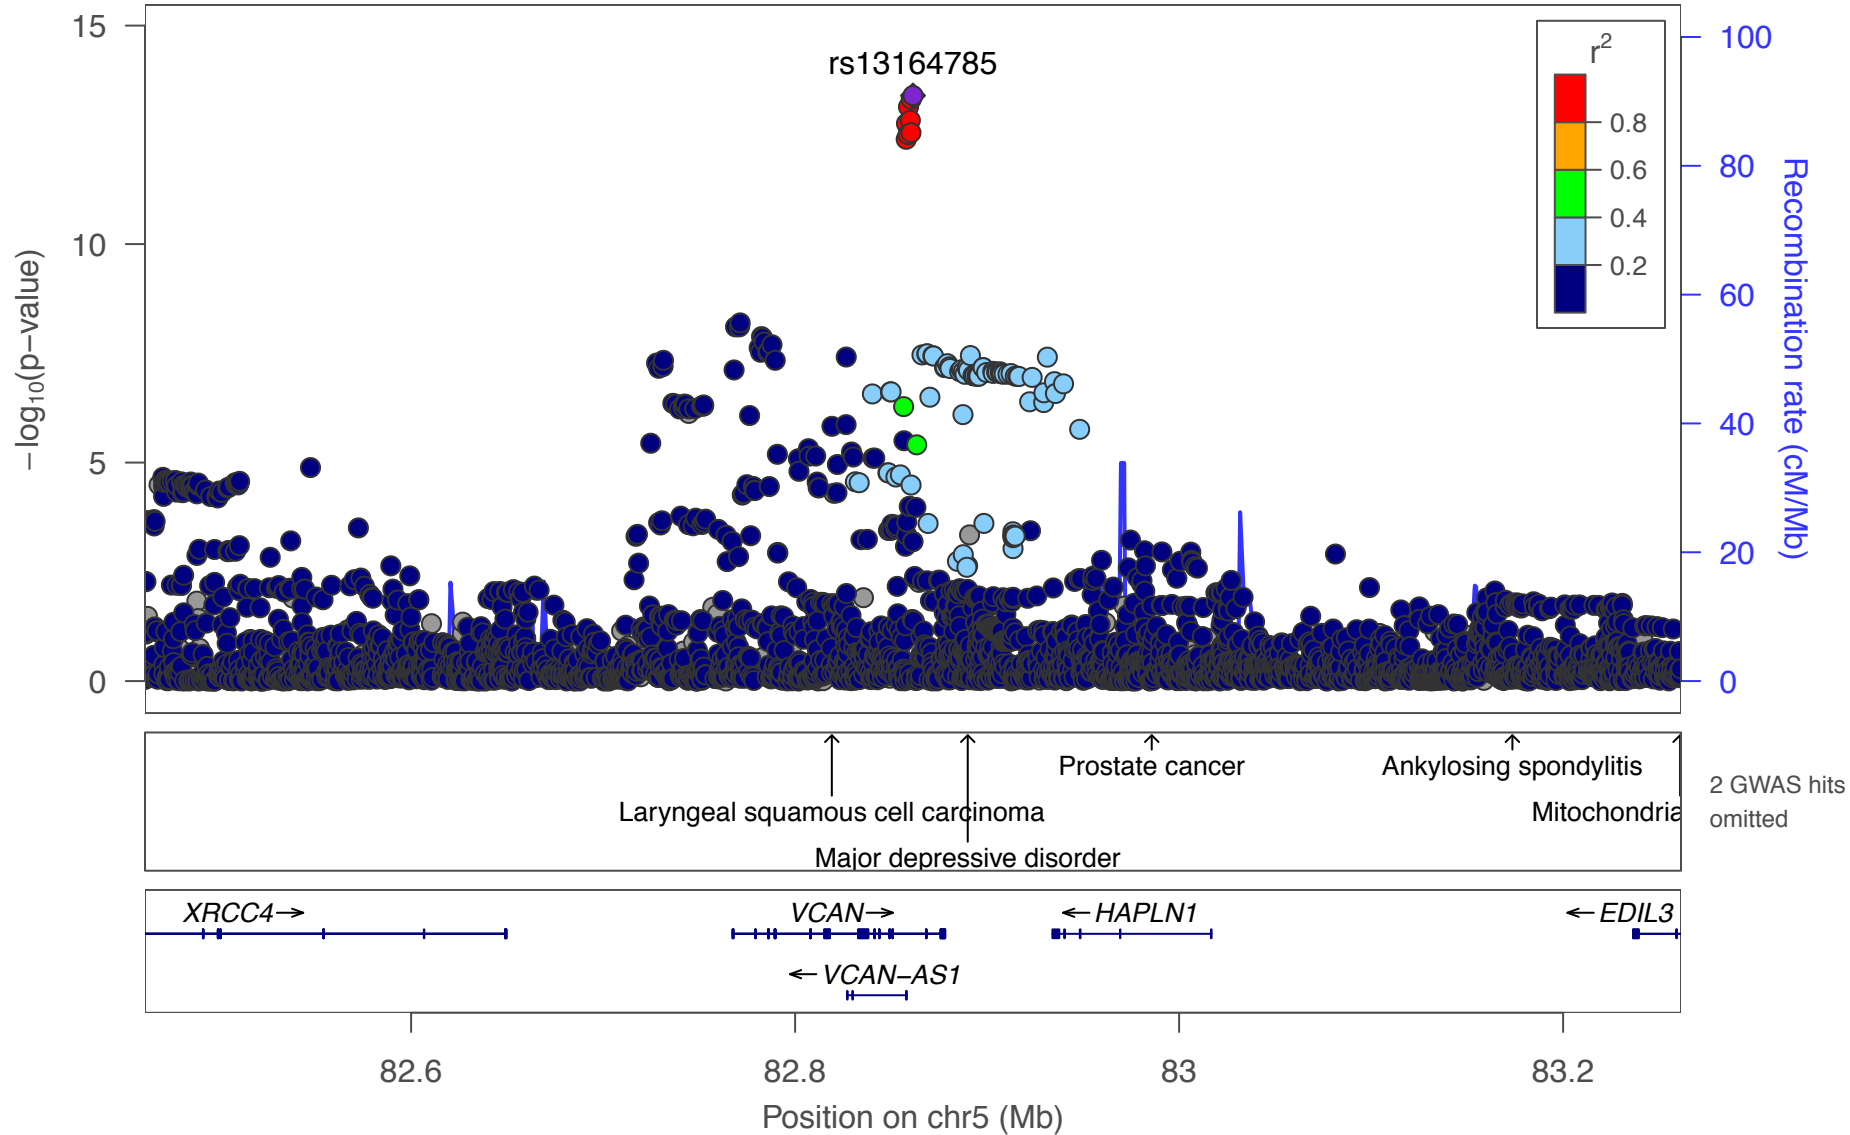

date: Thu Aug 17 17:58:11 2017

build: hg19

display range: chr5:82461400–83261400 [82461400–83261400]

hilite range: 0 – 0 [ 0 – 0 ]

reference SNP: chr5:82861400

number of SNPs plotted: 3396

min P.value: 3.99E–14 [chr5:82861400]

max P.value: 9.99E–1 [chr5:82634569]

omitted GWAS Hits: chr5:83.260938–Mitochondrial DNA levels, NA



## GWAS Catalog SNPs in Region

| <b>chr</b> | <b>pos (Mb)</b> | <b>trait</b>                      | <b>snp</b> |
|------------|-----------------|-----------------------------------|------------|
| 5          | 82.81912        | Laryngeal squamous cell carcinoma | rs310518   |
| 5          | 82.84549        | Diisocyanate-induced asthma       | rs3852186  |
| 5          | 82.88991        | Major depressive disorder         | rs310501   |
| 5          | 82.96073        | Visceral fat                      | rs3846635  |
| 5          | 82.98574        | Prostate cancer                   | rs4466137  |
| 5          | 83.17359        | Ankylosing spondylitis            | rs4552569  |
| 5          | 83.26094        | Mitochondrial DNA levels          | rs2301070  |

# ProbtrackX\_L2\_atr\_r

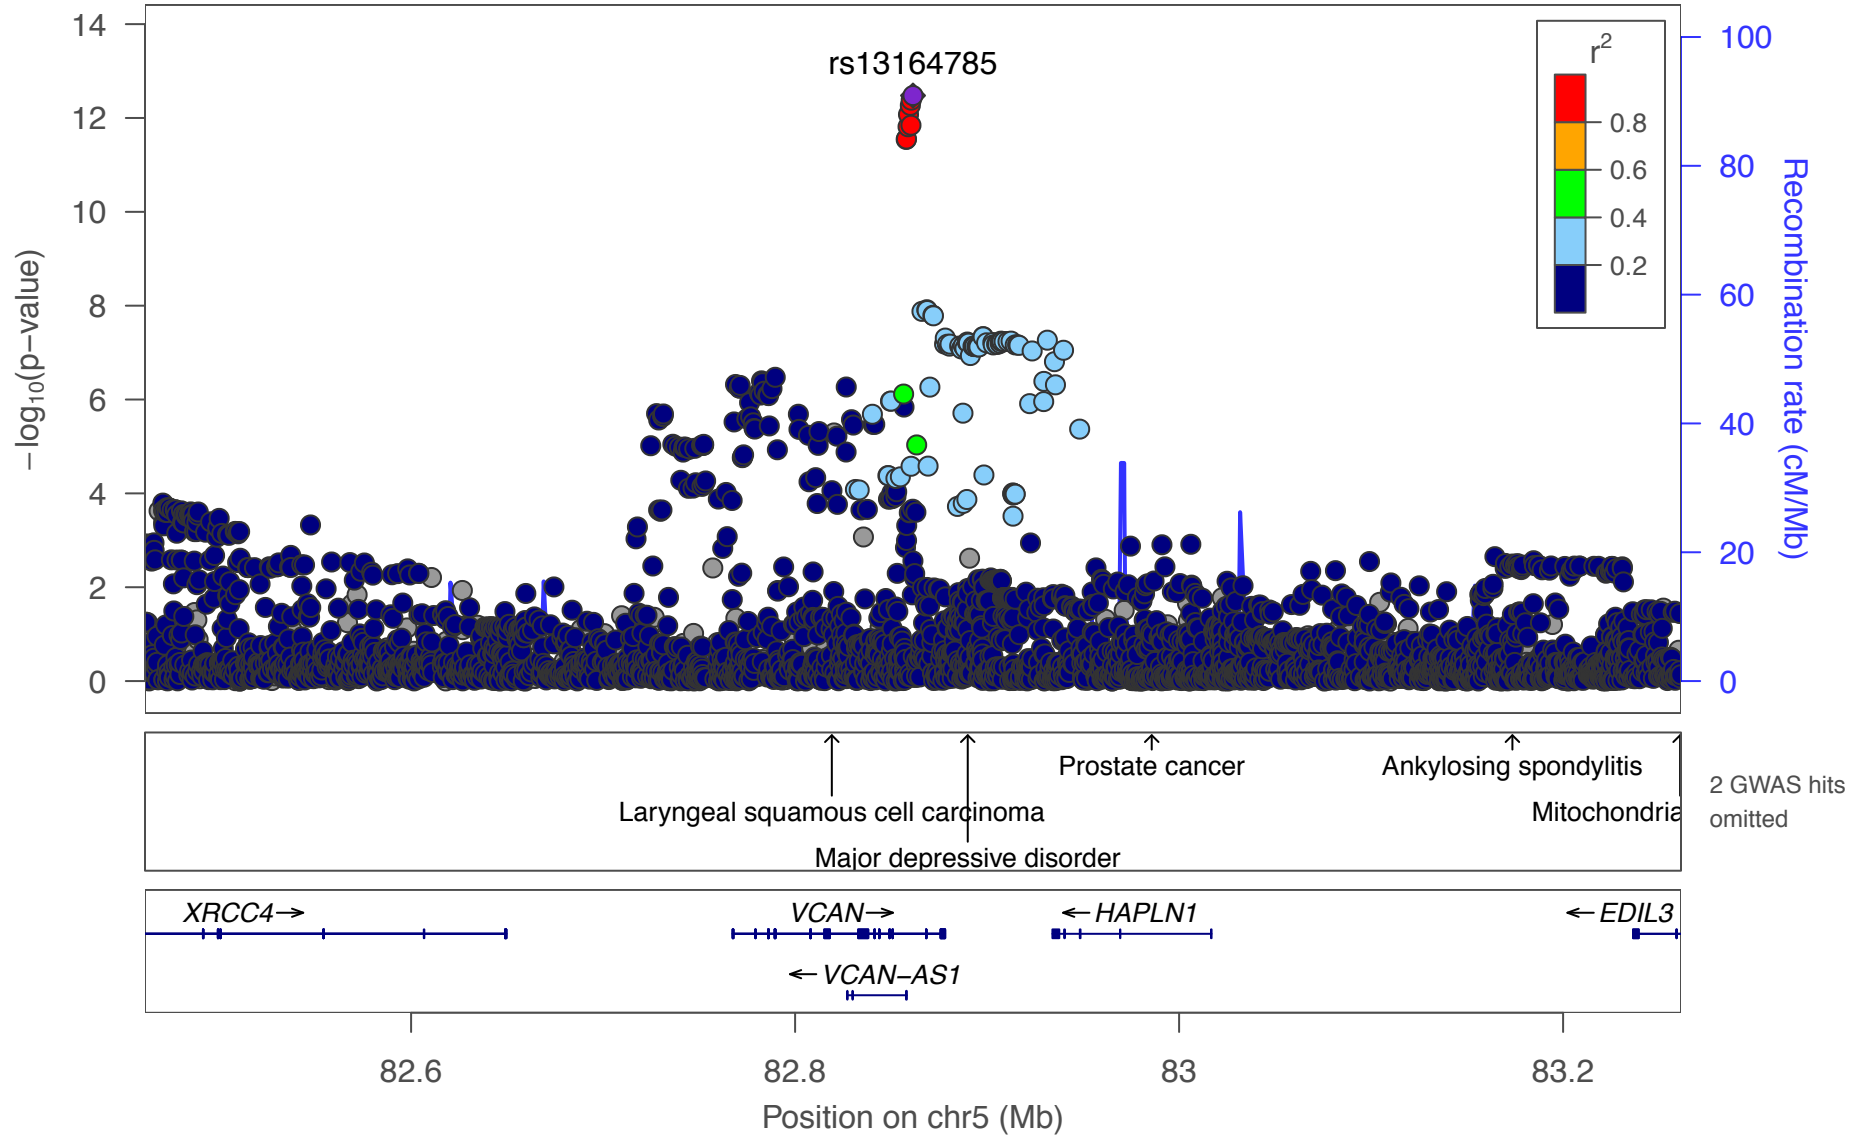

date: Thu Aug 17 17:58:11 2017

build: hg19

display range: chr5:82461400–83261400 [82461400–83261400]

hilite range: 0 – 0 [ 0 – 0 ]

reference SNP: chr5:82861400

number of SNPs plotted: 3396

min P.value: 3.33E–13 [chr5:82861400]

max P.value: 10E–1 [chr5:83167859]

omitted GWAS Hits: chr5:83.260938–Mitochondrial DNA levels, NA

## GWAS Catalog SNPs in Region

| <b>chr</b> | <b>pos (Mb)</b> | <b>trait</b>                      | <b>snp</b> |
|------------|-----------------|-----------------------------------|------------|
| 5          | 82.81912        | Laryngeal squamous cell carcinoma | rs310518   |
| 5          | 82.84549        | Diisocyanate-induced asthma       | rs3852186  |
| 5          | 82.88991        | Major depressive disorder         | rs310501   |
| 5          | 82.96073        | Visceral fat                      | rs3846635  |
| 5          | 82.98574        | Prostate cancer                   | rs4466137  |
| 5          | 83.17359        | Ankylosing spondylitis            | rs4552569  |
| 5          | 83.26094        | Mitochondrial DNA levels          | rs2301070  |

# ProbtrackX\_L2\_fmi

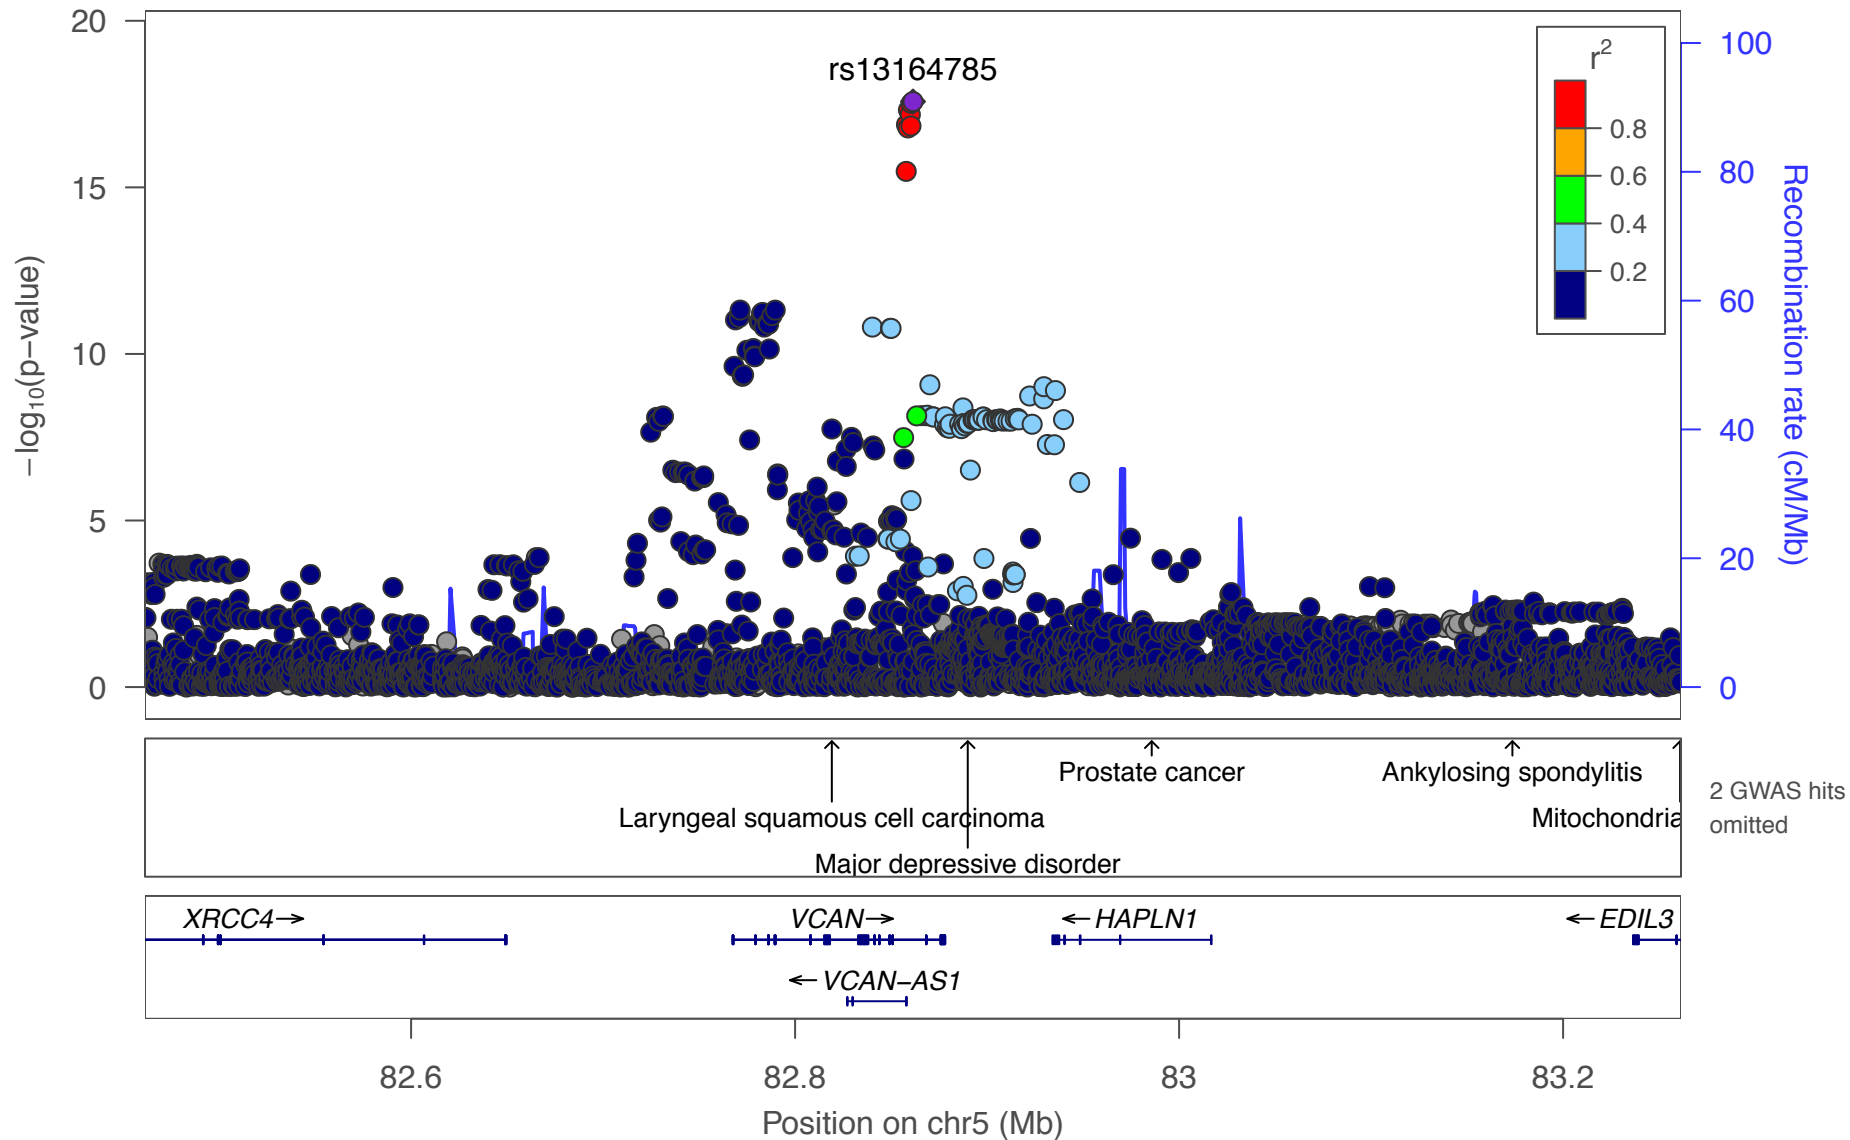

date: Thu Aug 17 17:58:11 2017

build: hg19

display range: chr5:82461400–83261400 [82461400–83261400]

hilite range: 0 – 0 [ 0 – 0 ]

reference SNP: chr5:82861400

number of SNPs plotted: 3396

min P.value: 2.65E–18 [chr5:82861400]

max P.value: 9.99E–1 [chr5:82676039]

omitted GWAS Hits: chr5:83.260938–Mitochondrial DNA levels, NA

## GWAS Catalog SNPs in Region

| <b>chr</b> | <b>pos (Mb)</b> | <b>trait</b>                      | <b>snp</b> |
|------------|-----------------|-----------------------------------|------------|
| 5          | 82.81912        | Laryngeal squamous cell carcinoma | rs310518   |
| 5          | 82.84549        | Diisocyanate-induced asthma       | rs3852186  |
| 5          | 82.88991        | Major depressive disorder         | rs310501   |
| 5          | 82.96073        | Visceral fat                      | rs3846635  |
| 5          | 82.98574        | Prostate cancer                   | rs4466137  |
| 5          | 83.17359        | Ankylosing spondylitis            | rs4552569  |
| 5          | 83.26094        | Mitochondrial DNA levels          | rs2301070  |

# ProbtrackX\_L2\_ptr\_I

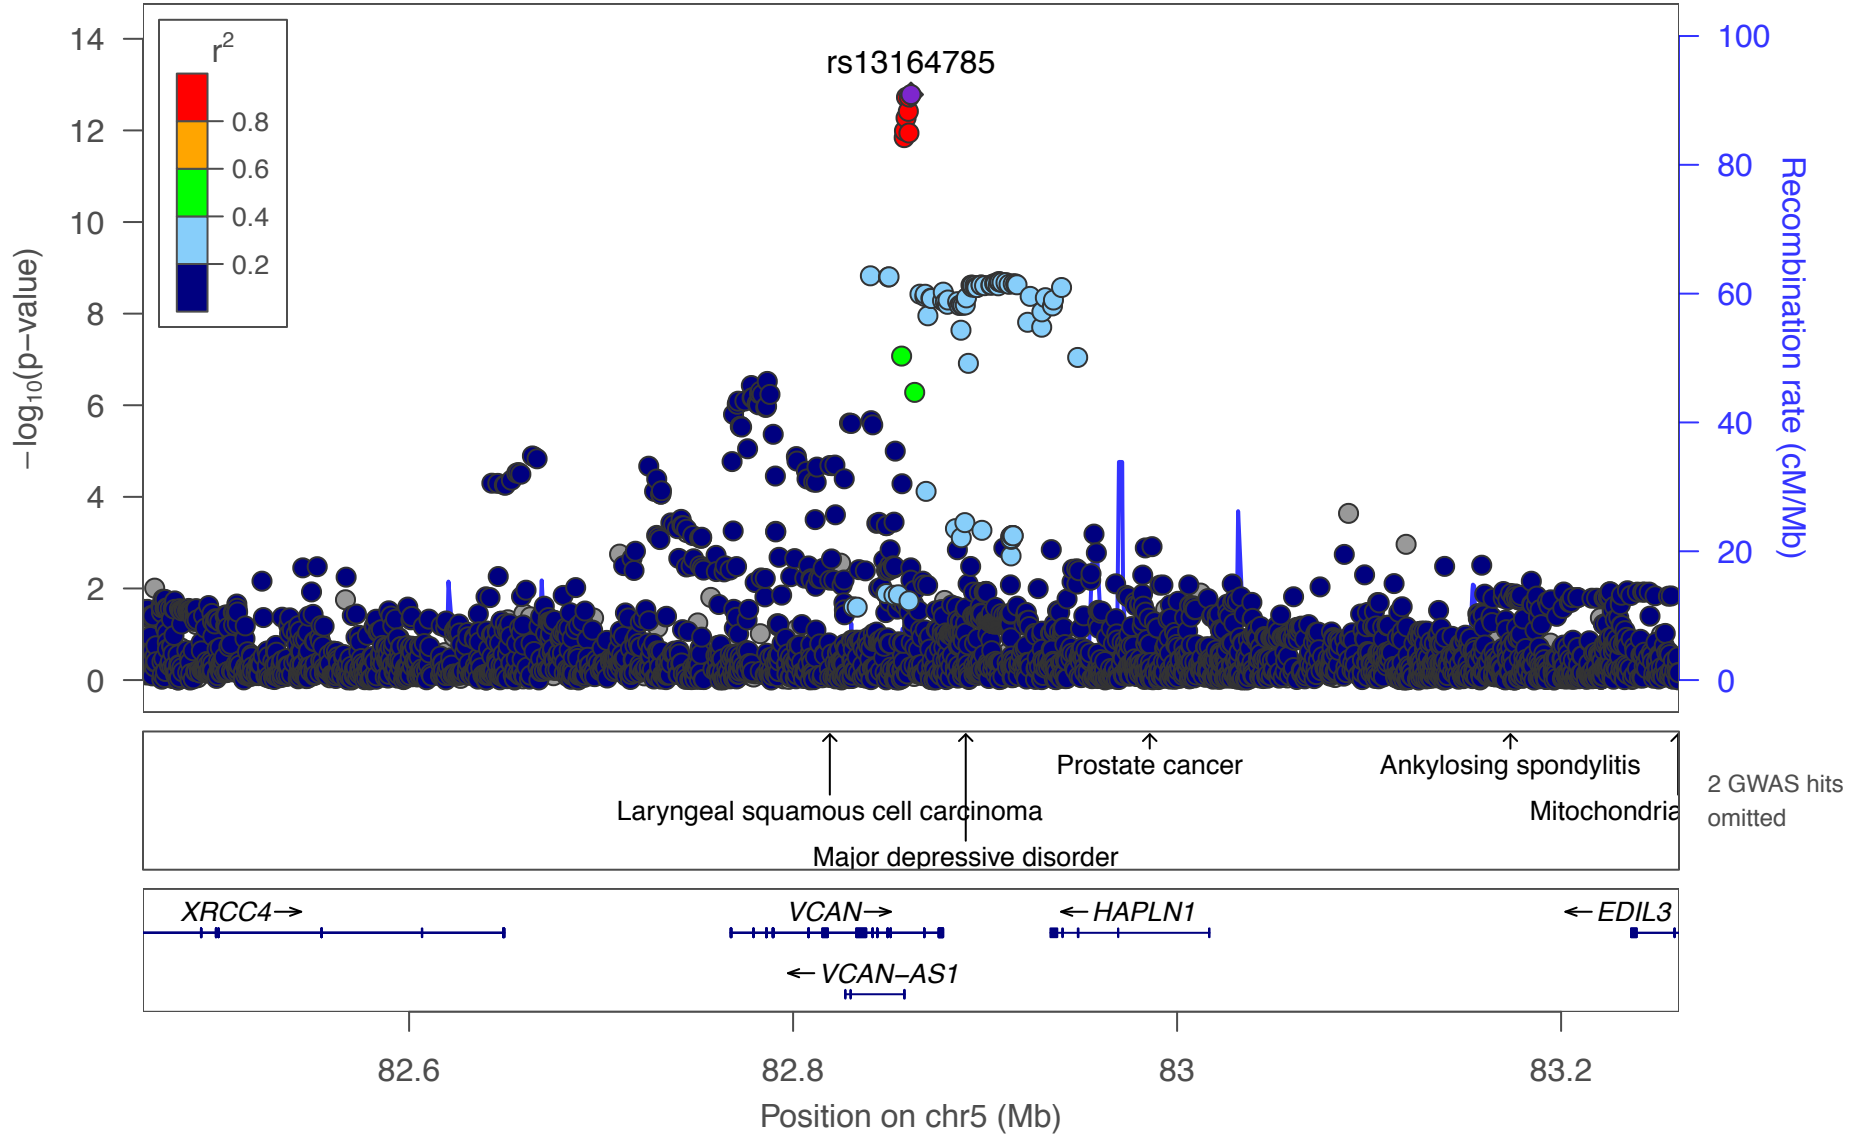



date: Thu Aug 17 17:58:11 2017

build: hg19

display range: chr5:82461400–83261400 [82461400–83261400]

hilite range: 0 – 0 [ 0 – 0 ]

reference SNP: chr5:82861400

number of SNPs plotted: 3396

min P.value: 1.65E–13 [chr5:82861400]

max P.value: 10E–1 [chr5:83118236]

omitted GWAS Hits: chr5:83.260938–Mitochondrial DNA levels, NA

## GWAS Catalog SNPs in Region

| <b>chr</b> | <b>pos (Mb)</b> | <b>trait</b>                      | <b>snp</b> |
|------------|-----------------|-----------------------------------|------------|
| 5          | 82.81912        | Laryngeal squamous cell carcinoma | rs310518   |
| 5          | 82.84549        | Diisocyanate-induced asthma       | rs3852186  |
| 5          | 82.88991        | Major depressive disorder         | rs310501   |
| 5          | 82.96073        | Visceral fat                      | rs3846635  |
| 5          | 82.98574        | Prostate cancer                   | rs4466137  |
| 5          | 83.17359        | Ankylosing spondylitis            | rs4552569  |
| 5          | 83.26094        | Mitochondrial DNA levels          | rs2301070  |

# ProbtrackX\_L2\_slf\_I

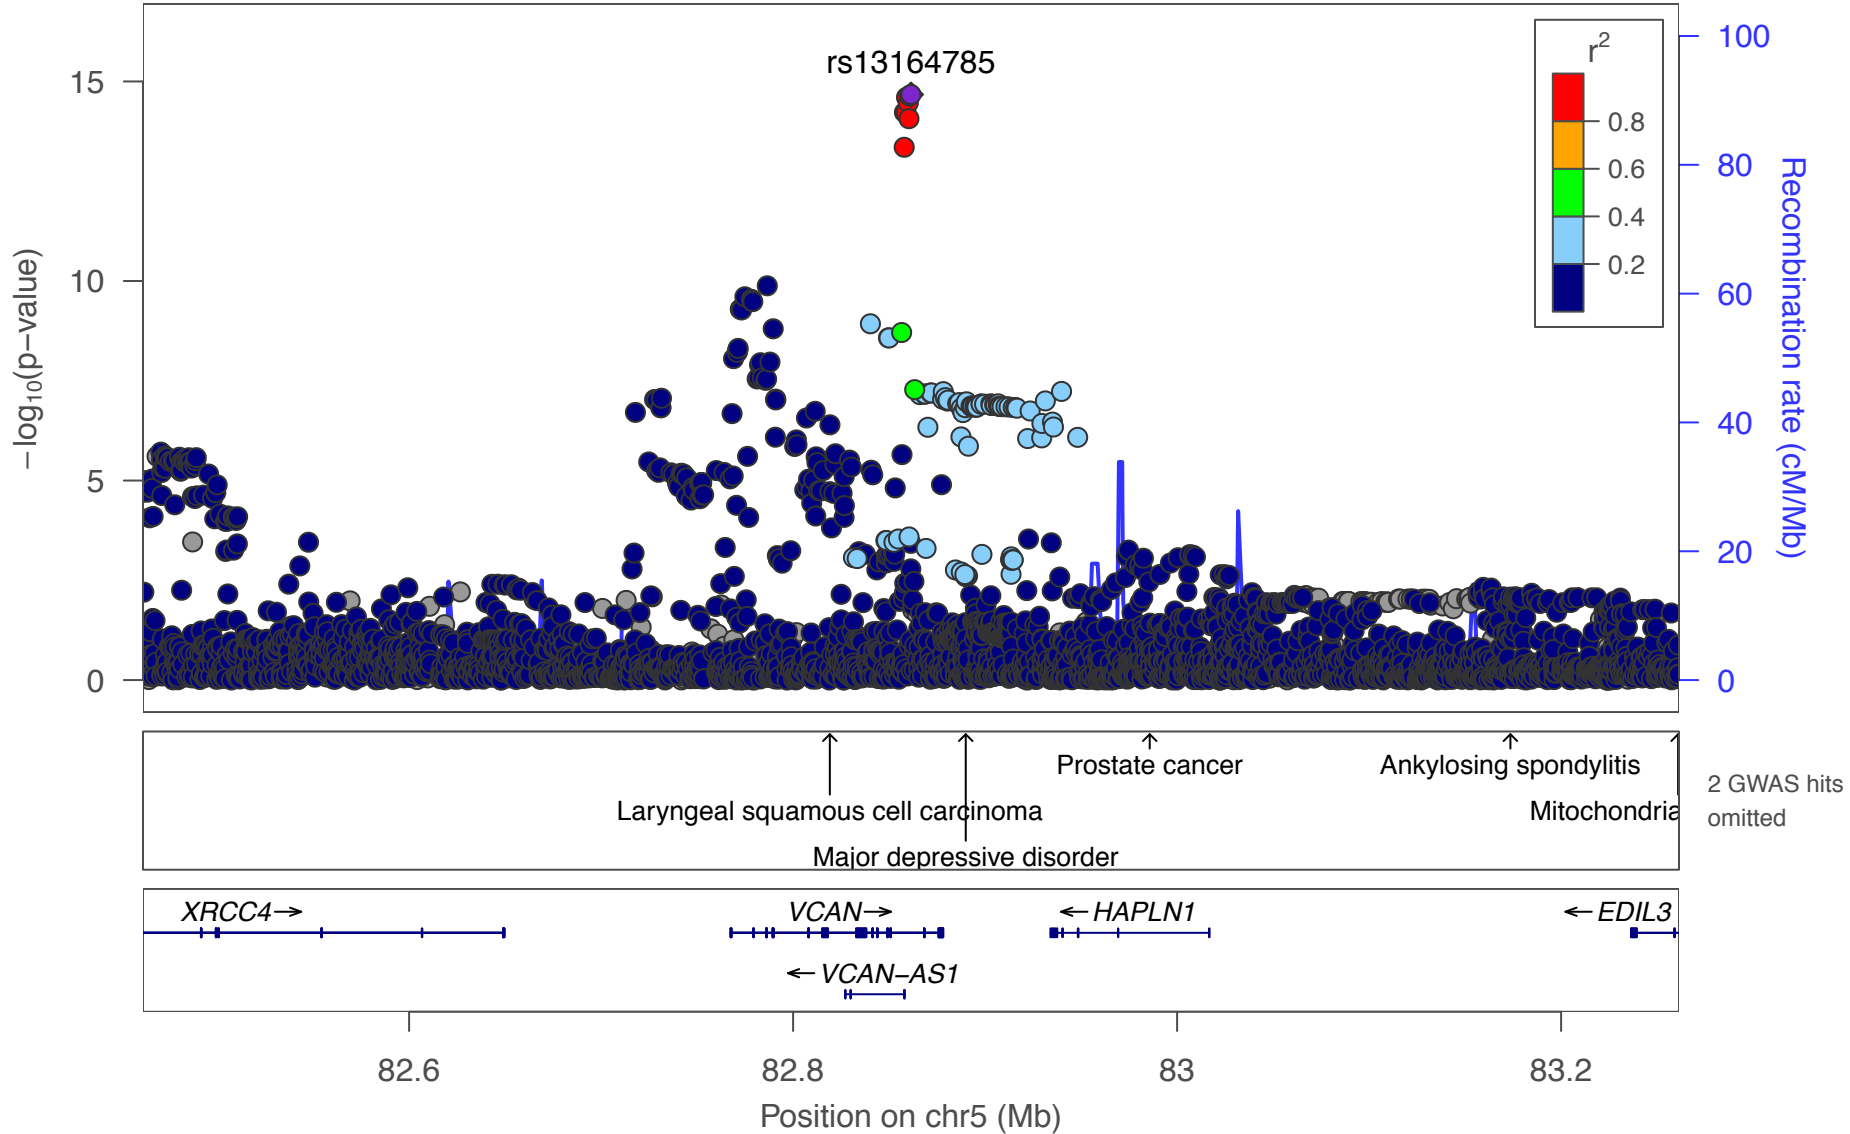

date: Thu Aug 17 17:58:12 2017

build: hg19

display range: chr5:82461400–83261400 [82461400–83261400]

hilite range: 0 – 0 [ 0 – 0 ]

reference SNP: chr5:82861400

number of SNPs plotted: 3396

min P.value: 2.13E–15 [chr5:82861400]

max P.value: 9.99E–1 [chr5:83022127]

omitted GWAS Hits: chr5:83.260938–Mitochondrial DNA levels, NA

## GWAS Catalog SNPs in Region

| <b>chr</b> | <b>pos (Mb)</b> | <b>trait</b>                      | <b>snp</b> |
|------------|-----------------|-----------------------------------|------------|
| 5          | 82.81912        | Laryngeal squamous cell carcinoma | rs310518   |
| 5          | 82.84549        | Diisocyanate-induced asthma       | rs3852186  |
| 5          | 82.88991        | Major depressive disorder         | rs310501   |
| 5          | 82.96073        | Visceral fat                      | rs3846635  |
| 5          | 82.98574        | Prostate cancer                   | rs4466137  |
| 5          | 83.17359        | Ankylosing spondylitis            | rs4552569  |
| 5          | 83.26094        | Mitochondrial DNA levels          | rs2301070  |

# ProbtrackX\_L2\_unc\_I

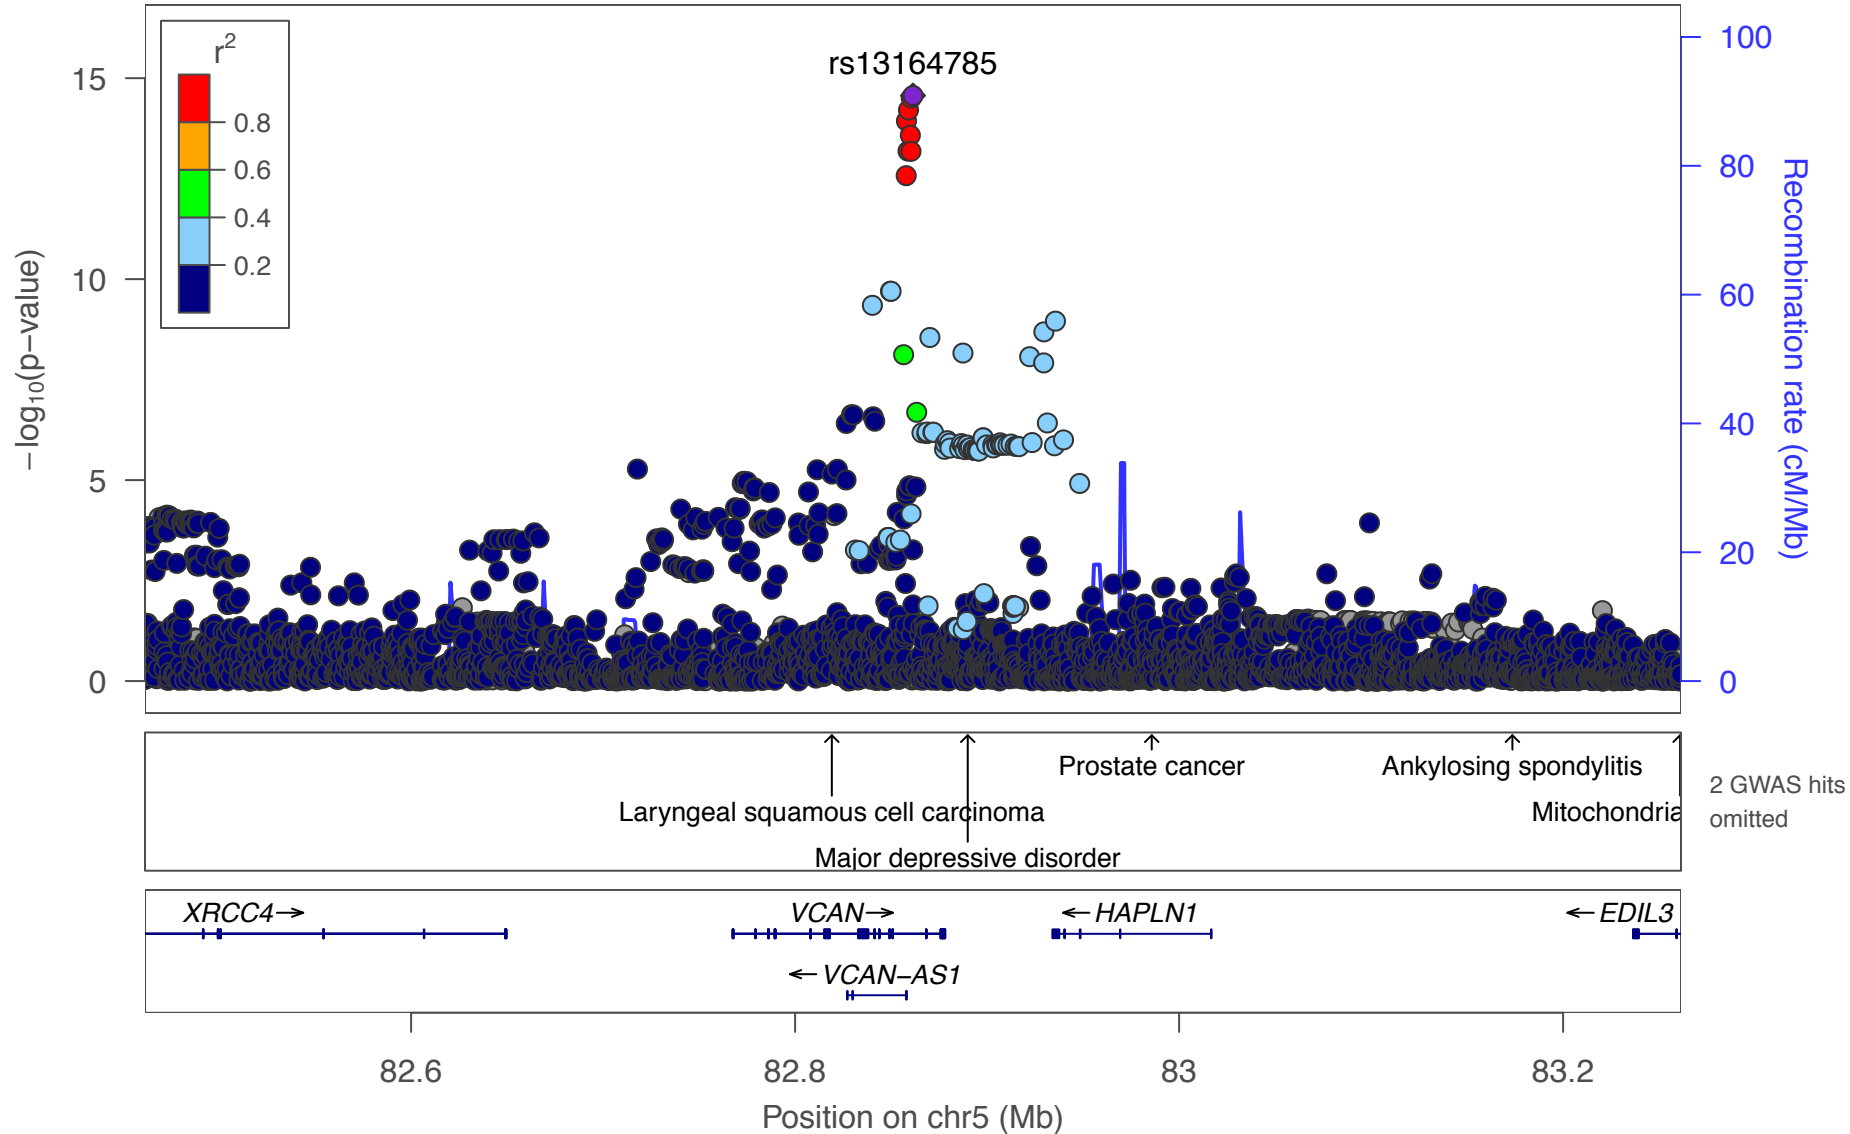

date: Thu Aug 17 17:58:12 2017

build: hg19

display range: chr5:82461400–83261400 [82461400–83261400]

hilite range: 0 – 0 [ 0 – 0 ]

reference SNP: chr5:82861400

number of SNPs plotted: 3396

min P.value: 2.7E–15 [chr5:82861400]

max P.value: 9.99E–1 [chr5:82941836]

omitted GWAS Hits: chr5:83.260938–Mitochondrial DNA levels, NA

## GWAS Catalog SNPs in Region

| <b>chr</b> | <b>pos (Mb)</b> | <b>trait</b>                      | <b>snp</b> |
|------------|-----------------|-----------------------------------|------------|
| 5          | 82.81912        | Laryngeal squamous cell carcinoma | rs310518   |
| 5          | 82.84549        | Diisocyanate-induced asthma       | rs3852186  |
| 5          | 82.88991        | Major depressive disorder         | rs310501   |
| 5          | 82.96073        | Visceral fat                      | rs3846635  |
| 5          | 82.98574        | Prostate cancer                   | rs4466137  |
| 5          | 83.17359        | Ankylosing spondylitis            | rs4552569  |
| 5          | 83.26094        | Mitochondrial DNA levels          | rs2301070  |



# ProbtrackX\_L2\_unc\_r

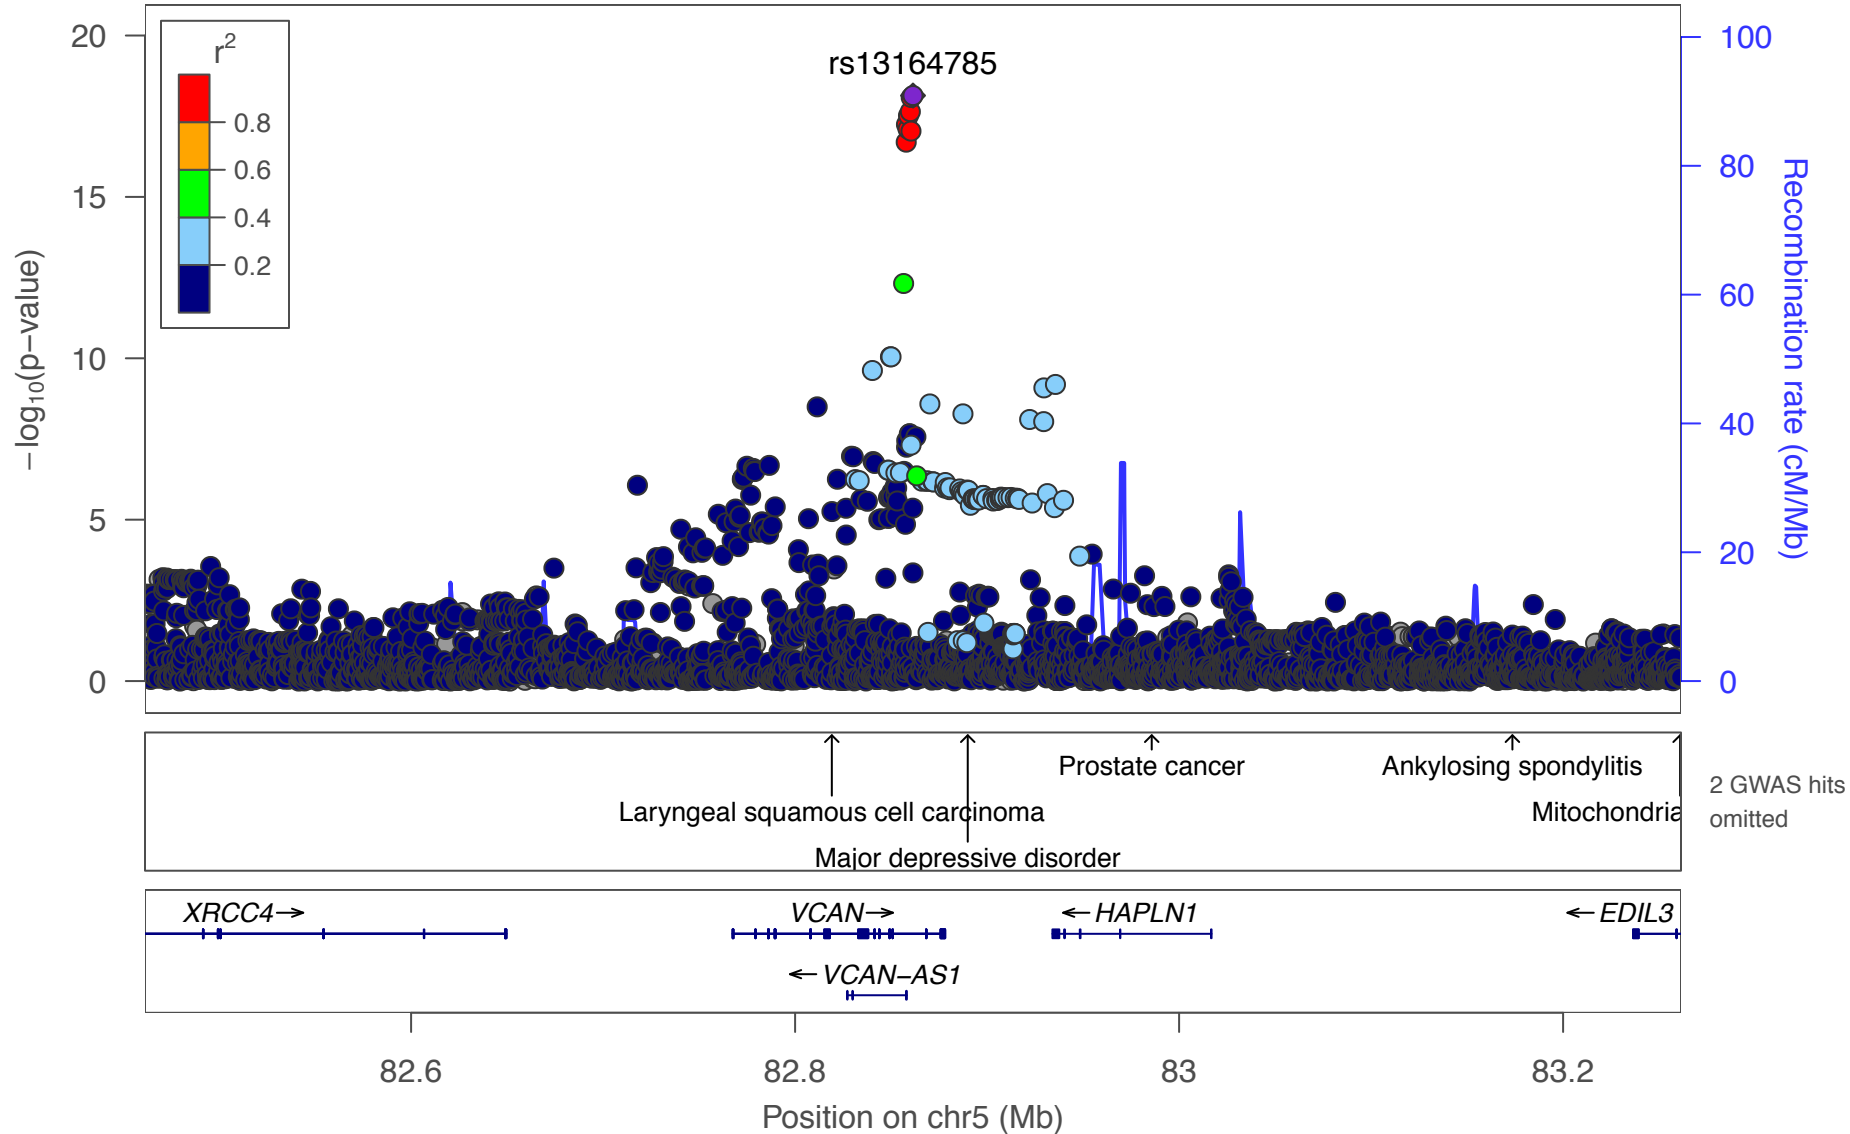

date: Thu Aug 17 17:58:12 2017

build: hg19

display range: chr5:82461400–83261400 [82461400–83261400]

hilite range: 0 – 0 [ 0 – 0 ]

reference SNP: chr5:82861400

number of SNPs plotted: 3396

min P.value: 7.24E–19 [chr5:82861400]

max P.value: 10E–1 [chr5:82594107]

omitted GWAS Hits: chr5:83.260938–Mitochondrial DNA levels, NA

## GWAS Catalog SNPs in Region

| <b>chr</b> | <b>pos (Mb)</b> | <b>trait</b>                      | <b>snp</b> |
|------------|-----------------|-----------------------------------|------------|
| 5          | 82.81912        | Laryngeal squamous cell carcinoma | rs310518   |
| 5          | 82.84549        | Diisocyanate-induced asthma       | rs3852186  |
| 5          | 82.88991        | Major depressive disorder         | rs310501   |
| 5          | 82.96073        | Visceral fat                      | rs3846635  |
| 5          | 82.98574        | Prostate cancer                   | rs4466137  |
| 5          | 83.17359        | Ankylosing spondylitis            | rs4552569  |
| 5          | 83.26094        | Mitochondrial DNA levels          | rs2301070  |

# ProbtrackX\_L3\_atr\_I

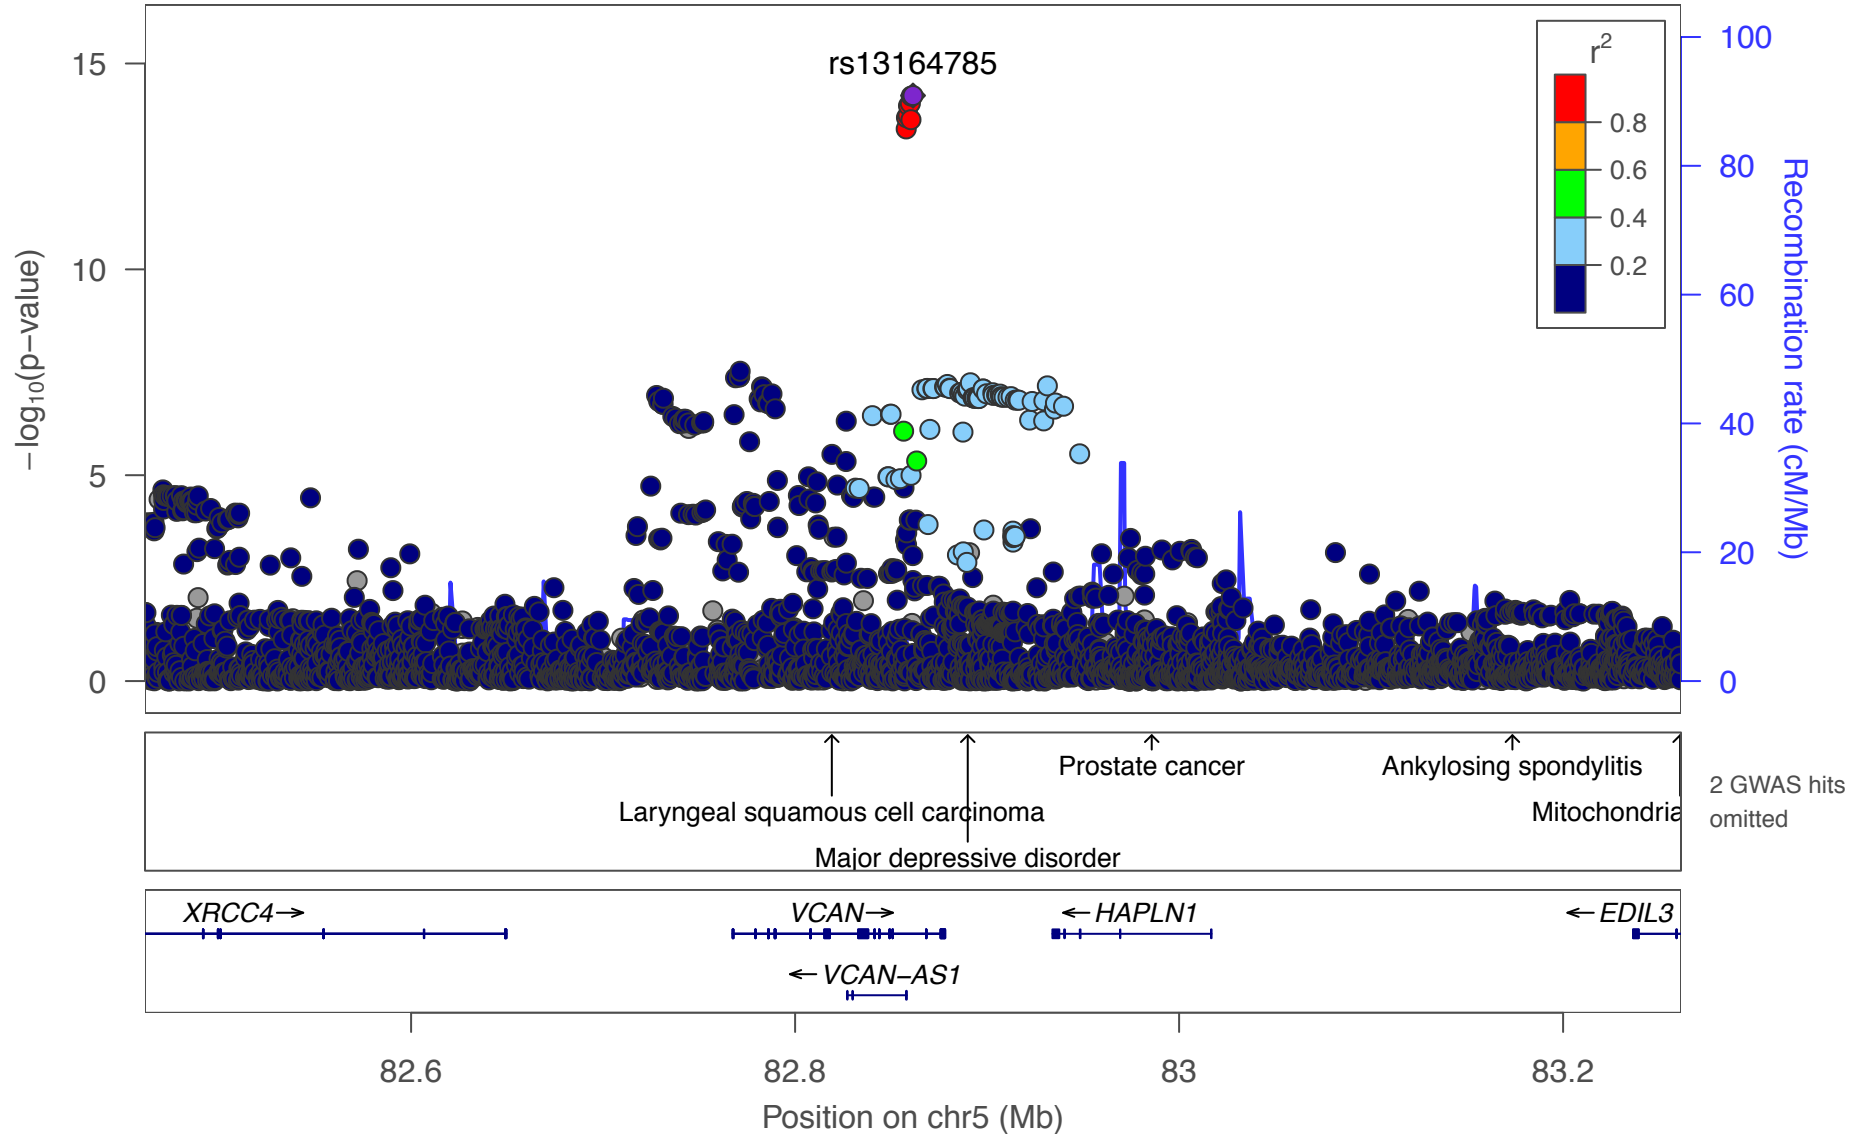

date: Thu Aug 17 17:58:12 2017

build: hg19

display range: chr5:82461400–83261400 [82461400–83261400]

hilite range: 0 – 0 [ 0 – 0 ]

reference SNP: chr5:82861400

number of SNPs plotted: 3396

min P.value: 6.01E–15 [chr5:82861400]

max P.value: 10E–1 [chr5:82974532]

omitted GWAS Hits: chr5:83.260938–Mitochondrial DNA levels, NA

## GWAS Catalog SNPs in Region

| <b>chr</b> | <b>pos (Mb)</b> | <b>trait</b>                      | <b>snp</b> |
|------------|-----------------|-----------------------------------|------------|
| 5          | 82.81912        | Laryngeal squamous cell carcinoma | rs310518   |
| 5          | 82.84549        | Diisocyanate-induced asthma       | rs3852186  |
| 5          | 82.88991        | Major depressive disorder         | rs310501   |
| 5          | 82.96073        | Visceral fat                      | rs3846635  |
| 5          | 82.98574        | Prostate cancer                   | rs4466137  |
| 5          | 83.17359        | Ankylosing spondylitis            | rs4552569  |
| 5          | 83.26094        | Mitochondrial DNA levels          | rs2301070  |

# ProbtrackX\_L3\_atr\_r

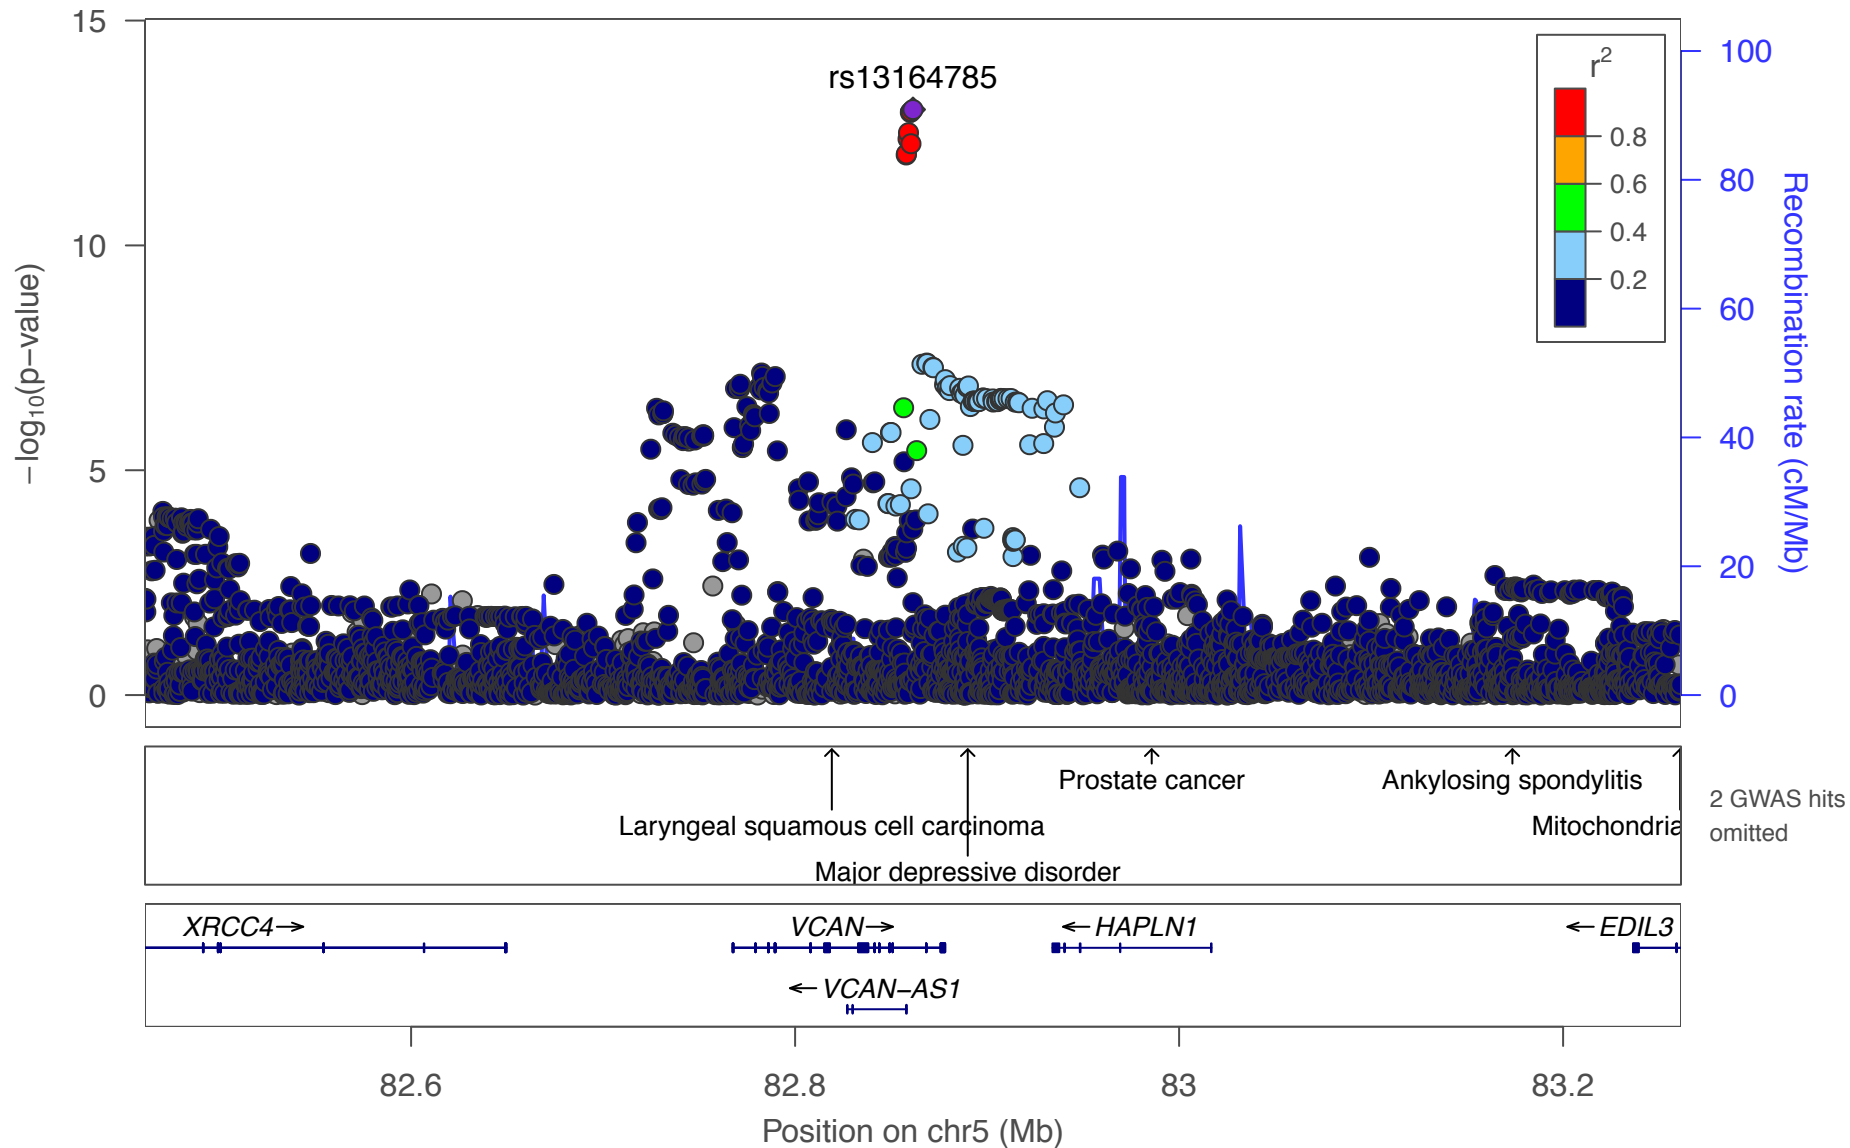

date: Thu Aug 17 17:58:12 2017

build: hg19

display range: chr5:82461400–83261400 [82461400–83261400]

hilite range: 0 – 0 [ 0 – 0 ]

reference SNP: chr5:82861400

number of SNPs plotted: 3396

min P.value: 9.53E–14 [chr5:82861400]

max P.value: 10E–1 [chr5:82706652]

omitted GWAS Hits: chr5:83.260938–Mitochondrial DNA levels, NA



## GWAS Catalog SNPs in Region

| <b>chr</b> | <b>pos (Mb)</b> | <b>trait</b>                      | <b>snp</b> |
|------------|-----------------|-----------------------------------|------------|
| 5          | 82.81912        | Laryngeal squamous cell carcinoma | rs310518   |
| 5          | 82.84549        | Diisocyanate-induced asthma       | rs3852186  |
| 5          | 82.88991        | Major depressive disorder         | rs310501   |
| 5          | 82.96073        | Visceral fat                      | rs3846635  |
| 5          | 82.98574        | Prostate cancer                   | rs4466137  |
| 5          | 83.17359        | Ankylosing spondylitis            | rs4552569  |
| 5          | 83.26094        | Mitochondrial DNA levels          | rs2301070  |

# ProbtrackX\_L3\_fmi

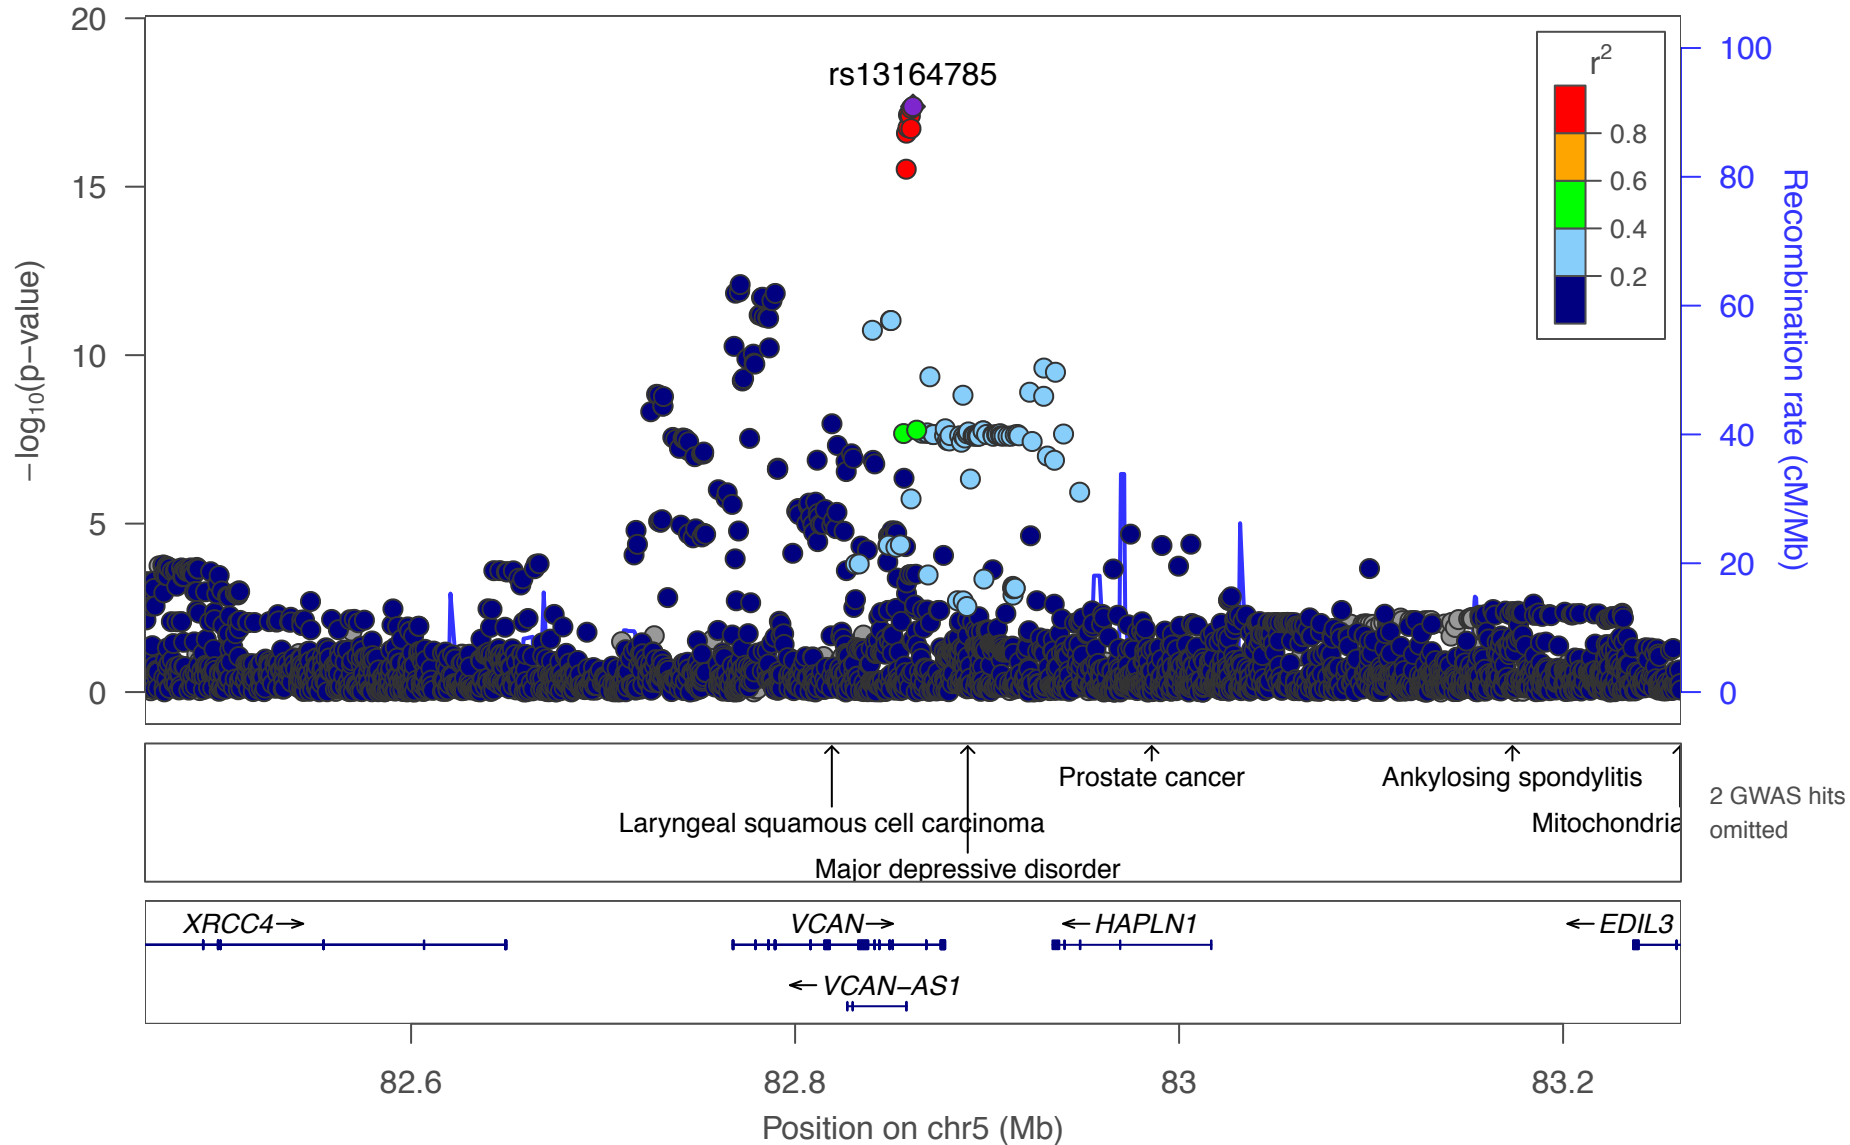

date: Thu Aug 17 17:58:12 2017

build: hg19

display range: chr5:82461400–83261400 [82461400–83261400]

hilite range: 0 – 0 [ 0 – 0 ]

reference SNP: chr5:82861400

number of SNPs plotted: 3396

min P.value: 4.18E–18 [chr5:82861400]

max P.value: 9.98E–1 [chr5:82601623]

omitted GWAS Hits: chr5:83.260938–Mitochondrial DNA levels, NA

## GWAS Catalog SNPs in Region

| <b>chr</b> | <b>pos (Mb)</b> | <b>trait</b>                      | <b>snp</b> |
|------------|-----------------|-----------------------------------|------------|
| 5          | 82.81912        | Laryngeal squamous cell carcinoma | rs310518   |
| 5          | 82.84549        | Diisocyanate-induced asthma       | rs3852186  |
| 5          | 82.88991        | Major depressive disorder         | rs310501   |
| 5          | 82.96073        | Visceral fat                      | rs3846635  |
| 5          | 82.98574        | Prostate cancer                   | rs4466137  |
| 5          | 83.17359        | Ankylosing spondylitis            | rs4552569  |
| 5          | 83.26094        | Mitochondrial DNA levels          | rs2301070  |

# ProbtrackX\_L3\_ifo\_I

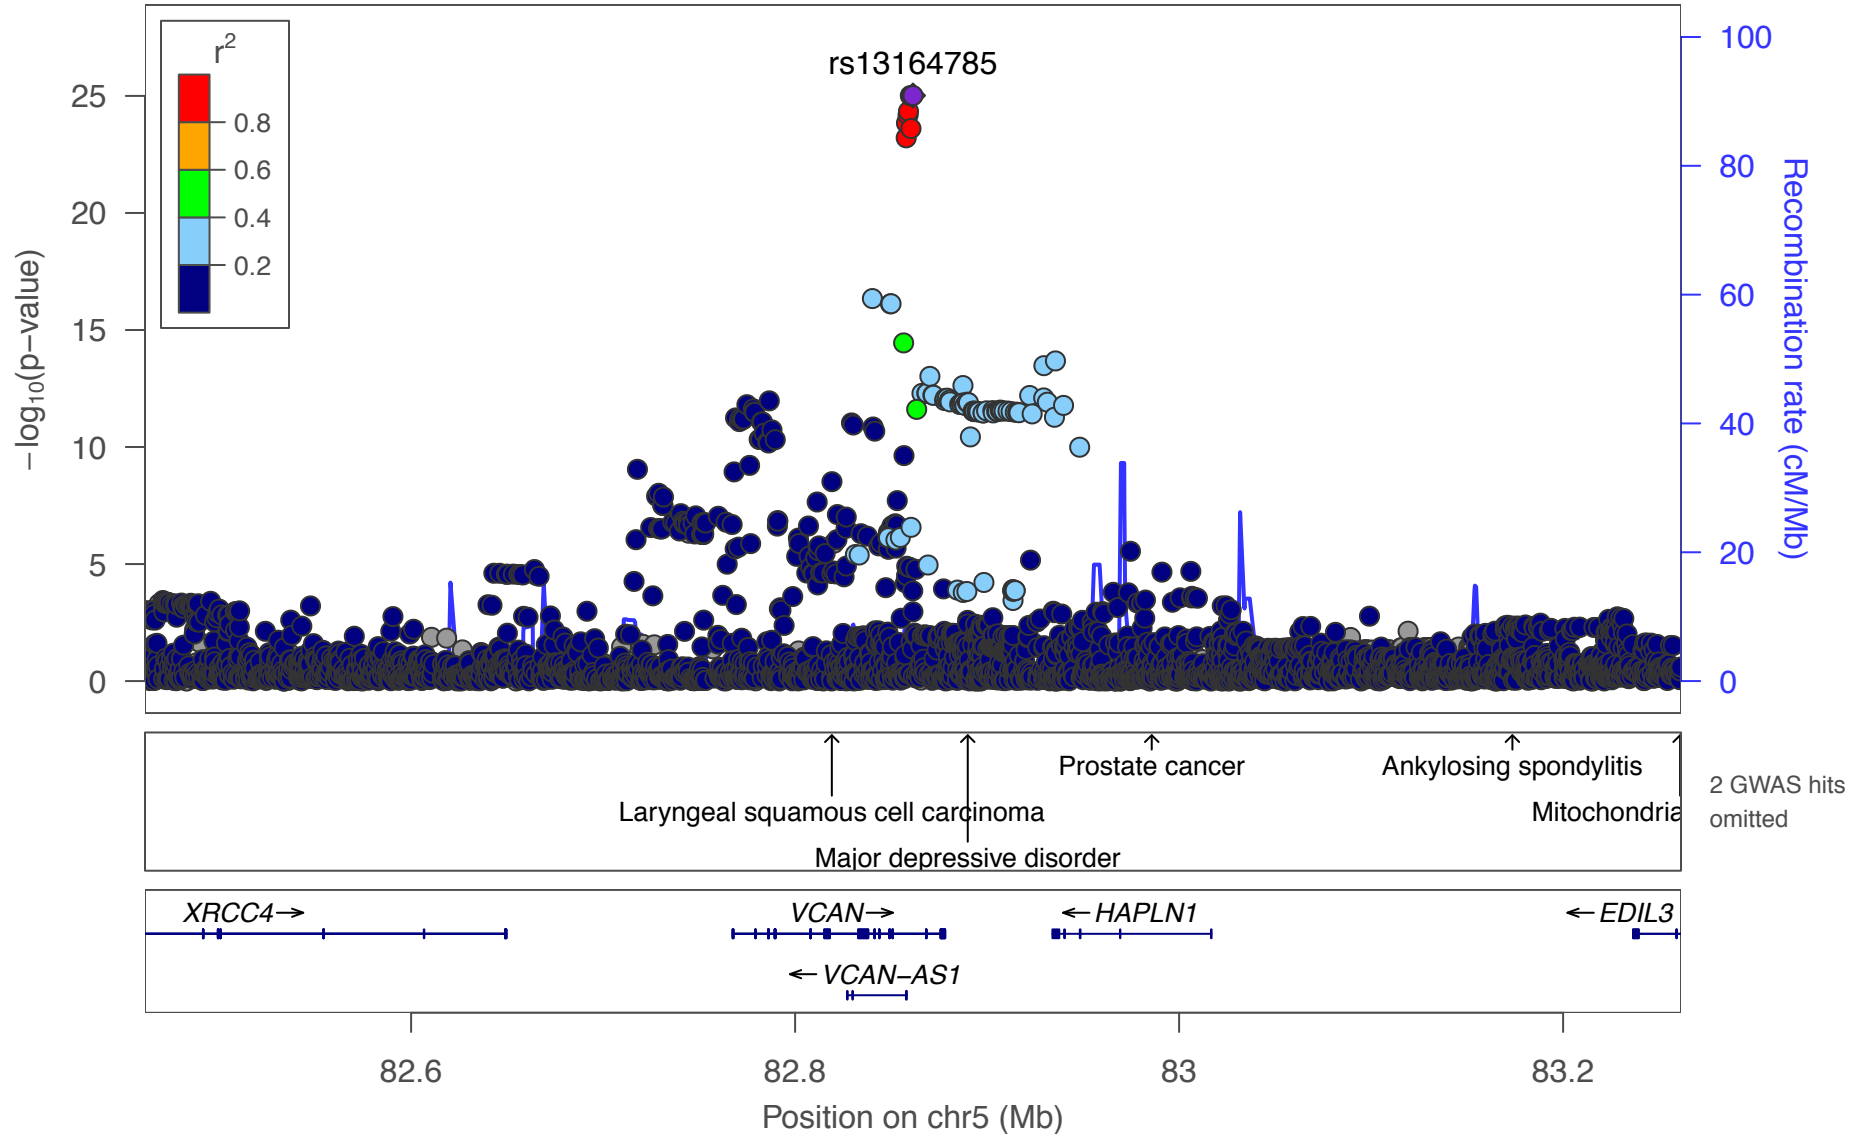

date: Thu Aug 17 17:58:12 2017

build: hg19

display range: chr5:82461400–83261400 [82461400–83261400]

hilite range: 0 – 0 [ 0 – 0 ]

reference SNP: chr5:82861400

number of SNPs plotted: 3396

min P.value: 9.64E–26 [chr5:82861400]

max P.value: 10E–1 [chr5:83215254]

omitted GWAS Hits: chr5:83.260938–Mitochondrial DNA levels, NA

## GWAS Catalog SNPs in Region

| <b>chr</b> | <b>pos (Mb)</b> | <b>trait</b>                      | <b>snp</b> |
|------------|-----------------|-----------------------------------|------------|
| 5          | 82.81912        | Laryngeal squamous cell carcinoma | rs310518   |
| 5          | 82.84549        | Diisocyanate-induced asthma       | rs3852186  |
| 5          | 82.88991        | Major depressive disorder         | rs310501   |
| 5          | 82.96073        | Visceral fat                      | rs3846635  |
| 5          | 82.98574        | Prostate cancer                   | rs4466137  |
| 5          | 83.17359        | Ankylosing spondylitis            | rs4552569  |
| 5          | 83.26094        | Mitochondrial DNA levels          | rs2301070  |

# ProbtrackX\_L3\_ptr\_I

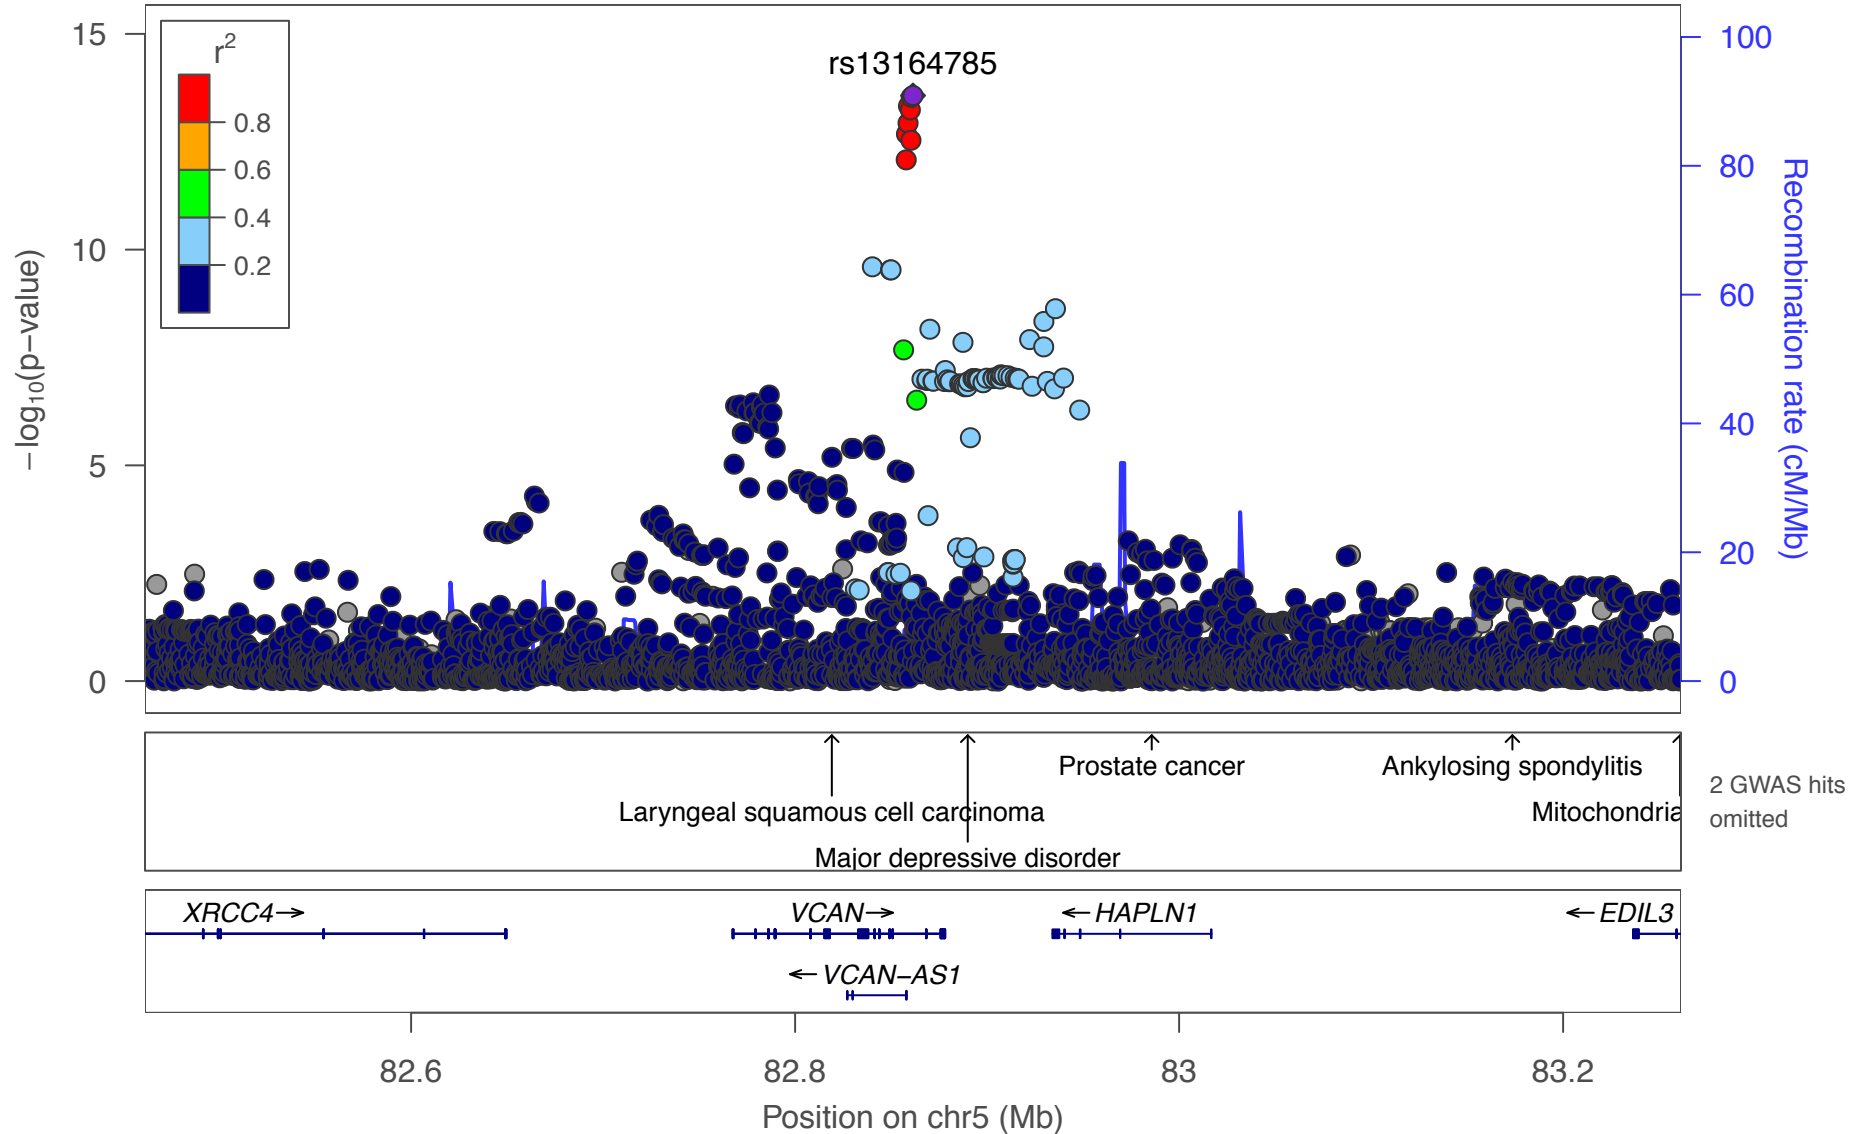



date: Thu Aug 17 17:58:12 2017

build: hg19

display range: chr5:82461400–83261400 [82461400–83261400]

hilite range: 0 – 0 [ 0 – 0 ]

reference SNP: chr5:82861400

number of SNPs plotted: 3396

min P.value: 2.69E–14 [chr5:82861400]

max P.value: 10E–1 [chr5:83012450]

omitted GWAS Hits: chr5:83.260938–Mitochondrial DNA levels, NA

## GWAS Catalog SNPs in Region

| <b>chr</b> | <b>pos (Mb)</b> | <b>trait</b>                      | <b>snp</b> |
|------------|-----------------|-----------------------------------|------------|
| 5          | 82.81912        | Laryngeal squamous cell carcinoma | rs310518   |
| 5          | 82.84549        | Diisocyanate-induced asthma       | rs3852186  |
| 5          | 82.88991        | Major depressive disorder         | rs310501   |
| 5          | 82.96073        | Visceral fat                      | rs3846635  |
| 5          | 82.98574        | Prostate cancer                   | rs4466137  |
| 5          | 83.17359        | Ankylosing spondylitis            | rs4552569  |
| 5          | 83.26094        | Mitochondrial DNA levels          | rs2301070  |

# ProbtrackX\_L3\_slf\_I

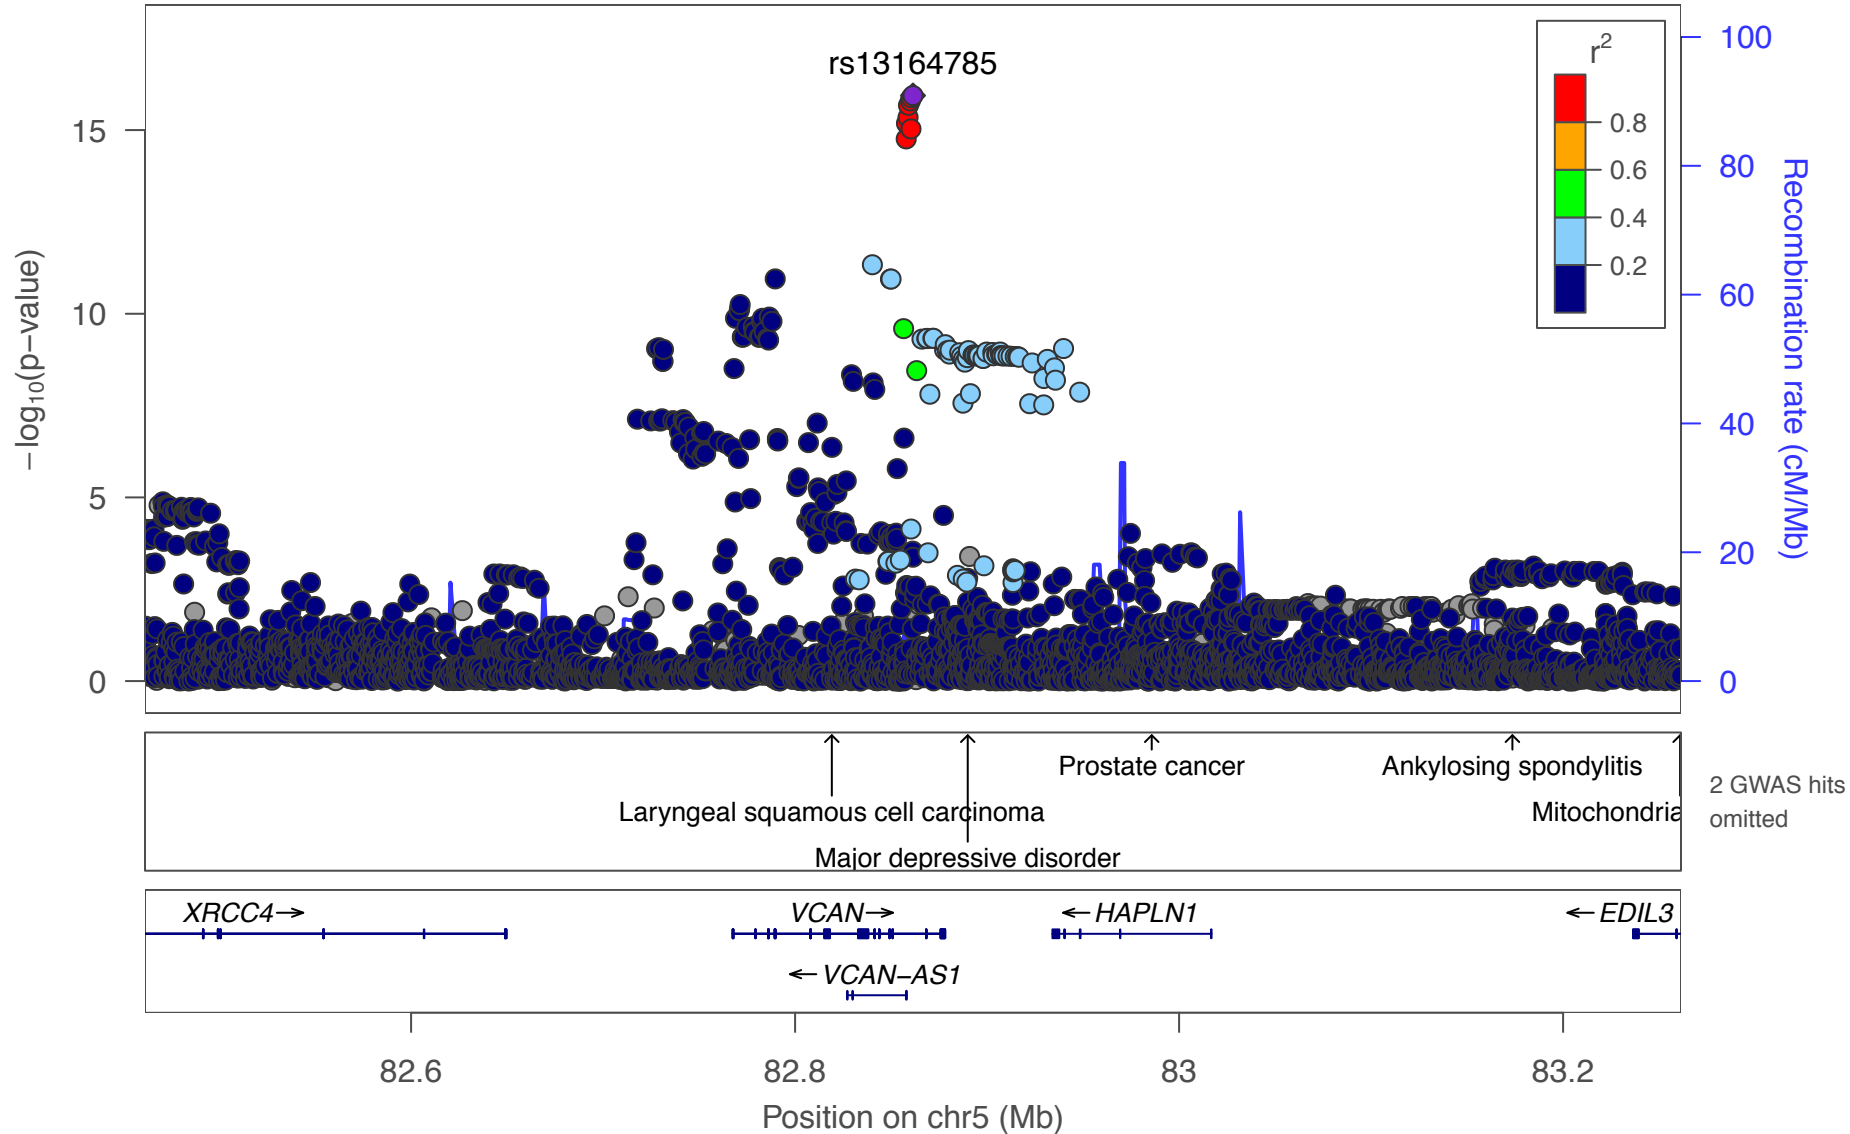

date: Thu Aug 17 17:58:12 2017

build: hg19

display range: chr5:82461400–83261400 [82461400–83261400]

hilite range: 0 – 0 [ 0 – 0 ]

reference SNP: chr5:82861400

number of SNPs plotted: 3396

min P.value: 1.15E–16 [chr5:82861400]

max P.value: 9.99E–1 [chr5:82834009]

omitted GWAS Hits: chr5:83.260938–Mitochondrial DNA levels, NA

## GWAS Catalog SNPs in Region

| <b>chr</b> | <b>pos (Mb)</b> | <b>trait</b>                      | <b>snp</b> |
|------------|-----------------|-----------------------------------|------------|
| 5          | 82.81912        | Laryngeal squamous cell carcinoma | rs310518   |
| 5          | 82.84549        | Diisocyanate-induced asthma       | rs3852186  |
| 5          | 82.88991        | Major depressive disorder         | rs310501   |
| 5          | 82.96073        | Visceral fat                      | rs3846635  |
| 5          | 82.98574        | Prostate cancer                   | rs4466137  |
| 5          | 83.17359        | Ankylosing spondylitis            | rs4552569  |
| 5          | 83.26094        | Mitochondrial DNA levels          | rs2301070  |

# ProbtrackX\_L3\_unc\_I

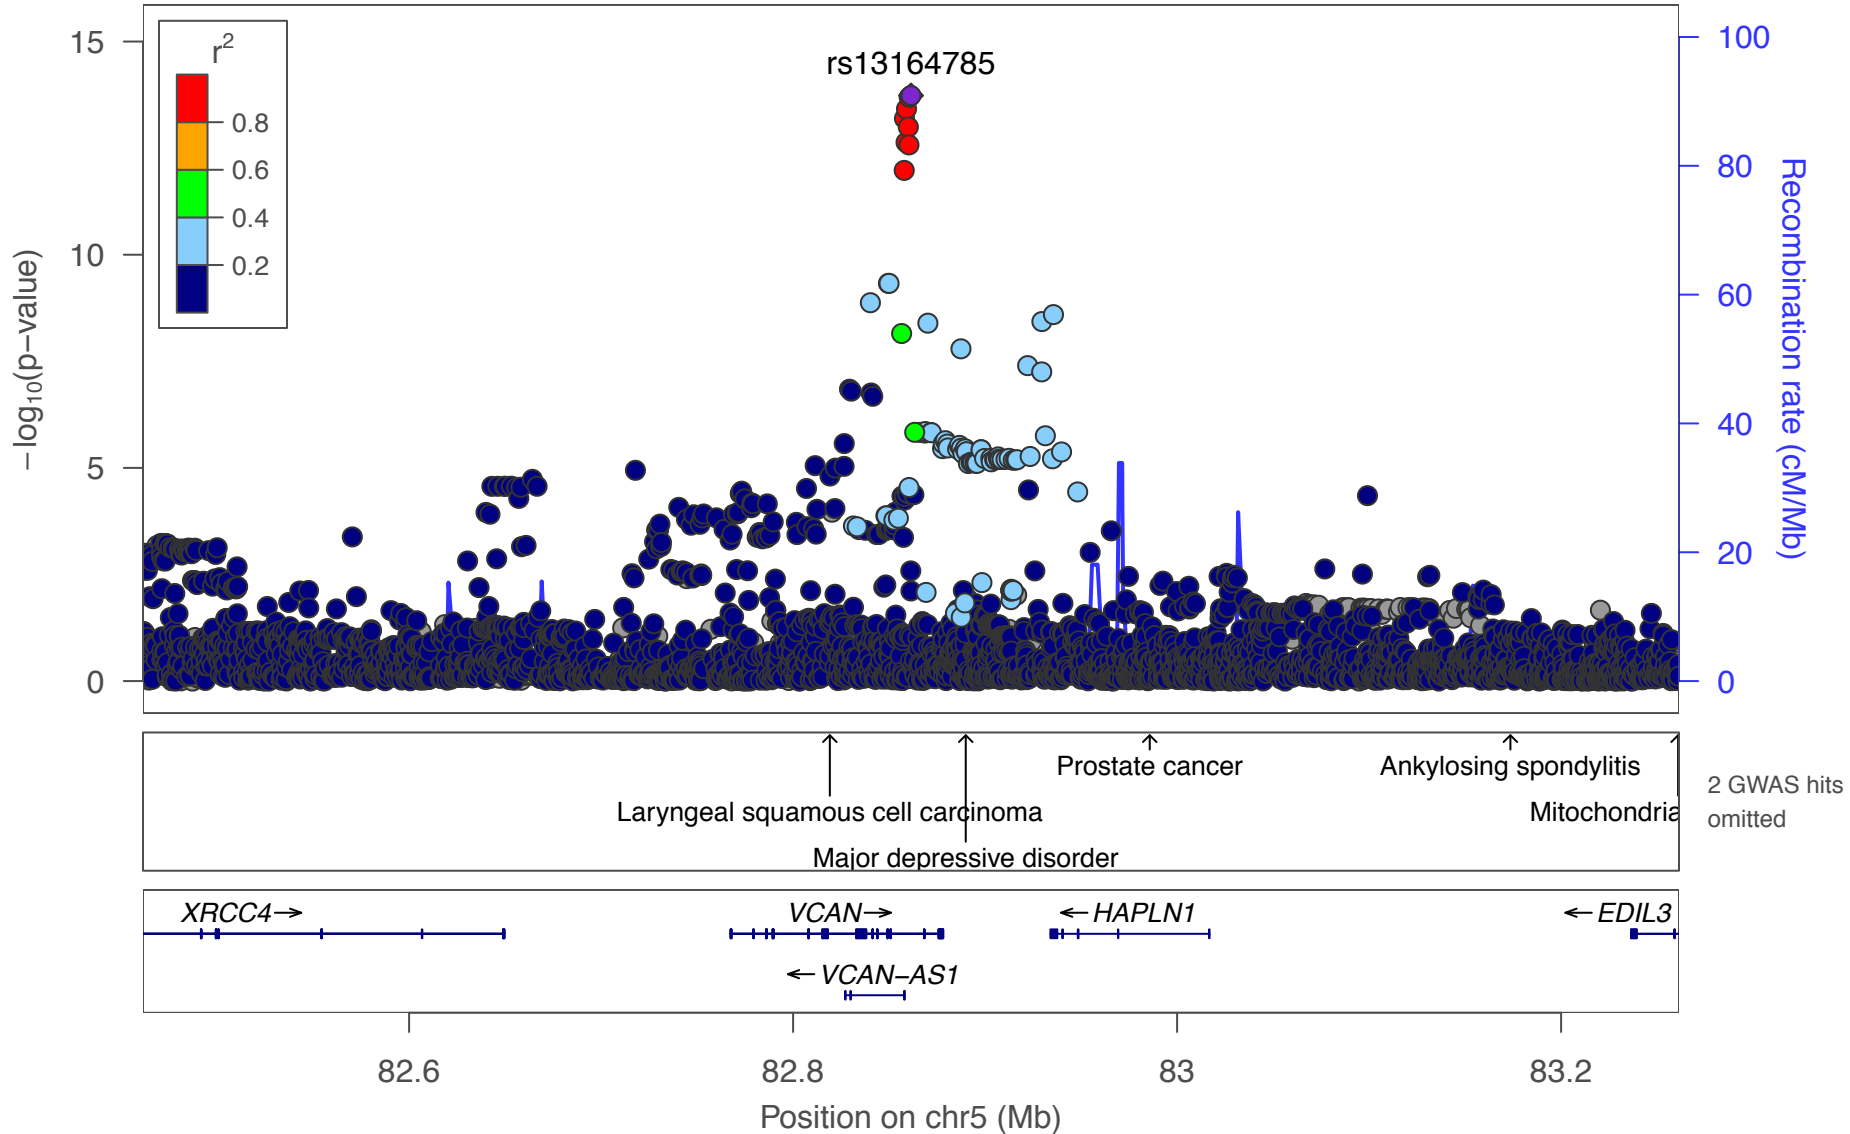

date: Thu Aug 17 17:58:12 2017

build: hg19

display range: chr5:82461400–83261400 [82461400–83261400]

hilite range: 0 – 0 [ 0 – 0 ]

reference SNP: chr5:82861400

number of SNPs plotted: 3396

min P.value: 1.85E–14 [chr5:82861400]

max P.value: 10E–1 [chr5:82526953]

omitted GWAS Hits: chr5:83.260938–Mitochondrial DNA levels, NA

## GWAS Catalog SNPs in Region

| <b>chr</b> | <b>pos (Mb)</b> | <b>trait</b>                      | <b>snp</b> |
|------------|-----------------|-----------------------------------|------------|
| 5          | 82.81912        | Laryngeal squamous cell carcinoma | rs310518   |
| 5          | 82.84549        | Diisocyanate-induced asthma       | rs3852186  |
| 5          | 82.88991        | Major depressive disorder         | rs310501   |
| 5          | 82.96073        | Visceral fat                      | rs3846635  |
| 5          | 82.98574        | Prostate cancer                   | rs4466137  |
| 5          | 83.17359        | Ankylosing spondylitis            | rs4552569  |
| 5          | 83.26094        | Mitochondrial DNA levels          | rs2301070  |



# ProtrackX\_L3\_unc\_r

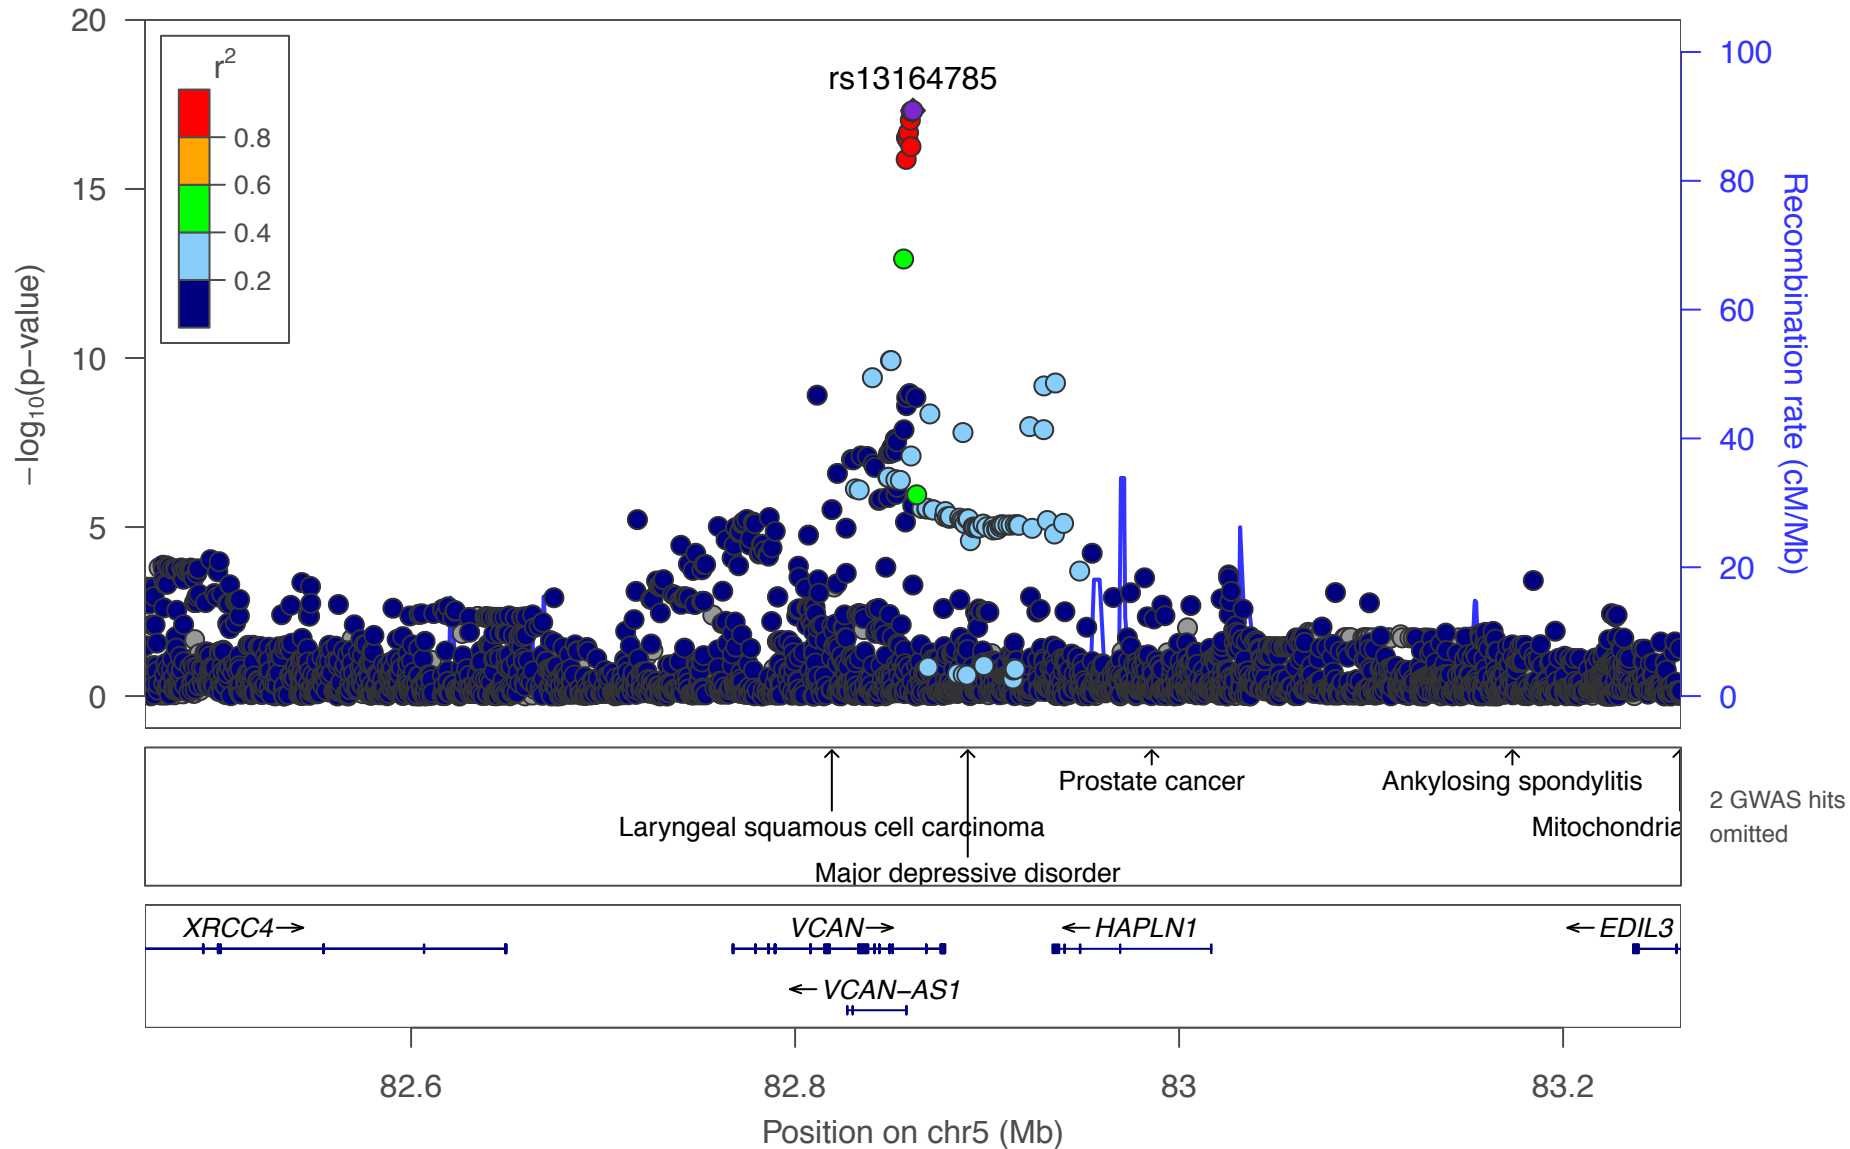

date: Thu Aug 17 17:58:12 2017

build: hg19

display range: chr5:82461400–83261400 [82461400–83261400]

hilite range: 0 – 0 [ 0 – 0 ]

reference SNP: chr5:82861400

number of SNPs plotted: 3396

min P.value: 4.79E–18 [chr5:82861400]

max P.value: 9.99E–1 [chr5:82782892]

omitted GWAS Hits: chr5:83.260938–Mitochondrial DNA levels, NA

## GWAS Catalog SNPs in Region

| <b>chr</b> | <b>pos (Mb)</b> | <b>trait</b>                      | <b>snp</b> |
|------------|-----------------|-----------------------------------|------------|
| 5          | 82.81912        | Laryngeal squamous cell carcinoma | rs310518   |
| 5          | 82.84549        | Diisocyanate-induced asthma       | rs3852186  |
| 5          | 82.88991        | Major depressive disorder         | rs310501   |
| 5          | 82.96073        | Visceral fat                      | rs3846635  |
| 5          | 82.98574        | Prostate cancer                   | rs4466137  |
| 5          | 83.17359        | Ankylosing spondylitis            | rs4552569  |
| 5          | 83.26094        | Mitochondrial DNA levels          | rs2301070  |

# ProbtrackX\_ICVF\_ar\_I

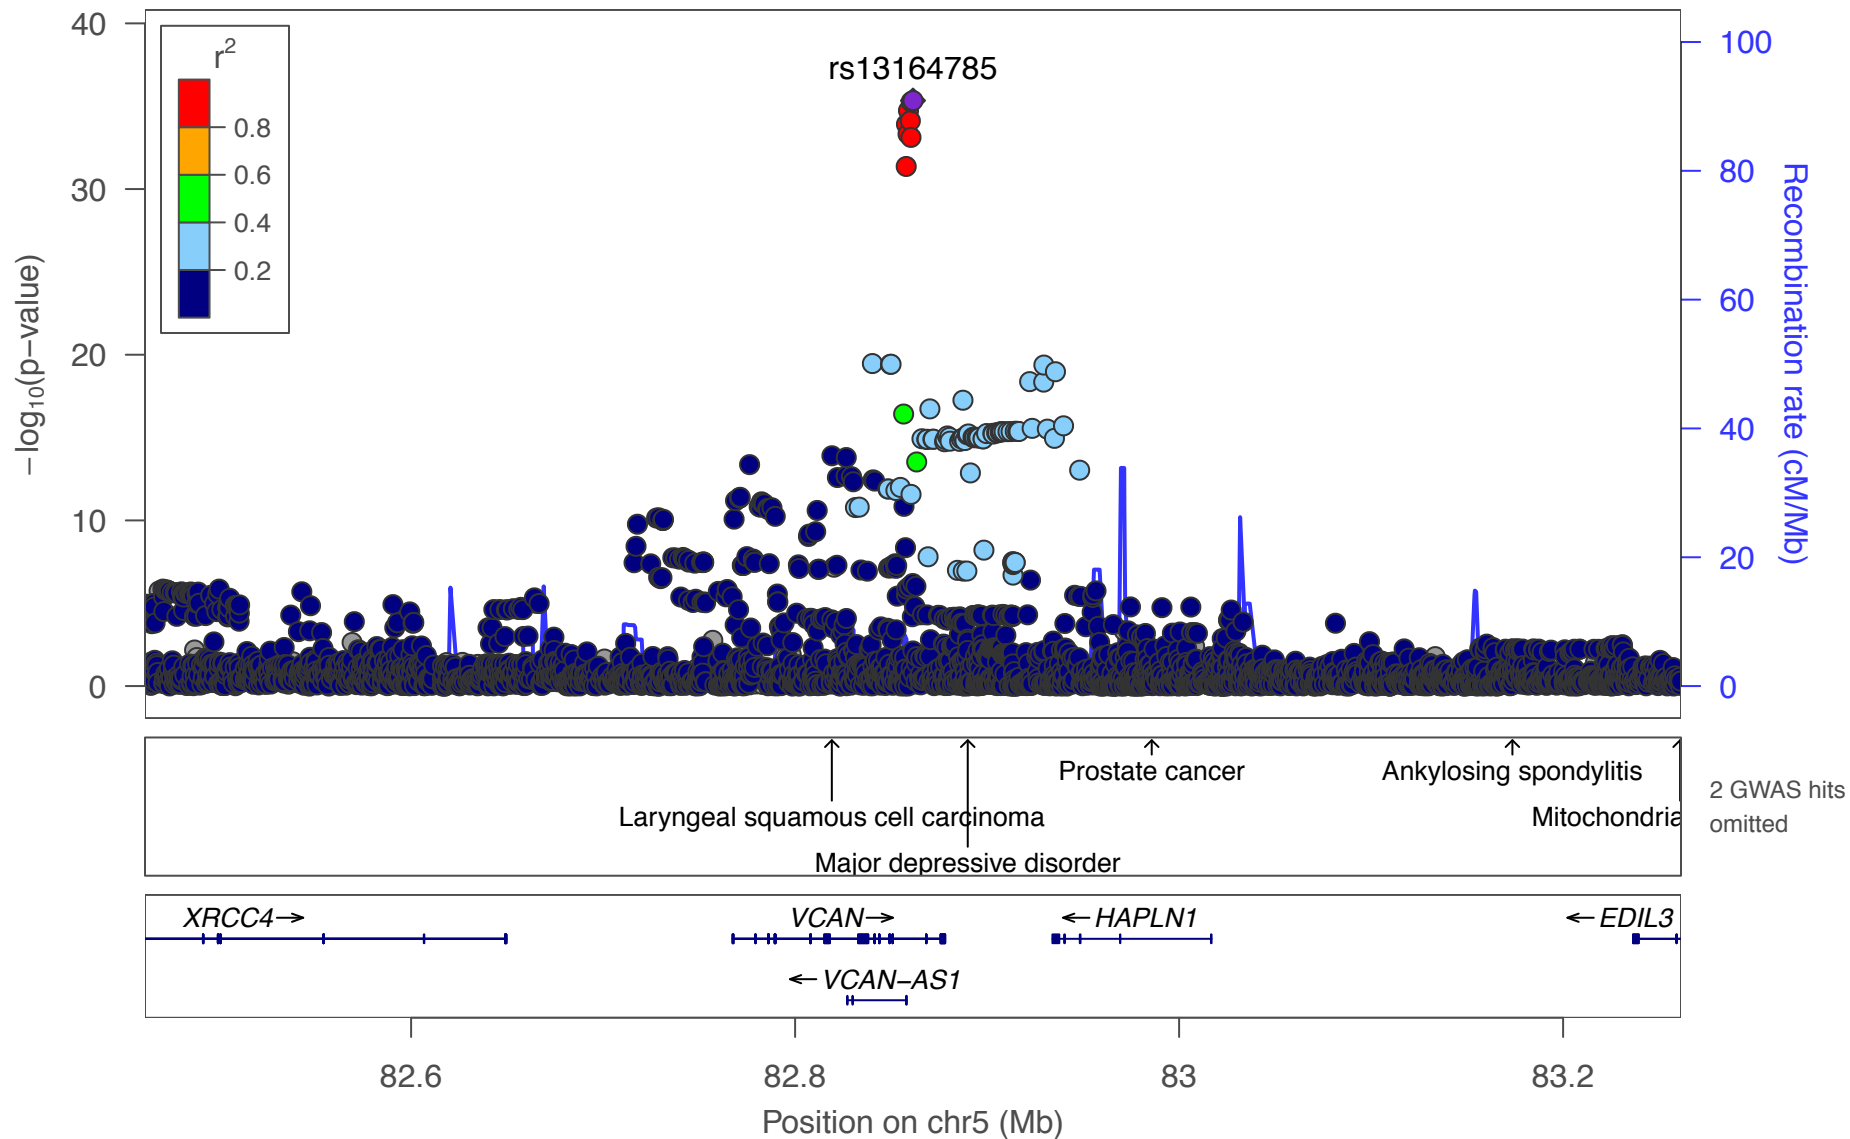

date: Thu Aug 17 17:58:12 2017

build: hg19

display range: chr5:82461400–83261400 [82461400–83261400]

hilite range: 0 – 0 [ 0 – 0 ]

reference SNP: chr5:82861400

number of SNPs plotted: 3396

min P.value: 4.55E–36 [chr5:82861400]

max P.value: 9.99E–1 [chr5:83165588]

omitted GWAS Hits: chr5:83.260938–Mitochondrial DNA levels, NA

## GWAS Catalog SNPs in Region

| <b>chr</b> | <b>pos (Mb)</b> | <b>trait</b>                      | <b>snp</b> |
|------------|-----------------|-----------------------------------|------------|
| 5          | 82.81912        | Laryngeal squamous cell carcinoma | rs310518   |
| 5          | 82.84549        | Diisocyanate-induced asthma       | rs3852186  |
| 5          | 82.88991        | Major depressive disorder         | rs310501   |
| 5          | 82.96073        | Visceral fat                      | rs3846635  |
| 5          | 82.98574        | Prostate cancer                   | rs4466137  |
| 5          | 83.17359        | Ankylosing spondylitis            | rs4552569  |
| 5          | 83.26094        | Mitochondrial DNA levels          | rs2301070  |

# ProbtrackX\_ICVF\_ar\_r

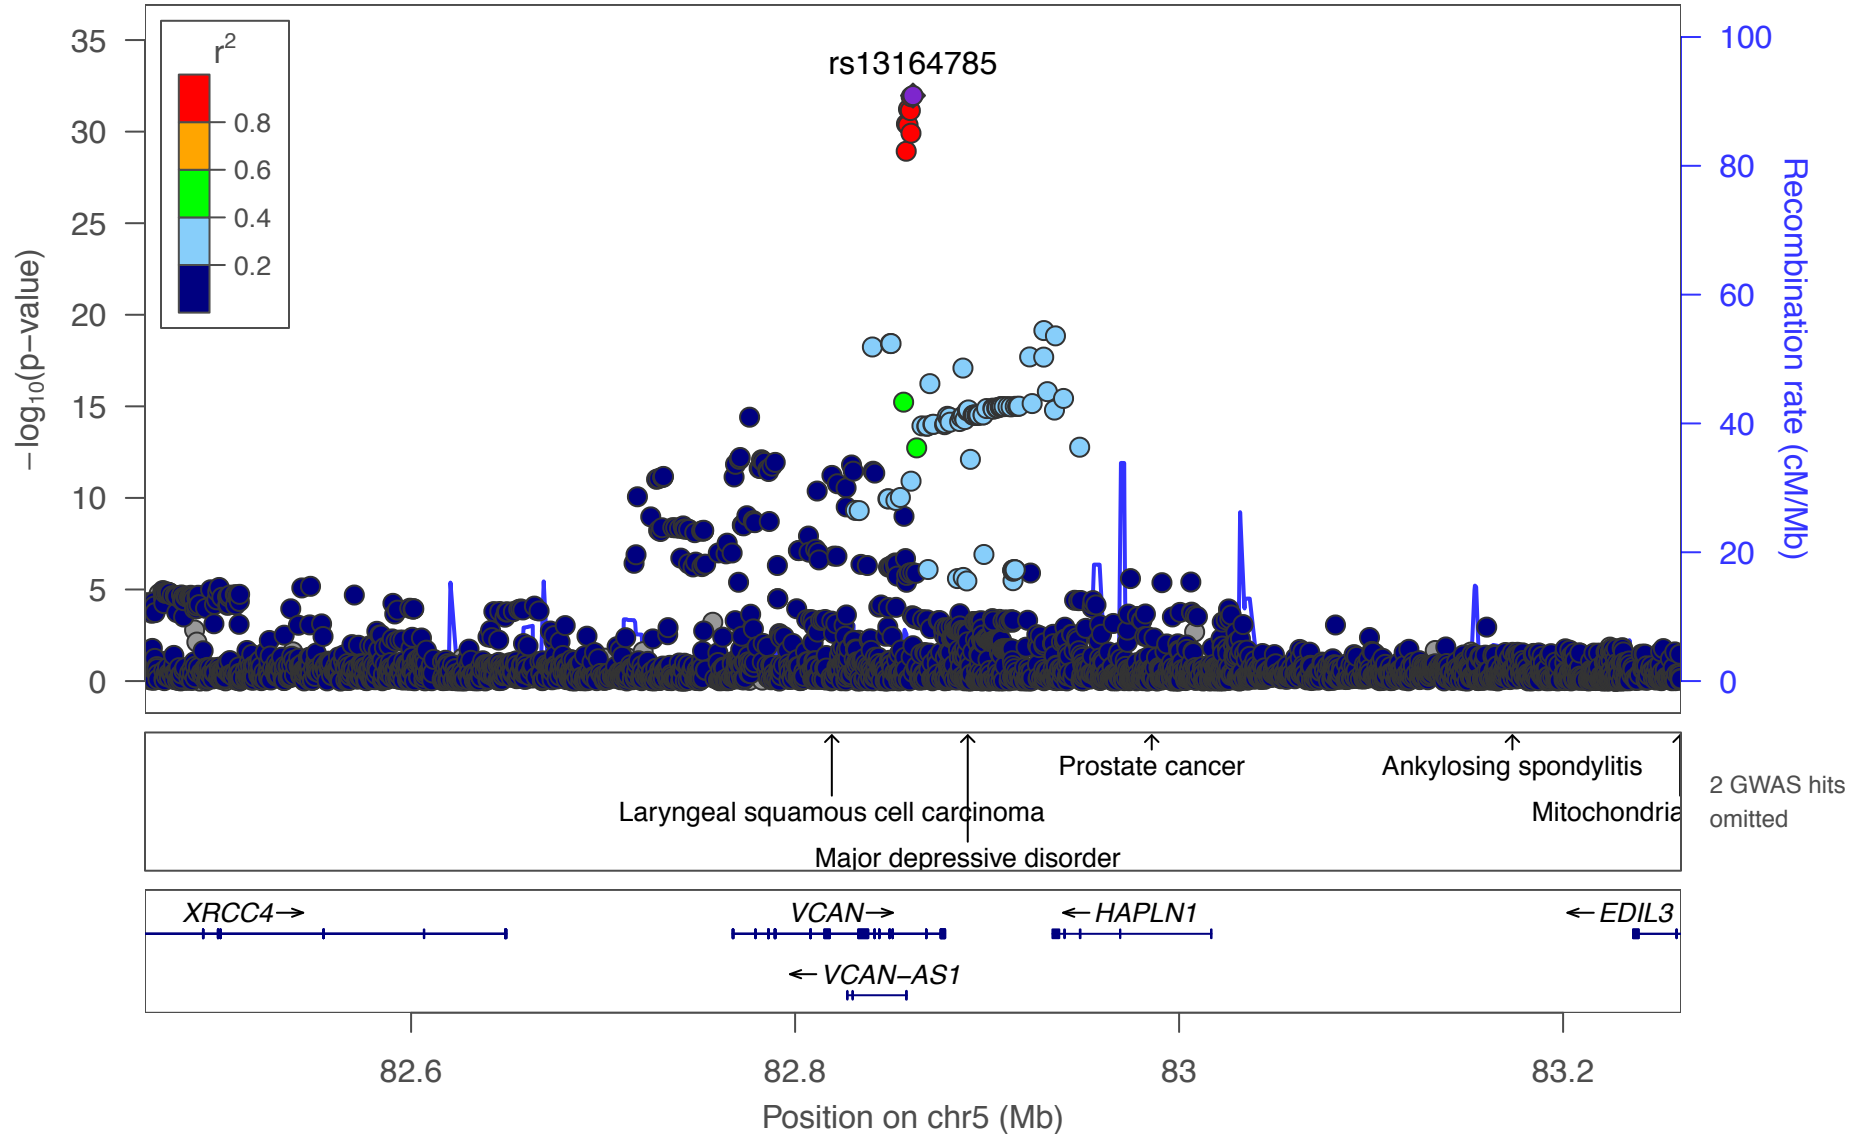

date: Thu Aug 17 17:58:12 2017

build: hg19

display range: chr5:82461400–83261400 [82461400–83261400]

hilite range: 0 – 0 [ 0 – 0 ]

reference SNP: chr5:82861400

number of SNPs plotted: 3396

min P.value: 1.07E–32 [chr5:82861400]

max P.value: 10E–1 [chr5:83227145]

omitted GWAS Hits: chr5:83.260938–Mitochondrial DNA levels, NA



## GWAS Catalog SNPs in Region

| <b>chr</b> | <b>pos (Mb)</b> | <b>trait</b>                      | <b>snp</b> |
|------------|-----------------|-----------------------------------|------------|
| 5          | 82.81912        | Laryngeal squamous cell carcinoma | rs310518   |
| 5          | 82.84549        | Diisocyanate-induced asthma       | rs3852186  |
| 5          | 82.88991        | Major depressive disorder         | rs310501   |
| 5          | 82.96073        | Visceral fat                      | rs3846635  |
| 5          | 82.98574        | Prostate cancer                   | rs4466137  |
| 5          | 83.17359        | Ankylosing spondylitis            | rs4552569  |
| 5          | 83.26094        | Mitochondrial DNA levels          | rs2301070  |

# ProbtrackX\_ICVF\_atr\_I

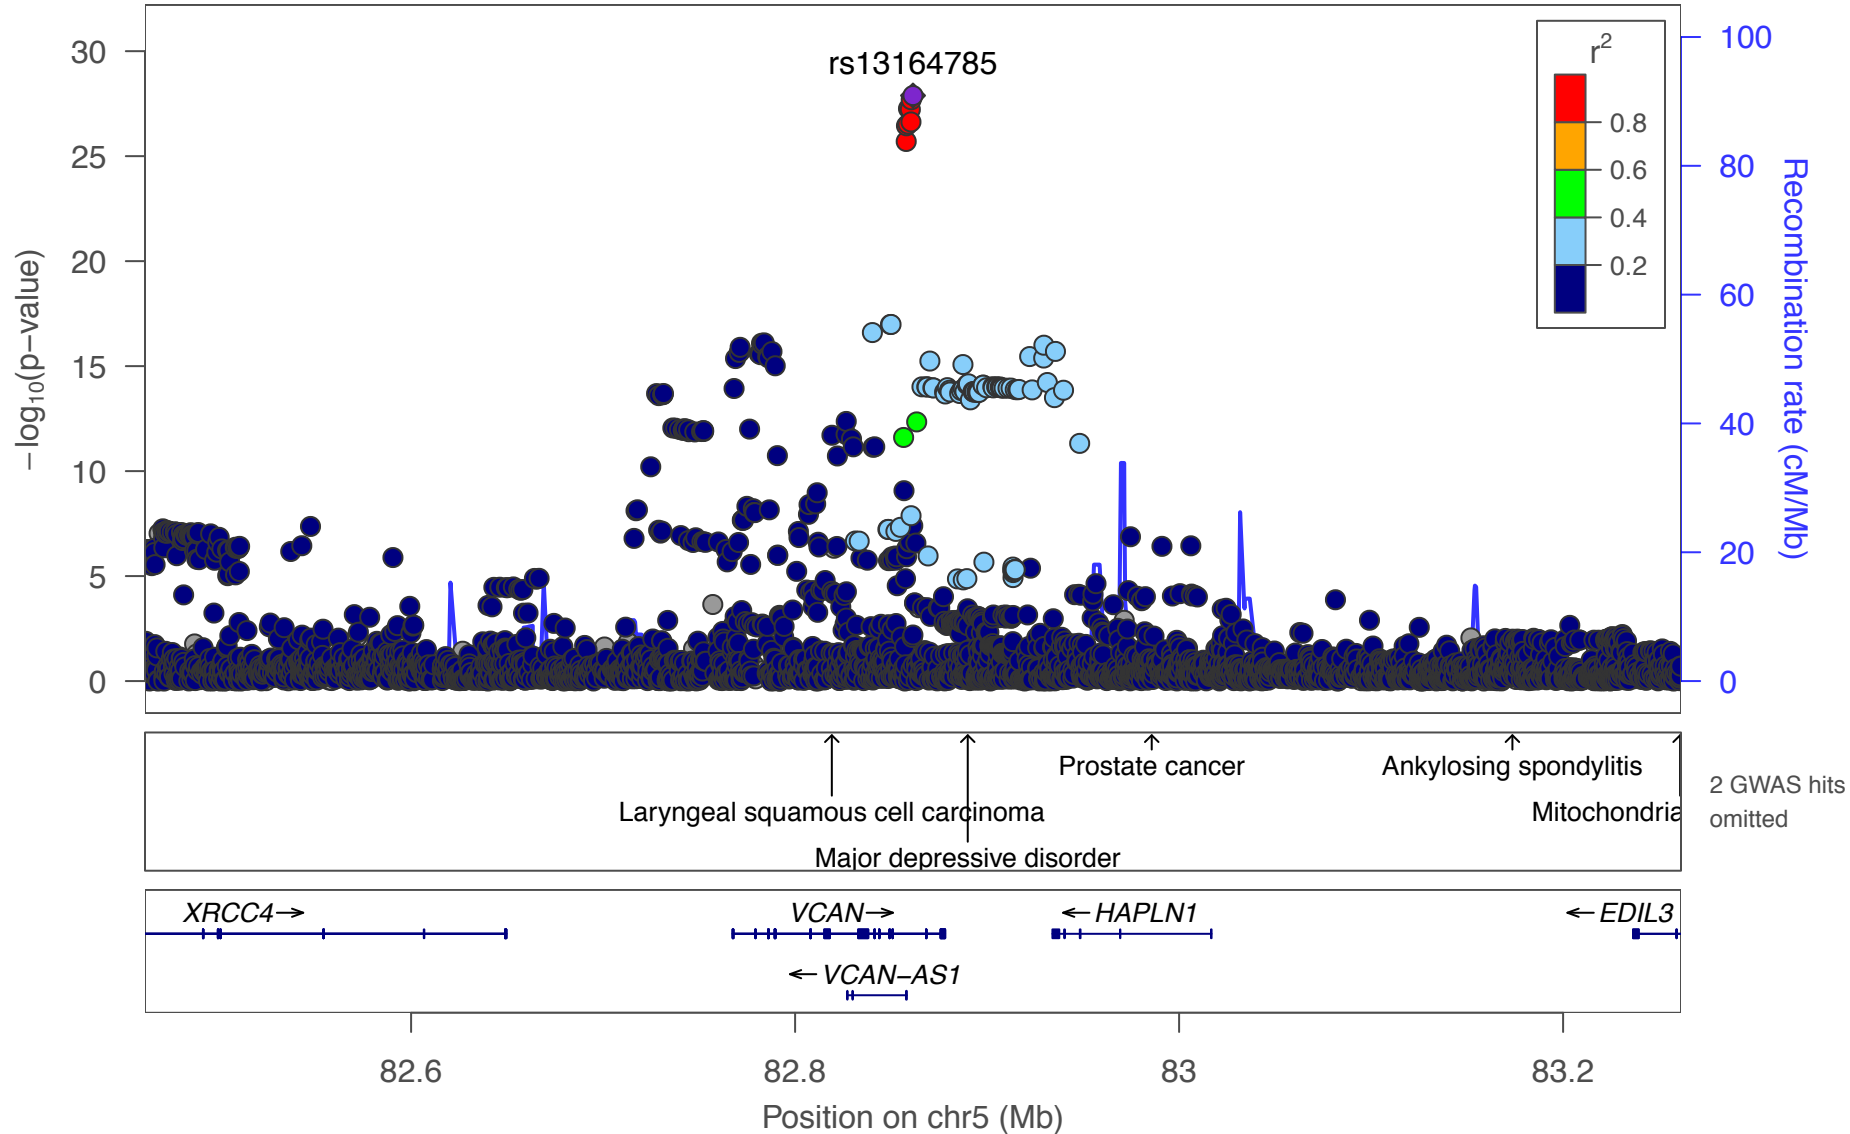

date: Thu Aug 17 17:58:12 2017

build: hg19

display range: chr5:82461400–83261400 [82461400–83261400]

hilite range: 0 – 0 [ 0 – 0 ]

reference SNP: chr5:82861400

number of SNPs plotted: 3396

min P.value: 1.3E–28 [chr5:82861400]

max P.value: 9.99E–1 [chr5:82791833]

omitted GWAS Hits: chr5:83.260938–Mitochondrial DNA levels, NA

## GWAS Catalog SNPs in Region

| <b>chr</b> | <b>pos (Mb)</b> | <b>trait</b>                      | <b>snp</b> |
|------------|-----------------|-----------------------------------|------------|
| 5          | 82.81912        | Laryngeal squamous cell carcinoma | rs310518   |
| 5          | 82.84549        | Diisocyanate-induced asthma       | rs3852186  |
| 5          | 82.88991        | Major depressive disorder         | rs310501   |
| 5          | 82.96073        | Visceral fat                      | rs3846635  |
| 5          | 82.98574        | Prostate cancer                   | rs4466137  |
| 5          | 83.17359        | Ankylosing spondylitis            | rs4552569  |
| 5          | 83.26094        | Mitochondrial DNA levels          | rs2301070  |

# ProbtrackX\_ICVF\_atr\_r

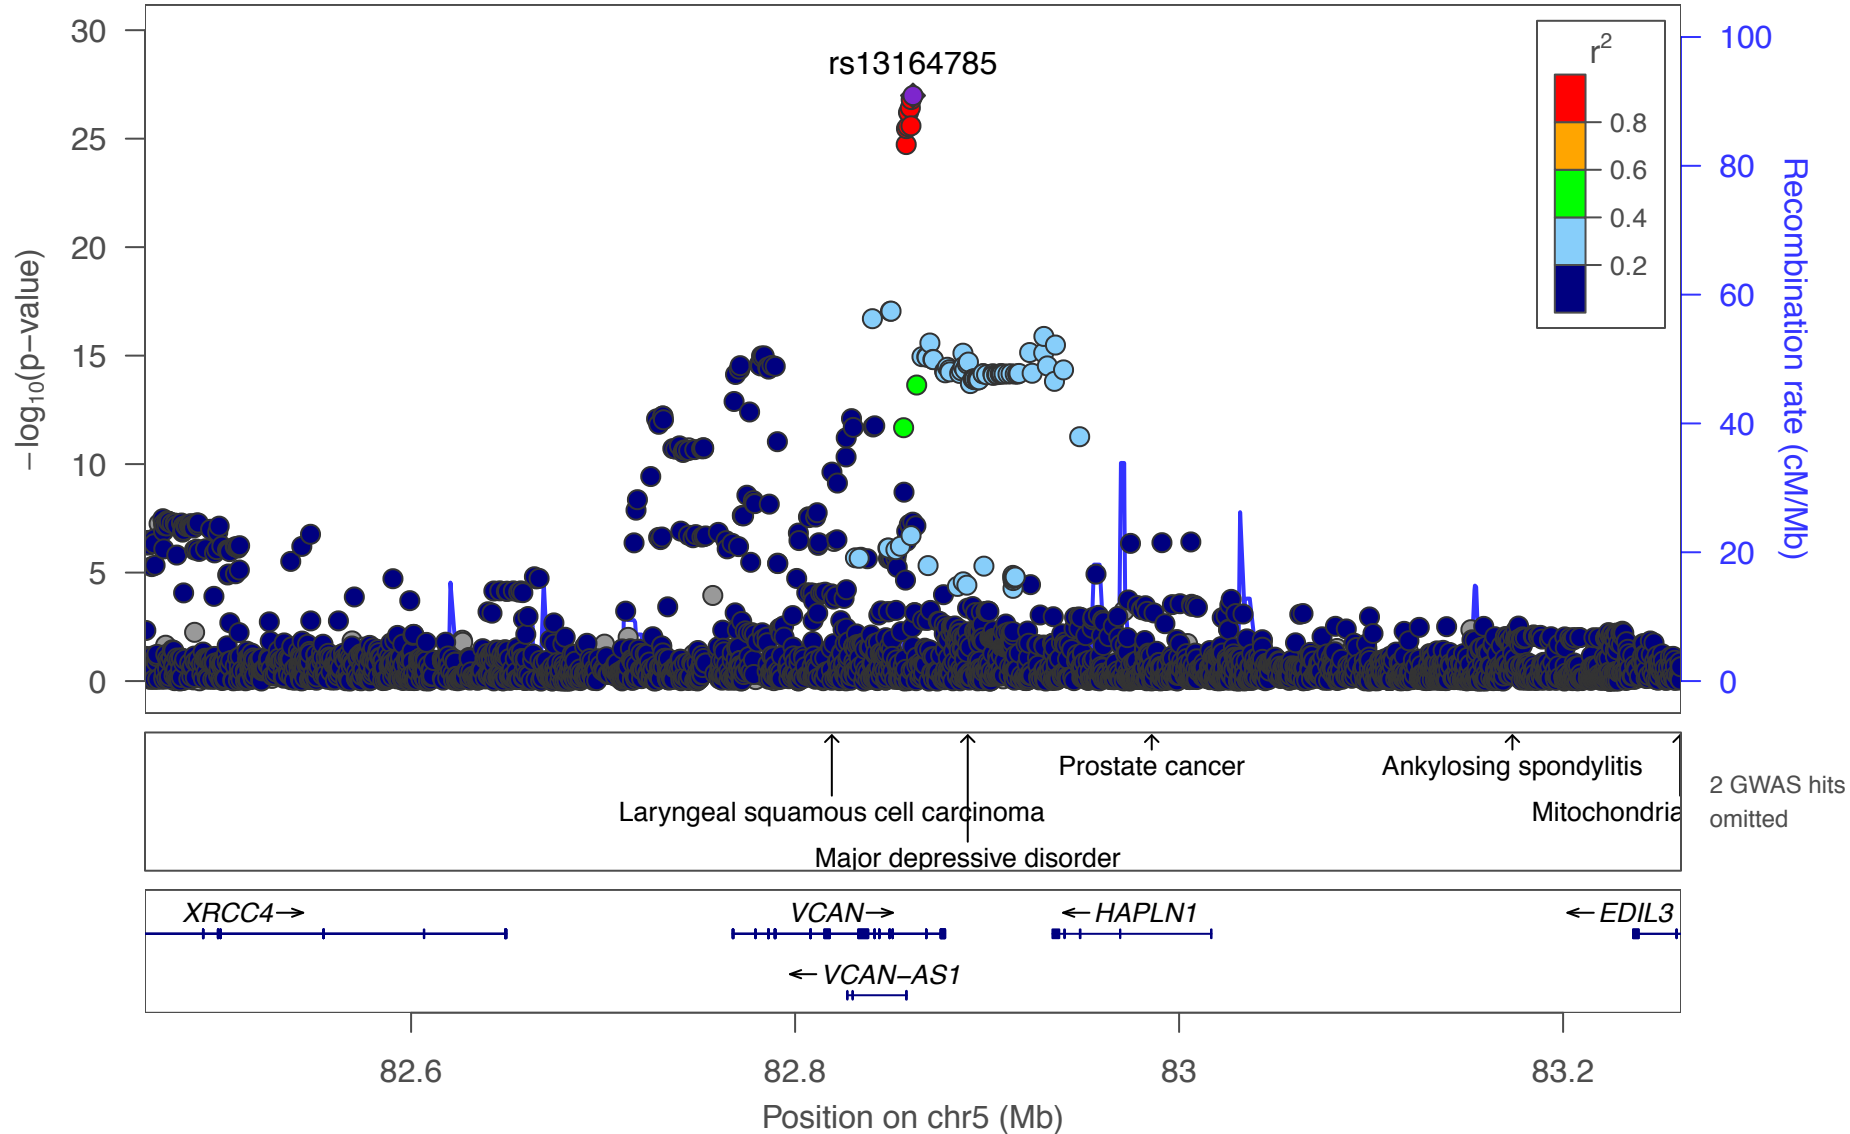

date: Thu Aug 17 17:58:12 2017

build: hg19

display range: chr5:82461400–83261400 [82461400–83261400]

hilite range: 0 – 0 [ 0 – 0 ]

reference SNP: chr5:82861400

number of SNPs plotted: 3396

min P.value: 1.03E–27 [chr5:82861400]

max P.value: 9.99E–1 [chr5:83159644]

omitted GWAS Hits: chr5:83.260938–Mitochondrial DNA levels, NA

## GWAS Catalog SNPs in Region

| <b>chr</b> | <b>pos (Mb)</b> | <b>trait</b>                      | <b>snp</b> |
|------------|-----------------|-----------------------------------|------------|
| 5          | 82.81912        | Laryngeal squamous cell carcinoma | rs310518   |
| 5          | 82.84549        | Diisocyanate-induced asthma       | rs3852186  |
| 5          | 82.88991        | Major depressive disorder         | rs310501   |
| 5          | 82.96073        | Visceral fat                      | rs3846635  |
| 5          | 82.98574        | Prostate cancer                   | rs4466137  |
| 5          | 83.17359        | Ankylosing spondylitis            | rs4552569  |
| 5          | 83.26094        | Mitochondrial DNA levels          | rs2301070  |

# ProbtrackX\_ICVF\_cgh\_I

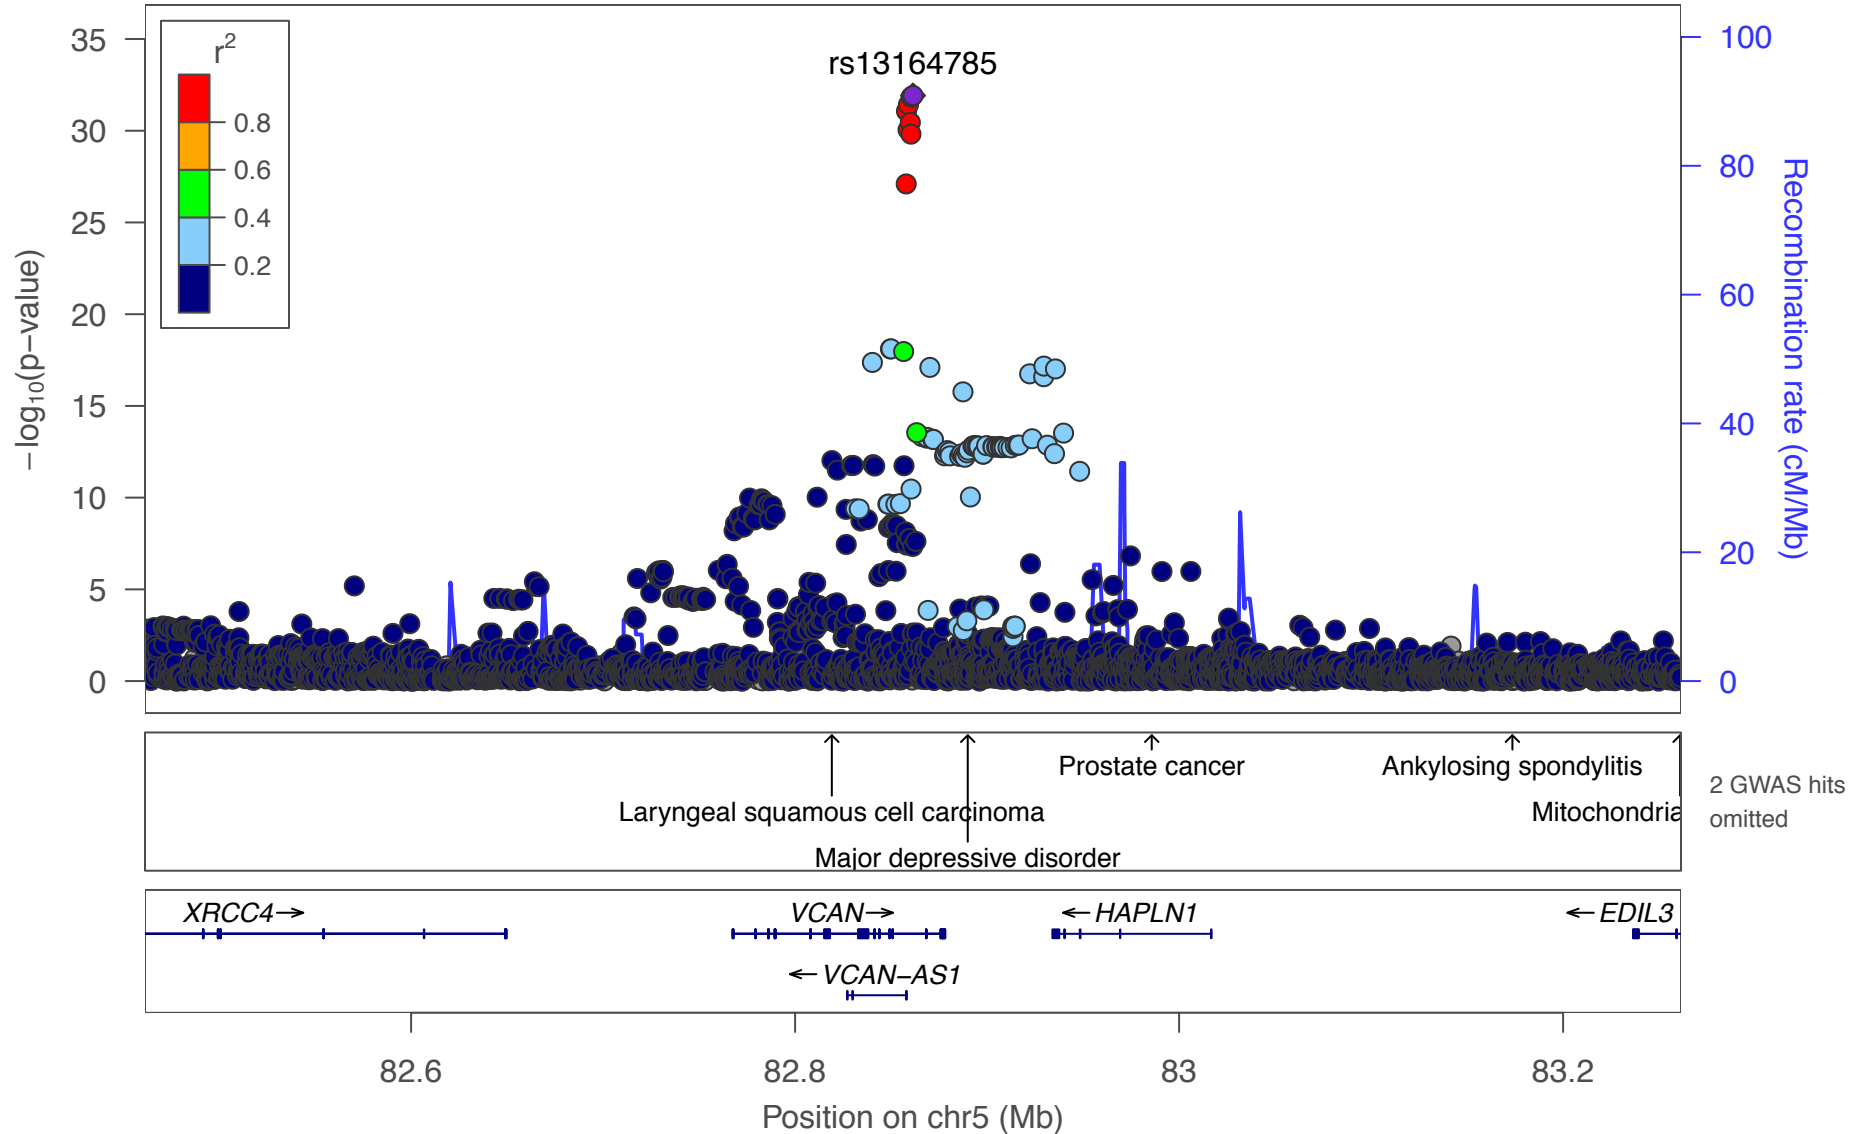



date: Thu Aug 17 17:58:12 2017

build: hg19

display range: chr5:82461400–83261400 [82461400–83261400]

hilite range: 0 – 0 [ 0 – 0 ]

reference SNP: chr5:82861400

number of SNPs plotted: 3396

min P.value: 1.21E–32 [chr5:82861400]

max P.value: 10E–1 [chr5:82951885]

omitted GWAS Hits: chr5:83.260938–Mitochondrial DNA levels, NA

## GWAS Catalog SNPs in Region

| <b>chr</b> | <b>pos (Mb)</b> | <b>trait</b>                      | <b>snp</b> |
|------------|-----------------|-----------------------------------|------------|
| 5          | 82.81912        | Laryngeal squamous cell carcinoma | rs310518   |
| 5          | 82.84549        | Diisocyanate-induced asthma       | rs3852186  |
| 5          | 82.88991        | Major depressive disorder         | rs310501   |
| 5          | 82.96073        | Visceral fat                      | rs3846635  |
| 5          | 82.98574        | Prostate cancer                   | rs4466137  |
| 5          | 83.17359        | Ankylosing spondylitis            | rs4552569  |
| 5          | 83.26094        | Mitochondrial DNA levels          | rs2301070  |

# ProbtrackX\_ICVF\_cgh\_r

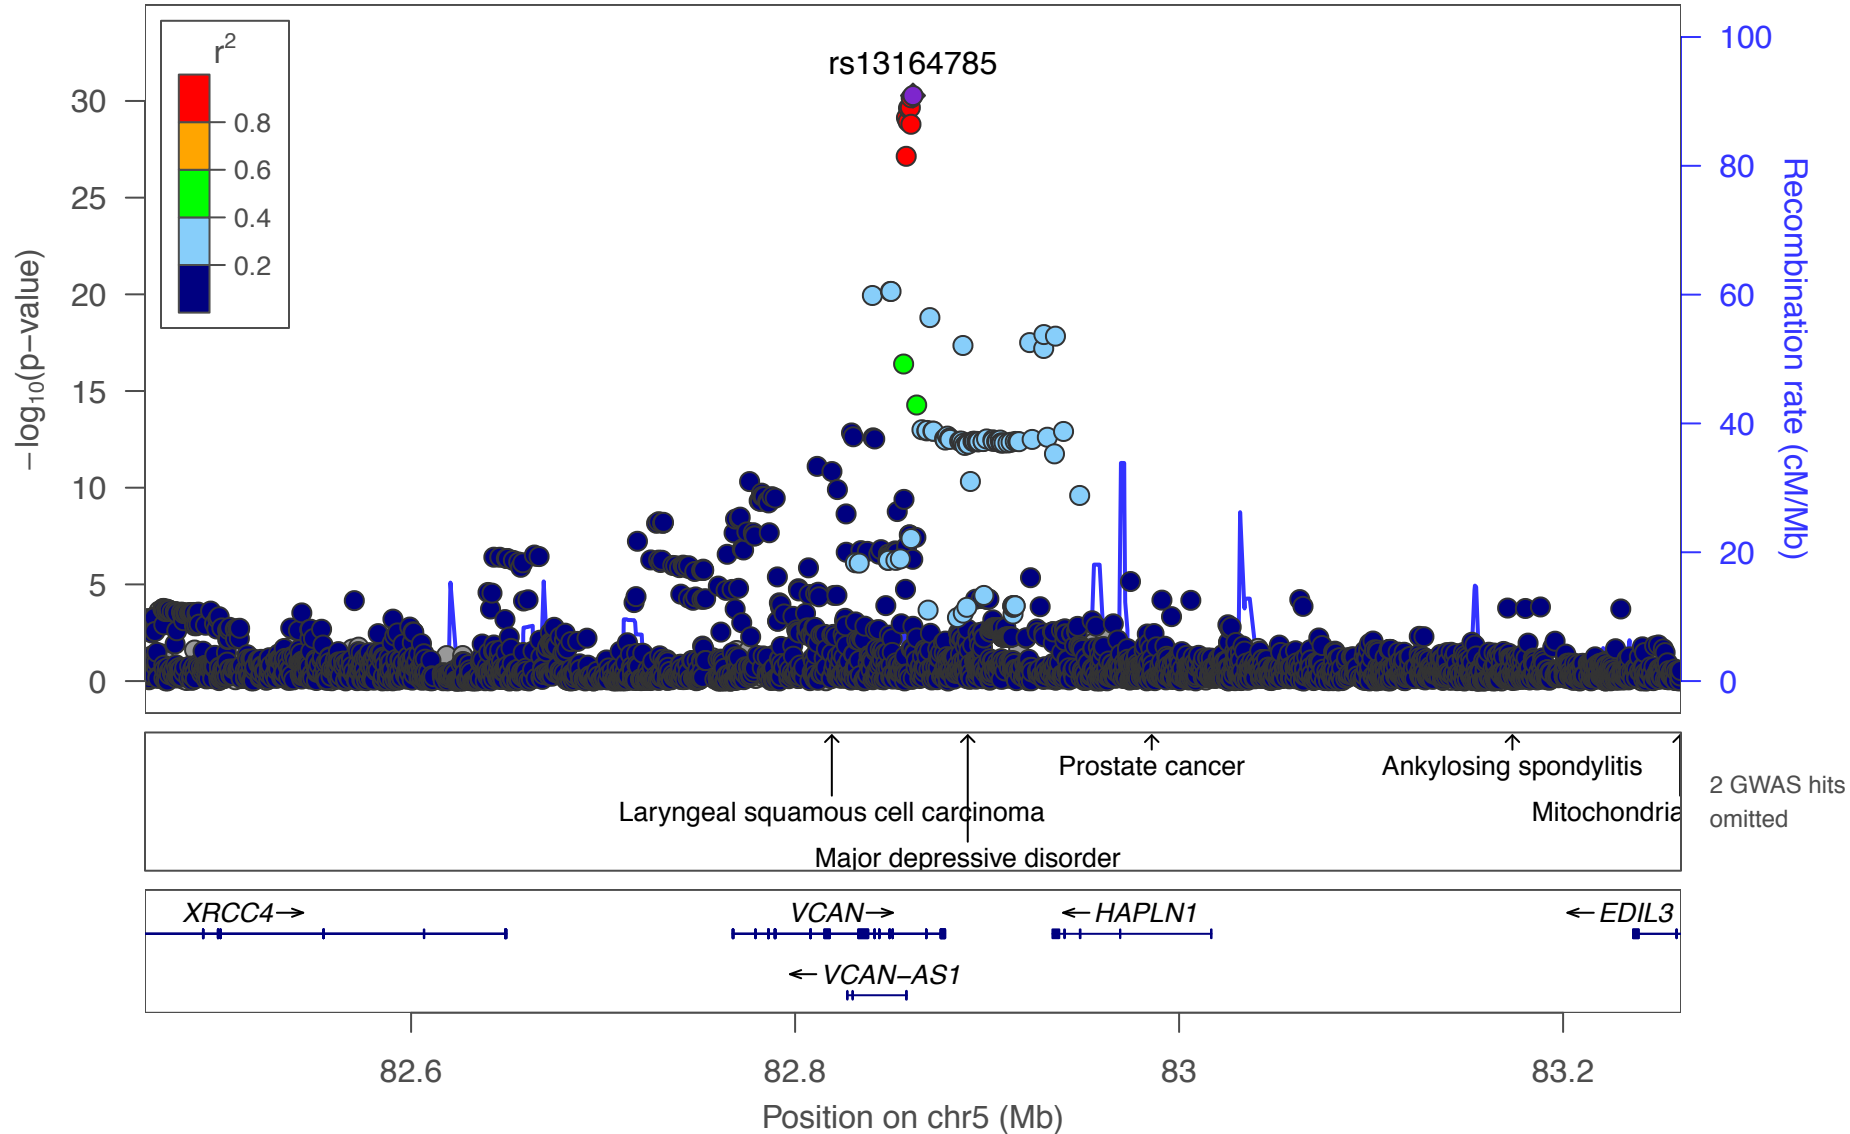

date: Thu Aug 17 17:58:12 2017

build: hg19

display range: chr5:82461400–83261400 [82461400–83261400]

hilite range: 0 – 0 [ 0 – 0 ]

reference SNP: chr5:82861400

number of SNPs plotted: 3396

min P.value: 5.25E–31 [chr5:82861400]

max P.value: 9.98E–1 [chr5:83243278]

omitted GWAS Hits: chr5:83.260938–Mitochondrial DNA levels, NA

## GWAS Catalog SNPs in Region

| <b>chr</b> | <b>pos (Mb)</b> | <b>trait</b>                      | <b>snp</b> |
|------------|-----------------|-----------------------------------|------------|
| 5          | 82.81912        | Laryngeal squamous cell carcinoma | rs310518   |
| 5          | 82.84549        | Diisocyanate-induced asthma       | rs3852186  |
| 5          | 82.88991        | Major depressive disorder         | rs310501   |
| 5          | 82.96073        | Visceral fat                      | rs3846635  |
| 5          | 82.98574        | Prostate cancer                   | rs4466137  |
| 5          | 83.17359        | Ankylosing spondylitis            | rs4552569  |
| 5          | 83.26094        | Mitochondrial DNA levels          | rs2301070  |

# ProbtrackX\_ICVF\_cst\_I

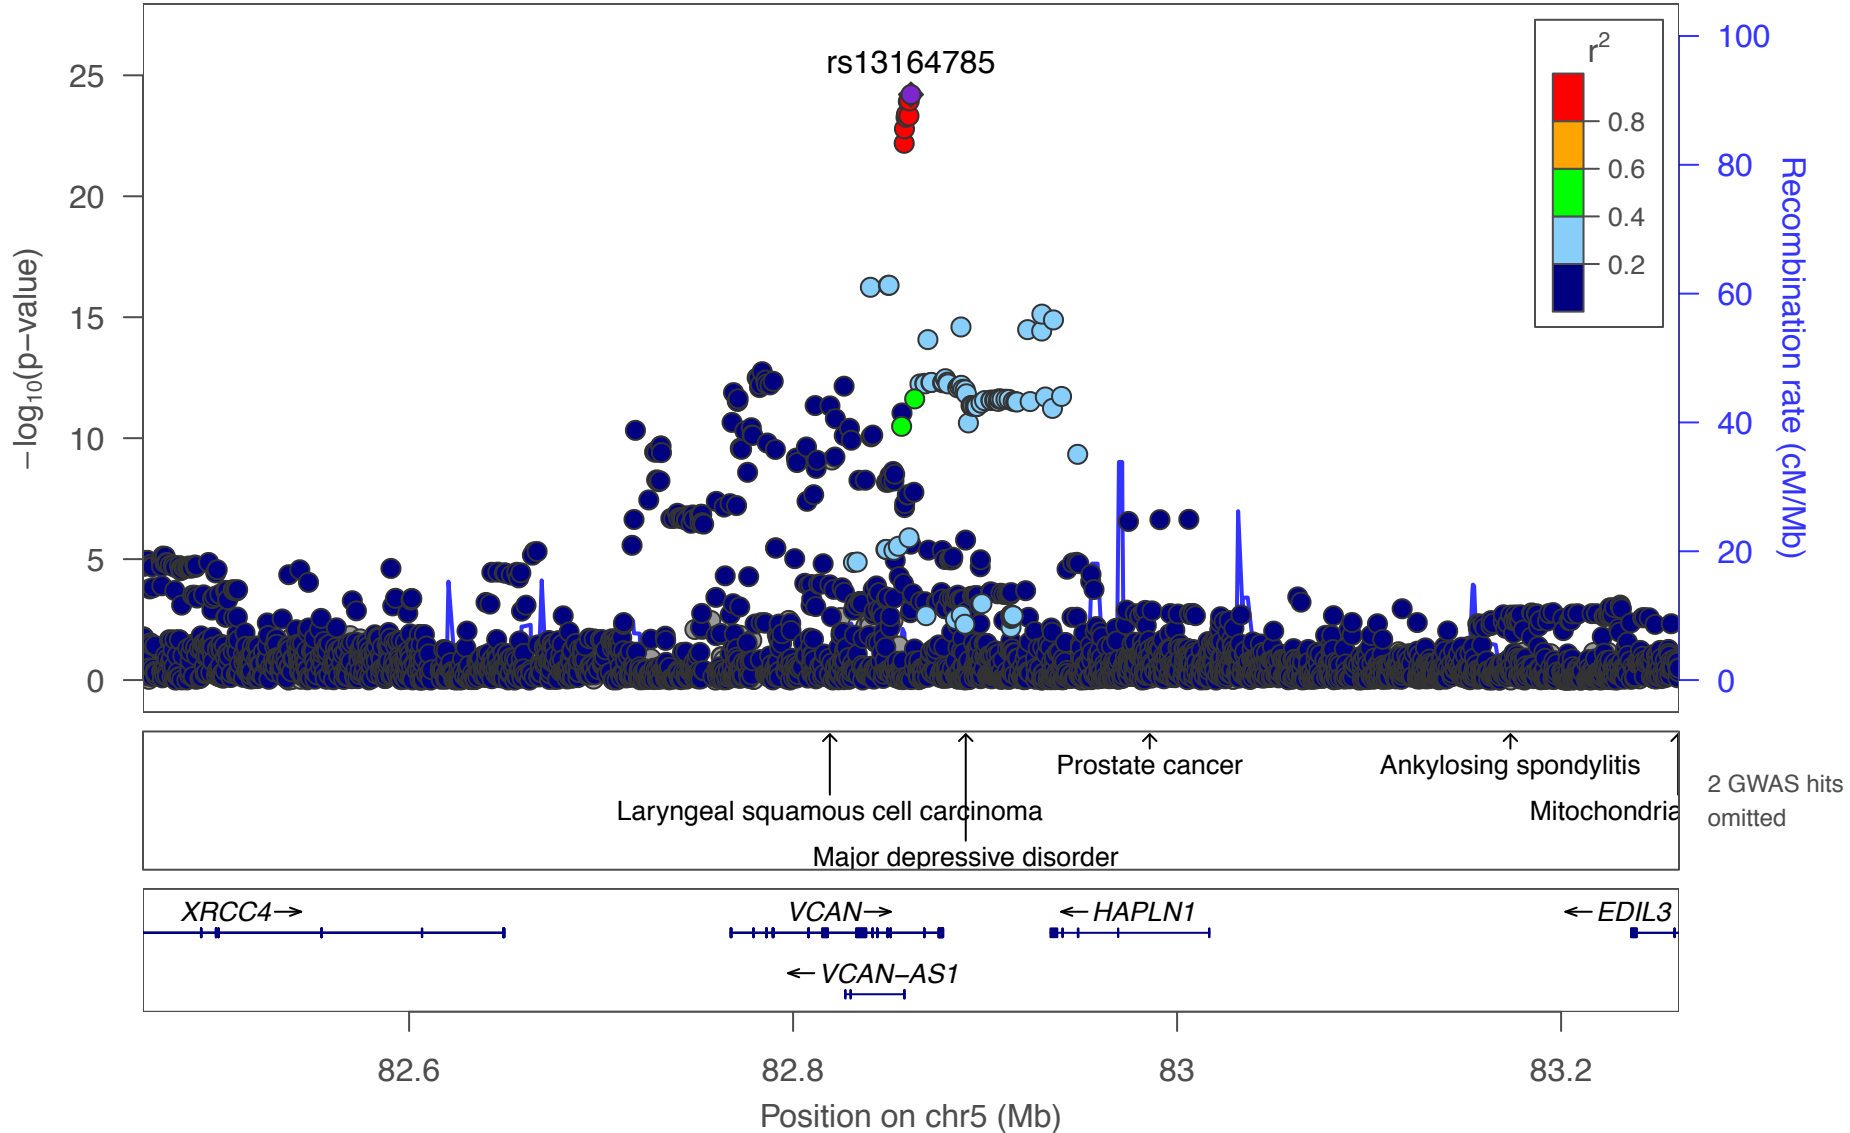

date: Thu Aug 17 17:58:12 2017

build: hg19

display range: chr5:82461400–83261400 [82461400–83261400]

hilite range: 0 – 0 [ 0 – 0 ]

reference SNP: chr5:82861400

number of SNPs plotted: 3396

min P.value: 6.24E–25 [chr5:82861400]

max P.value: 10E–1 [chr5:82605654]

omitted GWAS Hits: chr5:83.260938–Mitochondrial DNA levels, NA

## GWAS Catalog SNPs in Region

| <b>chr</b> | <b>pos (Mb)</b> | <b>trait</b>                      | <b>snp</b> |
|------------|-----------------|-----------------------------------|------------|
| 5          | 82.81912        | Laryngeal squamous cell carcinoma | rs310518   |
| 5          | 82.84549        | Diisocyanate-induced asthma       | rs3852186  |
| 5          | 82.88991        | Major depressive disorder         | rs310501   |
| 5          | 82.96073        | Visceral fat                      | rs3846635  |
| 5          | 82.98574        | Prostate cancer                   | rs4466137  |
| 5          | 83.17359        | Ankylosing spondylitis            | rs4552569  |
| 5          | 83.26094        | Mitochondrial DNA levels          | rs2301070  |



# ProbtrackX\_ICVF\_cst\_r

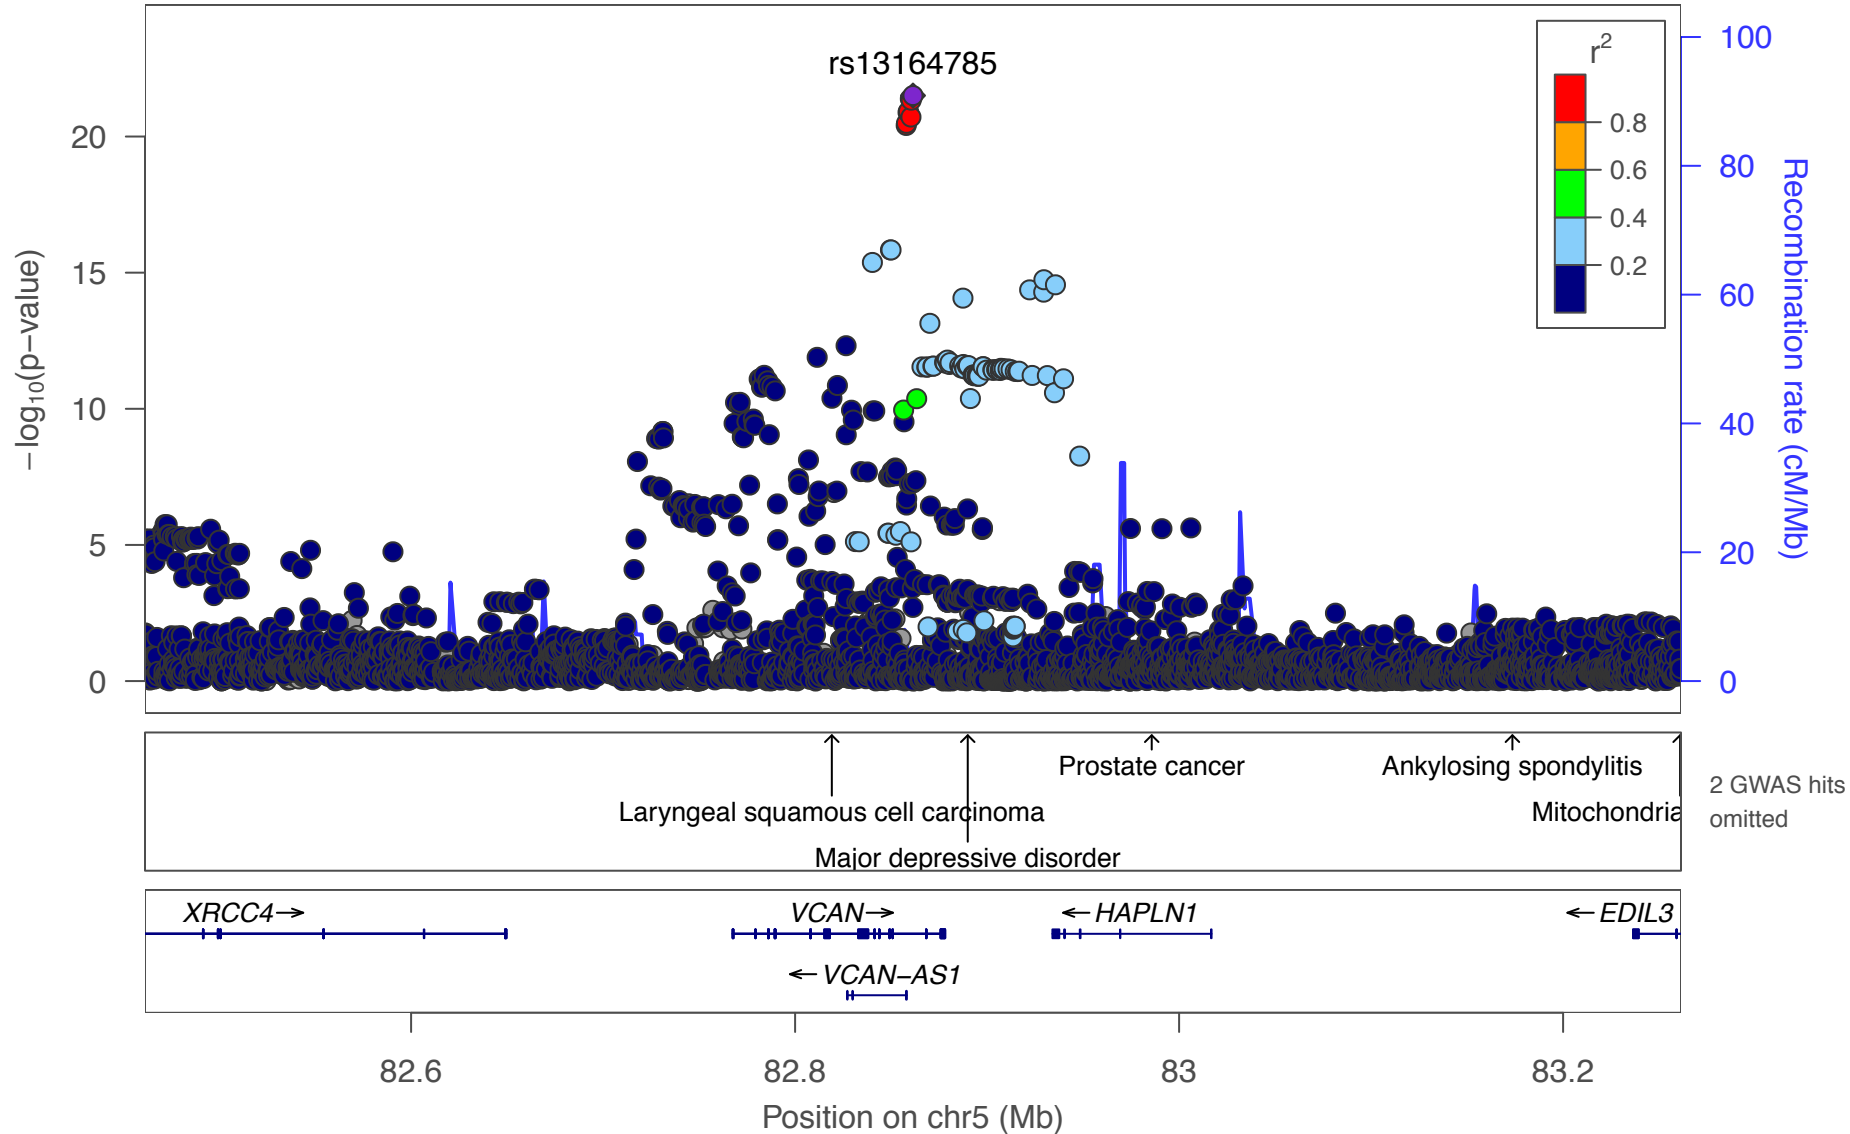

date: Thu Aug 17 17:58:12 2017

build: hg19

display range: chr5:82461400–83261400 [82461400–83261400]

hilite range: 0 – 0 [ 0 – 0 ]

reference SNP: chr5:82861400

number of SNPs plotted: 3396

min P.value: 3.13E–22 [chr5:82861400]

max P.value: 10E–1 [chr5:82962487]

omitted GWAS Hits: chr5:83.260938–Mitochondrial DNA levels, NA

## GWAS Catalog SNPs in Region

| <b>chr</b> | <b>pos (Mb)</b> | <b>trait</b>                      | <b>snp</b> |
|------------|-----------------|-----------------------------------|------------|
| 5          | 82.81912        | Laryngeal squamous cell carcinoma | rs310518   |
| 5          | 82.84549        | Diisocyanate-induced asthma       | rs3852186  |
| 5          | 82.88991        | Major depressive disorder         | rs310501   |
| 5          | 82.96073        | Visceral fat                      | rs3846635  |
| 5          | 82.98574        | Prostate cancer                   | rs4466137  |
| 5          | 83.17359        | Ankylosing spondylitis            | rs4552569  |
| 5          | 83.26094        | Mitochondrial DNA levels          | rs2301070  |

# ProbtrackX\_ICVF\_fmi

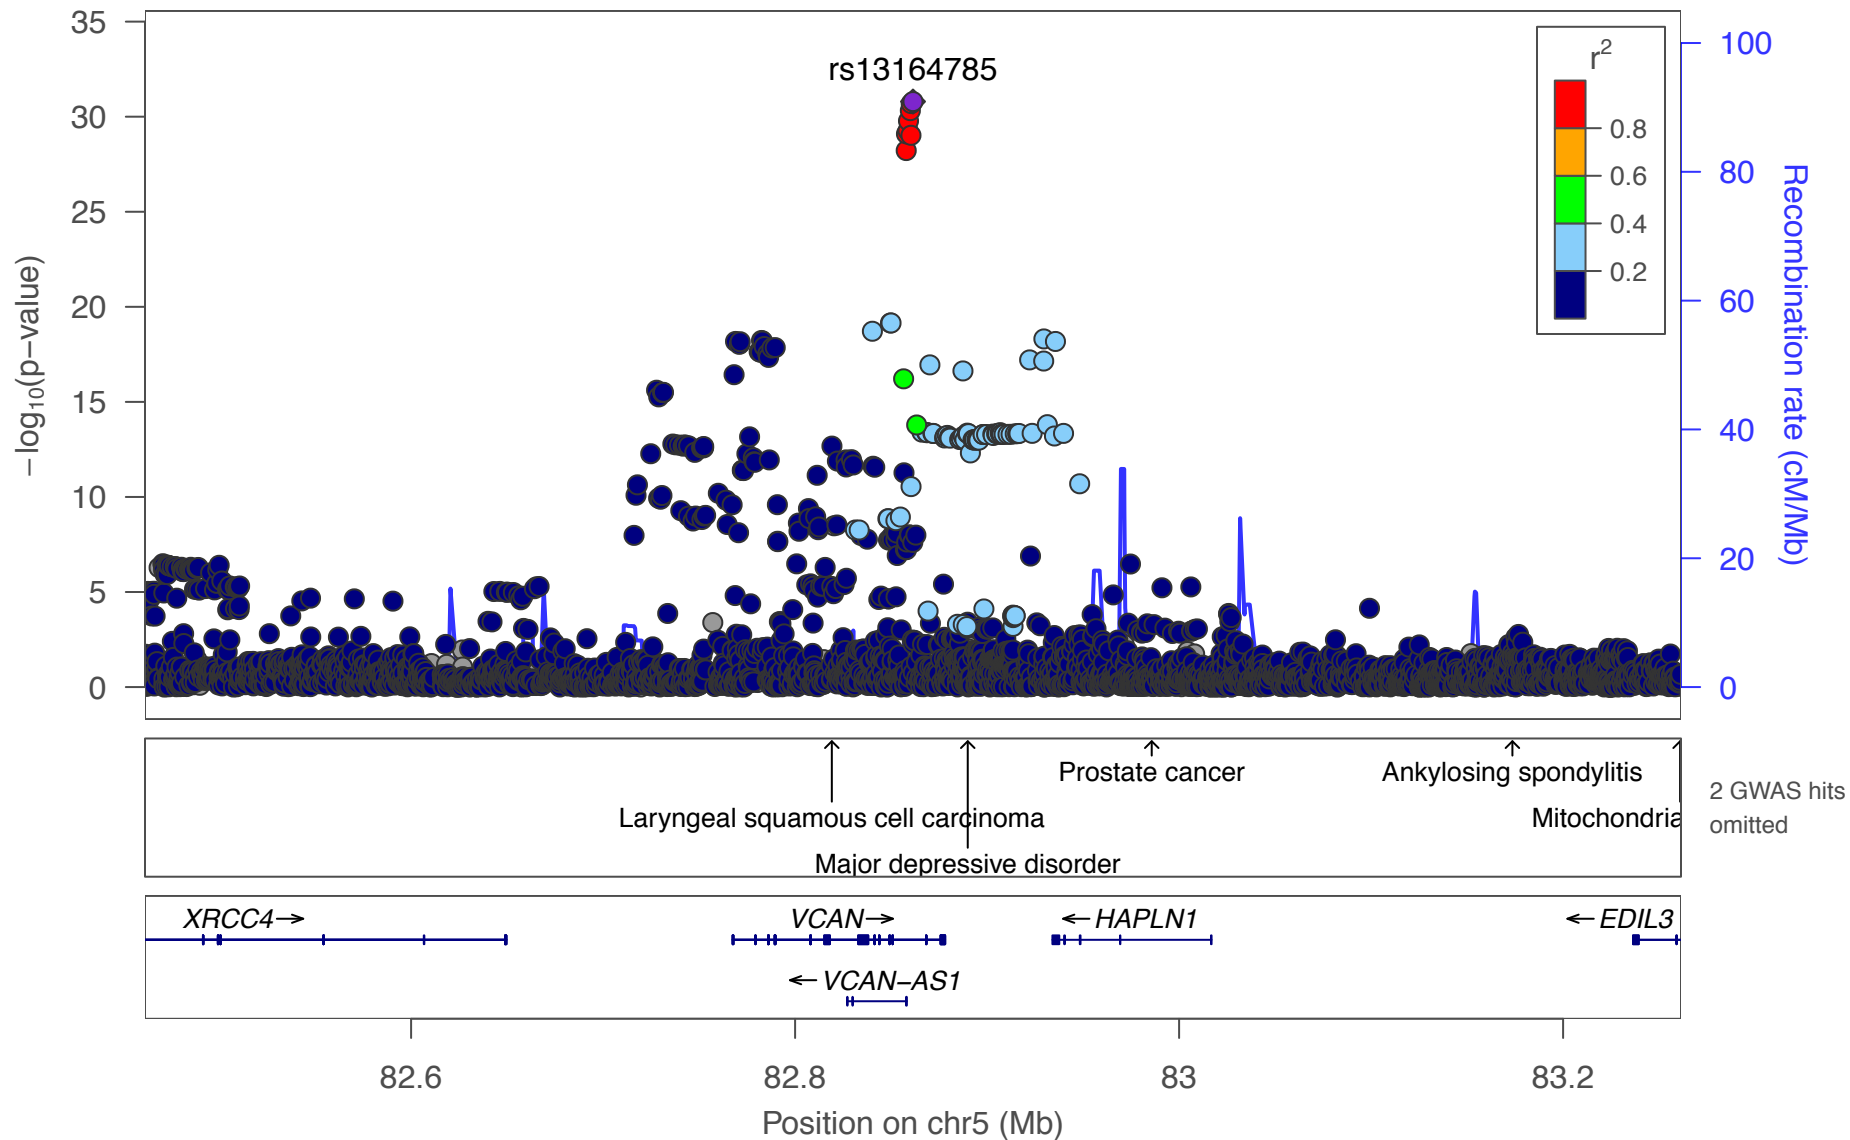

date: Thu Aug 17 17:58:12 2017

build: hg19

display range: chr5:82461400–83261400 [82461400–83261400]

hilite range: 0 – 0 [ 0 – 0 ]

reference SNP: chr5:82861400

number of SNPs plotted: 3396

min P.value: 1.6E–31 [chr5:82861400]

max P.value: 9.99E–1 [chr5:82847913]

omitted GWAS Hits: chr5:83.260938–Mitochondrial DNA levels, NA

## GWAS Catalog SNPs in Region

| <b>chr</b> | <b>pos (Mb)</b> | <b>trait</b>                      | <b>snp</b> |
|------------|-----------------|-----------------------------------|------------|
| 5          | 82.81912        | Laryngeal squamous cell carcinoma | rs310518   |
| 5          | 82.84549        | Diisocyanate-induced asthma       | rs3852186  |
| 5          | 82.88991        | Major depressive disorder         | rs310501   |
| 5          | 82.96073        | Visceral fat                      | rs3846635  |
| 5          | 82.98574        | Prostate cancer                   | rs4466137  |
| 5          | 83.17359        | Ankylosing spondylitis            | rs4552569  |
| 5          | 83.26094        | Mitochondrial DNA levels          | rs2301070  |

# ProbtrackX\_ICVF\_ifo\_I

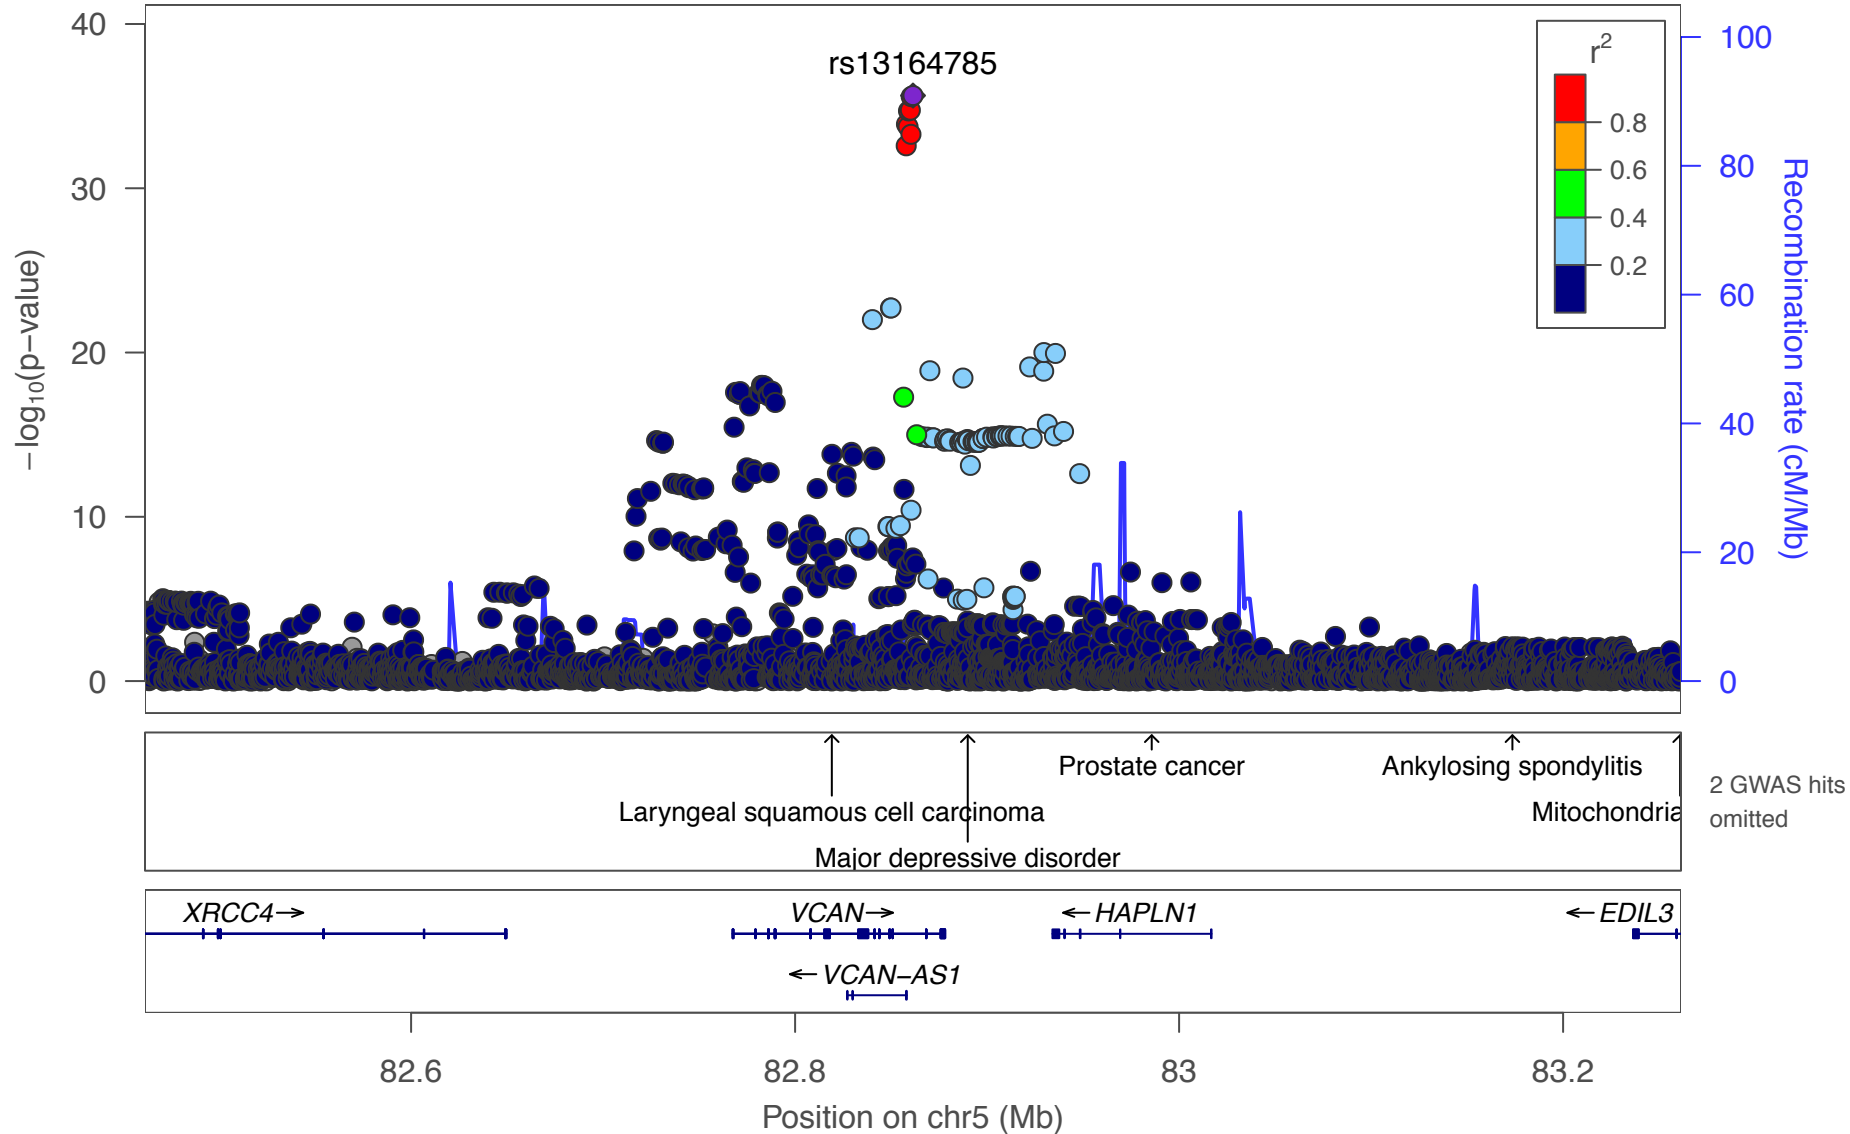

date: Thu Aug 17 17:58:12 2017

build: hg19

display range: chr5:82461400–83261400 [82461400–83261400]

hilite range: 0 – 0 [ 0 – 0 ]

reference SNP: chr5:82861400

number of SNPs plotted: 3396

min P.value: 2.27E–36 [chr5:82861400]

max P.value: 9.98E–1 [chr5:82691419]

omitted GWAS Hits: chr5:83.260938–Mitochondrial DNA levels, NA



## GWAS Catalog SNPs in Region

| <b>chr</b> | <b>pos (Mb)</b> | <b>trait</b>                      | <b>snp</b> |
|------------|-----------------|-----------------------------------|------------|
| 5          | 82.81912        | Laryngeal squamous cell carcinoma | rs310518   |
| 5          | 82.84549        | Diisocyanate-induced asthma       | rs3852186  |
| 5          | 82.88991        | Major depressive disorder         | rs310501   |
| 5          | 82.96073        | Visceral fat                      | rs3846635  |
| 5          | 82.98574        | Prostate cancer                   | rs4466137  |
| 5          | 83.17359        | Ankylosing spondylitis            | rs4552569  |
| 5          | 83.26094        | Mitochondrial DNA levels          | rs2301070  |

# ProbtrackX\_ICVF\_ifo\_r

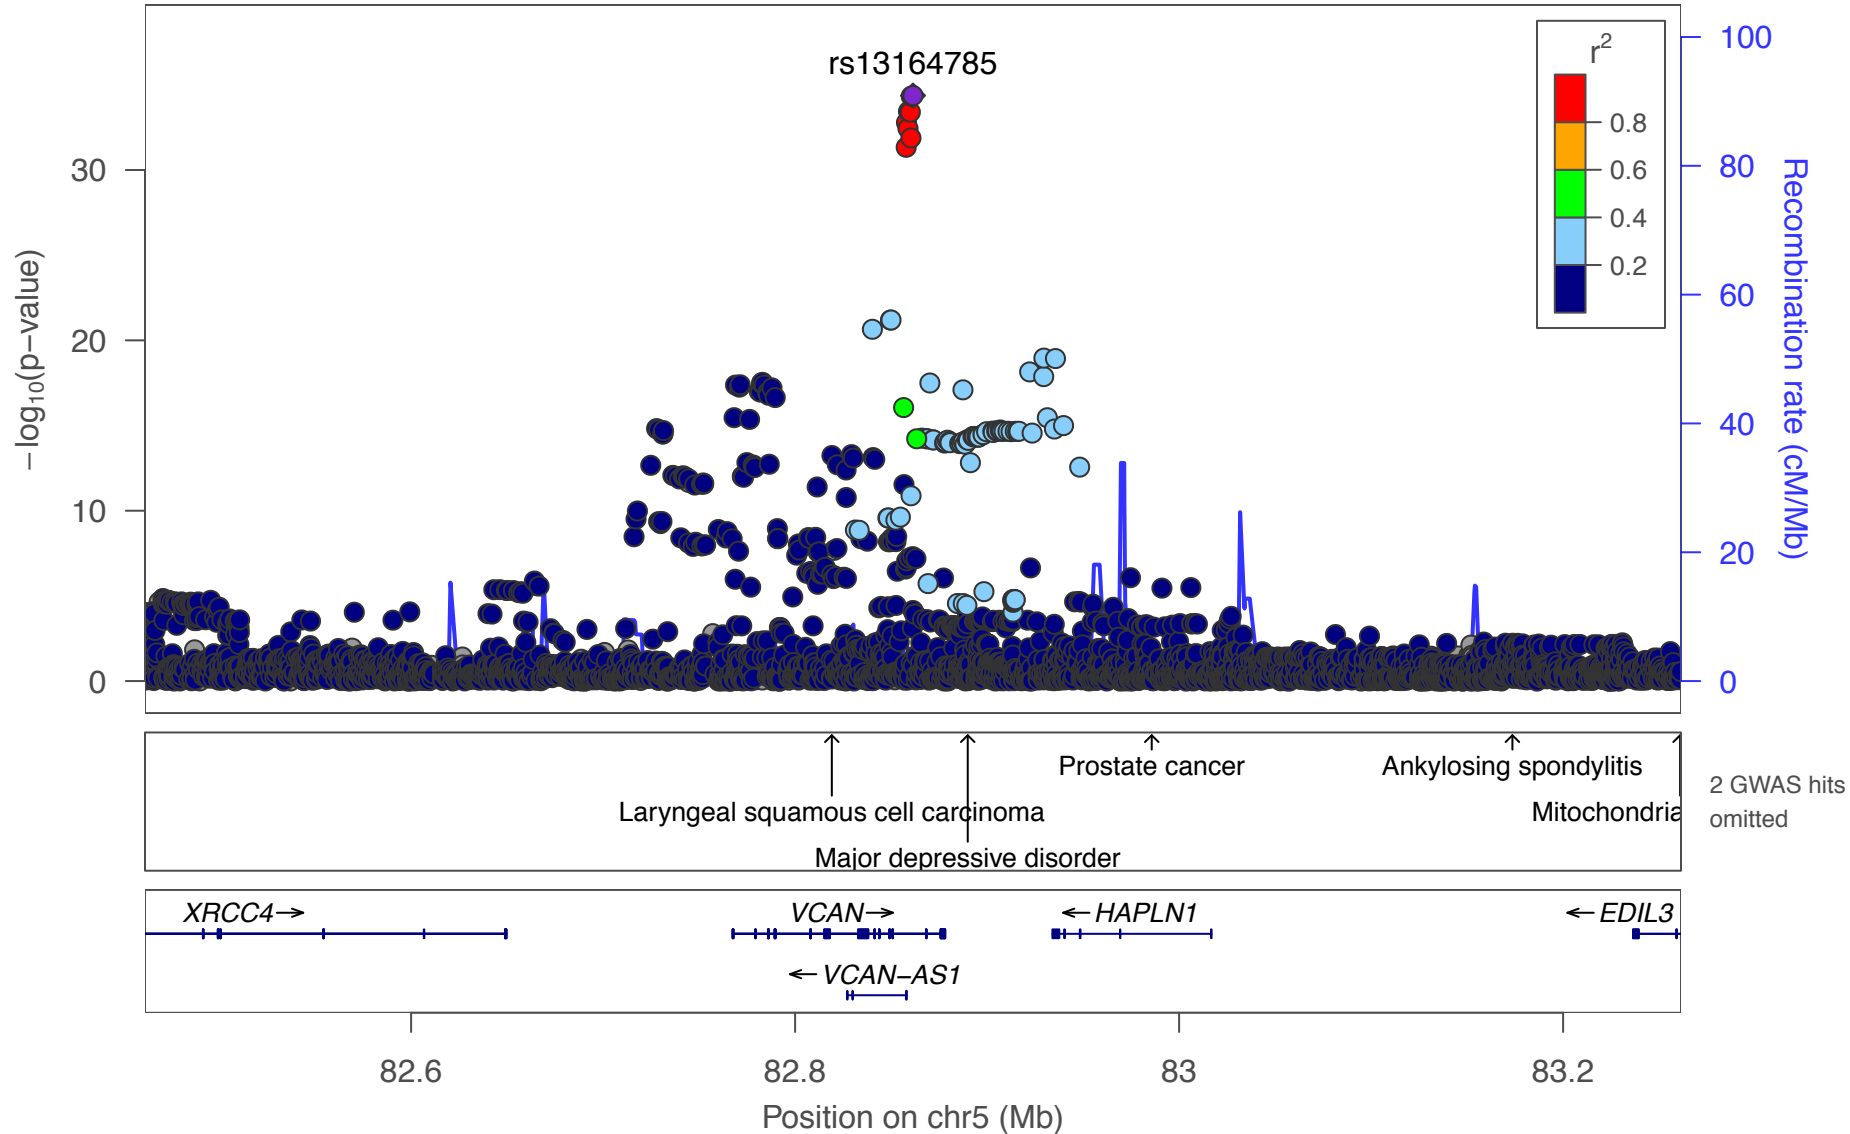

date: Thu Aug 17 17:58:12 2017

build: hg19

display range: chr5:82461400–83261400 [82461400–83261400]

hilite range: 0 – 0 [ 0 – 0 ]

reference SNP: chr5:82861400

number of SNPs plotted: 3396

min P.value: 4.28E–35 [chr5:82861400]

max P.value: 10E–1 [chr5:82653069]

omitted GWAS Hits: chr5:83.260938–Mitochondrial DNA levels, NA

## GWAS Catalog SNPs in Region

| <b>chr</b> | <b>pos (Mb)</b> | <b>trait</b>                      | <b>snp</b> |
|------------|-----------------|-----------------------------------|------------|
| 5          | 82.81912        | Laryngeal squamous cell carcinoma | rs310518   |
| 5          | 82.84549        | Diisocyanate-induced asthma       | rs3852186  |
| 5          | 82.88991        | Major depressive disorder         | rs310501   |
| 5          | 82.96073        | Visceral fat                      | rs3846635  |
| 5          | 82.98574        | Prostate cancer                   | rs4466137  |
| 5          | 83.17359        | Ankylosing spondylitis            | rs4552569  |
| 5          | 83.26094        | Mitochondrial DNA levels          | rs2301070  |

# ProbtrackX\_ICVF\_ilf\_I

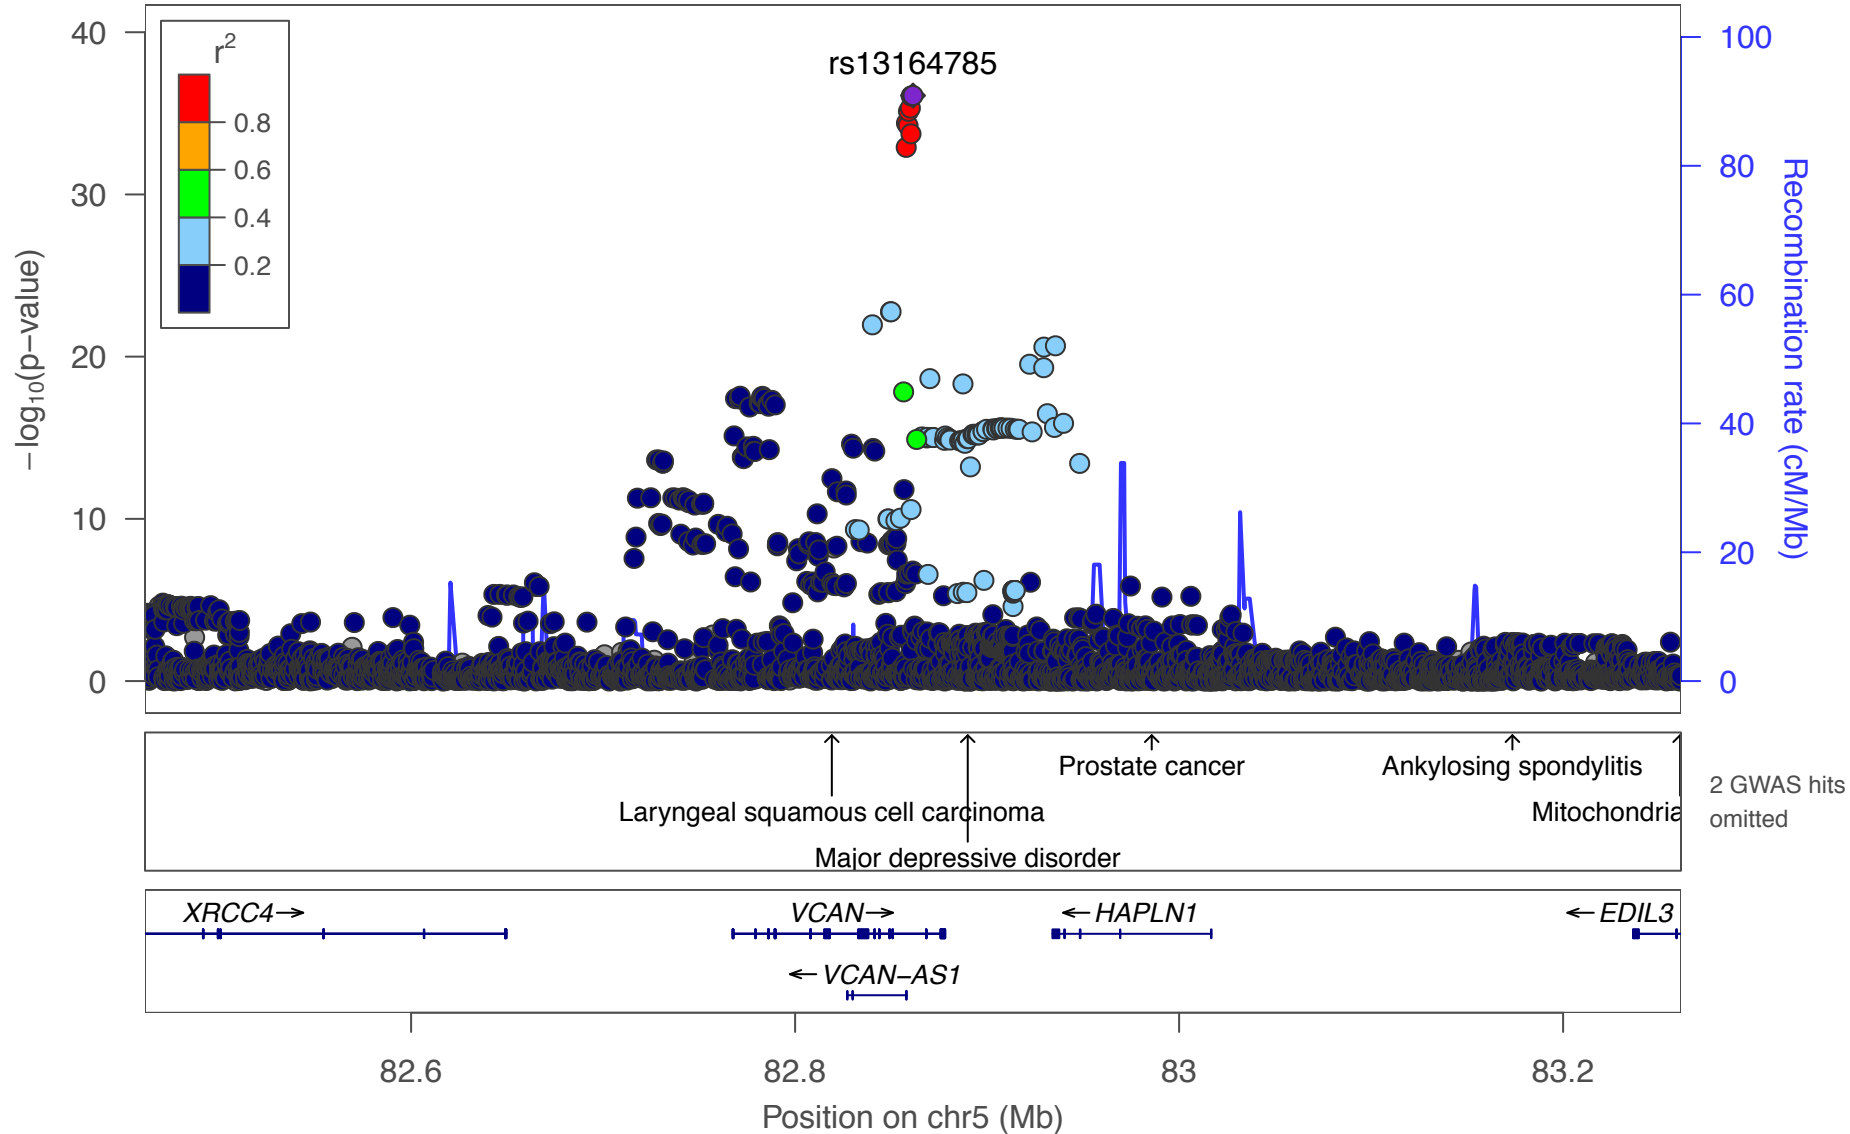

date: Thu Aug 17 17:58:12 2017

build: hg19

display range: chr5:82461400–83261400 [82461400–83261400]

hilite range: 0 – 0 [ 0 – 0 ]

reference SNP: chr5:82861400

number of SNPs plotted: 3396

min P.value: 8.02E–37 [chr5:82861400]

max P.value: 10E–1 [chr5:83163554]

omitted GWAS Hits: chr5:83.260938–Mitochondrial DNA levels, NA

## GWAS Catalog SNPs in Region

| <b>chr</b> | <b>pos (Mb)</b> | <b>trait</b>                      | <b>snp</b> |
|------------|-----------------|-----------------------------------|------------|
| 5          | 82.81912        | Laryngeal squamous cell carcinoma | rs310518   |
| 5          | 82.84549        | Diisocyanate-induced asthma       | rs3852186  |
| 5          | 82.88991        | Major depressive disorder         | rs310501   |
| 5          | 82.96073        | Visceral fat                      | rs3846635  |
| 5          | 82.98574        | Prostate cancer                   | rs4466137  |
| 5          | 83.17359        | Ankylosing spondylitis            | rs4552569  |
| 5          | 83.26094        | Mitochondrial DNA levels          | rs2301070  |

# ProbtrackX\_ICVF\_ml\_r

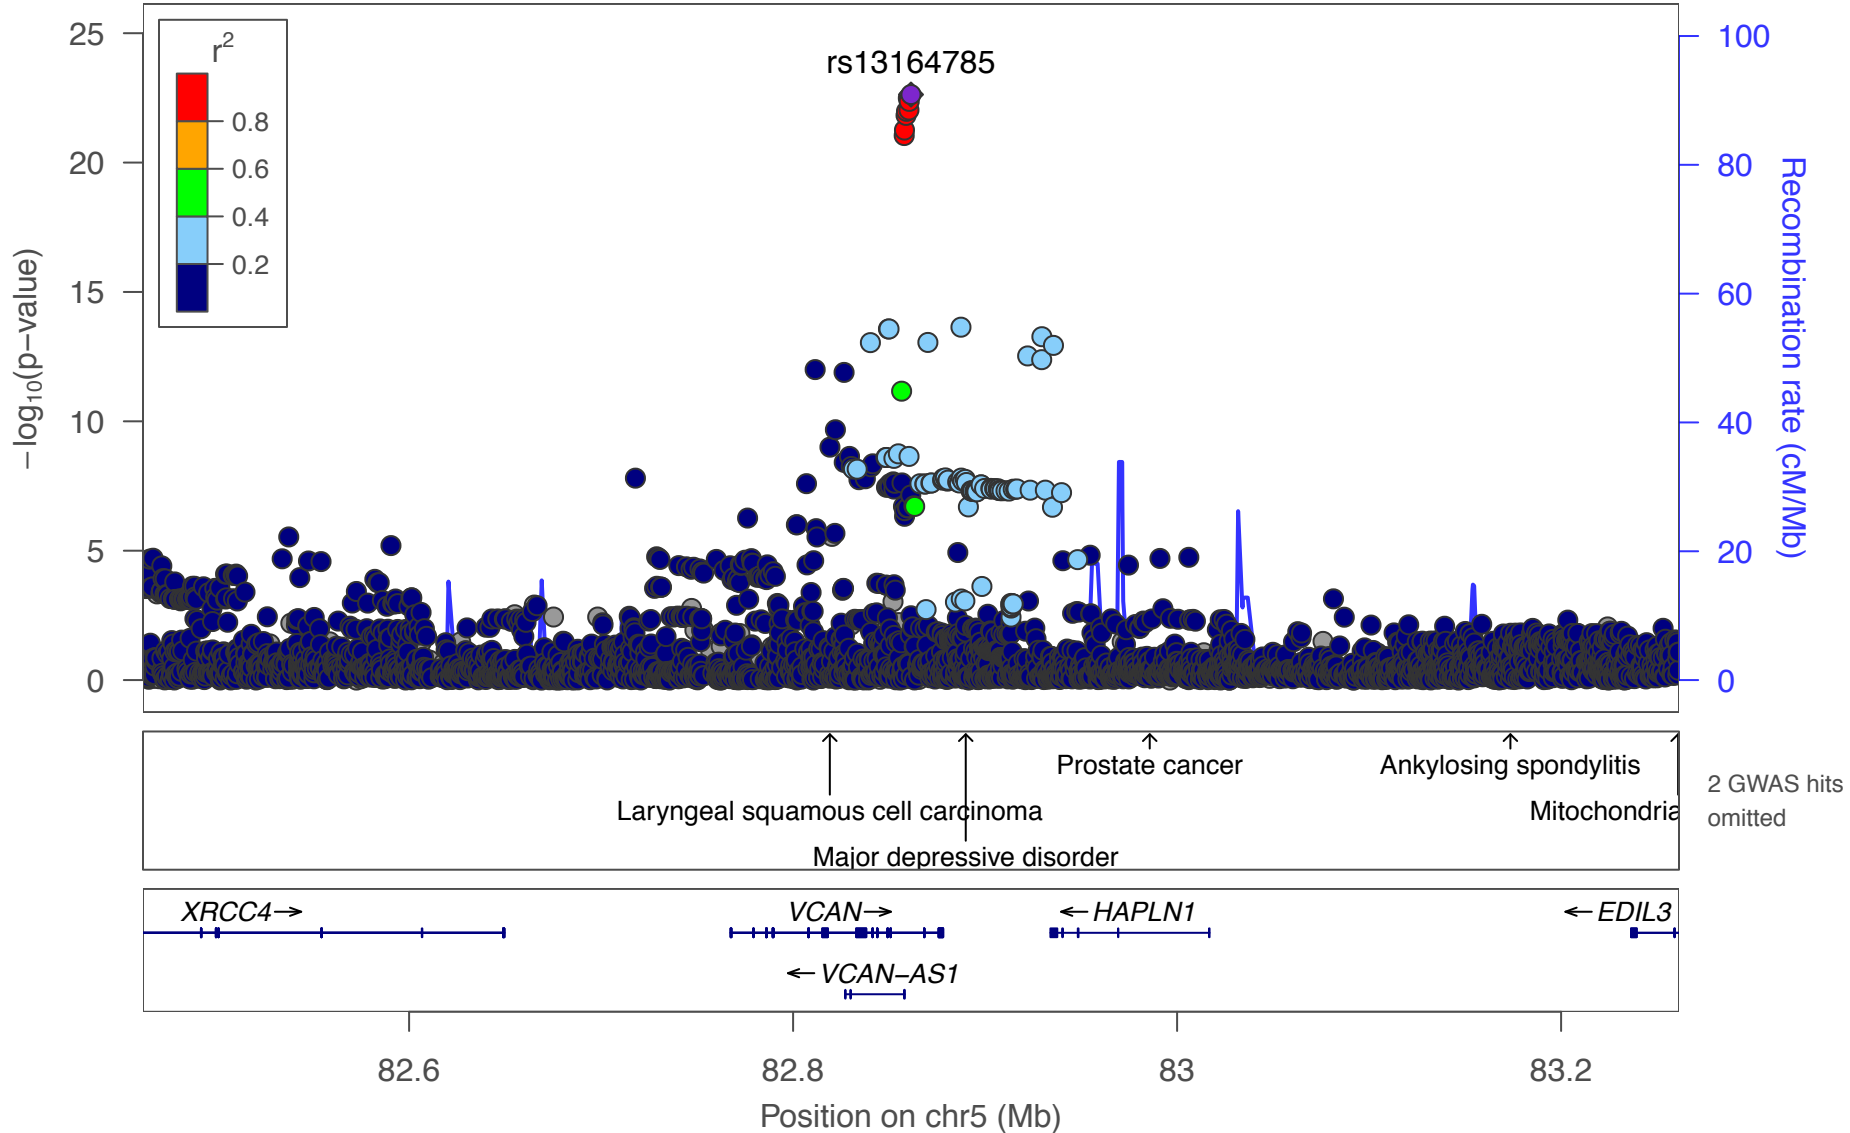



date: Thu Aug 17 17:58:12 2017

build: hg19

display range: chr5:82461400–83261400 [82461400–83261400]

hilite range: 0 – 0 [ 0 – 0 ]

reference SNP: chr5:82861400

number of SNPs plotted: 3396

min P.value: 2.35E–23 [chr5:82861400]

max P.value: 10E–1 [chr5:82832449]

omitted GWAS Hits: chr5:83.260938–Mitochondrial DNA levels, NA

## GWAS Catalog SNPs in Region

| <b>chr</b> | <b>pos (Mb)</b> | <b>trait</b>                      | <b>snp</b> |
|------------|-----------------|-----------------------------------|------------|
| 5          | 82.81912        | Laryngeal squamous cell carcinoma | rs310518   |
| 5          | 82.84549        | Diisocyanate-induced asthma       | rs3852186  |
| 5          | 82.88991        | Major depressive disorder         | rs310501   |
| 5          | 82.96073        | Visceral fat                      | rs3846635  |
| 5          | 82.98574        | Prostate cancer                   | rs4466137  |
| 5          | 83.17359        | Ankylosing spondylitis            | rs4552569  |
| 5          | 83.26094        | Mitochondrial DNA levels          | rs2301070  |

# ProbtrackX\_ICVF\_slf\_I

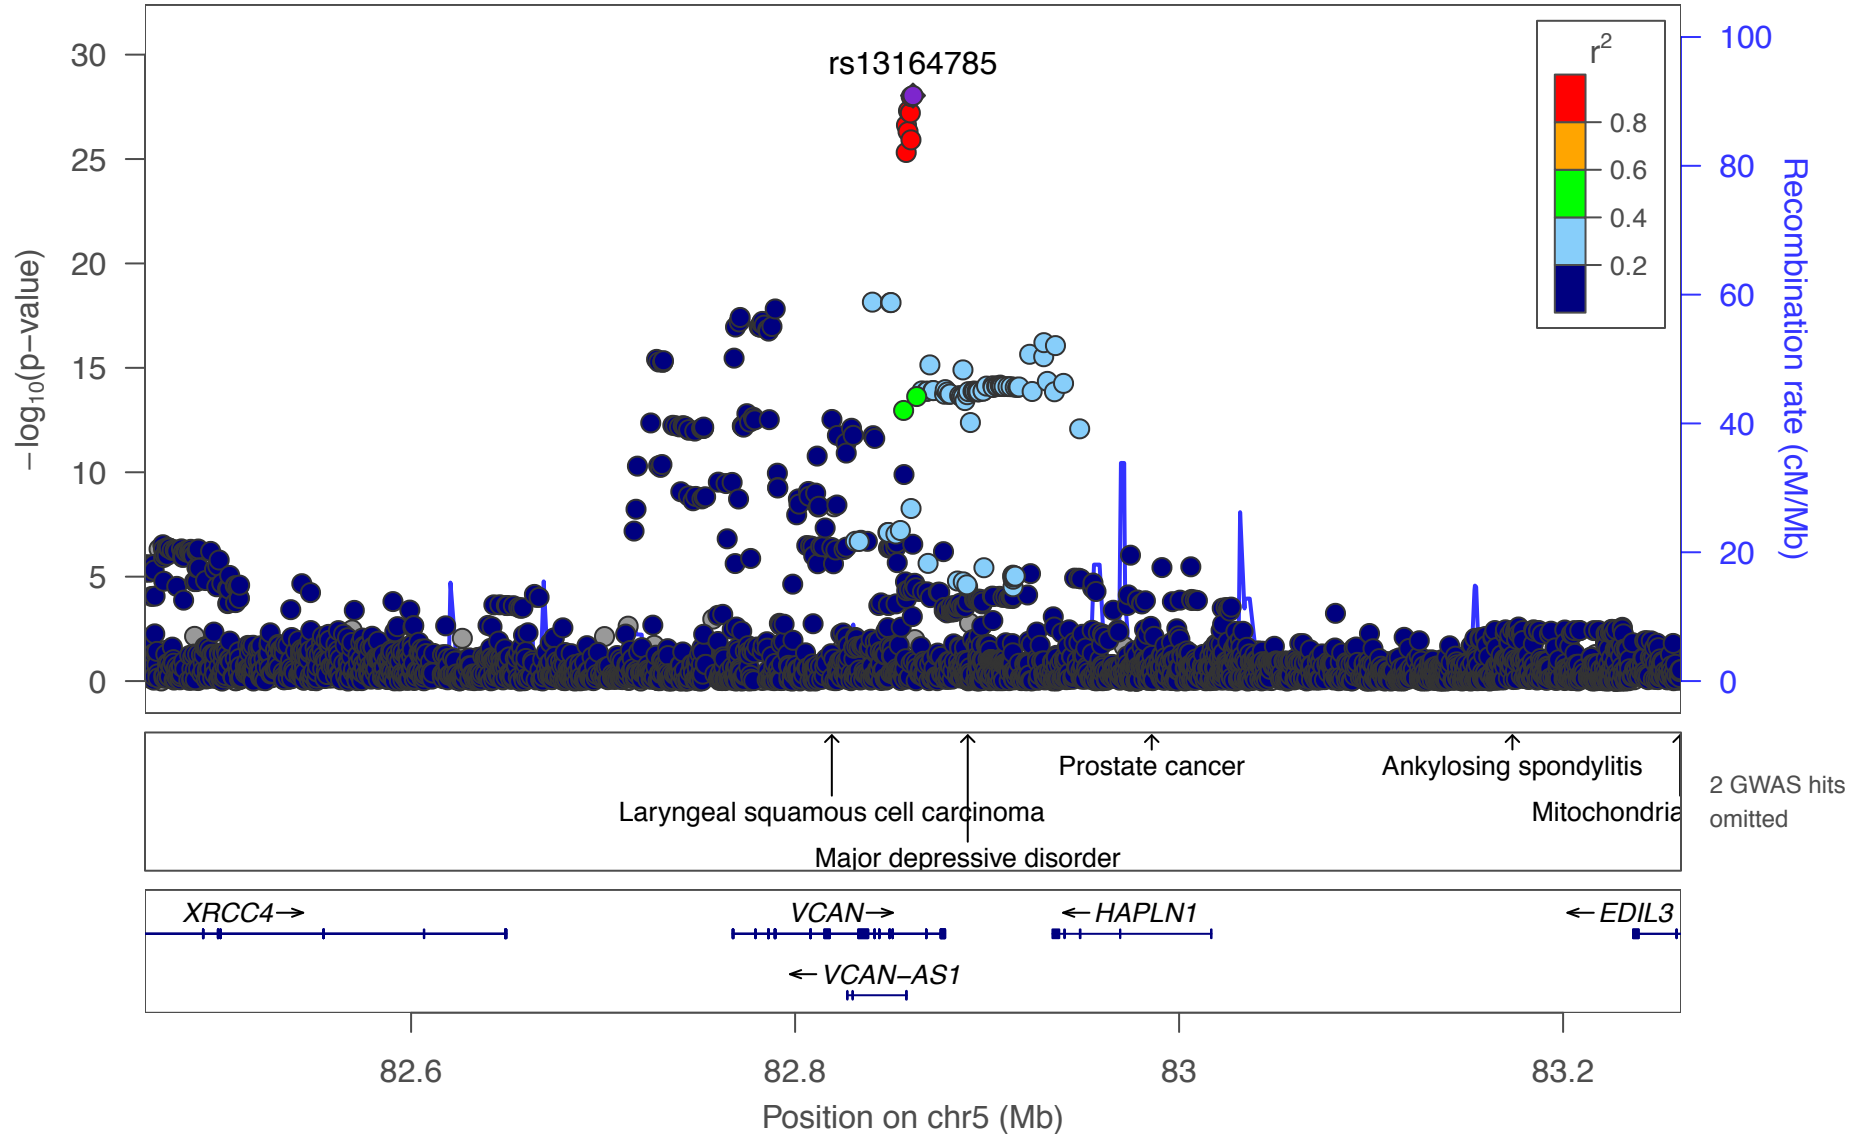

date: Thu Aug 17 18:10:31 2017

build: hg19

display range: chr5:82461400–83261400 [82461400–83261400]

hilite range: 0 – 0 [ 0 – 0 ]

reference SNP: chr5:82861400

number of SNPs plotted: 3396

min P.value: 9.12E–29 [chr5:82861400]

max P.value: 9.99E–1 [chr5:83228903]

omitted GWAS Hits: chr5:83.260938–Mitochondrial DNA levels, NA

## GWAS Catalog SNPs in Region

| <b>chr</b> | <b>pos (Mb)</b> | <b>trait</b>                      | <b>snp</b> |
|------------|-----------------|-----------------------------------|------------|
| 5          | 82.81912        | Laryngeal squamous cell carcinoma | rs310518   |
| 5          | 82.84549        | Diisocyanate-induced asthma       | rs3852186  |
| 5          | 82.88991        | Major depressive disorder         | rs310501   |
| 5          | 82.96073        | Visceral fat                      | rs3846635  |
| 5          | 82.98574        | Prostate cancer                   | rs4466137  |
| 5          | 83.17359        | Ankylosing spondylitis            | rs4552569  |
| 5          | 83.26094        | Mitochondrial DNA levels          | rs2301070  |

# ProbtrackX\_ICVF\_str\_I

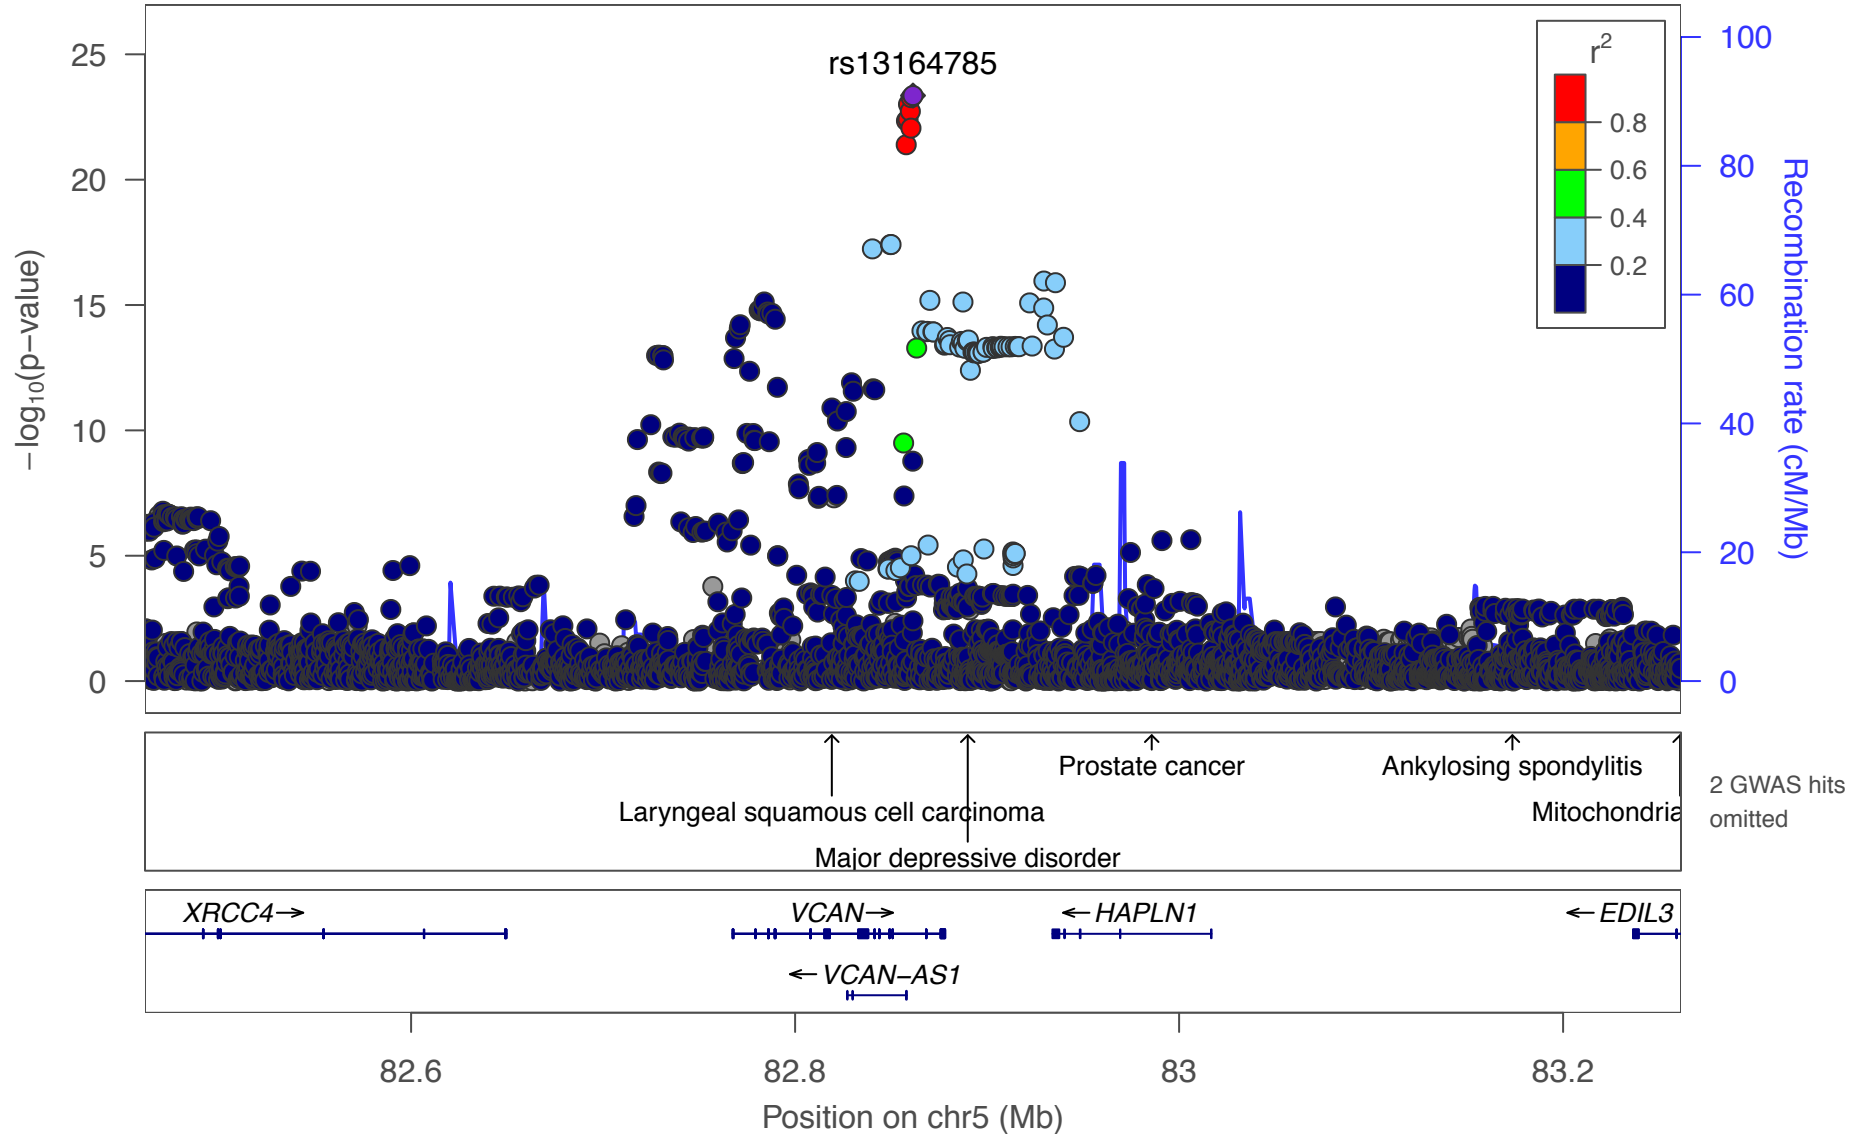

date: Thu Aug 17 18:23:30 2017

build: hg19

display range: chr5:82461400–83261400 [82461400–83261400]

hilite range: 0 – 0 [ 0 – 0 ]

reference SNP: chr5:82861400

number of SNPs plotted: 3396

min P.value: 4.42E–24 [chr5:82861400]

max P.value: 10E–1 [chr5:82592509]

omitted GWAS Hits: chr5:83.260938–Mitochondrial DNA levels, NA

## GWAS Catalog SNPs in Region

| <b>chr</b> | <b>pos (Mb)</b> | <b>trait</b>                      | <b>snp</b> |
|------------|-----------------|-----------------------------------|------------|
| 5          | 82.81912        | Laryngeal squamous cell carcinoma | rs310518   |
| 5          | 82.84549        | Diisocyanate-induced asthma       | rs3852186  |
| 5          | 82.88991        | Major depressive disorder         | rs310501   |
| 5          | 82.96073        | Visceral fat                      | rs3846635  |
| 5          | 82.98574        | Prostate cancer                   | rs4466137  |
| 5          | 83.17359        | Ankylosing spondylitis            | rs4552569  |
| 5          | 83.26094        | Mitochondrial DNA levels          | rs2301070  |



# ProbtrackX\_ICVF\_str\_r

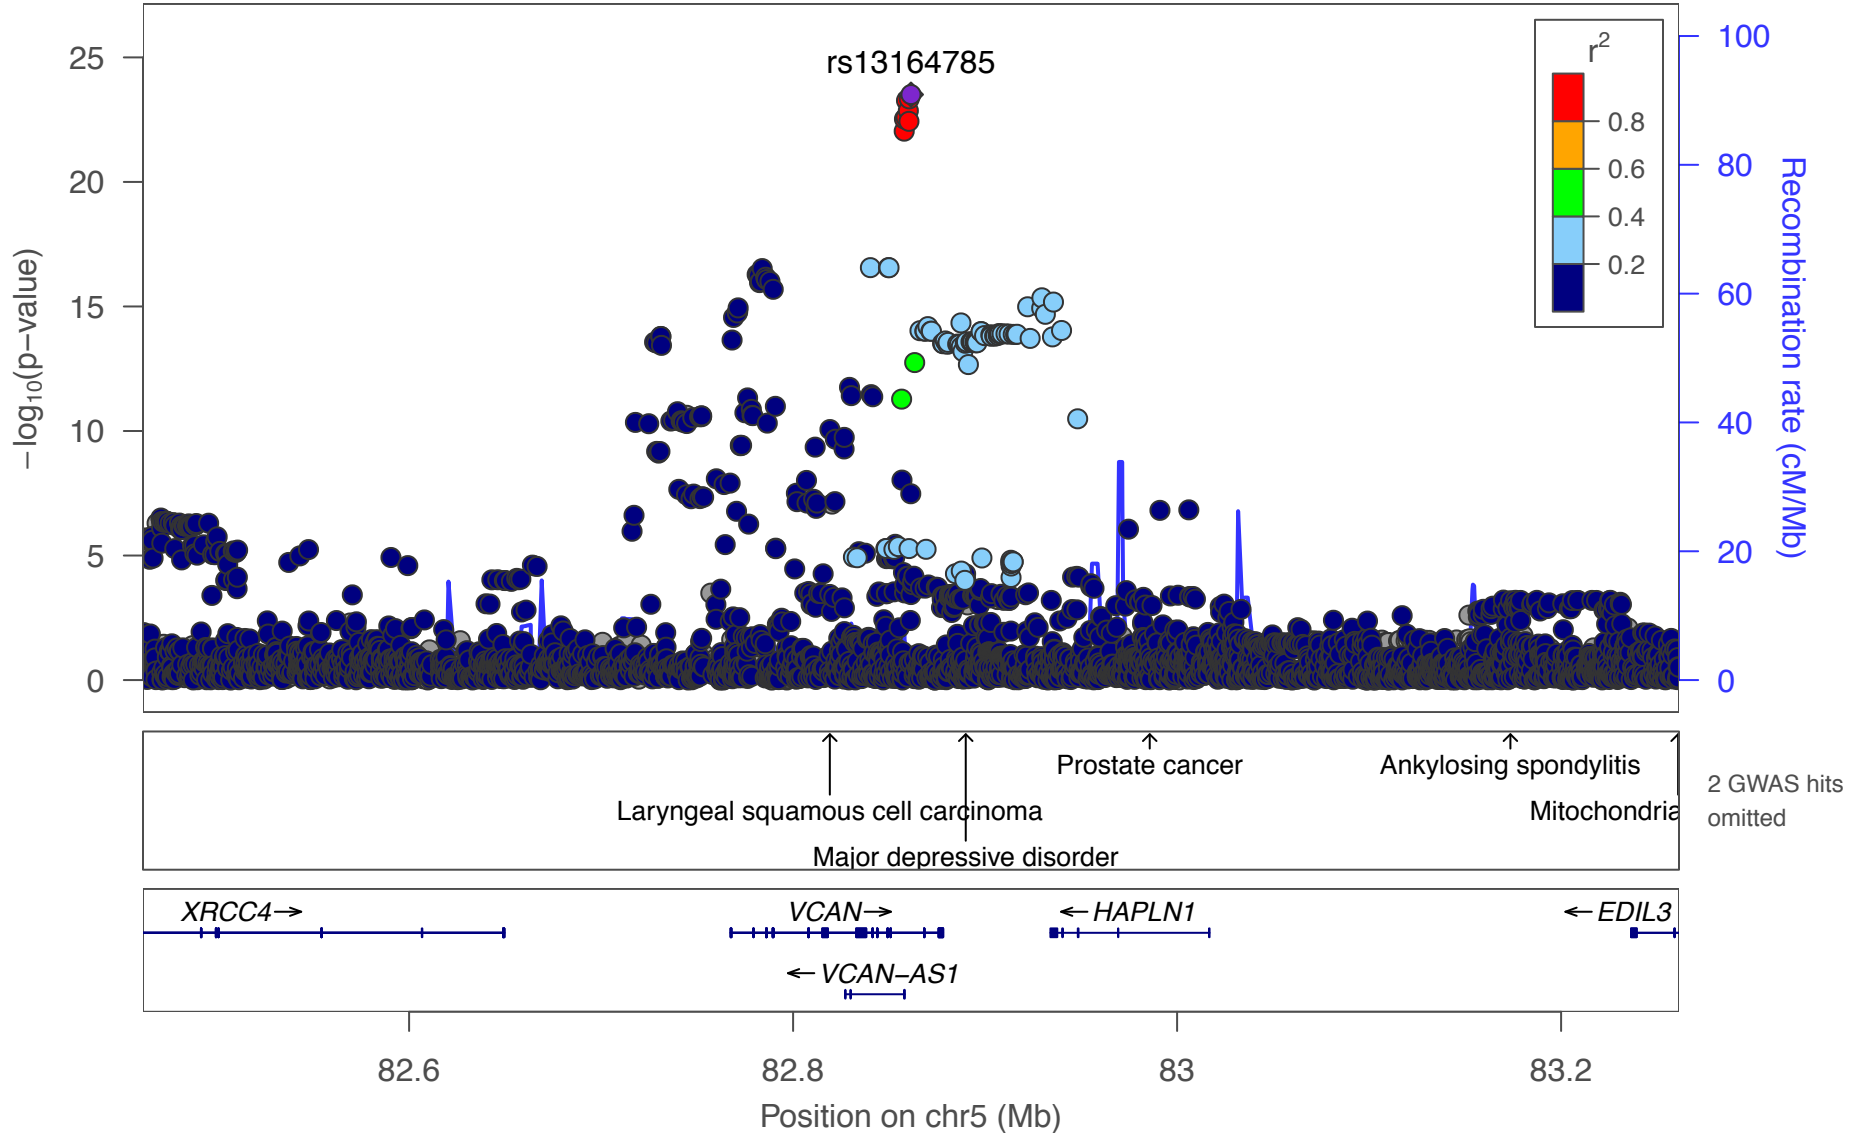

date: Thu Aug 17 18:23:30 2017

build: hg19

display range: chr5:82461400–83261400 [82461400–83261400]

hilite range: 0 – 0 [ 0 – 0 ]

reference SNP: chr5:82861400

number of SNPs plotted: 3396

min P.value: 3.1E–24 [chr5:82861400]

max P.value: 9.98E–1 [chr5:83098673]

omitted GWAS Hits: chr5:83.260938–Mitochondrial DNA levels, NA

## GWAS Catalog SNPs in Region

| <b>chr</b> | <b>pos (Mb)</b> | <b>trait</b>                      | <b>snp</b> |
|------------|-----------------|-----------------------------------|------------|
| 5          | 82.81912        | Laryngeal squamous cell carcinoma | rs310518   |
| 5          | 82.84549        | Diisocyanate-induced asthma       | rs3852186  |
| 5          | 82.88991        | Major depressive disorder         | rs310501   |
| 5          | 82.96073        | Visceral fat                      | rs3846635  |
| 5          | 82.98574        | Prostate cancer                   | rs4466137  |
| 5          | 83.17359        | Ankylosing spondylitis            | rs4552569  |
| 5          | 83.26094        | Mitochondrial DNA levels          | rs2301070  |

# ProbtrackX\_ICVF\_unc\_I

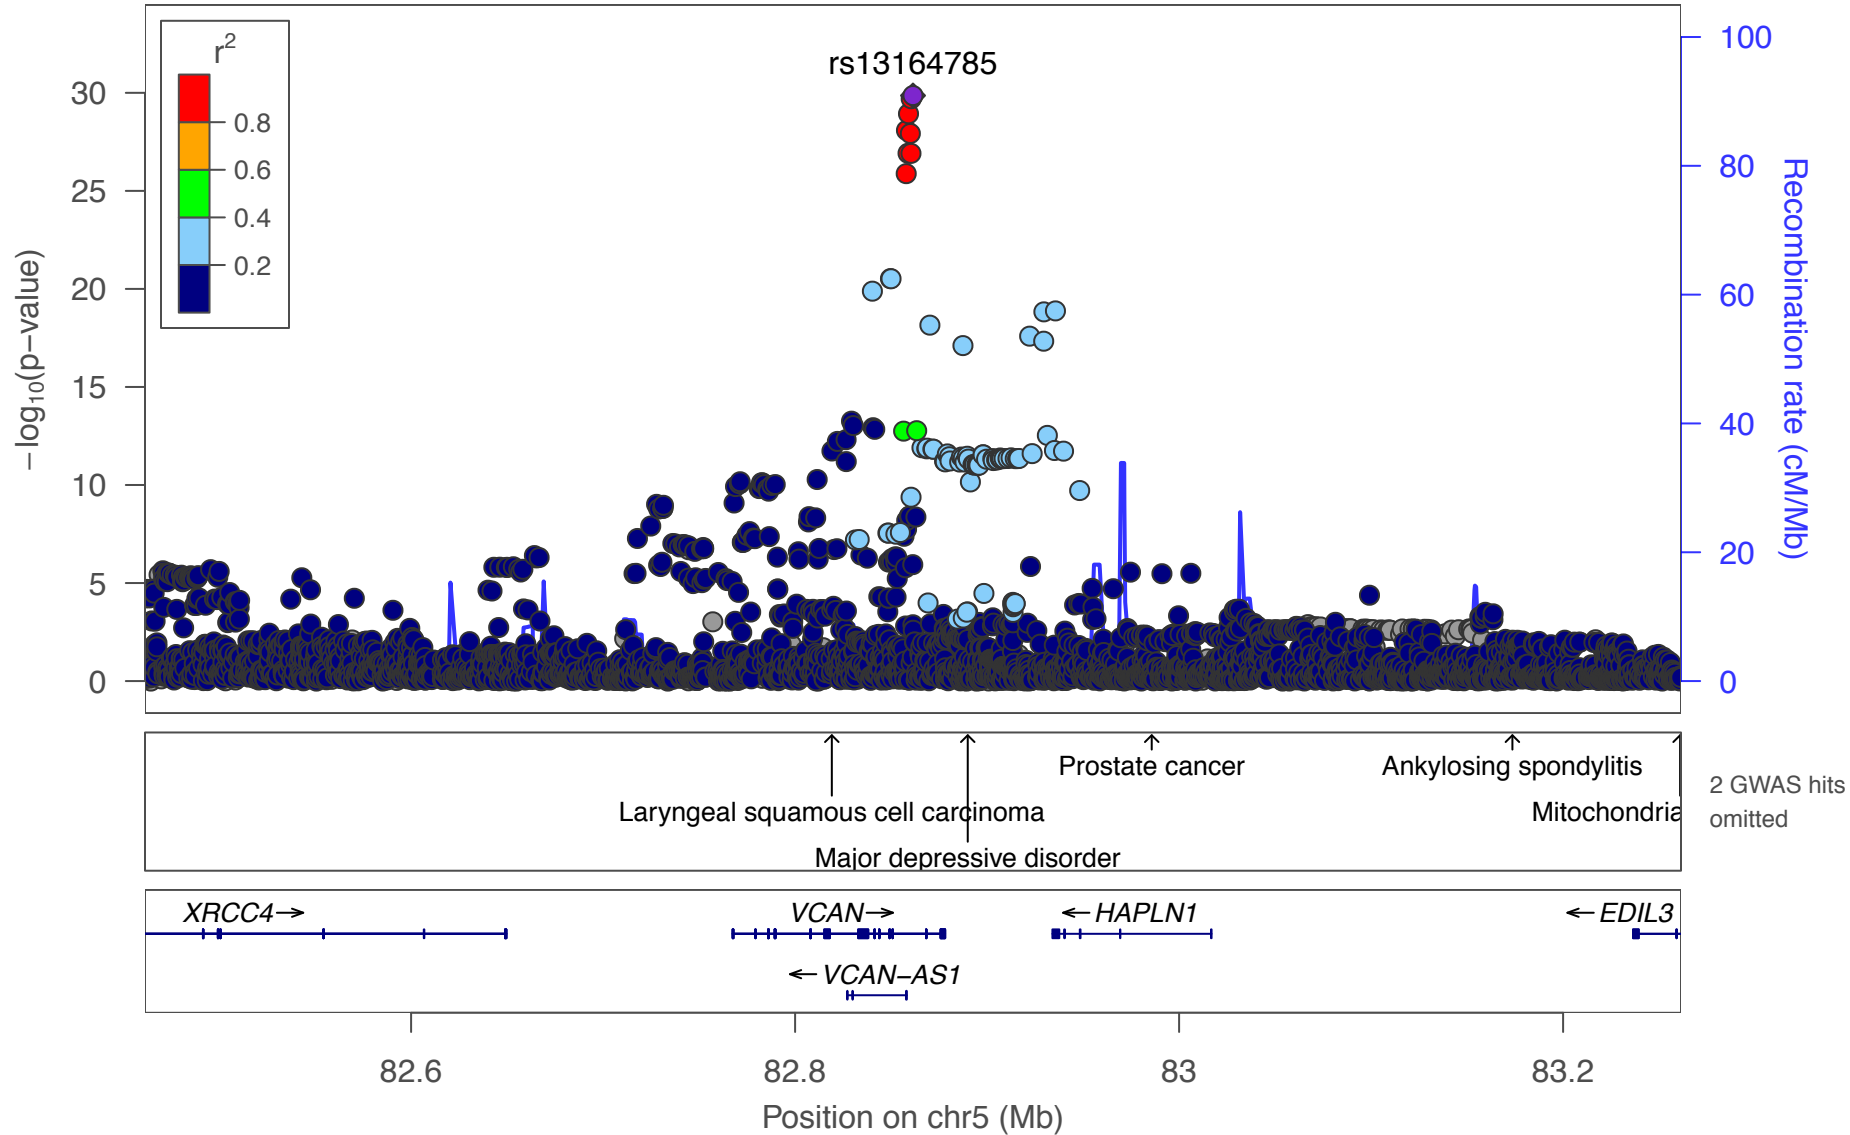

date: Thu Aug 17 18:23:31 2017

build: hg19

display range: chr5:82461400–83261400 [82461400–83261400]

hilite range: 0 – 0 [ 0 – 0 ]

reference SNP: chr5:82861400

number of SNPs plotted: 3396

min P.value: 1.38E–30 [chr5:82861400]

max P.value: 9.99E–1 [chr5:82811969]

omitted GWAS Hits: chr5:83.260938–Mitochondrial DNA levels, NA

## GWAS Catalog SNPs in Region

| <b>chr</b> | <b>pos (Mb)</b> | <b>trait</b>                      | <b>snp</b> |
|------------|-----------------|-----------------------------------|------------|
| 5          | 82.81912        | Laryngeal squamous cell carcinoma | rs310518   |
| 5          | 82.84549        | Diisocyanate-induced asthma       | rs3852186  |
| 5          | 82.88991        | Major depressive disorder         | rs310501   |
| 5          | 82.96073        | Visceral fat                      | rs3846635  |
| 5          | 82.98574        | Prostate cancer                   | rs4466137  |
| 5          | 83.17359        | Ankylosing spondylitis            | rs4552569  |
| 5          | 83.26094        | Mitochondrial DNA levels          | rs2301070  |

# ProbtrackX\_ICVF\_unc\_r

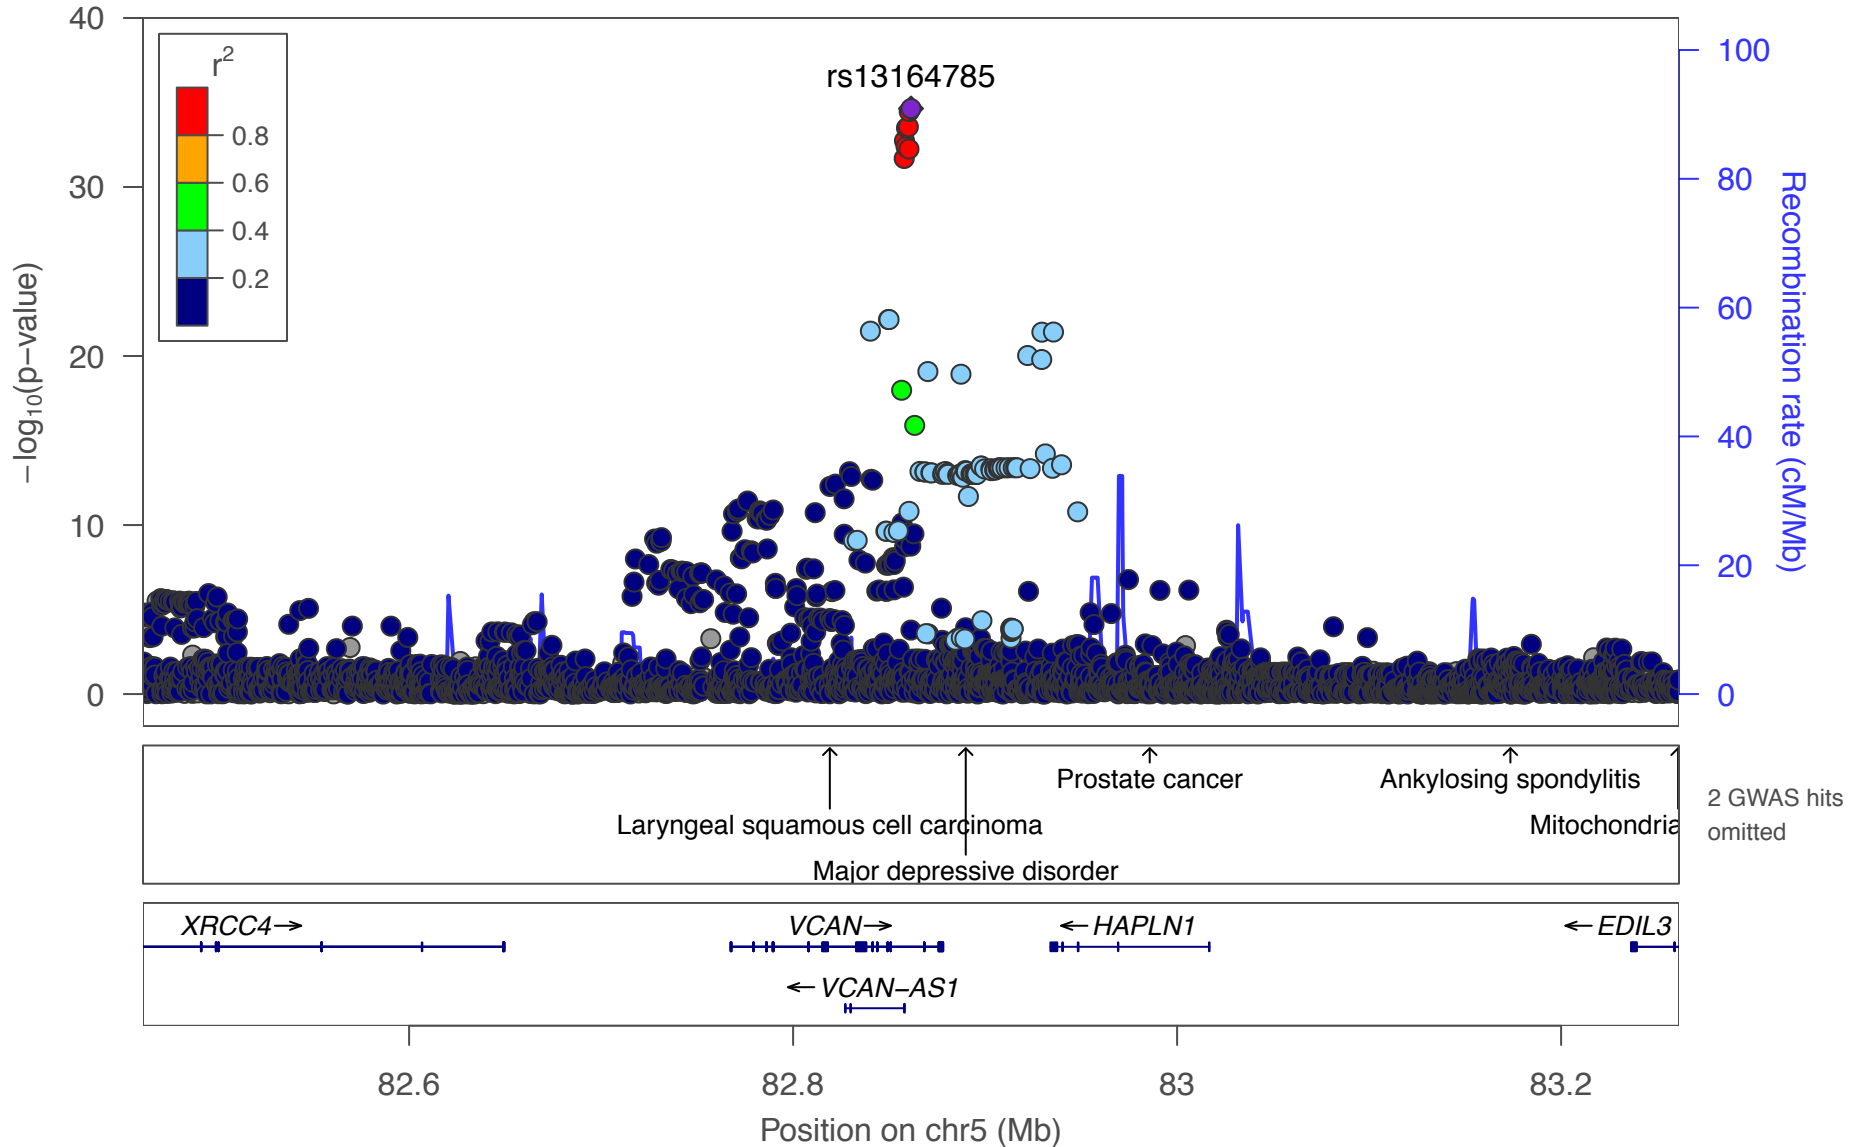

date: Thu Aug 17 18:01:49 2017

build: hg19

display range: chr5:82461400–83261400 [82461400–83261400]

hilite range: 0 – 0 [ 0 – 0 ]

reference SNP: chr5:82861400

number of SNPs plotted: 3396

min P.value: 2.29E–35 [chr5:82861400]

max P.value: 9.97E–1 [chr5:83021163]

omitted GWAS Hits: chr5:83.260938–Mitochondrial DNA levels, NA



## GWAS Catalog SNPs in Region

| <b>chr</b> | <b>pos (Mb)</b> | <b>trait</b>                      | <b>snp</b> |
|------------|-----------------|-----------------------------------|------------|
| 5          | 82.81912        | Laryngeal squamous cell carcinoma | rs310518   |
| 5          | 82.84549        | Diisocyanate-induced asthma       | rs3852186  |
| 5          | 82.88991        | Major depressive disorder         | rs310501   |
| 5          | 82.96073        | Visceral fat                      | rs3846635  |
| 5          | 82.98574        | Prostate cancer                   | rs4466137  |
| 5          | 83.17359        | Ankylosing spondylitis            | rs4552569  |
| 5          | 83.26094        | Mitochondrial DNA levels          | rs2301070  |

# netmat\_edge\_ICA\_004

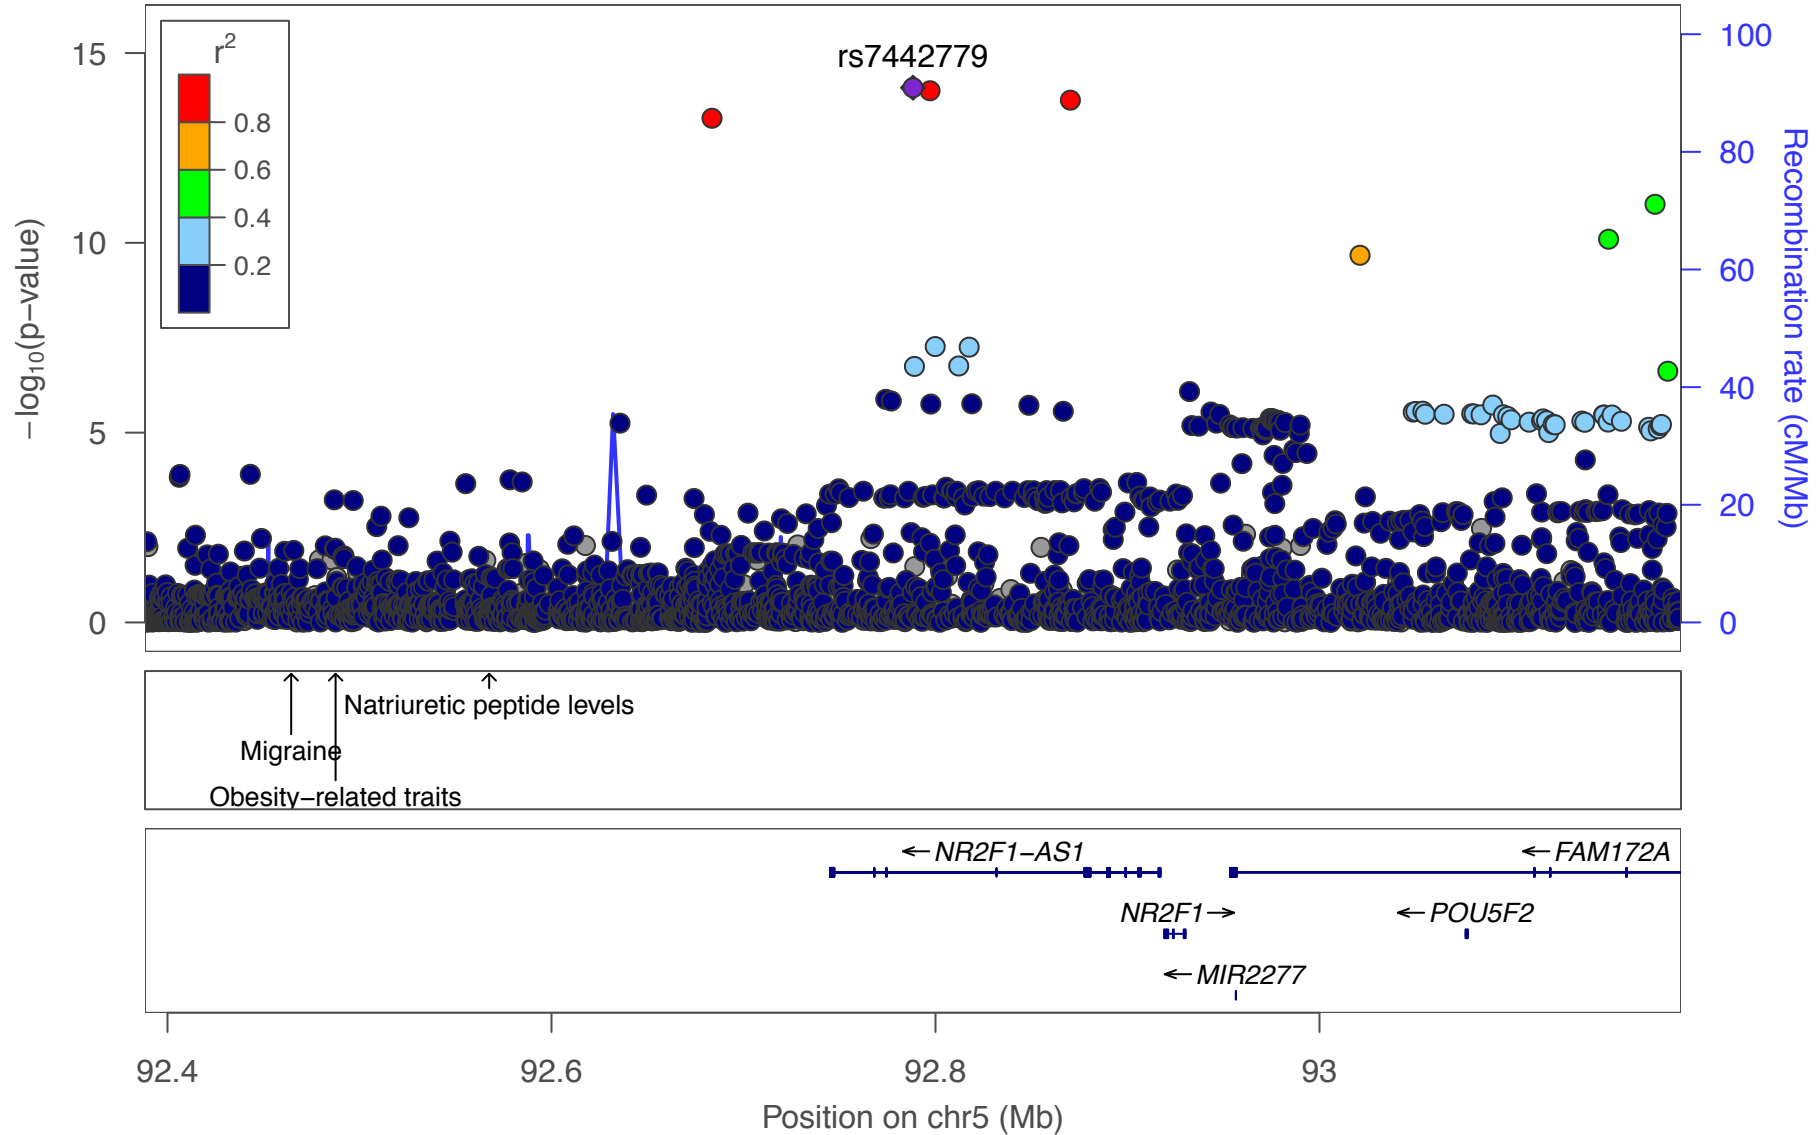

date: Sat Aug 19 17:26:53 2017

build: hg19

display range: chr5:92388278–93188278 [92388278–93188278]

hilite range: 0 – 0 [ 0 – 0 ]

reference SNP: chr5:92788278

number of SNPs plotted: 2480

min P.value: 8.18E–15 [chr5:92788278]

max P.value: 10E–1 [chr5:93160560]

## GWAS Catalog SNPs in Region

| <b>chr</b> | <b>pos (Mb)</b> | <b>trait</b>               | <b>snp</b> |
|------------|-----------------|----------------------------|------------|
| 5          | 92.46442        | Migraine                   | rs12519773 |
| 5          | 92.48754        | Obesity-related traits     | rs13173682 |
| 5          | 92.56754        | Natriuretic peptide levels | rs4869419  |

# TBSS\_FA\_Splenium\_of\_corpus\_callosum

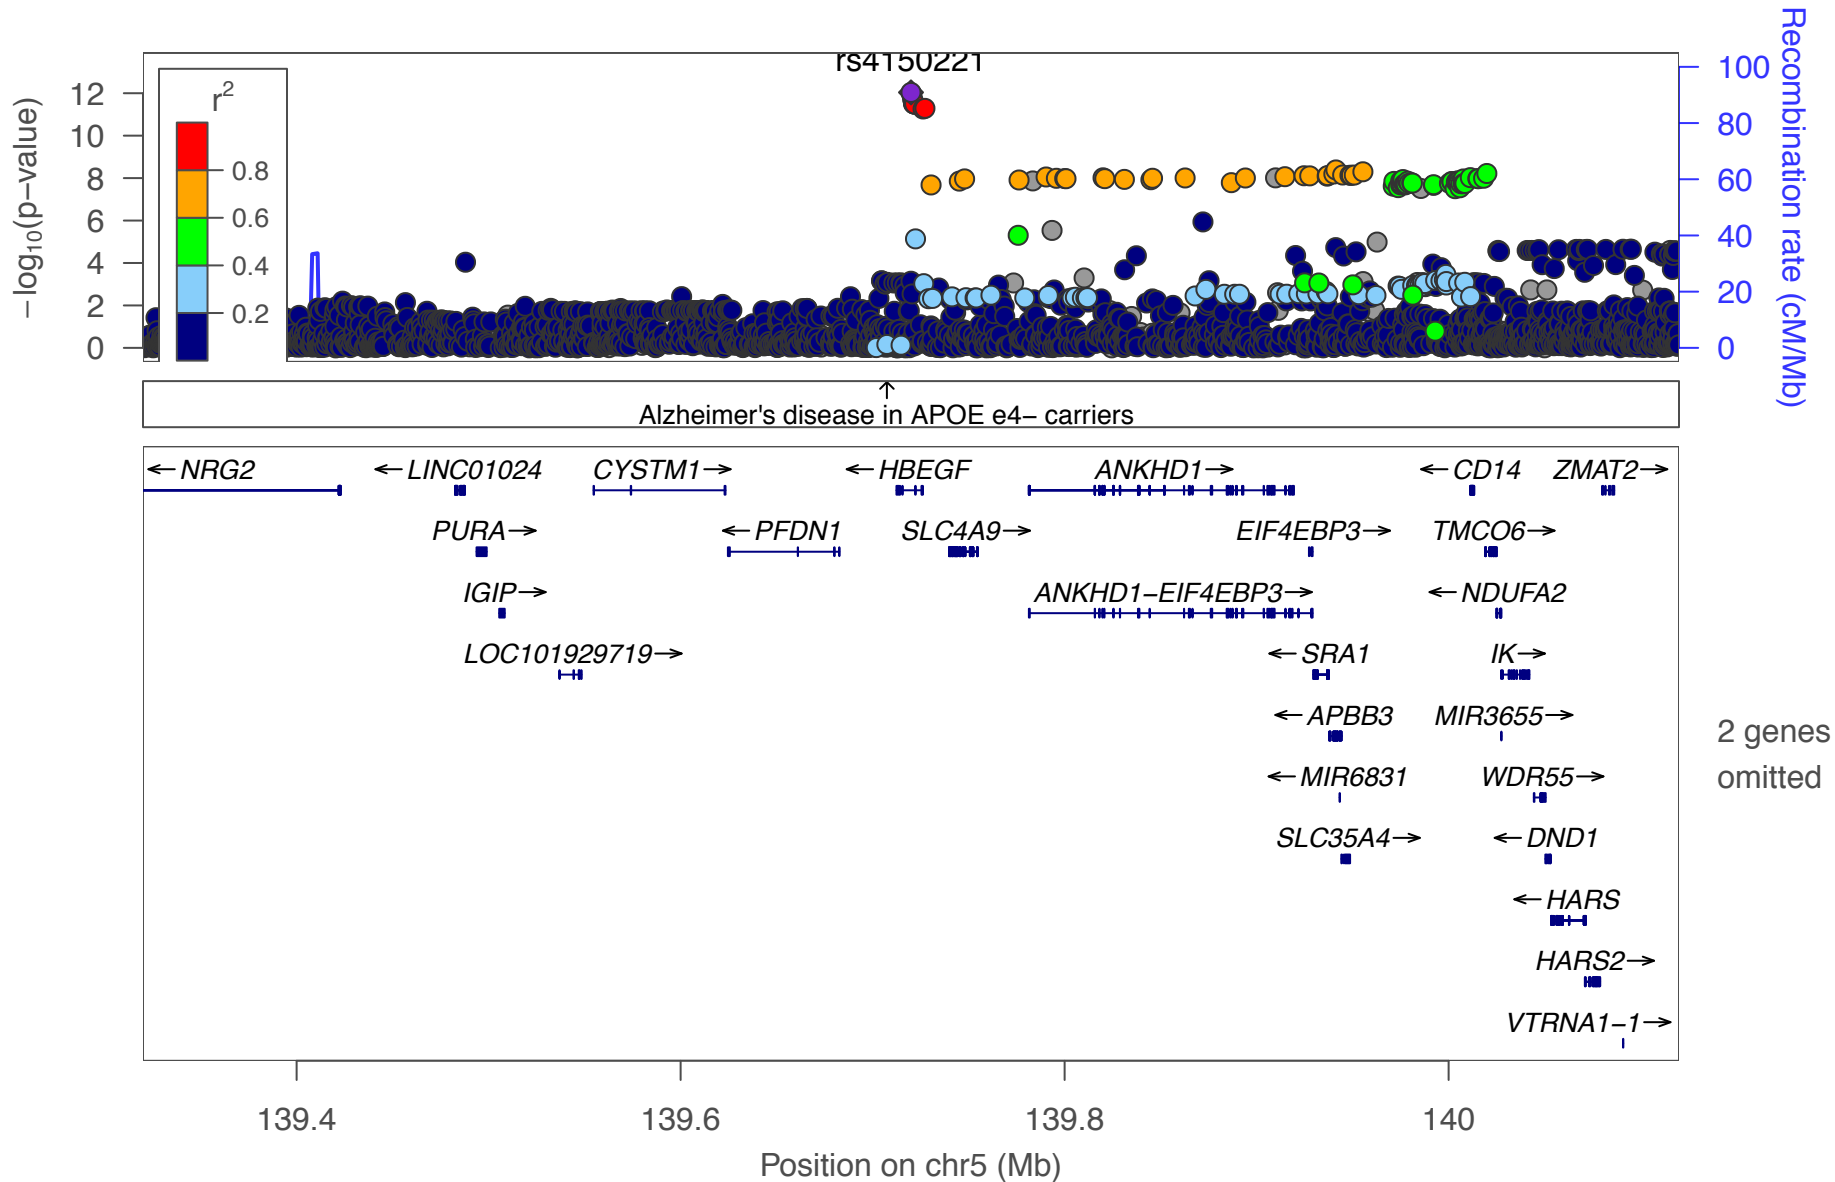

date: Thu Aug 17 17:58:47 2017

build: hg19

display range: chr5:139319991–140119991 [139319991–140119991]

hilite range: 0 – 0 [ 0 – 0 ]

reference SNP: chr5:139719991

number of SNPs plotted: 2368

min P.value: 9.14E–13 [chr5:139719991]

max P.value: 10E–1 [chr5:139713045]

omitted Genes: VTRNA1–2, VTRNA1–3

## GWAS Catalog SNPs in Region

| <b>chr</b> | <b>pos (Mb)</b> | <b>trait</b>                             | <b>snp</b> |
|------------|-----------------|------------------------------------------|------------|
| 5          | 139.7074        | Alzheimer's disease in APOE e4- carriers | rs11168036 |

# TBSS\_L2\_Splenium\_of\_corpus\_callosum

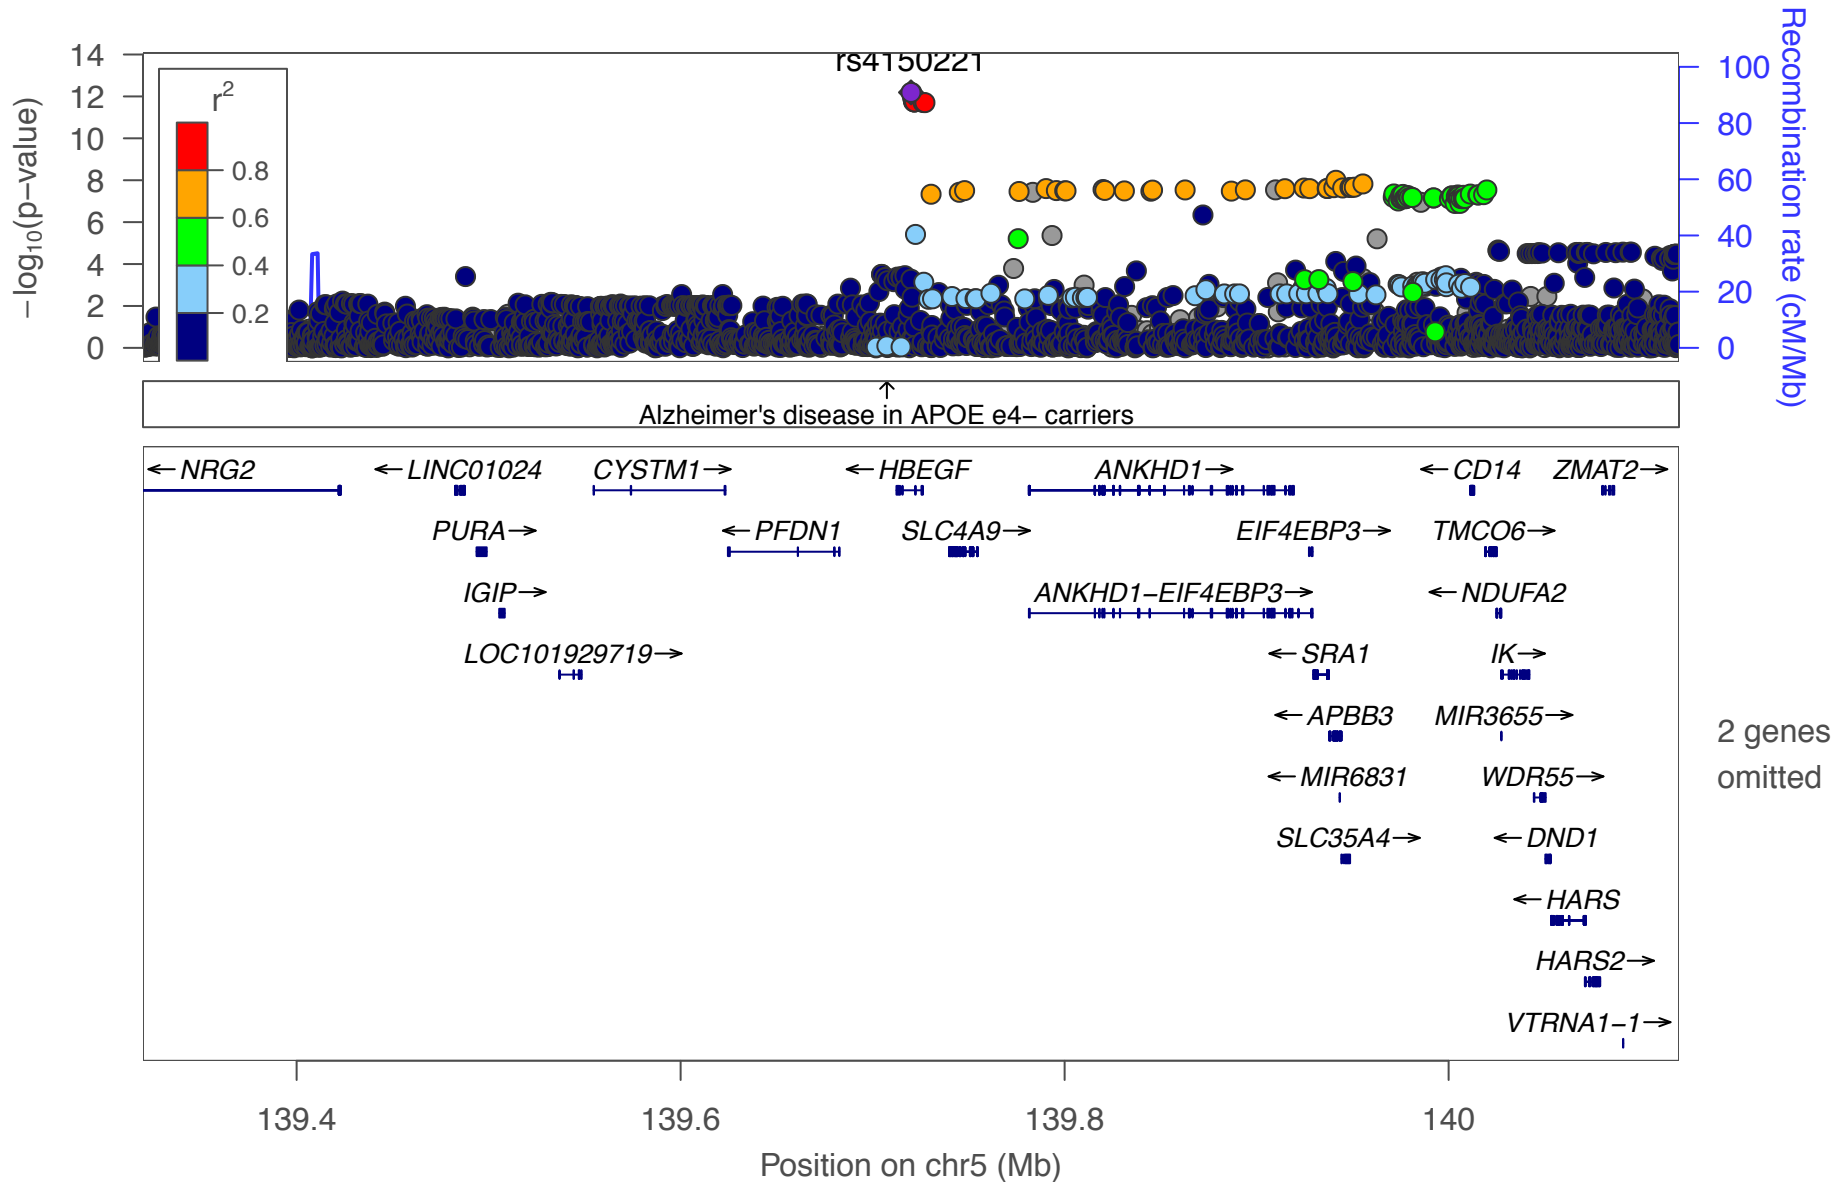



date: Thu Aug 17 17:58:41 2017

build: hg19

display range: chr5:139319991–140119991 [139319991–140119991]

hilite range: 0 – 0 [ 0 – 0 ]

reference SNP: chr5:139719991

number of SNPs plotted: 2368

min P.value: 6.43E–13 [chr5:139719991]

max P.value: 10E–1 [chr5:139906014]

omitted Genes: VTRNA1–2, VTRNA1–3

## GWAS Catalog SNPs in Region

| <b>chr</b> | <b>pos (Mb)</b> | <b>trait</b>                             | <b>snp</b> |
|------------|-----------------|------------------------------------------|------------|
| 5          | 139.7074        | Alzheimer's disease in APOE e4- carriers | rs11168036 |

# TBSS\_L3\_Splenium\_of\_corpus\_callosum

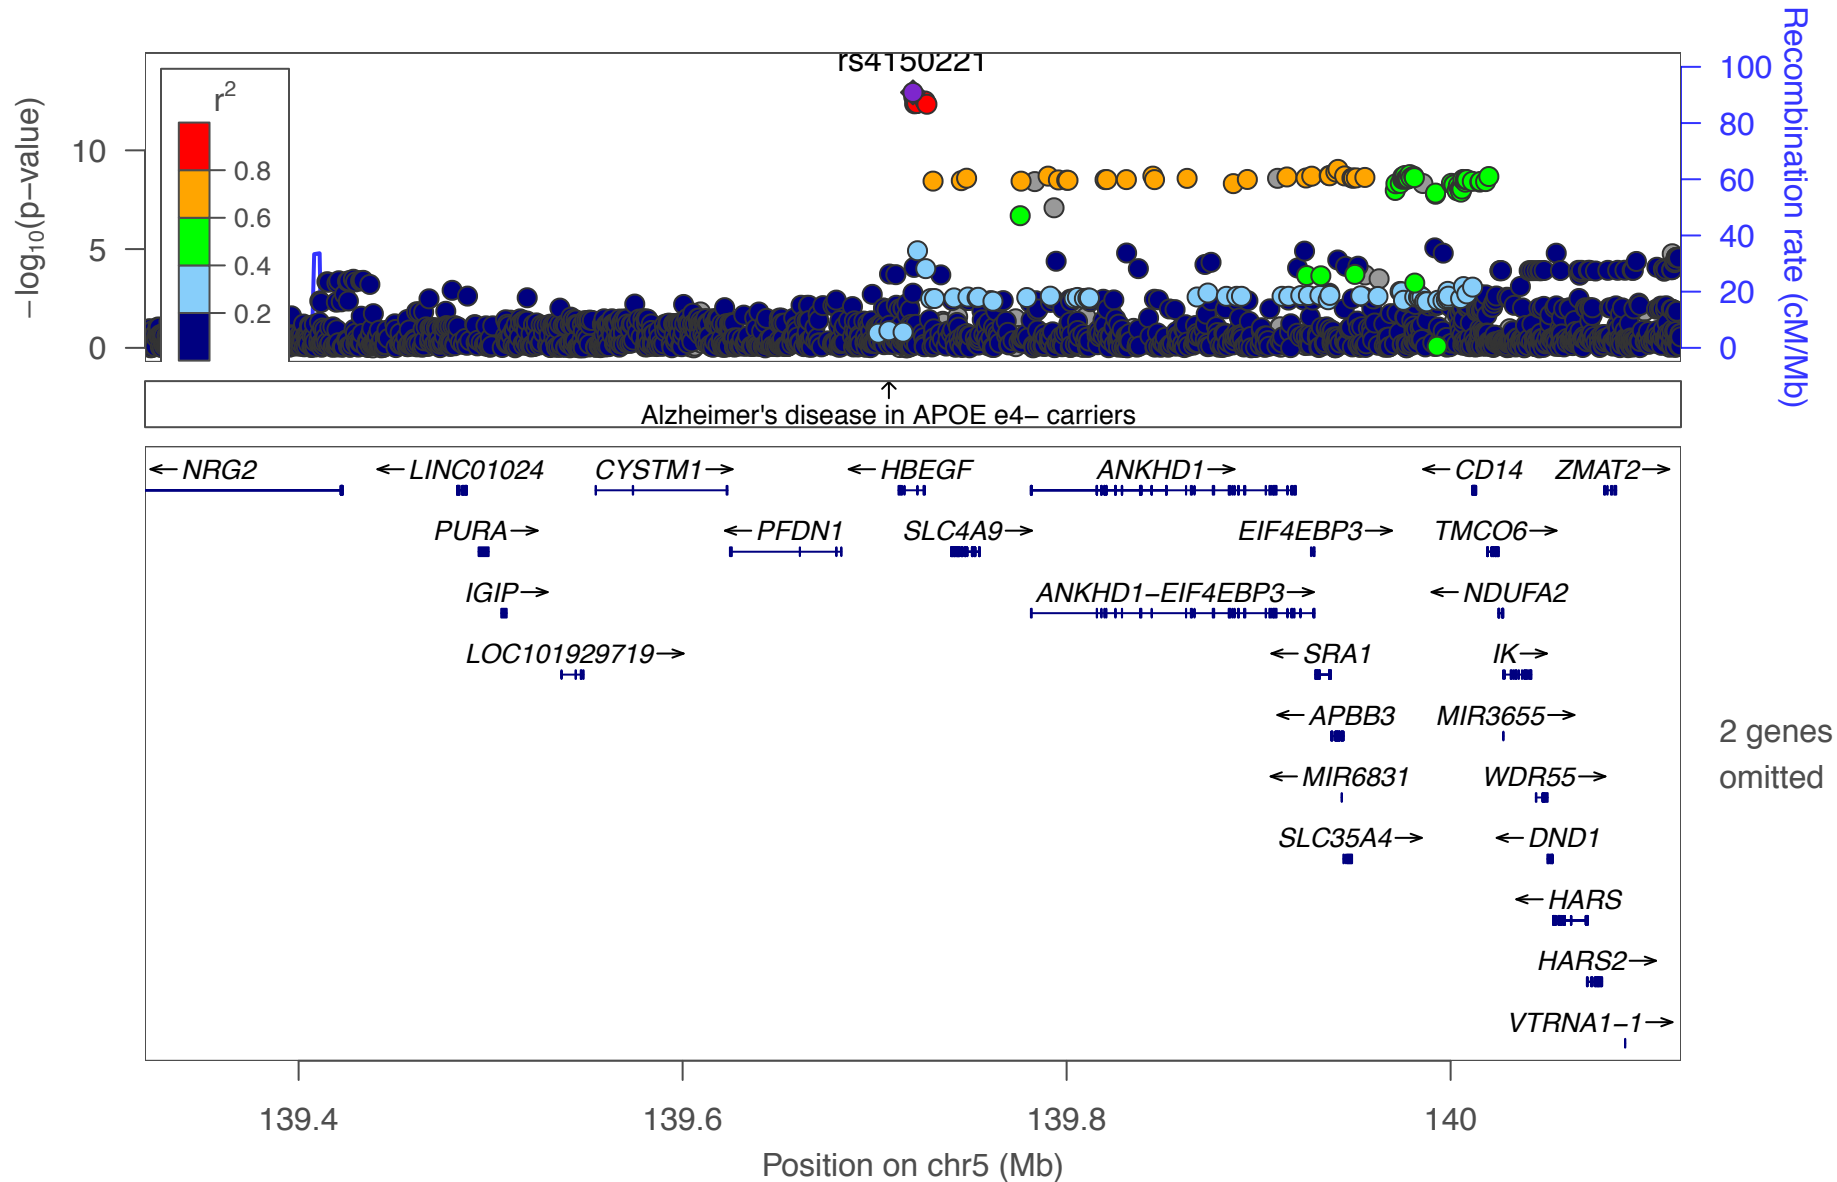

date: Thu Aug 17 18:05:48 2017

build: hg19

display range: chr5:139319991–140119991 [139319991–140119991]

hilite range: 0 – 0 [ 0 – 0 ]

reference SNP: chr5:139719991

number of SNPs plotted: 2368

min P.value: 1.17E–13 [chr5:139719991]

max P.value: 9.98E–1 [chr5:139438687]

omitted Genes: VTRNA1–2, VTRNA1–3

## GWAS Catalog SNPs in Region

| <b>chr</b> | <b>pos (Mb)</b> | <b>trait</b>                             | <b>snp</b> |
|------------|-----------------|------------------------------------------|------------|
| 5          | 139.7074        | Alzheimer's disease in APOE e4- carriers | rs11168036 |

# TBSS\_ICVF\_Genu\_of\_corpus\_callosum

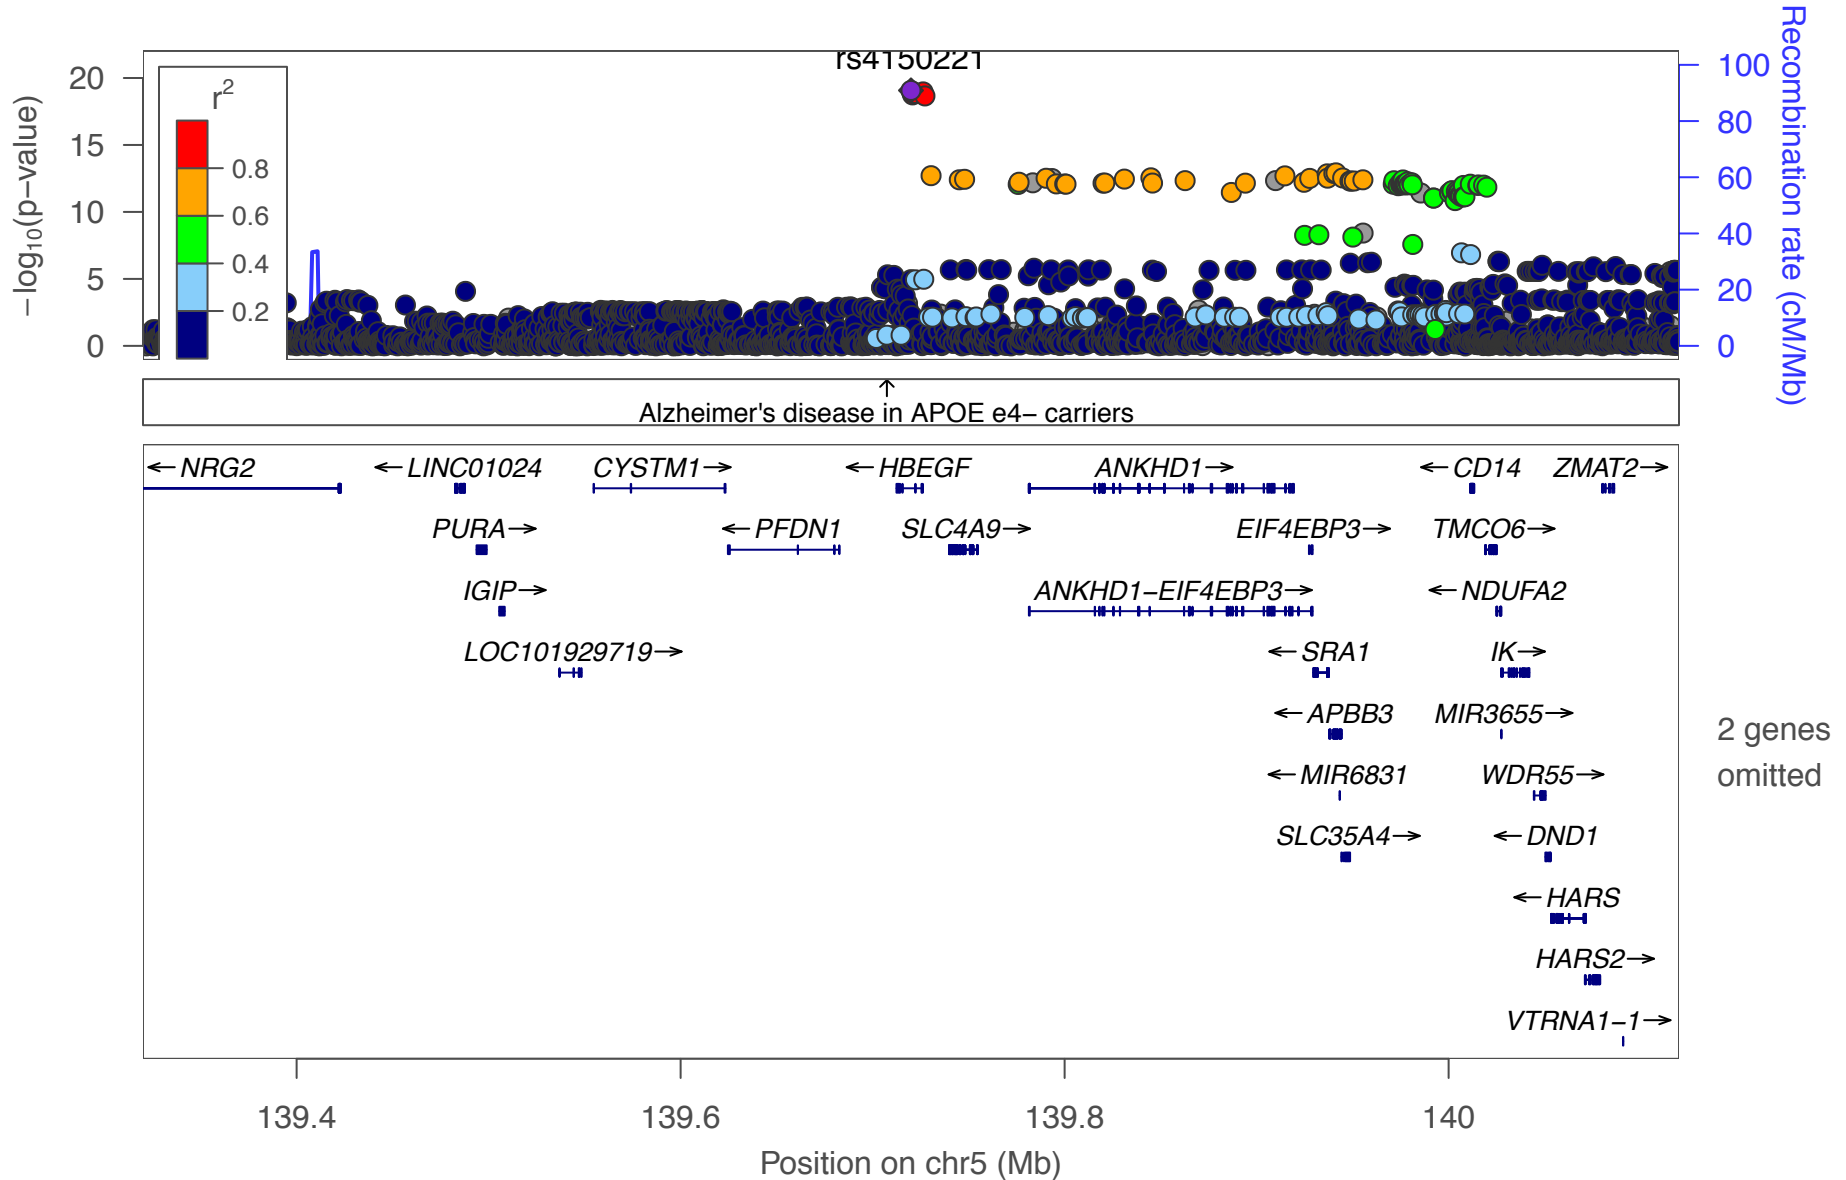

date: Thu Aug 17 18:10:46 2017

build: hg19

display range: chr5:139319991–140119991 [139319991–140119991]

hilite range: 0 – 0 [ 0 – 0 ]

reference SNP: chr5:139719991

number of SNPs plotted: 2368

min P.value: 8.43E–20 [chr5:139719991]

max P.value: 10E–1 [chr5:140008715]

omitted Genes: VTRNA1–2, VTRNA1–3

## GWAS Catalog SNPs in Region

| <b>chr</b> | <b>pos (Mb)</b> | <b>trait</b>                             | <b>snp</b> |
|------------|-----------------|------------------------------------------|------------|
| 5          | 139.7074        | Alzheimer's disease in APOE e4- carriers | rs11168036 |



# TBSS\_ICVF\_Body\_of\_corpus\_callosum

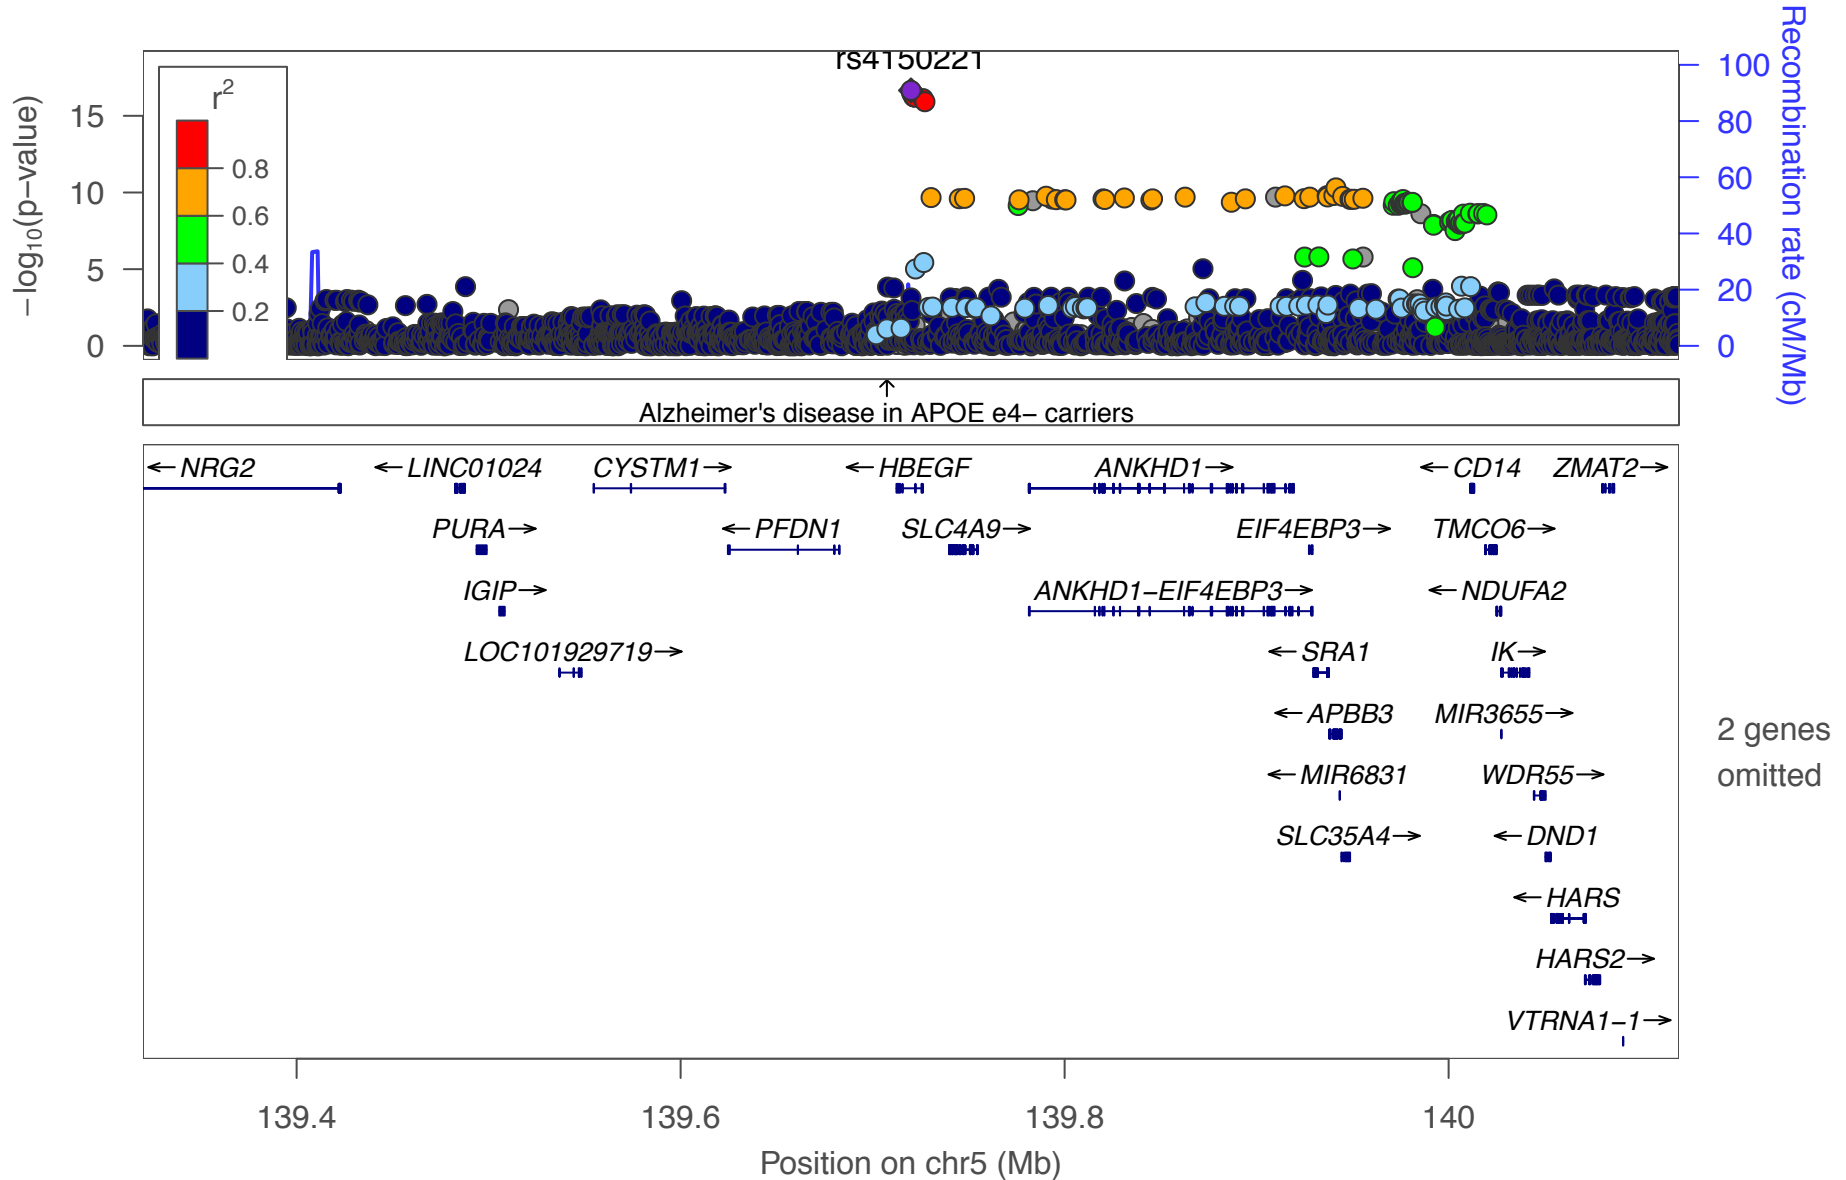

date: Thu Aug 17 18:35:50 2017

build: hg19

display range: chr5:139319991–140119991 [139319991–140119991]

hilite range: 0 – 0 [ 0 – 0 ]

reference SNP: chr5:139719991

number of SNPs plotted: 2368

min P.value: 2.2E–17 [chr5:139719991]

max P.value: 9.99E–1 [chr5:139656940]

omitted Genes: VTRNA1–2, VTRNA1–3

## GWAS Catalog SNPs in Region

| <b>chr</b> | <b>pos (Mb)</b> | <b>trait</b>                             | <b>snp</b> |
|------------|-----------------|------------------------------------------|------------|
| 5          | 139.7074        | Alzheimer's disease in APOE e4- carriers | rs11168036 |

# TBSS\_ICVF\_Splenium\_of\_corpus\_callosum

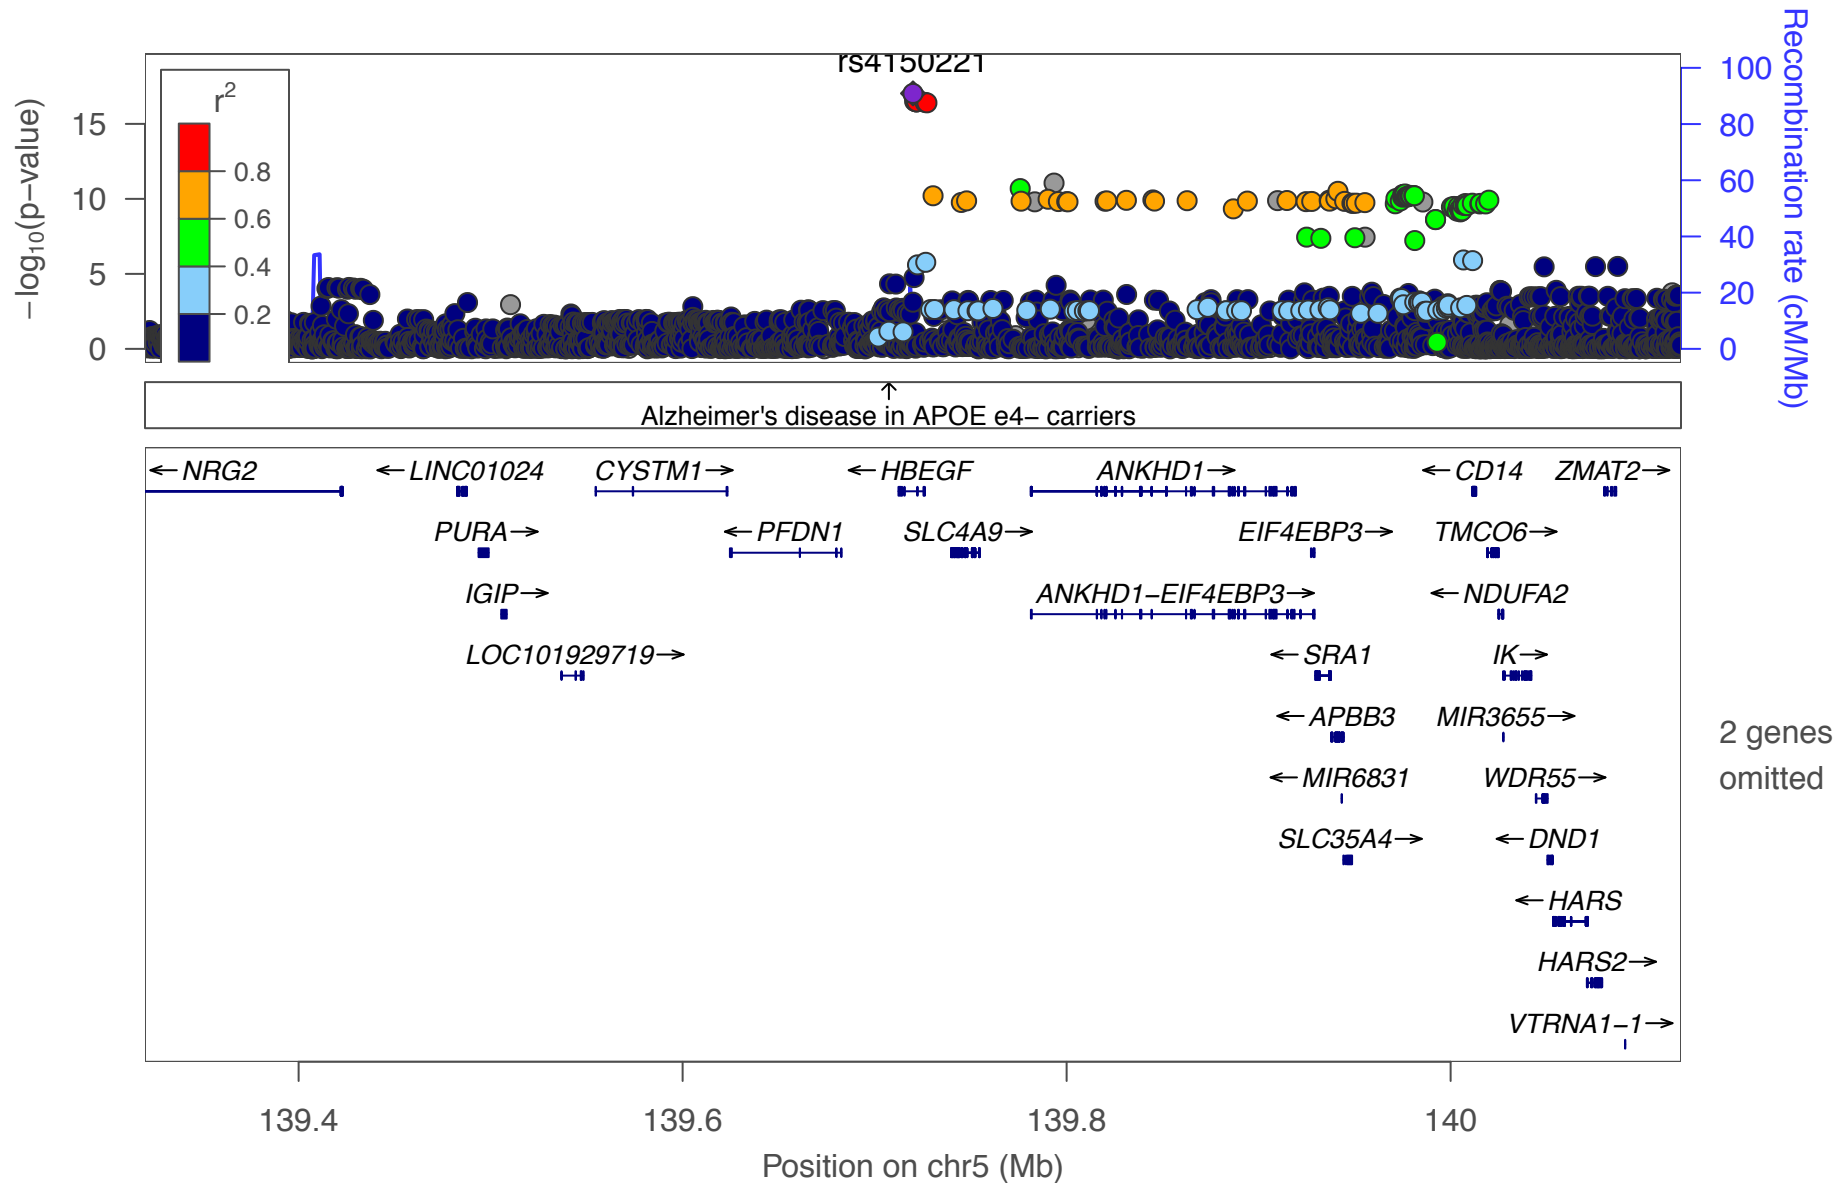

date: Thu Aug 17 18:35:50 2017

build: hg19

display range: chr5:139319991–140119991 [139319991–140119991]

hilite range: 0 – 0 [ 0 – 0 ]

reference SNP: chr5:139719991

number of SNPs plotted: 2368

min P.value: 9.29E–18 [chr5:139719991]

max P.value: 10E–1 [chr5:139406956]

omitted Genes: VTRNA1–2, VTRNA1–3

## GWAS Catalog SNPs in Region

| <b>chr</b> | <b>pos (Mb)</b> | <b>trait</b>                             | <b>snp</b> |
|------------|-----------------|------------------------------------------|------------|
| 5          | 139.7074        | Alzheimer's disease in APOE e4- carriers | rs11168036 |

# ProbtrackX\_ICVF\_fmi

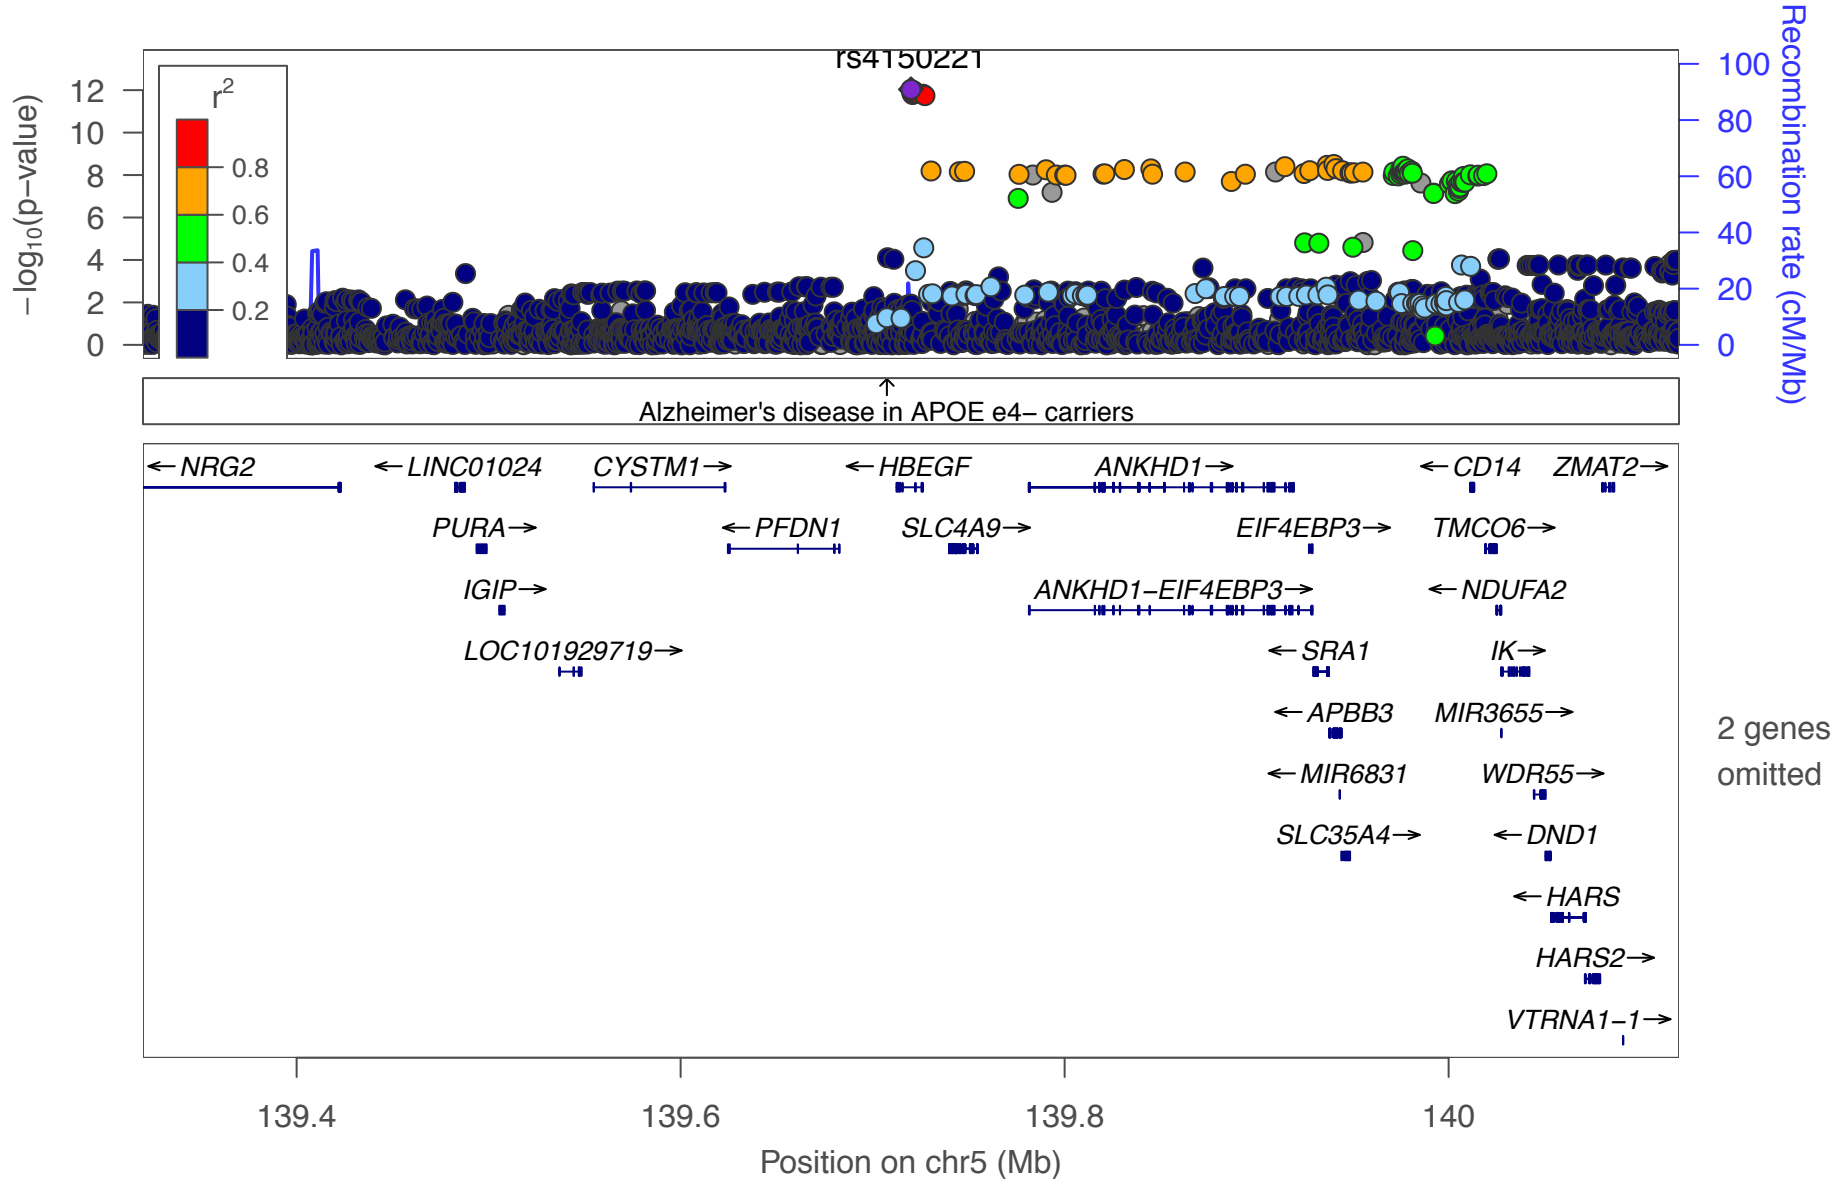

date: Thu Aug 17 18:35:50 2017

build: hg19

display range: chr5:139319991–140119991 [139319991–140119991]

hilite range: 0 – 0 [ 0 – 0 ]

reference SNP: chr5:139719991

number of SNPs plotted: 2368

min P.value: 9.23E–13 [chr5:139719991]

max P.value: 9.99E–1 [chr5:139600618]

omitted Genes: VTRNA1–2, VTRNA1–3



## GWAS Catalog SNPs in Region

| <b>chr</b> | <b>pos (Mb)</b> | <b>trait</b>                             | <b>snp</b> |
|------------|-----------------|------------------------------------------|------------|
| 5          | 139.7074        | Alzheimer's disease in APOE e4- carriers | rs11168036 |

# SWI\_T2star\_left\_putamen

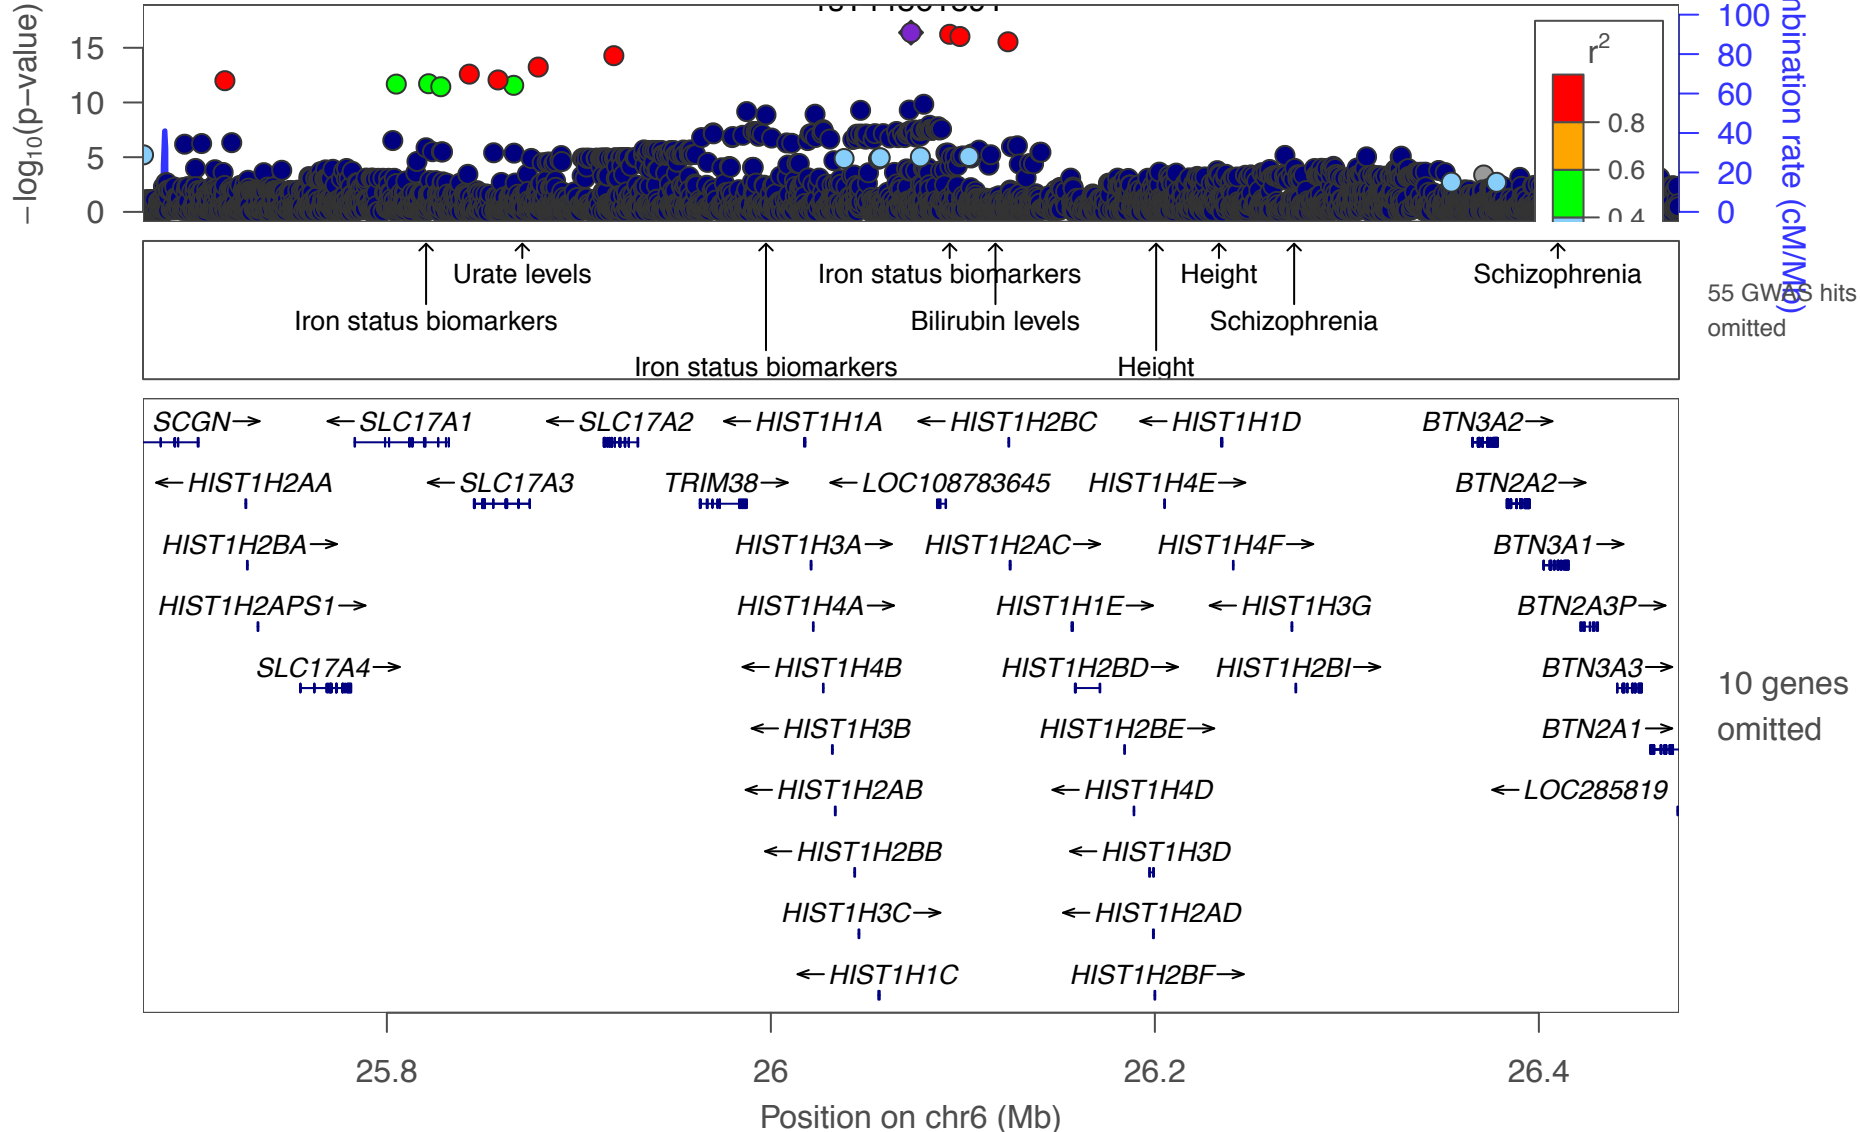

date: Thu Aug 17 18:10:22 2017

build: hg19

display range: chr6:25672992–26472992 [25672992–26472992]

hilite range: 0 – 0 [ 0 – 0 ]

reference SNP: chr6:26072992

number of SNPs plotted: 4565

min P.value: 4.09E–17 [chr6:26072992]

max P.value: 9.99E–1 [chr6:26074151]

omitted Genes: HFE, HIST1H4C, HIST1H1T

omitted Genes: HIST1H2BG, HIST1H2AE, HIST1H3E

omitted Genes: HIST1H4G, HIST1H3F, HIST1H2BH

omitted Genes: HIST1H4H

omitted GWAS Hits: chr6:26.200677–Height, chr6:26.40989–Schizophrenia

omitted GWAS Hits: NA, NA

Make more plots at <http://csg.sph.umich.edu/locuszoom/>

omitted GWAS Hits: NA, NA

GWAS Catalog SNPs in Region

| chr | pos (Mb) | trait                                  | snp        |
|-----|----------|----------------------------------------|------------|
| 6   | 25.77205 | Carotid intima media thickness         | rs4712972  |
| 6   | 25.77381 | Urate levels in lean individuals       | rs2275906  |
| 6   | 25.77695 | Cardiovascular disease risk factors    | rs11754288 |
| 6   | 25.77695 | Blood metabolite levels                | rs11754288 |
| 6   | 25.79443 | Blood metabolite levels                | rs2762353  |
| 6   | 25.80132 | Urate levels in overweight individuals | rs1165209  |
| 6   | 25.80132 | Urate levels in lean individuals       | rs1165209  |
| 6   | 25.81315 | Urate levels                           | rs1165196  |
| 6   | 25.81315 | Serum uric acid levels                 | rs1165196  |
| 6   | 25.81315 | Urate levels in overweight individuals | rs1165196  |
| 6   | 25.81859 | Blood metabolite ratios                | rs1185567  |
| 6   | 25.81877 | Urate levels in overweight individuals | rs1165152  |
| 6   | 25.82044 | Iron status biomarkers                 | rs17270561 |
| 6   | 25.82162 | Urate levels                           | rs1165151  |
| 6   | 25.82177 | Red blood cell traits                  | rs17342717 |
| 6   | 25.82177 | Iron status biomarkers                 | rs17342717 |
| 6   | 25.82344 | Uric acid levels                       | rs1183201  |
| 6   | 25.84295 | Hematology traits                      | rs1408272  |
| 6   | 25.84295 | Iron status biomarkers                 | rs1408272  |
| 6   | 25.84295 | Red blood cell traits                  | rs1408272  |
| 6   | 25.84295 | Mean corpuscular hemoglobin            | rs1408272  |

GWAS Catalog SNPs in Region

| chr | pos (Mb) | trait                                           | snp        |
|-----|----------|-------------------------------------------------|------------|
| 6   | 25.86937 | Homocysteine levels                             | rs548987   |
| 6   | 25.87054 | Urate levels                                    | rs1165205  |
| 6   | 25.87442 | Schizophrenia                                   | rs13198474 |
| 6   | 25.89558 | Blood pressure                                  | rs6910741  |
| 6   | 25.91698 | Height                                          | rs1865760  |
| 6   | 25.99746 | Iron status biomarkers                          | rs12216125 |
| 6   | 26.03161 | HIV-1 viral setpoint                            | rs10484434 |
| 6   | 26.09118 | Diastolic blood pressure                        | rs1799945  |
| 6   | 26.09118 | Hypertension                                    | rs1799945  |
| 6   | 26.09118 | Systolic blood pressure                         | rs1799945  |
| 6   | 26.09118 | Iron status biomarkers                          | rs1799945  |
| 6   | 26.09314 | Iron status biomarkers                          | rs1800562  |
| 6   | 26.09314 | Hematological parameters                        | rs1800562  |
| 6   | 26.09314 | Hepcidin levels                                 | rs1800562  |
| 6   | 26.09314 | Cardiovascular disease risk factors             | rs1800562  |
| 6   | 26.09314 | LDL cholesterol                                 | rs1800562  |
| 6   | 26.09314 | Glycated hemoglobin levels                      | rs1800562  |
| 6   | 26.09314 | Red blood cell traits                           | rs1800562  |
| 6   | 26.09314 | Alcohol consumption (transferrin glycosylation) | rs1800562  |
| 6   | 26.09314 | Cholesterol, total                              | rs1800562  |
| 6   | 26.09314 | Hematology traits                               | rs1800562  |

GWAS Catalog SNPs in Region

| chr | pos (Mb) | trait                                                            | snp        |
|-----|----------|------------------------------------------------------------------|------------|
| 6   | 26.09314 | Hemoglobin                                                       | rs1800562  |
| 6   | 26.09314 | Hematocrit                                                       | rs1800562  |
| 6   | 26.09314 | Mean corpuscular volume                                          | rs1800562  |
| 6   | 26.09314 | Iron status biomarkers (ferritin levels)                         | rs1800562  |
| 6   | 26.09314 | Iron status biomarkers (transferrin saturation)                  | rs1800562  |
| 6   | 26.09314 | Iron status biomarkers (transferrin levels)                      | rs1800562  |
| 6   | 26.09314 | Iron status biomarkers (iron levels)                             | rs1800562  |
| 6   | 26.09314 | Mean corpuscular hemoglobin                                      | rs1800562  |
| 6   | 26.09738 | Schizophrenia                                                    | rs6918586  |
| 6   | 26.10746 | Blood pressure                                                   | rs198846   |
| 6   | 26.10746 | Hemoglobin                                                       | rs198846   |
| 6   | 26.10746 | Mean corpuscular volume                                          | rs198846   |
| 6   | 26.11698 | Bilirubin levels                                                 | rs12206204 |
| 6   | 26.12845 | Narcolepsy with cataplexy                                        | rs198811   |
| 6   | 26.15748 | Height                                                           | rs4141885  |
| 6   | 26.20068 | Height                                                           | rs806794   |
| 6   | 26.23339 | Height                                                           | rs10946808 |
| 6   | 26.26007 | Plasma omega–6 polyunsaturated fatty acid levels (linoleic acid) | rs4476815  |
| 6   | 26.27255 | Schizophrenia                                                    | rs61747867 |
| 6   | 26.27665 | Educational attainment                                           | rs9393692  |
| 6   | 26.32589 | Educational attainment (years of education)                      | rs2179152  |

## GWAS Catalog SNPs in Region

| chr | pos (Mb) | trait         | snp        |
|-----|----------|---------------|------------|
| 6   | 26.40989 | Schizophrenia | rs41266839 |

# SWI\_T2star\_left\_putamen\_plus\_right\_putamen

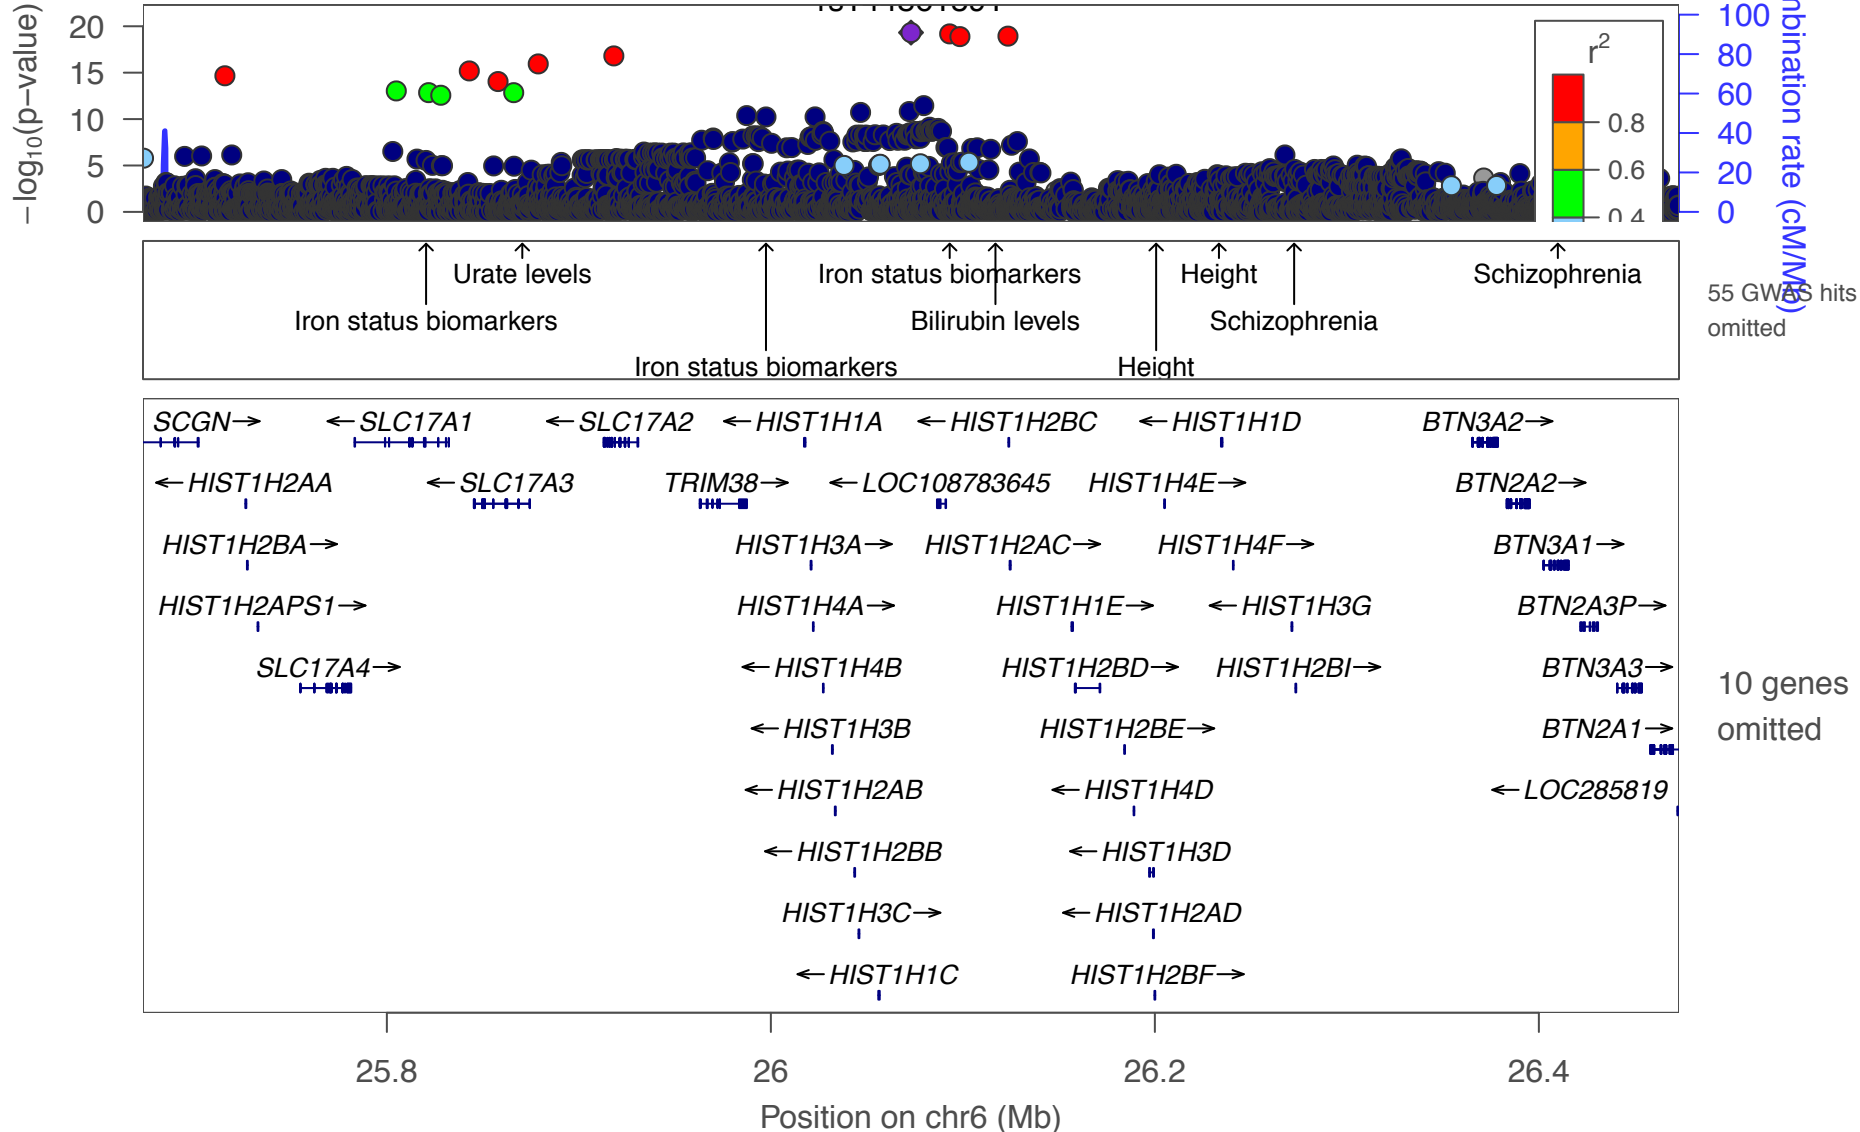



date: Thu Aug 17 18:18:43 2017

build: hg19

display range: chr6:25672992–26472992 [25672992–26472992]

hilite range: 0 – 0 [ 0 – 0 ]

reference SNP: chr6:26072992

number of SNPs plotted: 4565

min P.value: 4.81E–20 [chr6:26072992]

max P.value: 9.99E–1 [chr6:25971279]

omitted Genes: HFE, HIST1H4C, HIST1H1T

omitted Genes: HIST1H2BG, HIST1H2AE, HIST1H3E

omitted Genes: HIST1H4G, HIST1H3F, HIST1H2BH

omitted Genes: HIST1H4H

omitted GWAS Hits: chr6:26.200677–Height, chr6:26.40989–Schizophrenia

omitted GWAS Hits: NA, NA

Make more plots at <http://csg.sph.umich.edu/locuszoom/>

omitted GWAS Hits: NA, NA

GWAS Catalog SNPs in Region

| chr | pos (Mb) | trait                                  | snp        |
|-----|----------|----------------------------------------|------------|
| 6   | 25.77205 | Carotid intima media thickness         | rs4712972  |
| 6   | 25.77381 | Urate levels in lean individuals       | rs2275906  |
| 6   | 25.77695 | Cardiovascular disease risk factors    | rs11754288 |
| 6   | 25.77695 | Blood metabolite levels                | rs11754288 |
| 6   | 25.79443 | Blood metabolite levels                | rs2762353  |
| 6   | 25.80132 | Urate levels in overweight individuals | rs1165209  |
| 6   | 25.80132 | Urate levels in lean individuals       | rs1165209  |
| 6   | 25.81315 | Urate levels                           | rs1165196  |
| 6   | 25.81315 | Serum uric acid levels                 | rs1165196  |
| 6   | 25.81315 | Urate levels in overweight individuals | rs1165196  |
| 6   | 25.81859 | Blood metabolite ratios                | rs1185567  |
| 6   | 25.81877 | Urate levels in overweight individuals | rs1165152  |
| 6   | 25.82044 | Iron status biomarkers                 | rs17270561 |
| 6   | 25.82162 | Urate levels                           | rs1165151  |
| 6   | 25.82177 | Red blood cell traits                  | rs17342717 |
| 6   | 25.82177 | Iron status biomarkers                 | rs17342717 |
| 6   | 25.82344 | Uric acid levels                       | rs1183201  |
| 6   | 25.84295 | Hematology traits                      | rs1408272  |
| 6   | 25.84295 | Iron status biomarkers                 | rs1408272  |
| 6   | 25.84295 | Red blood cell traits                  | rs1408272  |
| 6   | 25.84295 | Mean corpuscular hemoglobin            | rs1408272  |

GWAS Catalog SNPs in Region

| chr | pos (Mb) | trait                                           | snp        |
|-----|----------|-------------------------------------------------|------------|
| 6   | 25.86937 | Homocysteine levels                             | rs548987   |
| 6   | 25.87054 | Urate levels                                    | rs1165205  |
| 6   | 25.87442 | Schizophrenia                                   | rs13198474 |
| 6   | 25.89558 | Blood pressure                                  | rs6910741  |
| 6   | 25.91698 | Height                                          | rs1865760  |
| 6   | 25.99746 | Iron status biomarkers                          | rs12216125 |
| 6   | 26.03161 | HIV-1 viral setpoint                            | rs10484434 |
| 6   | 26.09118 | Diastolic blood pressure                        | rs1799945  |
| 6   | 26.09118 | Hypertension                                    | rs1799945  |
| 6   | 26.09118 | Systolic blood pressure                         | rs1799945  |
| 6   | 26.09118 | Iron status biomarkers                          | rs1799945  |
| 6   | 26.09314 | Iron status biomarkers                          | rs1800562  |
| 6   | 26.09314 | Hematological parameters                        | rs1800562  |
| 6   | 26.09314 | Hepcidin levels                                 | rs1800562  |
| 6   | 26.09314 | Cardiovascular disease risk factors             | rs1800562  |
| 6   | 26.09314 | LDL cholesterol                                 | rs1800562  |
| 6   | 26.09314 | Glycated hemoglobin levels                      | rs1800562  |
| 6   | 26.09314 | Red blood cell traits                           | rs1800562  |
| 6   | 26.09314 | Alcohol consumption (transferrin glycosylation) | rs1800562  |
| 6   | 26.09314 | Cholesterol, total                              | rs1800562  |
| 6   | 26.09314 | Hematology traits                               | rs1800562  |

GWAS Catalog SNPs in Region

| chr | pos (Mb) | trait                                                            | snp        |
|-----|----------|------------------------------------------------------------------|------------|
| 6   | 26.09314 | Hemoglobin                                                       | rs1800562  |
| 6   | 26.09314 | Hematocrit                                                       | rs1800562  |
| 6   | 26.09314 | Mean corpuscular volume                                          | rs1800562  |
| 6   | 26.09314 | Iron status biomarkers (ferritin levels)                         | rs1800562  |
| 6   | 26.09314 | Iron status biomarkers (transferrin saturation)                  | rs1800562  |
| 6   | 26.09314 | Iron status biomarkers (transferrin levels)                      | rs1800562  |
| 6   | 26.09314 | Iron status biomarkers (iron levels)                             | rs1800562  |
| 6   | 26.09314 | Mean corpuscular hemoglobin                                      | rs1800562  |
| 6   | 26.09738 | Schizophrenia                                                    | rs6918586  |
| 6   | 26.10746 | Blood pressure                                                   | rs198846   |
| 6   | 26.10746 | Hemoglobin                                                       | rs198846   |
| 6   | 26.10746 | Mean corpuscular volume                                          | rs198846   |
| 6   | 26.11698 | Bilirubin levels                                                 | rs12206204 |
| 6   | 26.12845 | Narcolepsy with cataplexy                                        | rs198811   |
| 6   | 26.15748 | Height                                                           | rs4141885  |
| 6   | 26.20068 | Height                                                           | rs806794   |
| 6   | 26.23339 | Height                                                           | rs10946808 |
| 6   | 26.26007 | Plasma omega–6 polyunsaturated fatty acid levels (linoleic acid) | rs4476815  |
| 6   | 26.27255 | Schizophrenia                                                    | rs61747867 |
| 6   | 26.27665 | Educational attainment                                           | rs9393692  |
| 6   | 26.32589 | Educational attainment (years of education)                      | rs2179152  |

## GWAS Catalog SNPs in Region

| chr | pos (Mb) | trait         | snp        |
|-----|----------|---------------|------------|
| 6   | 26.40989 | Schizophrenia | rs41266839 |

# SWI\_T2star\_right\_putamen

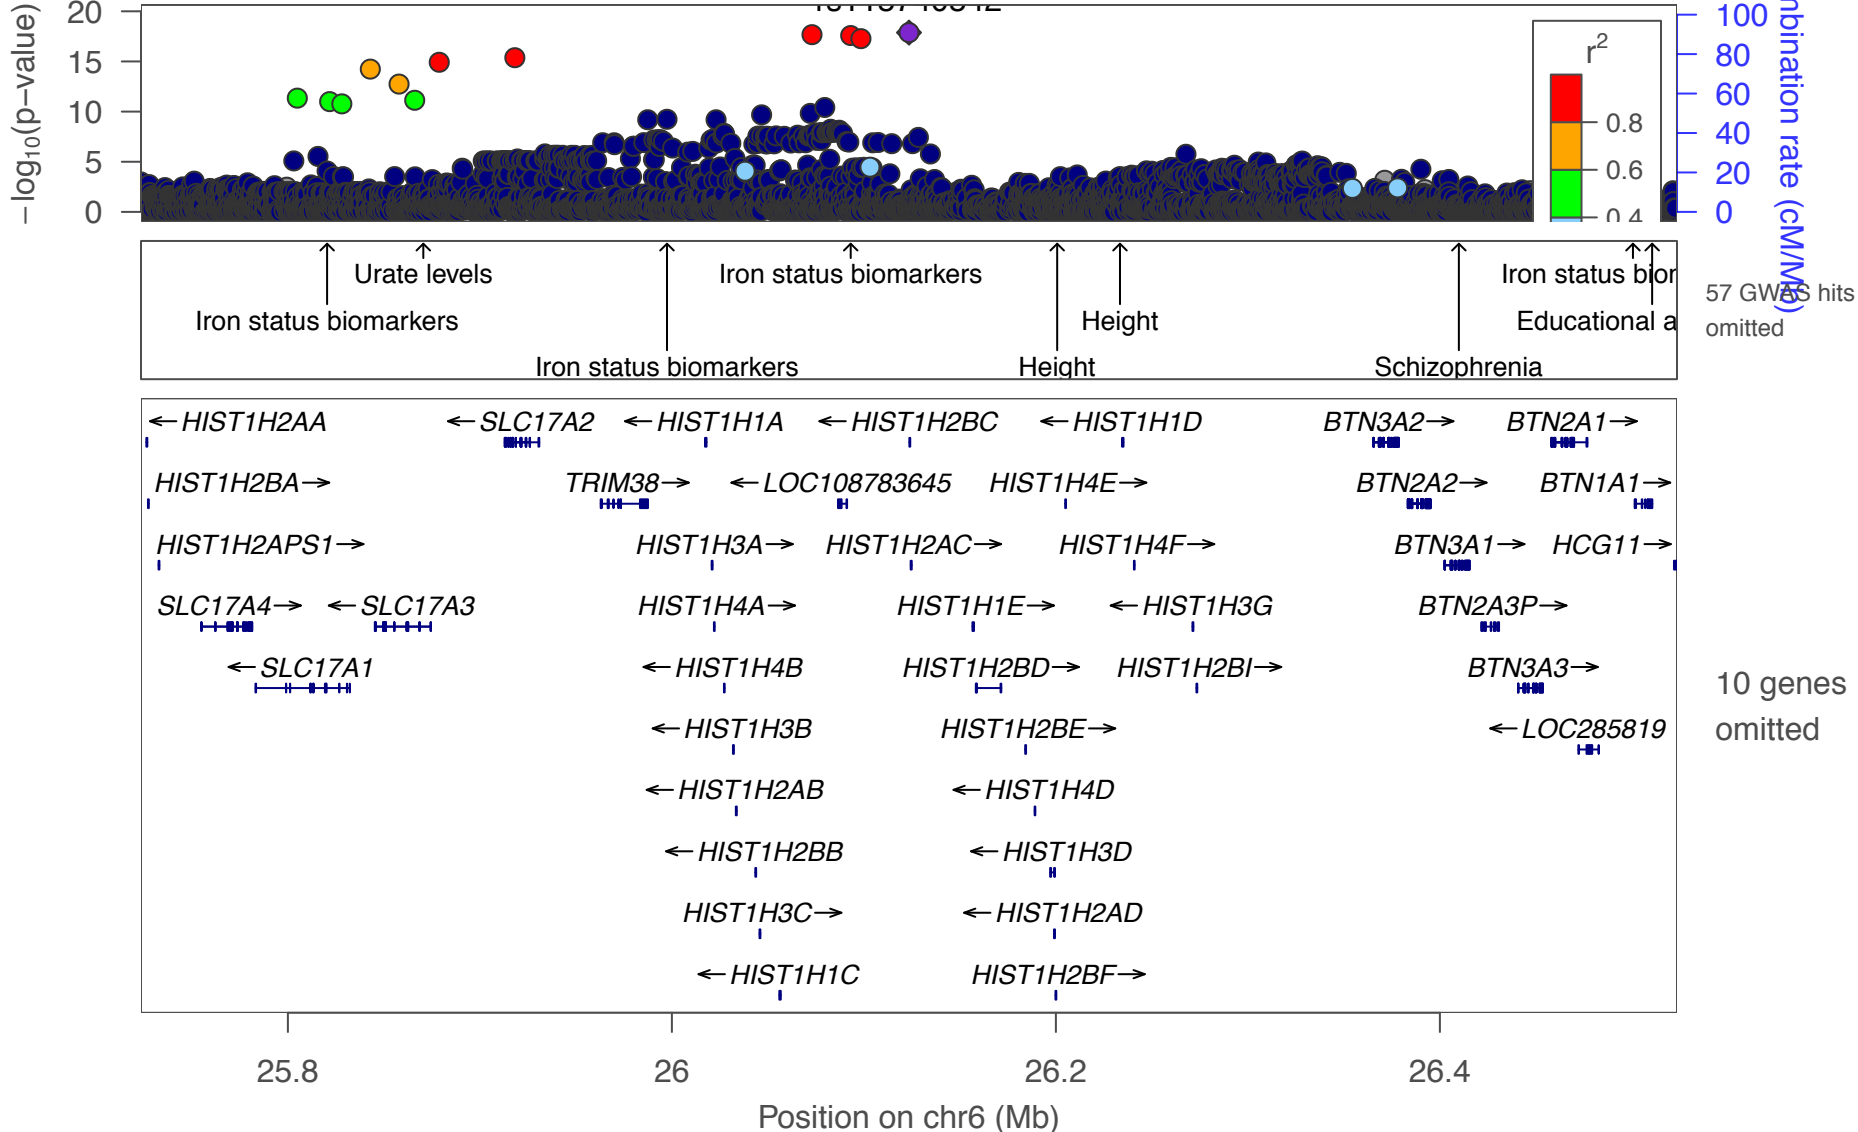

date: Thu Aug 17 18:14:04 2017

build: hg19

display range: chr6:25723502–26523502 [25723502–26523502]

hilite range: 0 – 0 [ 0 – 0 ]

reference SNP: chr6:26123502

number of SNPs plotted: 4507

min P.value: 1.33E–18 [chr6:26123502]

max P.value: 9.98E–1 [chr6:26104008]

omitted Genes: HFE, HIST1H4C, HIST1H1T

omitted Genes: HIST1H2BG, HIST1H2AE, HIST1H3E

omitted Genes: HIST1H4G, HIST1H3F, HIST1H2BH

omitted Genes: HIST1H4H

omitted GWAS Hits: chr6:26.510564–Educational attainment, chr6:26.200677–Height

omitted GWAS Hits: NA, NA

Make more plots at <http://csg.sph.umich.edu/locuszoom/>

omitted GWAS Hits: NA, NA

GWAS Catalog SNPs in Region

| chr | pos (Mb) | trait                                  | snp        |
|-----|----------|----------------------------------------|------------|
| 6   | 25.77205 | Carotid intima media thickness         | rs4712972  |
| 6   | 25.77381 | Urate levels in lean individuals       | rs2275906  |
| 6   | 25.77695 | Cardiovascular disease risk factors    | rs11754288 |
| 6   | 25.77695 | Blood metabolite levels                | rs11754288 |
| 6   | 25.79443 | Blood metabolite levels                | rs2762353  |
| 6   | 25.80132 | Urate levels in overweight individuals | rs1165209  |
| 6   | 25.80132 | Urate levels in lean individuals       | rs1165209  |
| 6   | 25.81315 | Urate levels                           | rs1165196  |
| 6   | 25.81315 | Serum uric acid levels                 | rs1165196  |
| 6   | 25.81315 | Urate levels in overweight individuals | rs1165196  |
| 6   | 25.81859 | Blood metabolite ratios                | rs1185567  |
| 6   | 25.81877 | Urate levels in overweight individuals | rs1165152  |
| 6   | 25.82044 | Iron status biomarkers                 | rs17270561 |
| 6   | 25.82162 | Urate levels                           | rs1165151  |
| 6   | 25.82177 | Red blood cell traits                  | rs17342717 |
| 6   | 25.82177 | Iron status biomarkers                 | rs17342717 |
| 6   | 25.82344 | Uric acid levels                       | rs1183201  |
| 6   | 25.84295 | Hematology traits                      | rs1408272  |
| 6   | 25.84295 | Iron status biomarkers                 | rs1408272  |
| 6   | 25.84295 | Red blood cell traits                  | rs1408272  |
| 6   | 25.84295 | Mean corpuscular hemoglobin            | rs1408272  |



GWAS Catalog SNPs in Region

| chr | pos (Mb) | trait                                           | snp        |
|-----|----------|-------------------------------------------------|------------|
| 6   | 25.86937 | Homocysteine levels                             | rs548987   |
| 6   | 25.87054 | Urate levels                                    | rs1165205  |
| 6   | 25.87442 | Schizophrenia                                   | rs13198474 |
| 6   | 25.89558 | Blood pressure                                  | rs6910741  |
| 6   | 25.91698 | Height                                          | rs1865760  |
| 6   | 25.99746 | Iron status biomarkers                          | rs12216125 |
| 6   | 26.03161 | HIV-1 viral setpoint                            | rs10484434 |
| 6   | 26.09118 | Diastolic blood pressure                        | rs1799945  |
| 6   | 26.09118 | Hypertension                                    | rs1799945  |
| 6   | 26.09118 | Systolic blood pressure                         | rs1799945  |
| 6   | 26.09118 | Iron status biomarkers                          | rs1799945  |
| 6   | 26.09314 | Iron status biomarkers                          | rs1800562  |
| 6   | 26.09314 | Hematological parameters                        | rs1800562  |
| 6   | 26.09314 | Hepcidin levels                                 | rs1800562  |
| 6   | 26.09314 | Cardiovascular disease risk factors             | rs1800562  |
| 6   | 26.09314 | LDL cholesterol                                 | rs1800562  |
| 6   | 26.09314 | Glycated hemoglobin levels                      | rs1800562  |
| 6   | 26.09314 | Red blood cell traits                           | rs1800562  |
| 6   | 26.09314 | Alcohol consumption (transferrin glycosylation) | rs1800562  |
| 6   | 26.09314 | Cholesterol, total                              | rs1800562  |
| 6   | 26.09314 | Hematology traits                               | rs1800562  |

GWAS Catalog SNPs in Region

| chr | pos (Mb) | trait                                                            | snp        |
|-----|----------|------------------------------------------------------------------|------------|
| 6   | 26.09314 | Hemoglobin                                                       | rs1800562  |
| 6   | 26.09314 | Hematocrit                                                       | rs1800562  |
| 6   | 26.09314 | Mean corpuscular volume                                          | rs1800562  |
| 6   | 26.09314 | Iron status biomarkers (ferritin levels)                         | rs1800562  |
| 6   | 26.09314 | Iron status biomarkers (transferrin saturation)                  | rs1800562  |
| 6   | 26.09314 | Iron status biomarkers (transferrin levels)                      | rs1800562  |
| 6   | 26.09314 | Iron status biomarkers (iron levels)                             | rs1800562  |
| 6   | 26.09314 | Mean corpuscular hemoglobin                                      | rs1800562  |
| 6   | 26.09738 | Schizophrenia                                                    | rs6918586  |
| 6   | 26.10746 | Blood pressure                                                   | rs198846   |
| 6   | 26.10746 | Hemoglobin                                                       | rs198846   |
| 6   | 26.10746 | Mean corpuscular volume                                          | rs198846   |
| 6   | 26.11698 | Bilirubin levels                                                 | rs12206204 |
| 6   | 26.12845 | Narcolepsy with cataplexy                                        | rs198811   |
| 6   | 26.15748 | Height                                                           | rs4141885  |
| 6   | 26.20068 | Height                                                           | rs806794   |
| 6   | 26.23339 | Height                                                           | rs10946808 |
| 6   | 26.26007 | Plasma omega–6 polyunsaturated fatty acid levels (linoleic acid) | rs4476815  |
| 6   | 26.27255 | Schizophrenia                                                    | rs61747867 |
| 6   | 26.27665 | Educational attainment                                           | rs9393692  |
| 6   | 26.32589 | Educational attainment (years of education)                      | rs2179152  |

## GWAS Catalog SNPs in Region

| <b>chr</b> | <b>pos (Mb)</b> | <b>trait</b>           | <b>snp</b> |
|------------|-----------------|------------------------|------------|
| 6          | 26.40989        | Schizophrenia          | rs41266839 |
| 6          | 26.50056        | Iron status biomarkers | rs13194984 |
| 6          | 26.51056        | Educational attainment | rs1056667  |

# TBSS\_MO\_Pontine\_crossing\_tract

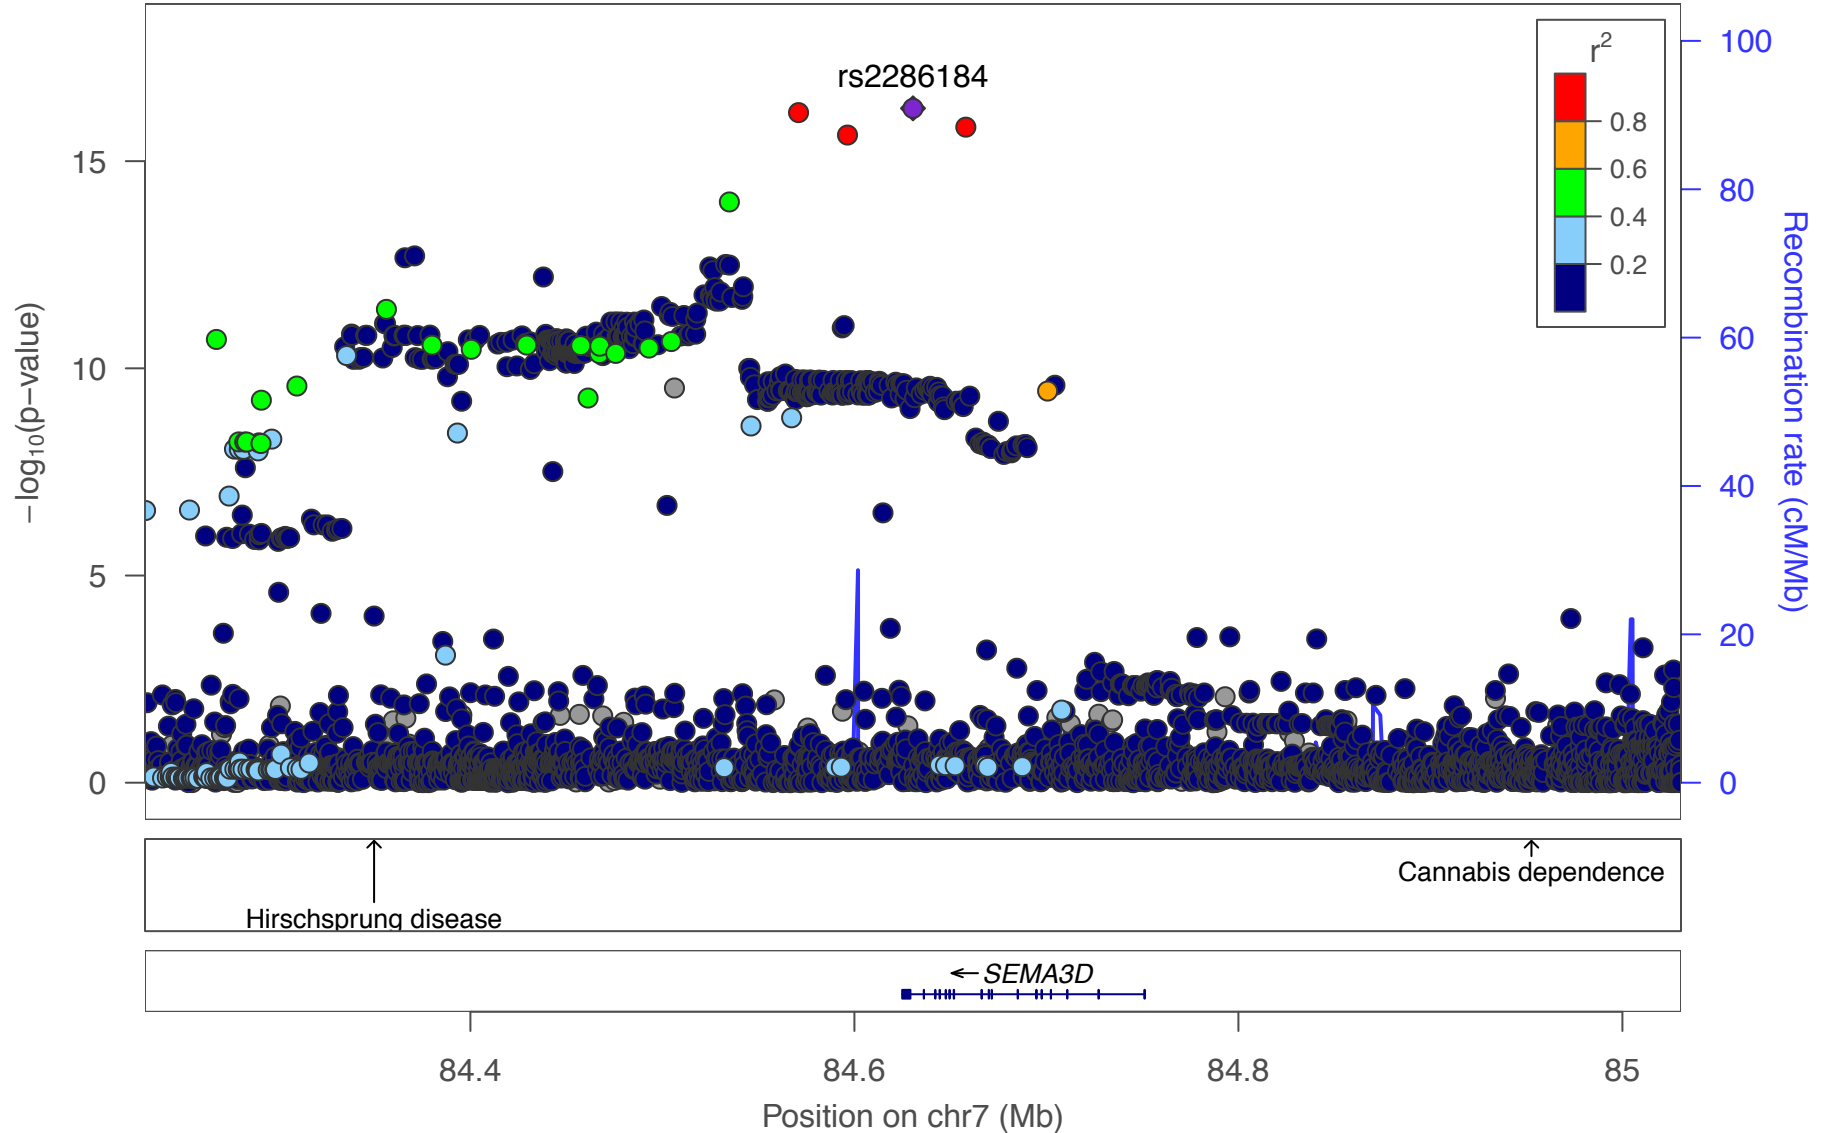

date: Thu Aug 17 18:06:12 2017

build: hg19

display range: chr7:84230516–85030516 [84230516–85030516]

hilite range: 0 – 0 [ 0 – 0 ]

reference SNP: chr7:84630516

number of SNPs plotted: 3260

min P.value: 5.31E–17 [chr7:84630516]

max P.value: 10E–1 [chr7:84419665]

## GWAS Catalog SNPs in Region

| <b>chr</b> | <b>pos (Mb)</b> | <b>trait</b>         | <b>snp</b> |
|------------|-----------------|----------------------|------------|
| 7          | 84.34984        | Hirschsprung disease | rs80227144 |
| 7          | 84.95263        | Cannabis dependence  | rs12534830 |

# TBSS\_OD\_Genu\_of\_corpus\_callosum

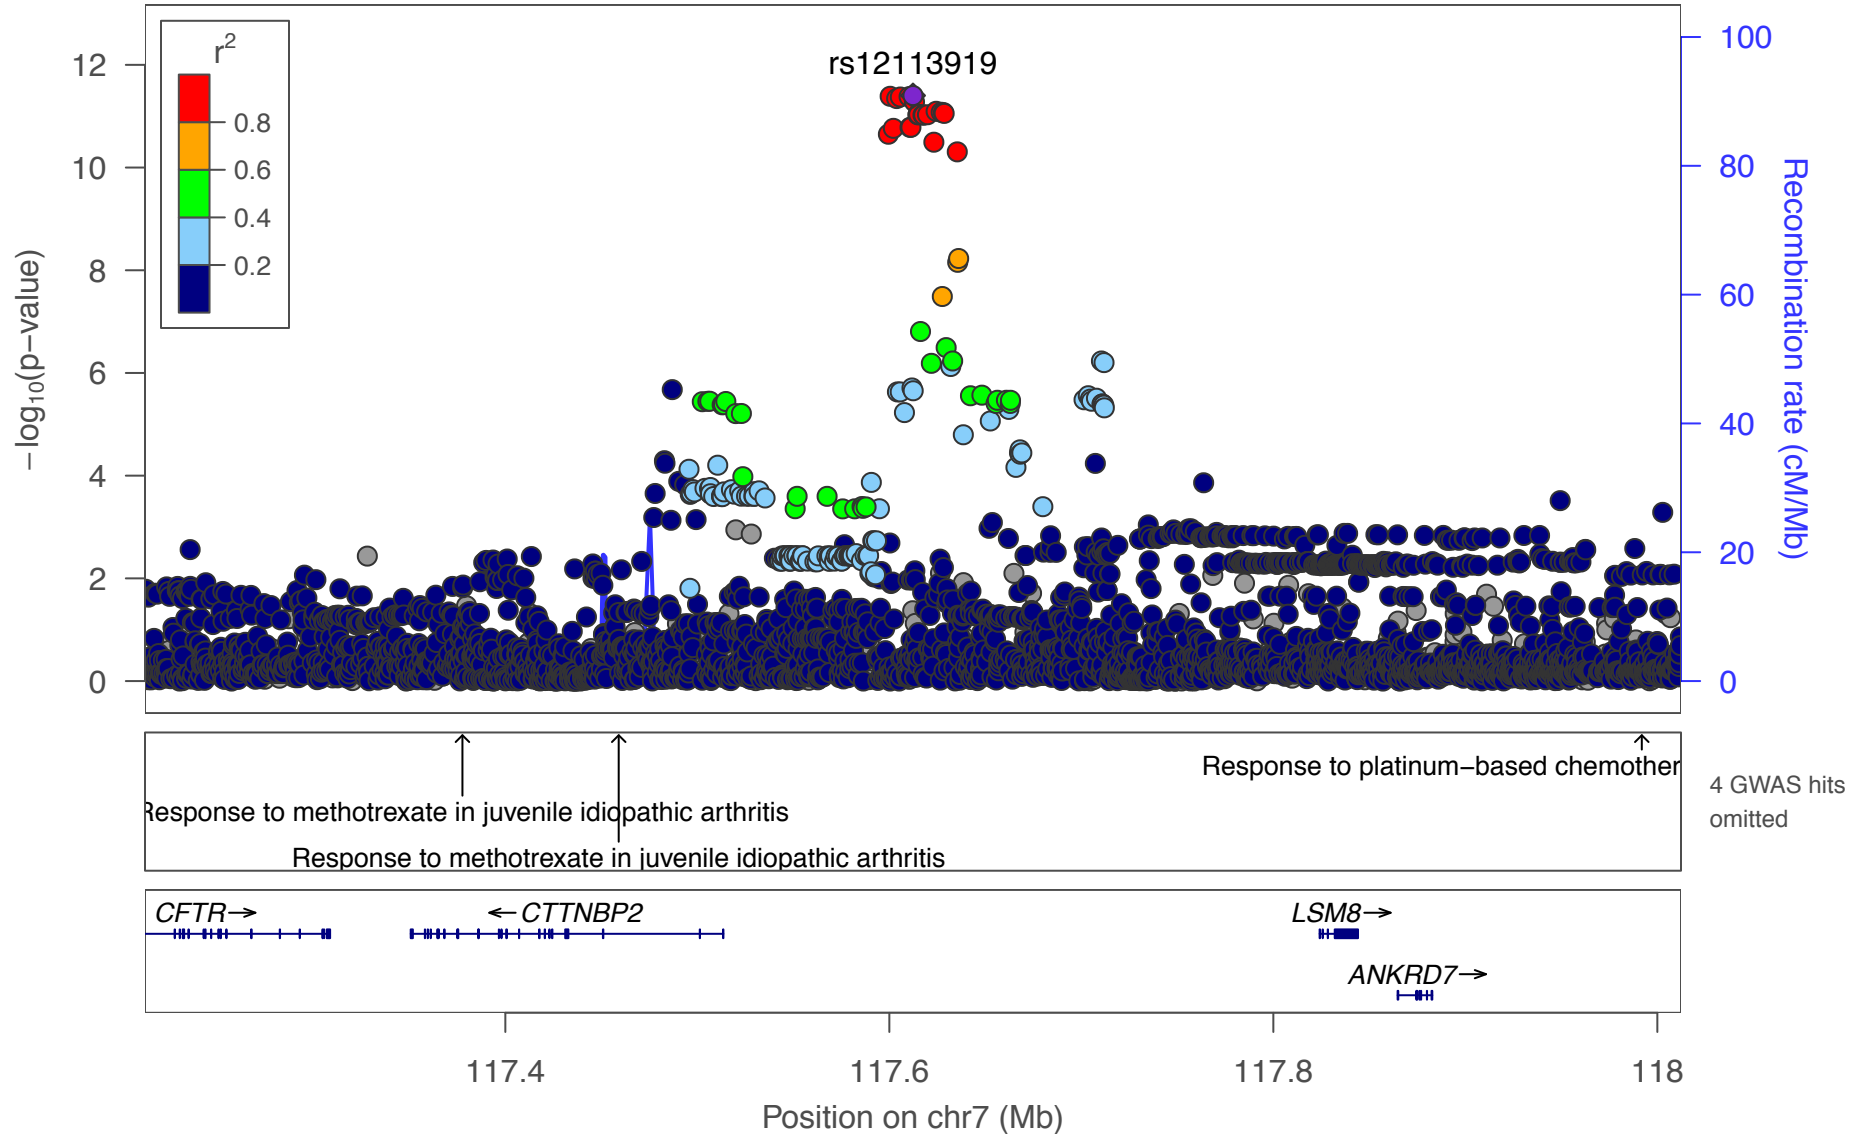

date: Thu Aug 17 18:07:04 2017

build: hg19

display range: chr7:117212315–118012315 [117212315–118012315]

hilite range: 0 – 0 [ 0 – 0 ]

reference SNP: chr7:117612315

number of SNPs plotted: 3195

min P.value: 3.96E–12 [chr7:117612315]

max P.value: 10E–1 [chr7:117436438]

omitted GWAS Hits: NA, NA

omitted GWAS Hits: NA



## GWAS Catalog SNPs in Region

| <b>chr</b> | <b>pos (Mb)</b> | <b>trait</b>                                                          | <b>snp</b> |
|------------|-----------------|-----------------------------------------------------------------------|------------|
| 7          | 117.2567        | Barrett's esophagus or Esophageal adenocarcinoma                      | rs17451754 |
| 7          | 117.3776        | Response to methotrexate in juvenile idiopathic arthritis             | rs757278   |
| 7          | 117.4590        | Response to methotrexate in juvenile idiopathic arthritis             | rs7800668  |
| 7          | 117.5237        | Depression                                                            | rs10233018 |
| 7          | 117.5296        | Neuroticism                                                           | rs10244364 |
| 7          | 117.6748        | Parental longevity (mother's age at death)                            | rs76108901 |
| 7          | 117.9919        | Response to platinum-based chemotherapy in non-small-cell lung cancer | rs41997    |

# volume\_BrainSegVol-to-eTIV

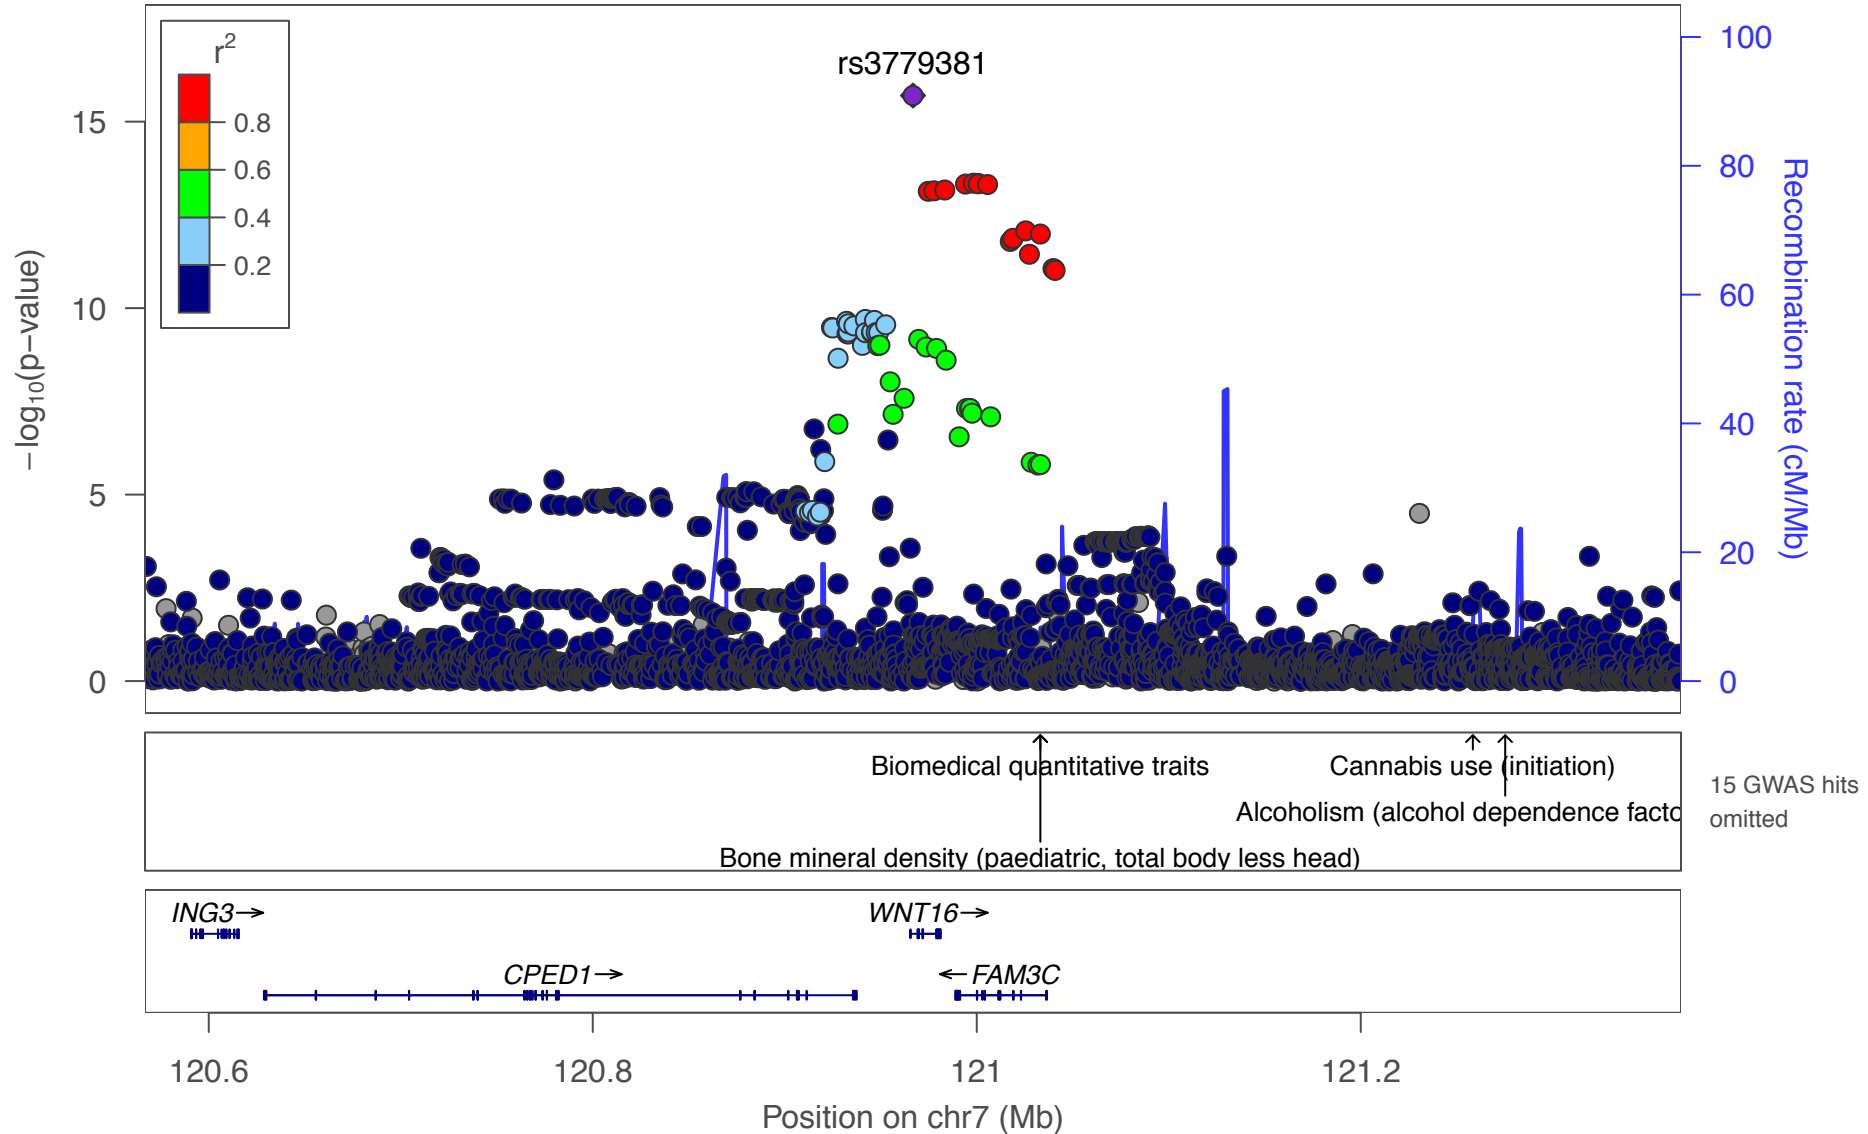

date: Thu Aug 17 18:34:43 2017

build: hg19

display range: chr7:120566790–121366790 [120566790–121366790]

hilite range: 0 – 0 [ 0 – 0 ]

reference SNP: chr7:120966790

number of SNPs plotted: 3489

min P.value:  $2E-16$  [chr7:120966790]

max P.value:  $10E-1$  [chr7:121323676]

omitted GWAS Hits: chr7:121.258371–Cannabis use (initiation), NA

omitted GWAS Hits: NA, NA

## GWAS Catalog SNPs in Region

| <b>chr</b> | <b>pos (Mb)</b> | <b>trait</b>                                            | <b>snp</b> |
|------------|-----------------|---------------------------------------------------------|------------|
| 7          | 120.7473        | Bone mineral density (paediatric, skull)                | rs13223036 |
| 7          | 120.7589        | Bone mineral density (paediatric, upper limb)           | rs798943   |
| 7          | 120.7851        | Bone mineral density                                    | rs13245690 |
| 7          | 120.8435        | Pediatric areal bone mineral density (radius)           | rs7797976  |
| 7          | 120.8435        | Pediatric bone mineral content (radius)                 | rs7797976  |
| 7          | 120.9038        | Bone mineral density                                    | rs4609139  |
| 7          | 120.9622        | Bone properties (heel)                                  | rs2908007  |
| 7          | 120.9698        | Bone mineral density (paediatric, lower limb)           | rs2908004  |
| 7          | 120.9698        | Bone mineral density                                    | rs2908004  |
| 7          | 120.9748        | Bone mineral density                                    | rs3801387  |
| 7          | 120.9791        | Cortical thickness                                      | rs2707466  |
| 7          | 120.9833        | Bone mineral density                                    | rs10242100 |
| 7          | 121.0186        | Bone mineral density                                    | rs917727   |
| 7          | 121.0331        | Biomedical quantitative traits                          | rs7776725  |
| 7          | 121.0331        | Bone mineral density (paediatric, total body less head) | rs7776725  |
| 7          | 121.0331        | Bone mineral density (total hip)                        | rs7776725  |
| 7          | 121.0331        | Bone mineral density (femoral neck)                     | rs7776725  |
| 7          | 121.2584        | Cannabis use (initiation)                               | rs28581422 |
| 7          | 121.2752        | Alcoholism (alcohol dependence factor score)            | rs10253361 |

# volume\_MaskVol

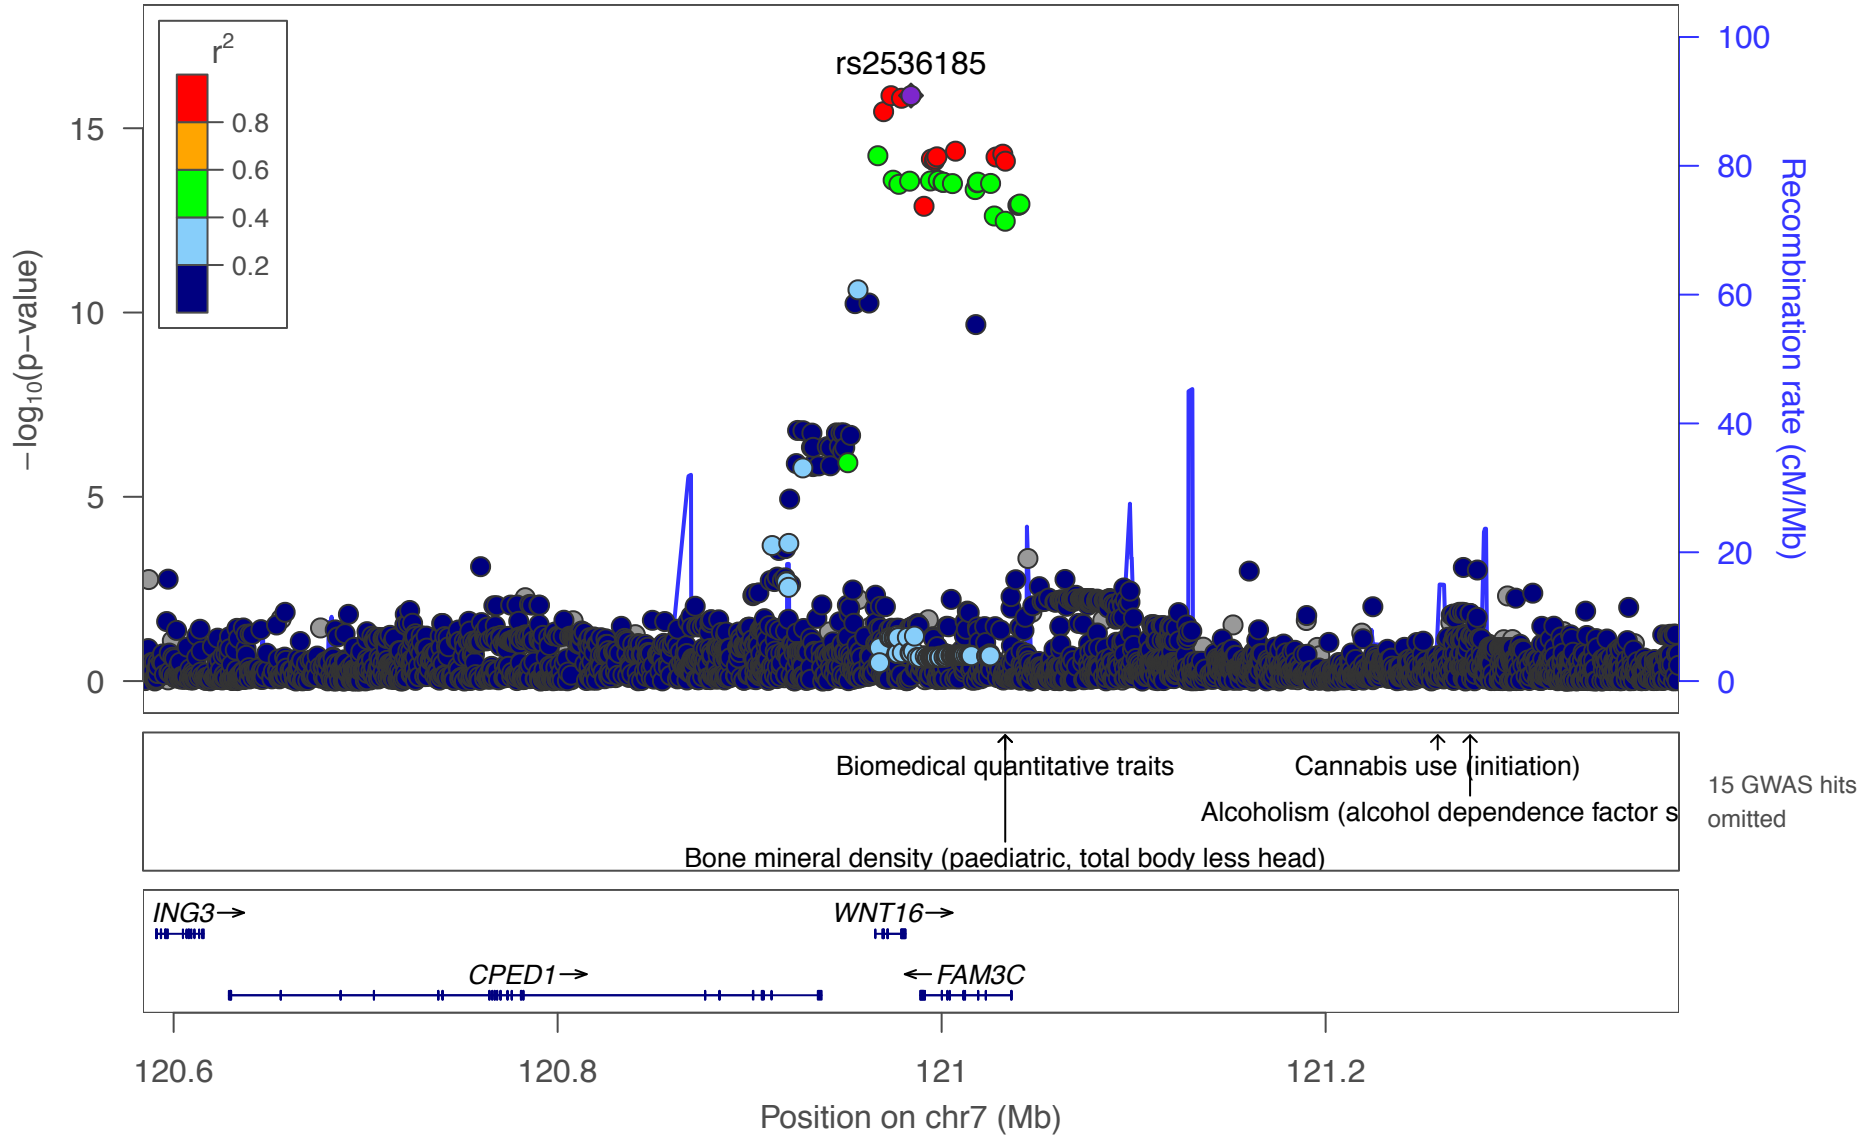

date: Thu Aug 17 18:35:37 2017

build: hg19

display range: chr7:120584041–121384041 [120584041–121384041]

hilite range: 0 – 0 [ 0 – 0 ]

reference SNP: chr7:120984041

number of SNPs plotted: 3498

min P.value: 1.3E–16 [chr7:120984041]

max P.value: 10E–1 [chr7:120938077]

omitted GWAS Hits: chr7:121.258371–Cannabis use (initiation), NA

omitted GWAS Hits: NA, NA

## GWAS Catalog SNPs in Region

| <b>chr</b> | <b>pos (Mb)</b> | <b>trait</b>                                            | <b>snp</b> |
|------------|-----------------|---------------------------------------------------------|------------|
| 7          | 120.7473        | Bone mineral density (paediatric, skull)                | rs13223036 |
| 7          | 120.7589        | Bone mineral density (paediatric, upper limb)           | rs798943   |
| 7          | 120.7851        | Bone mineral density                                    | rs13245690 |
| 7          | 120.8435        | Pediatric areal bone mineral density (radius)           | rs7797976  |
| 7          | 120.8435        | Pediatric bone mineral content (radius)                 | rs7797976  |
| 7          | 120.9038        | Bone mineral density                                    | rs4609139  |
| 7          | 120.9622        | Bone properties (heel)                                  | rs2908007  |
| 7          | 120.9698        | Bone mineral density (paediatric, lower limb)           | rs2908004  |
| 7          | 120.9698        | Bone mineral density                                    | rs2908004  |
| 7          | 120.9748        | Bone mineral density                                    | rs3801387  |
| 7          | 120.9791        | Cortical thickness                                      | rs2707466  |
| 7          | 120.9833        | Bone mineral density                                    | rs10242100 |
| 7          | 121.0186        | Bone mineral density                                    | rs917727   |
| 7          | 121.0331        | Biomedical quantitative traits                          | rs7776725  |
| 7          | 121.0331        | Bone mineral density (paediatric, total body less head) | rs7776725  |
| 7          | 121.0331        | Bone mineral density (total hip)                        | rs7776725  |
| 7          | 121.0331        | Bone mineral density (femoral neck)                     | rs7776725  |
| 7          | 121.2584        | Cannabis use (initiation)                               | rs28581422 |
| 7          | 121.2752        | Alcoholism (alcohol dependence factor score)            | rs10253361 |

# SWI\_T2star\_right\_putamen

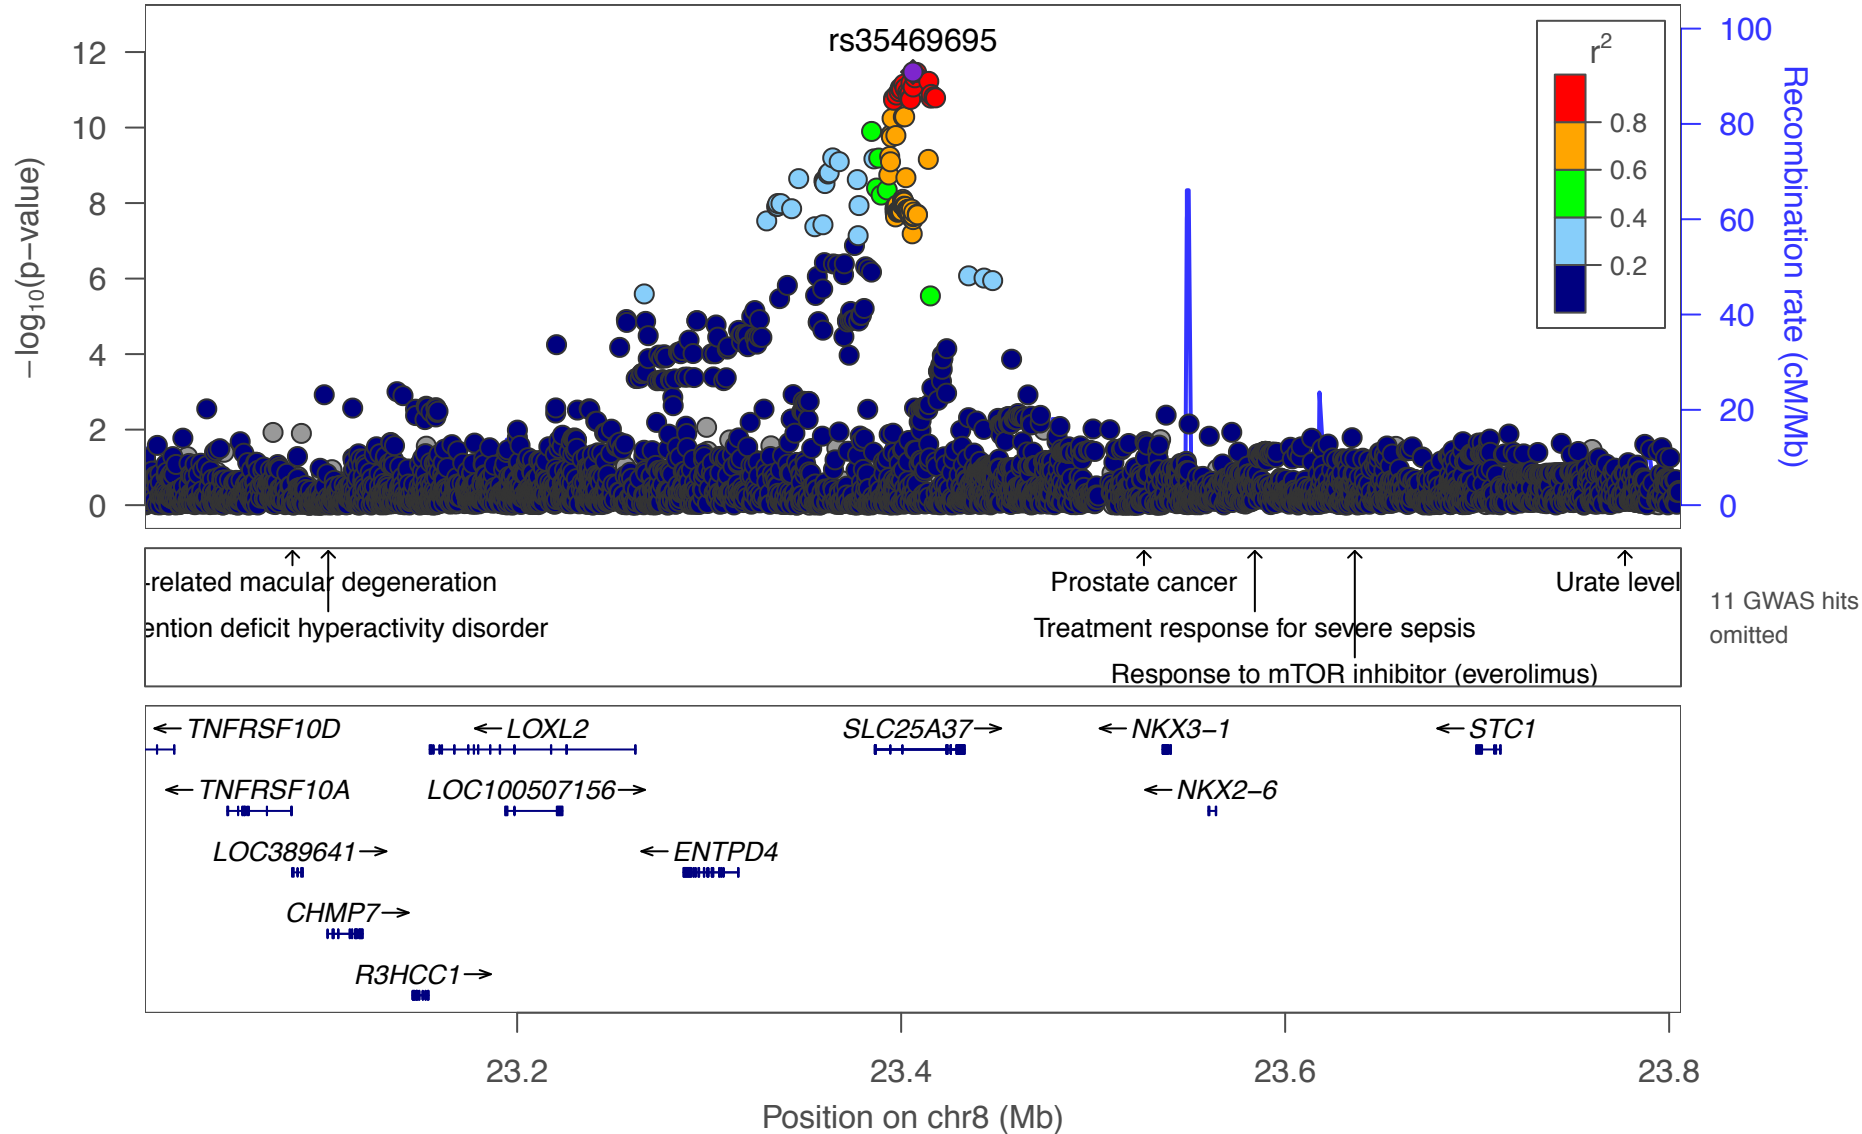



date: Thu Aug 17 18:20:59 2017

build: hg19

display range: chr8:23006169–23806169 [23006169–23806169]

hilite range: 0 – 0 [ 0 – 0 ]

reference SNP: chr8:23406169

number of SNPs plotted: 4695

min P.value: 3.37E–12 [chr8:23406169]

max P.value: 10E–1 [chr8:23352178]

omitted GWAS Hits: chr8:23.777006–Urate levels, NA

omitted GWAS Hits: NA, NA

omitted GWAS Hits: NA, NA

omitted GWAS Hits: NA, NA

GWAS Catalog SNPs in Region

| chr | pos (Mb) | trait                                                    | snp         |
|-----|----------|----------------------------------------------------------|-------------|
| 8   | 23.08297 | Age-related macular degeneration                         | rs13278062  |
| 8   | 23.08297 | Advanced age-related macular degeneration                | rs79037040  |
| 8   | 23.10162 | Attention deficit hyperactivity disorder                 | rs7463256   |
| 8   | 23.50726 | Prostate cancer                                          | rs142463603 |
| 8   | 23.50738 | Post bronchodilator FEV1/FVC ratio in COPD               | rs147410223 |
| 8   | 23.50738 | Post bronchodilator FEV1/FVC ratio                       | rs147410223 |
| 8   | 23.52646 | Prostate cancer                                          | rs1512268   |
| 8   | 23.53402 | Prostate cancer                                          | rs10503733  |
| 8   | 23.58423 | Treatment response for severe sepsis                     | rs13273073  |
| 8   | 23.60332 | Waist-to-hip ratio adjusted for body mass index          | rs7830933   |
| 8   | 23.63628 | Response to mTOR inhibitor (everolimus)                  | rs218869    |
| 8   | 23.64349 | Preschool internalizing problems                         | rs310272    |
| 8   | 23.71499 | Glomerular filtration rate (creatinine)                  | rs3758086   |
| 8   | 23.75115 | Glomerular filtration rate in non diabetics (creatinine) | rs10109414  |
| 8   | 23.75115 | Chronic kidney disease                                   | rs10109414  |
| 8   | 23.75115 | Glomerular filtration rate                               | rs10109414  |
| 8   | 23.77701 | Urate levels                                             | rs17786744  |

# SWI\_T2star\_left\_putamen\_plus\_right\_putamen

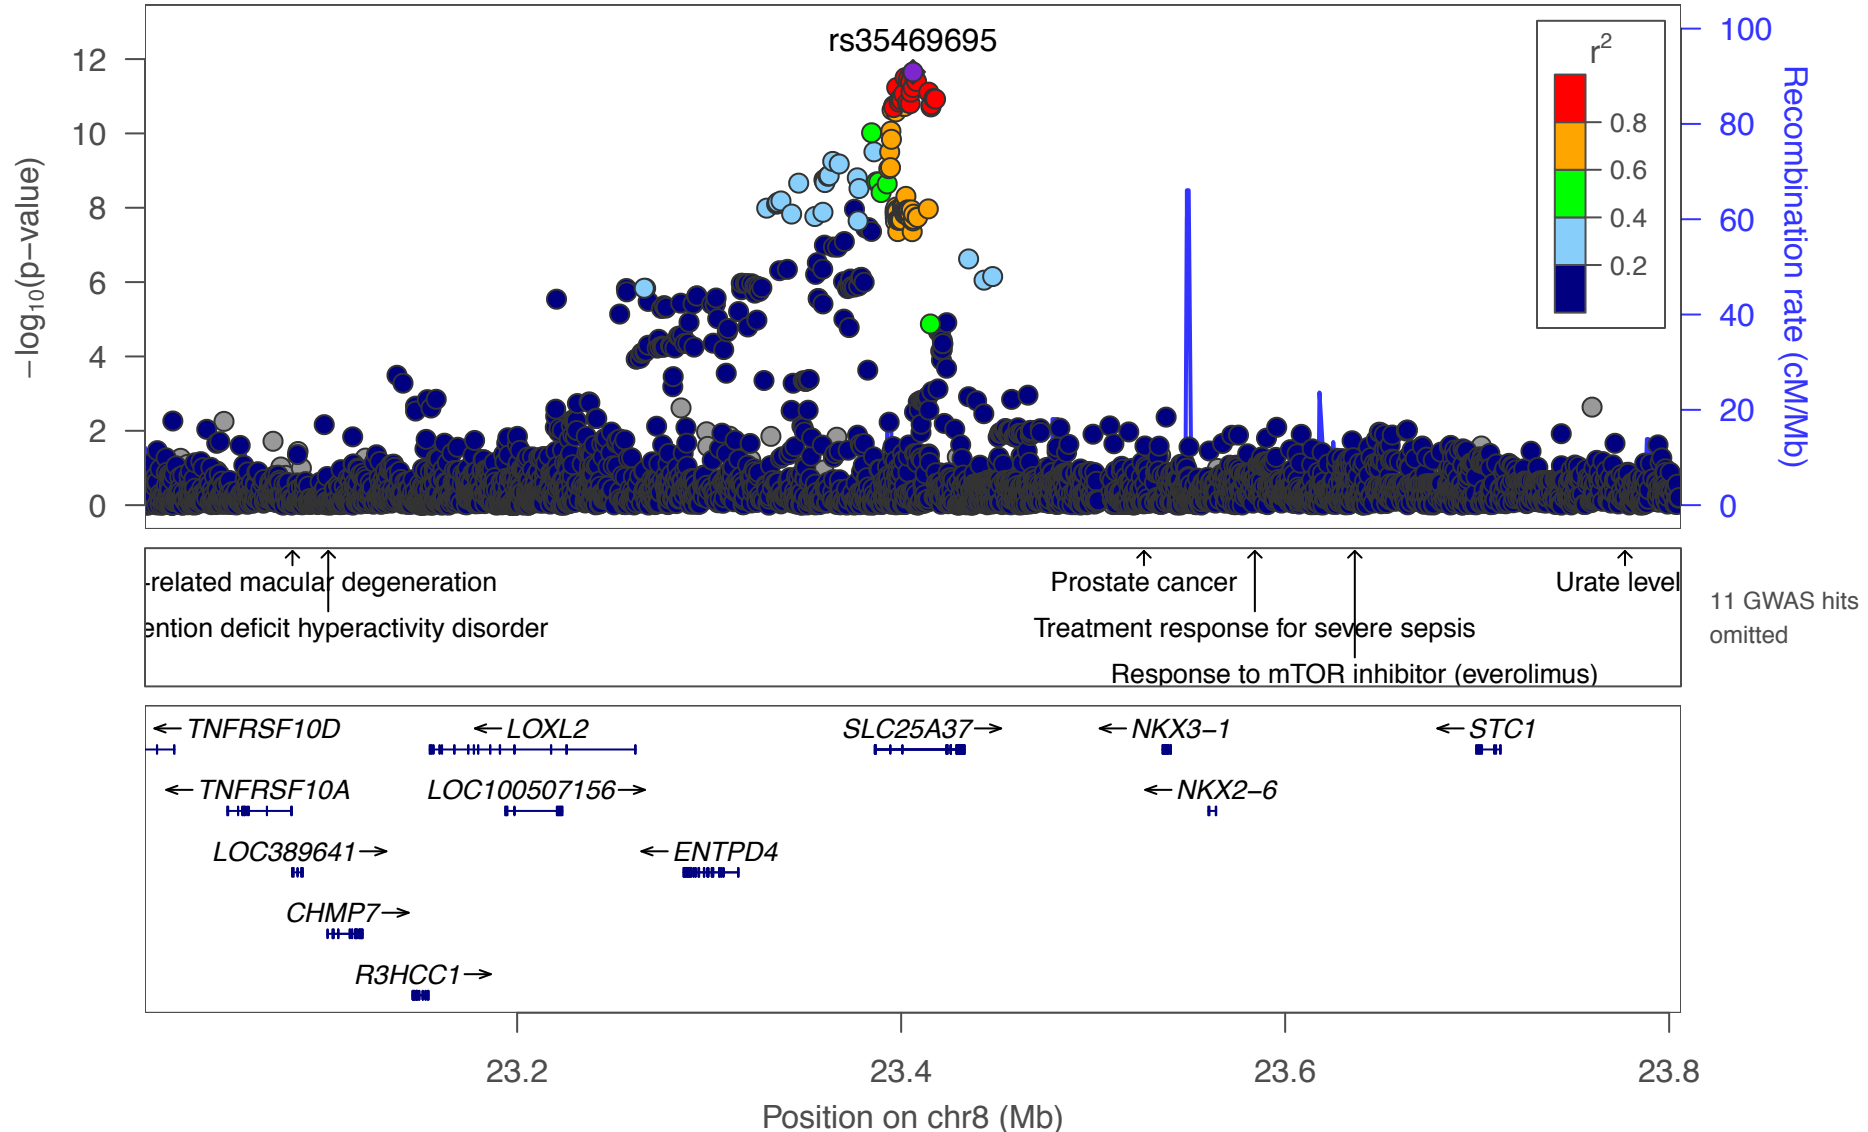

date: Thu Aug 17 18:21:00 2017

build: hg19

display range: chr8:23006169–23806169 [23006169–23806169]

hilite range: 0 – 0 [ 0 – 0 ]

reference SNP: chr8:23406169

number of SNPs plotted: 4695

min P.value: 2.22E–12 [chr8:23406169]

max P.value: 10E–1 [chr8:23155376]

omitted GWAS Hits: chr8:23.777006–Urate levels, NA

omitted GWAS Hits: NA, NA

omitted GWAS Hits: NA, NA

omitted GWAS Hits: NA, NA

GWAS Catalog SNPs in Region

| chr | pos (Mb) | trait                                                    | snp         |
|-----|----------|----------------------------------------------------------|-------------|
| 8   | 23.08297 | Age-related macular degeneration                         | rs13278062  |
| 8   | 23.08297 | Advanced age-related macular degeneration                | rs79037040  |
| 8   | 23.10162 | Attention deficit hyperactivity disorder                 | rs7463256   |
| 8   | 23.50726 | Prostate cancer                                          | rs142463603 |
| 8   | 23.50738 | Post bronchodilator FEV1/FVC ratio in COPD               | rs147410223 |
| 8   | 23.50738 | Post bronchodilator FEV1/FVC ratio                       | rs147410223 |
| 8   | 23.52646 | Prostate cancer                                          | rs1512268   |
| 8   | 23.53402 | Prostate cancer                                          | rs10503733  |
| 8   | 23.58423 | Treatment response for severe sepsis                     | rs13273073  |
| 8   | 23.60332 | Waist-to-hip ratio adjusted for body mass index          | rs7830933   |
| 8   | 23.63628 | Response to mTOR inhibitor (everolimus)                  | rs218869    |
| 8   | 23.64349 | Preschool internalizing problems                         | rs310272    |
| 8   | 23.71499 | Glomerular filtration rate (creatinine)                  | rs3758086   |
| 8   | 23.75115 | Glomerular filtration rate in non diabetics (creatinine) | rs10109414  |
| 8   | 23.75115 | Chronic kidney disease                                   | rs10109414  |
| 8   | 23.75115 | Glomerular filtration rate                               | rs10109414  |
| 8   | 23.77701 | Urate levels                                             | rs17786744  |

# FIRST\_left\_pallidum\_volume

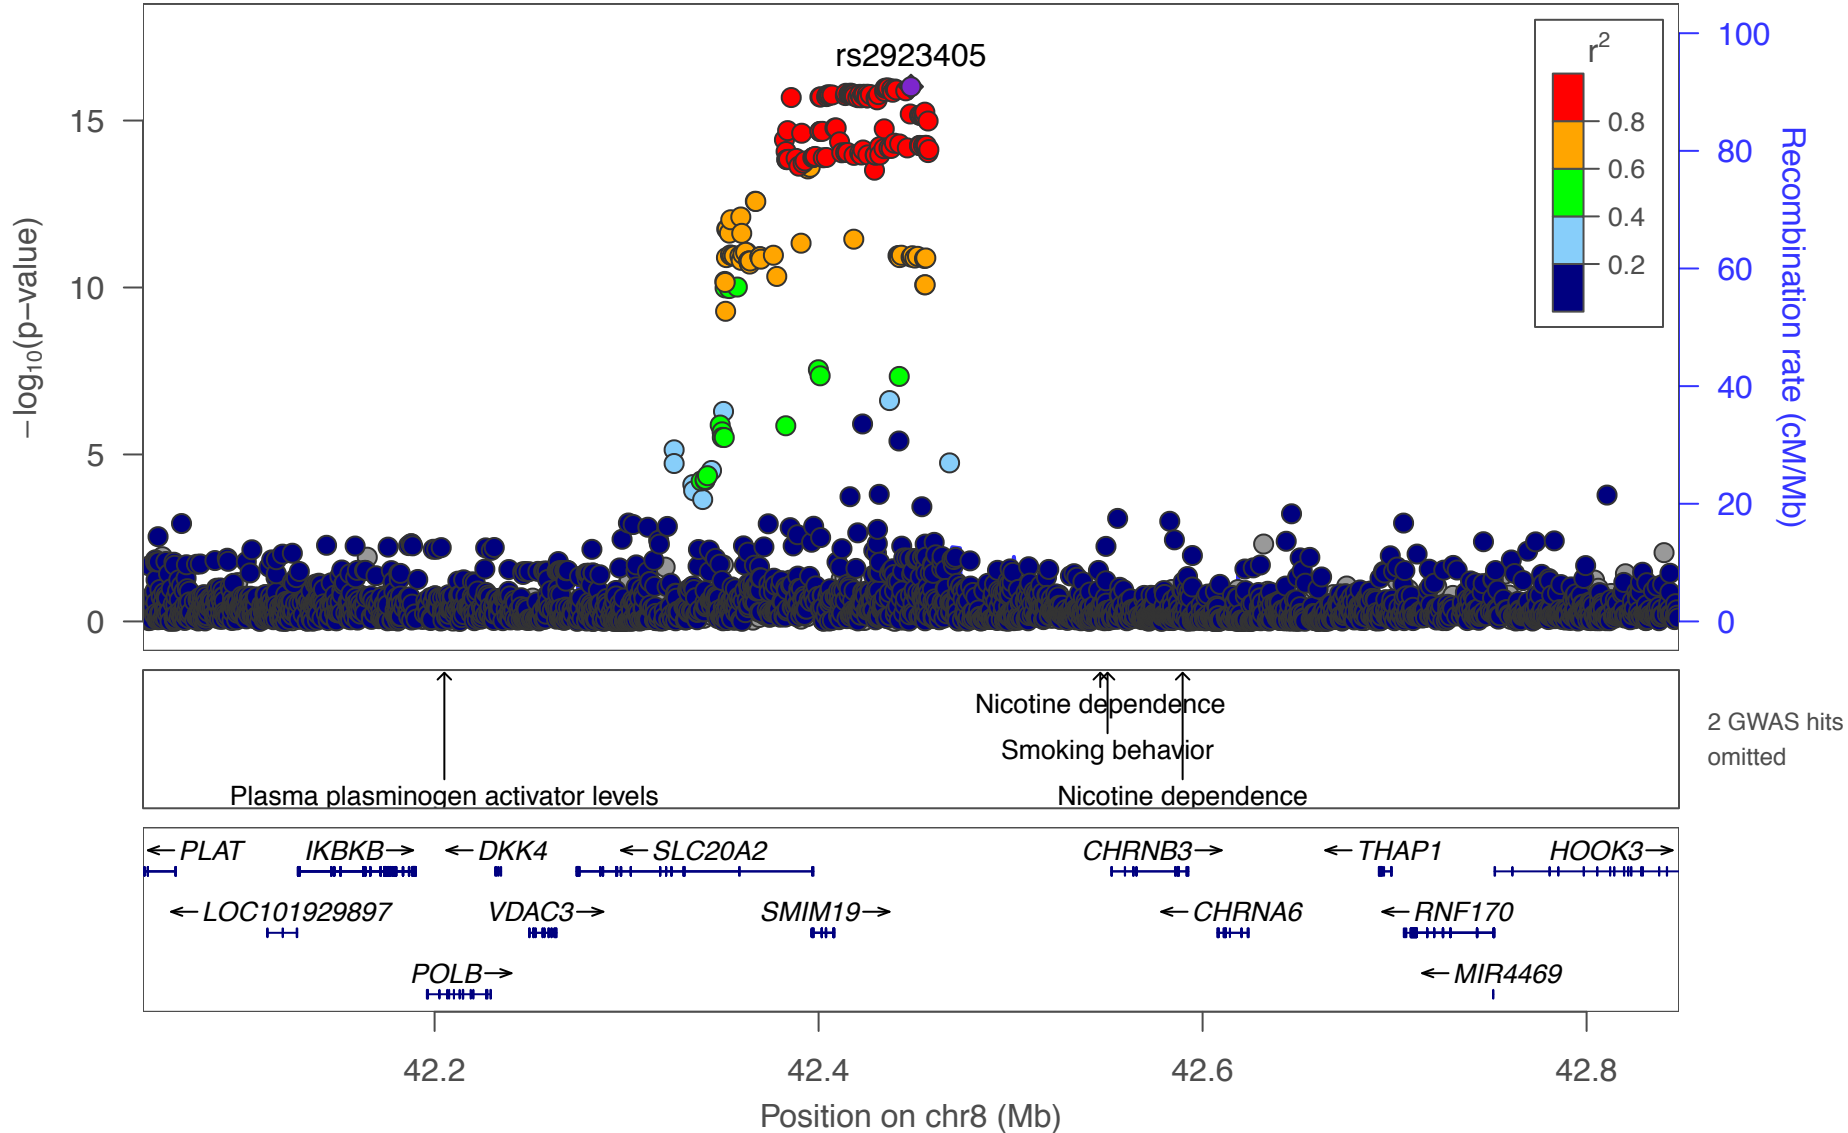

date: Thu Aug 17 18:35:28 2017

build: hg19

display range: chr8:42048126–42848126 [42048126–42848126]

hilite range: 0 – 0 [ 0 – 0 ]

reference SNP: chr8:42448126

number of SNPs plotted: 3233

min P.value: 9.68E–17 [chr8:42448126]

max P.value: 9.99E–1 [chr8:42213126]

omitted GWAS Hits: NA, NA

## GWAS Catalog SNPs in Region

| <b>chr</b> | <b>pos (Mb)</b> | <b>trait</b>                            | <b>snp</b> |
|------------|-----------------|-----------------------------------------|------------|
| 8          | 42.20508        | Plasma plasminogen activator levels     | rs3136739  |
| 8          | 42.47227        | Gut microbiota (functional units)       | rs7016086  |
| 8          | 42.54671        | Nicotine dependence                     | rs1451240  |
| 8          | 42.55050        | Smoking behavior                        | rs6474412  |
| 8          | 42.58960        | Nicotine dependence                     | rs55828312 |
| 8          | 42.65818        | Pelvic organ prolapse (moderate/severe) | rs9772809  |



# FIRST\_right\_pallidum\_volume

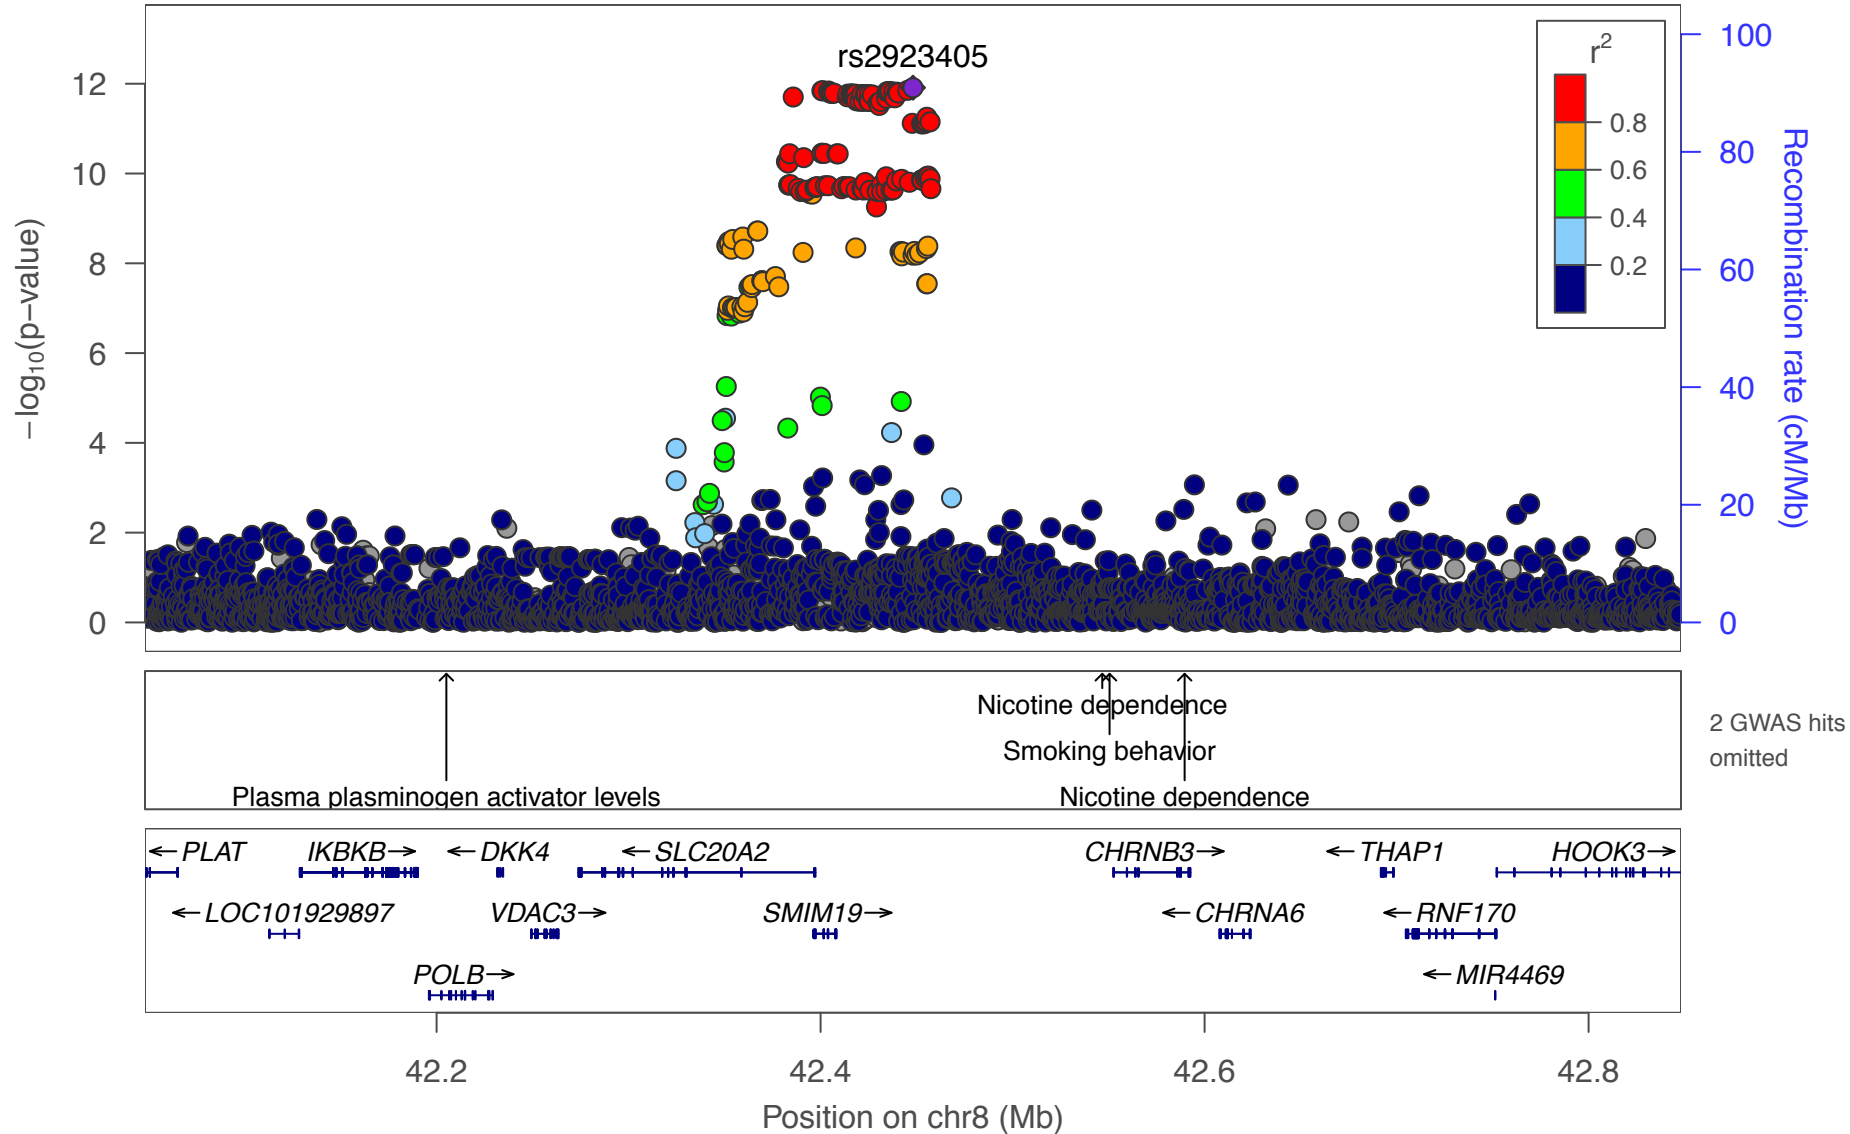

date: Thu Aug 17 18:35:27 2017

build: hg19

display range: chr8:42048126–42848126 [42048126–42848126]

hilite range: 0 – 0 [ 0 – 0 ]

reference SNP: chr8:42448126

number of SNPs plotted: 3233

min P.value: 1.22E–12 [chr8:42448126]

max P.value: 10E–1 [chr8:42443310]

omitted GWAS Hits: NA, NA

## GWAS Catalog SNPs in Region

| <b>chr</b> | <b>pos (Mb)</b> | <b>trait</b>                            | <b>snp</b> |
|------------|-----------------|-----------------------------------------|------------|
| 8          | 42.20508        | Plasma plasminogen activator levels     | rs3136739  |
| 8          | 42.47227        | Gut microbiota (functional units)       | rs7016086  |
| 8          | 42.54671        | Nicotine dependence                     | rs1451240  |
| 8          | 42.55050        | Smoking behavior                        | rs6474412  |
| 8          | 42.58960        | Nicotine dependence                     | rs55828312 |
| 8          | 42.65818        | Pelvic organ prolapse (moderate/severe) | rs9772809  |

# FIRST\_left\_pallidum\_volume\_plus\_FIRST\_right\_pallidum\_volume

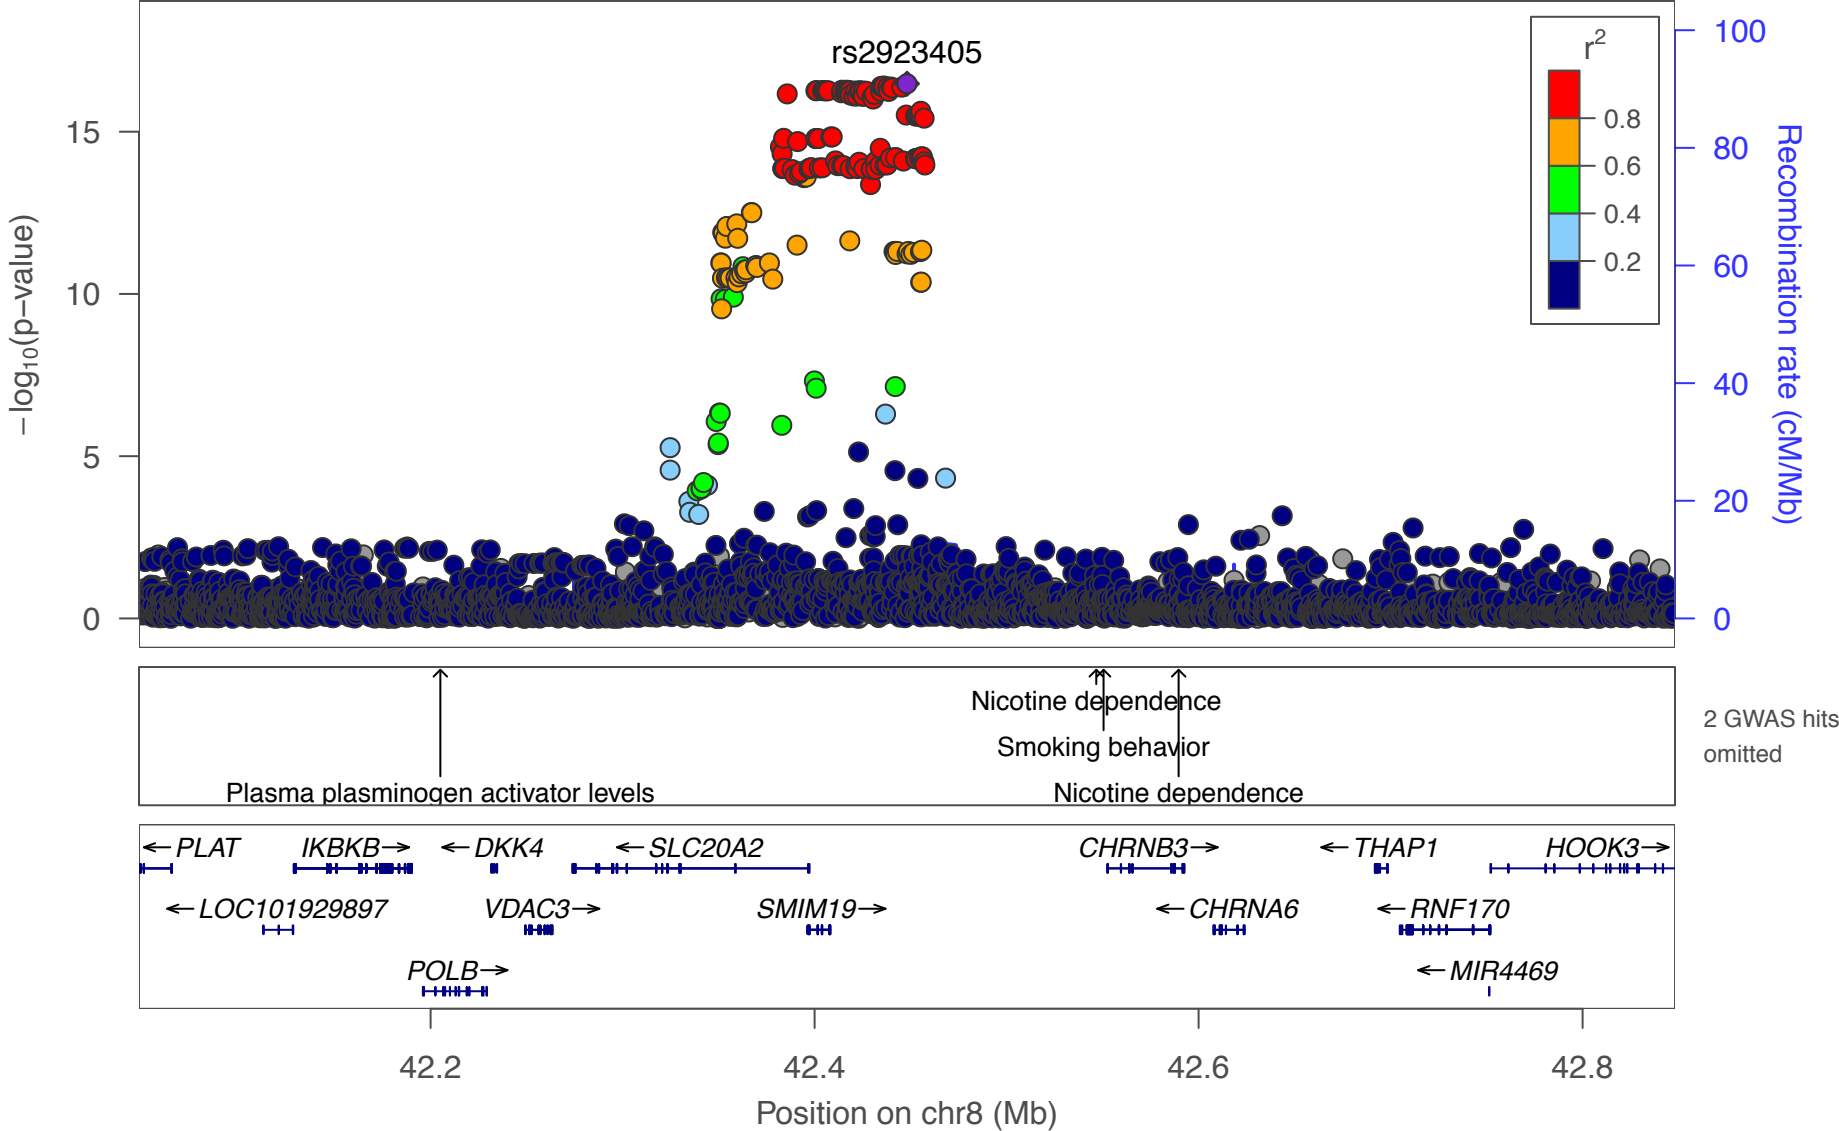

date: Thu Aug 17 18:16:48 2017

build: hg19

display range: chr8:42048126–42848126 [42048126–42848126]

hilite range: 0 – 0 [ 0 – 0 ]

reference SNP: chr8:42448126

number of SNPs plotted: 3233

min P.value: 3.31E–17 [chr8:42448126]

max P.value: 10E–1 [chr8:42771878]

omitted GWAS Hits: NA, NA

## GWAS Catalog SNPs in Region

| <b>chr</b> | <b>pos (Mb)</b> | <b>trait</b>                            | <b>snp</b> |
|------------|-----------------|-----------------------------------------|------------|
| 8          | 42.20508        | Plasma plasminogen activator levels     | rs3136739  |
| 8          | 42.47227        | Gut microbiota (functional units)       | rs7016086  |
| 8          | 42.54671        | Nicotine dependence                     | rs1451240  |
| 8          | 42.55050        | Smoking behavior                        | rs6474412  |
| 8          | 42.58960        | Nicotine dependence                     | rs55828312 |
| 8          | 42.65818        | Pelvic organ prolapse (moderate/severe) | rs9772809  |

# SWI\_T2star\_left\_pallidum\_plus\_right\_pallidum

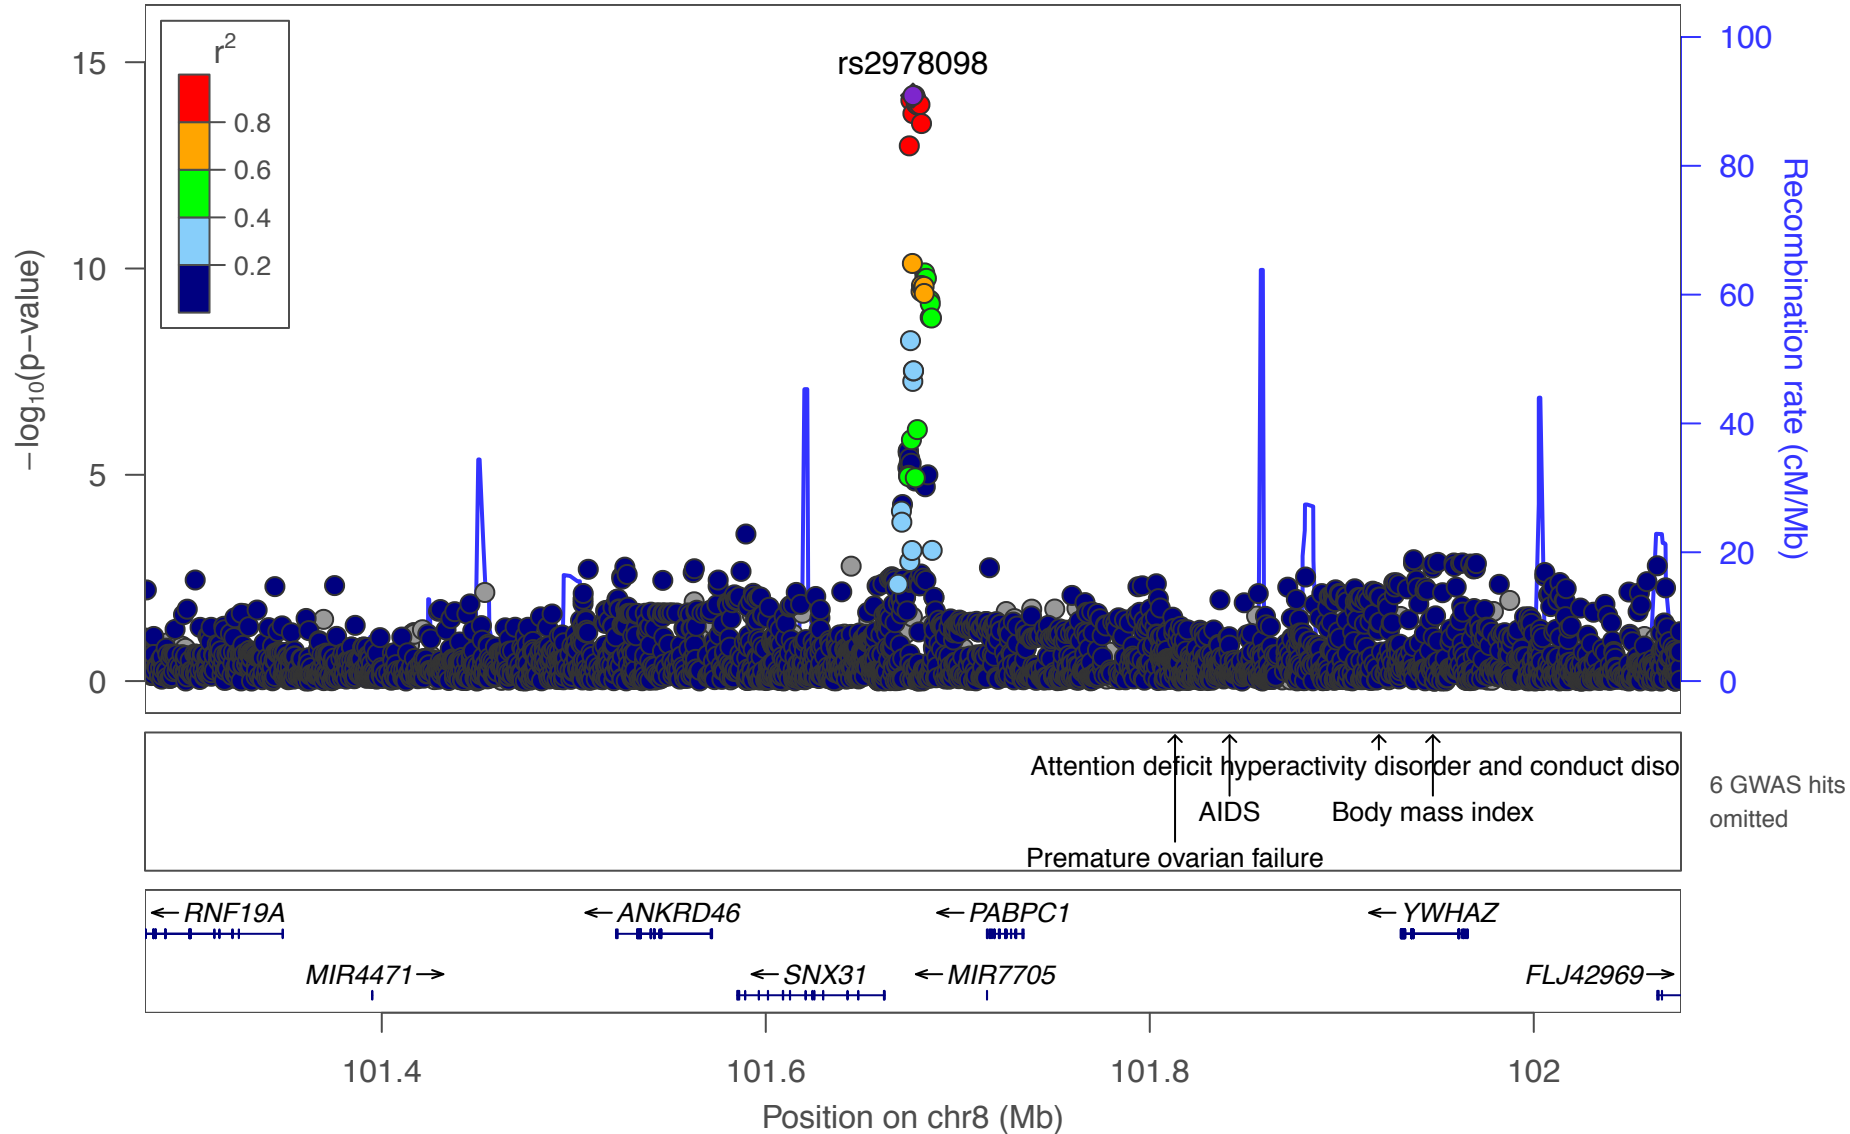

date: Thu Aug 17 18:38:36 2017

build: hg19

display range: chr8:101276675–102076675 [101276675–102076675]

hilite range: 0 – 0 [ 0 – 0 ]

reference SNP: chr8:101676675

number of SNPs plotted: 3823

min P.value: 6.43E–15 [chr8:101676675]

max P.value: 10E–1 [chr8:102066162]

omitted GWAS Hits: chr8:101.947453–Body mass index, NA

omitted GWAS Hits: NA, NA



## GWAS Catalog SNPs in Region

| <b>chr</b> | <b>pos (Mb)</b> | <b>trait</b>                                                  | <b>snp</b>  |
|------------|-----------------|---------------------------------------------------------------|-------------|
| 8          | 101.3302        | Atrioventricular conduction                                   | rs1371867   |
| 8          | 101.4318        | Asthma                                                        | rs7830057   |
| 8          | 101.5146        | Percentage gas trapping                                       | rs2844036   |
| 8          | 101.6828        | Cerebrospinal fluid clusterin levels                          | rs1693575   |
| 8          | 101.8072        | Alcohol consumption                                           | rs36061340  |
| 8          | 101.8132        | Premature ovarian failure                                     | rs3847153   |
| 8          | 101.8415        | AIDS                                                          | rs3108919   |
| 8          | 101.9193        | Attention deficit hyperactivity disorder and conduct disorder | rs931812    |
| 8          | 101.9475        | Body mass index                                               | rs3134353   |
| 8          | 102.0459        | Cognitive decline rate in late mild cognitive impairment      | rs116237496 |

# SWI\_T2star\_right\_pallidum

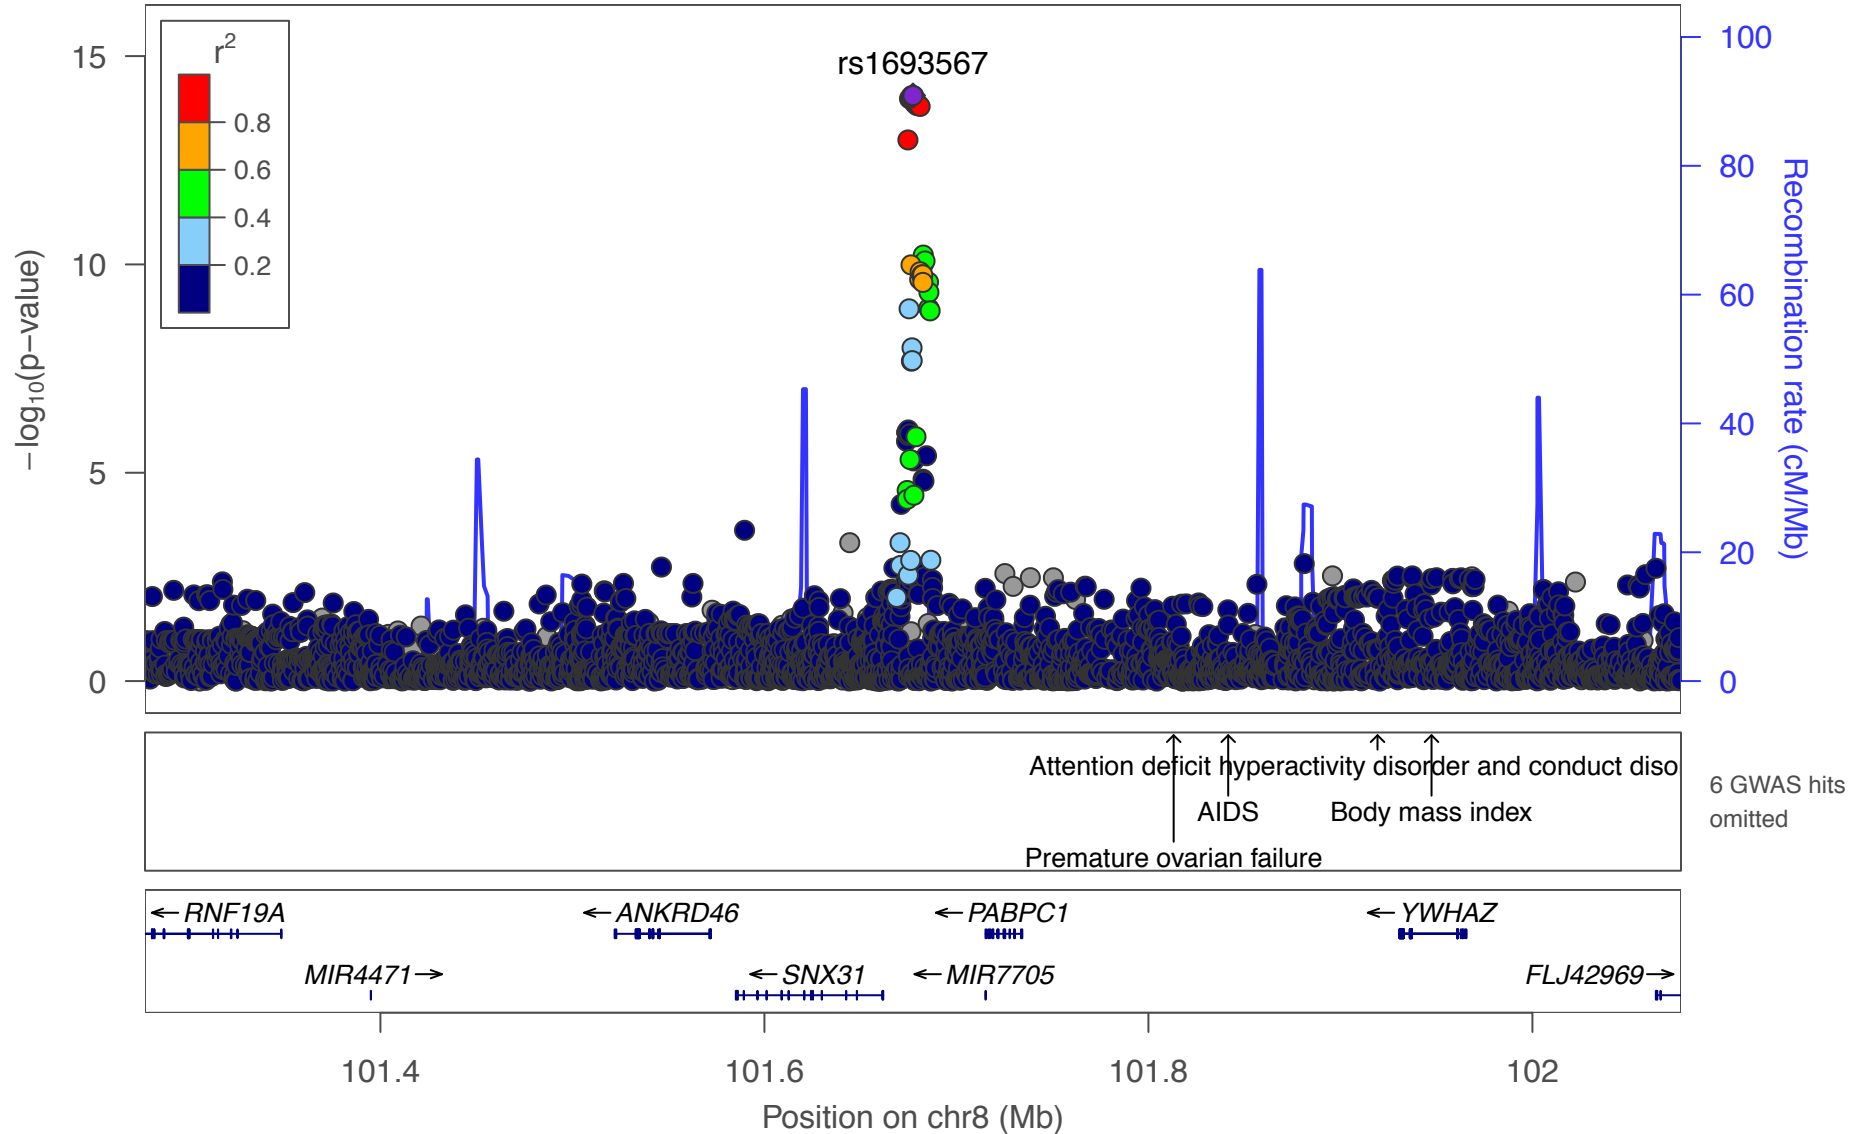

date: Thu Aug 17 18:38:36 2017

build: hg19

display range: chr8:101277386–102077386 [101277386–102077386]

hilite range: 0 – 0 [ 0 – 0 ]

reference SNP: chr8:101677386

number of SNPs plotted: 3822

min P.value: 8.85E–15 [chr8:101677386]

max P.value: 10E–1 [chr8:101343125]

omitted GWAS Hits: chr8:101.947453–Body mass index, NA

omitted GWAS Hits: NA, NA

## GWAS Catalog SNPs in Region

| <b>chr</b> | <b>pos (Mb)</b> | <b>trait</b>                                                  | <b>snp</b>  |
|------------|-----------------|---------------------------------------------------------------|-------------|
| 8          | 101.3302        | Atrioventricular conduction                                   | rs1371867   |
| 8          | 101.4318        | Asthma                                                        | rs7830057   |
| 8          | 101.5146        | Percentage gas trapping                                       | rs2844036   |
| 8          | 101.6828        | Cerebrospinal fluid clusterin levels                          | rs1693575   |
| 8          | 101.8072        | Alcohol consumption                                           | rs36061340  |
| 8          | 101.8132        | Premature ovarian failure                                     | rs3847153   |
| 8          | 101.8415        | AIDS                                                          | rs3108919   |
| 8          | 101.9193        | Attention deficit hyperactivity disorder and conduct disorder | rs931812    |
| 8          | 101.9475        | Body mass index                                               | rs3134353   |
| 8          | 102.0459        | Cognitive decline rate in late mild cognitive impairment      | rs116237496 |

# FAST\_ROIs\_L\_cerebellum\_crus\_I

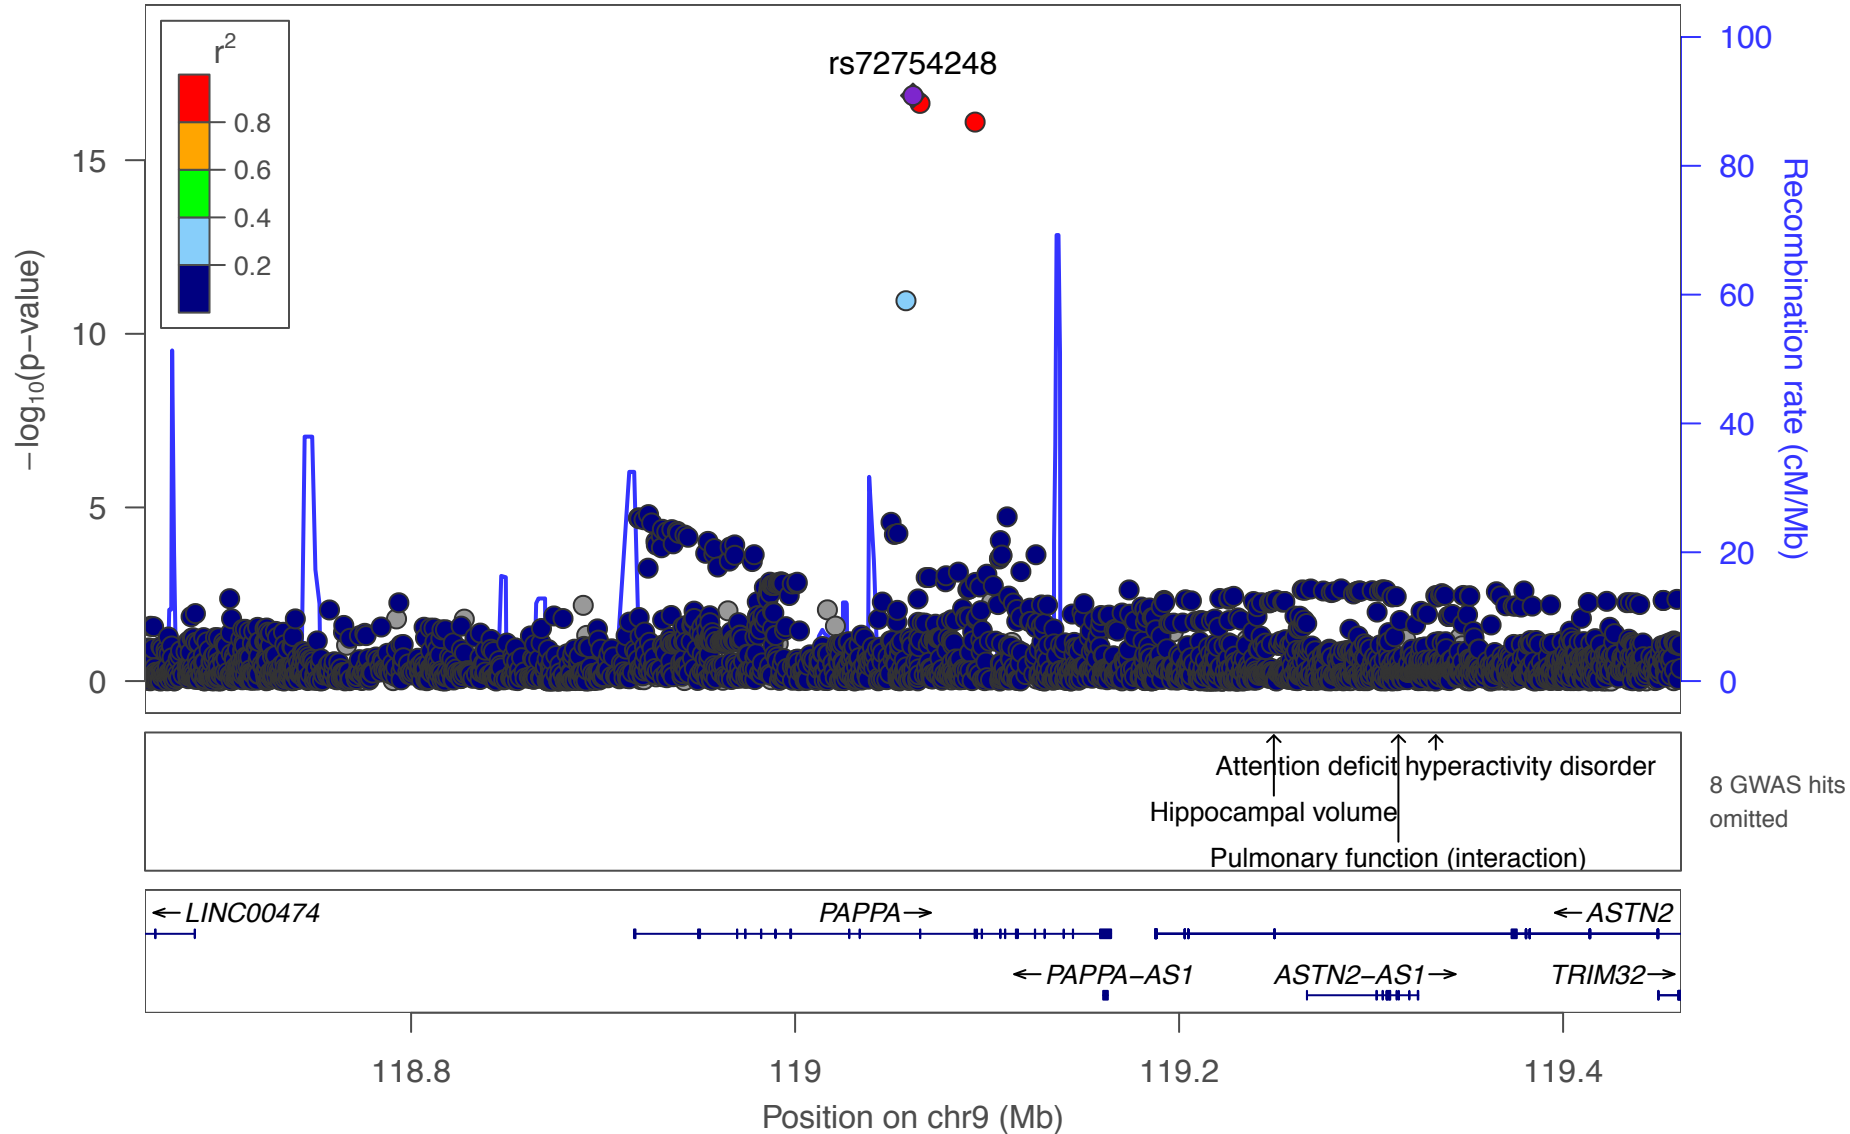

date: Thu Aug 17 18:28:35 2017

build: hg19

display range: chr9:118661396–119461396 [118661396–119461396]

hilite range: 0 – 0 [ 0 – 0 ]

reference SNP: chr9:119061396

number of SNPs plotted: 3336

min P.value: 1.38E–17 [chr9:119061396]

max P.value: 10E–1 [chr9:119129825]

omitted GWAS Hits: NA, NA

omitted GWAS Hits: NA, NA

omitted GWAS Hits: NA, NA

## GWAS Catalog SNPs in Region

| <b>chr</b> | <b>pos (Mb)</b> | <b>trait</b>                                      | <b>snp</b> |
|------------|-----------------|---------------------------------------------------|------------|
| 9          | 118.9567        | Conotruncal heart defects                         | rs436582   |
| 9          | 118.9650        | 3-hydroxypropylmercapturic acid levels in smokers | rs1003858  |
| 9          | 119.1223        | Height                                            | rs751543   |
| 9          | 119.1348        | Height                                            | rs7869550  |
| 9          | 119.1818        | Migraine                                          | rs17303101 |
| 9          | 119.2493        | Hippocampal volume                                | rs7852872  |
| 9          | 119.2526        | Migraine                                          | rs6478241  |
| 9          | 119.2526        | Migraine without aura                             | rs6478241  |
| 9          | 119.2526        | Migraine – clinic-based                           | rs6478241  |
| 9          | 119.3142        | Pulmonary function (interaction)                  | rs13290997 |
| 9          | 119.3337        | Attention deficit hyperactivity disorder          | rs10983238 |

# volume\_Left-Cerebellum-Cortex

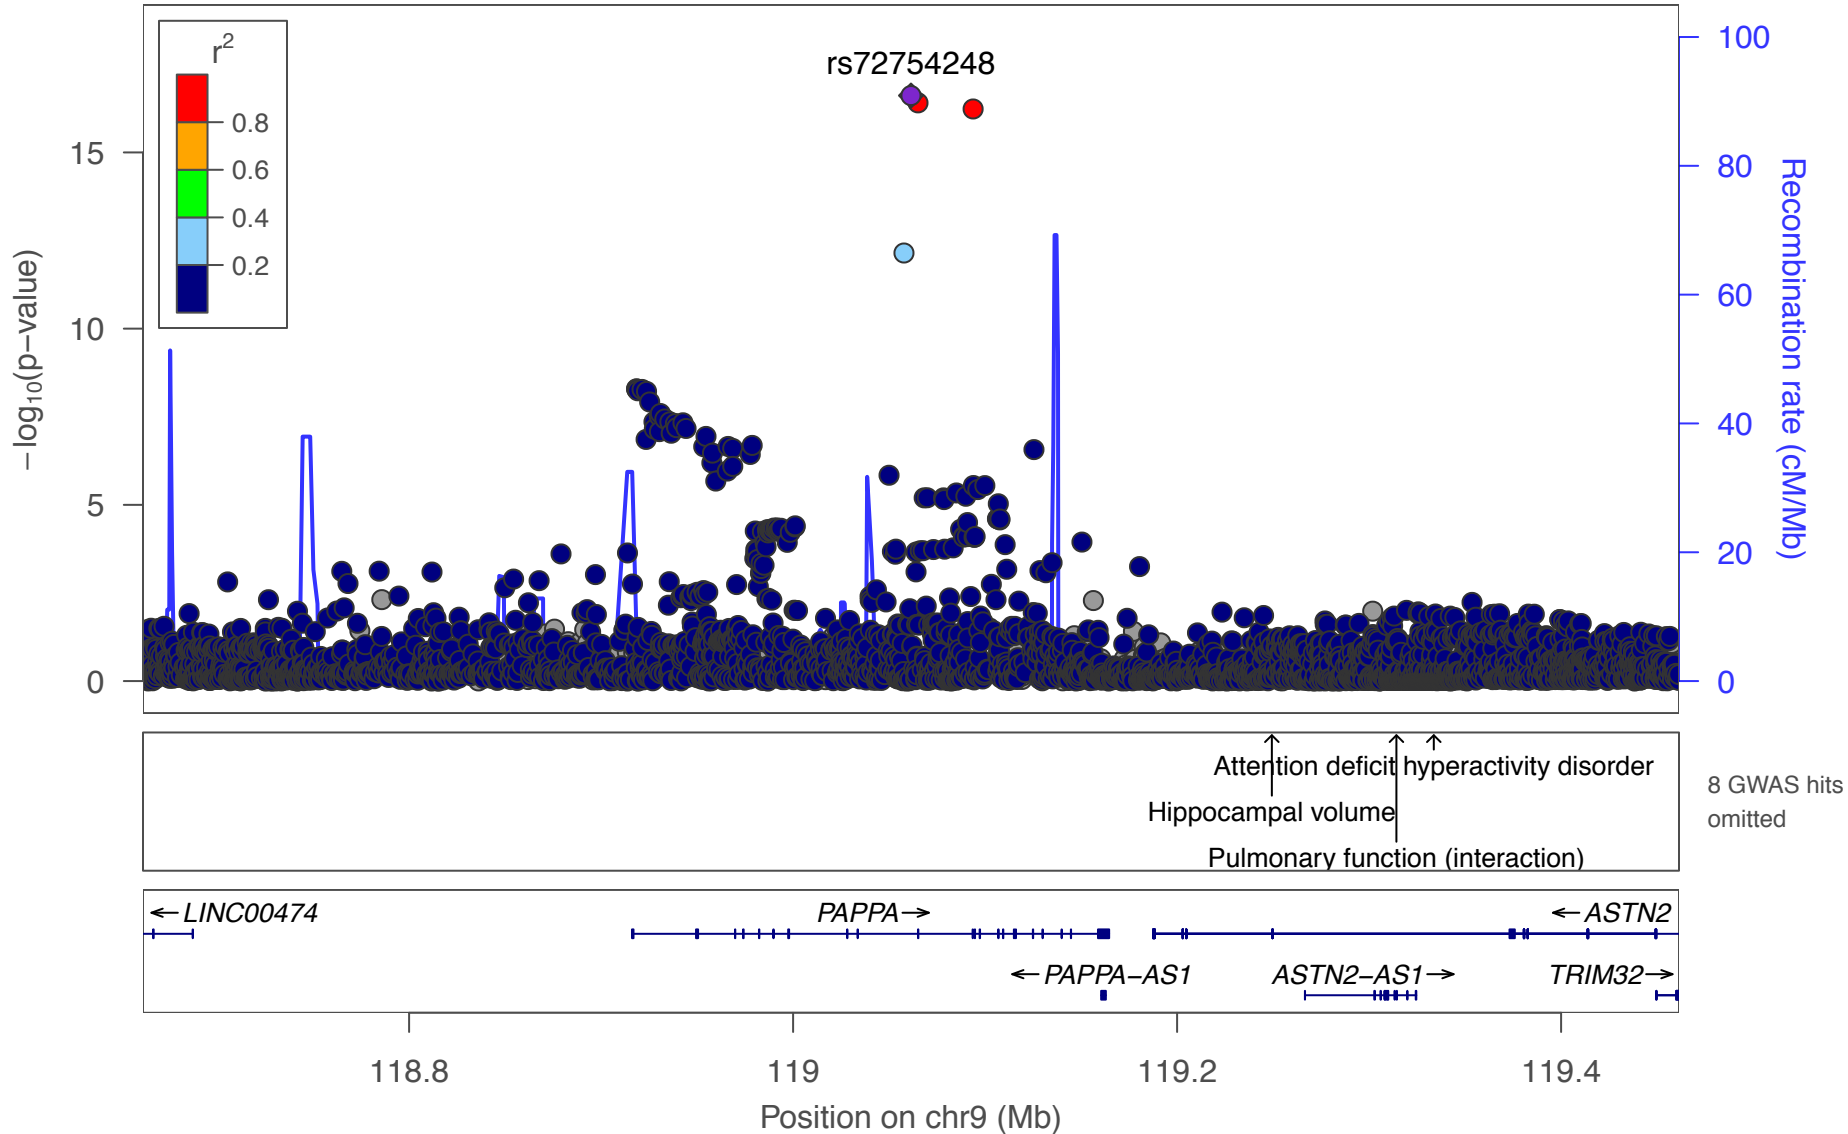



date: Thu Aug 17 18:10:37 2017

build: hg19

display range: chr9:118661396–119461396 [118661396–119461396]

hilite range: 0 – 0 [ 0 – 0 ]

reference SNP: chr9:119061396

number of SNPs plotted: 3336

min P.value: 2.43E–17 [chr9:119061396]

max P.value: 9.99E–1 [chr9:119342366]

omitted GWAS Hits: NA, NA

omitted GWAS Hits: NA, NA

omitted GWAS Hits: NA, NA

## GWAS Catalog SNPs in Region

| <b>chr</b> | <b>pos (Mb)</b> | <b>trait</b>                                      | <b>snp</b> |
|------------|-----------------|---------------------------------------------------|------------|
| 9          | 118.9567        | Conotruncal heart defects                         | rs436582   |
| 9          | 118.9650        | 3-hydroxypropylmercapturic acid levels in smokers | rs1003858  |
| 9          | 119.1223        | Height                                            | rs751543   |
| 9          | 119.1348        | Height                                            | rs7869550  |
| 9          | 119.1818        | Migraine                                          | rs17303101 |
| 9          | 119.2493        | Hippocampal volume                                | rs7852872  |
| 9          | 119.2526        | Migraine                                          | rs6478241  |
| 9          | 119.2526        | Migraine without aura                             | rs6478241  |
| 9          | 119.2526        | Migraine – clinic-based                           | rs6478241  |
| 9          | 119.3142        | Pulmonary function (interaction)                  | rs13290997 |
| 9          | 119.3337        | Attention deficit hyperactivity disorder          | rs10983238 |

# volume\_Right-Cerebellum-Cortex

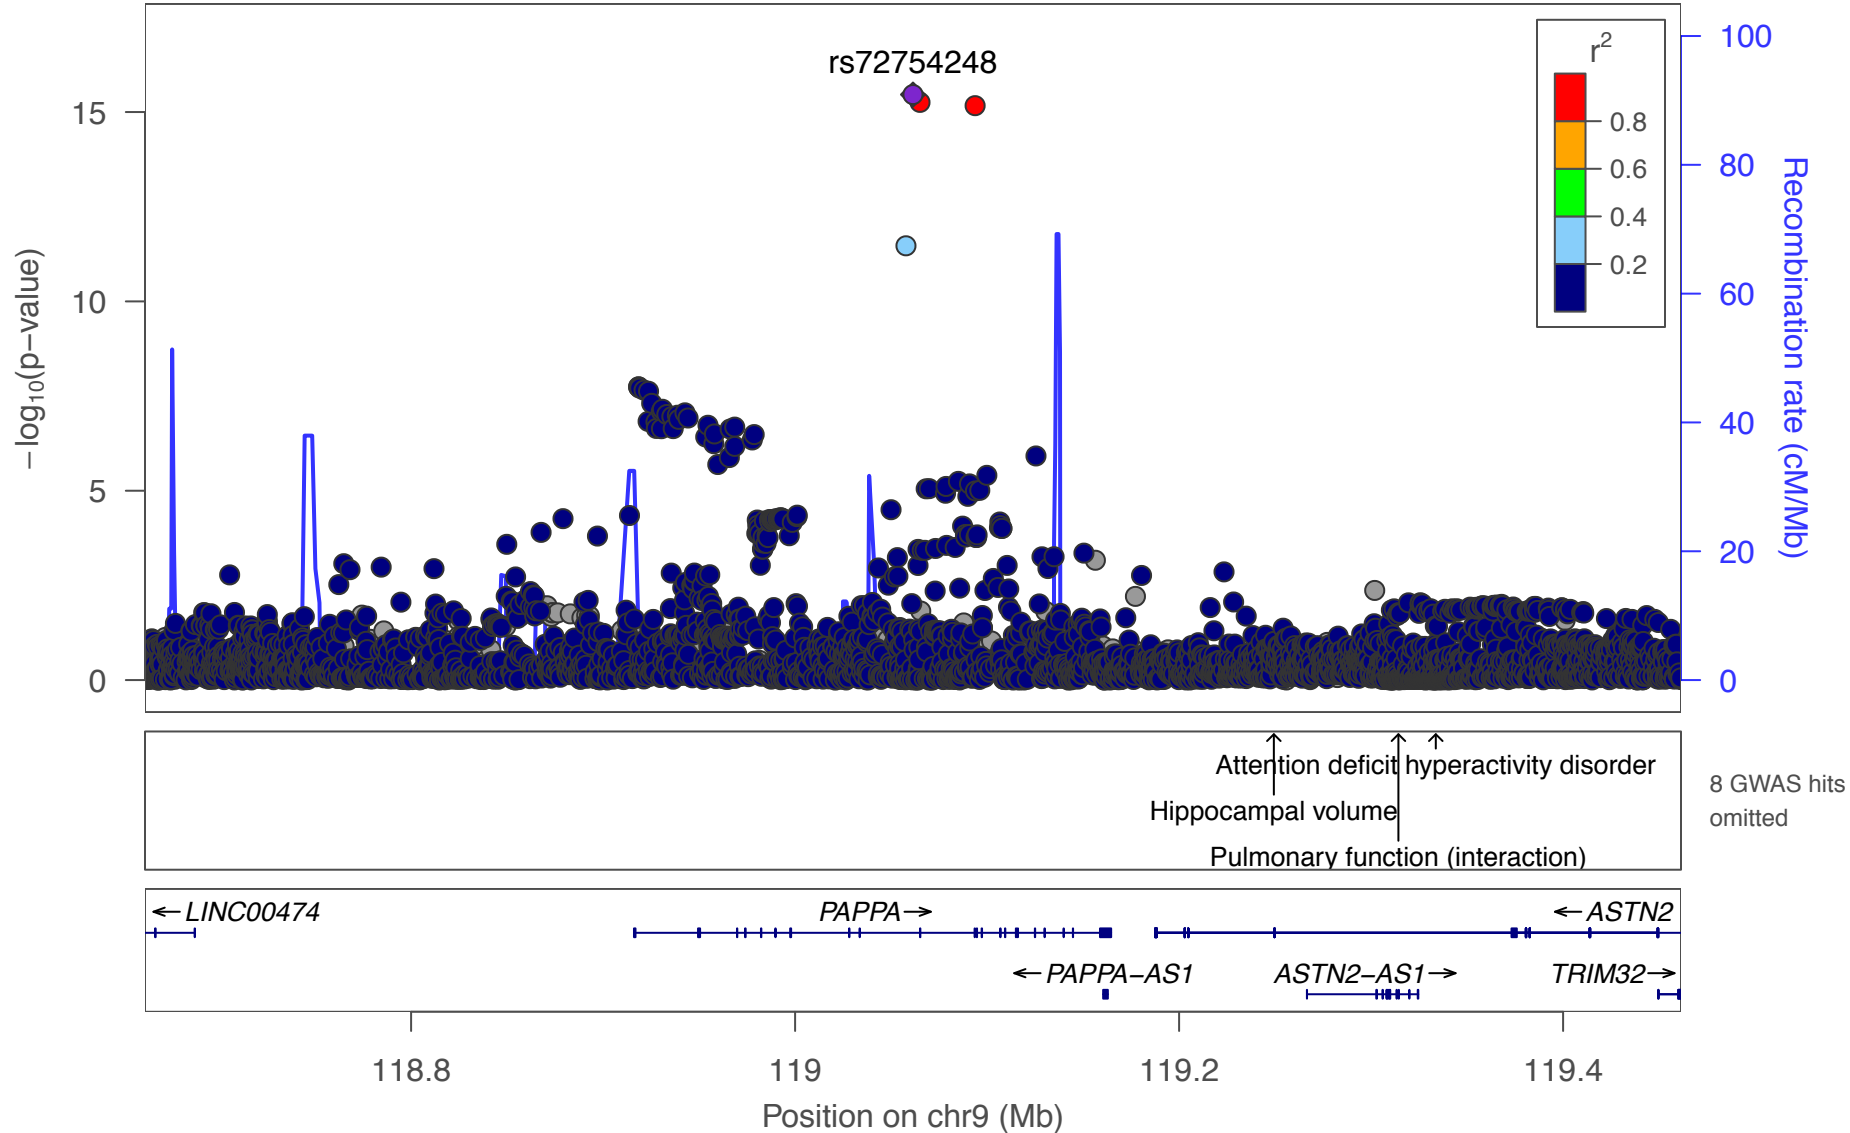

date: Thu Aug 17 18:22:31 2017

build: hg19

display range: chr9:118661396–119461396 [118661396–119461396]

hilite range: 0 – 0 [ 0 – 0 ]

reference SNP: chr9:119061396

number of SNPs plotted: 3336

min P.value: 3.45E–16 [chr9:119061396]

max P.value: 10E–1 [chr9:118668675]

omitted GWAS Hits: NA, NA

omitted GWAS Hits: NA, NA

omitted GWAS Hits: NA, NA

## GWAS Catalog SNPs in Region

| <b>chr</b> | <b>pos (Mb)</b> | <b>trait</b>                                      | <b>snp</b> |
|------------|-----------------|---------------------------------------------------|------------|
| 9          | 118.9567        | Conotruncal heart defects                         | rs436582   |
| 9          | 118.9650        | 3-hydroxypropylmercapturic acid levels in smokers | rs1003858  |
| 9          | 119.1223        | Height                                            | rs751543   |
| 9          | 119.1348        | Height                                            | rs7869550  |
| 9          | 119.1818        | Migraine                                          | rs17303101 |
| 9          | 119.2493        | Hippocampal volume                                | rs7852872  |
| 9          | 119.2526        | Migraine                                          | rs6478241  |
| 9          | 119.2526        | Migraine without aura                             | rs6478241  |
| 9          | 119.2526        | Migraine – clinic-based                           | rs6478241  |
| 9          | 119.3142        | Pulmonary function (interaction)                  | rs13290997 |
| 9          | 119.3337        | Attention deficit hyperactivity disorder          | rs10983238 |

# SWI\_T2star\_left\_caudate

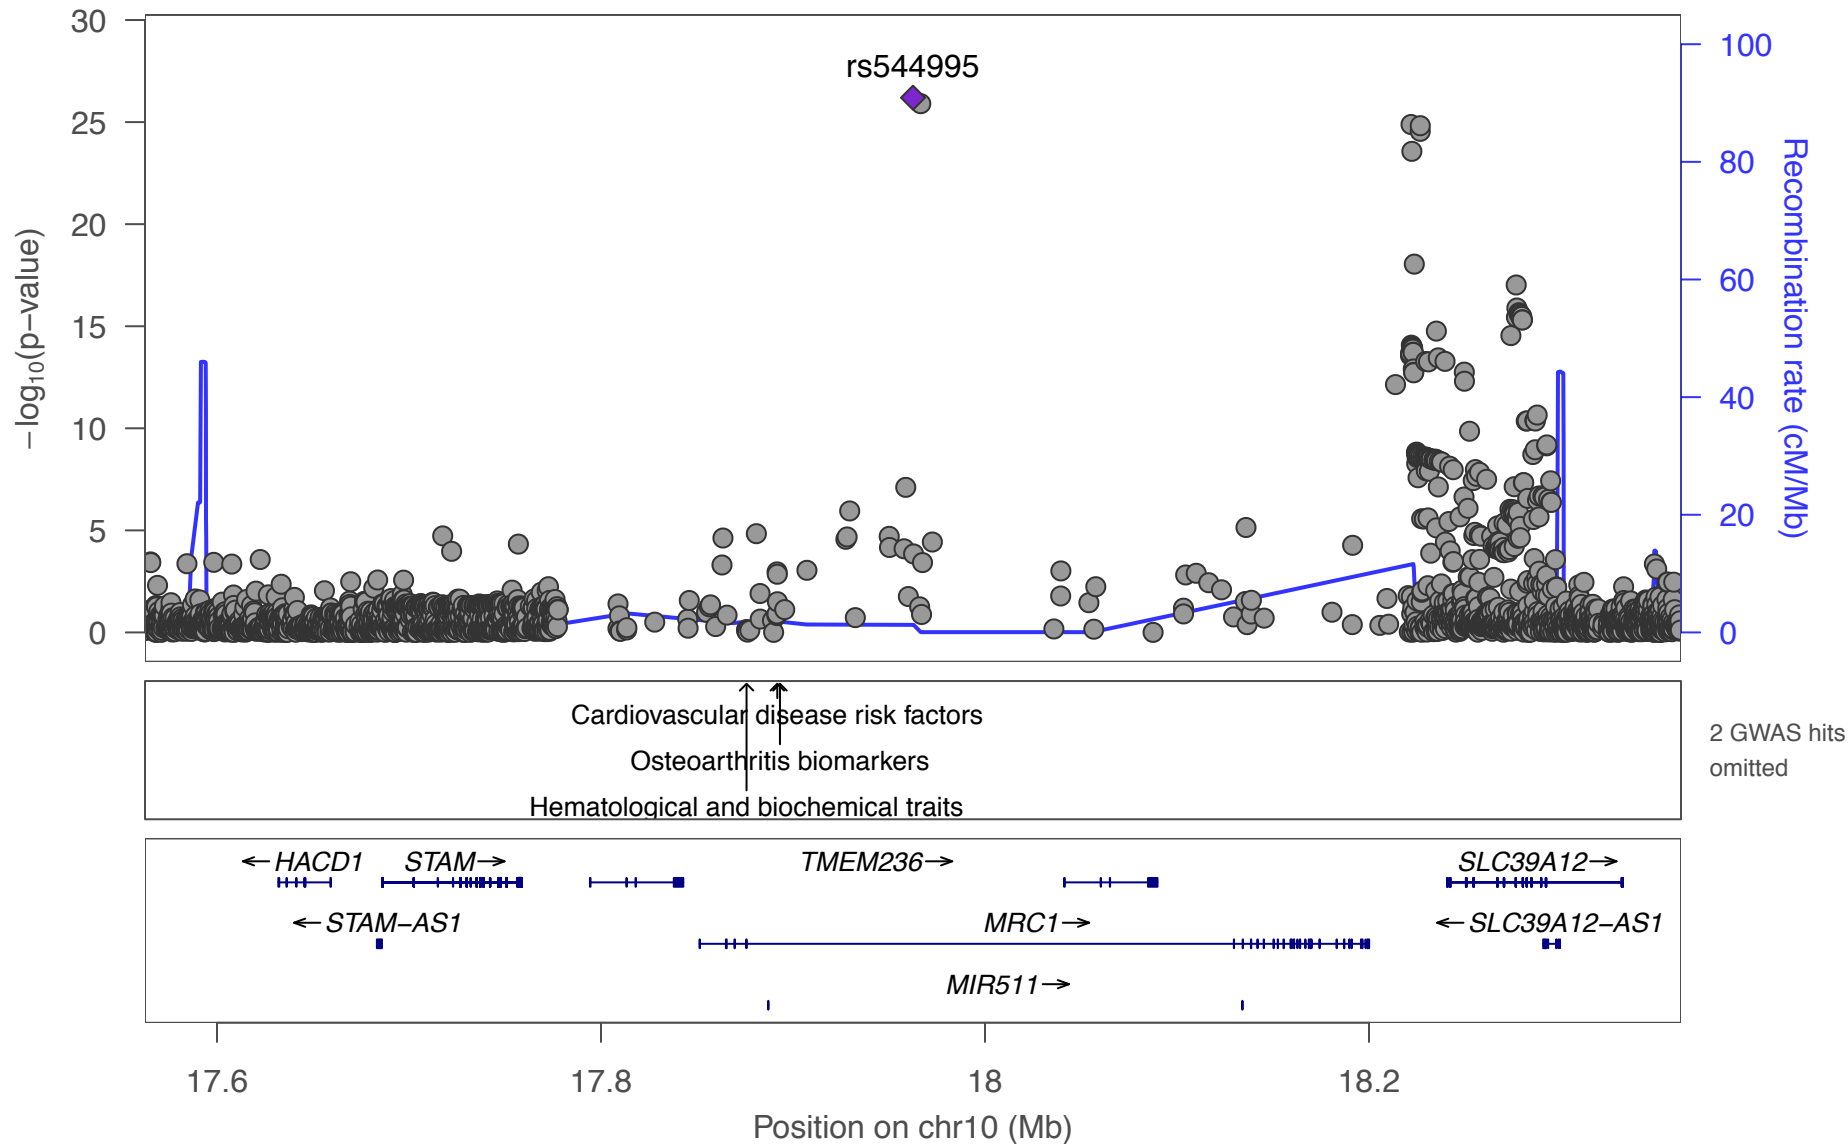

date: Thu Aug 17 17:52:01 2017

build: hg19

display range: chr10:17562506–18362506 [17562506–18362506]

hilite range: 0 – 0 [ 0 – 0 ]

reference SNP: chr10:17962506

number of SNPs plotted: 2378

min P.value: 6.37E–27 [chr10:17962506]

max P.value: 9.99E–1 [chr10:17720533]

omitted GWAS Hits: NA, NA

Warning: No usable LD information for reference SNP.

## GWAS Catalog SNPs in Region

| <b>chr</b> | <b>pos (Mb)</b> | <b>trait</b>                                        | <b>snp</b> |
|------------|-----------------|-----------------------------------------------------|------------|
| 10         | 17.59612        | Glucose homeostasis traits                          | rs6602203  |
| 10         | 17.87582        | Hematological and biochemical traits                | rs2477664  |
| 10         | 17.89182        | Cardiovascular disease risk factors                 | rs2437258  |
| 10         | 17.89321        | Osteoarthritis biomarkers                           | rs691461   |
| 10         | 17.96656        | Childhood and early adolescence aggressive behavior | rs10508552 |



# SWI\_T2star\_right\_caudate

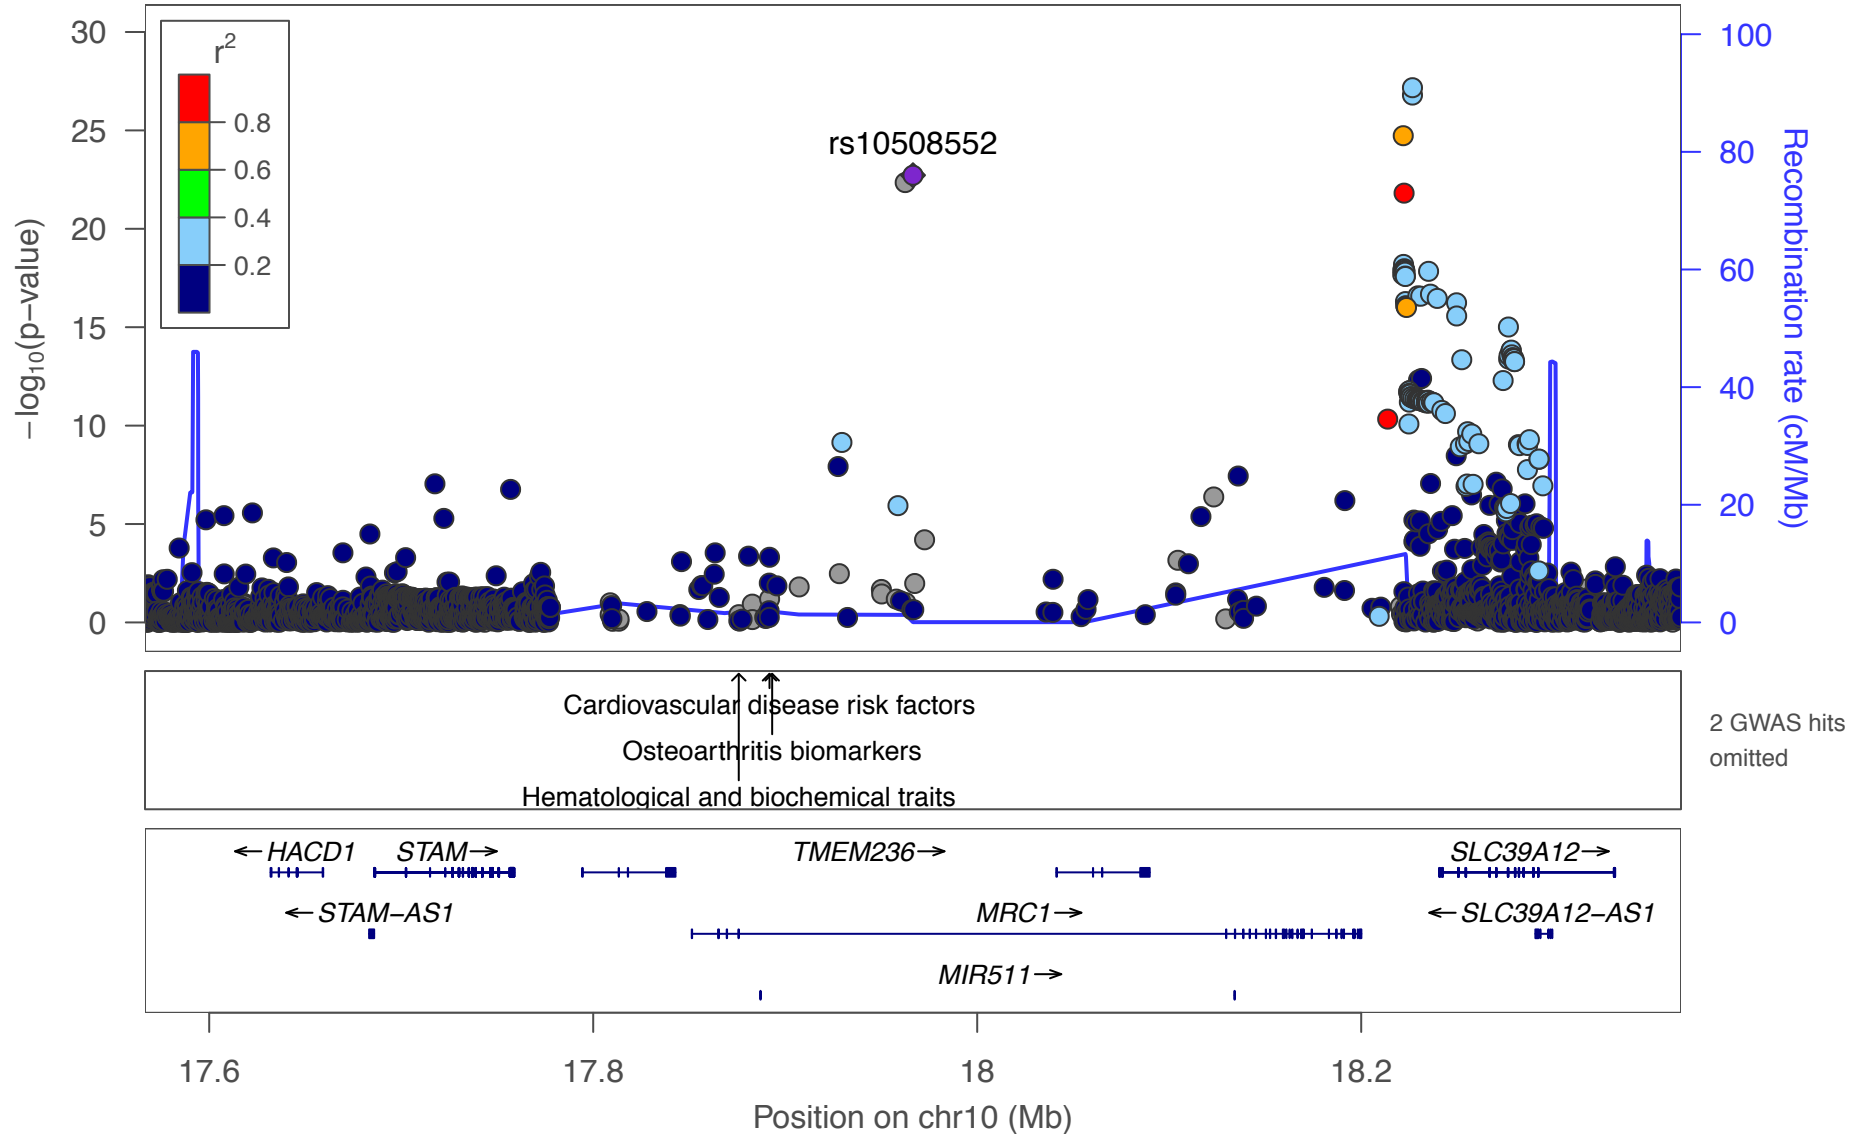

date: Thu Aug 17 18:05:07 2017

build: hg19

display range: chr10:17566561–18366561 [17566561–18366561]

hilite range: 0 – 0 [ 0 – 0 ]

reference SNP: chr10:17966561

number of SNPs plotted: 2390

min P.value: 6.76E–28 [chr10:18226714]

max P.value: 10E–1 [chr10:17593986]

omitted GWAS Hits: NA, NA

## GWAS Catalog SNPs in Region

| <b>chr</b> | <b>pos (Mb)</b> | <b>trait</b>                                        | <b>snp</b> |
|------------|-----------------|-----------------------------------------------------|------------|
| 10         | 17.59612        | Glucose homeostasis traits                          | rs6602203  |
| 10         | 17.87582        | Hematological and biochemical traits                | rs2477664  |
| 10         | 17.89182        | Cardiovascular disease risk factors                 | rs2437258  |
| 10         | 17.89321        | Osteoarthritis biomarkers                           | rs691461   |
| 10         | 17.96656        | Childhood and early adolescence aggressive behavior | rs10508552 |

# SWI\_T2star\_left\_putamen

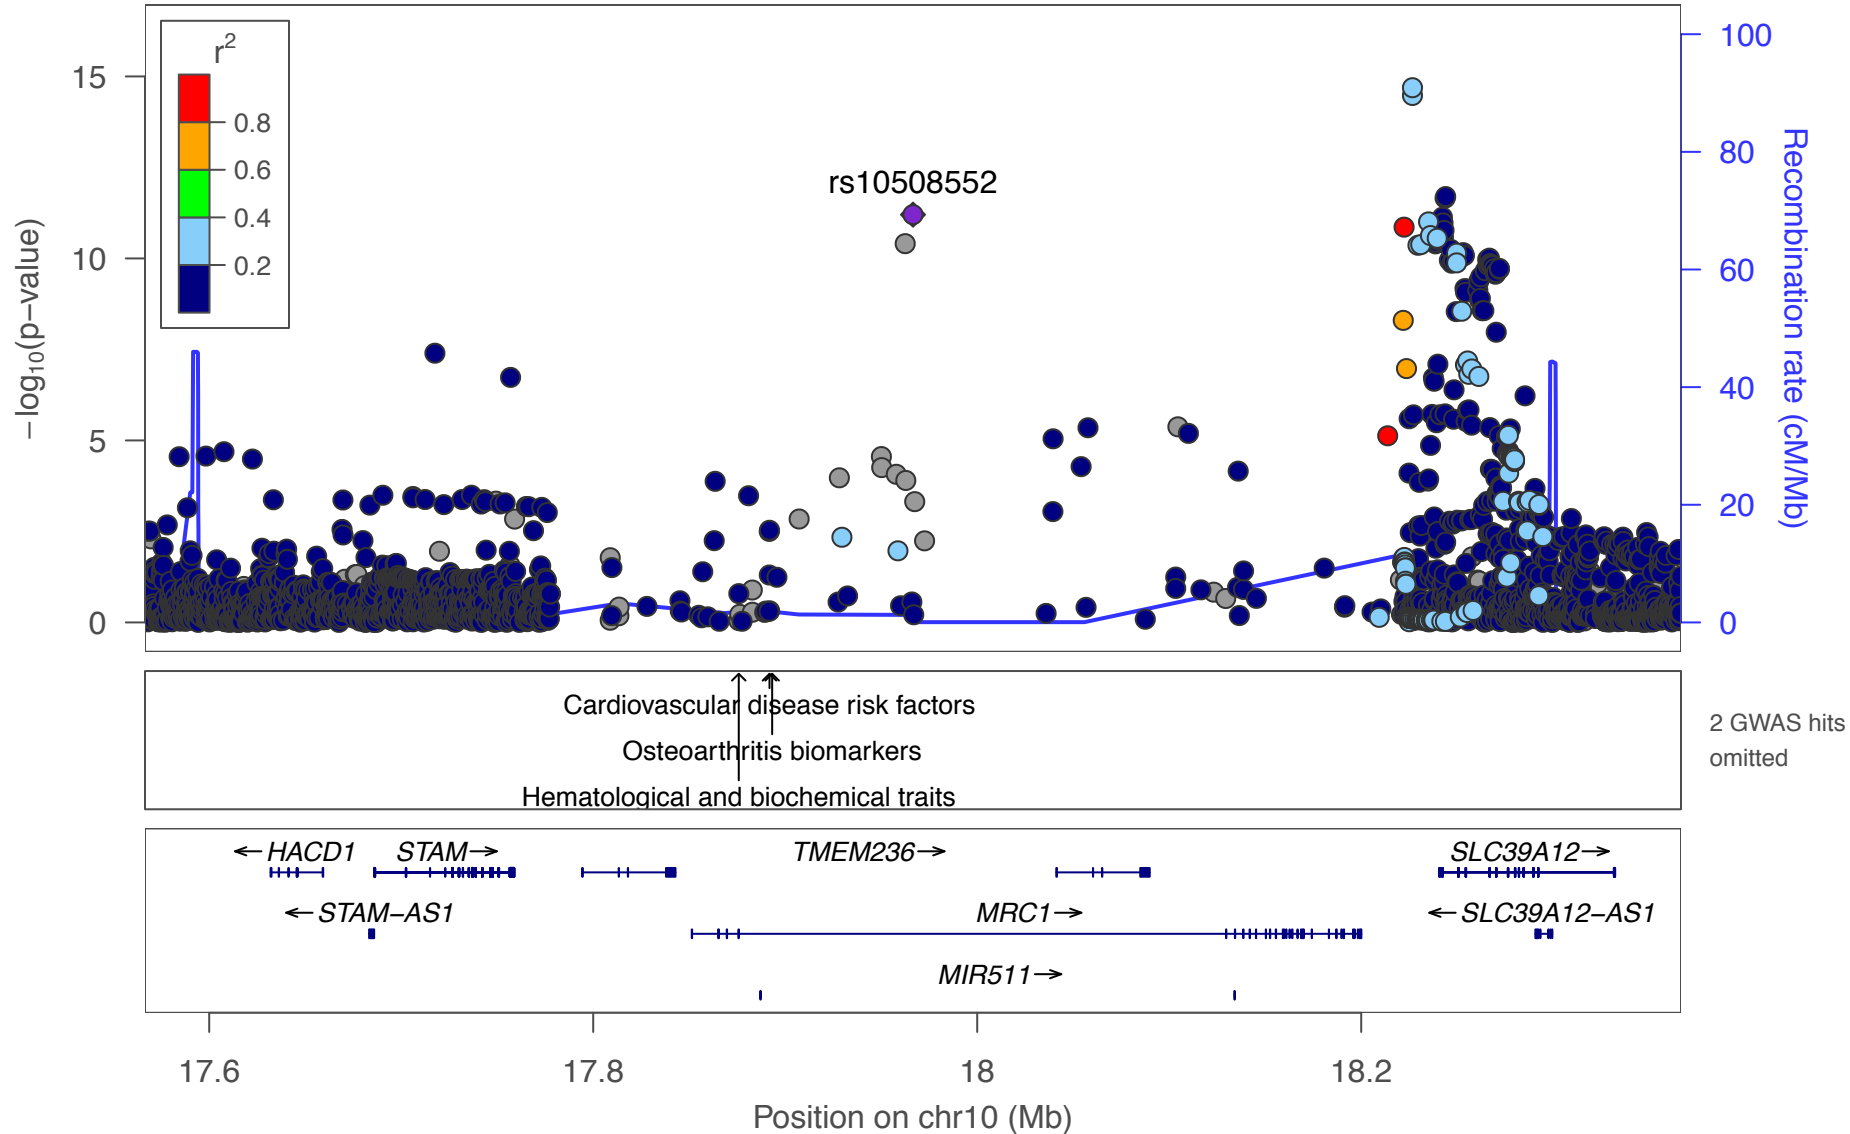

date: Thu Aug 17 18:05:08 2017

build: hg19

display range: chr10:17566561–18366561 [17566561–18366561]

hilite range: 0 – 0 [ 0 – 0 ]

reference SNP: chr10:17966561

number of SNPs plotted: 2390

min P.value: 2.04E–15 [chr10:18226714]

max P.value: 10E–1 [chr10:17685893]

omitted GWAS Hits: NA, NA

## GWAS Catalog SNPs in Region

| <b>chr</b> | <b>pos (Mb)</b> | <b>trait</b>                                        | <b>snp</b> |
|------------|-----------------|-----------------------------------------------------|------------|
| 10         | 17.59612        | Glucose homeostasis traits                          | rs6602203  |
| 10         | 17.87582        | Hematological and biochemical traits                | rs2477664  |
| 10         | 17.89182        | Cardiovascular disease risk factors                 | rs2437258  |
| 10         | 17.89321        | Osteoarthritis biomarkers                           | rs691461   |
| 10         | 17.96656        | Childhood and early adolescence aggressive behavior | rs10508552 |

# SWI\_T2star\_right\_putamen

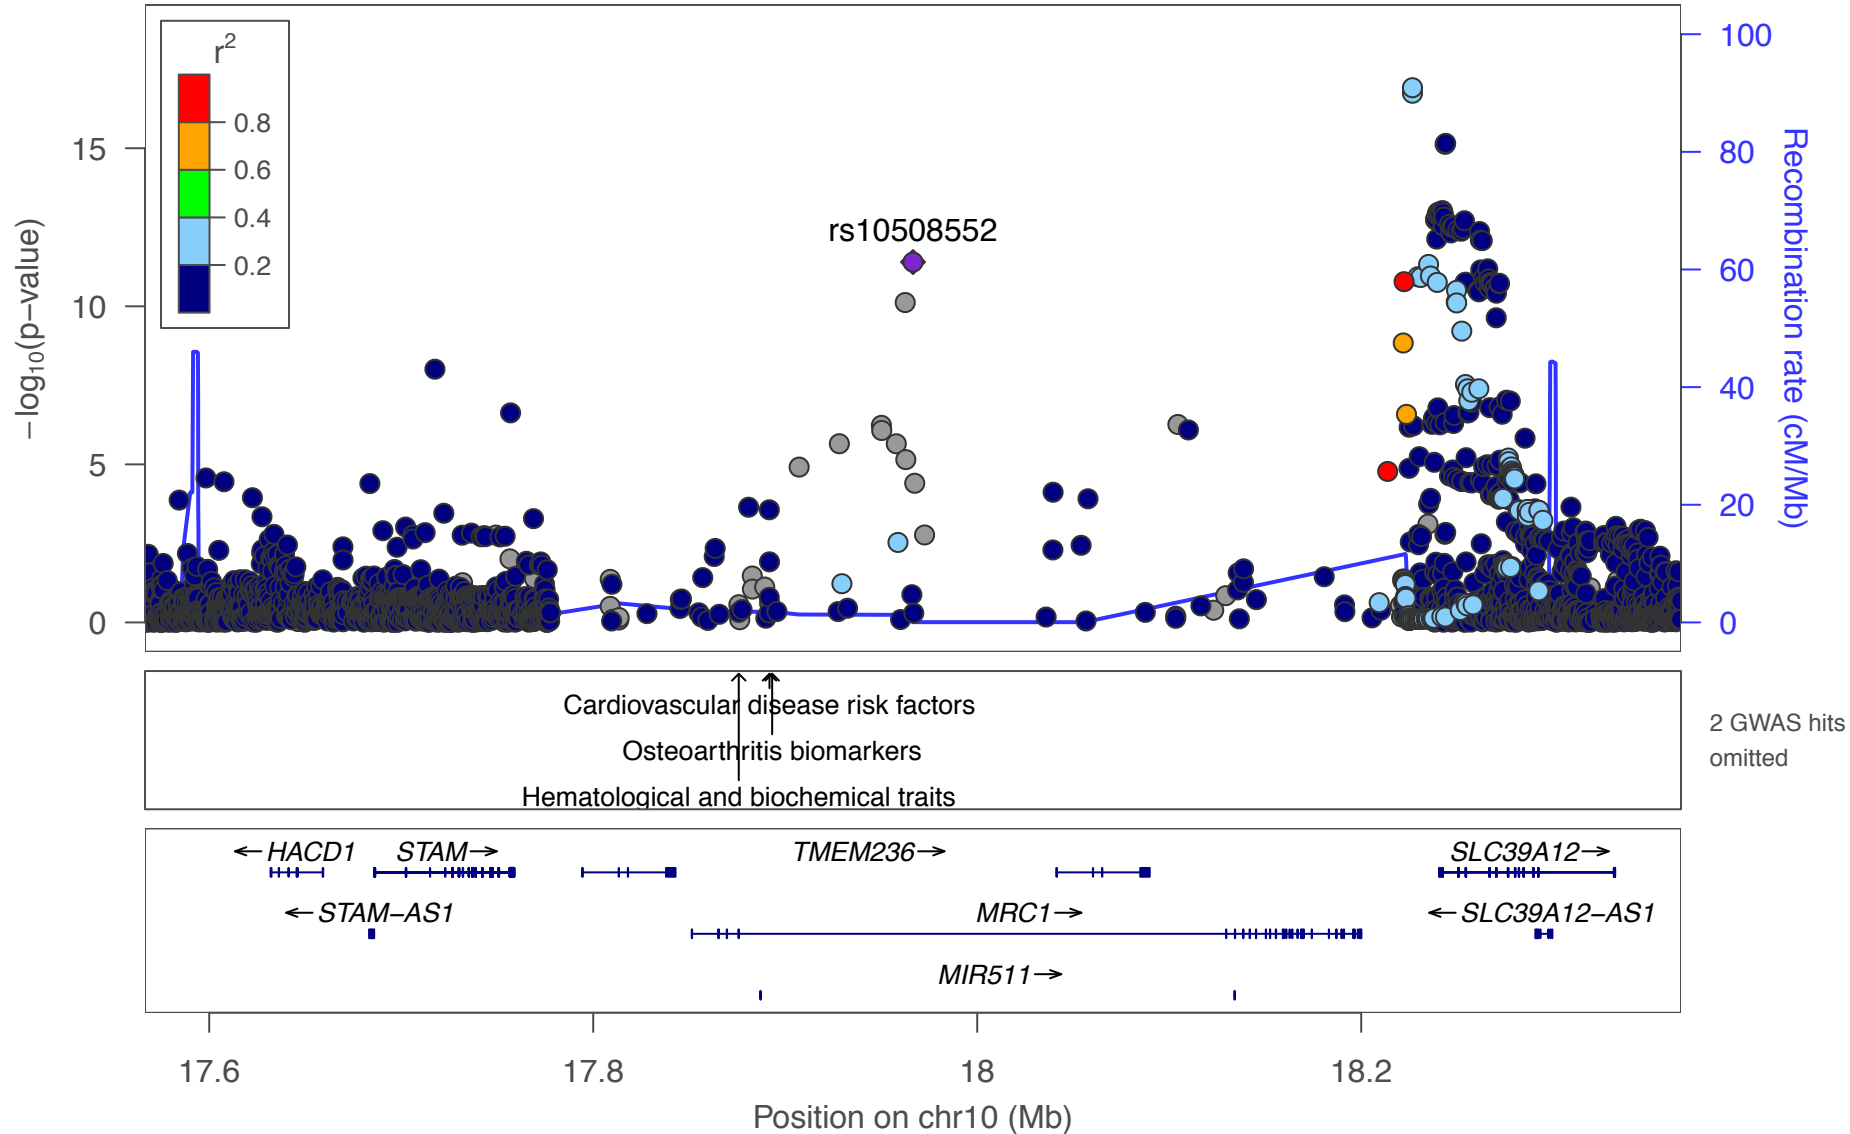

date: Thu Aug 17 18:05:07 2017

build: hg19

display range: chr10:17566561–18366561 [17566561–18366561]

hilite range: 0 – 0 [ 0 – 0 ]

reference SNP: chr10:17966561

number of SNPs plotted: 2390

min P.value: 1.21E–17 [chr10:18226714]

max P.value: 10E–1 [chr10:17582716]

omitted GWAS Hits: NA, NA



## GWAS Catalog SNPs in Region

| <b>chr</b> | <b>pos (Mb)</b> | <b>trait</b>                                        | <b>snp</b> |
|------------|-----------------|-----------------------------------------------------|------------|
| 10         | 17.59612        | Glucose homeostasis traits                          | rs6602203  |
| 10         | 17.87582        | Hematological and biochemical traits                | rs2477664  |
| 10         | 17.89182        | Cardiovascular disease risk factors                 | rs2437258  |
| 10         | 17.89321        | Osteoarthritis biomarkers                           | rs691461   |
| 10         | 17.96656        | Childhood and early adolescence aggressive behavior | rs10508552 |

# SWI\_T2star\_left\_pallidum

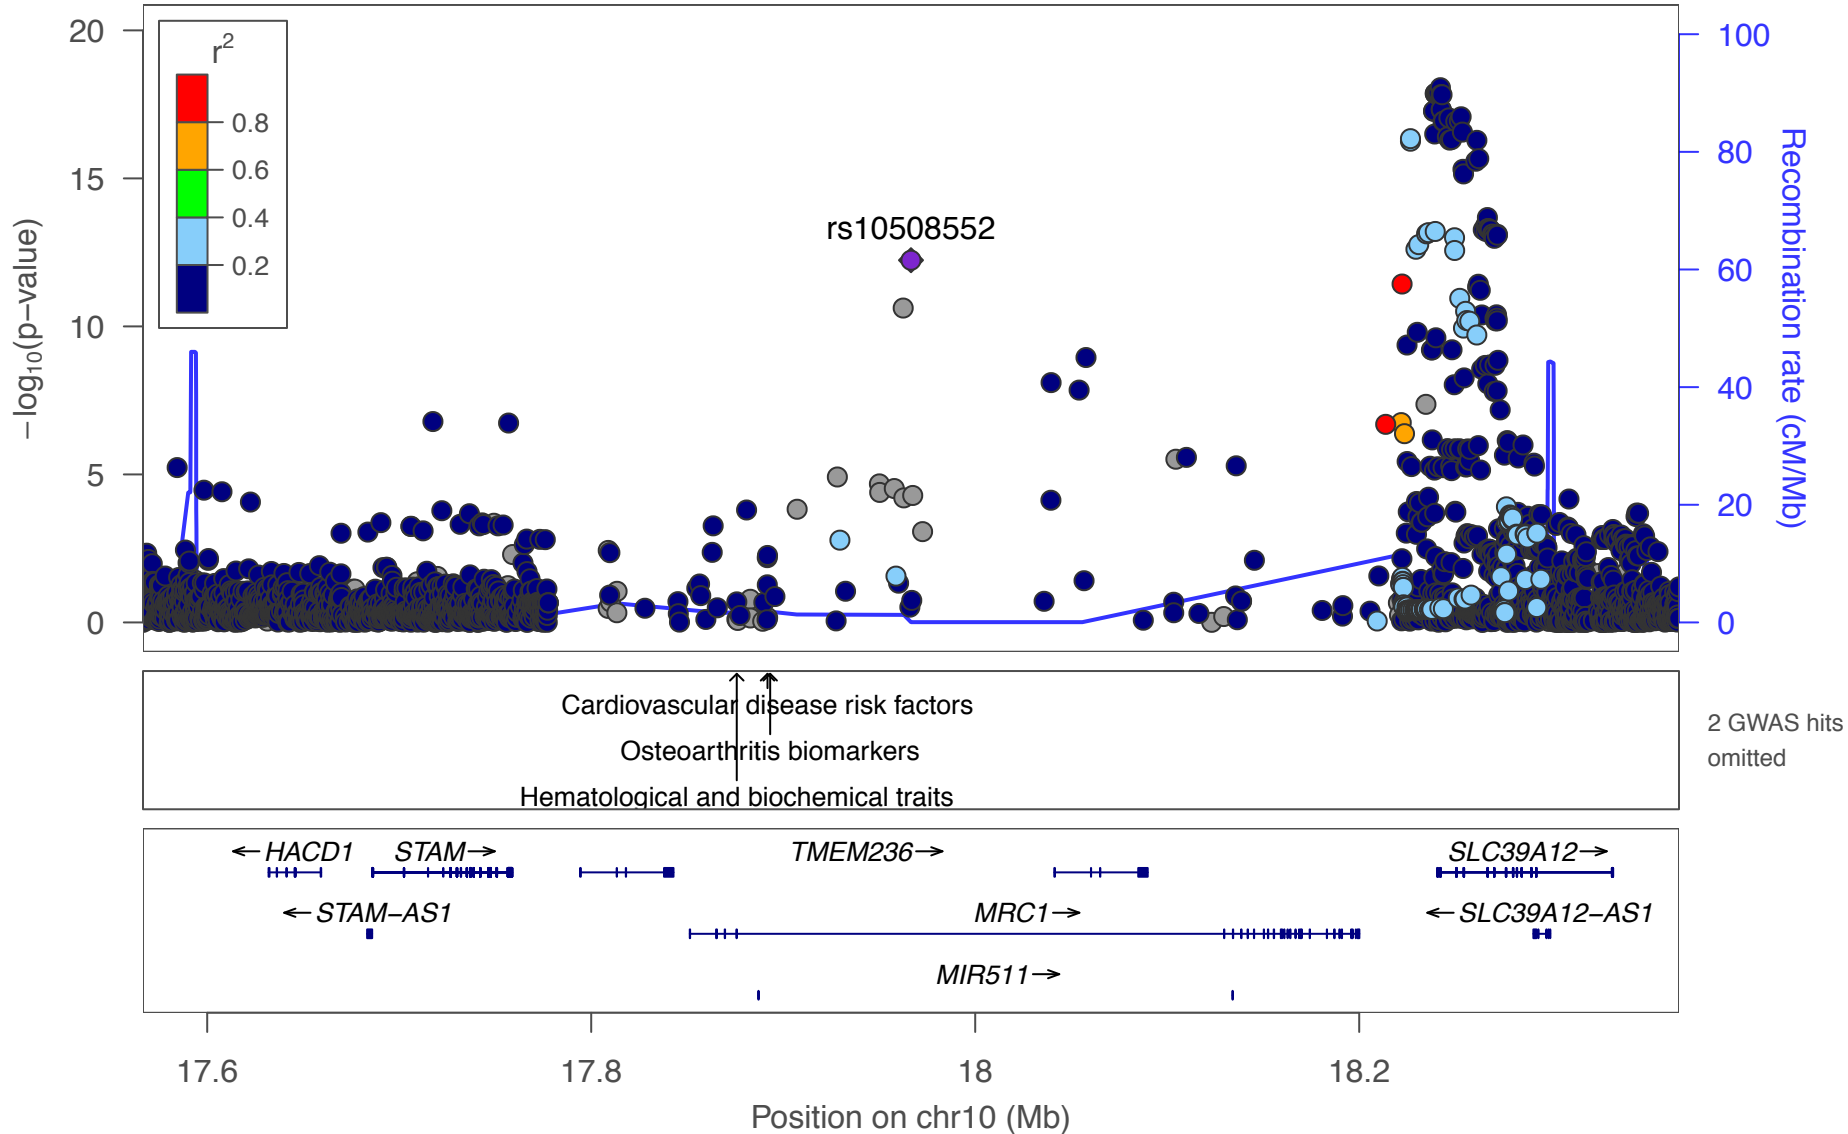

date: Thu Aug 17 17:54:38 2017

build: hg19

display range: chr10:17566561–18366561 [17566561–18366561]

hilite range: 0 – 0 [ 0 – 0 ]

reference SNP: chr10:17966561

number of SNPs plotted: 2390

min P.value: 8.63E–19 [chr10:18242311]

max P.value: 9.99E–1 [chr10:17741046]

omitted GWAS Hits: NA, NA

## GWAS Catalog SNPs in Region

| <b>chr</b> | <b>pos (Mb)</b> | <b>trait</b>                                        | <b>snp</b> |
|------------|-----------------|-----------------------------------------------------|------------|
| 10         | 17.59612        | Glucose homeostasis traits                          | rs6602203  |
| 10         | 17.87582        | Hematological and biochemical traits                | rs2477664  |
| 10         | 17.89182        | Cardiovascular disease risk factors                 | rs2437258  |
| 10         | 17.89321        | Osteoarthritis biomarkers                           | rs691461   |
| 10         | 17.96656        | Childhood and early adolescence aggressive behavior | rs10508552 |

# SWI\_T2star\_left\_caudate\_plus\_right\_caudate

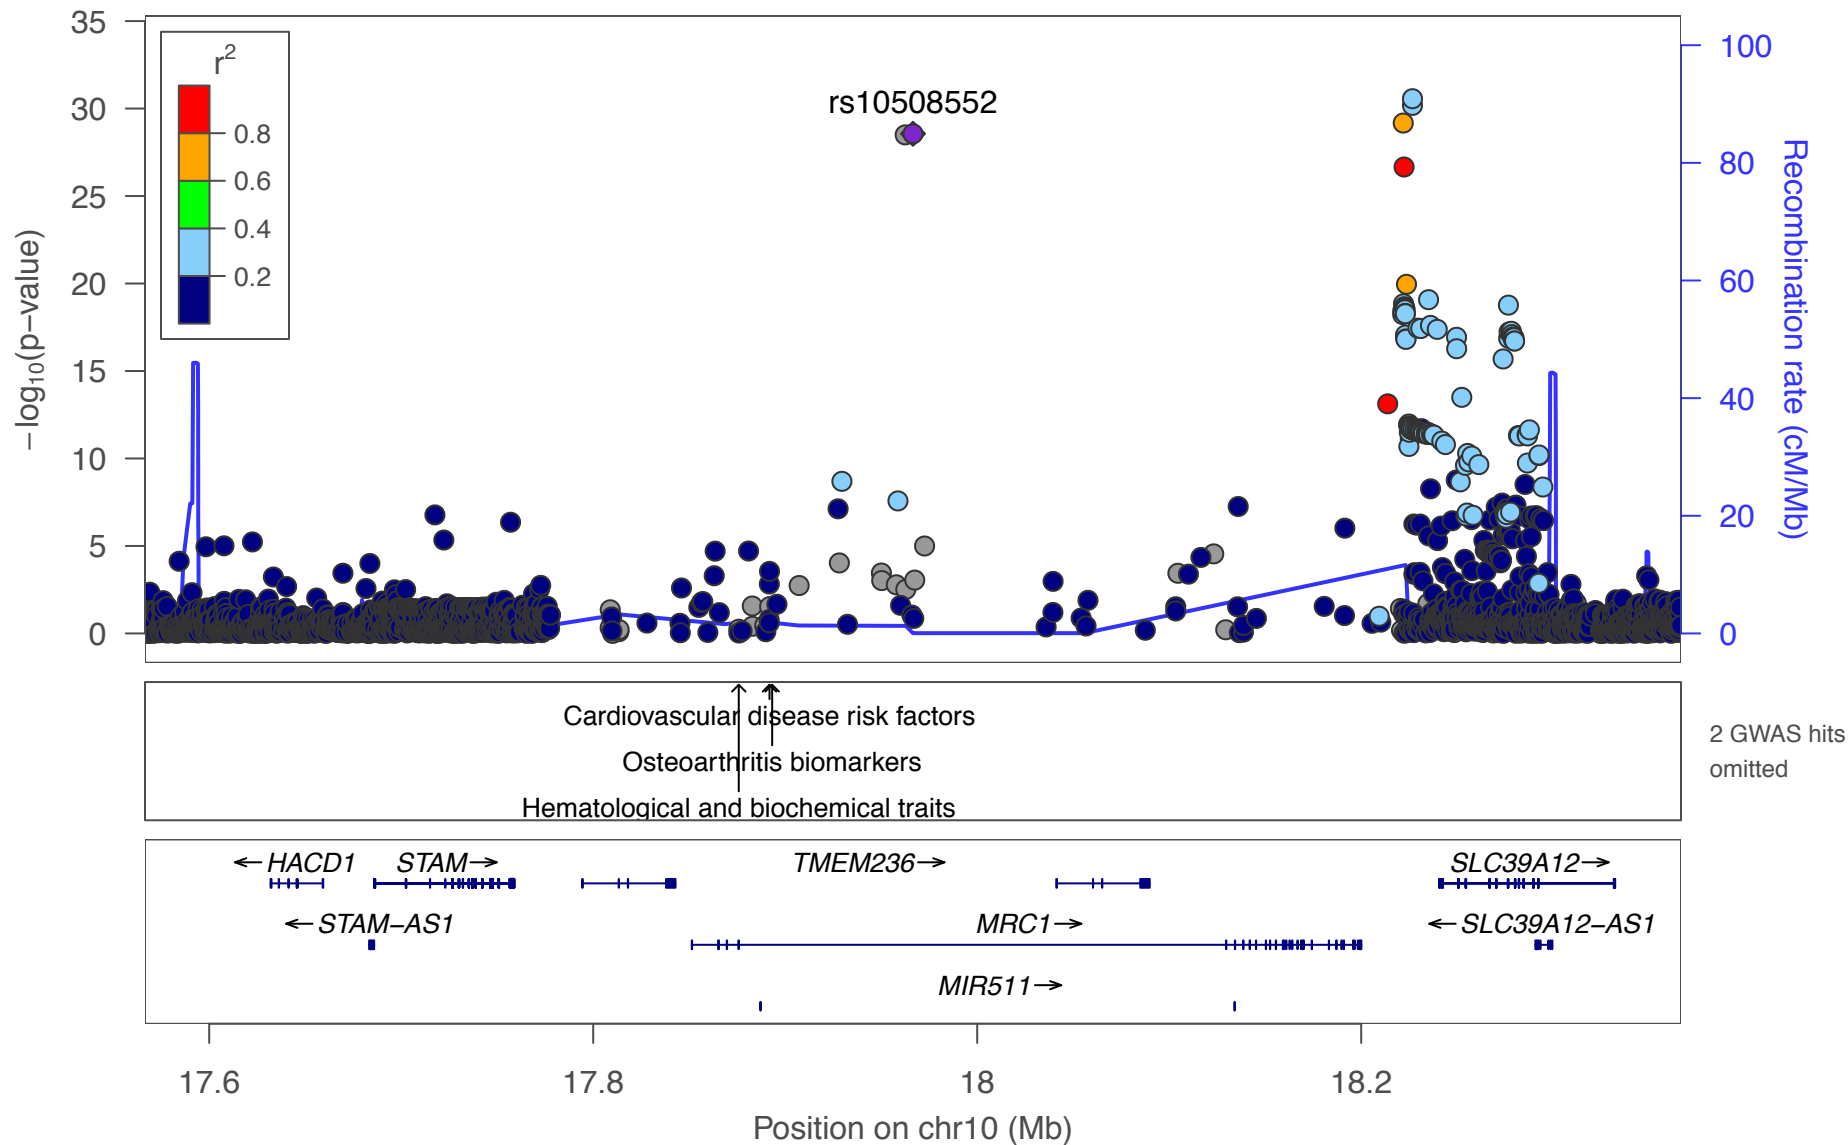

date: Thu Aug 17 18:00:15 2017

build: hg19

display range: chr10:17566561–18366561 [17566561–18366561]

hilite range: 0 – 0 [ 0 – 0 ]

reference SNP: chr10:17966561

number of SNPs plotted: 2390

min P.value: 2.73E–31 [chr10:18226714]

max P.value: 9.97E–1 [chr10:18324574]

omitted GWAS Hits: NA, NA

## GWAS Catalog SNPs in Region

| <b>chr</b> | <b>pos (Mb)</b> | <b>trait</b>                                        | <b>snp</b> |
|------------|-----------------|-----------------------------------------------------|------------|
| 10         | 17.59612        | Glucose homeostasis traits                          | rs6602203  |
| 10         | 17.87582        | Hematological and biochemical traits                | rs2477664  |
| 10         | 17.89182        | Cardiovascular disease risk factors                 | rs2437258  |
| 10         | 17.89321        | Osteoarthritis biomarkers                           | rs691461   |
| 10         | 17.96656        | Childhood and early adolescence aggressive behavior | rs10508552 |

# SWI\_T2star\_left\_putamen\_plus\_right\_putamen

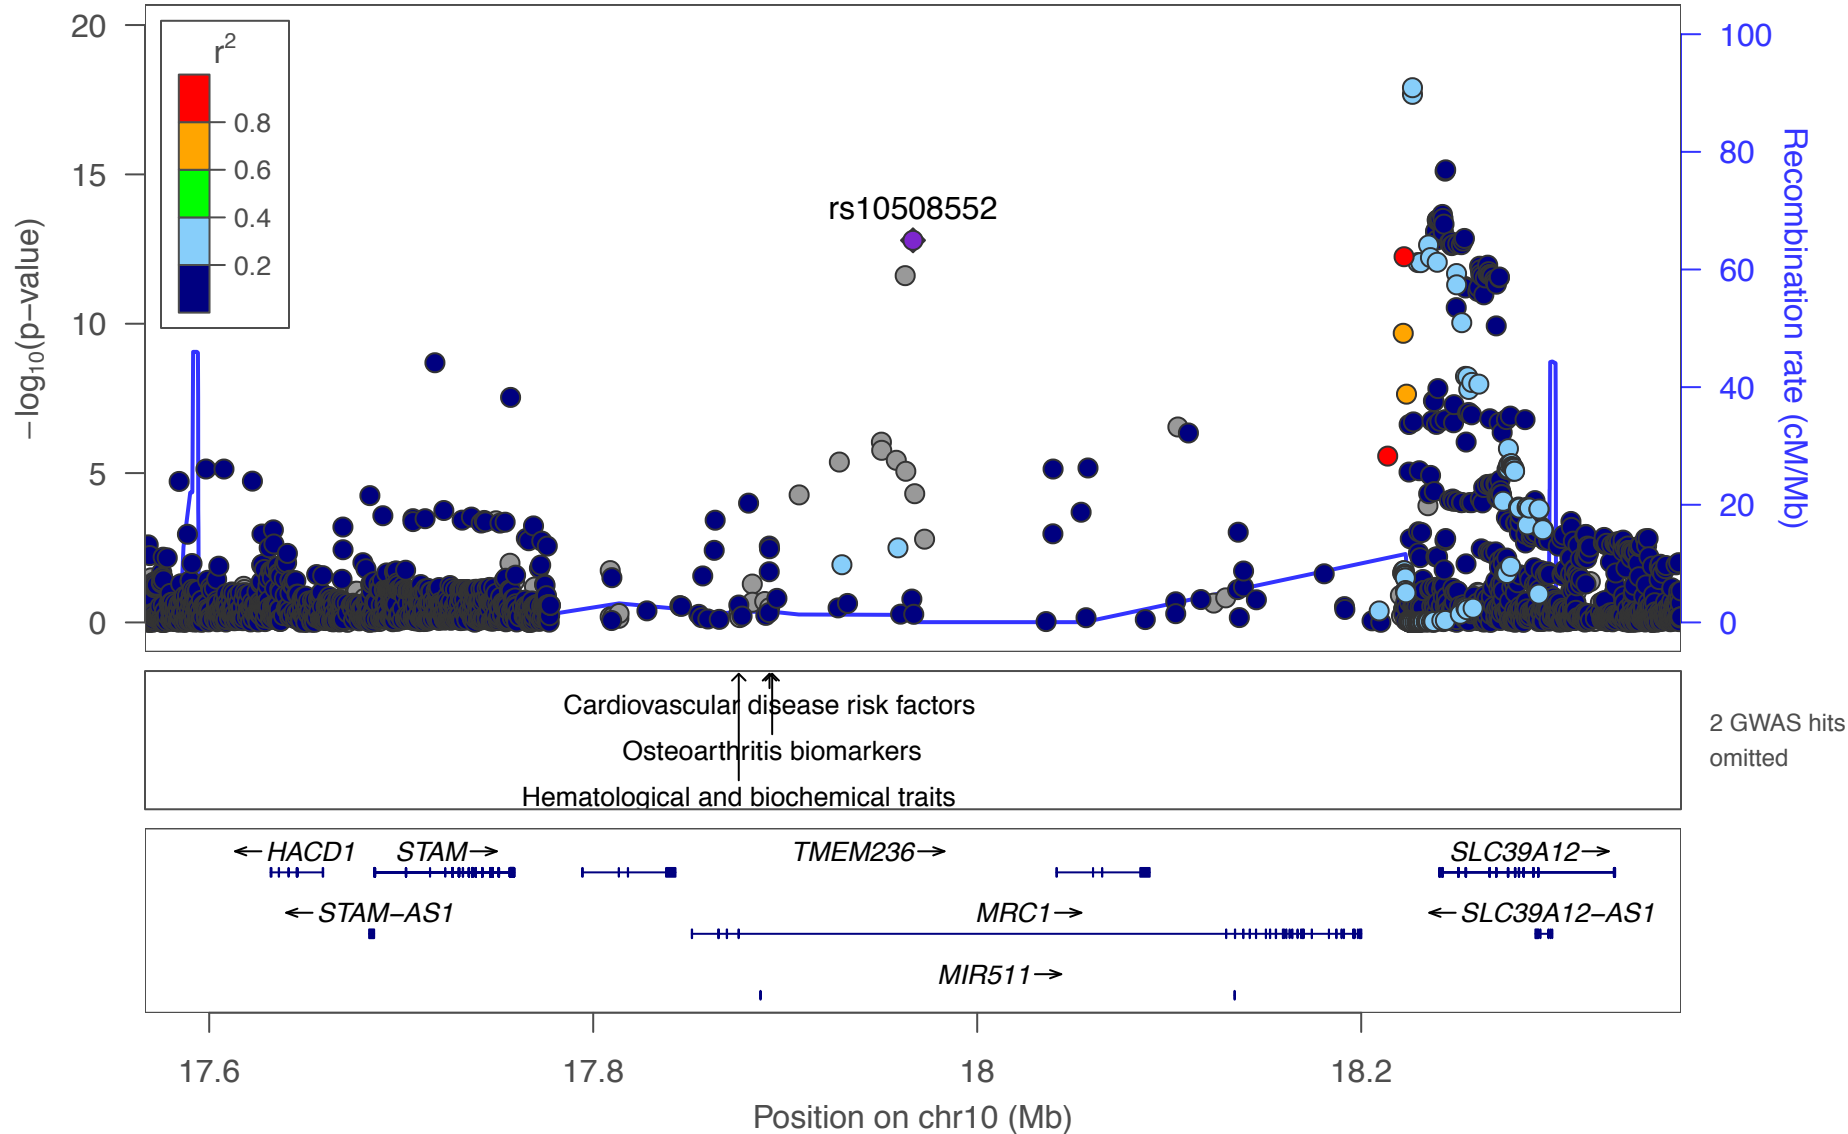



date: Thu Aug 17 17:56:57 2017

build: hg19

display range: chr10:17566561–18366561 [17566561–18366561]

hilite range: 0 – 0 [ 0 – 0 ]

reference SNP: chr10:17966561

number of SNPs plotted: 2390

min P.value: 1.25E–18 [chr10:18226714]

max P.value: 9.99E–1 [chr10:17650307]

omitted GWAS Hits: NA, NA

## GWAS Catalog SNPs in Region

| <b>chr</b> | <b>pos (Mb)</b> | <b>trait</b>                                        | <b>snp</b> |
|------------|-----------------|-----------------------------------------------------|------------|
| 10         | 17.59612        | Glucose homeostasis traits                          | rs6602203  |
| 10         | 17.87582        | Hematological and biochemical traits                | rs2477664  |
| 10         | 17.89182        | Cardiovascular disease risk factors                 | rs2437258  |
| 10         | 17.89321        | Osteoarthritis biomarkers                           | rs691461   |
| 10         | 17.96656        | Childhood and early adolescence aggressive behavior | rs10508552 |

# SWI\_T2star\_left\_pallidum\_plus\_right\_pallidum

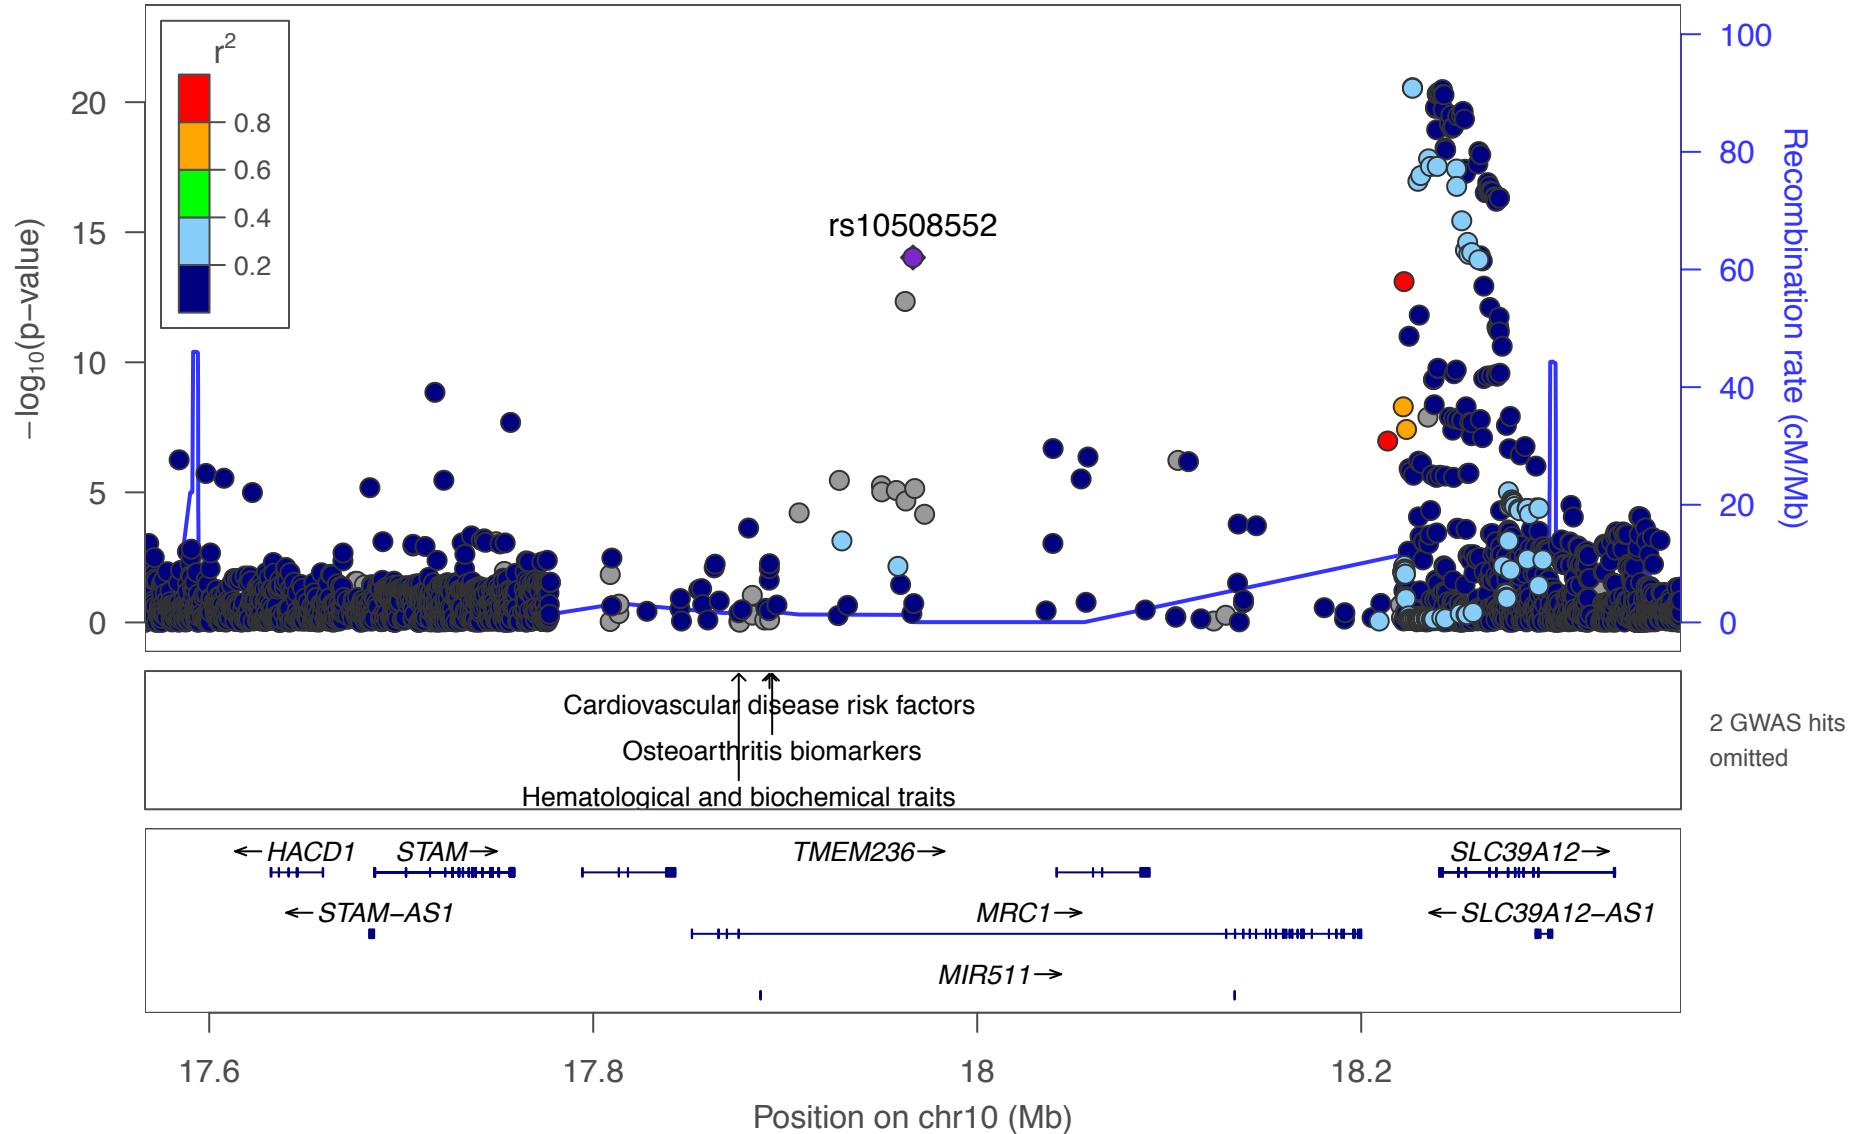

date: Thu Aug 17 18:00:17 2017

build: hg19

display range: chr10:17566561–18366561 [17566561–18366561]

hilite range: 0 – 0 [ 0 – 0 ]

reference SNP: chr10:17966561

number of SNPs plotted: 2390

min P.value: 2.78E–21 [chr10:18226707]

max P.value: 10E–1 [chr10:17754182]

omitted GWAS Hits: NA, NA

## GWAS Catalog SNPs in Region

| <b>chr</b> | <b>pos (Mb)</b> | <b>trait</b>                                        | <b>snp</b> |
|------------|-----------------|-----------------------------------------------------|------------|
| 10         | 17.59612        | Glucose homeostasis traits                          | rs6602203  |
| 10         | 17.87582        | Hematological and biochemical traits                | rs2477664  |
| 10         | 17.89182        | Cardiovascular disease risk factors                 | rs2437258  |
| 10         | 17.89321        | Osteoarthritis biomarkers                           | rs691461   |
| 10         | 17.96656        | Childhood and early adolescence aggressive behavior | rs10508552 |

# SWI\_T2star\_left\_caudate

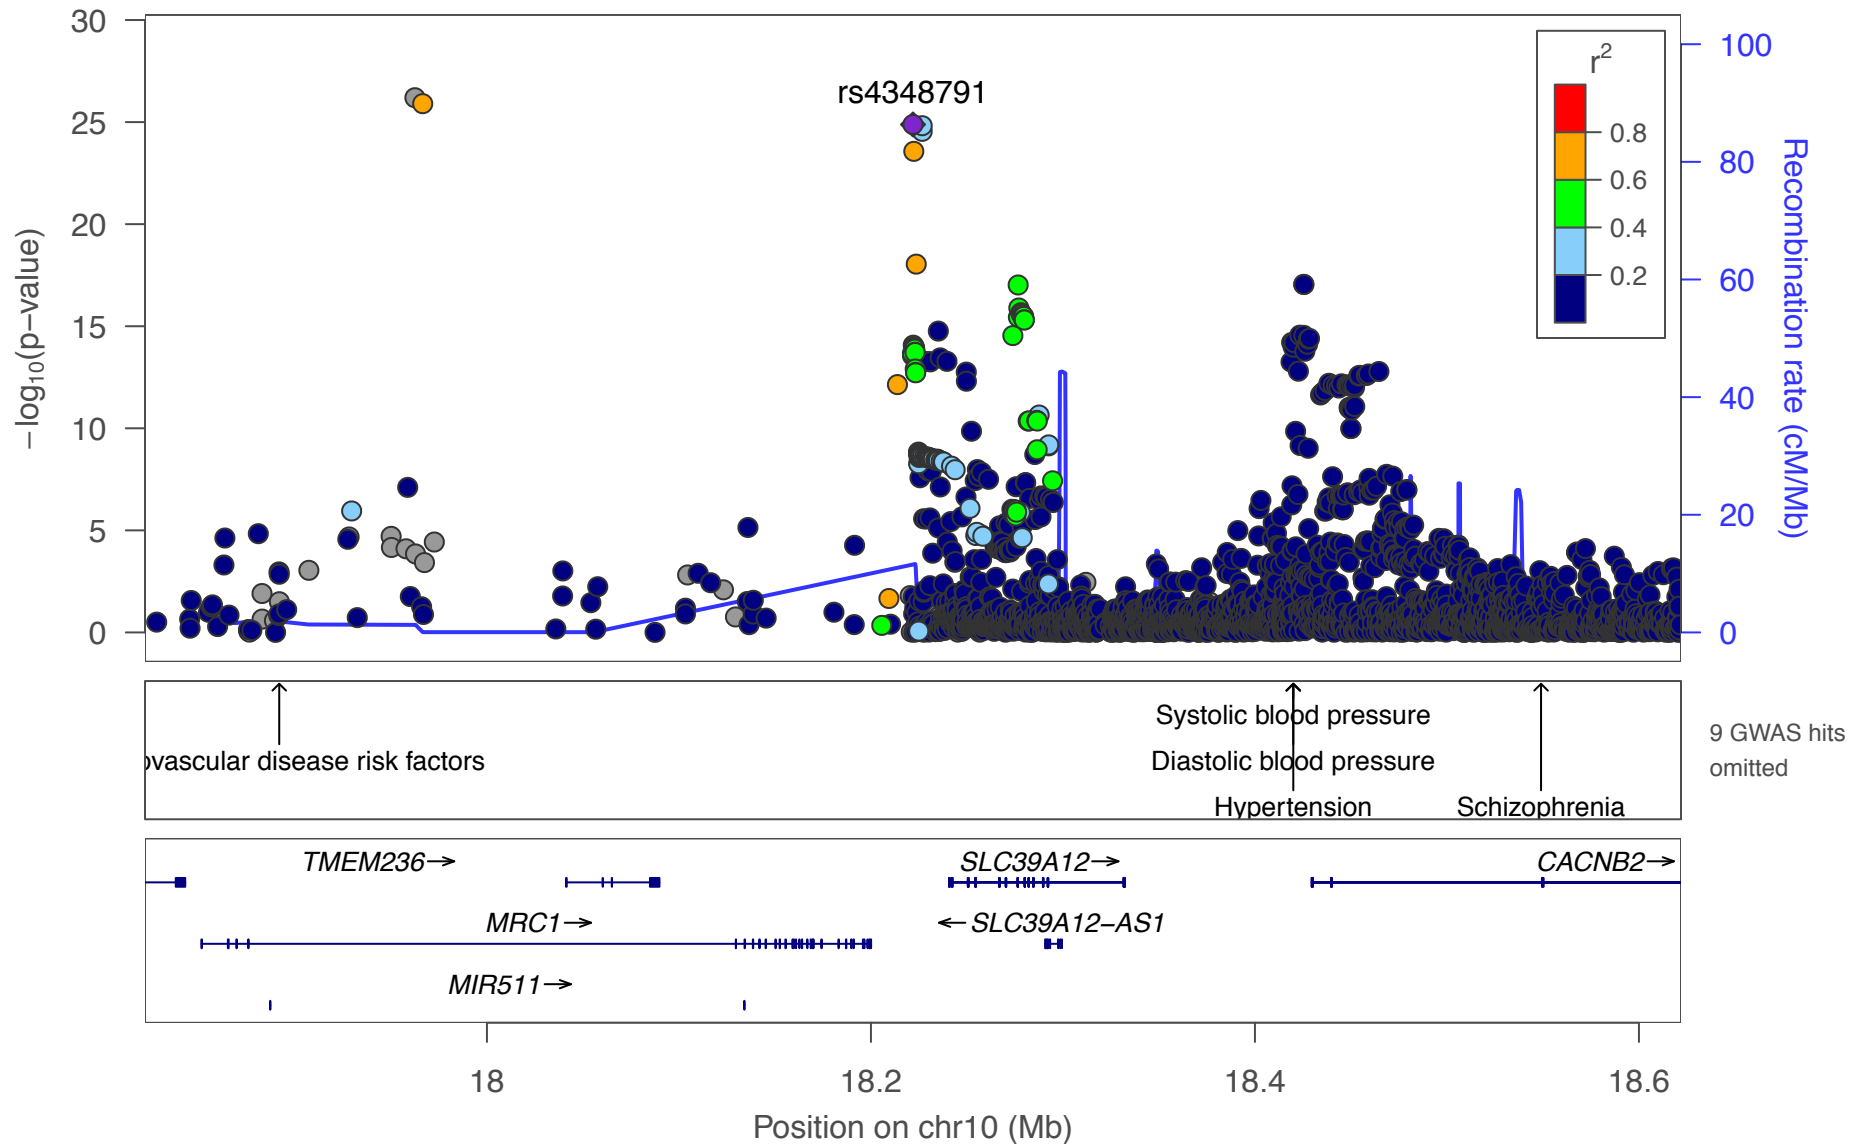

date: Thu Aug 17 18:16:04 2017

build: hg19

display range: chr10:17821908–18621908 [17821908–18621908]

hilite range: 0 – 0 [ 0 – 0 ]

reference SNP: chr10:18221908

number of SNPs plotted: 2678

min P.value: 6.37E–27 [chr10:17962506]

max P.value: 9.99E–1 [chr10:18348597]

omitted GWAS Hits: chr10:18.549016–Schizophrenia, NA

omitted GWAS Hits: NA, NA

omitted GWAS Hits: NA, NA

## GWAS Catalog SNPs in Region

### trait

Hematological and biochemical traits

Cardiovascular disease risk factors

Osteoarthritis biomarkers

Childhood and early adolescence aggressive behavior

Bipolar disorder and schizophrenia

Response to antipsychotic treatment

Systolic blood pressure

Diastolic blood pressure

Hypertension

Primary tooth development (time to first tooth eruption)

Primary tooth development (number of teeth)

Metabolite levels (HVA/MHPG ratio)

Schizophrenia

Autism spectrum disorder, attention deficit–hyperactivity disorder, bipolar disorder, major depressive disorder, and schizophrenia (combined)



# SWI\_T2star\_right\_pallidum

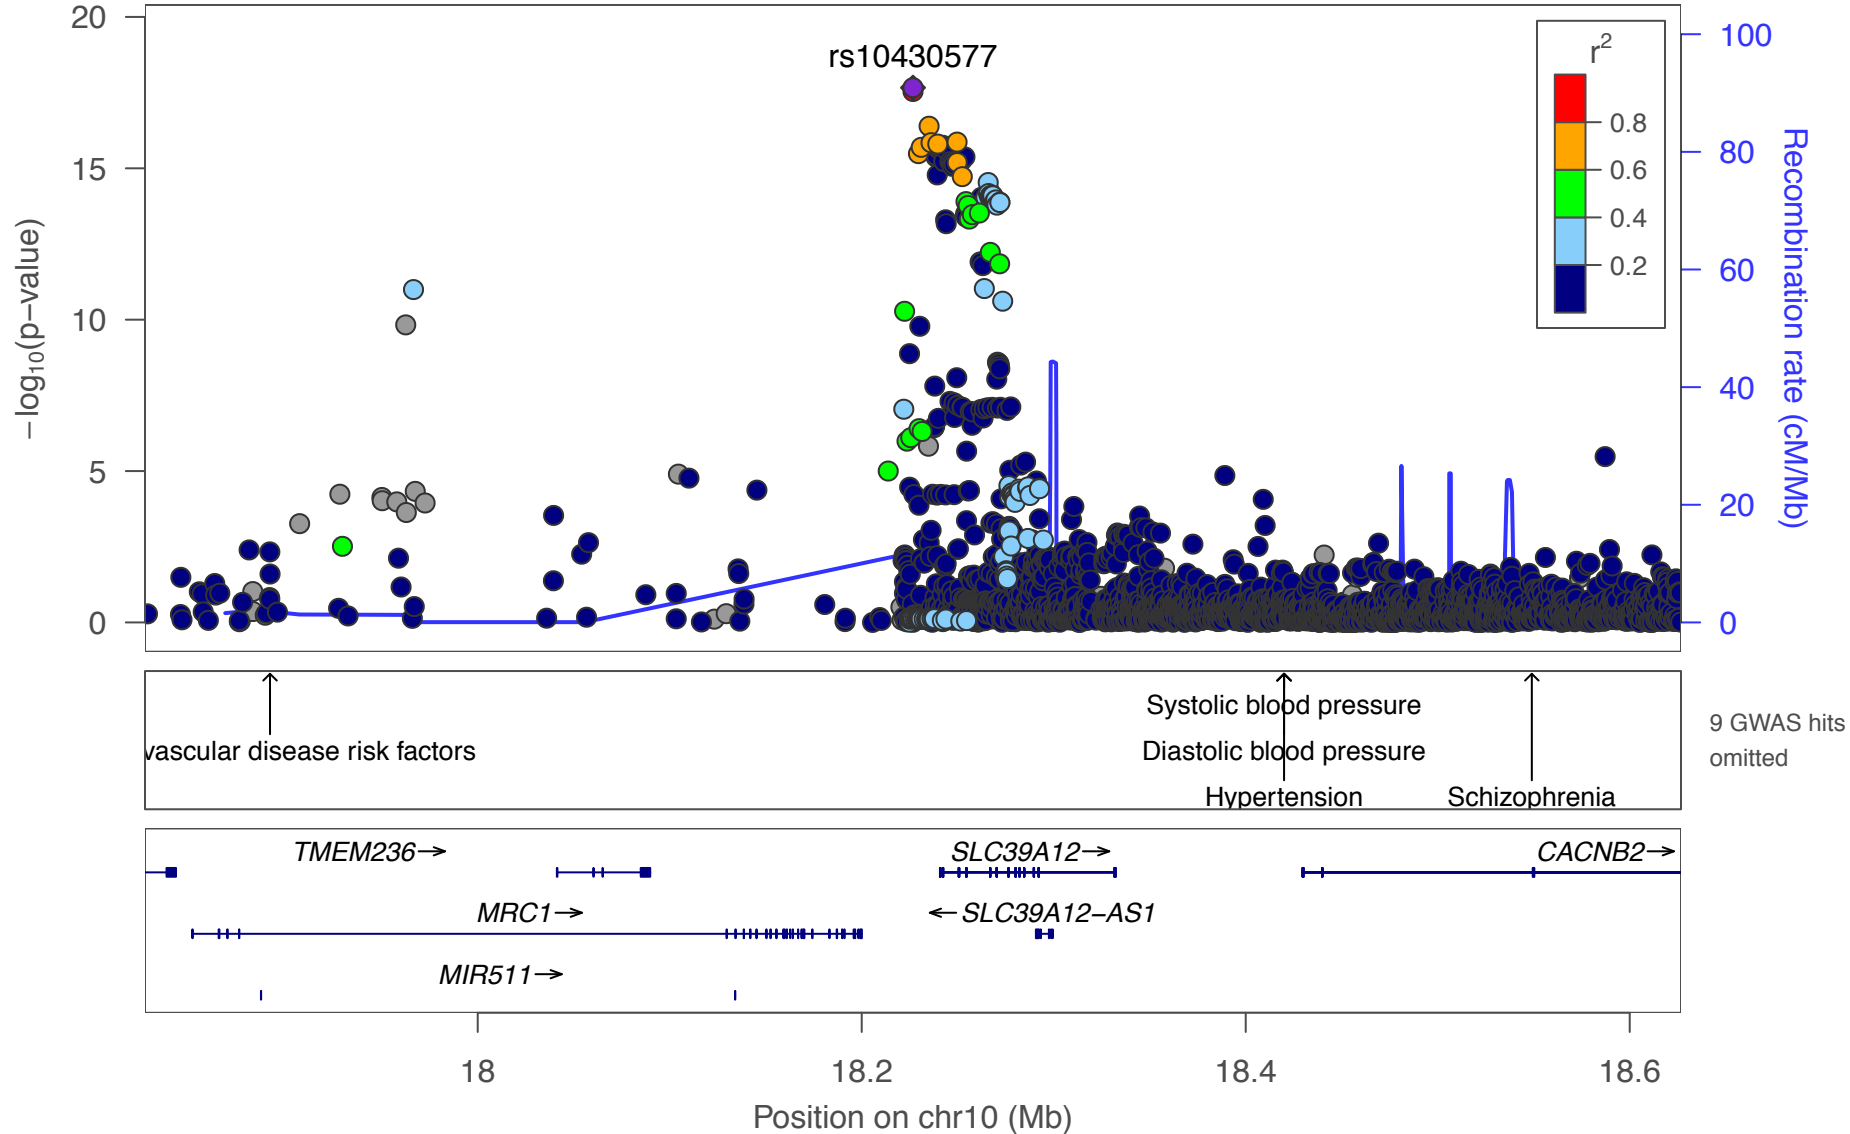

date: Thu Aug 17 18:00:22 2017

build: hg19

display range: chr10:17826707–18626707 [17826707–18626707]

hilite range: 0 – 0 [ 0 – 0 ]

reference SNP: chr10:18226707

number of SNPs plotted: 2697

min P.value: 2.17E–18 [chr10:18226707]

max P.value: 10E–1 [chr10:18456156]

omitted GWAS Hits: chr10:18.549016–Schizophrenia, NA

omitted GWAS Hits: NA, NA

omitted GWAS Hits: NA, NA

## GWAS Catalog SNPs in Region

### trait

Hematological and biochemical traits

Cardiovascular disease risk factors

Osteoarthritis biomarkers

Childhood and early adolescence aggressive behavior

Bipolar disorder and schizophrenia

Response to antipsychotic treatment

Systolic blood pressure

Diastolic blood pressure

Hypertension

Primary tooth development (time to first tooth eruption)

Primary tooth development (number of teeth)

Metabolite levels (HVA/MHPG ratio)

Schizophrenia

Autism spectrum disorder, attention deficit–hyperactivity disorder, bipolar disorder, major depressive disorder, and schizophrenia (combined)

# SWI\_T2star\_left\_pallidum\_plus\_right\_pallidum

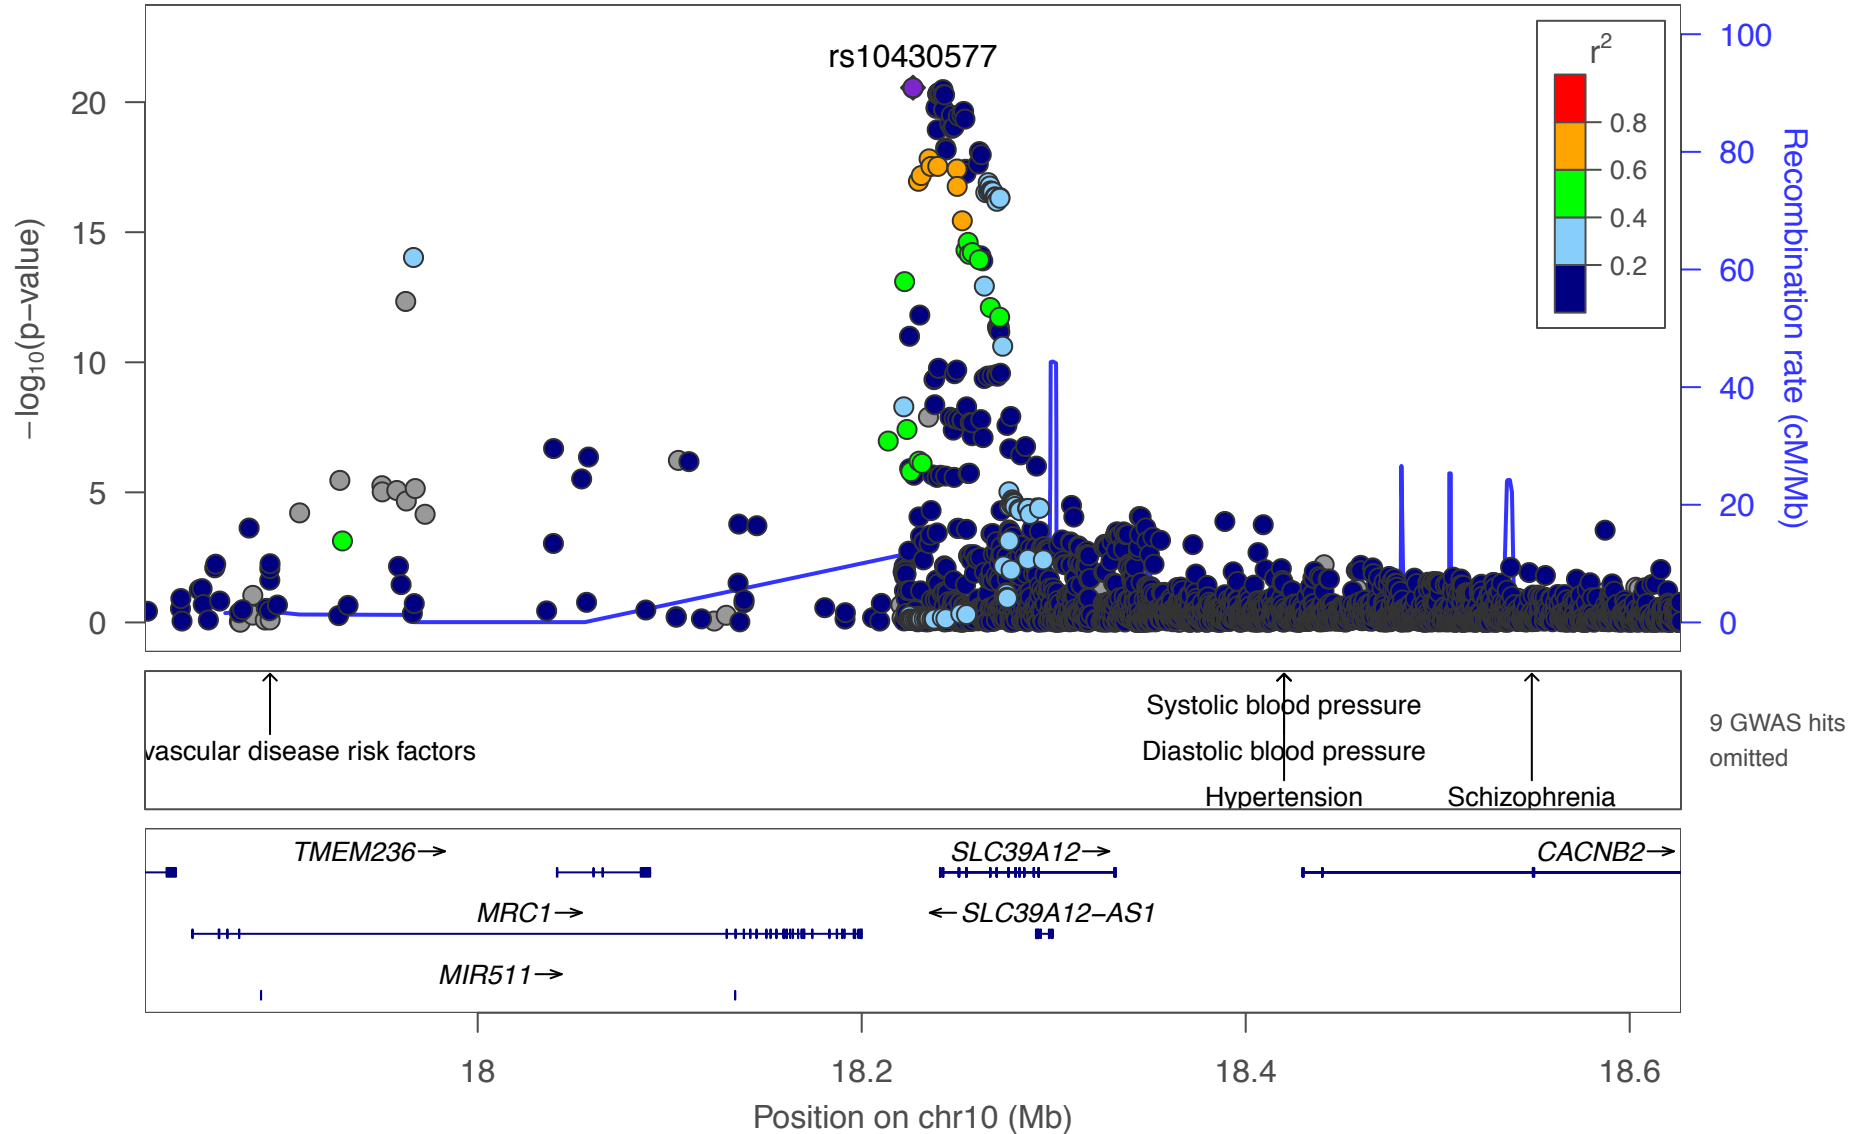

date: Thu Aug 17 18:00:22 2017

build: hg19

display range: chr10:17826707–18626707 [17826707–18626707]

hilite range: 0 – 0 [ 0 – 0 ]

reference SNP: chr10:18226707

number of SNPs plotted: 2697

min P.value: 2.78E–21 [chr10:18226707]

max P.value: 9.99E–1 [chr10:18613497]

omitted GWAS Hits: chr10:18.549016–Schizophrenia, NA

omitted GWAS Hits: NA, NA

omitted GWAS Hits: NA, NA

## GWAS Catalog SNPs in Region

### trait

Hematological and biochemical traits

Cardiovascular disease risk factors

Osteoarthritis biomarkers

Childhood and early adolescence aggressive behavior

Bipolar disorder and schizophrenia

Response to antipsychotic treatment

Systolic blood pressure

Diastolic blood pressure

Hypertension

Primary tooth development (time to first tooth eruption)

Primary tooth development (number of teeth)

Metabolite levels (HVA/MHPG ratio)

Schizophrenia

Autism spectrum disorder, attention deficit–hyperactivity disorder, bipolar disorder, major depressive disorder, and schizophrenia (combined)

# SWI\_T2star\_right\_caudate

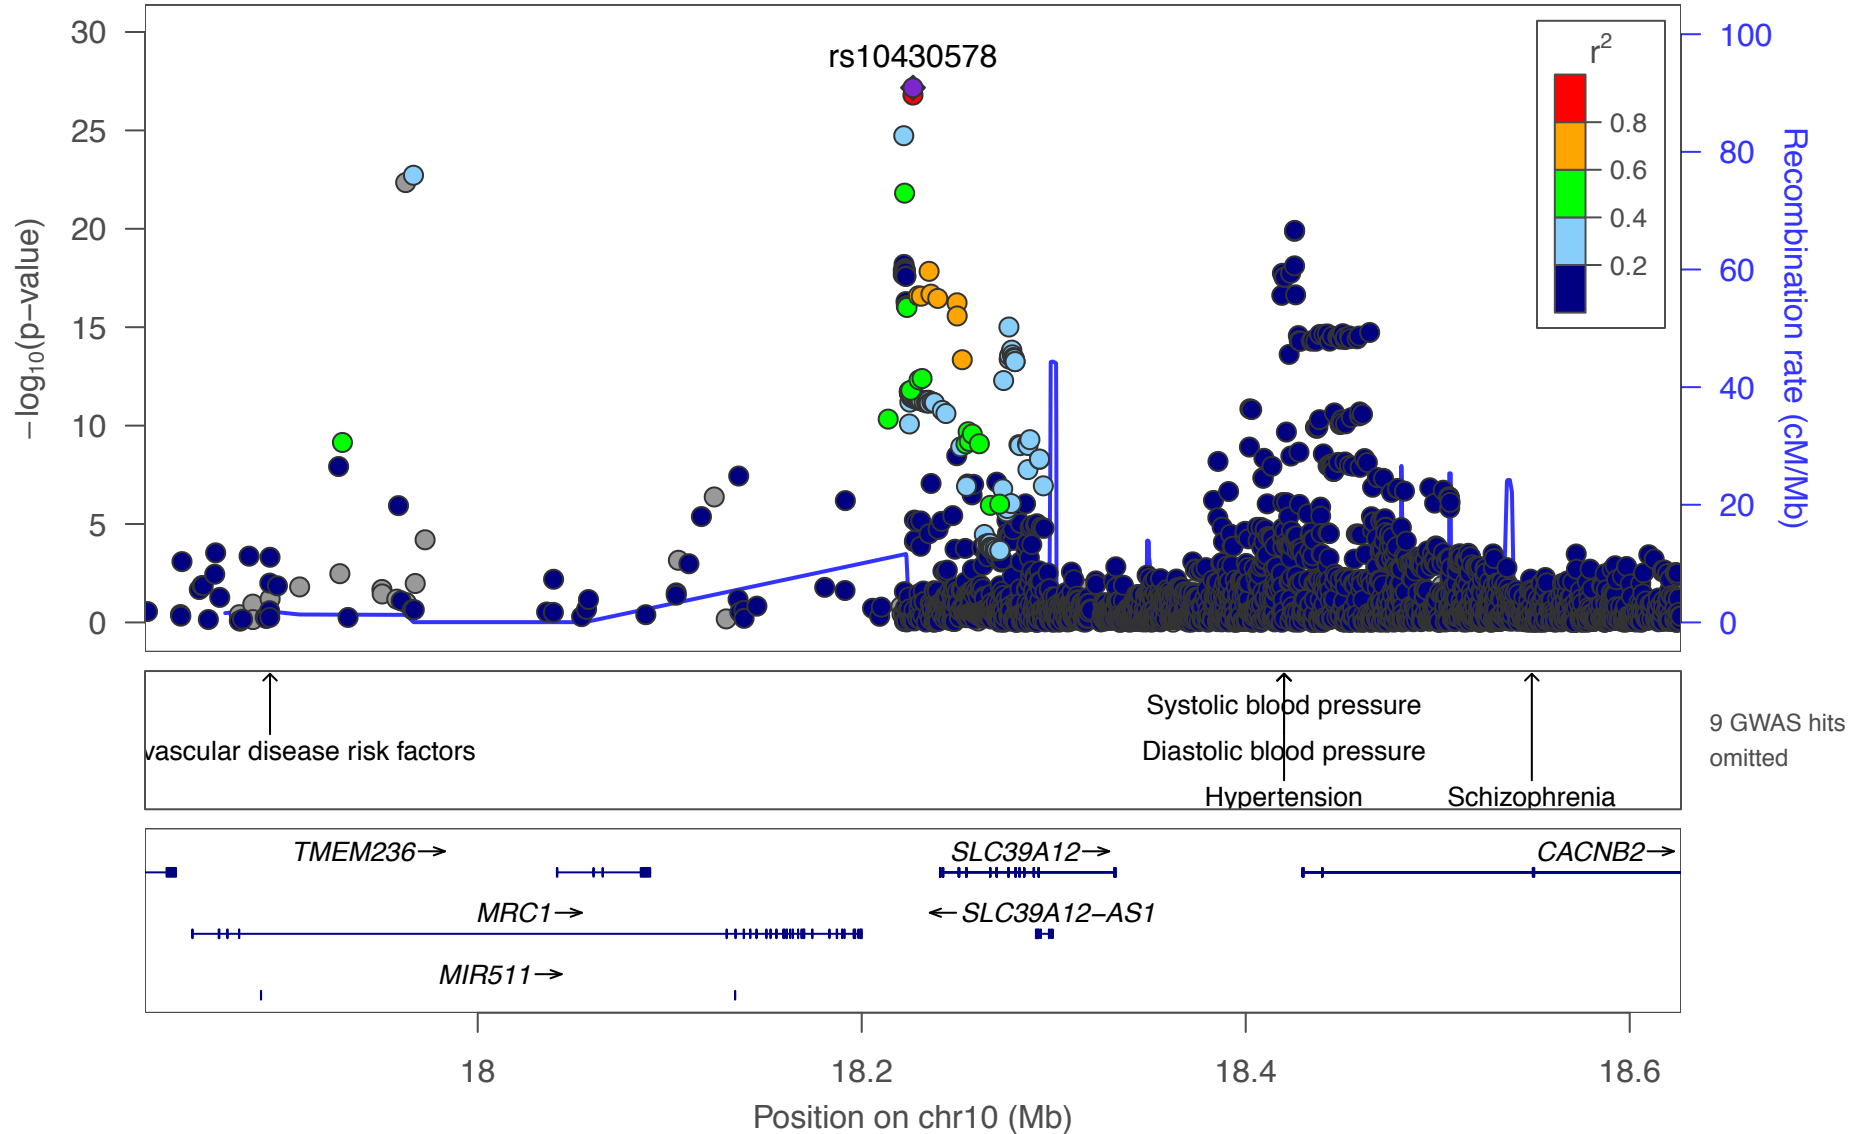

date: Thu Aug 17 18:26:51 2017

build: hg19

display range: chr10:17826714–18626714 [17826714–18626714]

hilite range: 0 – 0 [ 0 – 0 ]

reference SNP: chr10:18226714

number of SNPs plotted: 2697

min P.value: 6.76E–28 [chr10:18226714]

max P.value: 10E–1 [chr10:18624476]

omitted GWAS Hits: chr10:18.549016–Schizophrenia, NA

omitted GWAS Hits: NA, NA

omitted GWAS Hits: NA, NA



## GWAS Catalog SNPs in Region

### trait

Hematological and biochemical traits

Cardiovascular disease risk factors

Osteoarthritis biomarkers

Childhood and early adolescence aggressive behavior

Bipolar disorder and schizophrenia

Response to antipsychotic treatment

Systolic blood pressure

Diastolic blood pressure

Hypertension

Primary tooth development (time to first tooth eruption)

Primary tooth development (number of teeth)

Metabolite levels (HVA/MHPG ratio)

Schizophrenia

Autism spectrum disorder, attention deficit–hyperactivity disorder, bipolar disorder, major depressive disorder, and schizophrenia (combined)

# SWI\_T2star\_left\_putamen

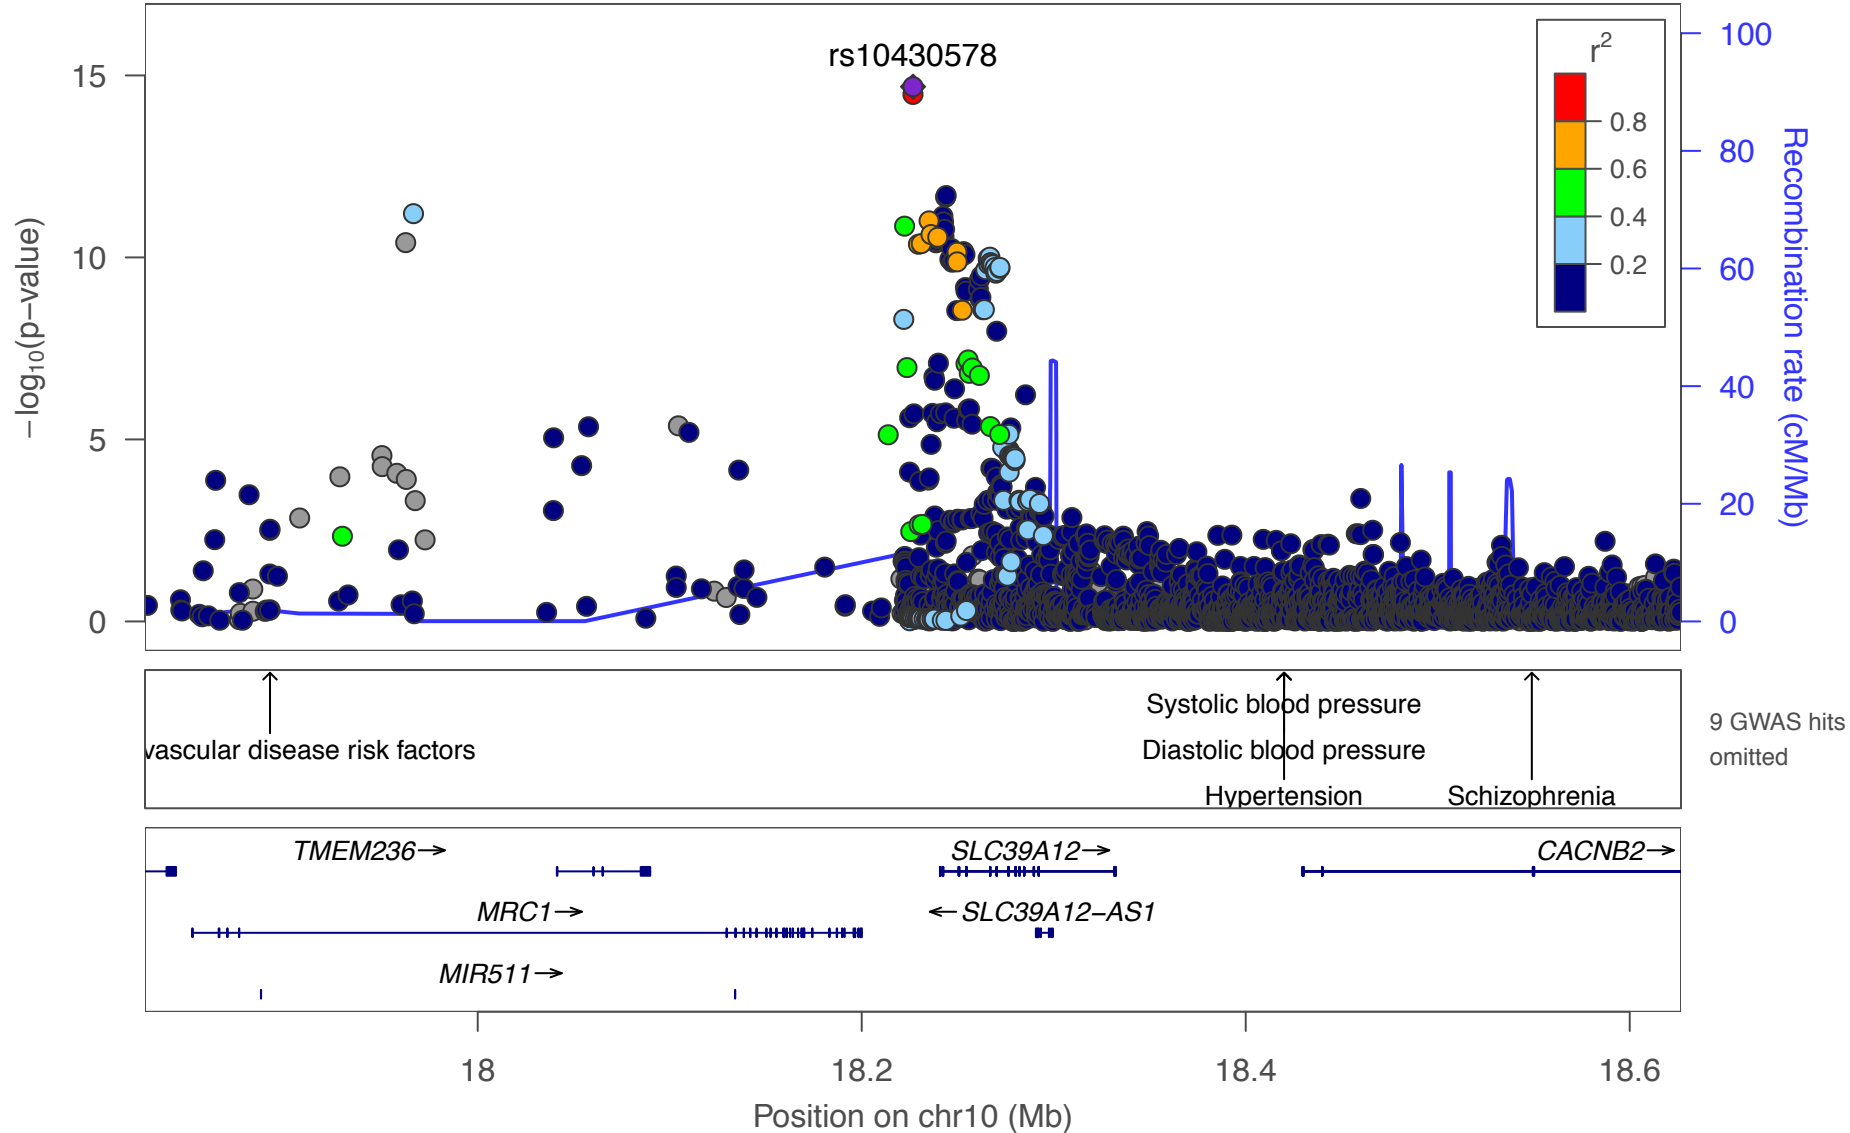

date: Thu Aug 17 18:26:51 2017

build: hg19

display range: chr10:17826714–18626714 [17826714–18626714]

hilite range: 0 – 0 [ 0 – 0 ]

reference SNP: chr10:18226714

number of SNPs plotted: 2697

min P.value: 2.04E–15 [chr10:18226714]

max P.value: 10E–1 [chr10:18571506]

omitted GWAS Hits: chr10:18.549016–Schizophrenia, NA

omitted GWAS Hits: NA, NA

omitted GWAS Hits: NA, NA

## GWAS Catalog SNPs in Region

### trait

Hematological and biochemical traits

Cardiovascular disease risk factors

Osteoarthritis biomarkers

Childhood and early adolescence aggressive behavior

Bipolar disorder and schizophrenia

Response to antipsychotic treatment

Systolic blood pressure

Diastolic blood pressure

Hypertension

Primary tooth development (time to first tooth eruption)

Primary tooth development (number of teeth)

Metabolite levels (HVA/MHPG ratio)

Schizophrenia

Autism spectrum disorder, attention deficit–hyperactivity disorder, bipolar disorder, major depressive disorder, and schizophrenia (combined)

# SWI\_T2star\_right\_putamen

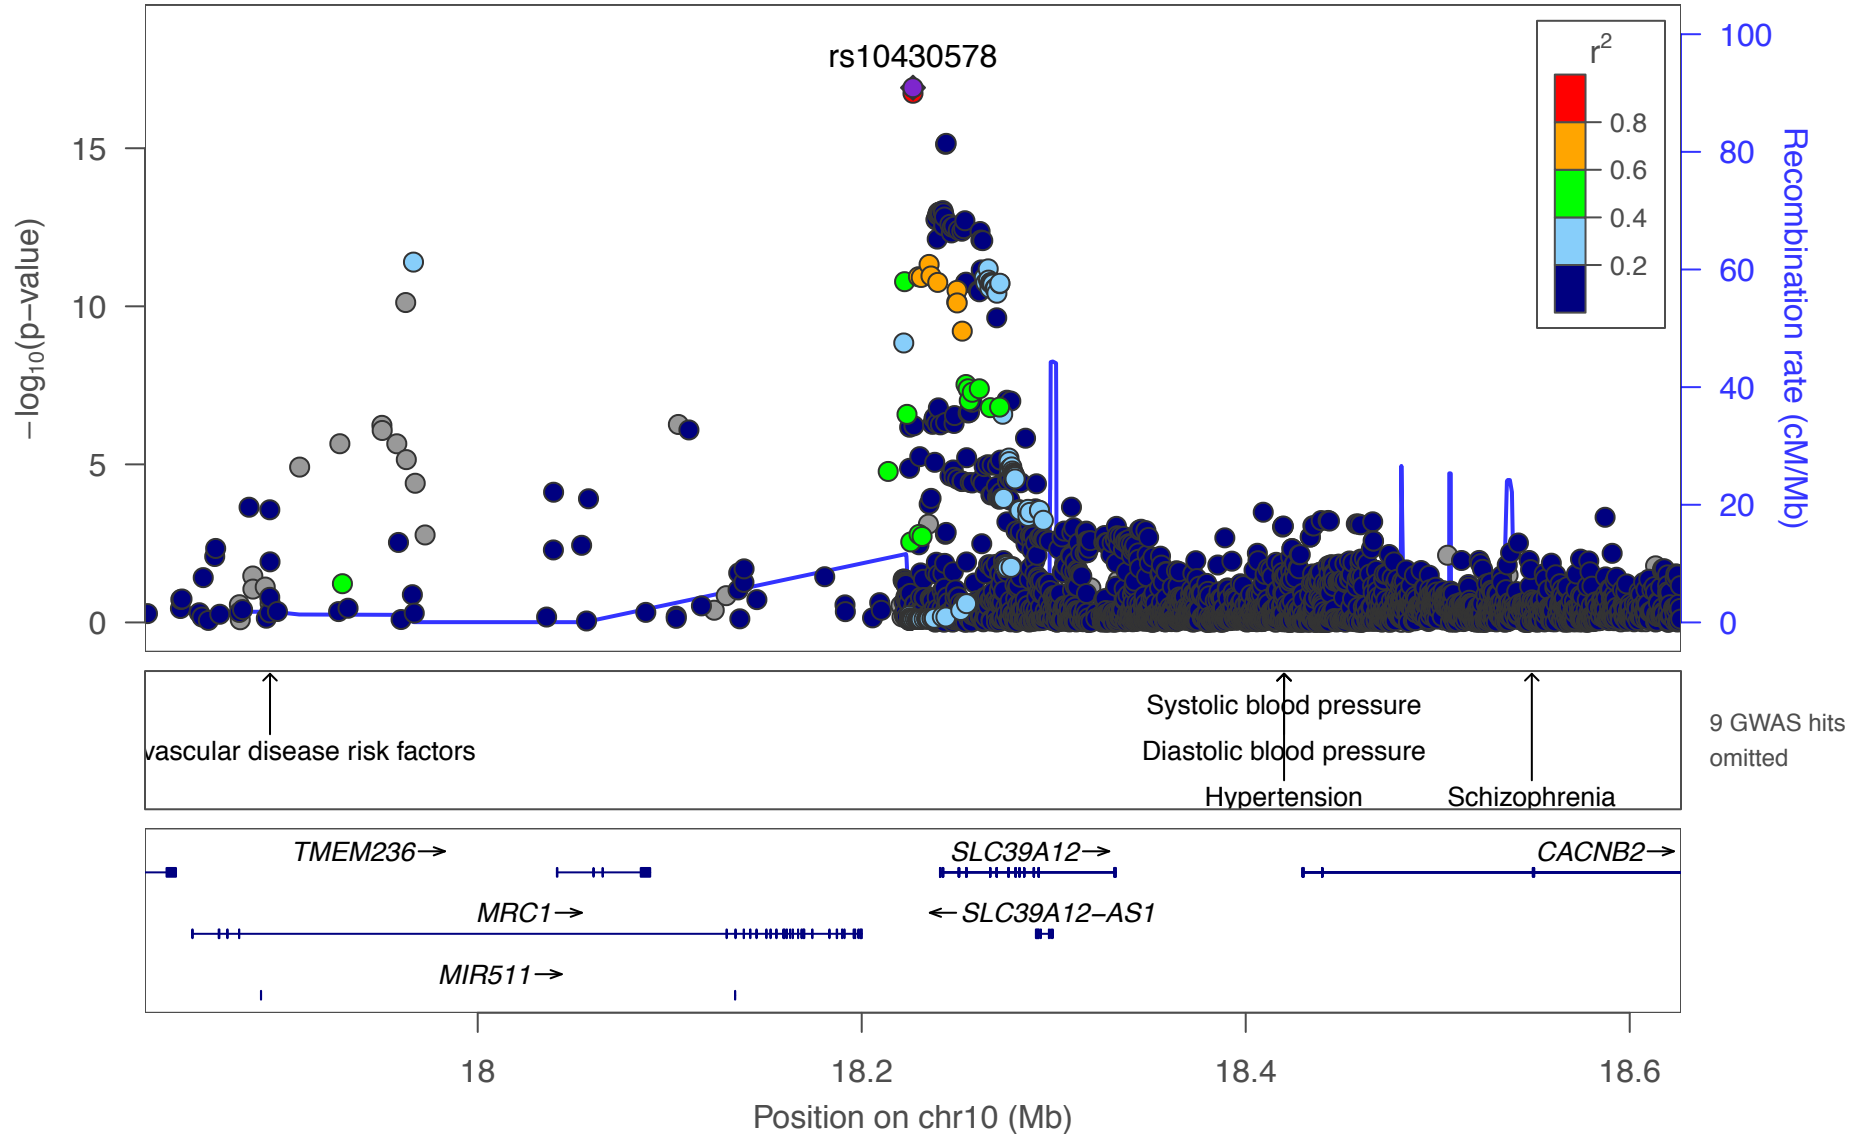

date: Thu Aug 17 18:35:05 2017

build: hg19

display range: chr10:17826714–18626714 [17826714–18626714]

hilite range: 0 – 0 [ 0 – 0 ]

reference SNP: chr10:18226714

number of SNPs plotted: 2697

min P.value: 1.21E–17 [chr10:18226714]

max P.value: 10E–1 [chr10:18577835]

omitted GWAS Hits: chr10:18.549016–Schizophrenia, NA

omitted GWAS Hits: NA, NA

omitted GWAS Hits: NA, NA

## GWAS Catalog SNPs in Region

### trait

Hematological and biochemical traits

Cardiovascular disease risk factors

Osteoarthritis biomarkers

Childhood and early adolescence aggressive behavior

Bipolar disorder and schizophrenia

Response to antipsychotic treatment

Systolic blood pressure

Diastolic blood pressure

Hypertension

Primary tooth development (time to first tooth eruption)

Primary tooth development (number of teeth)

Metabolite levels (HVA/MHPG ratio)

Schizophrenia

Autism spectrum disorder, attention deficit–hyperactivity disorder, bipolar disorder, major depressive disorder, and schizophrenia (combined)

# SWI\_T2star\_left\_caudate\_plus\_right\_caudate

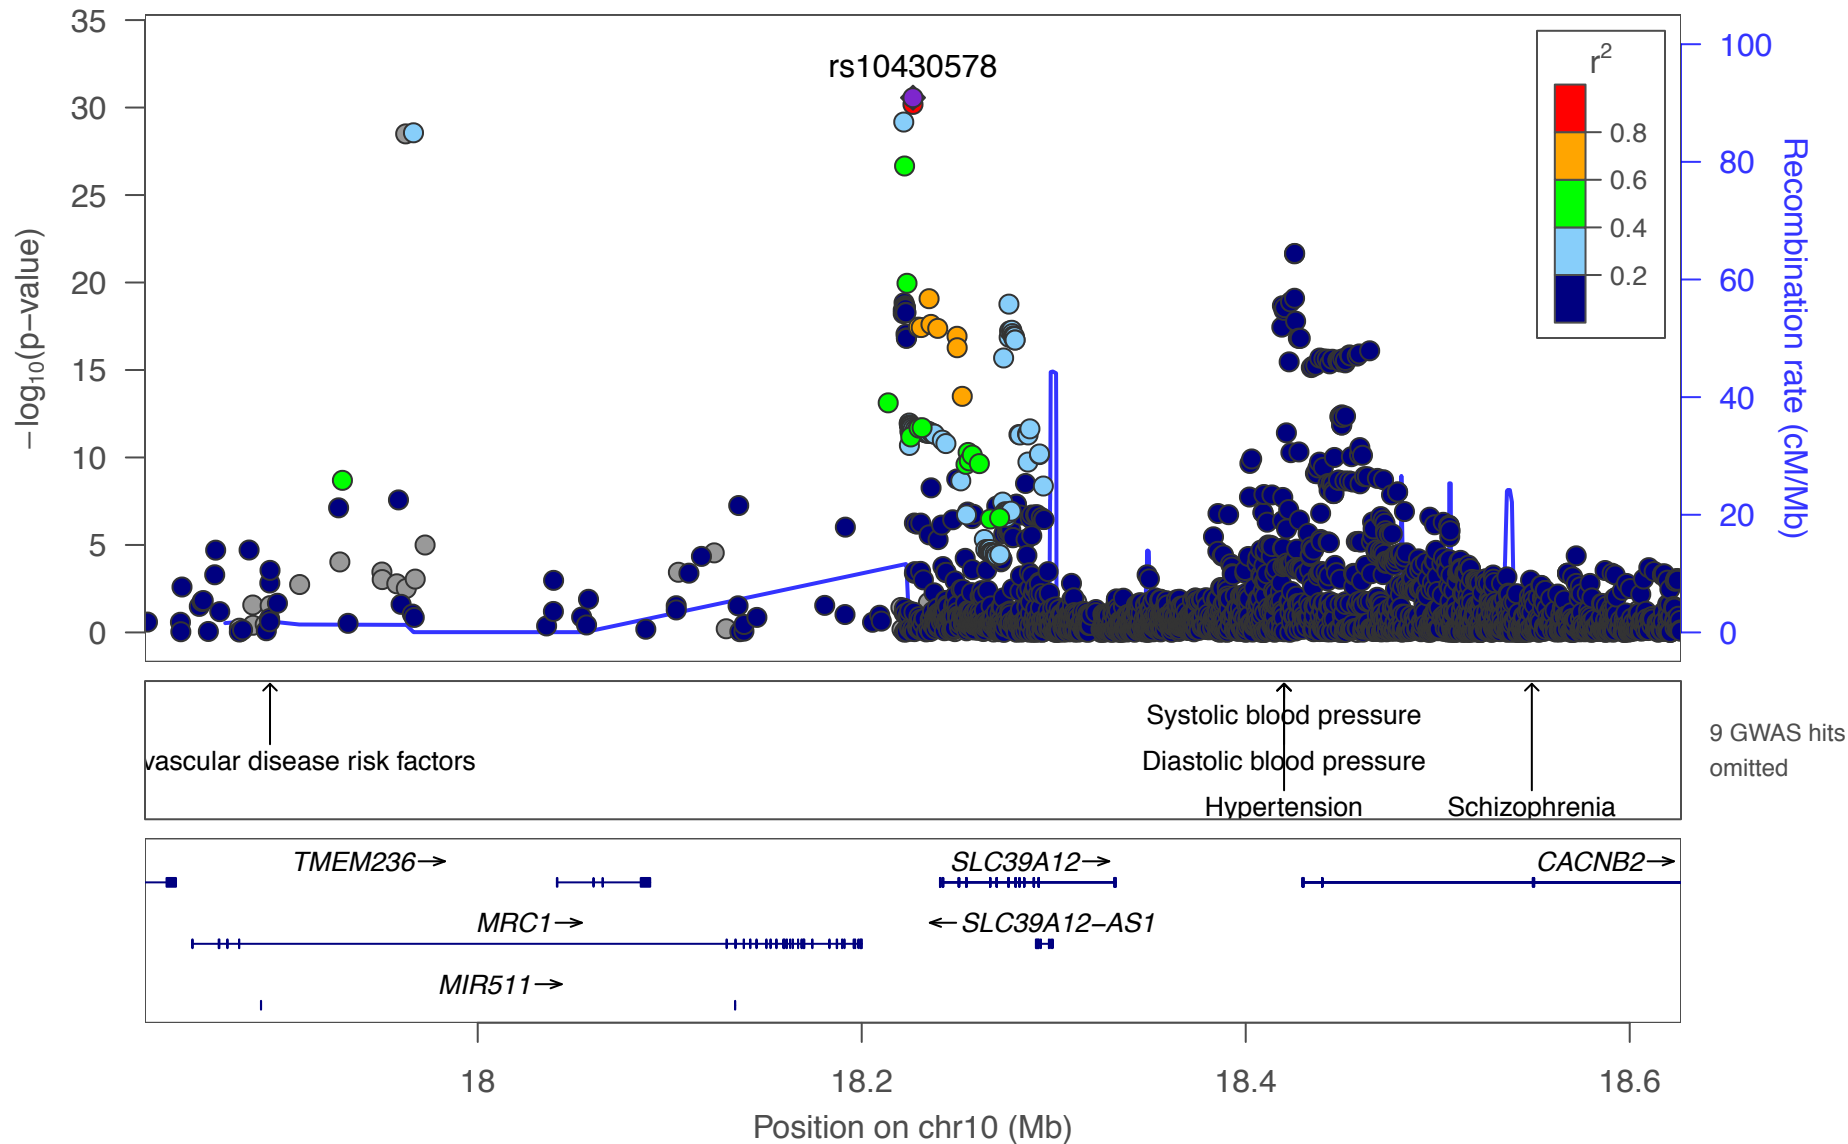



date: Thu Aug 17 18:35:05 2017

build: hg19

display range: chr10:17826714–18626714 [17826714–18626714]

hilite range: 0 – 0 [ 0 – 0 ]

reference SNP: chr10:18226714

number of SNPs plotted: 2697

min P.value: 2.73E–31 [chr10:18226714]

max P.value: 9.98E–1 [chr10:18541427]

omitted GWAS Hits: chr10:18.549016–Schizophrenia, NA

omitted GWAS Hits: NA, NA

omitted GWAS Hits: NA, NA

## GWAS Catalog SNPs in Region

### trait

Hematological and biochemical traits

Cardiovascular disease risk factors

Osteoarthritis biomarkers

Childhood and early adolescence aggressive behavior

Bipolar disorder and schizophrenia

Response to antipsychotic treatment

Systolic blood pressure

Diastolic blood pressure

Hypertension

Primary tooth development (time to first tooth eruption)

Primary tooth development (number of teeth)

Metabolite levels (HVA/MHPG ratio)

Schizophrenia

Autism spectrum disorder, attention deficit–hyperactivity disorder, bipolar disorder, major depressive disorder, and schizophrenia (combined)

# SWI\_T2star\_left\_putamen\_plus\_right\_putamen

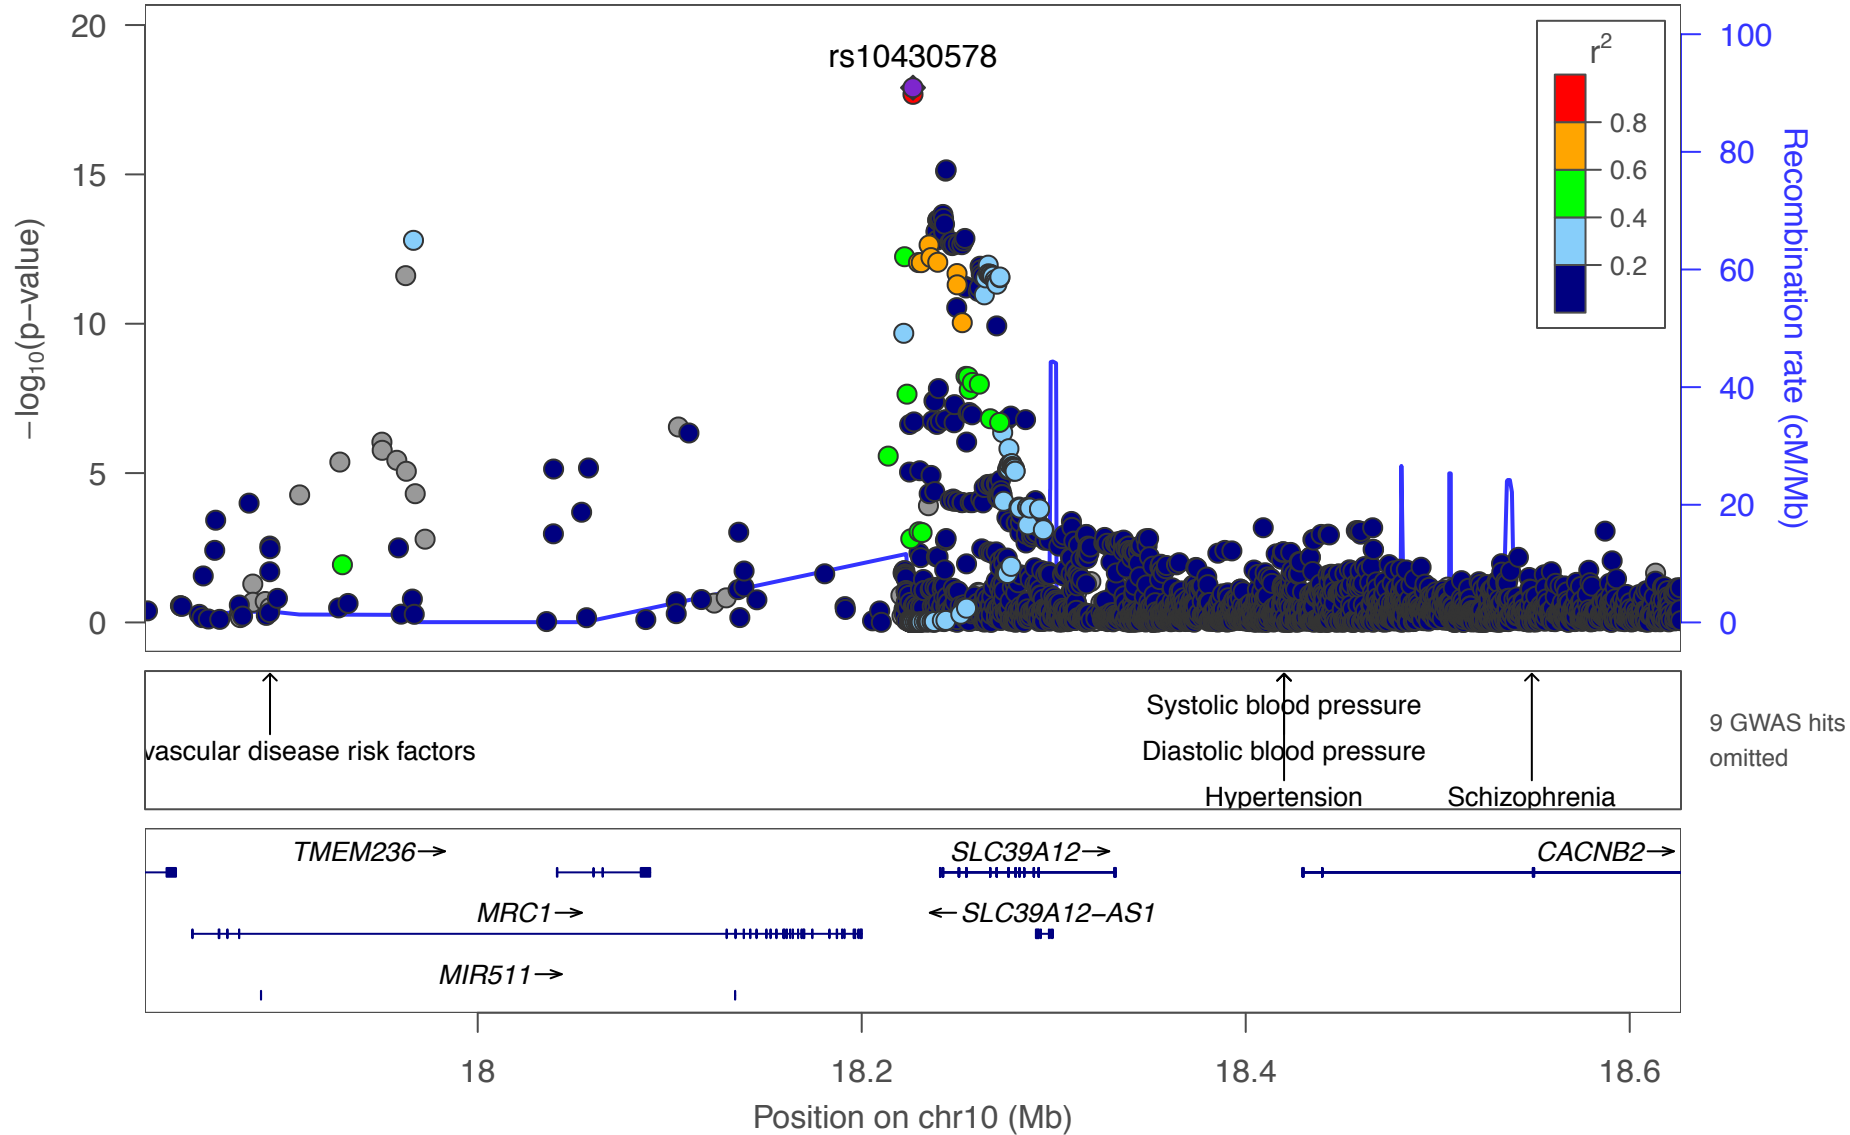

date: Thu Aug 17 18:35:05 2017

build: hg19

display range: chr10:17826714–18626714 [17826714–18626714]

hilite range: 0 – 0 [ 0 – 0 ]

reference SNP: chr10:18226714

number of SNPs plotted: 2697

min P.value: 1.25E–18 [chr10:18226714]

max P.value: 9.99E–1 [chr10:18339376]

omitted GWAS Hits: chr10:18.549016–Schizophrenia, NA

omitted GWAS Hits: NA, NA

omitted GWAS Hits: NA, NA

## GWAS Catalog SNPs in Region

### trait

Hematological and biochemical traits

Cardiovascular disease risk factors

Osteoarthritis biomarkers

Childhood and early adolescence aggressive behavior

Bipolar disorder and schizophrenia

Response to antipsychotic treatment

Systolic blood pressure

Diastolic blood pressure

Hypertension

Primary tooth development (time to first tooth eruption)

Primary tooth development (number of teeth)

Metabolite levels (HVA/MHPG ratio)

Schizophrenia

Autism spectrum disorder, attention deficit–hyperactivity disorder, bipolar disorder, major depressive disorder, and schizophrenia (combined)

# SWI\_T2star\_left\_pallidum

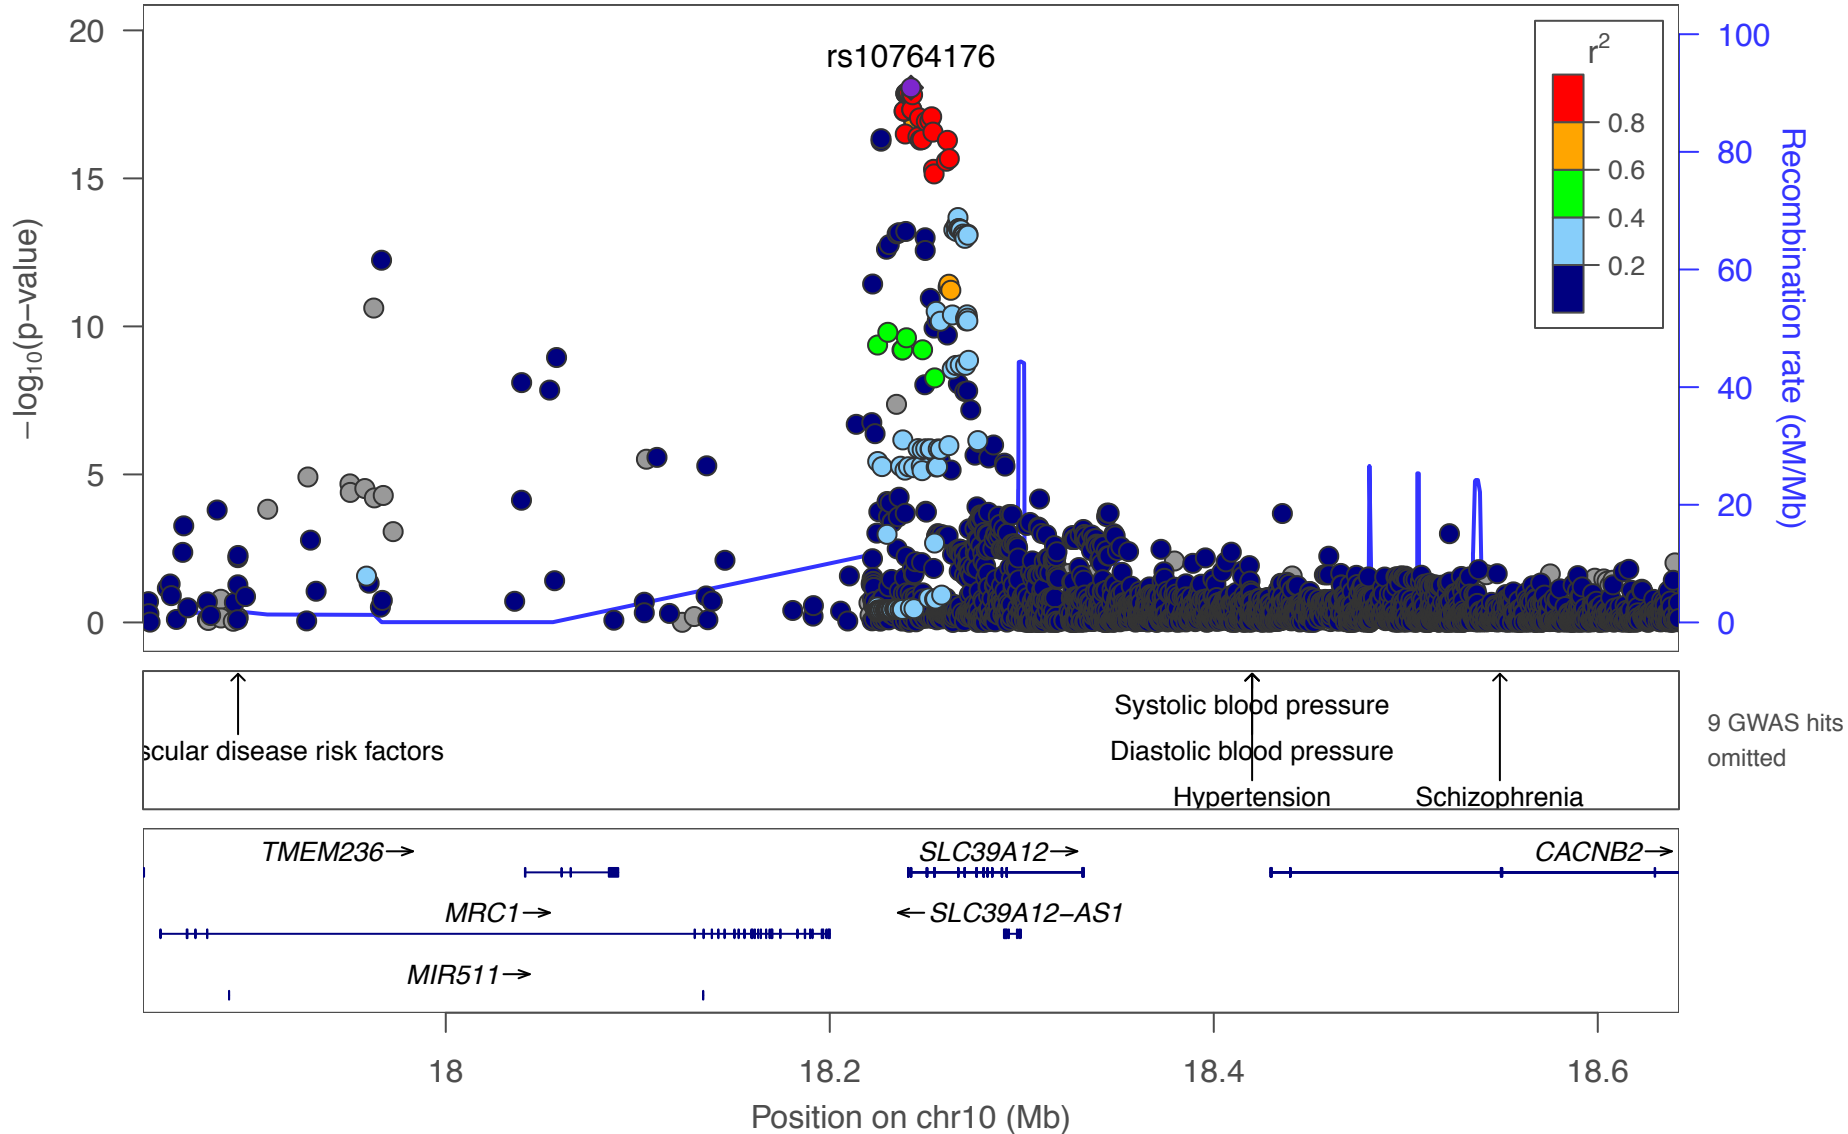

date: Thu Aug 17 18:32:35 2017

build: hg19

display range: chr10:17842311–18642311 [17842311–18642311]

hilite range: 0 – 0 [ 0 – 0 ]

reference SNP: chr10:18242311

number of SNPs plotted: 2775

min P.value: 8.63E–19 [chr10:18242311]

max P.value: 9.99E–1 [chr10:18559835]

omitted GWAS Hits: chr10:18.549016–Schizophrenia, NA

omitted GWAS Hits: NA, NA

omitted GWAS Hits: NA, NA

## GWAS Catalog SNPs in Region

### trait

Hematological and biochemical traits

Cardiovascular disease risk factors

Osteoarthritis biomarkers

Childhood and early adolescence aggressive behavior

Bipolar disorder and schizophrenia

Response to antipsychotic treatment

Systolic blood pressure

Diastolic blood pressure

Hypertension

Primary tooth development (time to first tooth eruption)

Primary tooth development (number of teeth)

Metabolite levels (HVA/MHPG ratio)

Schizophrenia

Autism spectrum disorder, attention deficit–hyperactivity disorder, bipolar disorder, major depressive disorder, and schizophrenia (combined)



# SWI\_T2star\_left\_caudate

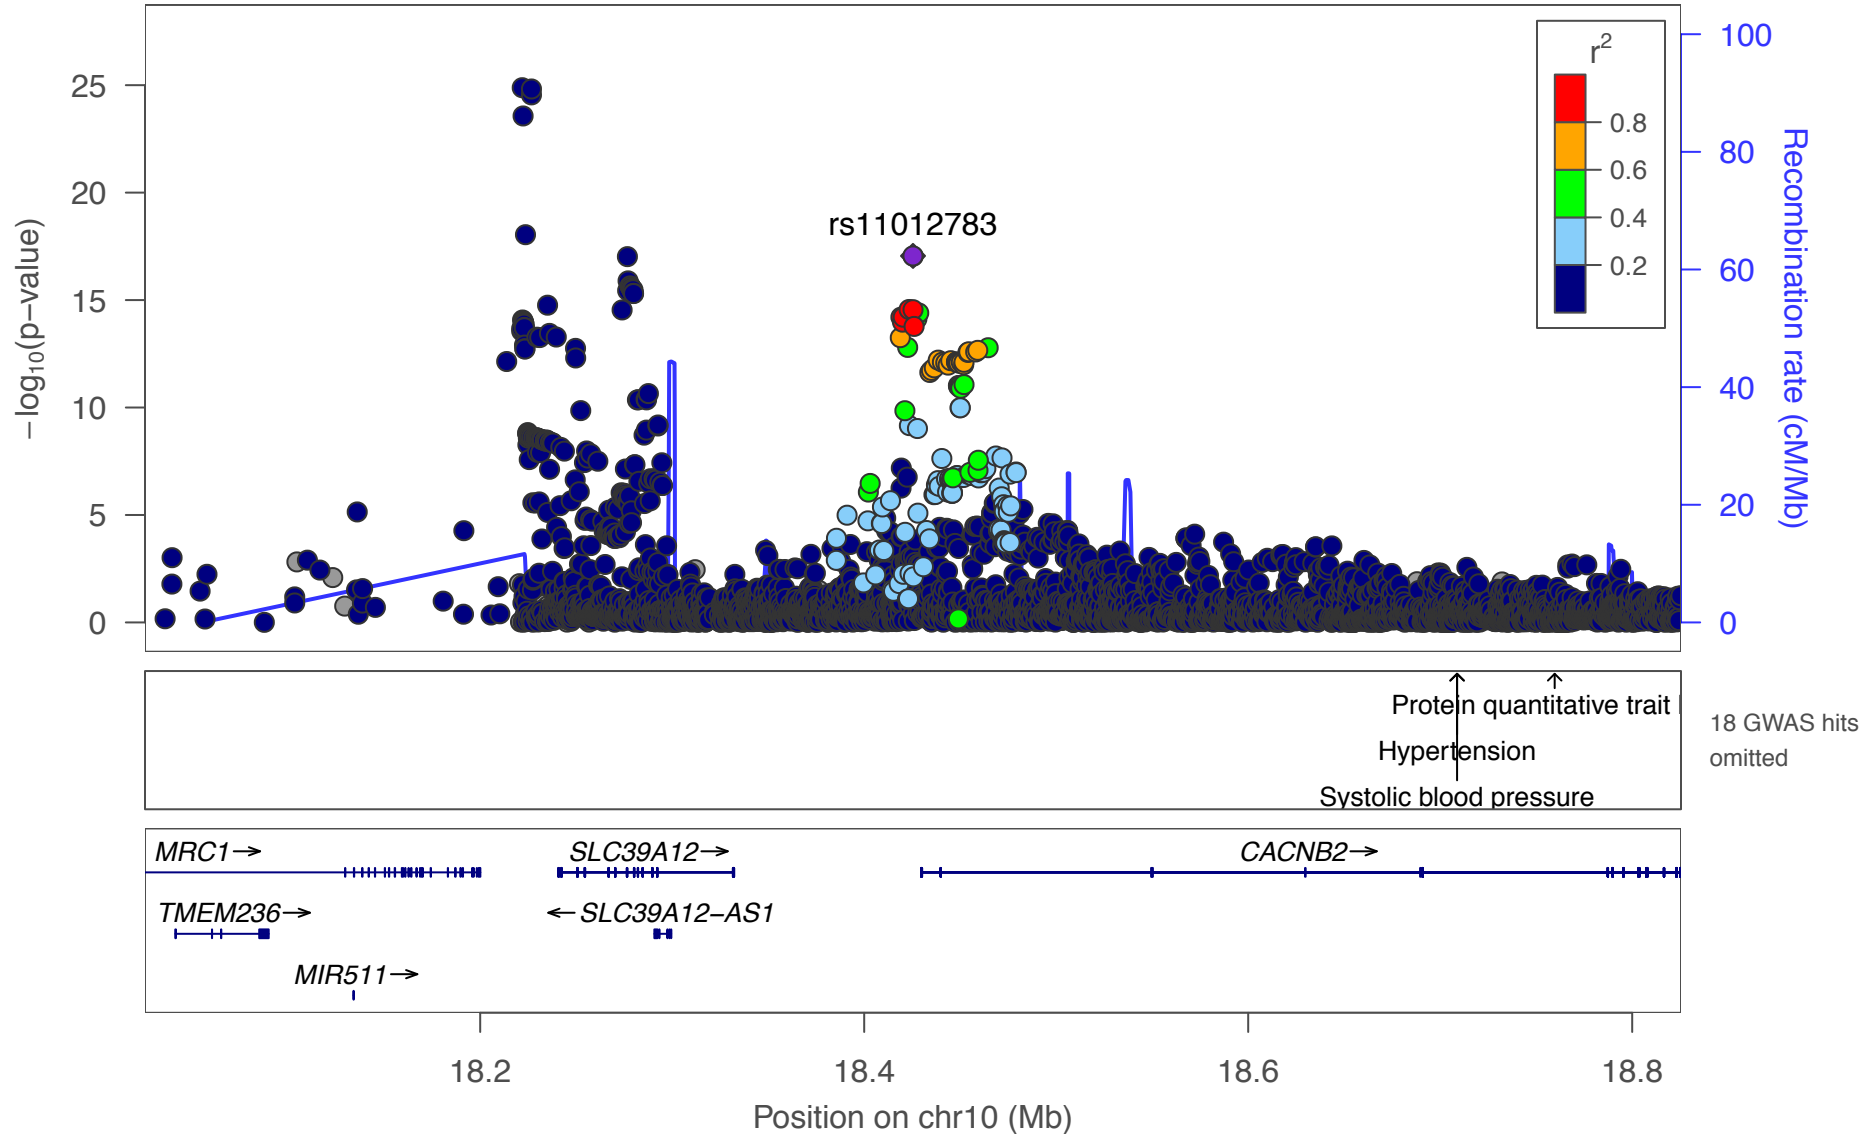

date: Thu Aug 17 18:46:01 2017

build: hg19

display range: chr10:18025418–18825418 [18025418–18825418]

hilite range: 0 – 0 [ 0 – 0 ]

reference SNP: chr10:18425418

number of SNPs plotted: 3878

min P.value: 1.31E–25 [chr10:18221908]

max P.value: 10E–1 [chr10:18761474]

omitted GWAS Hits: NA, NA

## GWAS Catalog SNPs in Region

### trait

Bipolar disorder and schizophrenia

Response to antipsychotic treatment

Systolic blood pressure

Diastolic blood pressure

Hypertension

Primary tooth development (time to first tooth eruption)

Primary tooth development (number of teeth)

Metabolite levels (HVA/MHPG ratio)

Schizophrenia

Autism spectrum disorder, attention deficit–hyperactivity disorder, bipolar disorder, major depressive disorder, and schizophrenia (combined)

QRS complex (Sokolow–Lyon)

Hypertension

Systolic blood pressure

Diastolic blood pressure

Blood pressure

Small vessel stroke

Quantitative traits

Schizophrenia

Schizophrenia

Protein quantitative trait loci

Obesity–related traits

# SWI\_T2star\_right\_caudate

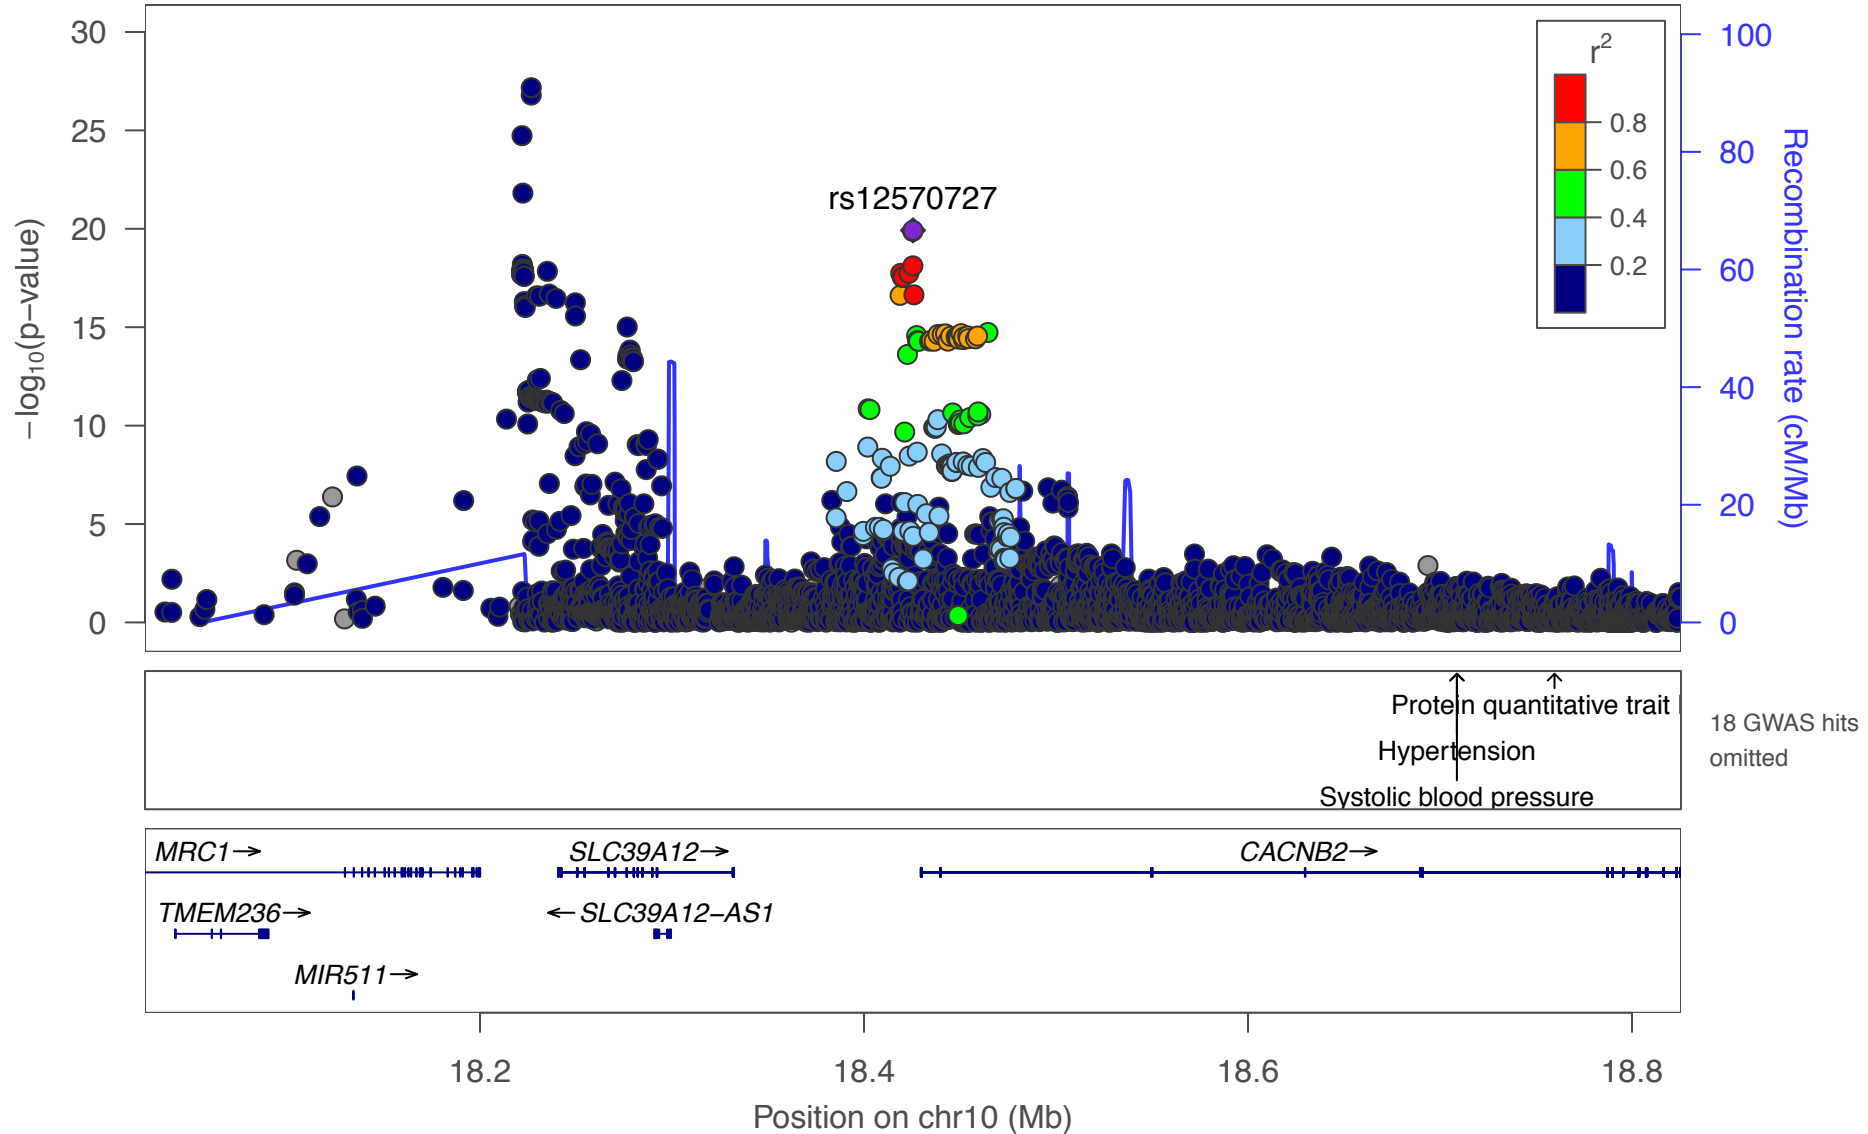

date: Thu Aug 17 18:46:01 2017

build: hg19

display range: chr10:18025519–18825519 [18025519–18825519]

hilite range: 0 – 0 [ 0 – 0 ]

reference SNP: chr10:18425519

number of SNPs plotted: 3878

min P.value: 6.76E–28 [chr10:18226714]

max P.value: 10E–1 [chr10:18624476]

omitted GWAS Hits: NA, NA

## GWAS Catalog SNPs in Region

### trait

Bipolar disorder and schizophrenia

Response to antipsychotic treatment

Systolic blood pressure

Diastolic blood pressure

Hypertension

Primary tooth development (time to first tooth eruption)

Primary tooth development (number of teeth)

Metabolite levels (HVA/MHPG ratio)

Schizophrenia

Autism spectrum disorder, attention deficit–hyperactivity disorder, bipolar disorder, major depressive disorder, and schizophrenia (combined)

QRS complex (Sokolow–Lyon)

Hypertension

Systolic blood pressure

Diastolic blood pressure

Blood pressure

Small vessel stroke

Quantitative traits

Schizophrenia

Schizophrenia

Protein quantitative trait loci

Obesity–related traits

# SWI\_T2star\_left\_caudate\_plus\_right\_caudate

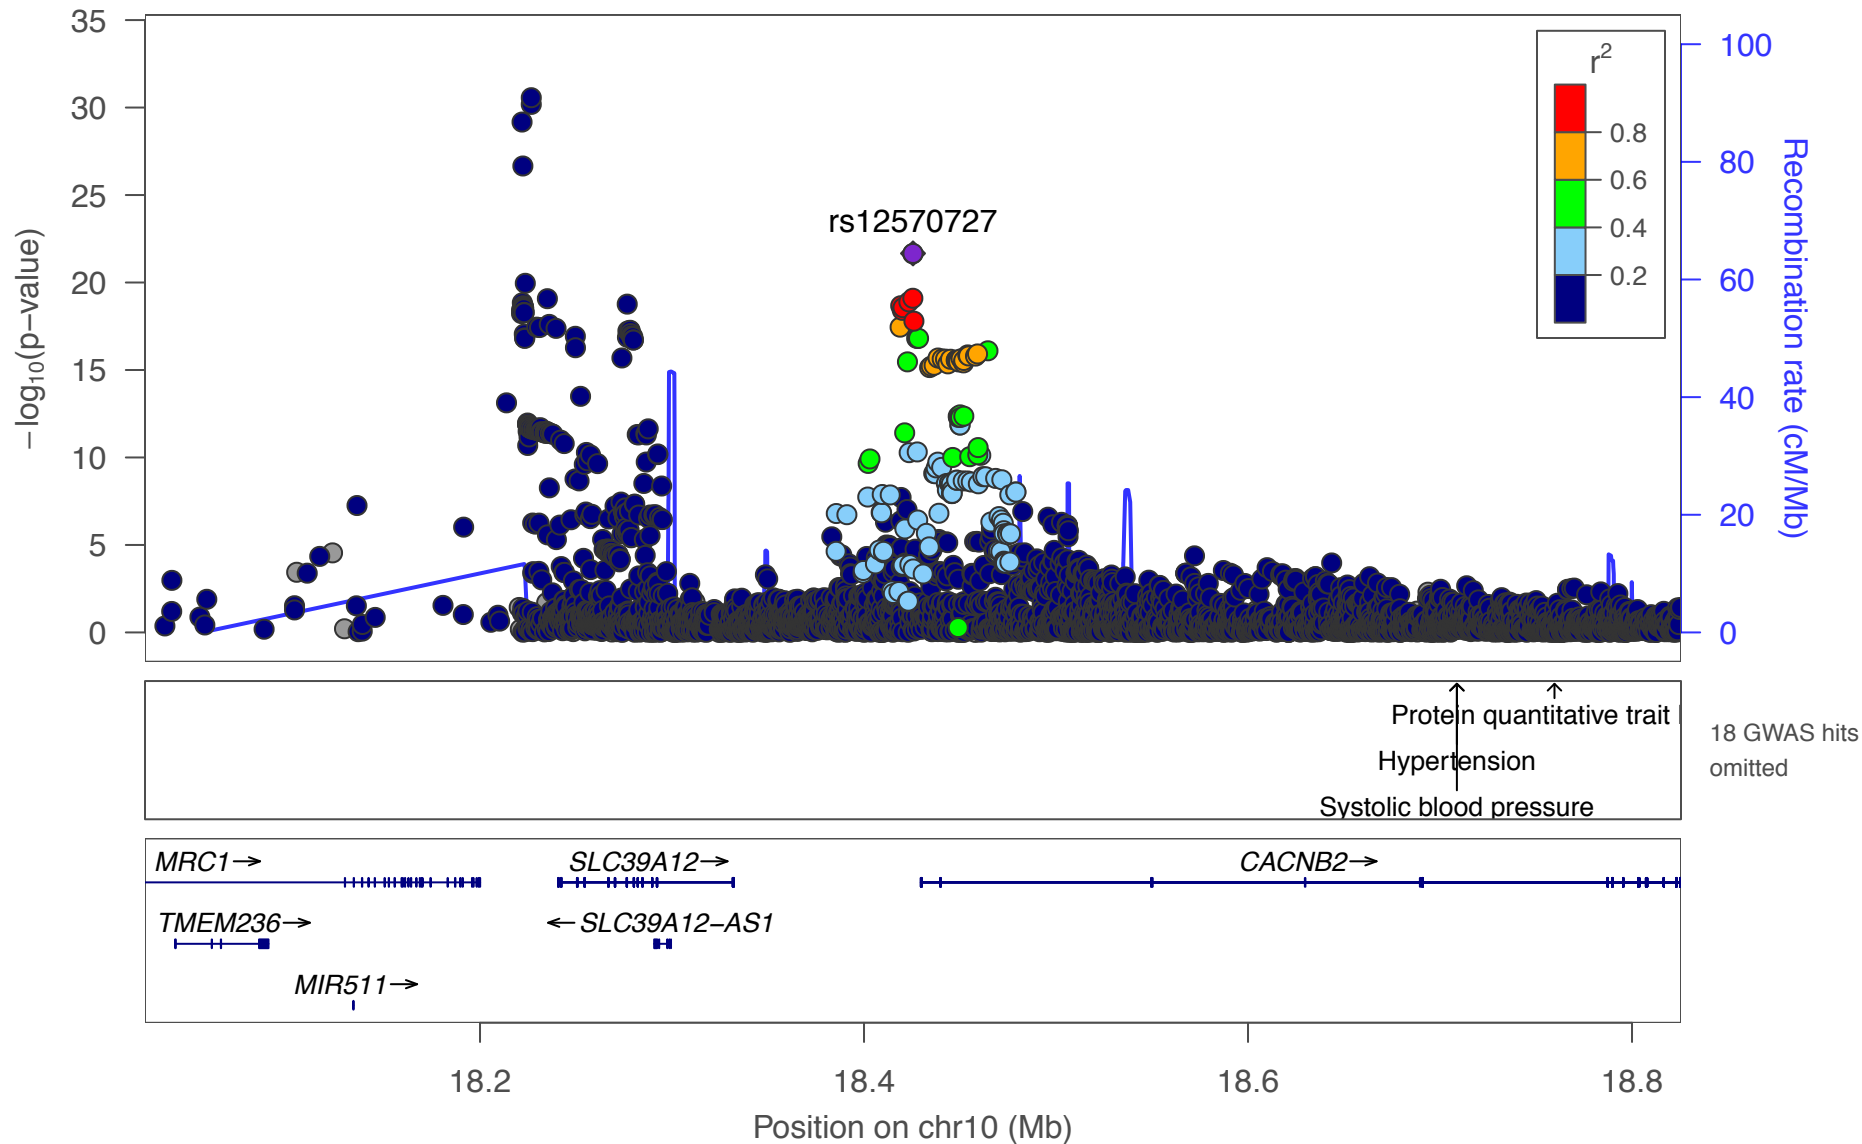

date: Thu Aug 17 18:44:47 2017

build: hg19

display range: chr10:18025519–18825519 [18025519–18825519]

hilite range: 0 – 0 [ 0 – 0 ]

reference SNP: chr10:18425519

number of SNPs plotted: 3878

min P.value: 2.73E–31 [chr10:18226714]

max P.value: 10E–1 [chr10:18781803]

omitted GWAS Hits: NA, NA



## GWAS Catalog SNPs in Region

### trait

Bipolar disorder and schizophrenia

Response to antipsychotic treatment

Systolic blood pressure

Diastolic blood pressure

Hypertension

Primary tooth development (time to first tooth eruption)

Primary tooth development (number of teeth)

Metabolite levels (HVA/MHPG ratio)

Schizophrenia

Autism spectrum disorder, attention deficit–hyperactivity disorder, bipolar disorder, major depressive disorder, and schizophrenia (combined)

QRS complex (Sokolow–Lyon)

Hypertension

Systolic blood pressure

Diastolic blood pressure

Blood pressure

Small vessel stroke

Quantitative traits

Schizophrenia

Schizophrenia

Protein quantitative trait loci

Obesity–related traits

# NODEamps25\_0007

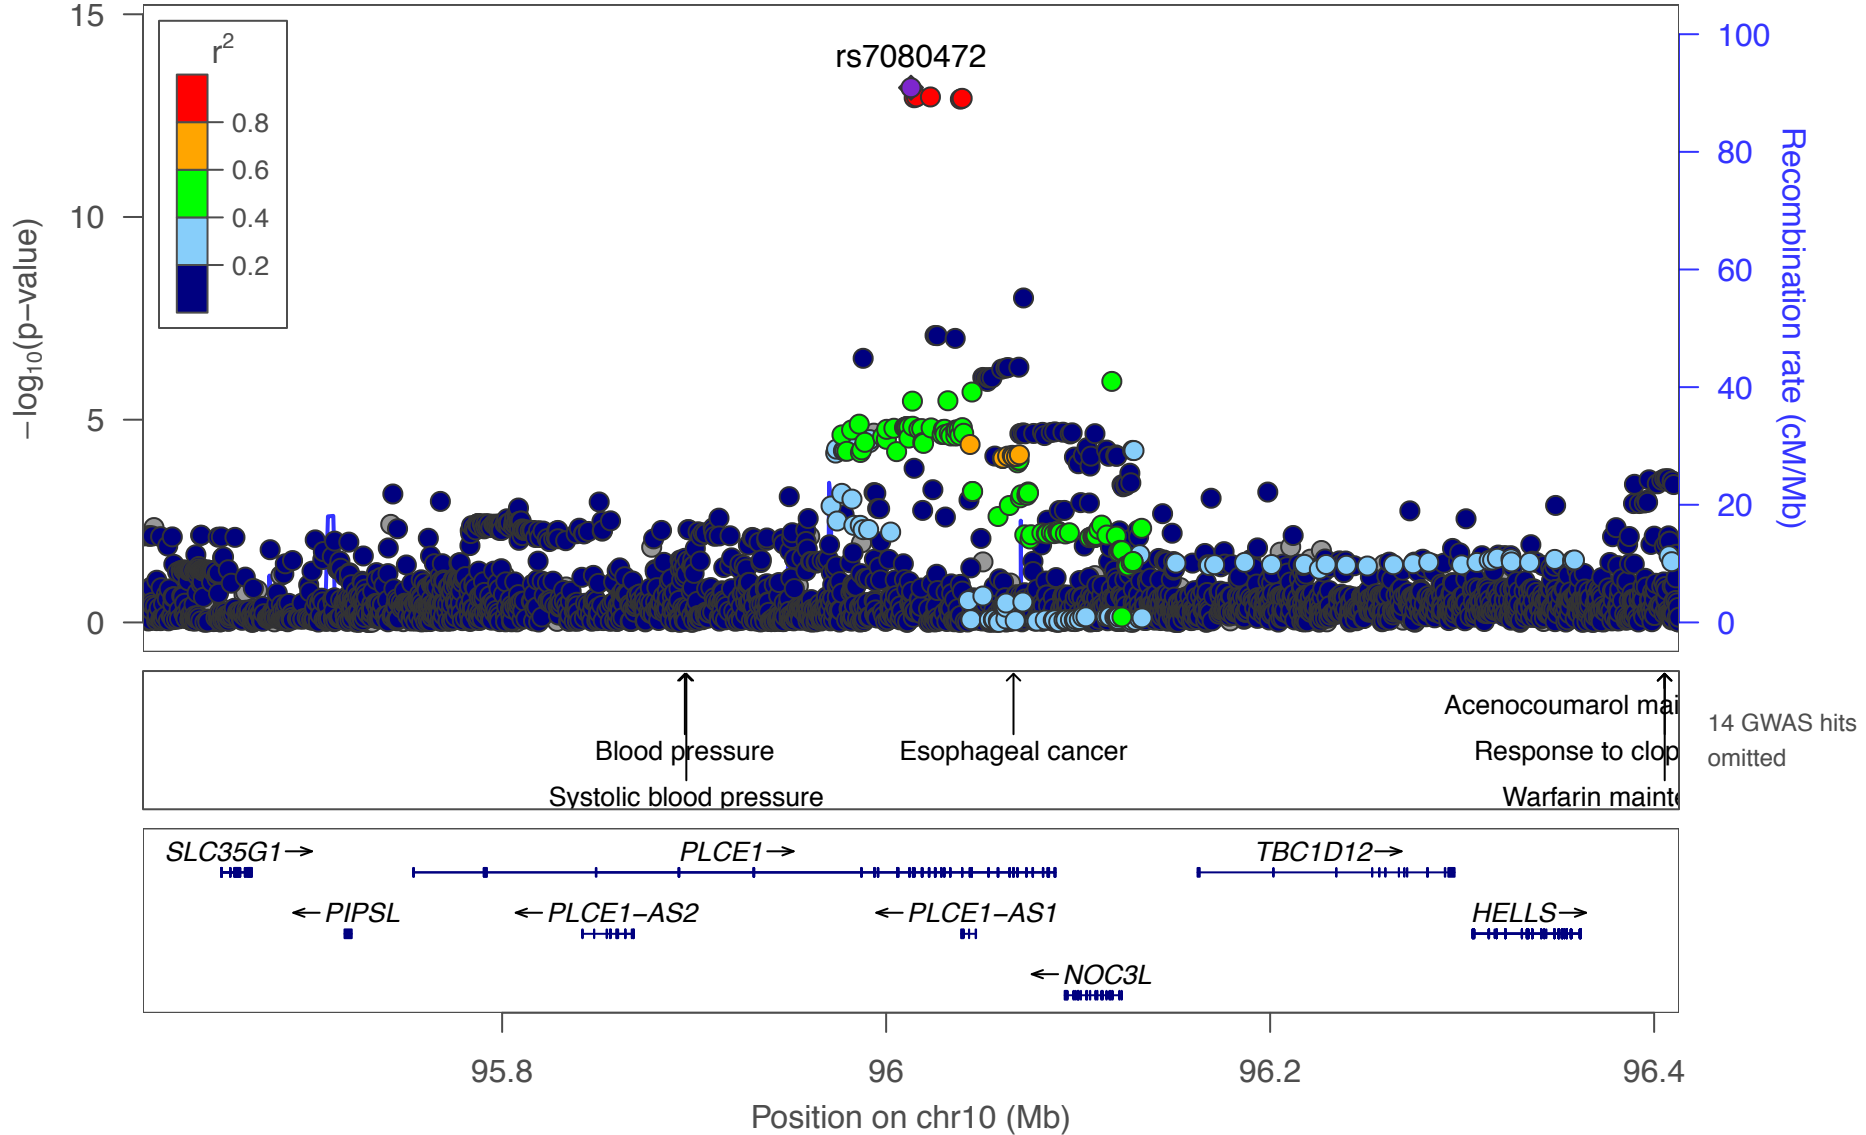

date: Thu Aug 17 18:48:50 2017

build: hg19

display range: chr10:95612950–96412950 [95612950–96412950]

hilite range: 0 – 0 [ 0 – 0 ]

reference SNP: chr10:96012950

number of SNPs plotted: 3177

min P.value: 6.47E–14 [chr10:96012950]

max P.value: 10E–1 [chr10:95669893]

omitted GWAS Hits: chr10:96.066341–Esophageal cancer, chr10:96.405502–Response to clopidogrel therapy

omitted GWAS Hits: NA, NA

GWAS Catalog SNPs in Region

| chr | pos (Mb) | trait                                                                        | snp         |
|-----|----------|------------------------------------------------------------------------------|-------------|
| 10  | 95.65996 | Cannabis dependence                                                          | rs146091982 |
| 10  | 95.89518 | Blood pressure                                                               | rs9663362   |
| 10  | 95.89594 | Systolic blood pressure                                                      | rs932764    |
| 10  | 95.89594 | Diastolic blood pressure                                                     | rs932764    |
| 10  | 95.89594 | Hypertension                                                                 | rs932764    |
| 10  | 95.90632 | Glucose homeostasis traits                                                   | rs1223629   |
| 10  | 96.01371 | Personality traits in bipolar disorder                                       | rs9419788   |
| 10  | 96.01462 | Migraine                                                                     | rs10786156  |
| 10  | 96.01903 | Migraine                                                                     | rs75473620  |
| 10  | 96.03598 | Sudden cardiac arrest                                                        | rs11187837  |
| 10  | 96.03631 | Vertical cup–disc ratio                                                      | rs7072574   |
| 10  | 96.05830 | Dengue shock syndrome                                                        | rs3765524   |
| 10  | 96.05830 | Esophageal cancer and gastric cancer                                         | rs3765524   |
| 10  | 96.05864 | Lifetime average cigarettes per day in chronic obstructive pulmonary disease | rs117607728 |
| 10  | 96.06634 | Esophageal cancer                                                            | rs2274223   |
| 10  | 96.06634 | Esophageal squamous cell carcinoma                                           | rs2274223   |
| 10  | 96.07037 | Esophageal cancer and gastric cancer                                         | rs3781264   |
| 10  | 96.40533 | Acenocoumarol maintenance dosage                                             | rs12772169  |
| 10  | 96.40550 | Response to clopidogrel therapy                                              | rs12777823  |
| 10  | 96.40550 | Warfarin maintenance dose                                                    | rs12777823  |

# NODEamps25\_0013

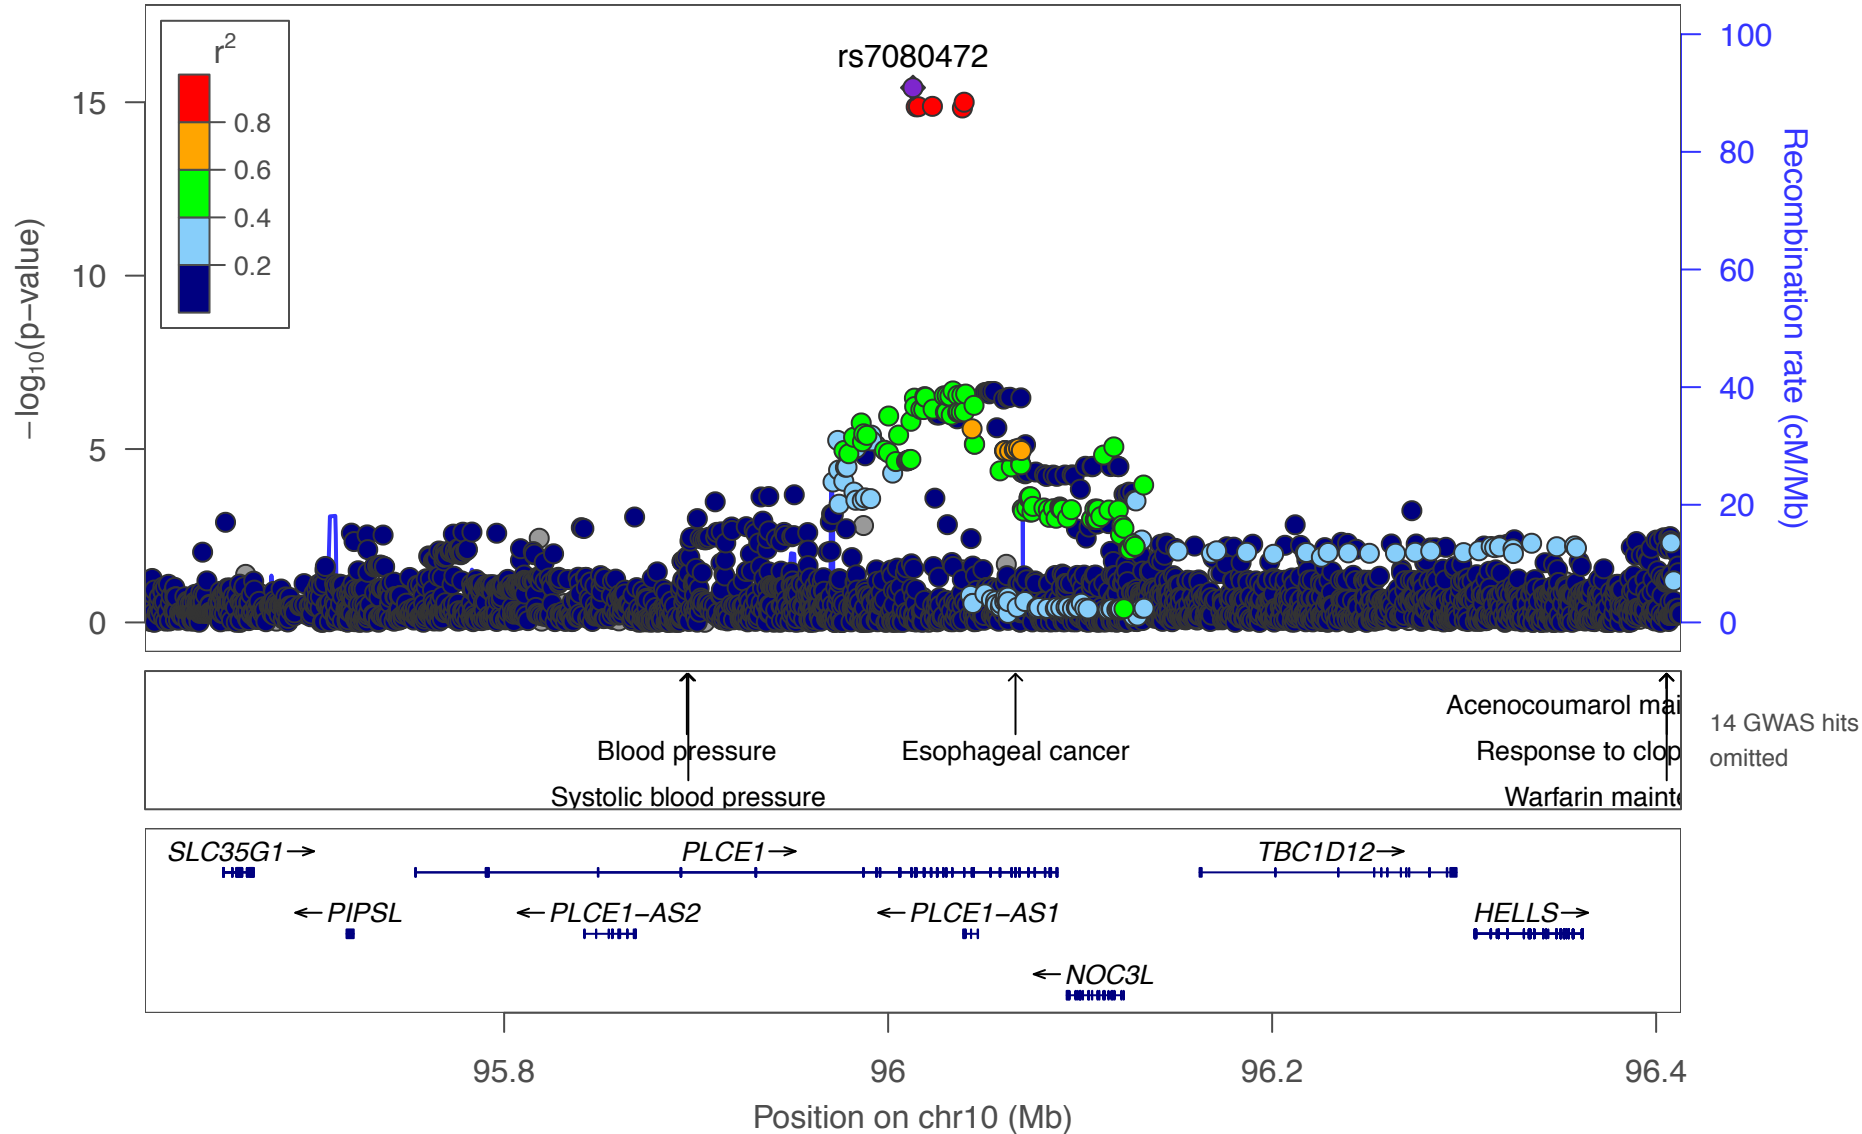

date: Thu Aug 17 18:48:50 2017

build: hg19

display range: chr10:95612950–96412950 [95612950–96412950]

hilite range: 0 – 0 [ 0 – 0 ]

reference SNP: chr10:96012950

number of SNPs plotted: 3177

min P.value: 3.8E–16 [chr10:96012950]

max P.value: 10E–1 [chr10:95975547]

omitted GWAS Hits: chr10:96.066341–Esophageal cancer, chr10:96.405502–Response to clopidogrel therapy

omitted GWAS Hits: NA, NA

GWAS Catalog SNPs in Region

| chr | pos (Mb) | trait                                                                        | snp         |
|-----|----------|------------------------------------------------------------------------------|-------------|
| 10  | 95.65996 | Cannabis dependence                                                          | rs146091982 |
| 10  | 95.89518 | Blood pressure                                                               | rs9663362   |
| 10  | 95.89594 | Systolic blood pressure                                                      | rs932764    |
| 10  | 95.89594 | Diastolic blood pressure                                                     | rs932764    |
| 10  | 95.89594 | Hypertension                                                                 | rs932764    |
| 10  | 95.90632 | Glucose homeostasis traits                                                   | rs1223629   |
| 10  | 96.01371 | Personality traits in bipolar disorder                                       | rs9419788   |
| 10  | 96.01462 | Migraine                                                                     | rs10786156  |
| 10  | 96.01903 | Migraine                                                                     | rs75473620  |
| 10  | 96.03598 | Sudden cardiac arrest                                                        | rs11187837  |
| 10  | 96.03631 | Vertical cup–disc ratio                                                      | rs7072574   |
| 10  | 96.05830 | Dengue shock syndrome                                                        | rs3765524   |
| 10  | 96.05830 | Esophageal cancer and gastric cancer                                         | rs3765524   |
| 10  | 96.05864 | Lifetime average cigarettes per day in chronic obstructive pulmonary disease | rs117607728 |
| 10  | 96.06634 | Esophageal cancer                                                            | rs2274223   |
| 10  | 96.06634 | Esophageal squamous cell carcinoma                                           | rs2274223   |
| 10  | 96.07037 | Esophageal cancer and gastric cancer                                         | rs3781264   |
| 10  | 96.40533 | Acenocoumarol maintenance dosage                                             | rs12772169  |
| 10  | 96.40550 | Response to clopidogrel therapy                                              | rs12777823  |
| 10  | 96.40550 | Warfarin maintenance dose                                                    | rs12777823  |

# NODEamps100\_0010

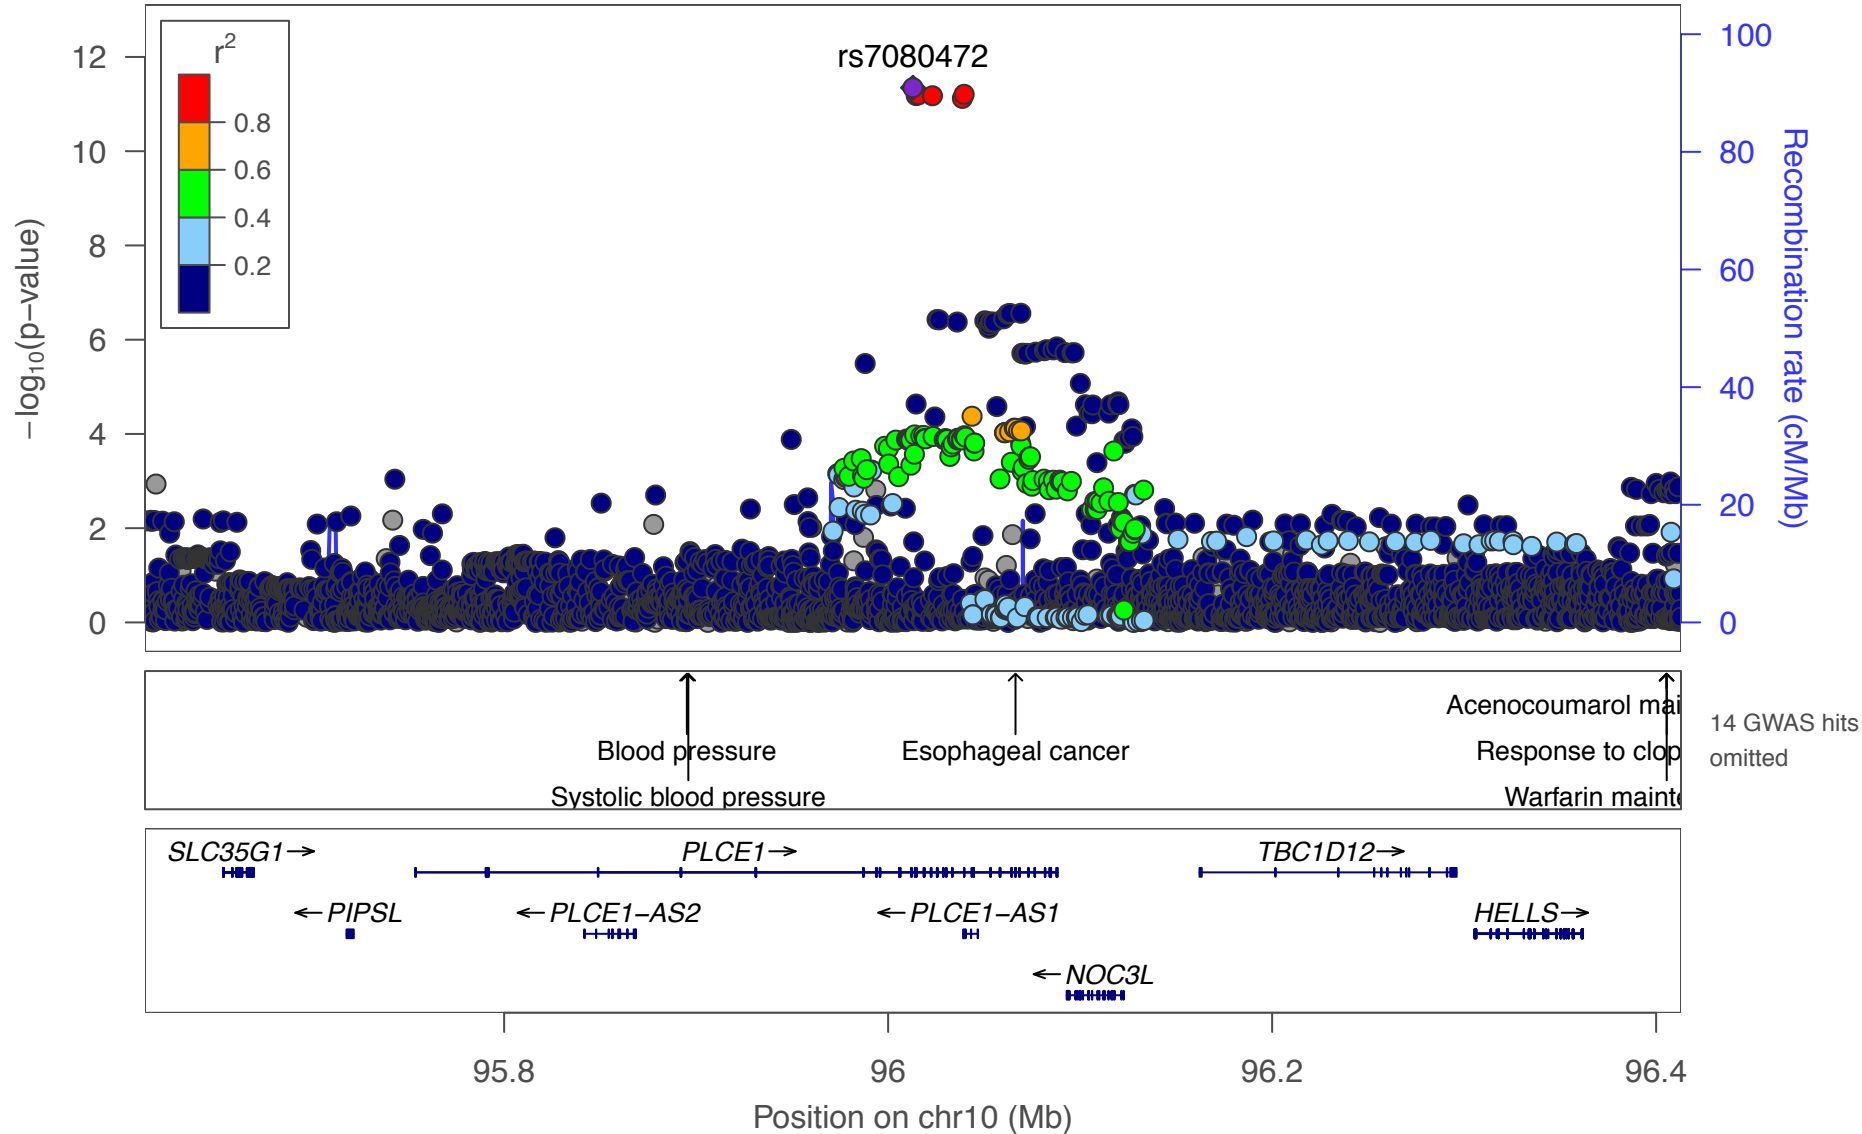



date: Thu Aug 17 18:48:08 2017

build: hg19

display range: chr10:95612950–96412950 [95612950–96412950]

hilite range: 0 – 0 [ 0 – 0 ]

reference SNP: chr10:96012950

number of SNPs plotted: 3177

min P.value: 4.49E–12 [chr10:96012950]

max P.value: 10E–1 [chr10:96062523]

omitted GWAS Hits: chr10:96.066341–Esophageal cancer, chr10:96.405502–Response to clopidogrel therapy

omitted GWAS Hits: NA, NA

GWAS Catalog SNPs in Region

| chr | pos (Mb) | trait                                                                        | snp         |
|-----|----------|------------------------------------------------------------------------------|-------------|
| 10  | 95.65996 | Cannabis dependence                                                          | rs146091982 |
| 10  | 95.89518 | Blood pressure                                                               | rs9663362   |
| 10  | 95.89594 | Systolic blood pressure                                                      | rs932764    |
| 10  | 95.89594 | Diastolic blood pressure                                                     | rs932764    |
| 10  | 95.89594 | Hypertension                                                                 | rs932764    |
| 10  | 95.90632 | Glucose homeostasis traits                                                   | rs1223629   |
| 10  | 96.01371 | Personality traits in bipolar disorder                                       | rs9419788   |
| 10  | 96.01462 | Migraine                                                                     | rs10786156  |
| 10  | 96.01903 | Migraine                                                                     | rs75473620  |
| 10  | 96.03598 | Sudden cardiac arrest                                                        | rs11187837  |
| 10  | 96.03631 | Vertical cup–disc ratio                                                      | rs7072574   |
| 10  | 96.05830 | Dengue shock syndrome                                                        | rs3765524   |
| 10  | 96.05830 | Esophageal cancer and gastric cancer                                         | rs3765524   |
| 10  | 96.05864 | Lifetime average cigarettes per day in chronic obstructive pulmonary disease | rs117607728 |
| 10  | 96.06634 | Esophageal cancer                                                            | rs2274223   |
| 10  | 96.06634 | Esophageal squamous cell carcinoma                                           | rs2274223   |
| 10  | 96.07037 | Esophageal cancer and gastric cancer                                         | rs3781264   |
| 10  | 96.40533 | Acenocoumarol maintenance dosage                                             | rs12772169  |
| 10  | 96.40550 | Response to clopidogrel therapy                                              | rs12777823  |
| 10  | 96.40550 | Warfarin maintenance dose                                                    | rs12777823  |

# NODEamps100\_0011

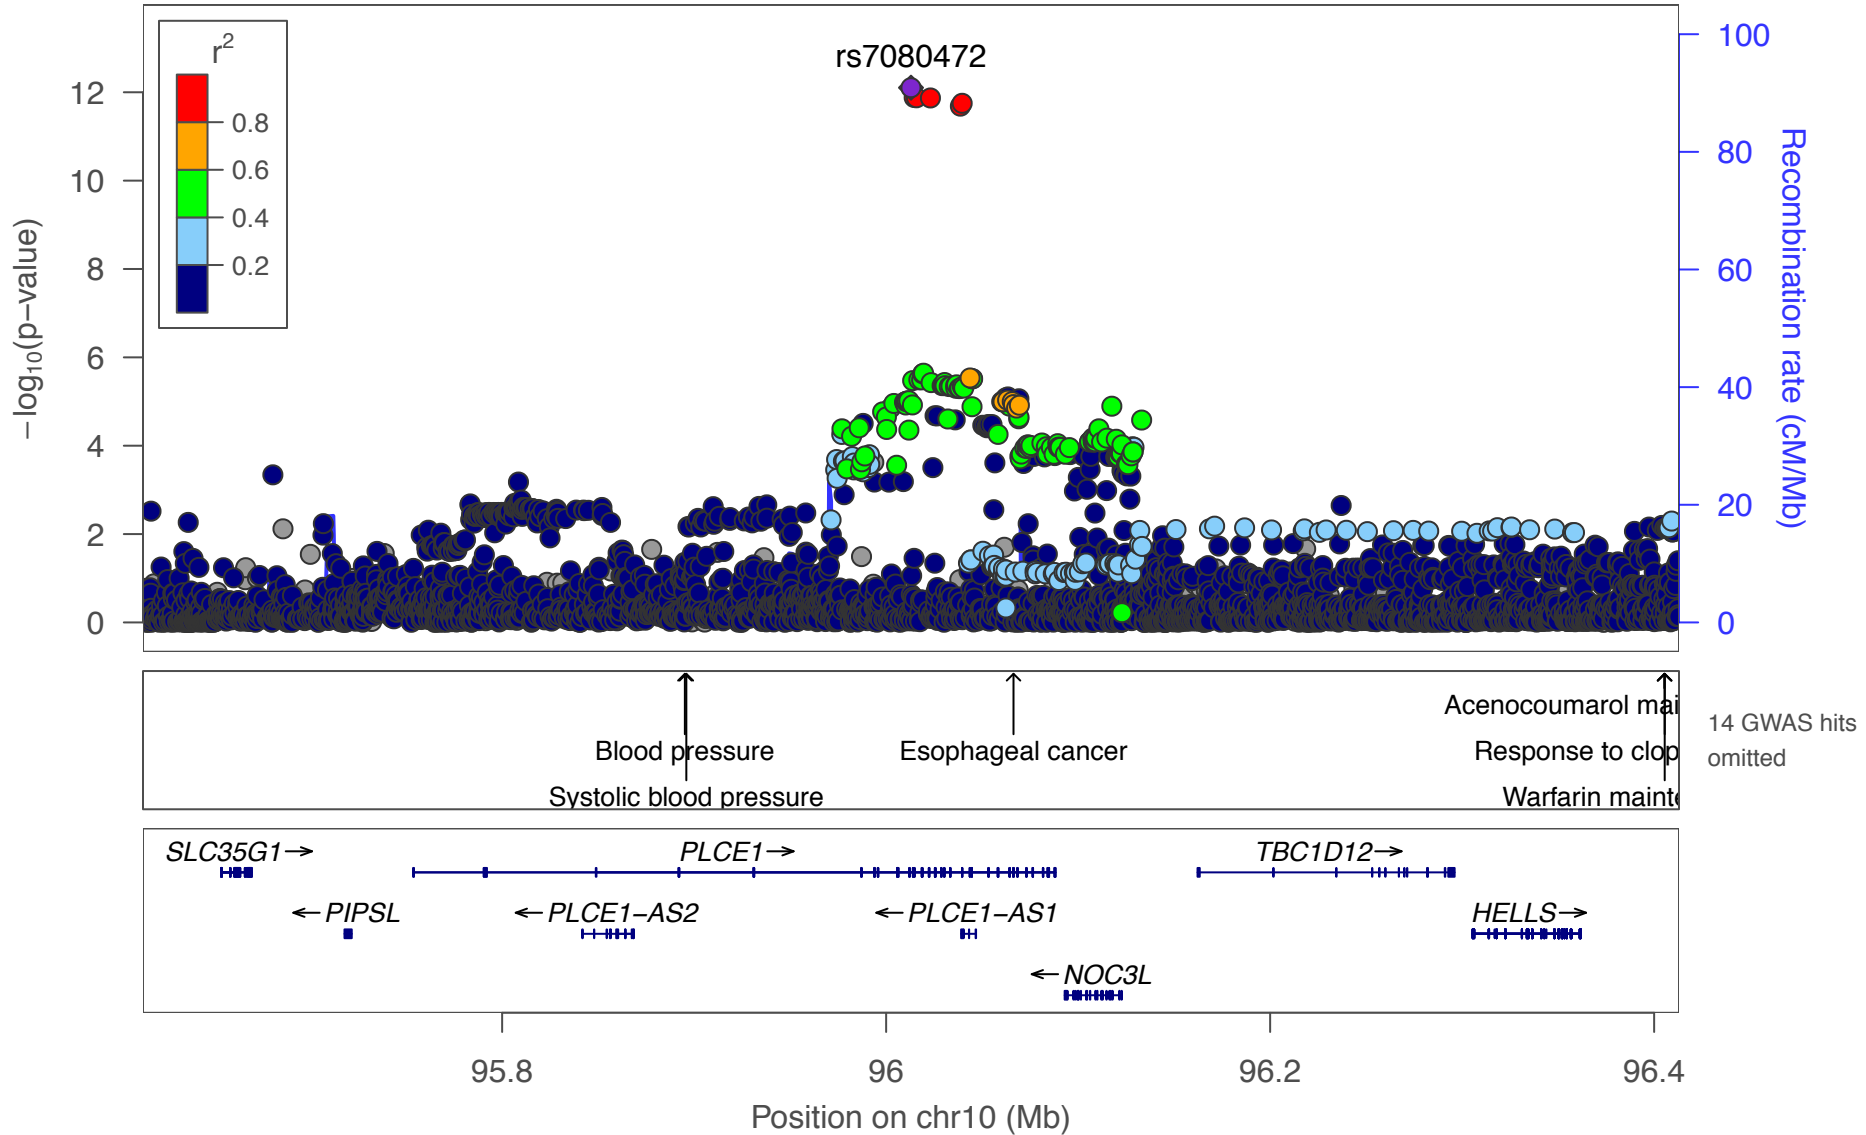

date: Thu Aug 17 18:48:08 2017

build: hg19

display range: chr10:95612950–96412950 [95612950–96412950]

hilite range: 0 – 0 [ 0 – 0 ]

reference SNP: chr10:96012950

number of SNPs plotted: 3177

min P.value:  $7.87E-13$  [chr10:96012950]

max P.value:  $10E-1$  [chr10:95615108]

omitted GWAS Hits: chr10:96.066341–Esophageal cancer, chr10:96.405502–Response to clopidogrel therapy

omitted GWAS Hits: NA, NA

GWAS Catalog SNPs in Region

| chr | pos (Mb) | trait                                                                        | snp         |
|-----|----------|------------------------------------------------------------------------------|-------------|
| 10  | 95.65996 | Cannabis dependence                                                          | rs146091982 |
| 10  | 95.89518 | Blood pressure                                                               | rs9663362   |
| 10  | 95.89594 | Systolic blood pressure                                                      | rs932764    |
| 10  | 95.89594 | Diastolic blood pressure                                                     | rs932764    |
| 10  | 95.89594 | Hypertension                                                                 | rs932764    |
| 10  | 95.90632 | Glucose homeostasis traits                                                   | rs1223629   |
| 10  | 96.01371 | Personality traits in bipolar disorder                                       | rs9419788   |
| 10  | 96.01462 | Migraine                                                                     | rs10786156  |
| 10  | 96.01903 | Migraine                                                                     | rs75473620  |
| 10  | 96.03598 | Sudden cardiac arrest                                                        | rs11187837  |
| 10  | 96.03631 | Vertical cup–disc ratio                                                      | rs7072574   |
| 10  | 96.05830 | Dengue shock syndrome                                                        | rs3765524   |
| 10  | 96.05830 | Esophageal cancer and gastric cancer                                         | rs3765524   |
| 10  | 96.05864 | Lifetime average cigarettes per day in chronic obstructive pulmonary disease | rs117607728 |
| 10  | 96.06634 | Esophageal cancer                                                            | rs2274223   |
| 10  | 96.06634 | Esophageal squamous cell carcinoma                                           | rs2274223   |
| 10  | 96.07037 | Esophageal cancer and gastric cancer                                         | rs3781264   |
| 10  | 96.40533 | Acenocoumarol maintenance dosage                                             | rs12772169  |
| 10  | 96.40550 | Response to clopidogrel therapy                                              | rs12777823  |
| 10  | 96.40550 | Warfarin maintenance dose                                                    | rs12777823  |

# NODEamps100\_0028

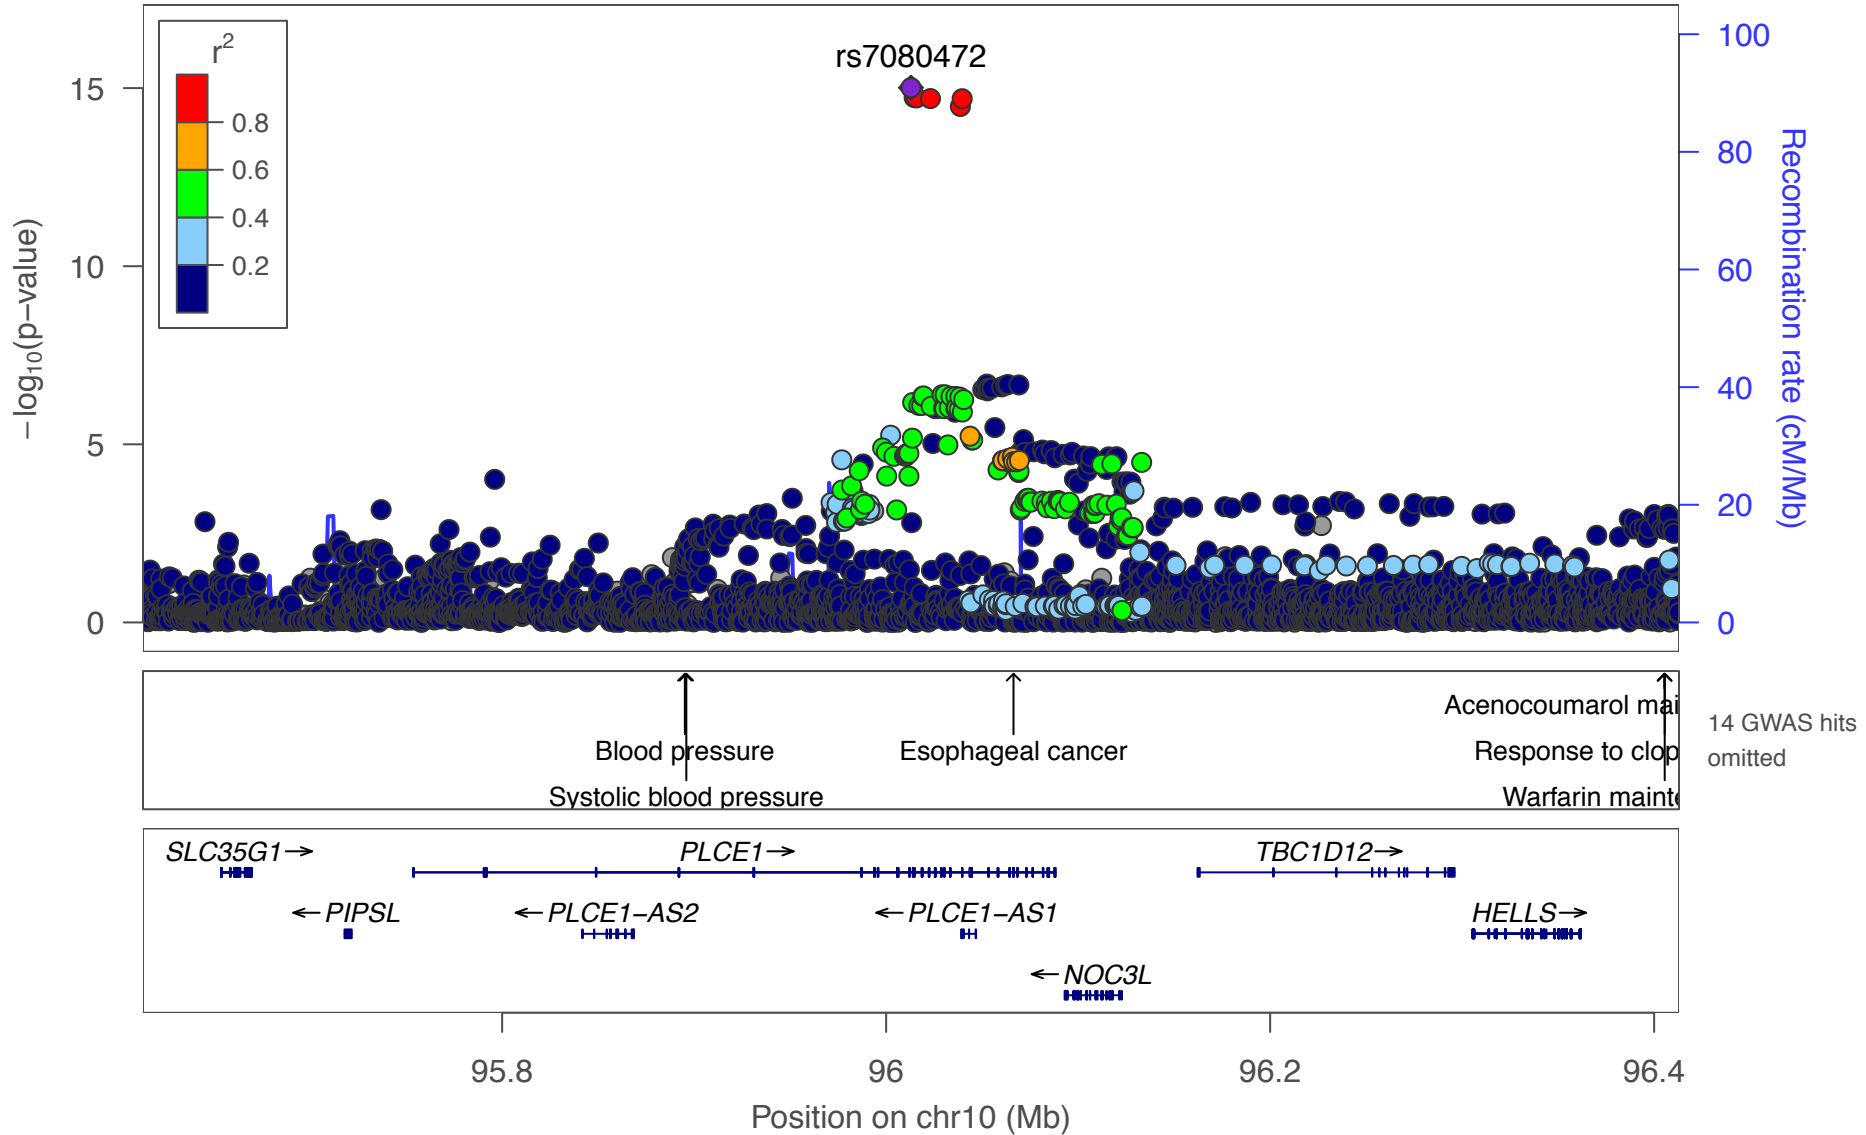

date: Thu Aug 17 18:48:08 2017

build: hg19

display range: chr10:95612950–96412950 [95612950–96412950]

hilite range: 0 – 0 [ 0 – 0 ]

reference SNP: chr10:96012950

number of SNPs plotted: 3177

min P.value: 9.73E–16 [chr10:96012950]

max P.value: 10E–1 [chr10:96015298]

omitted GWAS Hits: chr10:96.066341–Esophageal cancer, chr10:96.405502–Response to clopidogrel therapy

omitted GWAS Hits: NA, NA

GWAS Catalog SNPs in Region

| chr | pos (Mb) | trait                                                                        | snp         |
|-----|----------|------------------------------------------------------------------------------|-------------|
| 10  | 95.65996 | Cannabis dependence                                                          | rs146091982 |
| 10  | 95.89518 | Blood pressure                                                               | rs9663362   |
| 10  | 95.89594 | Systolic blood pressure                                                      | rs932764    |
| 10  | 95.89594 | Diastolic blood pressure                                                     | rs932764    |
| 10  | 95.89594 | Hypertension                                                                 | rs932764    |
| 10  | 95.90632 | Glucose homeostasis traits                                                   | rs1223629   |
| 10  | 96.01371 | Personality traits in bipolar disorder                                       | rs9419788   |
| 10  | 96.01462 | Migraine                                                                     | rs10786156  |
| 10  | 96.01903 | Migraine                                                                     | rs75473620  |
| 10  | 96.03598 | Sudden cardiac arrest                                                        | rs11187837  |
| 10  | 96.03631 | Vertical cup–disc ratio                                                      | rs7072574   |
| 10  | 96.05830 | Dengue shock syndrome                                                        | rs3765524   |
| 10  | 96.05830 | Esophageal cancer and gastric cancer                                         | rs3765524   |
| 10  | 96.05864 | Lifetime average cigarettes per day in chronic obstructive pulmonary disease | rs117607728 |
| 10  | 96.06634 | Esophageal cancer                                                            | rs2274223   |
| 10  | 96.06634 | Esophageal squamous cell carcinoma                                           | rs2274223   |
| 10  | 96.07037 | Esophageal cancer and gastric cancer                                         | rs3781264   |
| 10  | 96.40533 | Acenocoumarol maintenance dosage                                             | rs12772169  |
| 10  | 96.40550 | Response to clopidogrel therapy                                              | rs12777823  |
| 10  | 96.40550 | Warfarin maintenance dose                                                    | rs12777823  |



# NODEamps100\_0029

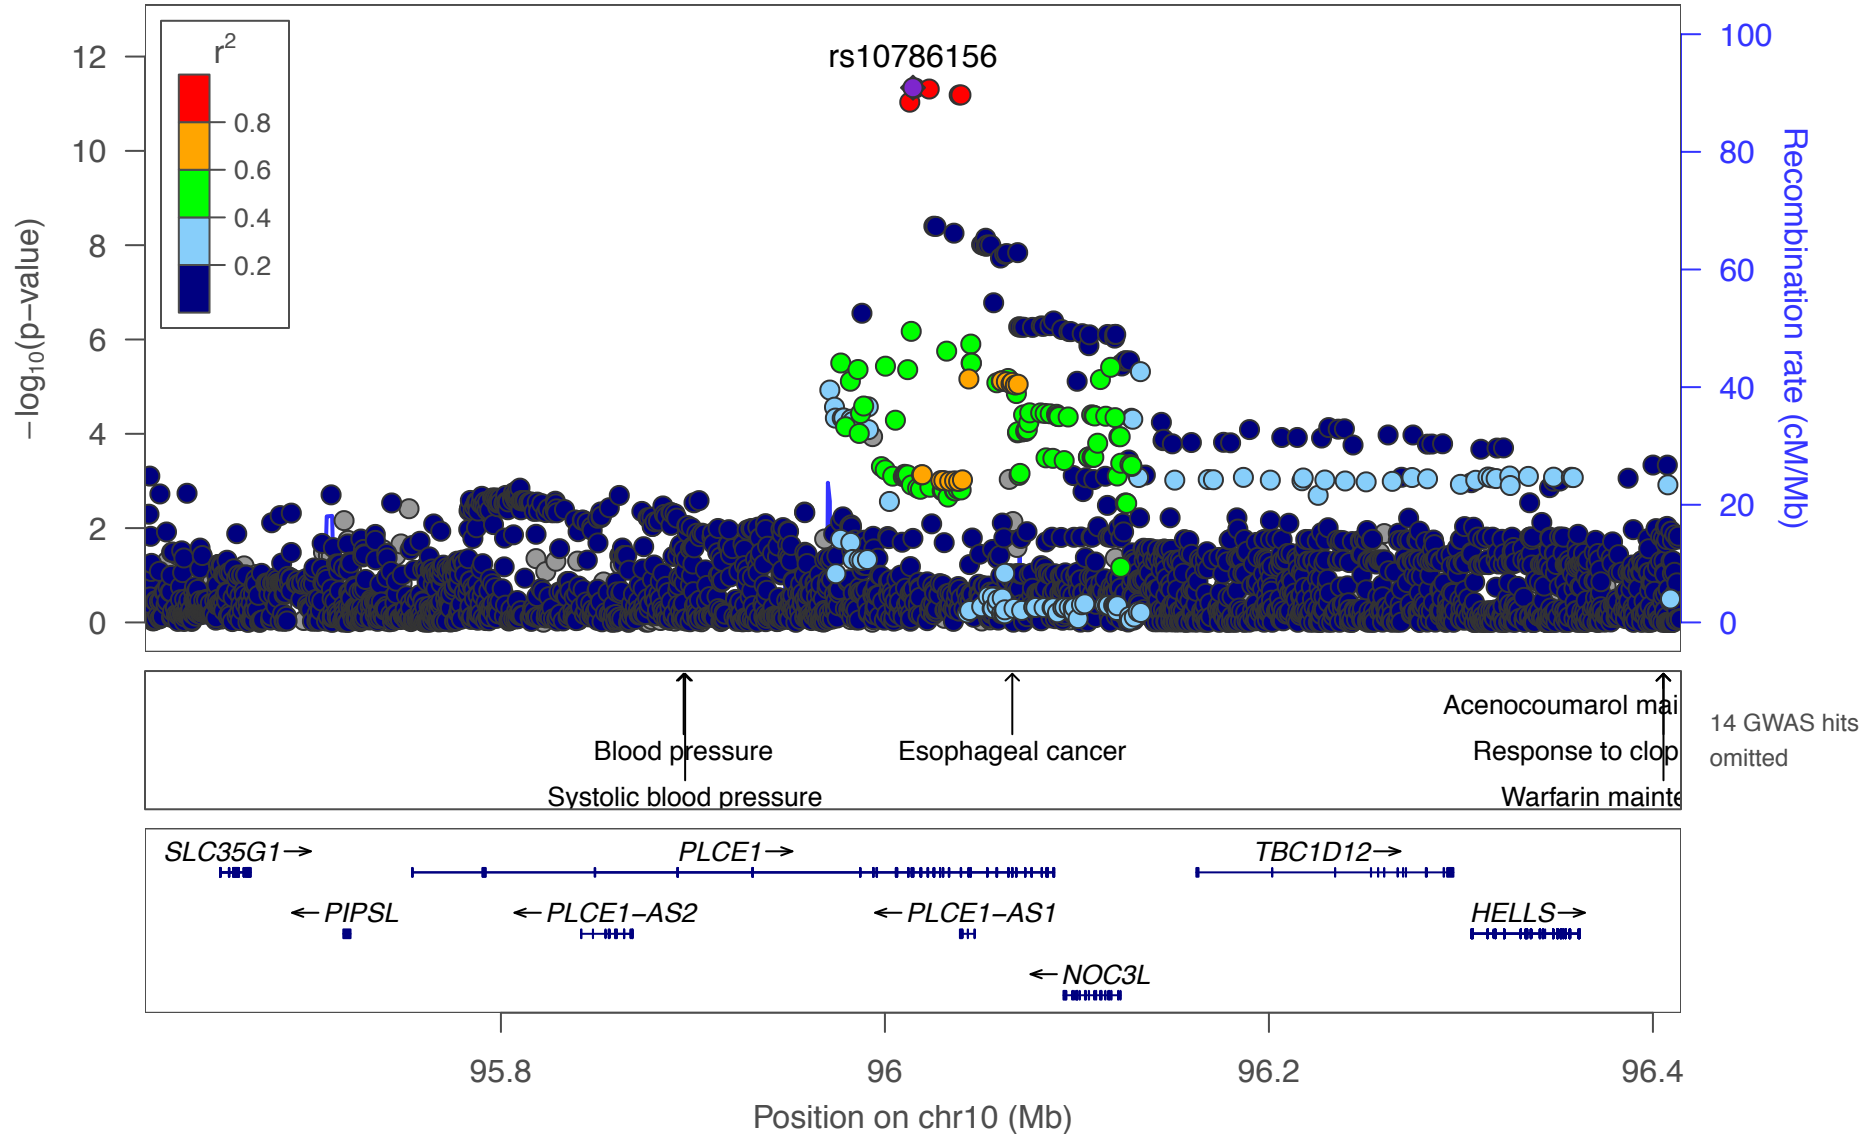

date: Thu Aug 17 18:48:50 2017

build: hg19

display range: chr10:95614622–96414622 [95614622–96414622]

hilite range: 0 – 0 [ 0 – 0 ]

reference SNP: chr10:96014622

number of SNPs plotted: 3178

min P.value: 4.57E–12 [chr10:96014622]

max P.value: 9.99E–1 [chr10:96278592]

omitted GWAS Hits: chr10:96.066341–Esophageal cancer, chr10:96.405502–Response to clopidogrel therapy

omitted GWAS Hits: NA, NA

GWAS Catalog SNPs in Region

| chr | pos (Mb) | trait                                                                        | snp         |
|-----|----------|------------------------------------------------------------------------------|-------------|
| 10  | 95.65996 | Cannabis dependence                                                          | rs146091982 |
| 10  | 95.89518 | Blood pressure                                                               | rs9663362   |
| 10  | 95.89594 | Systolic blood pressure                                                      | rs932764    |
| 10  | 95.89594 | Diastolic blood pressure                                                     | rs932764    |
| 10  | 95.89594 | Hypertension                                                                 | rs932764    |
| 10  | 95.90632 | Glucose homeostasis traits                                                   | rs1223629   |
| 10  | 96.01371 | Personality traits in bipolar disorder                                       | rs9419788   |
| 10  | 96.01462 | Migraine                                                                     | rs10786156  |
| 10  | 96.01903 | Migraine                                                                     | rs75473620  |
| 10  | 96.03598 | Sudden cardiac arrest                                                        | rs11187837  |
| 10  | 96.03631 | Vertical cup–disc ratio                                                      | rs7072574   |
| 10  | 96.05830 | Dengue shock syndrome                                                        | rs3765524   |
| 10  | 96.05830 | Esophageal cancer and gastric cancer                                         | rs3765524   |
| 10  | 96.05864 | Lifetime average cigarettes per day in chronic obstructive pulmonary disease | rs117607728 |
| 10  | 96.06634 | Esophageal cancer                                                            | rs2274223   |
| 10  | 96.06634 | Esophageal squamous cell carcinoma                                           | rs2274223   |
| 10  | 96.07037 | Esophageal cancer and gastric cancer                                         | rs3781264   |
| 10  | 96.40533 | Acenocoumarol maintenance dosage                                             | rs12772169  |
| 10  | 96.40550 | Response to clopidogrel therapy                                              | rs12777823  |
| 10  | 96.40550 | Warfarin maintenance dose                                                    | rs12777823  |

# NODEamps100\_0027

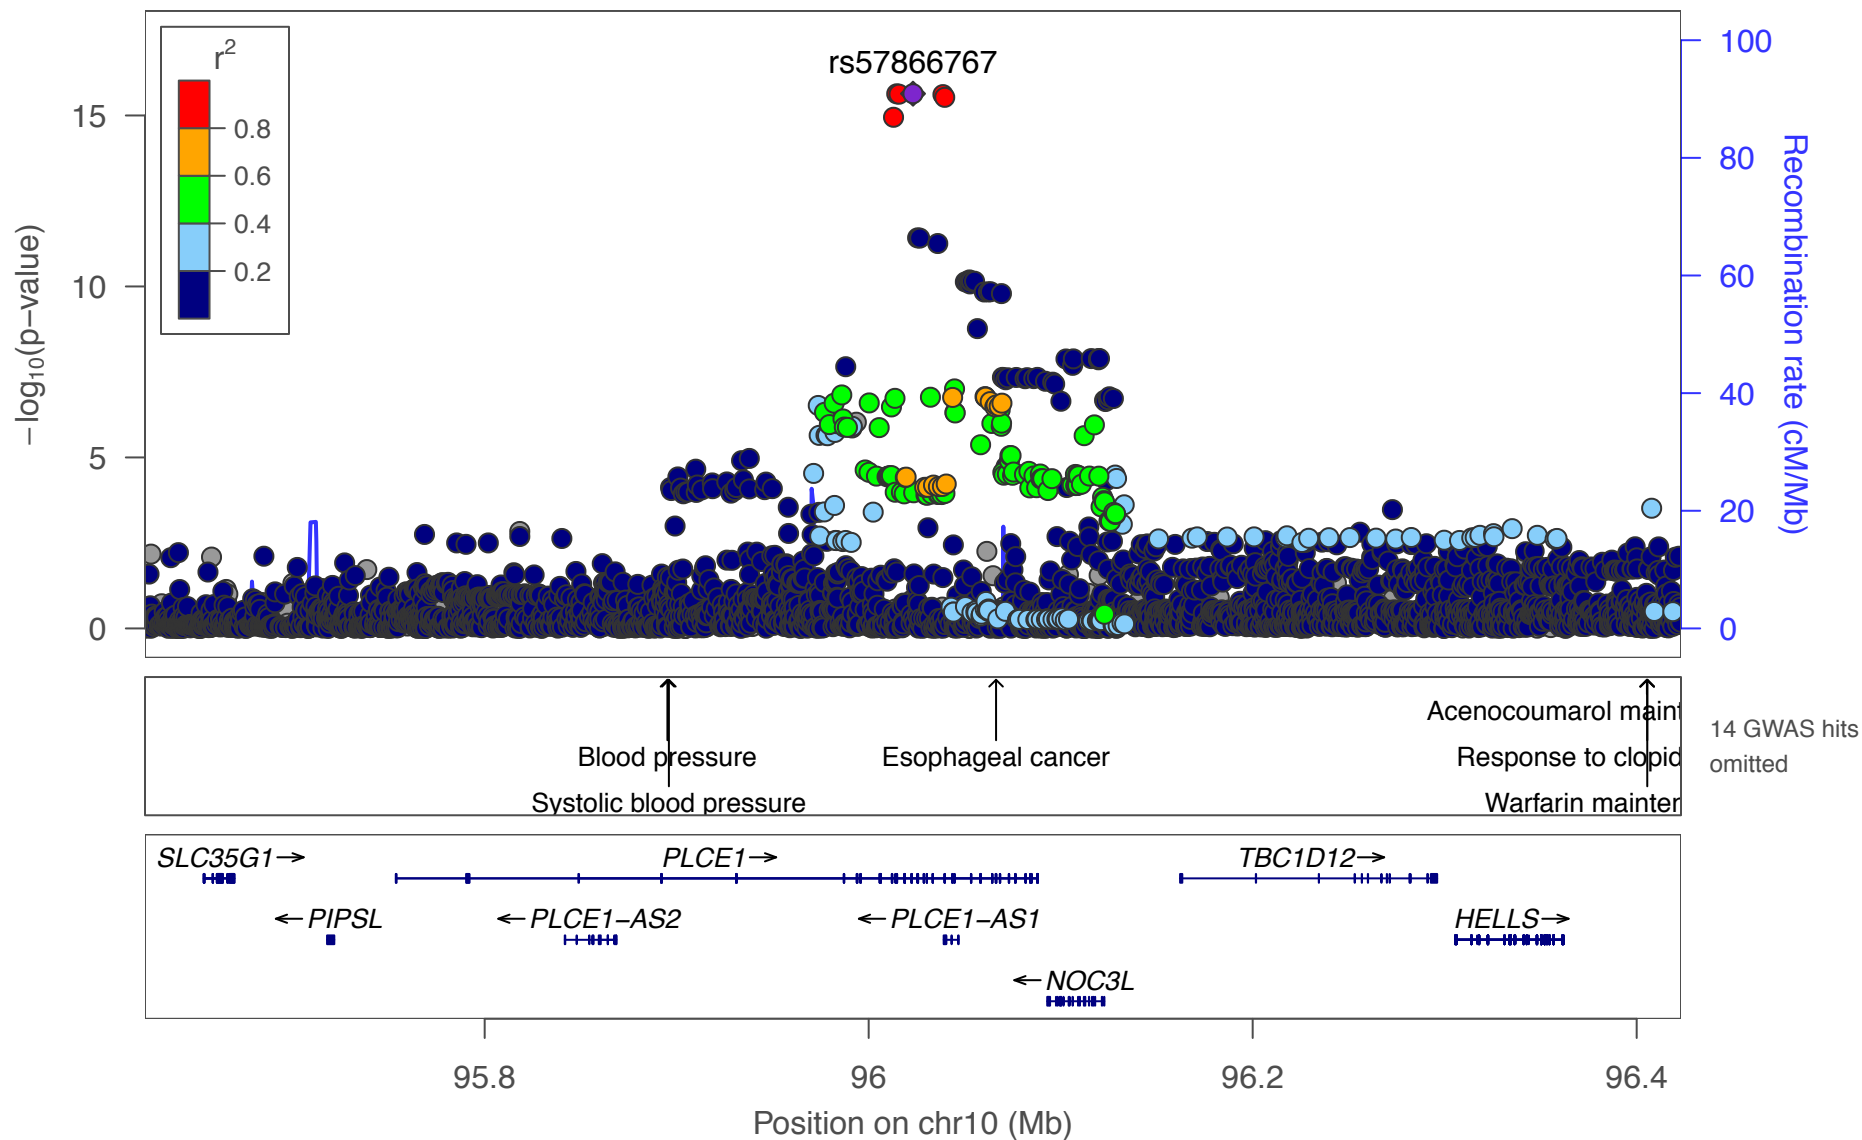

date: Thu Aug 17 18:49:10 2017

build: hg19

display range: chr10:95623077–96423077 [95623077–96423077]

hilite range: 0 – 0 [ 0 – 0 ]

reference SNP: chr10:96023077

number of SNPs plotted: 3184

min P.value: 2.31E–16 [chr10:96023077]

max P.value: 9.99E–1 [chr10:96119218]

omitted GWAS Hits: chr10:96.066341–Esophageal cancer, chr10:96.405502–Response to clopidogrel therapy

omitted GWAS Hits: NA, NA

GWAS Catalog SNPs in Region

| chr | pos (Mb) | trait                                                                        | snp         |
|-----|----------|------------------------------------------------------------------------------|-------------|
| 10  | 95.65996 | Cannabis dependence                                                          | rs146091982 |
| 10  | 95.89518 | Blood pressure                                                               | rs9663362   |
| 10  | 95.89594 | Systolic blood pressure                                                      | rs932764    |
| 10  | 95.89594 | Diastolic blood pressure                                                     | rs932764    |
| 10  | 95.89594 | Hypertension                                                                 | rs932764    |
| 10  | 95.90632 | Glucose homeostasis traits                                                   | rs1223629   |
| 10  | 96.01371 | Personality traits in bipolar disorder                                       | rs9419788   |
| 10  | 96.01462 | Migraine                                                                     | rs10786156  |
| 10  | 96.01903 | Migraine                                                                     | rs75473620  |
| 10  | 96.03598 | Sudden cardiac arrest                                                        | rs11187837  |
| 10  | 96.03631 | Vertical cup–disc ratio                                                      | rs7072574   |
| 10  | 96.05830 | Dengue shock syndrome                                                        | rs3765524   |
| 10  | 96.05830 | Esophageal cancer and gastric cancer                                         | rs3765524   |
| 10  | 96.05864 | Lifetime average cigarettes per day in chronic obstructive pulmonary disease | rs117607728 |
| 10  | 96.06634 | Esophageal cancer                                                            | rs2274223   |
| 10  | 96.06634 | Esophageal squamous cell carcinoma                                           | rs2274223   |
| 10  | 96.07037 | Esophageal cancer and gastric cancer                                         | rs3781264   |
| 10  | 96.40533 | Acenocoumarol maintenance dosage                                             | rs12772169  |
| 10  | 96.40550 | Response to clopidogrel therapy                                              | rs12777823  |
| 10  | 96.40550 | Warfarin maintenance dose                                                    | rs12777823  |

# NODEamps25\_0020

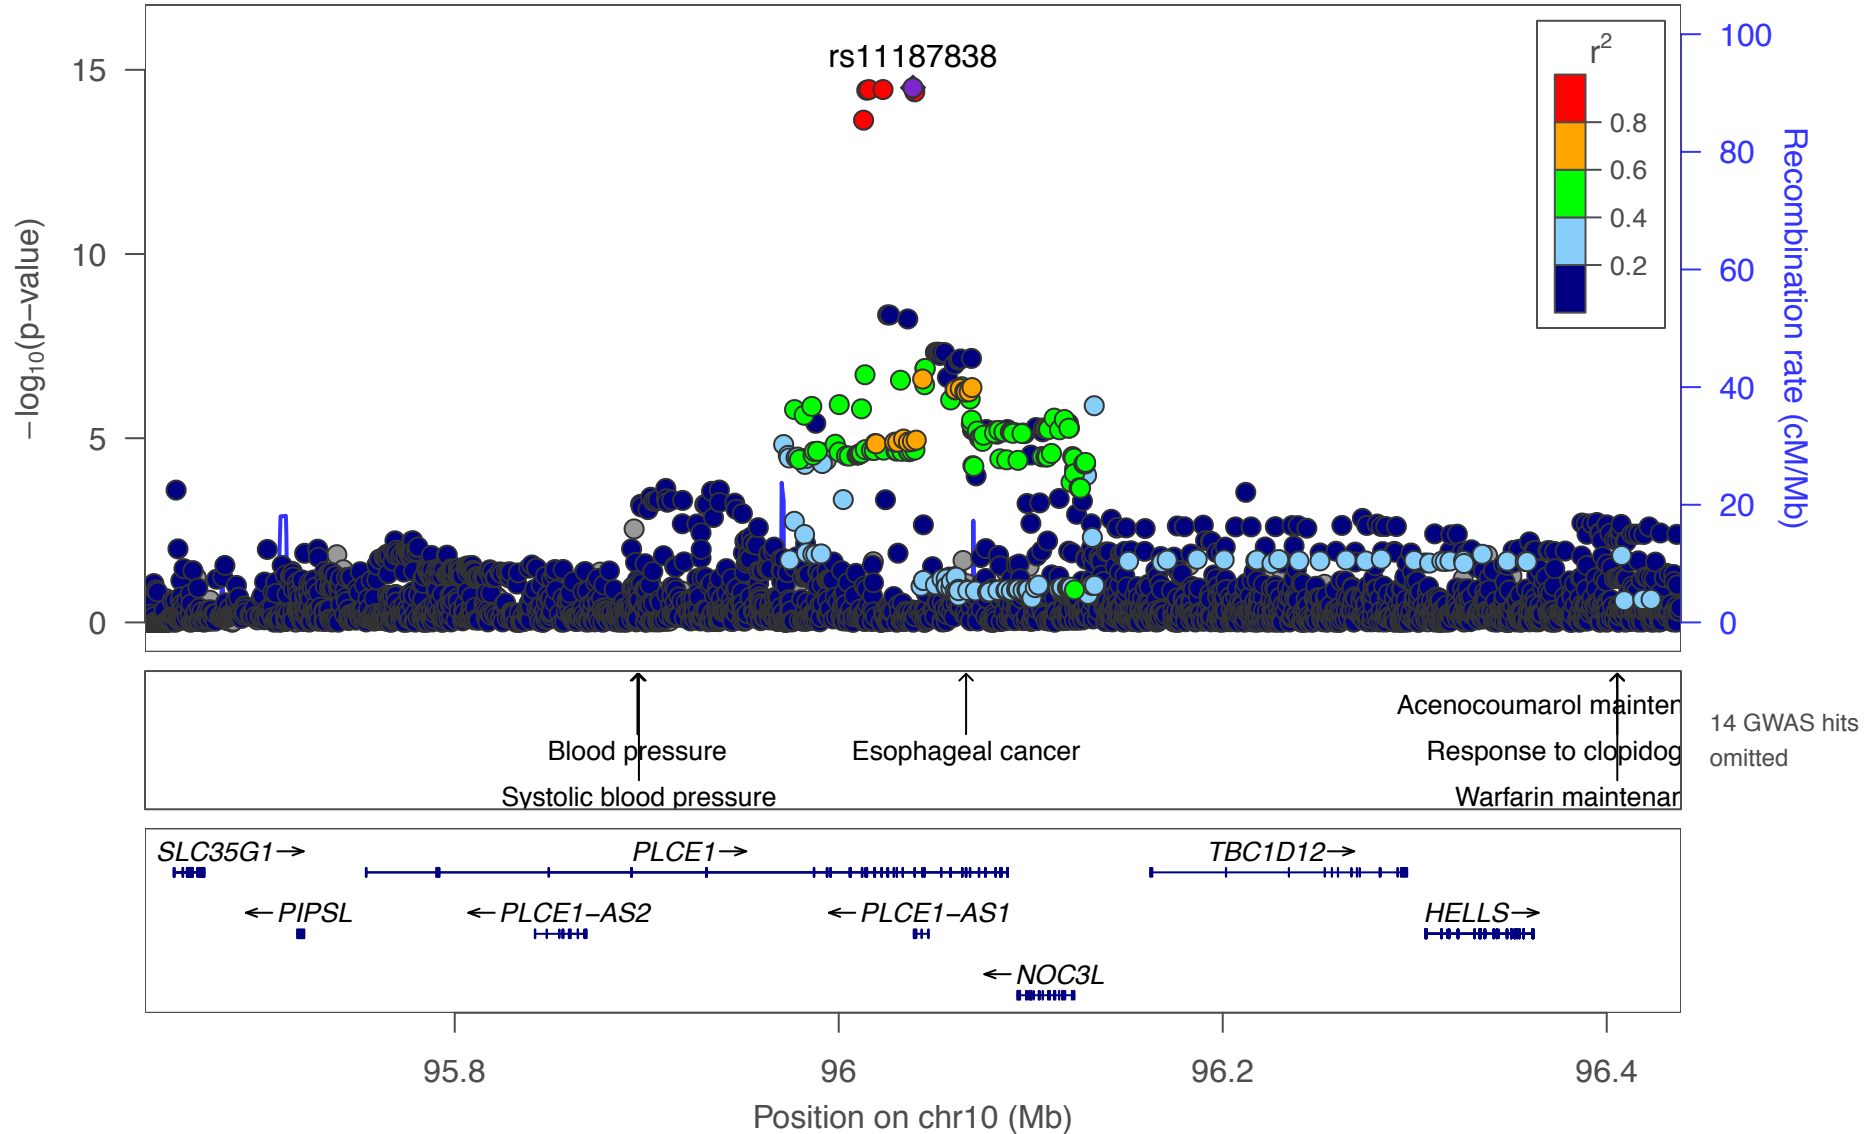

date: Thu Aug 17 18:47:34 2017

build: hg19

display range: chr10:95638686–96438686 [95638686–96438686]

hilite range: 0 – 0 [ 0 – 0 ]

reference SNP: chr10:96038686

number of SNPs plotted: 3190

min P.value: 3.05E–15 [chr10:96038686]

max P.value: 9.99E–1 [chr10:96260800]

omitted GWAS Hits: chr10:96.066341–Esophageal cancer, chr10:96.405502–Response to clopidogrel therapy

omitted GWAS Hits: NA, NA



GWAS Catalog SNPs in Region

| chr | pos (Mb) | trait                                                                        | snp         |
|-----|----------|------------------------------------------------------------------------------|-------------|
| 10  | 95.65996 | Cannabis dependence                                                          | rs146091982 |
| 10  | 95.89518 | Blood pressure                                                               | rs9663362   |
| 10  | 95.89594 | Systolic blood pressure                                                      | rs932764    |
| 10  | 95.89594 | Diastolic blood pressure                                                     | rs932764    |
| 10  | 95.89594 | Hypertension                                                                 | rs932764    |
| 10  | 95.90632 | Glucose homeostasis traits                                                   | rs1223629   |
| 10  | 96.01371 | Personality traits in bipolar disorder                                       | rs9419788   |
| 10  | 96.01462 | Migraine                                                                     | rs10786156  |
| 10  | 96.01903 | Migraine                                                                     | rs75473620  |
| 10  | 96.03598 | Sudden cardiac arrest                                                        | rs11187837  |
| 10  | 96.03631 | Vertical cup–disc ratio                                                      | rs7072574   |
| 10  | 96.05830 | Dengue shock syndrome                                                        | rs3765524   |
| 10  | 96.05830 | Esophageal cancer and gastric cancer                                         | rs3765524   |
| 10  | 96.05864 | Lifetime average cigarettes per day in chronic obstructive pulmonary disease | rs117607728 |
| 10  | 96.06634 | Esophageal cancer                                                            | rs2274223   |
| 10  | 96.06634 | Esophageal squamous cell carcinoma                                           | rs2274223   |
| 10  | 96.07037 | Esophageal cancer and gastric cancer                                         | rs3781264   |
| 10  | 96.40533 | Acenocoumarol maintenance dosage                                             | rs12772169  |
| 10  | 96.40550 | Response to clopidogrel therapy                                              | rs12777823  |
| 10  | 96.40550 | Warfarin maintenance dose                                                    | rs12777823  |

# NODEamps25\_0001

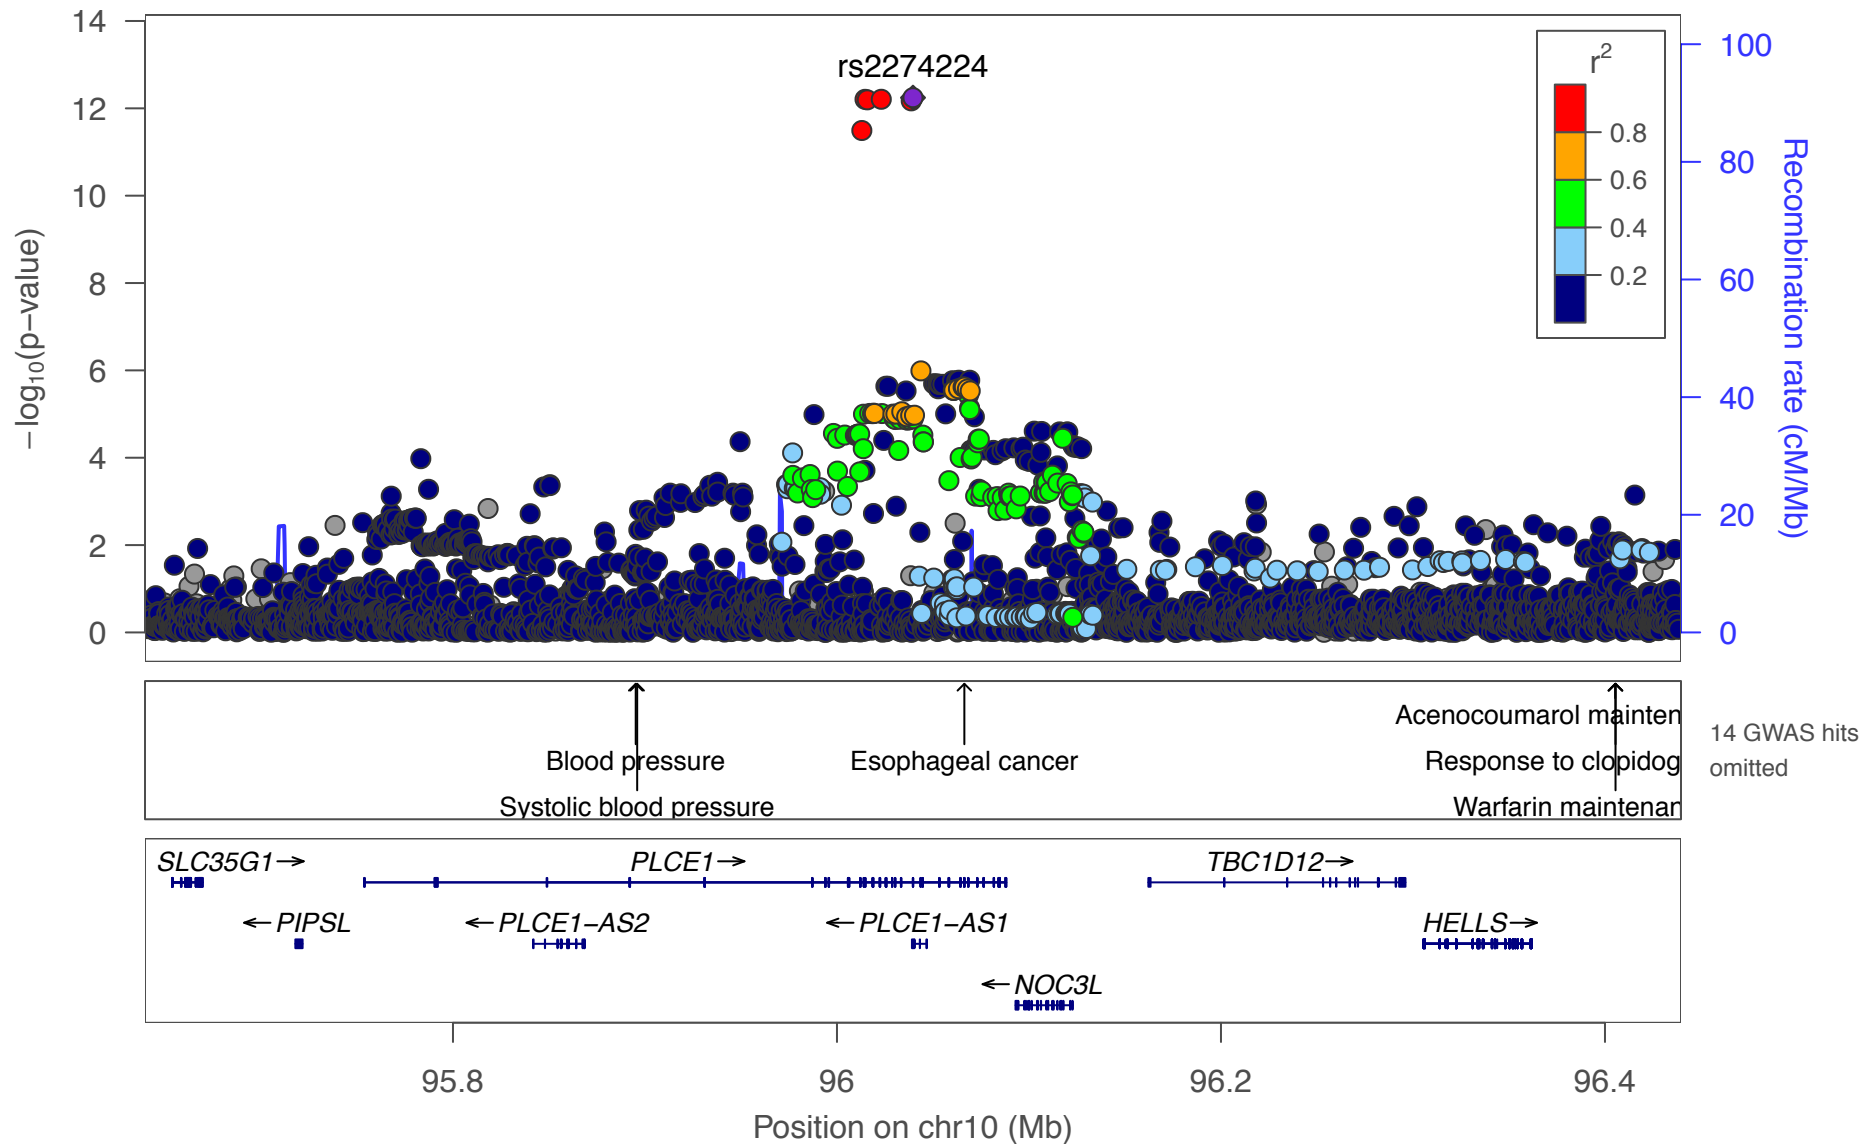

date: Thu Aug 17 18:49:43 2017

build: hg19

display range: chr10:95639597–96439597 [95639597–96439597]

hilite range: 0 – 0 [ 0 – 0 ]

reference SNP: chr10:96039597

number of SNPs plotted: 3187

min P.value: 5.7E–13 [chr10:96039597]

max P.value: 9.99E–1 [chr10:96176921]

omitted GWAS Hits: chr10:96.066341–Esophageal cancer, chr10:96.405502–Response to clopidogrel therapy

omitted GWAS Hits: NA, NA

GWAS Catalog SNPs in Region

| chr | pos (Mb) | trait                                                                        | snp         |
|-----|----------|------------------------------------------------------------------------------|-------------|
| 10  | 95.65996 | Cannabis dependence                                                          | rs146091982 |
| 10  | 95.89518 | Blood pressure                                                               | rs9663362   |
| 10  | 95.89594 | Systolic blood pressure                                                      | rs932764    |
| 10  | 95.89594 | Diastolic blood pressure                                                     | rs932764    |
| 10  | 95.89594 | Hypertension                                                                 | rs932764    |
| 10  | 95.90632 | Glucose homeostasis traits                                                   | rs1223629   |
| 10  | 96.01371 | Personality traits in bipolar disorder                                       | rs9419788   |
| 10  | 96.01462 | Migraine                                                                     | rs10786156  |
| 10  | 96.01903 | Migraine                                                                     | rs75473620  |
| 10  | 96.03598 | Sudden cardiac arrest                                                        | rs11187837  |
| 10  | 96.03631 | Vertical cup–disc ratio                                                      | rs7072574   |
| 10  | 96.05830 | Dengue shock syndrome                                                        | rs3765524   |
| 10  | 96.05830 | Esophageal cancer and gastric cancer                                         | rs3765524   |
| 10  | 96.05864 | Lifetime average cigarettes per day in chronic obstructive pulmonary disease | rs117607728 |
| 10  | 96.06634 | Esophageal cancer                                                            | rs2274223   |
| 10  | 96.06634 | Esophageal squamous cell carcinoma                                           | rs2274223   |
| 10  | 96.07037 | Esophageal cancer and gastric cancer                                         | rs3781264   |
| 10  | 96.40533 | Acenocoumarol maintenance dosage                                             | rs12772169  |
| 10  | 96.40550 | Response to clopidogrel therapy                                              | rs12777823  |
| 10  | 96.40550 | Warfarin maintenance dose                                                    | rs12777823  |

# NODEamps25\_0005

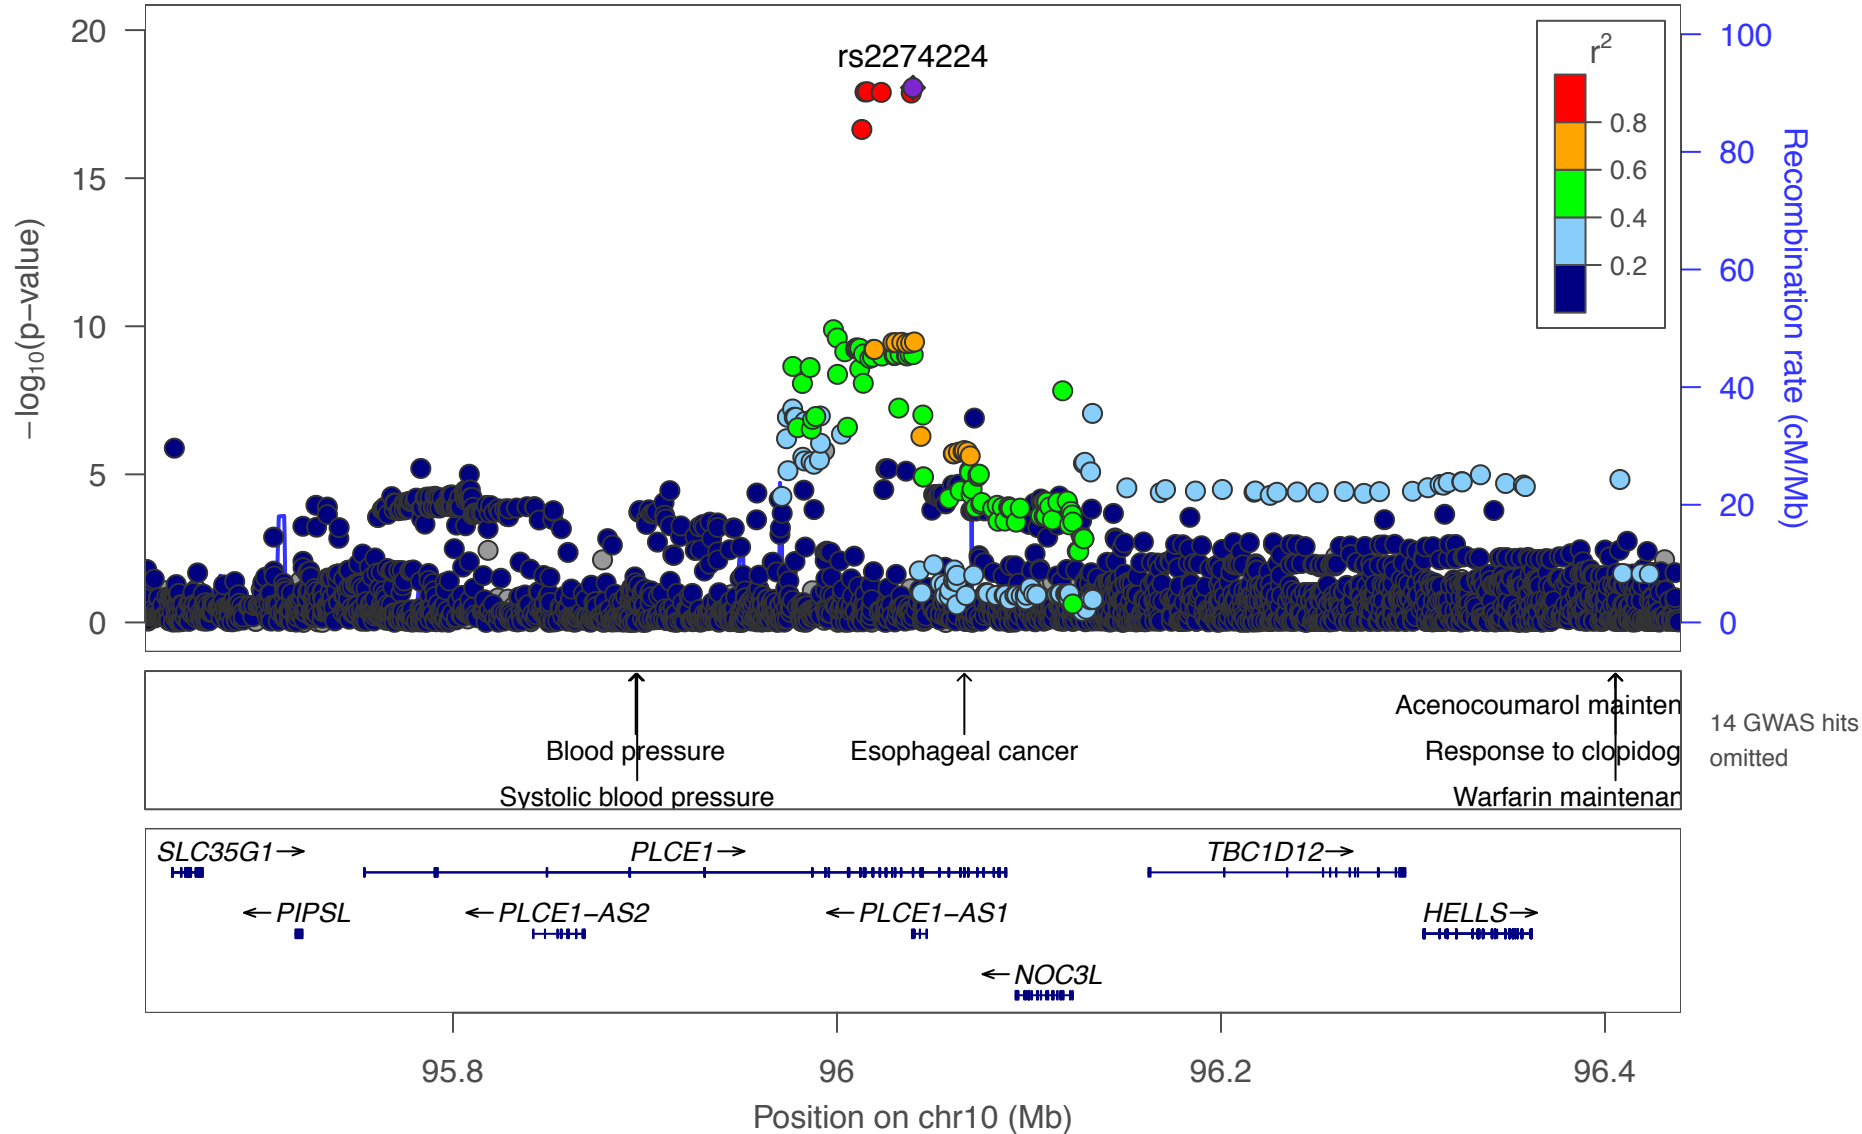

date: Thu Aug 17 18:49:43 2017

build: hg19

display range: chr10:95639597–96439597 [95639597–96439597]

hilite range: 0 – 0 [ 0 – 0 ]

reference SNP: chr10:96039597

number of SNPs plotted: 3187

min P.value: 8.79E–19 [chr10:96039597]

max P.value: 10E–1 [chr10:96056694]

omitted GWAS Hits: chr10:96.066341–Esophageal cancer, chr10:96.405502–Response to clopidogrel therapy

omitted GWAS Hits: NA, NA

GWAS Catalog SNPs in Region

| chr | pos (Mb) | trait                                                                        | snp         |
|-----|----------|------------------------------------------------------------------------------|-------------|
| 10  | 95.65996 | Cannabis dependence                                                          | rs146091982 |
| 10  | 95.89518 | Blood pressure                                                               | rs9663362   |
| 10  | 95.89594 | Systolic blood pressure                                                      | rs932764    |
| 10  | 95.89594 | Diastolic blood pressure                                                     | rs932764    |
| 10  | 95.89594 | Hypertension                                                                 | rs932764    |
| 10  | 95.90632 | Glucose homeostasis traits                                                   | rs1223629   |
| 10  | 96.01371 | Personality traits in bipolar disorder                                       | rs9419788   |
| 10  | 96.01462 | Migraine                                                                     | rs10786156  |
| 10  | 96.01903 | Migraine                                                                     | rs75473620  |
| 10  | 96.03598 | Sudden cardiac arrest                                                        | rs11187837  |
| 10  | 96.03631 | Vertical cup–disc ratio                                                      | rs7072574   |
| 10  | 96.05830 | Dengue shock syndrome                                                        | rs3765524   |
| 10  | 96.05830 | Esophageal cancer and gastric cancer                                         | rs3765524   |
| 10  | 96.05864 | Lifetime average cigarettes per day in chronic obstructive pulmonary disease | rs117607728 |
| 10  | 96.06634 | Esophageal cancer                                                            | rs2274223   |
| 10  | 96.06634 | Esophageal squamous cell carcinoma                                           | rs2274223   |
| 10  | 96.07037 | Esophageal cancer and gastric cancer                                         | rs3781264   |
| 10  | 96.40533 | Acenocoumarol maintenance dosage                                             | rs12772169  |
| 10  | 96.40550 | Response to clopidogrel therapy                                              | rs12777823  |
| 10  | 96.40550 | Warfarin maintenance dose                                                    | rs12777823  |

# NODEamps25\_0014

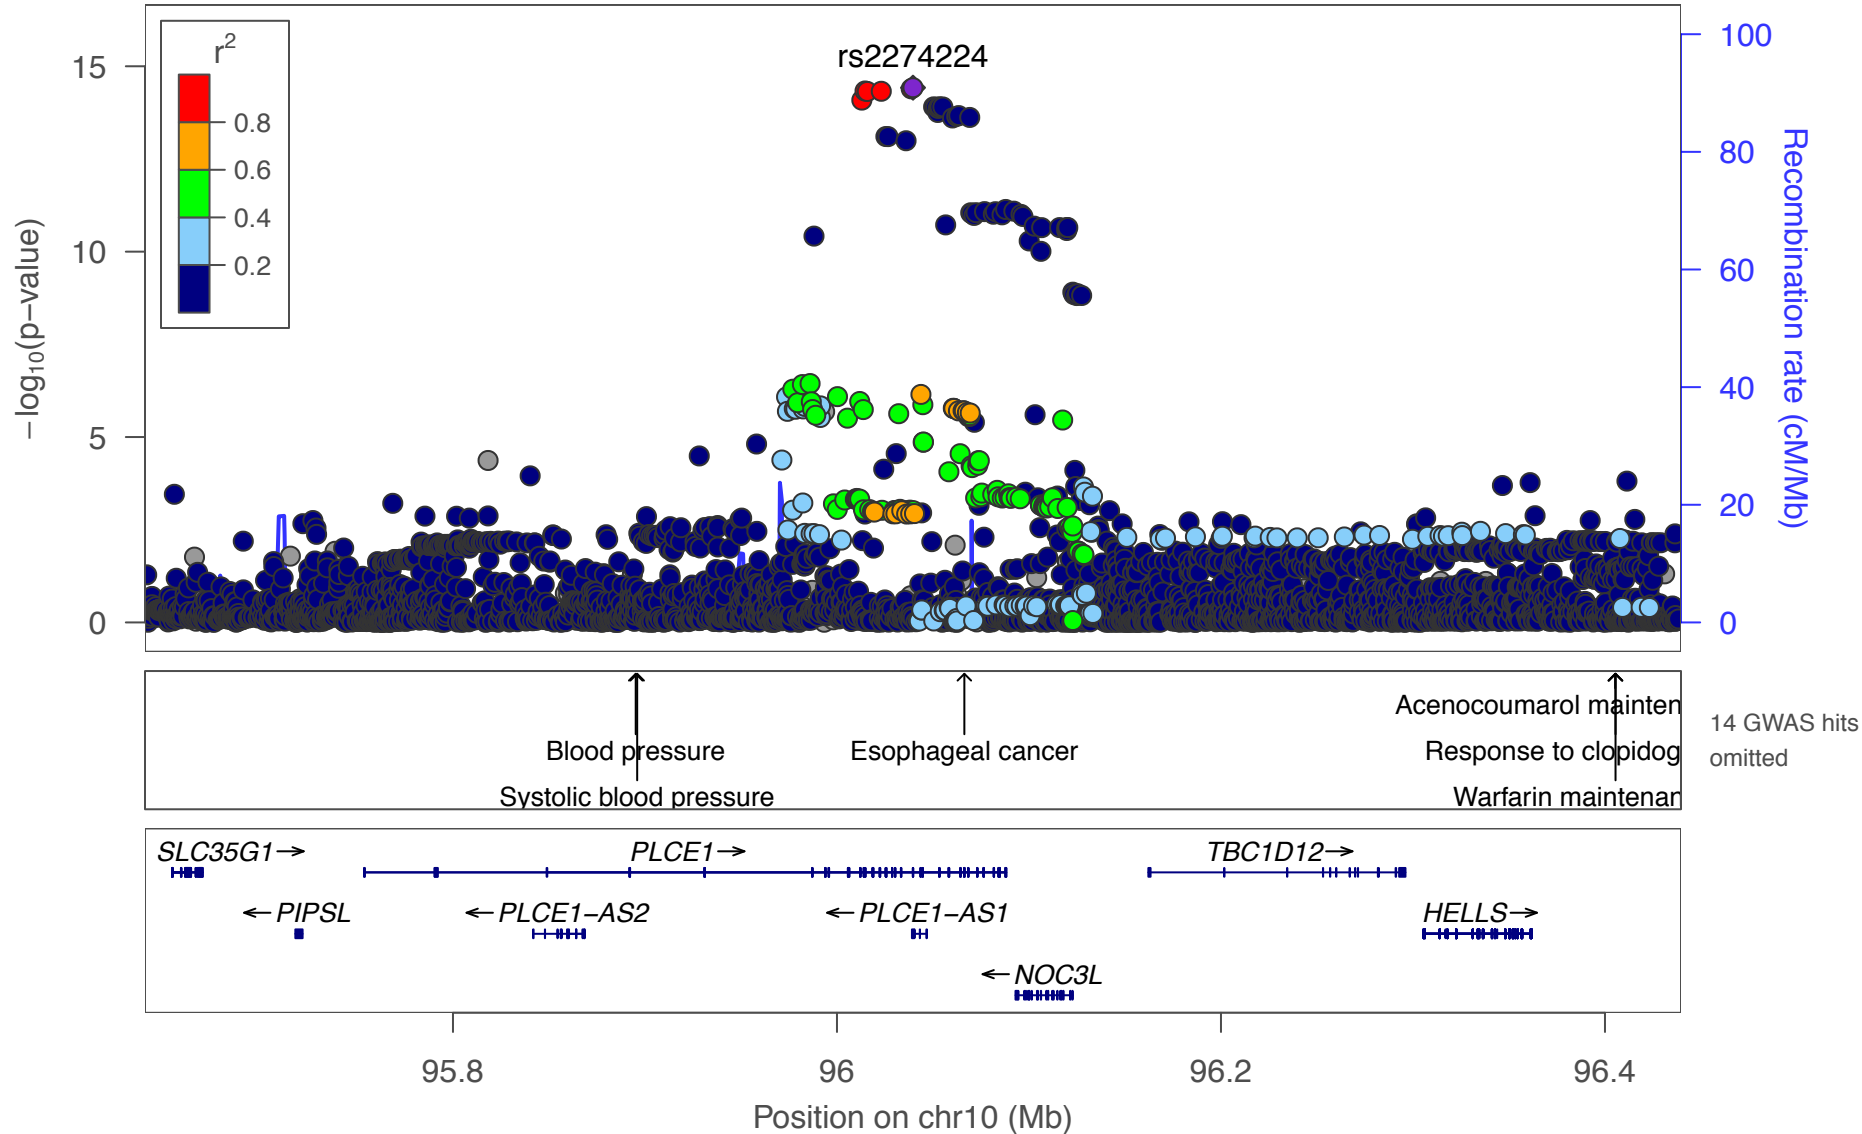



date: Thu Aug 17 18:47:34 2017

build: hg19

display range: chr10:95639597–96439597 [95639597–96439597]

hilite range: 0 – 0 [ 0 – 0 ]

reference SNP: chr10:96039597

number of SNPs plotted: 3187

min P.value: 3.78E–15 [chr10:96039597]

max P.value: 9.99E–1 [chr10:95718356]

omitted GWAS Hits: chr10:96.066341–Esophageal cancer, chr10:96.405502–Response to clopidogrel therapy

omitted GWAS Hits: NA, NA

GWAS Catalog SNPs in Region

| chr | pos (Mb) | trait                                                                        | snp         |
|-----|----------|------------------------------------------------------------------------------|-------------|
| 10  | 95.65996 | Cannabis dependence                                                          | rs146091982 |
| 10  | 95.89518 | Blood pressure                                                               | rs9663362   |
| 10  | 95.89594 | Systolic blood pressure                                                      | rs932764    |
| 10  | 95.89594 | Diastolic blood pressure                                                     | rs932764    |
| 10  | 95.89594 | Hypertension                                                                 | rs932764    |
| 10  | 95.90632 | Glucose homeostasis traits                                                   | rs1223629   |
| 10  | 96.01371 | Personality traits in bipolar disorder                                       | rs9419788   |
| 10  | 96.01462 | Migraine                                                                     | rs10786156  |
| 10  | 96.01903 | Migraine                                                                     | rs75473620  |
| 10  | 96.03598 | Sudden cardiac arrest                                                        | rs11187837  |
| 10  | 96.03631 | Vertical cup–disc ratio                                                      | rs7072574   |
| 10  | 96.05830 | Dengue shock syndrome                                                        | rs3765524   |
| 10  | 96.05830 | Esophageal cancer and gastric cancer                                         | rs3765524   |
| 10  | 96.05864 | Lifetime average cigarettes per day in chronic obstructive pulmonary disease | rs117607728 |
| 10  | 96.06634 | Esophageal cancer                                                            | rs2274223   |
| 10  | 96.06634 | Esophageal squamous cell carcinoma                                           | rs2274223   |
| 10  | 96.07037 | Esophageal cancer and gastric cancer                                         | rs3781264   |
| 10  | 96.40533 | Acenocoumarol maintenance dosage                                             | rs12772169  |
| 10  | 96.40550 | Response to clopidogrel therapy                                              | rs12777823  |
| 10  | 96.40550 | Warfarin maintenance dose                                                    | rs12777823  |

# NODEamps25\_0021

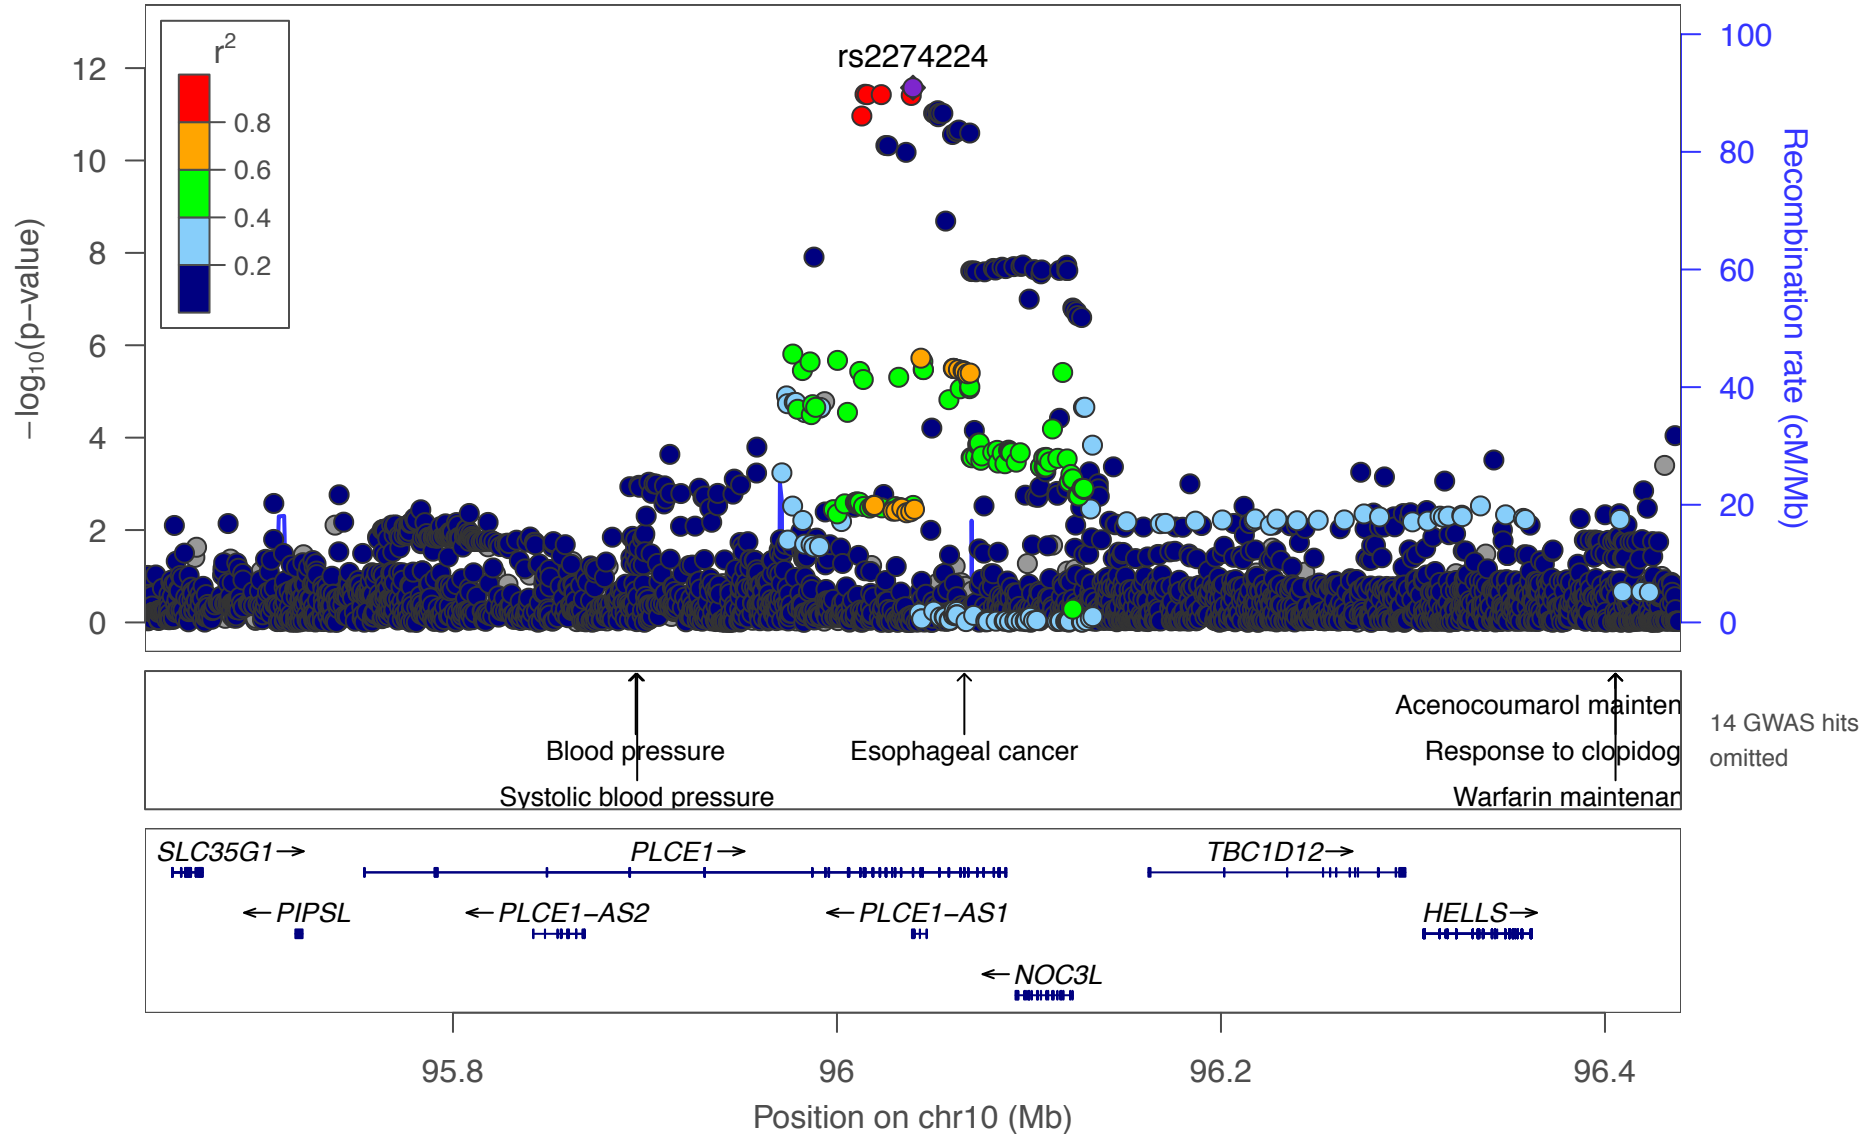

date: Thu Aug 17 18:49:43 2017

build: hg19

display range: chr10:95639597–96439597 [95639597–96439597]

hilite range: 0 – 0 [ 0 – 0 ]

reference SNP: chr10:96039597

number of SNPs plotted: 3187

min P.value: 2.65E–12 [chr10:96039597]

max P.value: 10E–1 [chr10:96036405]

omitted GWAS Hits: chr10:96.066341–Esophageal cancer, chr10:96.405502–Response to clopidogrel therapy

omitted GWAS Hits: NA, NA

GWAS Catalog SNPs in Region

| chr | pos (Mb) | trait                                                                        | snp         |
|-----|----------|------------------------------------------------------------------------------|-------------|
| 10  | 95.65996 | Cannabis dependence                                                          | rs146091982 |
| 10  | 95.89518 | Blood pressure                                                               | rs9663362   |
| 10  | 95.89594 | Systolic blood pressure                                                      | rs932764    |
| 10  | 95.89594 | Diastolic blood pressure                                                     | rs932764    |
| 10  | 95.89594 | Hypertension                                                                 | rs932764    |
| 10  | 95.90632 | Glucose homeostasis traits                                                   | rs1223629   |
| 10  | 96.01371 | Personality traits in bipolar disorder                                       | rs9419788   |
| 10  | 96.01462 | Migraine                                                                     | rs10786156  |
| 10  | 96.01903 | Migraine                                                                     | rs75473620  |
| 10  | 96.03598 | Sudden cardiac arrest                                                        | rs11187837  |
| 10  | 96.03631 | Vertical cup–disc ratio                                                      | rs7072574   |
| 10  | 96.05830 | Dengue shock syndrome                                                        | rs3765524   |
| 10  | 96.05830 | Esophageal cancer and gastric cancer                                         | rs3765524   |
| 10  | 96.05864 | Lifetime average cigarettes per day in chronic obstructive pulmonary disease | rs117607728 |
| 10  | 96.06634 | Esophageal cancer                                                            | rs2274223   |
| 10  | 96.06634 | Esophageal squamous cell carcinoma                                           | rs2274223   |
| 10  | 96.07037 | Esophageal cancer and gastric cancer                                         | rs3781264   |
| 10  | 96.40533 | Acenocoumarol maintenance dosage                                             | rs12772169  |
| 10  | 96.40550 | Response to clopidogrel therapy                                              | rs12777823  |
| 10  | 96.40550 | Warfarin maintenance dose                                                    | rs12777823  |

# NODEamps100\_0002

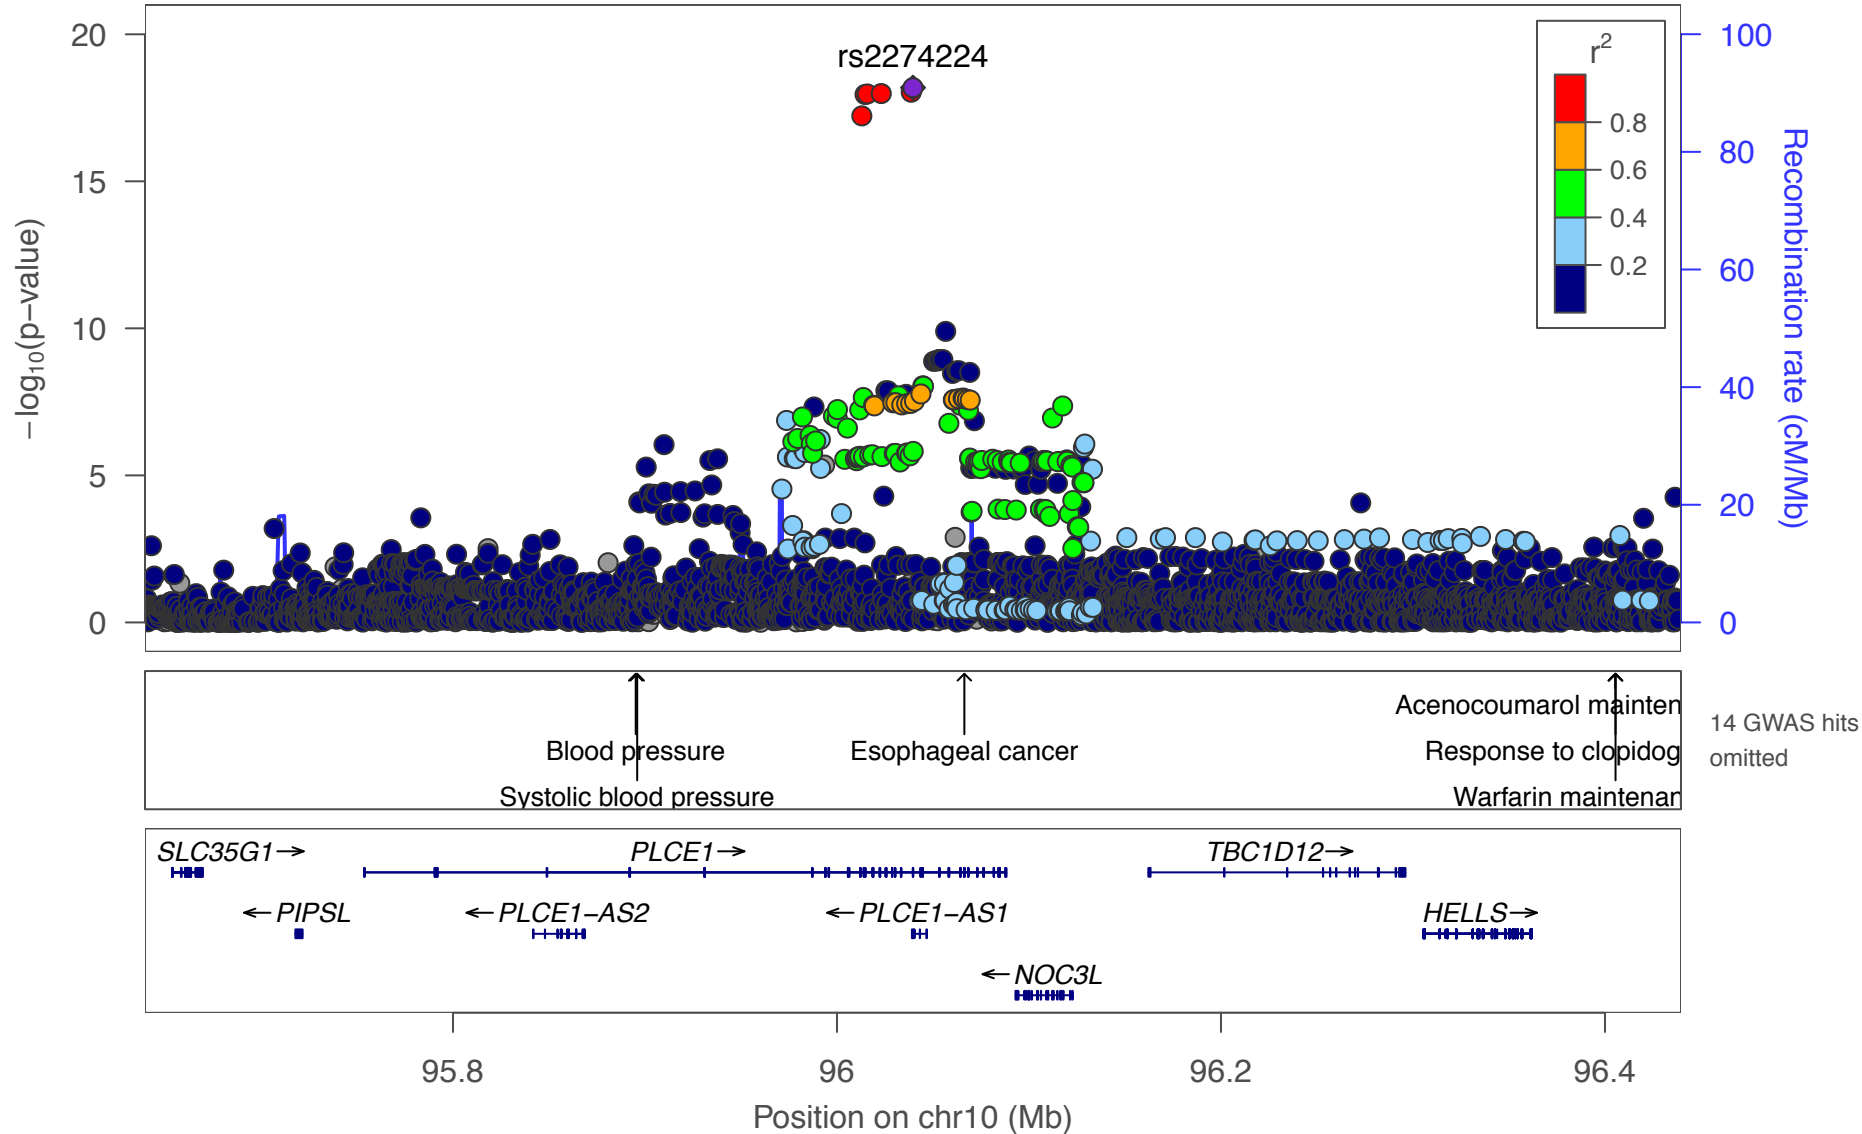

date: Thu Aug 17 18:49:43 2017

build: hg19

display range: chr10:95639597–96439597 [95639597–96439597]

hilite range: 0 – 0 [ 0 – 0 ]

reference SNP: chr10:96039597

number of SNPs plotted: 3187

min P.value: 6.55E–19 [chr10:96039597]

max P.value: 9.99E–1 [chr10:95693377]

omitted GWAS Hits: chr10:96.066341–Esophageal cancer, chr10:96.405502–Response to clopidogrel therapy

omitted GWAS Hits: NA, NA

GWAS Catalog SNPs in Region

| chr | pos (Mb) | trait                                                                        | snp         |
|-----|----------|------------------------------------------------------------------------------|-------------|
| 10  | 95.65996 | Cannabis dependence                                                          | rs146091982 |
| 10  | 95.89518 | Blood pressure                                                               | rs9663362   |
| 10  | 95.89594 | Systolic blood pressure                                                      | rs932764    |
| 10  | 95.89594 | Diastolic blood pressure                                                     | rs932764    |
| 10  | 95.89594 | Hypertension                                                                 | rs932764    |
| 10  | 95.90632 | Glucose homeostasis traits                                                   | rs1223629   |
| 10  | 96.01371 | Personality traits in bipolar disorder                                       | rs9419788   |
| 10  | 96.01462 | Migraine                                                                     | rs10786156  |
| 10  | 96.01903 | Migraine                                                                     | rs75473620  |
| 10  | 96.03598 | Sudden cardiac arrest                                                        | rs11187837  |
| 10  | 96.03631 | Vertical cup–disc ratio                                                      | rs7072574   |
| 10  | 96.05830 | Dengue shock syndrome                                                        | rs3765524   |
| 10  | 96.05830 | Esophageal cancer and gastric cancer                                         | rs3765524   |
| 10  | 96.05864 | Lifetime average cigarettes per day in chronic obstructive pulmonary disease | rs117607728 |
| 10  | 96.06634 | Esophageal cancer                                                            | rs2274223   |
| 10  | 96.06634 | Esophageal squamous cell carcinoma                                           | rs2274223   |
| 10  | 96.07037 | Esophageal cancer and gastric cancer                                         | rs3781264   |
| 10  | 96.40533 | Acenocoumarol maintenance dosage                                             | rs12772169  |
| 10  | 96.40550 | Response to clopidogrel therapy                                              | rs12777823  |
| 10  | 96.40550 | Warfarin maintenance dose                                                    | rs12777823  |



# NODEamps100\_0012

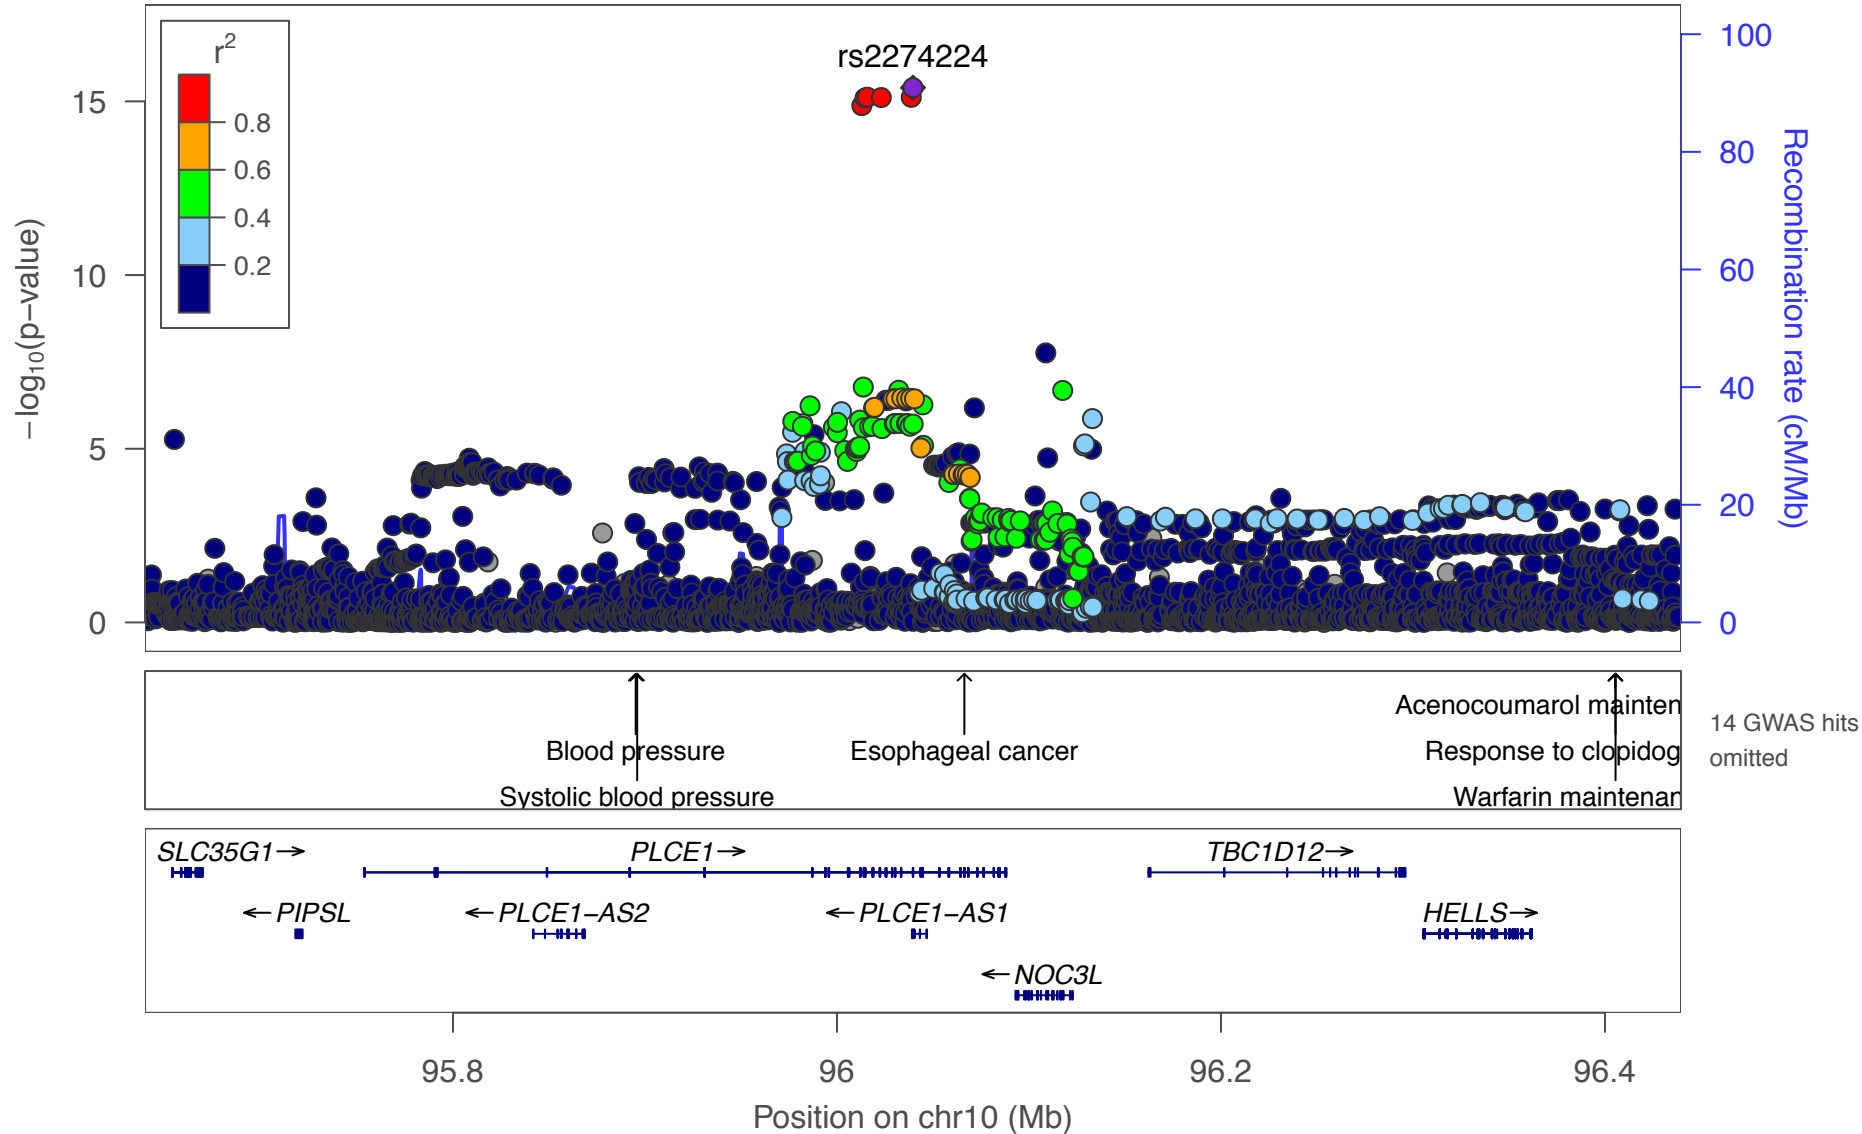

date: Thu Aug 17 18:49:43 2017

build: hg19

display range: chr10:95639597–96439597 [95639597–96439597]

hilite range: 0 – 0 [ 0 – 0 ]

reference SNP: chr10:96039597

number of SNPs plotted: 3187

min P.value: 4.04E–16 [chr10:96039597]

max P.value: 10E–1 [chr10:95800687]

omitted GWAS Hits: chr10:96.066341–Esophageal cancer, chr10:96.405502–Response to clopidogrel therapy

omitted GWAS Hits: NA, NA

GWAS Catalog SNPs in Region

| chr | pos (Mb) | trait                                                                        | snp         |
|-----|----------|------------------------------------------------------------------------------|-------------|
| 10  | 95.65996 | Cannabis dependence                                                          | rs146091982 |
| 10  | 95.89518 | Blood pressure                                                               | rs9663362   |
| 10  | 95.89594 | Systolic blood pressure                                                      | rs932764    |
| 10  | 95.89594 | Diastolic blood pressure                                                     | rs932764    |
| 10  | 95.89594 | Hypertension                                                                 | rs932764    |
| 10  | 95.90632 | Glucose homeostasis traits                                                   | rs1223629   |
| 10  | 96.01371 | Personality traits in bipolar disorder                                       | rs9419788   |
| 10  | 96.01462 | Migraine                                                                     | rs10786156  |
| 10  | 96.01903 | Migraine                                                                     | rs75473620  |
| 10  | 96.03598 | Sudden cardiac arrest                                                        | rs11187837  |
| 10  | 96.03631 | Vertical cup–disc ratio                                                      | rs7072574   |
| 10  | 96.05830 | Dengue shock syndrome                                                        | rs3765524   |
| 10  | 96.05830 | Esophageal cancer and gastric cancer                                         | rs3765524   |
| 10  | 96.05864 | Lifetime average cigarettes per day in chronic obstructive pulmonary disease | rs117607728 |
| 10  | 96.06634 | Esophageal cancer                                                            | rs2274223   |
| 10  | 96.06634 | Esophageal squamous cell carcinoma                                           | rs2274223   |
| 10  | 96.07037 | Esophageal cancer and gastric cancer                                         | rs3781264   |
| 10  | 96.40533 | Acenocoumarol maintenance dosage                                             | rs12772169  |
| 10  | 96.40550 | Response to clopidogrel therapy                                              | rs12777823  |
| 10  | 96.40550 | Warfarin maintenance dose                                                    | rs12777823  |

# NODEamps100\_0015

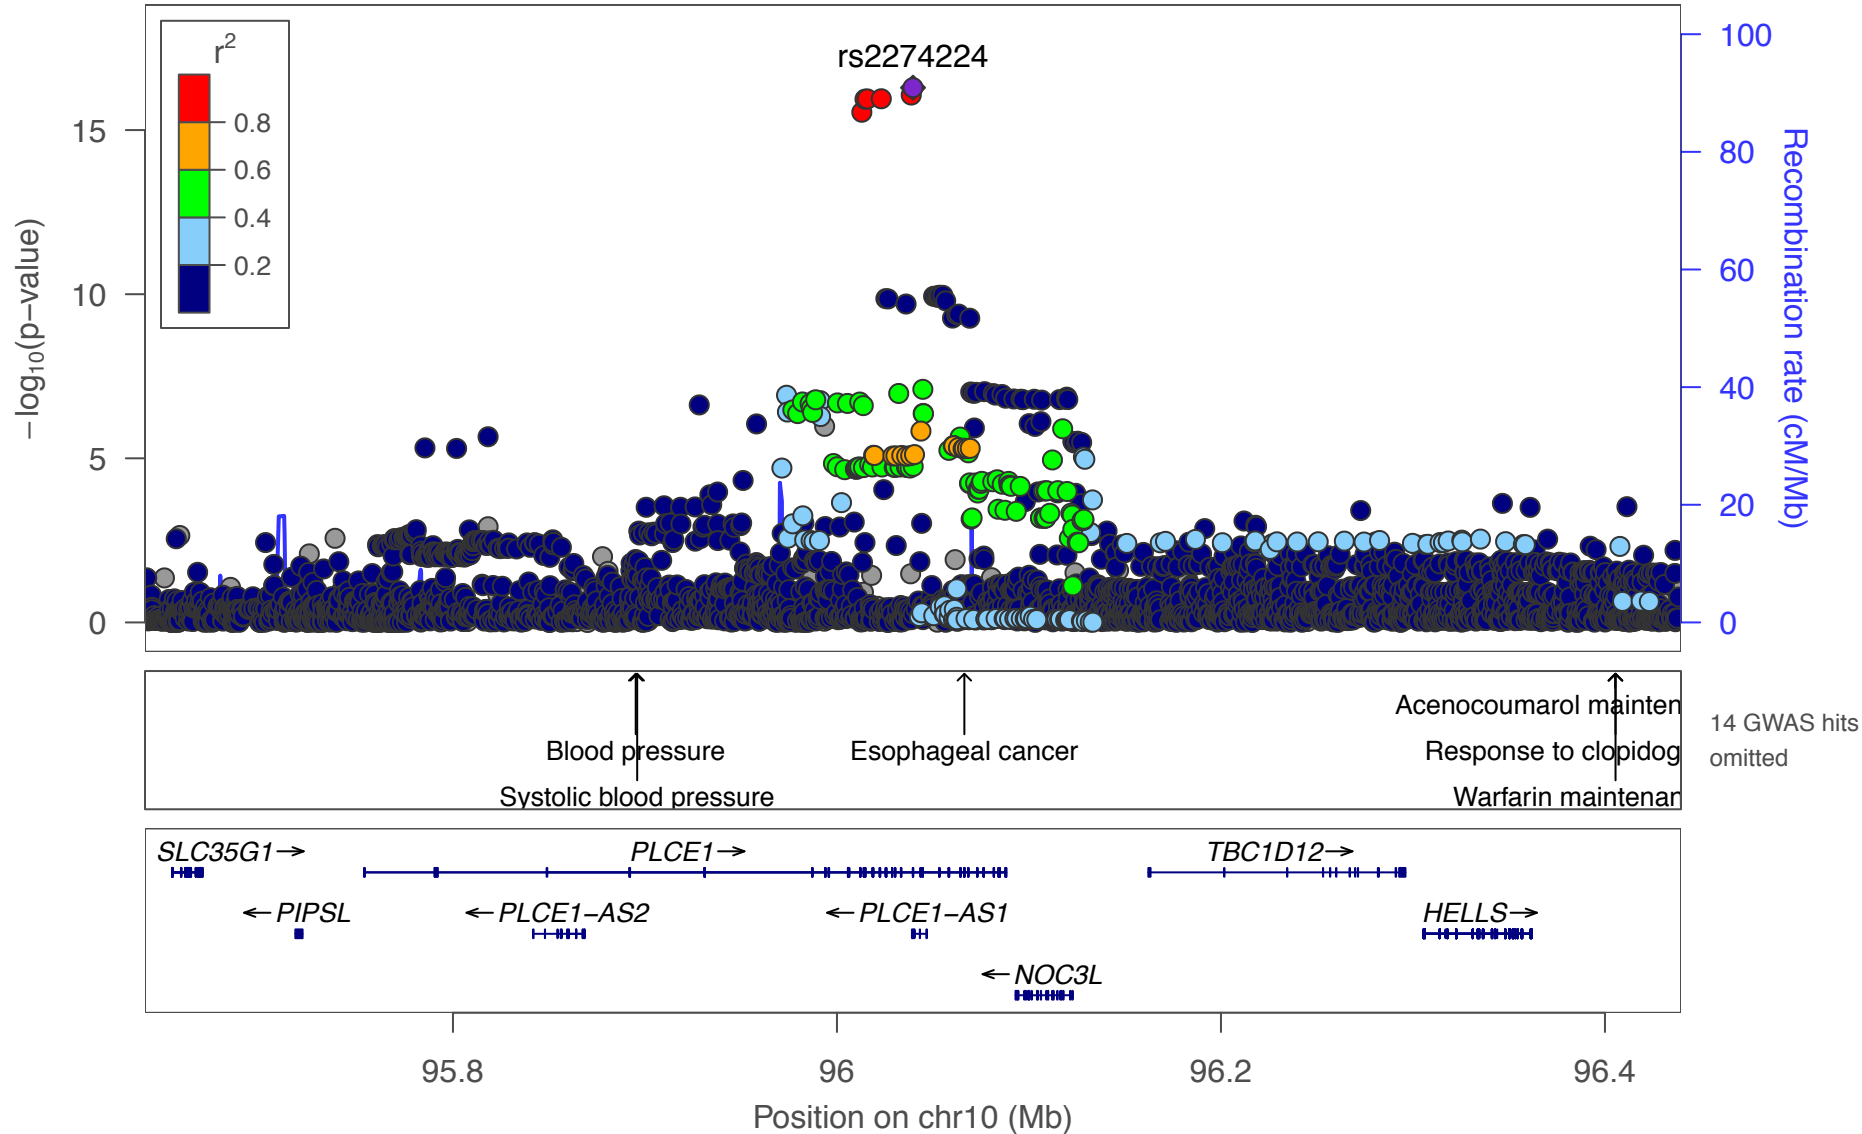

date: Thu Aug 17 18:43:21 2017

build: hg19

display range: chr10:95639597–96439597 [95639597–96439597]

hilite range: 0 – 0 [ 0 – 0 ]

reference SNP: chr10:96039597

number of SNPs plotted: 3187

min P.value: 5.11E–17 [chr10:96039597]

max P.value: 10E–1 [chr10:95769538]

omitted GWAS Hits: chr10:96.066341–Esophageal cancer, chr10:96.405502–Response to clopidogrel therapy

omitted GWAS Hits: NA, NA

GWAS Catalog SNPs in Region

| chr | pos (Mb) | trait                                                                        | snp         |
|-----|----------|------------------------------------------------------------------------------|-------------|
| 10  | 95.65996 | Cannabis dependence                                                          | rs146091982 |
| 10  | 95.89518 | Blood pressure                                                               | rs9663362   |
| 10  | 95.89594 | Systolic blood pressure                                                      | rs932764    |
| 10  | 95.89594 | Diastolic blood pressure                                                     | rs932764    |
| 10  | 95.89594 | Hypertension                                                                 | rs932764    |
| 10  | 95.90632 | Glucose homeostasis traits                                                   | rs1223629   |
| 10  | 96.01371 | Personality traits in bipolar disorder                                       | rs9419788   |
| 10  | 96.01462 | Migraine                                                                     | rs10786156  |
| 10  | 96.01903 | Migraine                                                                     | rs75473620  |
| 10  | 96.03598 | Sudden cardiac arrest                                                        | rs11187837  |
| 10  | 96.03631 | Vertical cup–disc ratio                                                      | rs7072574   |
| 10  | 96.05830 | Dengue shock syndrome                                                        | rs3765524   |
| 10  | 96.05830 | Esophageal cancer and gastric cancer                                         | rs3765524   |
| 10  | 96.05864 | Lifetime average cigarettes per day in chronic obstructive pulmonary disease | rs117607728 |
| 10  | 96.06634 | Esophageal cancer                                                            | rs2274223   |
| 10  | 96.06634 | Esophageal squamous cell carcinoma                                           | rs2274223   |
| 10  | 96.07037 | Esophageal cancer and gastric cancer                                         | rs3781264   |
| 10  | 96.40533 | Acenocoumarol maintenance dosage                                             | rs12772169  |
| 10  | 96.40550 | Response to clopidogrel therapy                                              | rs12777823  |
| 10  | 96.40550 | Warfarin maintenance dose                                                    | rs12777823  |

# NODEamps100\_0019

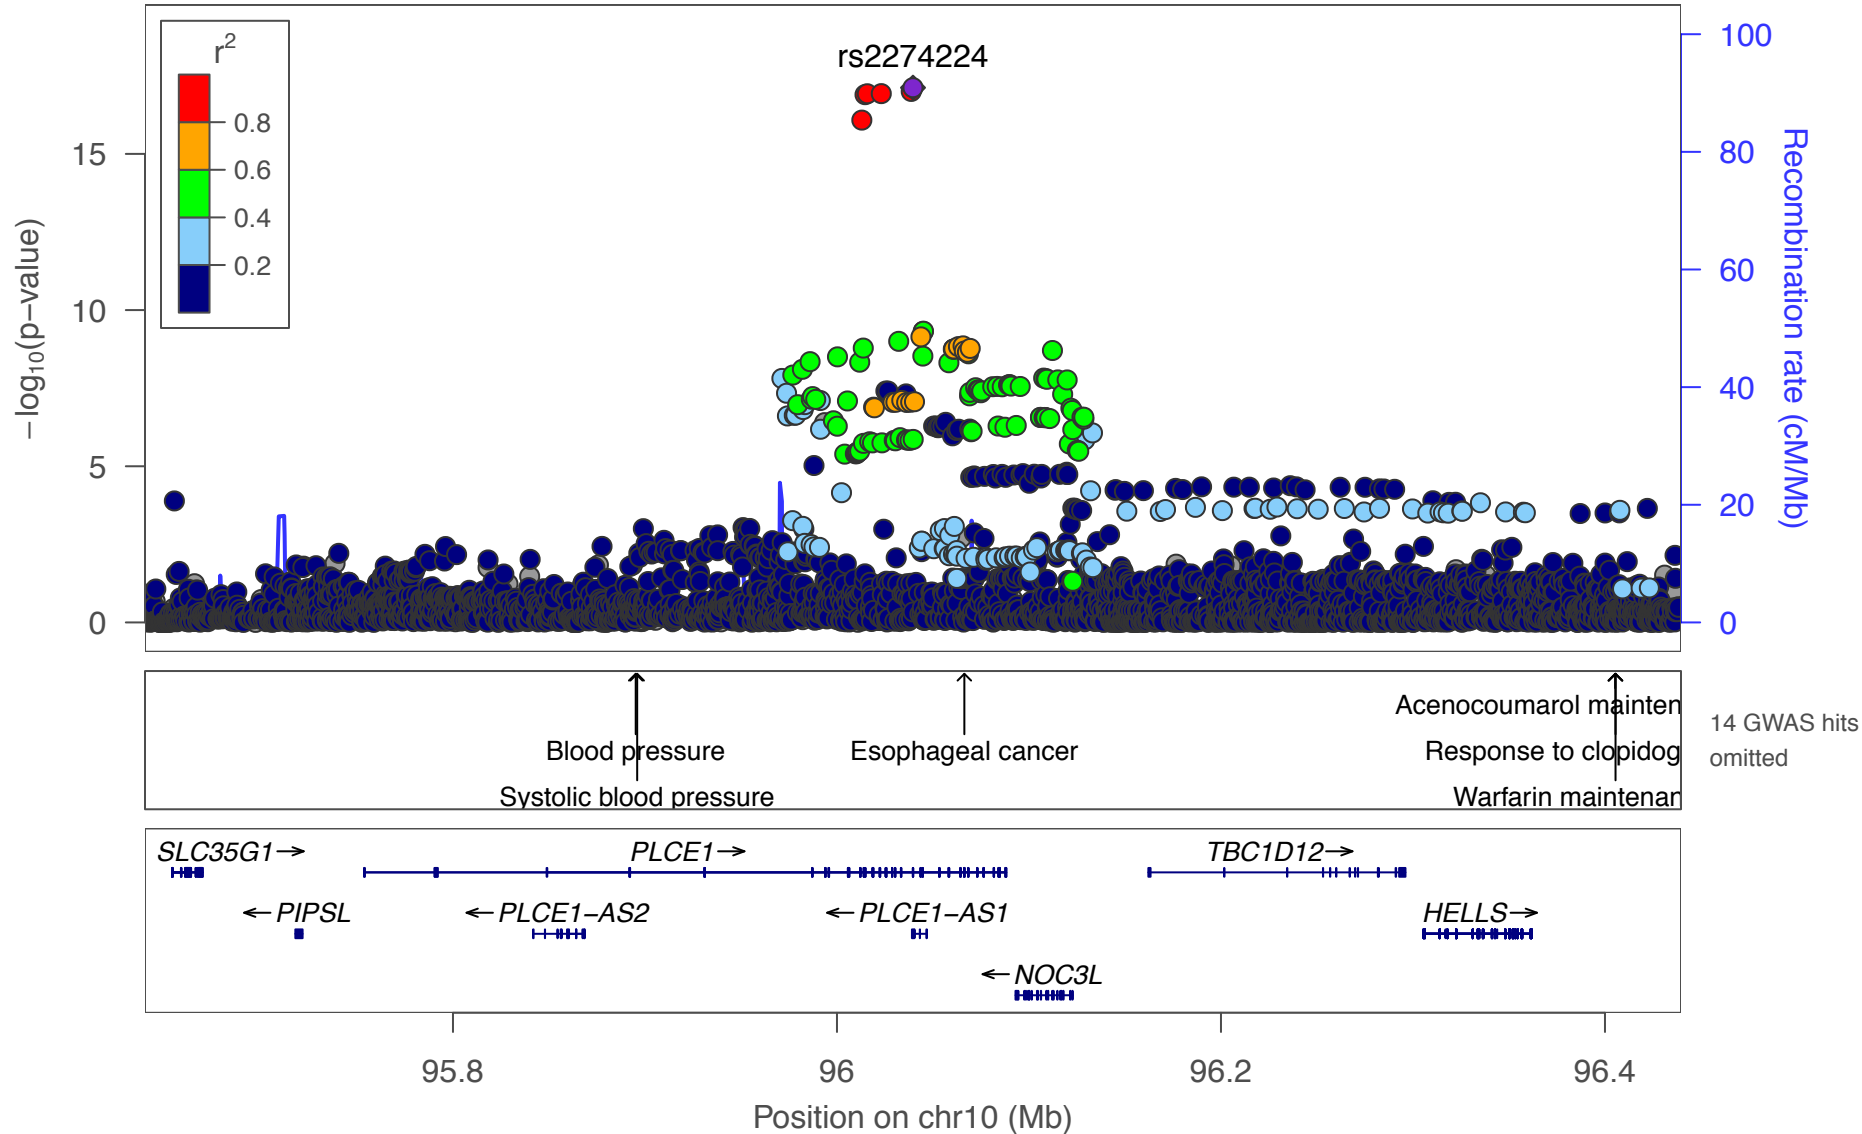

date: Thu Aug 17 18:47:36 2017

build: hg19

display range: chr10:95639597–96439597 [95639597–96439597]

hilite range: 0 – 0 [ 0 – 0 ]

reference SNP: chr10:96039597

number of SNPs plotted: 3187

min P.value: 7.59E–18 [chr10:96039597]

max P.value: 9.99E–1 [chr10:96193476]

omitted GWAS Hits: chr10:96.066341–Esophageal cancer, chr10:96.405502–Response to clopidogrel therapy

omitted GWAS Hits: NA, NA



GWAS Catalog SNPs in Region

| chr | pos (Mb) | trait                                                                        | snp         |
|-----|----------|------------------------------------------------------------------------------|-------------|
| 10  | 95.65996 | Cannabis dependence                                                          | rs146091982 |
| 10  | 95.89518 | Blood pressure                                                               | rs9663362   |
| 10  | 95.89594 | Systolic blood pressure                                                      | rs932764    |
| 10  | 95.89594 | Diastolic blood pressure                                                     | rs932764    |
| 10  | 95.89594 | Hypertension                                                                 | rs932764    |
| 10  | 95.90632 | Glucose homeostasis traits                                                   | rs1223629   |
| 10  | 96.01371 | Personality traits in bipolar disorder                                       | rs9419788   |
| 10  | 96.01462 | Migraine                                                                     | rs10786156  |
| 10  | 96.01903 | Migraine                                                                     | rs75473620  |
| 10  | 96.03598 | Sudden cardiac arrest                                                        | rs11187837  |
| 10  | 96.03631 | Vertical cup–disc ratio                                                      | rs7072574   |
| 10  | 96.05830 | Dengue shock syndrome                                                        | rs3765524   |
| 10  | 96.05830 | Esophageal cancer and gastric cancer                                         | rs3765524   |
| 10  | 96.05864 | Lifetime average cigarettes per day in chronic obstructive pulmonary disease | rs117607728 |
| 10  | 96.06634 | Esophageal cancer                                                            | rs2274223   |
| 10  | 96.06634 | Esophageal squamous cell carcinoma                                           | rs2274223   |
| 10  | 96.07037 | Esophageal cancer and gastric cancer                                         | rs3781264   |
| 10  | 96.40533 | Acenocoumarol maintenance dosage                                             | rs12772169  |
| 10  | 96.40550 | Response to clopidogrel therapy                                              | rs12777823  |
| 10  | 96.40550 | Warfarin maintenance dose                                                    | rs12777823  |

# NODEamps100\_0026

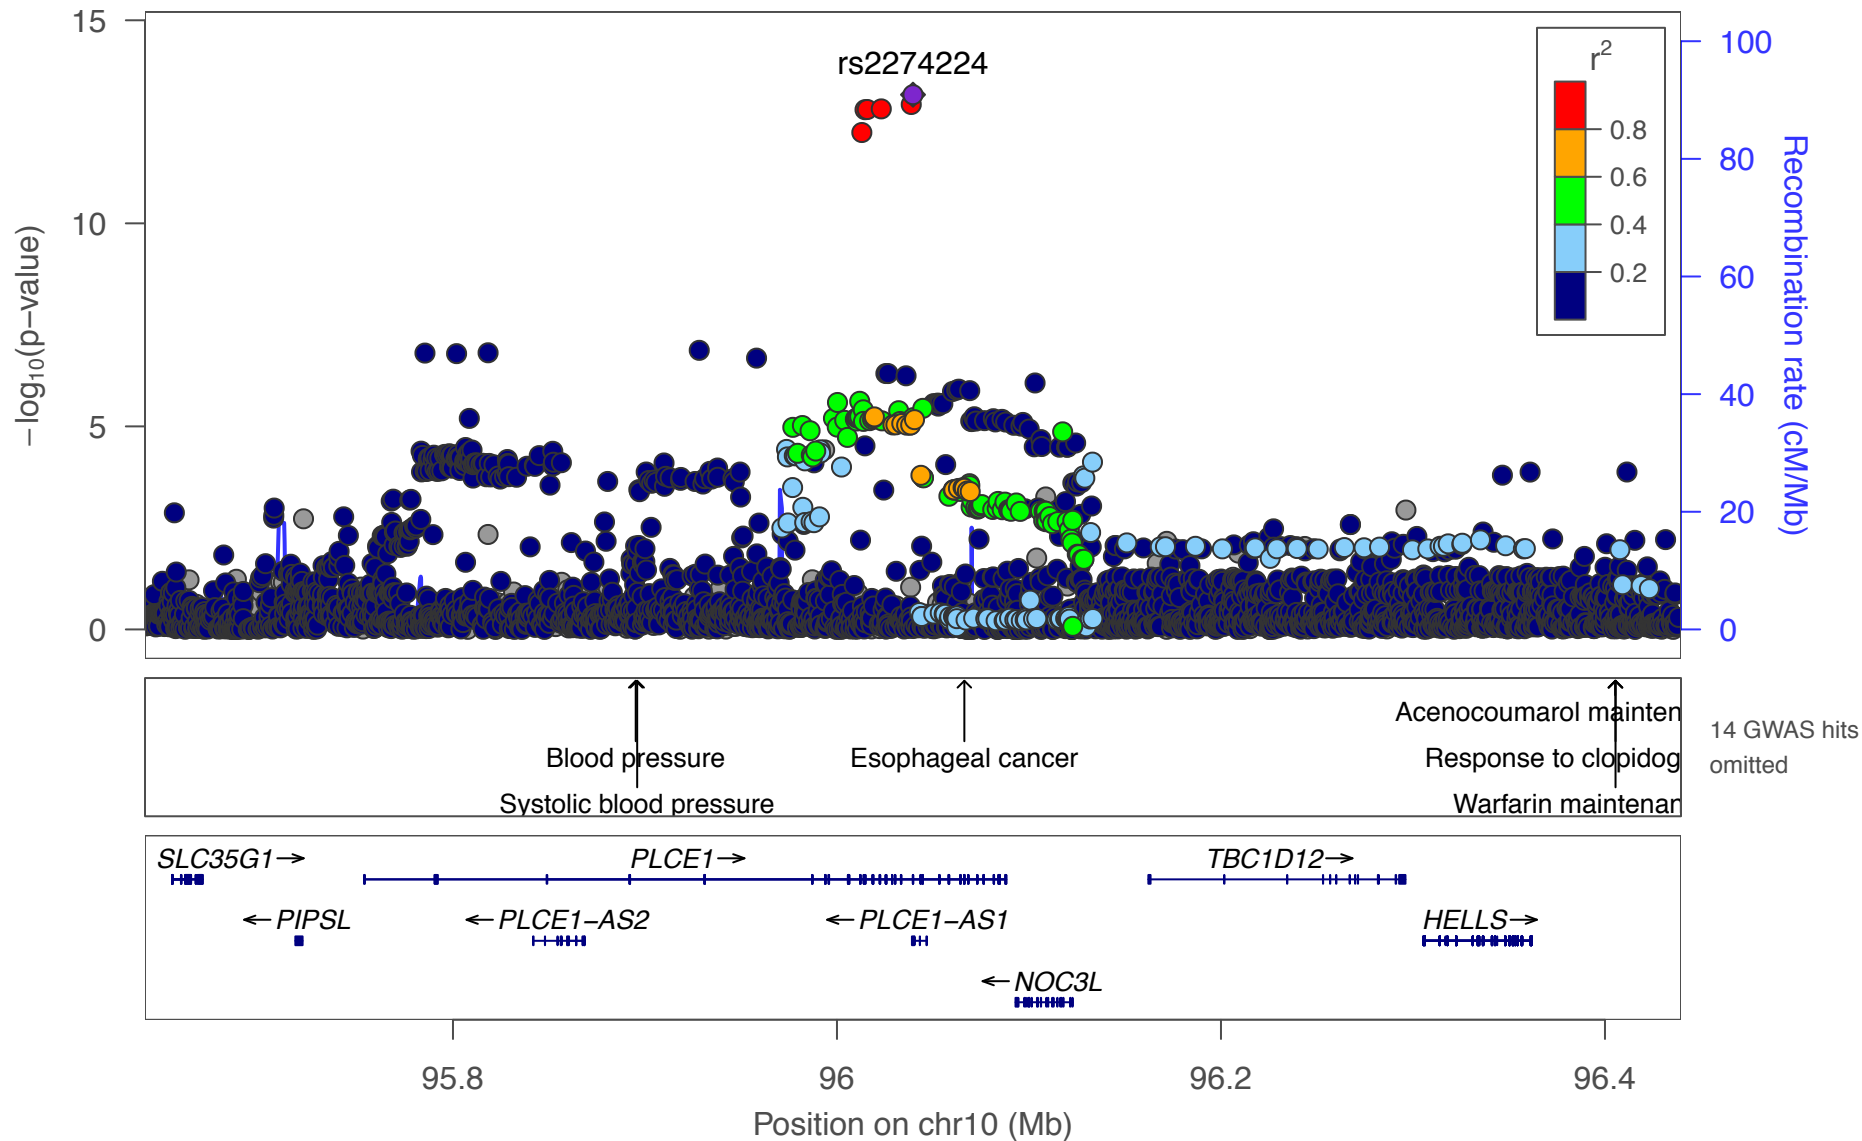

date: Thu Aug 17 18:43:22 2017

build: hg19

display range: chr10:95639597–96439597 [95639597–96439597]

hilite range: 0 – 0 [ 0 – 0 ]

reference SNP: chr10:96039597

number of SNPs plotted: 3187

min P.value: 6.79E–14 [chr10:96039597]

max P.value: 10E–1 [chr10:96106408]

omitted GWAS Hits: chr10:96.066341–Esophageal cancer, chr10:96.405502–Response to clopidogrel therapy

omitted GWAS Hits: NA, NA

GWAS Catalog SNPs in Region

| chr | pos (Mb) | trait                                                                        | snp         |
|-----|----------|------------------------------------------------------------------------------|-------------|
| 10  | 95.65996 | Cannabis dependence                                                          | rs146091982 |
| 10  | 95.89518 | Blood pressure                                                               | rs9663362   |
| 10  | 95.89594 | Systolic blood pressure                                                      | rs932764    |
| 10  | 95.89594 | Diastolic blood pressure                                                     | rs932764    |
| 10  | 95.89594 | Hypertension                                                                 | rs932764    |
| 10  | 95.90632 | Glucose homeostasis traits                                                   | rs1223629   |
| 10  | 96.01371 | Personality traits in bipolar disorder                                       | rs9419788   |
| 10  | 96.01462 | Migraine                                                                     | rs10786156  |
| 10  | 96.01903 | Migraine                                                                     | rs75473620  |
| 10  | 96.03598 | Sudden cardiac arrest                                                        | rs11187837  |
| 10  | 96.03631 | Vertical cup–disc ratio                                                      | rs7072574   |
| 10  | 96.05830 | Dengue shock syndrome                                                        | rs3765524   |
| 10  | 96.05830 | Esophageal cancer and gastric cancer                                         | rs3765524   |
| 10  | 96.05864 | Lifetime average cigarettes per day in chronic obstructive pulmonary disease | rs117607728 |
| 10  | 96.06634 | Esophageal cancer                                                            | rs2274223   |
| 10  | 96.06634 | Esophageal squamous cell carcinoma                                           | rs2274223   |
| 10  | 96.07037 | Esophageal cancer and gastric cancer                                         | rs3781264   |
| 10  | 96.40533 | Acenocoumarol maintenance dosage                                             | rs12772169  |
| 10  | 96.40550 | Response to clopidogrel therapy                                              | rs12777823  |
| 10  | 96.40550 | Warfarin maintenance dose                                                    | rs12777823  |

# NODEamps100\_0035

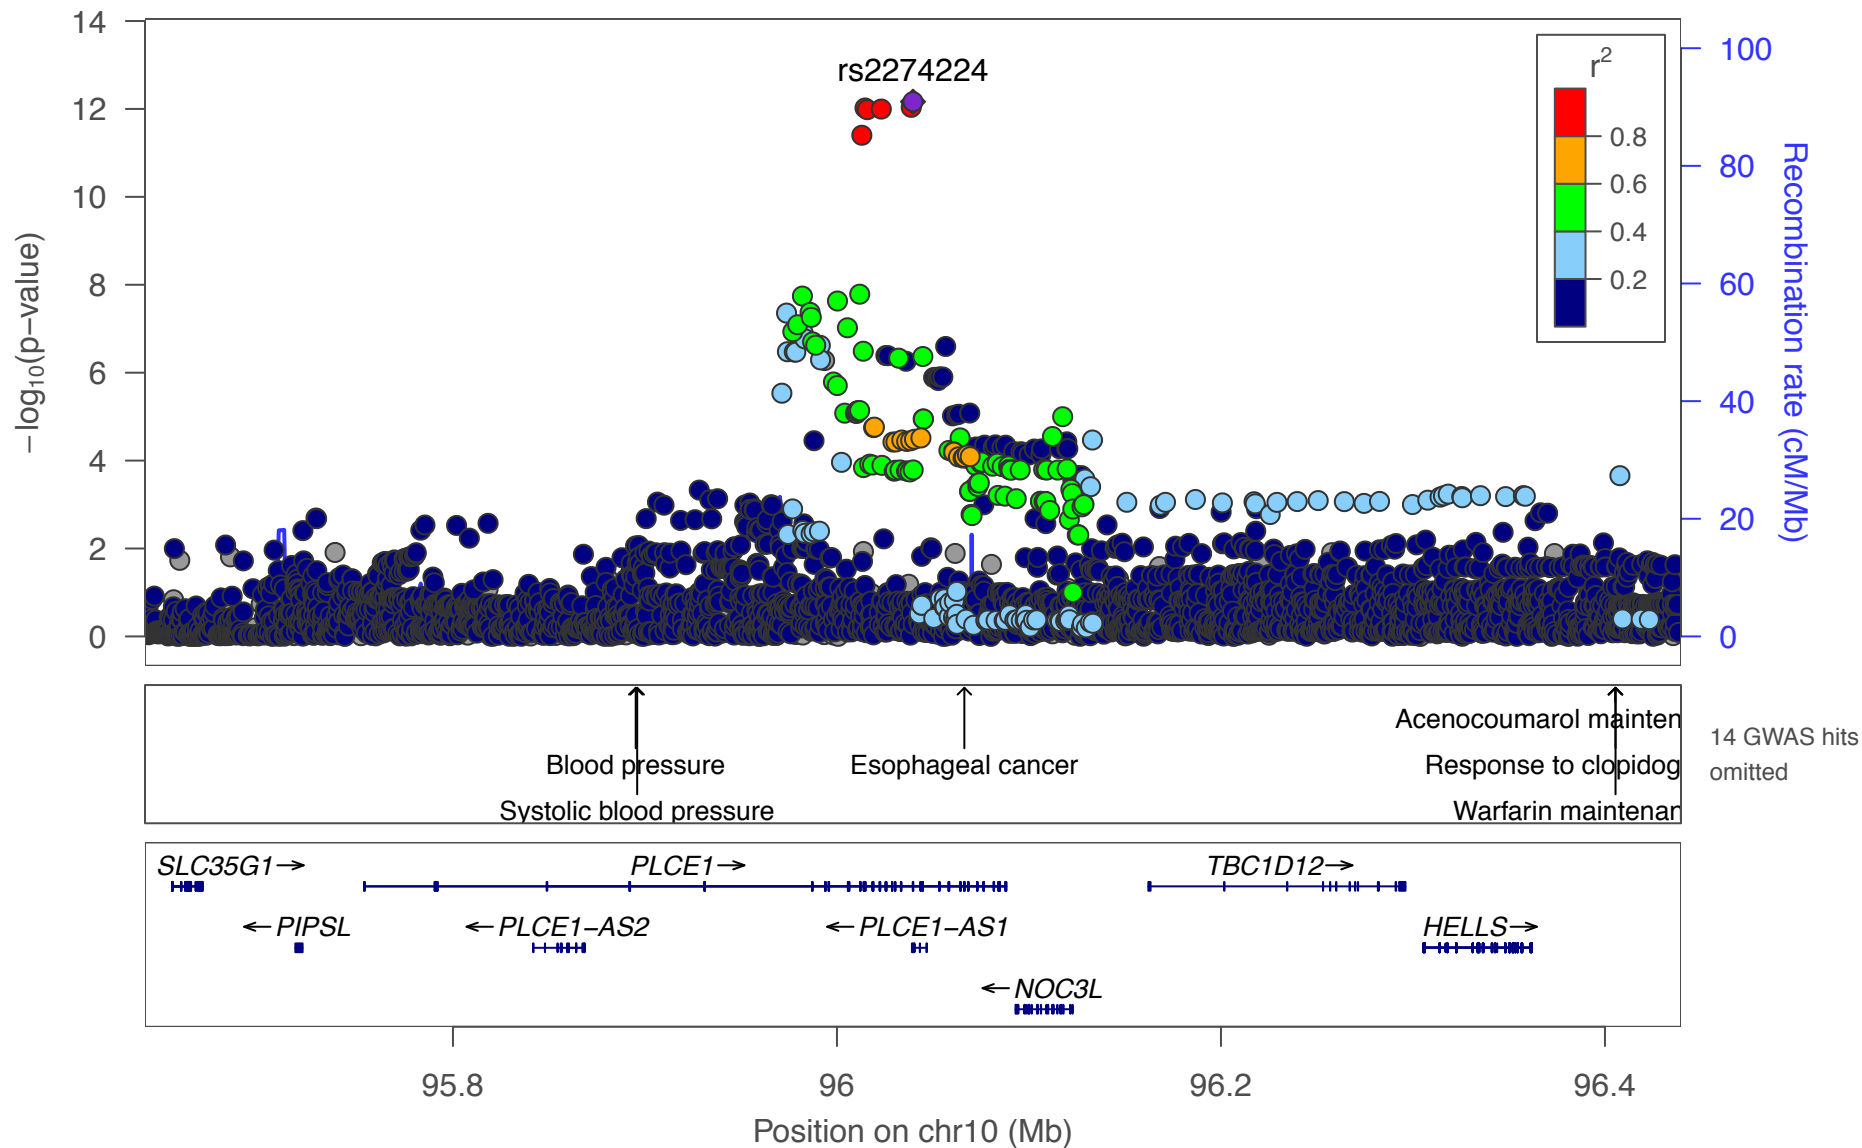

date: Thu Aug 17 18:47:34 2017

build: hg19

display range: chr10:95639597–96439597 [95639597–96439597]

hilite range: 0 – 0 [ 0 – 0 ]

reference SNP: chr10:96039597

number of SNPs plotted: 3187

min P.value: 6.84E–13 [chr10:96039597]

max P.value: 9.99E–1 [chr10:96380933]

omitted GWAS Hits: chr10:96.066341–Esophageal cancer, chr10:96.405502–Response to clopidogrel therapy

omitted GWAS Hits: NA, NA

GWAS Catalog SNPs in Region

| chr | pos (Mb) | trait                                                                        | snp         |
|-----|----------|------------------------------------------------------------------------------|-------------|
| 10  | 95.65996 | Cannabis dependence                                                          | rs146091982 |
| 10  | 95.89518 | Blood pressure                                                               | rs9663362   |
| 10  | 95.89594 | Systolic blood pressure                                                      | rs932764    |
| 10  | 95.89594 | Diastolic blood pressure                                                     | rs932764    |
| 10  | 95.89594 | Hypertension                                                                 | rs932764    |
| 10  | 95.90632 | Glucose homeostasis traits                                                   | rs1223629   |
| 10  | 96.01371 | Personality traits in bipolar disorder                                       | rs9419788   |
| 10  | 96.01462 | Migraine                                                                     | rs10786156  |
| 10  | 96.01903 | Migraine                                                                     | rs75473620  |
| 10  | 96.03598 | Sudden cardiac arrest                                                        | rs11187837  |
| 10  | 96.03631 | Vertical cup–disc ratio                                                      | rs7072574   |
| 10  | 96.05830 | Dengue shock syndrome                                                        | rs3765524   |
| 10  | 96.05830 | Esophageal cancer and gastric cancer                                         | rs3765524   |
| 10  | 96.05864 | Lifetime average cigarettes per day in chronic obstructive pulmonary disease | rs117607728 |
| 10  | 96.06634 | Esophageal cancer                                                            | rs2274223   |
| 10  | 96.06634 | Esophageal squamous cell carcinoma                                           | rs2274223   |
| 10  | 96.07037 | Esophageal cancer and gastric cancer                                         | rs3781264   |
| 10  | 96.40533 | Acenocoumarol maintenance dosage                                             | rs12772169  |
| 10  | 96.40550 | Response to clopidogrel therapy                                              | rs12777823  |
| 10  | 96.40550 | Warfarin maintenance dose                                                    | rs12777823  |

# NODEamps100\_0040

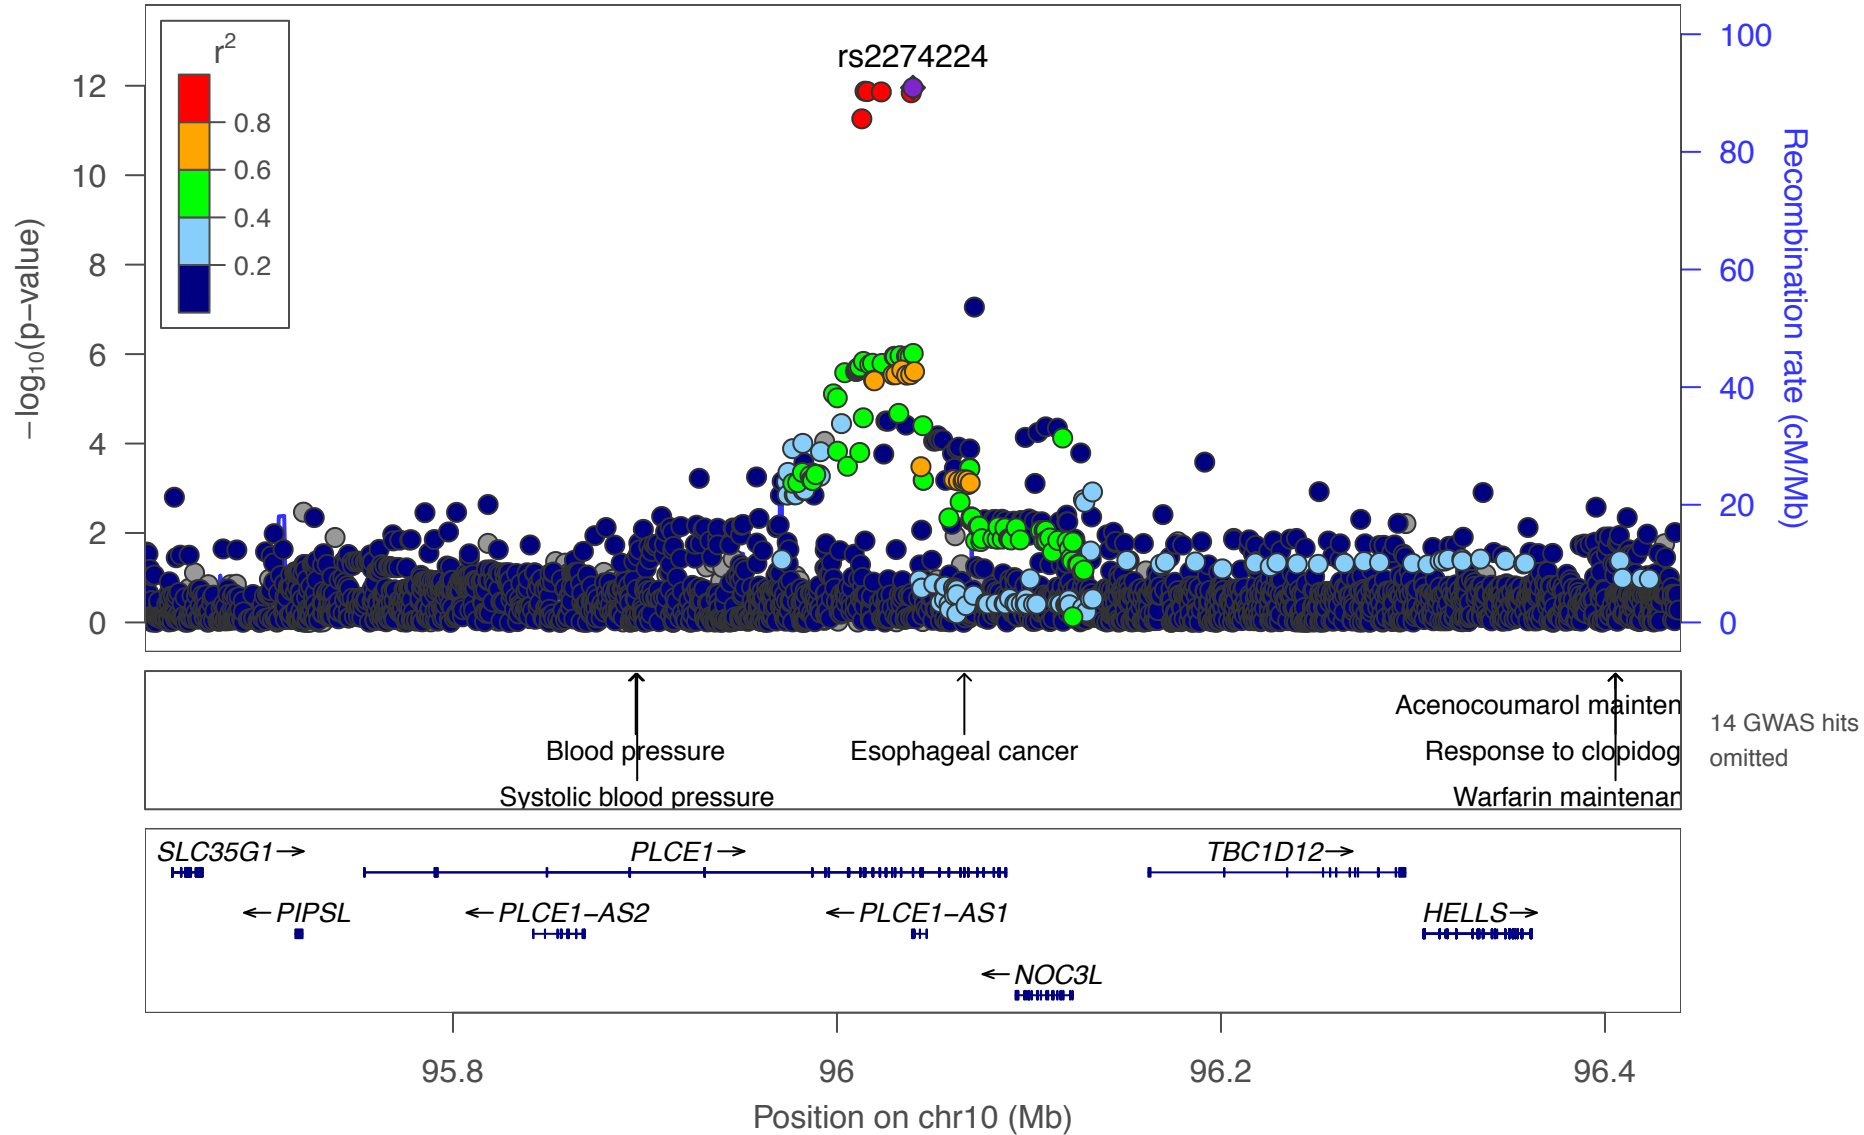



date: Thu Aug 17 18:50:05 2017

build: hg19

display range: chr10:95639597–96439597 [95639597–96439597]

hilite range: 0 – 0 [ 0 – 0 ]

reference SNP: chr10:96039597

number of SNPs plotted: 3187

min P.value: 1.1E–12 [chr10:96039597]

max P.value: 10E–1 [chr10:95829334]

omitted GWAS Hits: chr10:96.066341–Esophageal cancer, chr10:96.405502–Response to clopidogrel therapy

omitted GWAS Hits: NA, NA

GWAS Catalog SNPs in Region

| chr | pos (Mb) | trait                                                                        | snp         |
|-----|----------|------------------------------------------------------------------------------|-------------|
| 10  | 95.65996 | Cannabis dependence                                                          | rs146091982 |
| 10  | 95.89518 | Blood pressure                                                               | rs9663362   |
| 10  | 95.89594 | Systolic blood pressure                                                      | rs932764    |
| 10  | 95.89594 | Diastolic blood pressure                                                     | rs932764    |
| 10  | 95.89594 | Hypertension                                                                 | rs932764    |
| 10  | 95.90632 | Glucose homeostasis traits                                                   | rs1223629   |
| 10  | 96.01371 | Personality traits in bipolar disorder                                       | rs9419788   |
| 10  | 96.01462 | Migraine                                                                     | rs10786156  |
| 10  | 96.01903 | Migraine                                                                     | rs75473620  |
| 10  | 96.03598 | Sudden cardiac arrest                                                        | rs11187837  |
| 10  | 96.03631 | Vertical cup–disc ratio                                                      | rs7072574   |
| 10  | 96.05830 | Dengue shock syndrome                                                        | rs3765524   |
| 10  | 96.05830 | Esophageal cancer and gastric cancer                                         | rs3765524   |
| 10  | 96.05864 | Lifetime average cigarettes per day in chronic obstructive pulmonary disease | rs117607728 |
| 10  | 96.06634 | Esophageal cancer                                                            | rs2274223   |
| 10  | 96.06634 | Esophageal squamous cell carcinoma                                           | rs2274223   |
| 10  | 96.07037 | Esophageal cancer and gastric cancer                                         | rs3781264   |
| 10  | 96.40533 | Acenocoumarol maintenance dosage                                             | rs12772169  |
| 10  | 96.40550 | Response to clopidogrel therapy                                              | rs12777823  |
| 10  | 96.40550 | Warfarin maintenance dose                                                    | rs12777823  |

# NODEamps100\_0044

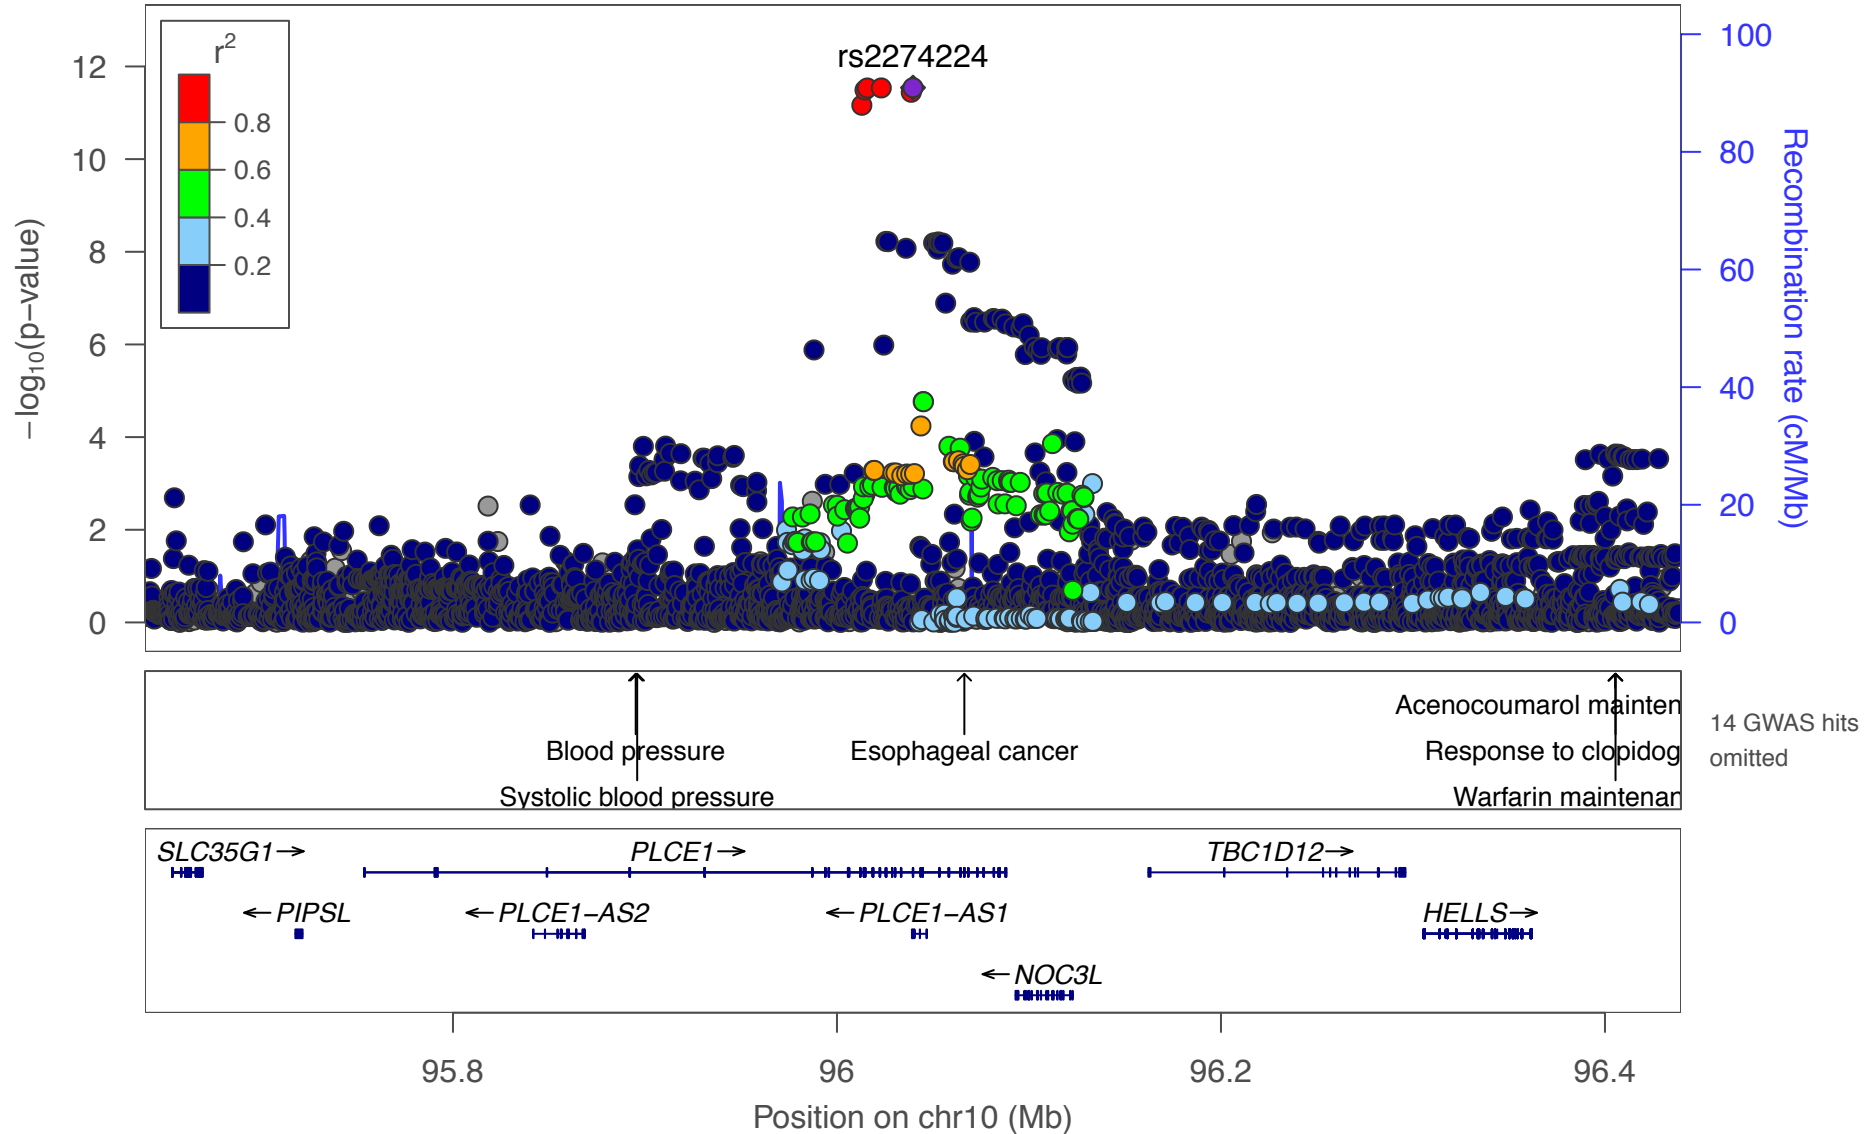

date: Thu Aug 17 18:57:13 2017

build: hg19

display range: chr10:95639597–96439597 [95639597–96439597]

hilite range: 0 – 0 [ 0 – 0 ]

reference SNP: chr10:96039597

number of SNPs plotted: 3187

min P.value: 2.87E–12 [chr10:96039597]

max P.value: 10E–1 [chr10:96178337]

omitted GWAS Hits: chr10:96.066341–Esophageal cancer, chr10:96.405502–Response to clopidogrel therapy

omitted GWAS Hits: NA, NA

GWAS Catalog SNPs in Region

| chr | pos (Mb) | trait                                                                        | snp         |
|-----|----------|------------------------------------------------------------------------------|-------------|
| 10  | 95.65996 | Cannabis dependence                                                          | rs146091982 |
| 10  | 95.89518 | Blood pressure                                                               | rs9663362   |
| 10  | 95.89594 | Systolic blood pressure                                                      | rs932764    |
| 10  | 95.89594 | Diastolic blood pressure                                                     | rs932764    |
| 10  | 95.89594 | Hypertension                                                                 | rs932764    |
| 10  | 95.90632 | Glucose homeostasis traits                                                   | rs1223629   |
| 10  | 96.01371 | Personality traits in bipolar disorder                                       | rs9419788   |
| 10  | 96.01462 | Migraine                                                                     | rs10786156  |
| 10  | 96.01903 | Migraine                                                                     | rs75473620  |
| 10  | 96.03598 | Sudden cardiac arrest                                                        | rs11187837  |
| 10  | 96.03631 | Vertical cup–disc ratio                                                      | rs7072574   |
| 10  | 96.05830 | Dengue shock syndrome                                                        | rs3765524   |
| 10  | 96.05830 | Esophageal cancer and gastric cancer                                         | rs3765524   |
| 10  | 96.05864 | Lifetime average cigarettes per day in chronic obstructive pulmonary disease | rs117607728 |
| 10  | 96.06634 | Esophageal cancer                                                            | rs2274223   |
| 10  | 96.06634 | Esophageal squamous cell carcinoma                                           | rs2274223   |
| 10  | 96.07037 | Esophageal cancer and gastric cancer                                         | rs3781264   |
| 10  | 96.40533 | Acenocoumarol maintenance dosage                                             | rs12772169  |
| 10  | 96.40550 | Response to clopidogrel therapy                                              | rs12777823  |
| 10  | 96.40550 | Warfarin maintenance dose                                                    | rs12777823  |

# NODEamps25\_0006

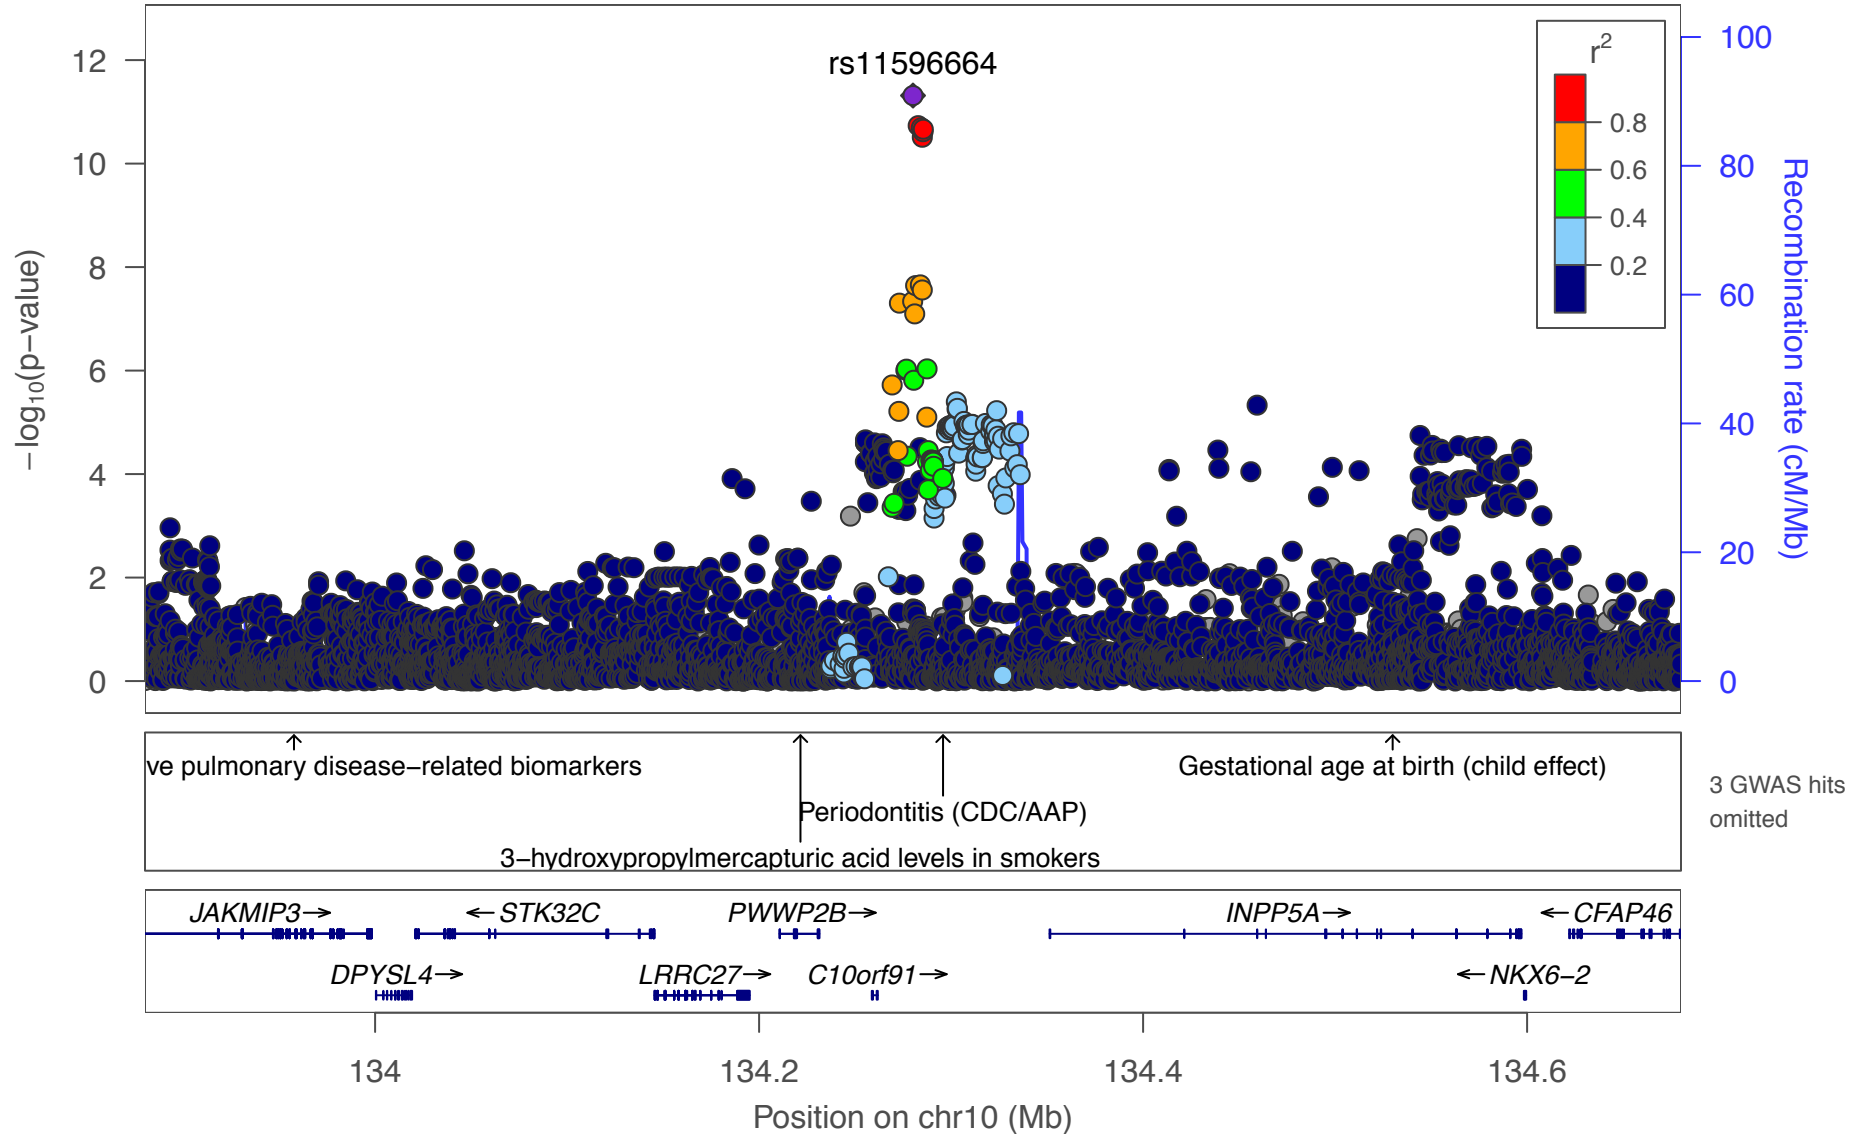

date: Thu Aug 17 19:17:52 2017

build: hg19

display range: chr10:133880157–134680157 [133880157–134680157]

hilite range: 0 – 0 [ 0 – 0 ]

reference SNP: chr10:134280157

number of SNPs plotted: 5001

min P.value: 4.84E–12 [chr10:134280157]

max P.value: 10E–1 [chr10:134191867]

omitted GWAS Hits: chr10:134.529972–Gestational age at birth (child effect), NA

## GWAS Catalog SNPs in Region

| <b>chr</b> | <b>pos (Mb)</b> | <b>trait</b>                                                          | <b>snp</b> |
|------------|-----------------|-----------------------------------------------------------------------|------------|
| 10         | 133.9578        | Chronic obstructive pulmonary disease–related biomarkers              | rs954820   |
| 10         | 134.2054        | Neuroticism                                                           | rs3923857  |
| 10         | 134.2215        | 3–hydroxypropylmercapturic acid levels in smokers                     | rs74383458 |
| 10         | 134.2215        | 3–hydroxy–1–methylpropylmercapturic acid levels in smokers            | rs74383458 |
| 10         | 134.2958        | Periodontitis (CDC/AAP)                                               | rs73389468 |
| 10         | 134.5300        | Gestational age at birth (child effect)                               | rs873946   |
| 10         | 134.5300        | Gestational age at birth in labor–initiated deliveries (child effect) | rs873946   |



# NODEamps25\_0013

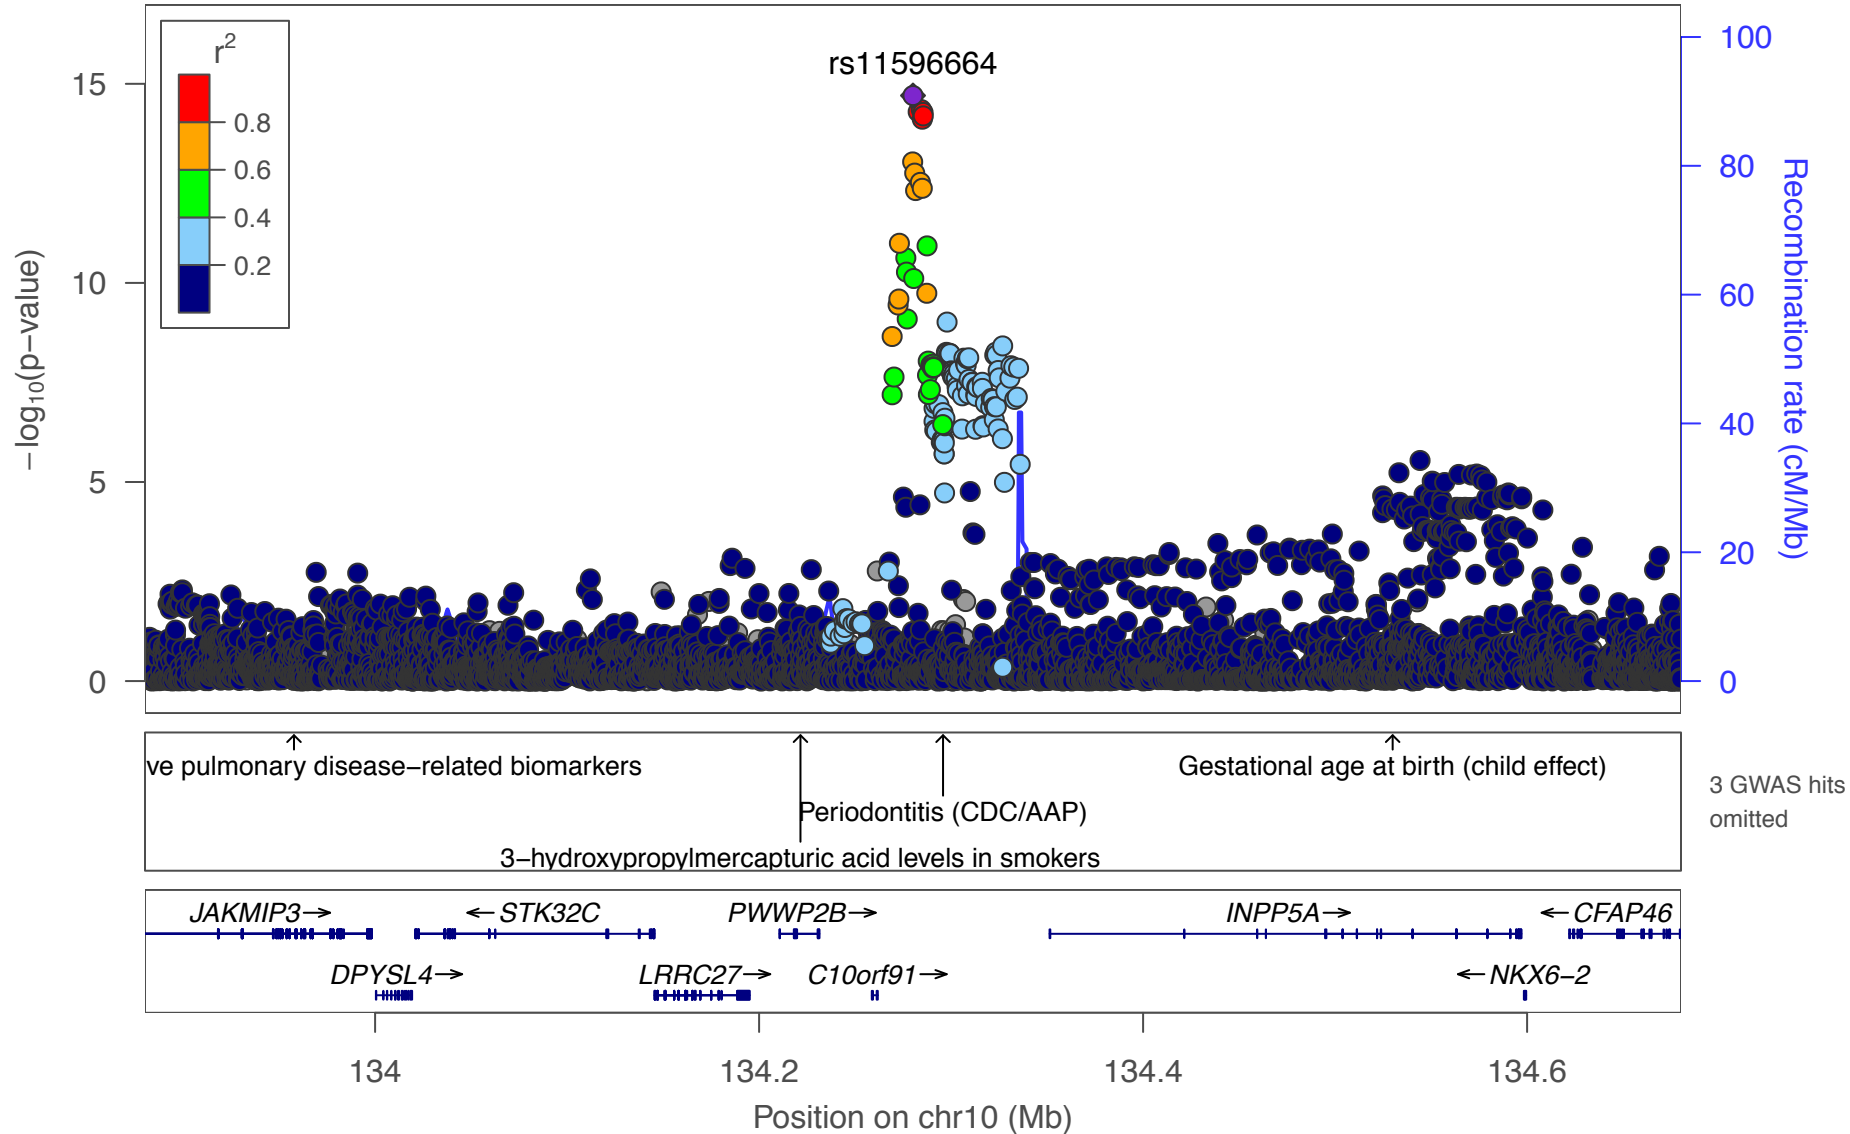

date: Thu Aug 17 19:17:52 2017

build: hg19

display range: chr10:133880157–134680157 [133880157–134680157]

hilite range: 0 – 0 [ 0 – 0 ]

reference SNP: chr10:134280157

number of SNPs plotted: 5001

min P.value: 1.97E–15 [chr10:134280157]

max P.value: 10E–1 [chr10:134201077]

omitted GWAS Hits: chr10:134.529972–Gestational age at birth (child effect), NA

## GWAS Catalog SNPs in Region

| <b>chr</b> | <b>pos (Mb)</b> | <b>trait</b>                                                          | <b>snp</b> |
|------------|-----------------|-----------------------------------------------------------------------|------------|
| 10         | 133.9578        | Chronic obstructive pulmonary disease–related biomarkers              | rs954820   |
| 10         | 134.2054        | Neuroticism                                                           | rs3923857  |
| 10         | 134.2215        | 3–hydroxypropylmercapturic acid levels in smokers                     | rs74383458 |
| 10         | 134.2215        | 3–hydroxy–1–methylpropylmercapturic acid levels in smokers            | rs74383458 |
| 10         | 134.2958        | Periodontitis (CDC/AAP)                                               | rs73389468 |
| 10         | 134.5300        | Gestational age at birth (child effect)                               | rs873946   |
| 10         | 134.5300        | Gestational age at birth in labor–initiated deliveries (child effect) | rs873946   |

# NODEamps25\_0016

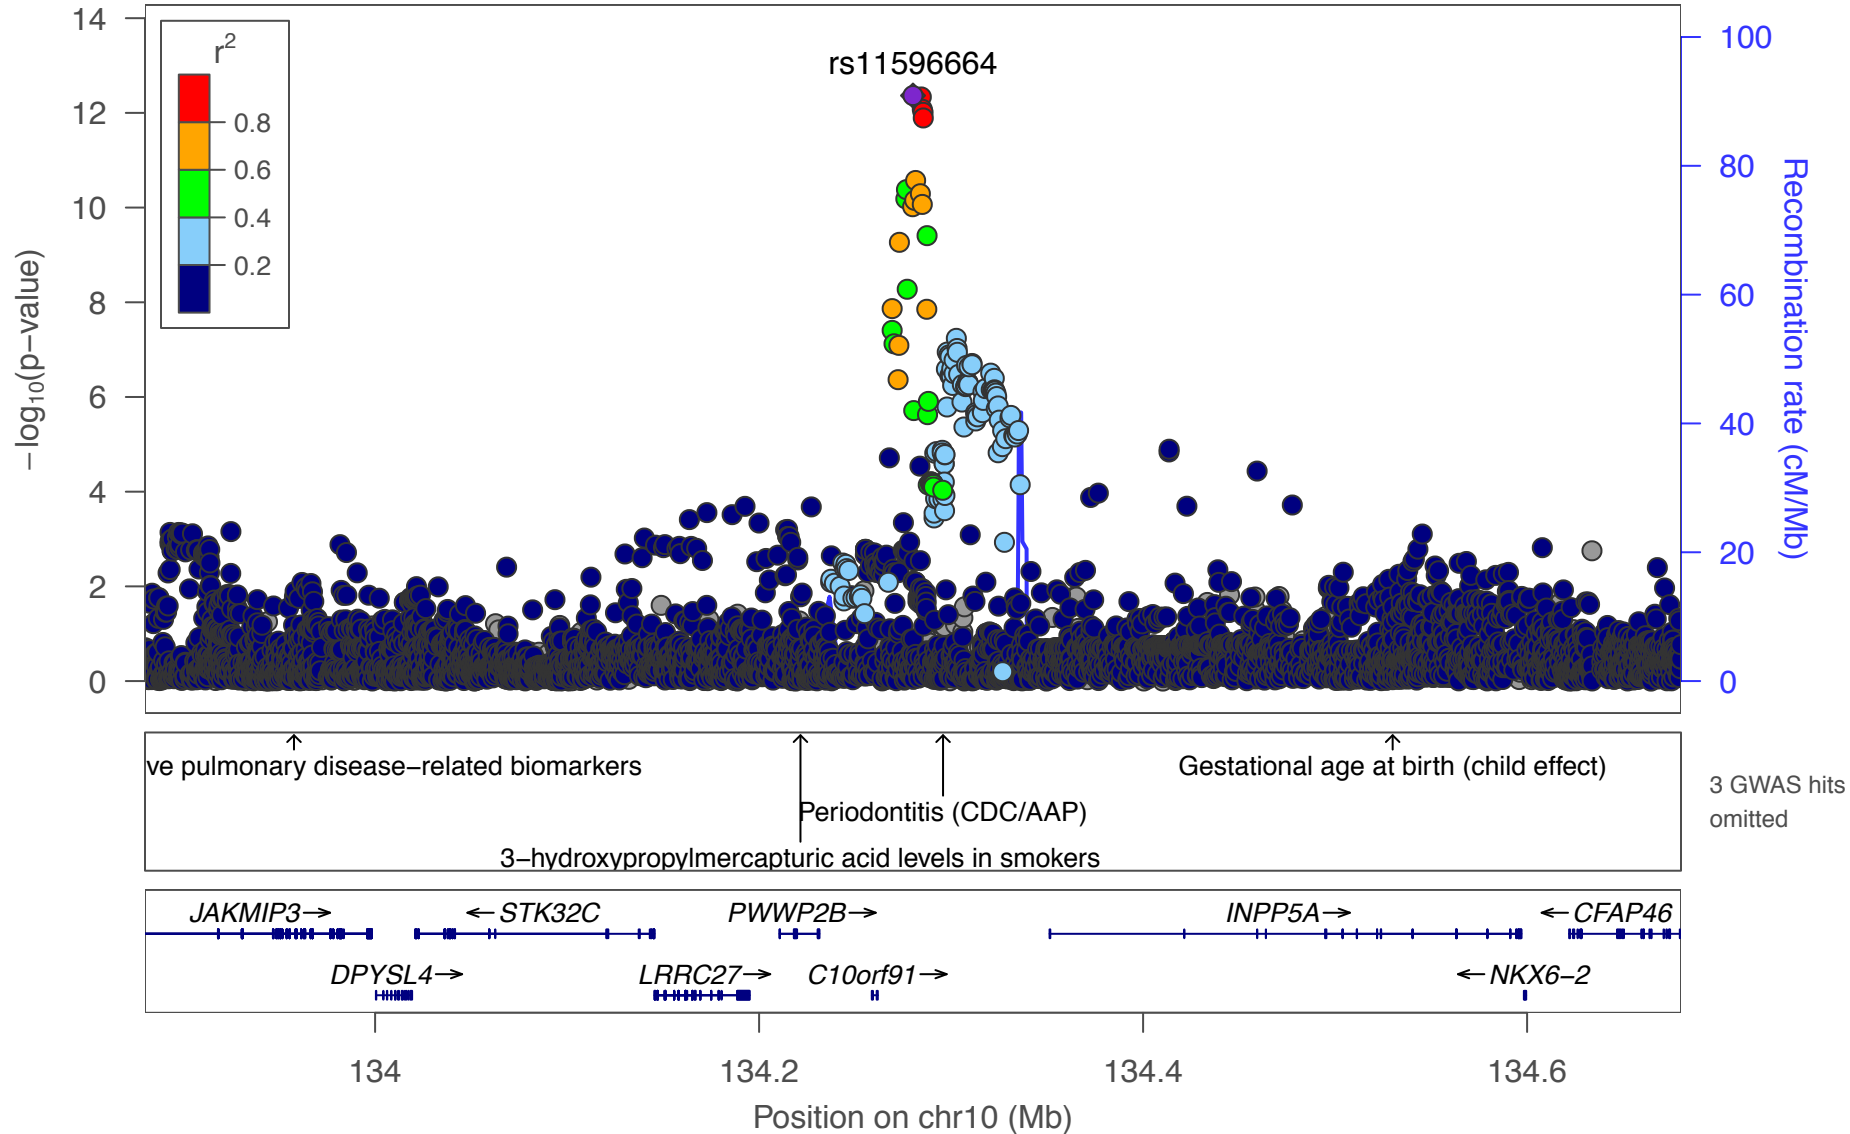

date: Thu Aug 17 19:15:57 2017

build: hg19

display range: chr10:133880157–134680157 [133880157–134680157]

hilite range: 0 – 0 [ 0 – 0 ]

reference SNP: chr10:134280157

number of SNPs plotted: 5001

min P.value: 4.31E–13 [chr10:134280157]

max P.value: 10E–1 [chr10:134664537]

omitted GWAS Hits: chr10:134.529972–Gestational age at birth (child effect), NA

## GWAS Catalog SNPs in Region

| <b>chr</b> | <b>pos (Mb)</b> | <b>trait</b>                                                          | <b>snp</b> |
|------------|-----------------|-----------------------------------------------------------------------|------------|
| 10         | 133.9578        | Chronic obstructive pulmonary disease–related biomarkers              | rs954820   |
| 10         | 134.2054        | Neuroticism                                                           | rs3923857  |
| 10         | 134.2215        | 3–hydroxypropylmercapturic acid levels in smokers                     | rs74383458 |
| 10         | 134.2215        | 3–hydroxy–1–methylpropylmercapturic acid levels in smokers            | rs74383458 |
| 10         | 134.2958        | Periodontitis (CDC/AAP)                                               | rs73389468 |
| 10         | 134.5300        | Gestational age at birth (child effect)                               | rs873946   |
| 10         | 134.5300        | Gestational age at birth in labor–initiated deliveries (child effect) | rs873946   |

# NODEamps25\_0021

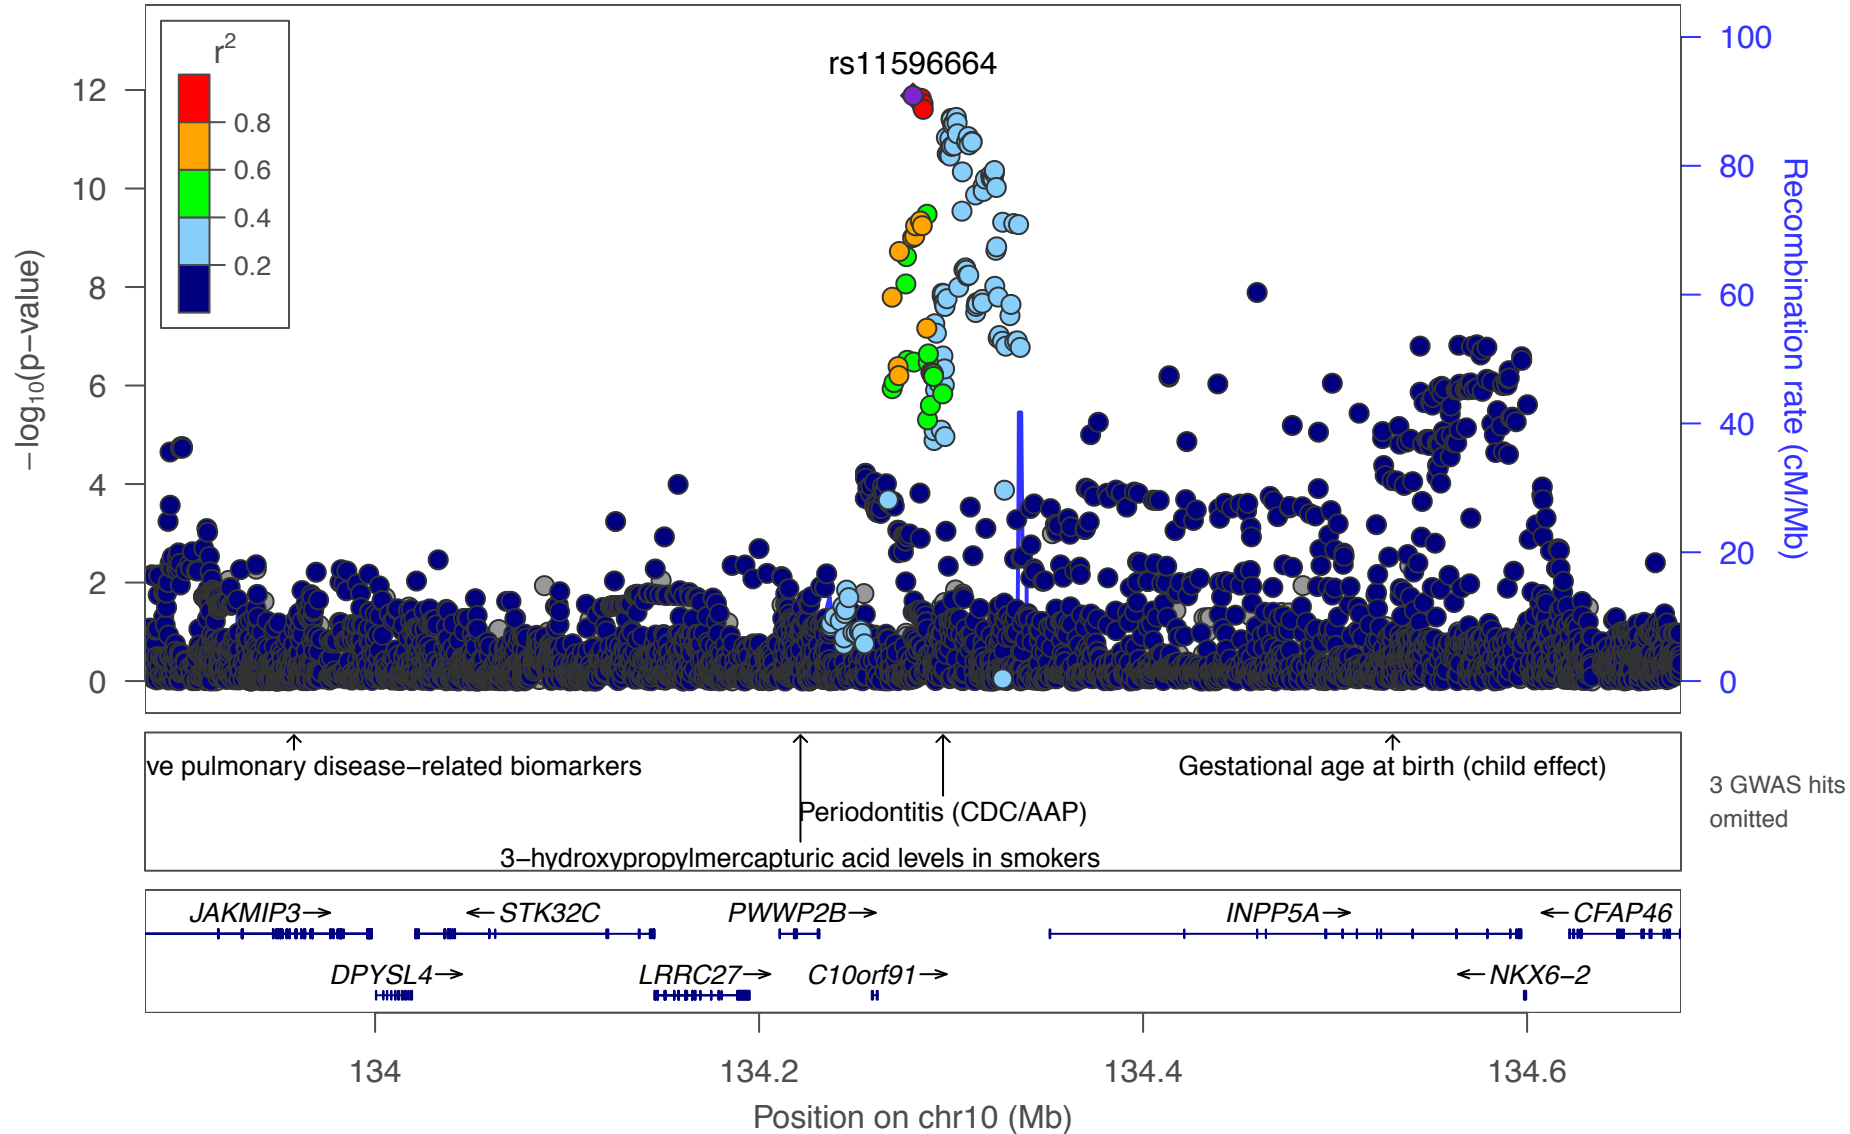

date: Thu Aug 17 19:15:57 2017

build: hg19

display range: chr10:133880157–134680157 [133880157–134680157]

hilite range: 0 – 0 [ 0 – 0 ]

reference SNP: chr10:134280157

number of SNPs plotted: 5001

min P.value: 1.3E–12 [chr10:134280157]

max P.value: 9.99E–1 [chr10:133935352]

omitted GWAS Hits: chr10:134.529972–Gestational age at birth (child effect), NA



## GWAS Catalog SNPs in Region

| <b>chr</b> | <b>pos (Mb)</b> | <b>trait</b>                                                          | <b>snp</b> |
|------------|-----------------|-----------------------------------------------------------------------|------------|
| 10         | 133.9578        | Chronic obstructive pulmonary disease–related biomarkers              | rs954820   |
| 10         | 134.2054        | Neuroticism                                                           | rs3923857  |
| 10         | 134.2215        | 3–hydroxypropylmercapturic acid levels in smokers                     | rs74383458 |
| 10         | 134.2215        | 3–hydroxy–1–methylpropylmercapturic acid levels in smokers            | rs74383458 |
| 10         | 134.2958        | Periodontitis (CDC/AAP)                                               | rs73389468 |
| 10         | 134.5300        | Gestational age at birth (child effect)                               | rs873946   |
| 10         | 134.5300        | Gestational age at birth in labor–initiated deliveries (child effect) | rs873946   |

# NODEamps100\_0035

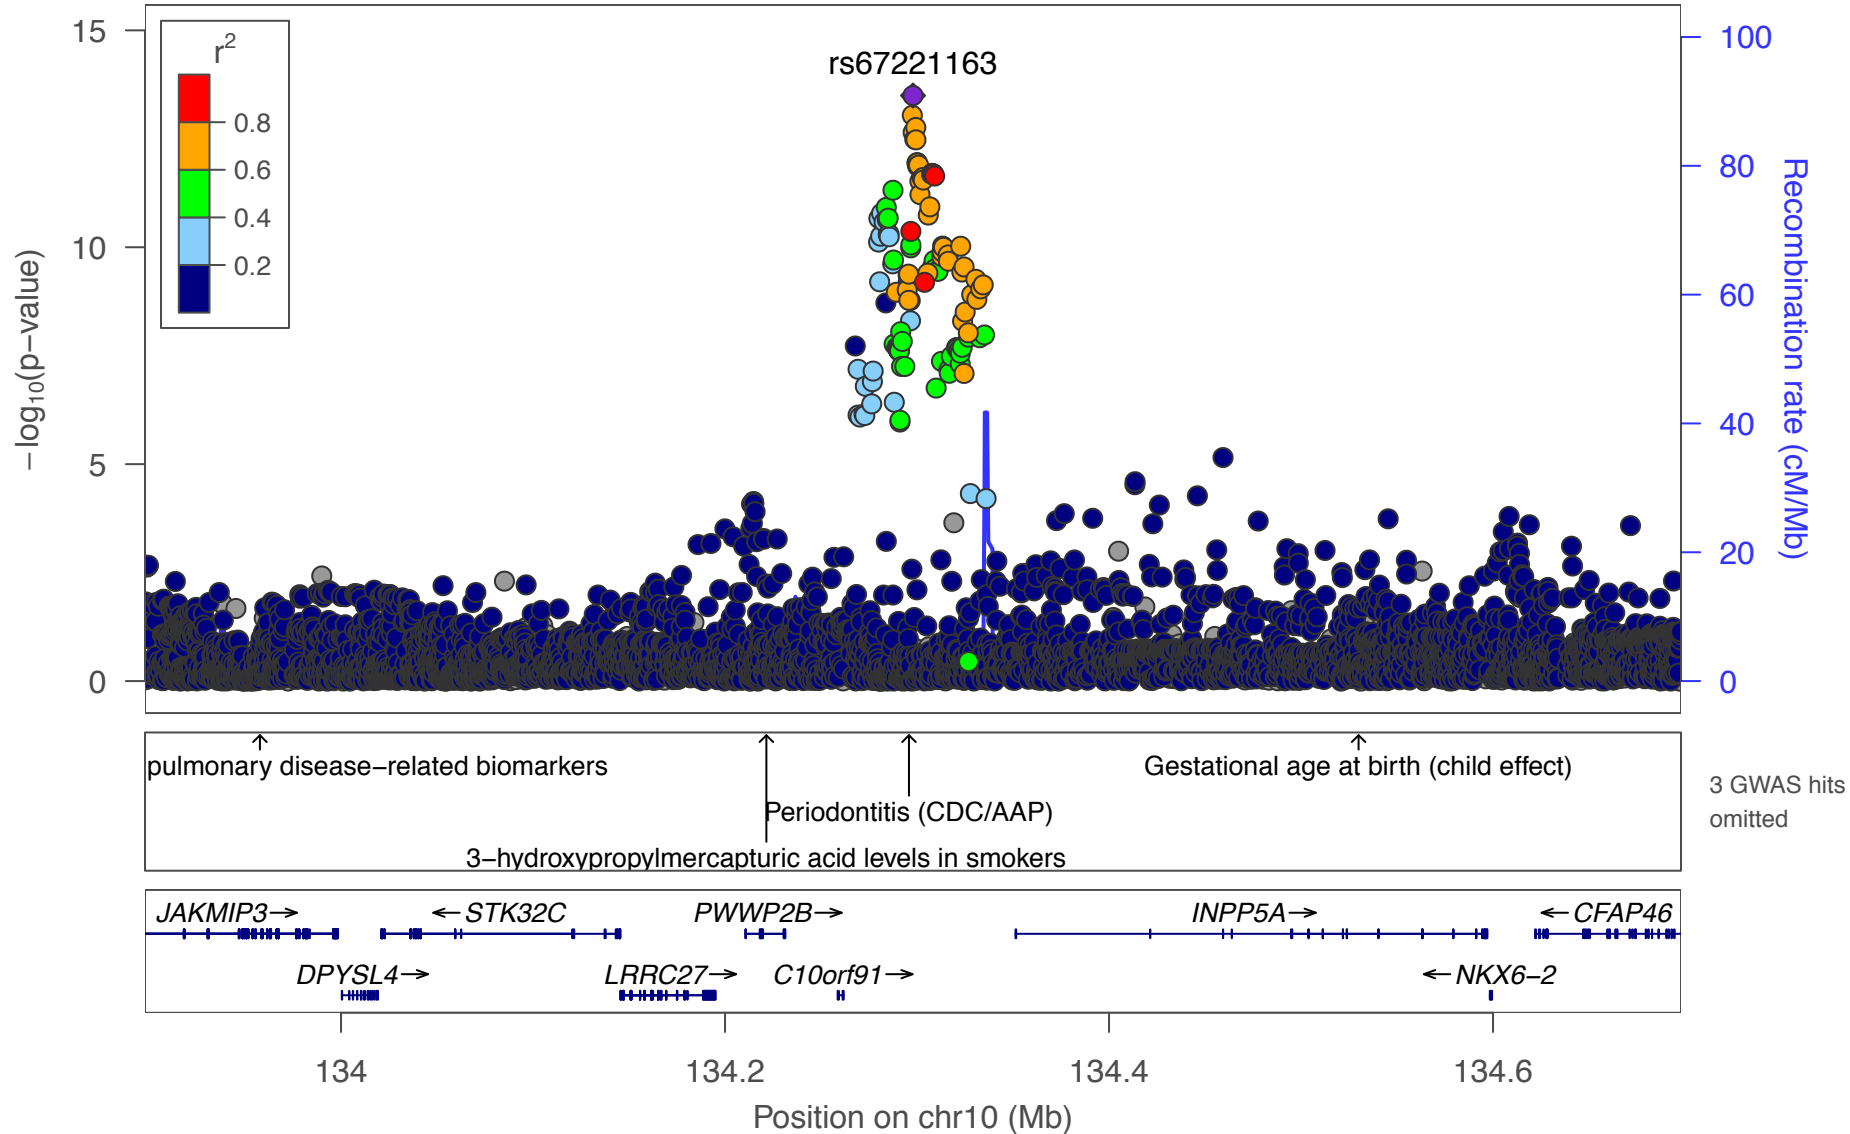

date: Thu Aug 17 18:58:29 2017

build: hg19

display range: chr10:133897909–134697909 [133897909–134697909]

hilite range: 0 – 0 [ 0 – 0 ]

reference SNP: chr10:134297909

number of SNPs plotted: 5069

min P.value: 3.18E–14 [chr10:134297909]

max P.value: 10E–1 [chr10:134697143]

omitted GWAS Hits: chr10:134.529972–Gestational age at birth (child effect), NA

## GWAS Catalog SNPs in Region

| <b>chr</b> | <b>pos (Mb)</b> | <b>trait</b>                                                          | <b>snp</b> |
|------------|-----------------|-----------------------------------------------------------------------|------------|
| 10         | 133.9578        | Chronic obstructive pulmonary disease–related biomarkers              | rs954820   |
| 10         | 134.2054        | Neuroticism                                                           | rs3923857  |
| 10         | 134.2215        | 3–hydroxypropylmercapturic acid levels in smokers                     | rs74383458 |
| 10         | 134.2215        | 3–hydroxy–1–methylpropylmercapturic acid levels in smokers            | rs74383458 |
| 10         | 134.2958        | Periodontitis (CDC/AAP)                                               | rs73389468 |
| 10         | 134.5300        | Gestational age at birth (child effect)                               | rs873946   |
| 10         | 134.5300        | Gestational age at birth in labor–initiated deliveries (child effect) | rs873946   |

# NODEamps100\_0027

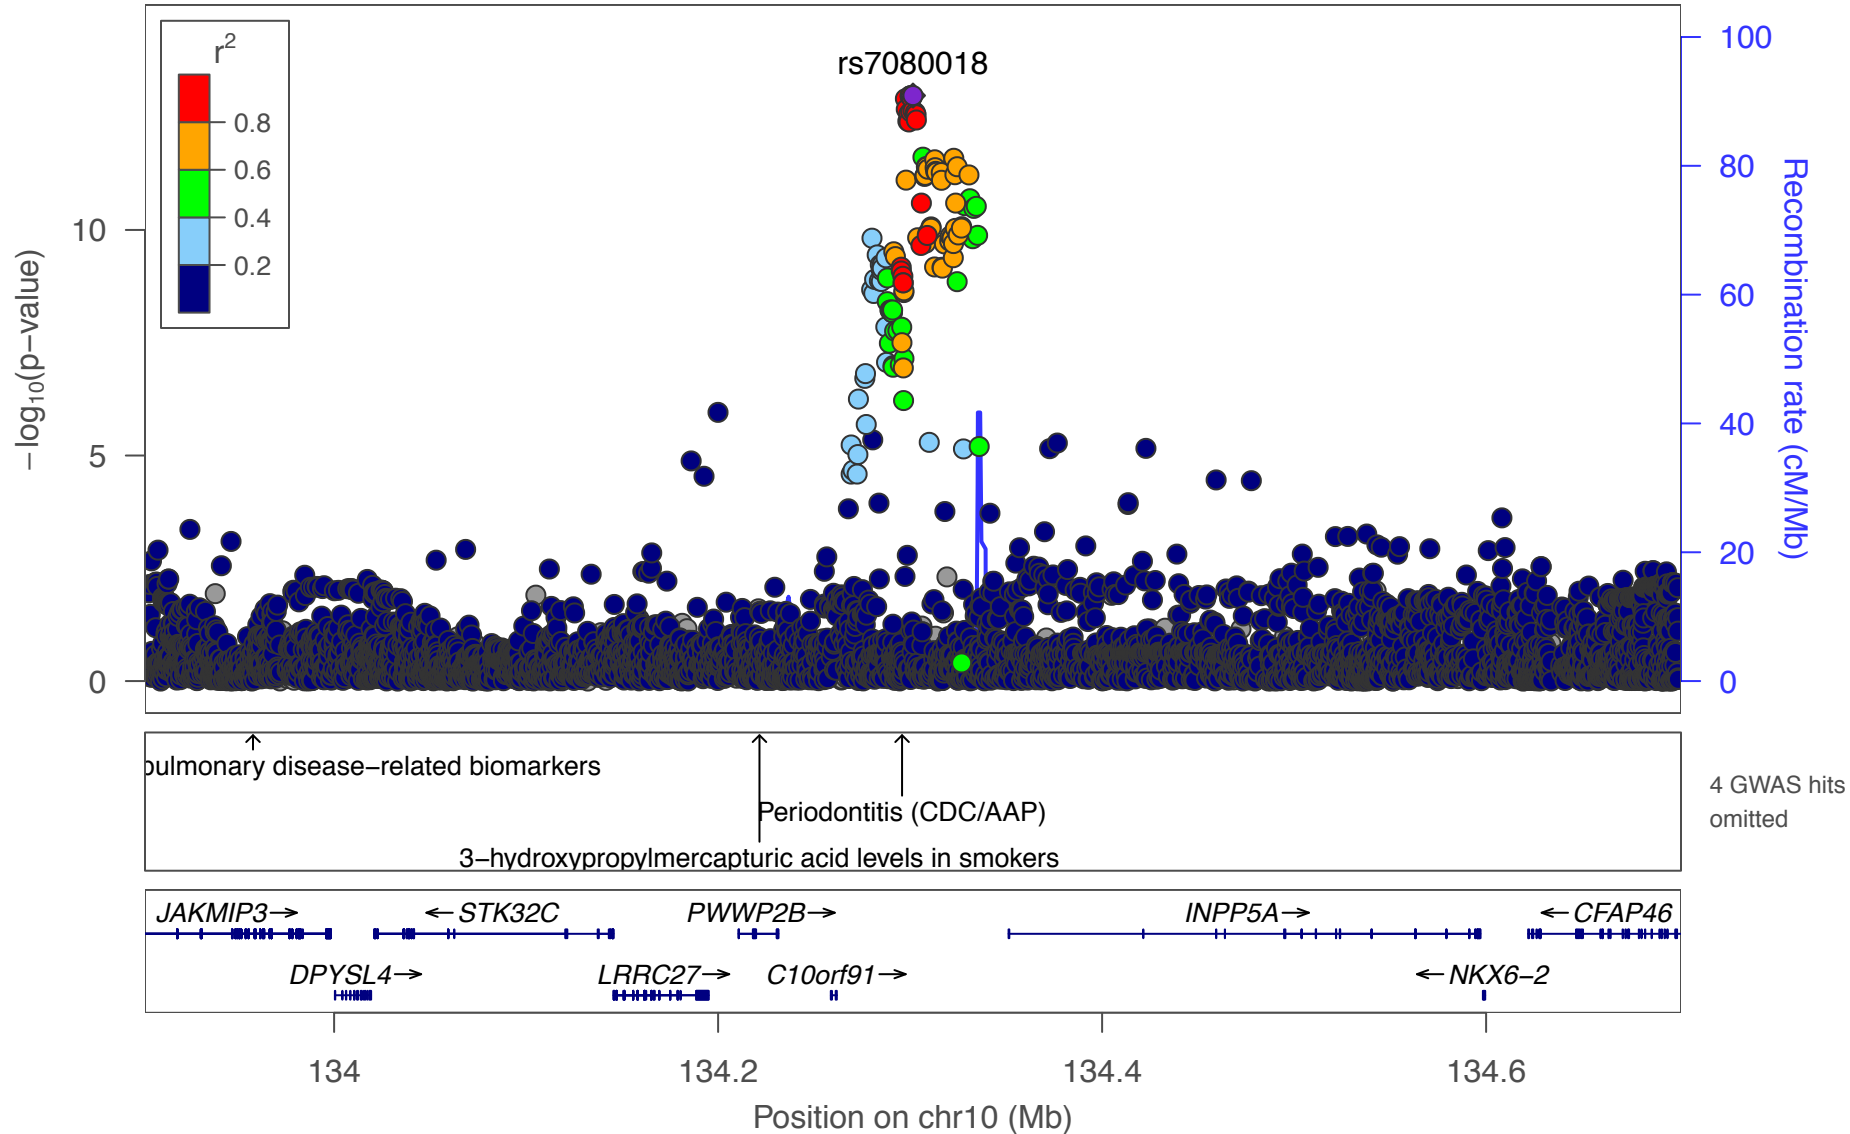

date: Thu Aug 17 18:59:23 2017

build: hg19

display range: chr10:133901505–134701505 [133901505–134701505]

hilite range: 0 – 0 [ 0 – 0 ]

reference SNP: chr10:134301505

number of SNPs plotted: 5069

min P.value: 1.05E–13 [chr10:134301505]

max P.value: 10E–1 [chr10:134033082]

omitted GWAS Hits: NA, NA

omitted GWAS Hits: NA

## GWAS Catalog SNPs in Region

| <b>chr</b> | <b>pos (Mb)</b> | <b>trait</b>                                                          | <b>snp</b> |
|------------|-----------------|-----------------------------------------------------------------------|------------|
| 10         | 133.9578        | Chronic obstructive pulmonary disease–related biomarkers              | rs954820   |
| 10         | 134.2054        | Neuroticism                                                           | rs3923857  |
| 10         | 134.2215        | 3–hydroxypropylmercapturic acid levels in smokers                     | rs74383458 |
| 10         | 134.2215        | 3–hydroxy–1–methylpropylmercapturic acid levels in smokers            | rs74383458 |
| 10         | 134.2958        | Periodontitis (CDC/AAP)                                               | rs73389468 |
| 10         | 134.5300        | Gestational age at birth (child effect)                               | rs873946   |
| 10         | 134.5300        | Gestational age at birth in labor–initiated deliveries (child effect) | rs873946   |

# SWI\_T2star\_right\_pallidum

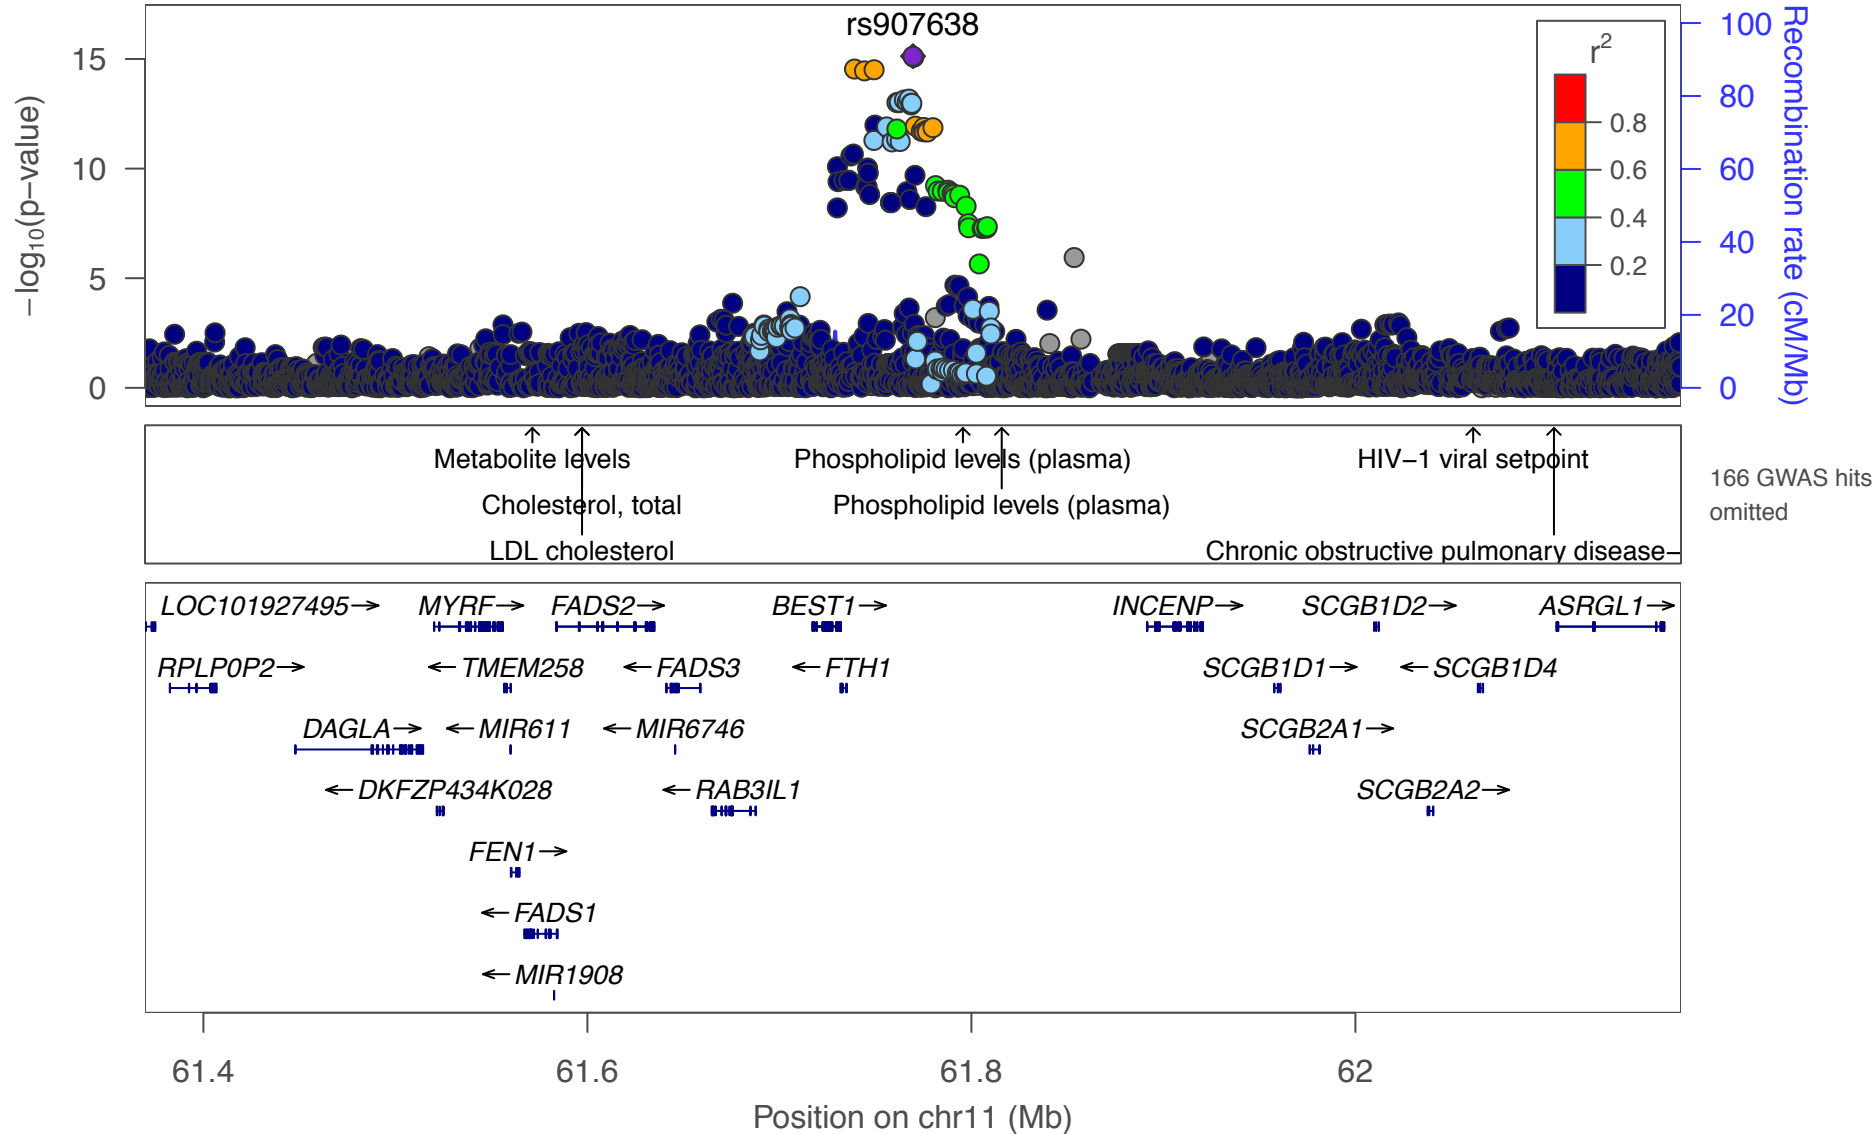



date: Thu Aug 17 18:50:05 2017

build: hg19

display range: chr11:61369588–62169588 [61369588–62169588]

hilite range: 0 – 0 [ 0 – 0 ]

reference SNP: chr11:61769588

number of SNPs plotted: 3658

min P.value: 7.46E–16 [chr11:61769588]

max P.value: 10E–1 [chr11:61861500]

omitted GWAS Hits: chr11:61.795586–Phospholipid levels (plasma), chr11:61.815803–Phospholipid levels (plasma)

omitted GWAS Hits: chr11:62.061349–HIV–1 viral setpoint, NA

omitted GWAS Hits: NA, NA

Make more plots at <http://csg.sph.umich.edu/locuszoom/>

omitted GWAS Hits: NA, NA

GWAS Catalog SNPs in Region

| chr | pos (Mb) | trait                                                                          | snp        |
|-----|----------|--------------------------------------------------------------------------------|------------|
| 11  | 61.41747 | Phospholipid levels (plasma)                                                   | rs1692120  |
| 11  | 61.44249 | Plasma omega-6 polyunsaturated fatty acid levels (gamma-linolenic acid)        | rs7925523  |
| 11  | 61.45860 | Plasma omega-6 polyunsaturated fatty acid levels (linoleic acid)               | rs11827215 |
| 11  | 61.48516 | 3-hydroxypropylmercapturic acid levels in smokers                              | rs10488693 |
| 11  | 61.49049 | Phospholipid levels (plasma)                                                   | rs198426   |
| 11  | 61.49433 | Immune reponse to smallpox (secreted IL-2)                                     | rs4963243  |
| 11  | 61.54350 | Plasma omega-6 polyunsaturated fatty acid levels (arachidonic acid)            | rs174528   |
| 11  | 61.54350 | Trans fatty acid levels                                                        | rs174528   |
| 11  | 61.54396 | HDL cholesterol                                                                | rs174529   |
| 11  | 61.54396 | Triglycerides                                                                  | rs174529   |
| 11  | 61.54724 | Trans fatty acid levels                                                        | rs108499   |
| 11  | 61.54856 | Plasma omega-3 polyunsaturated fatty acid levels (alpha-linolenic acid)        | rs509360   |
| 11  | 61.54856 | Trans fatty acid levels                                                        | rs509360   |
| 11  | 61.54946 | Plasma omega-6 polyunsaturated fatty acid levels (dihomo-gamma-linolenic acid) | rs174534   |
| 11  | 61.54946 | Trans fatty acid levels                                                        | rs174534   |
| 11  | 61.55136 | Phospholipid levels (plasma)                                                   | rs174535   |
| 11  | 61.55136 | Blood metabolite levels                                                        | rs174535   |
| 11  | 61.55136 | Red blood cell fatty acid levels                                               | rs174535   |
| 11  | 61.55136 | Trans fatty acid levels                                                        | rs174535   |
| 11  | 61.55193 | Phospholipid levels (plasma)                                                   | rs174536   |
| 11  | 61.55193 | Glycerophospholipid levels                                                     | rs174536   |

GWAS Catalog SNPs in Region

| chr | pos (Mb) | trait                                                                   | snp      |
|-----|----------|-------------------------------------------------------------------------|----------|
| 11  | 61.55193 | Plasma omega-3 polyunsaturated fatty acid levels (alphalinolenic acid)  | rs174536 |
| 11  | 61.55193 | Trans fatty acid levels                                                 | rs174536 |
| 11  | 61.55193 | Resting heart rate                                                      | rs174536 |
| 11  | 61.55268 | Crohn's disease                                                         | rs174537 |
| 11  | 61.55268 | Glycerophospholipid levels                                              | rs174537 |
| 11  | 61.55268 | Plasma omega-6 polyunsaturated fatty acid levels (gamma-linolenic acid) | rs174537 |
| 11  | 61.55268 | Colorectal cancer                                                       | rs174537 |
| 11  | 61.55268 | Trans fatty acid levels                                                 | rs174537 |
| 11  | 61.55780 | Phospholipid levels (plasma)                                            | rs102275 |
| 11  | 61.55780 | Metabolic syndrome                                                      | rs102275 |
| 11  | 61.55780 | Plasma omega-6 polyunsaturated fatty acid levels (arachidonic acid)     | rs102275 |
| 11  | 61.55780 | Metabolite levels                                                       | rs102275 |
| 11  | 61.55780 | Oleic acid (18:1n-9) plasma levels                                      | rs102275 |
| 11  | 61.55780 | Crohn's disease                                                         | rs102275 |
| 11  | 61.55780 | Glycerophospholipid levels                                              | rs102275 |
| 11  | 61.55780 | Trans fatty acid levels                                                 | rs102275 |
| 11  | 61.55780 | Palmitoleic acid (16:1n-7) plasma levels                                | rs102275 |
| 11  | 61.55780 | Stearic acid (18:0) plasma levels                                       | rs102275 |
| 11  | 61.56008 | Phospholipid levels (plasma)                                            | rs174538 |
| 11  | 61.56008 | Blood metabolite levels                                                 | rs174538 |
| 11  | 61.56008 | Trans fatty acid levels                                                 | rs174538 |

GWAS Catalog SNPs in Region

| chr | pos (Mb) | trait                                                                   | snp       |
|-----|----------|-------------------------------------------------------------------------|-----------|
| 11  | 61.56430 | Phospholipid levels (plasma)                                            | rs4246215 |
| 11  | 61.56430 | Platelet count                                                          | rs4246215 |
| 11  | 61.56430 | Inflammatory bowel disease                                              | rs4246215 |
| 11  | 61.56430 | Red blood cell fatty acid levels                                        | rs4246215 |
| 11  | 61.56430 | Trans fatty acid levels                                                 | rs4246215 |
| 11  | 61.56591 | Metabolite levels                                                       | rs174541  |
| 11  | 61.56591 | Red blood cell fatty acid levels                                        | rs174541  |
| 11  | 61.56591 | Trans fatty acid levels                                                 | rs174541  |
| 11  | 61.56931 | Delta-6 desaturase activity                                             | rs174545  |
| 11  | 61.56931 | Red blood cell fatty acid levels                                        | rs174545  |
| 11  | 61.56931 | Trans fatty acid levels                                                 | rs174545  |
| 11  | 61.56983 | LDL cholesterol                                                         | rs174546  |
| 11  | 61.56983 | HDL cholesterol                                                         | rs174546  |
| 11  | 61.56983 | Triglycerides                                                           | rs174546  |
| 11  | 61.56983 | Cholesterol, total                                                      | rs174546  |
| 11  | 61.56983 | Metabolic syndrome                                                      | rs174546  |
| 11  | 61.56983 | Glycerophospholipid levels                                              | rs174546  |
| 11  | 61.56983 | Plasma omega-6 polyunsaturated fatty acid levels (gamma-linolenic acid) | rs174546  |
| 11  | 61.56983 | Trans fatty acid levels                                                 | rs174546  |
| 11  | 61.56983 | C-reactive protein levels or triglyceride levels (pleiotropy)           | rs174546  |
| 11  | 61.56983 | C-reactive protein levels or HDL-cholesterol levels (pleiotropy)        | rs174546  |

GWAS Catalog SNPs in Region

| chr | pos (Mb) | trait                                                                          | snp      |
|-----|----------|--------------------------------------------------------------------------------|----------|
| 11  | 61.57078 | HDL cholesterol                                                                | rs174547 |
| 11  | 61.57078 | Triglycerides                                                                  | rs174547 |
| 11  | 61.57078 | Phospholipid levels (plasma)                                                   | rs174547 |
| 11  | 61.57078 | Resting heart rate                                                             | rs174547 |
| 11  | 61.57078 | Metabolic traits                                                               | rs174547 |
| 11  | 61.57078 | Lipid metabolism phenotypes                                                    | rs174547 |
| 11  | 61.57078 | Comprehensive strength and appendicular lean mass                              | rs174547 |
| 11  | 61.57078 | Glycerophospholipid levels                                                     | rs174547 |
| 11  | 61.57078 | Sphingolipid levels                                                            | rs174547 |
| 11  | 61.57078 | Metabolite levels (lipid measures)                                             | rs174547 |
| 11  | 61.57078 | Plasma omega-6 polyunsaturated fatty acid levels (linoleic acid)               | rs174547 |
| 11  | 61.57078 | Plasma omega-6 polyunsaturated fatty acid levels (gamma-linolenic acid)        | rs174547 |
| 11  | 61.57078 | Plasma omega-6 polyunsaturated fatty acid levels (arachidonic acid)            | rs174547 |
| 11  | 61.57078 | Height                                                                         | rs174547 |
| 11  | 61.57078 | Trans fatty acid levels                                                        | rs174547 |
| 11  | 61.57135 | Metabolite levels                                                              | rs174548 |
| 11  | 61.57135 | HDL cholesterol                                                                | rs174548 |
| 11  | 61.57135 | Triglycerides                                                                  | rs174548 |
| 11  | 61.57135 | Blood metabolite ratios                                                        | rs174548 |
| 11  | 61.57135 | Plasma omega-6 polyunsaturated fatty acid levels (dihomo-gamma-linolenic acid) | rs174548 |
| 11  | 61.57135 | Delta-6 desaturase activity                                                    | rs174548 |

GWAS Catalog SNPs in Region

| chr | pos (Mb) | trait                                                            | snp      |
|-----|----------|------------------------------------------------------------------|----------|
| 11  | 61.57135 | Blood metabolite levels                                          | rs174548 |
| 11  | 61.57135 | Hematology traits                                                | rs174548 |
| 11  | 61.57135 | Trans fatty acid levels                                          | rs174548 |
| 11  | 61.57138 | Laryngeal squamous cell carcinoma                                | rs174549 |
| 11  | 61.57138 | Comprehensive strength and appendicular lean mass                | rs174549 |
| 11  | 61.57138 | Heart rate                                                       | rs174549 |
| 11  | 61.57138 | Metabolite levels                                                | rs174549 |
| 11  | 61.57138 | Red blood cell fatty acid levels                                 | rs174549 |
| 11  | 61.57138 | Trans fatty acid levels                                          | rs174549 |
| 11  | 61.57148 | Phospholipid levels (plasma)                                     | rs174550 |
| 11  | 61.57148 | Fasting glucose-related traits                                   | rs174550 |
| 11  | 61.57148 | Fasting glucose-related traits (interaction with BMI)            | rs174550 |
| 11  | 61.57148 | Glycerophospholipid levels                                       | rs174550 |
| 11  | 61.57148 | Plasma omega-6 polyunsaturated fatty acid levels (linoleic acid) | rs174550 |
| 11  | 61.57148 | Plasma omega-6 polyunsaturated fatty acid levels (adrenic acid)  | rs174550 |
| 11  | 61.57148 | Blood metabolite levels                                          | rs174550 |
| 11  | 61.57148 | Red blood cell fatty acid levels                                 | rs174550 |
| 11  | 61.57148 | Trans fatty acid levels                                          | rs174550 |
| 11  | 61.57368 | LDL cholesterol                                                  | rs174551 |
| 11  | 61.57946 | Cholesterol, total                                               | rs174554 |
| 11  | 61.57976 | Glycerophospholipid levels                                       | rs174555 |

GWAS Catalog SNPs in Region

| chr | pos (Mb) | trait                                                                          | snp      |
|-----|----------|--------------------------------------------------------------------------------|----------|
| 11  | 61.57976 | Plasma omega-6 polyunsaturated fatty acid levels (dihomo-gamma-linolenic acid) | rs174555 |
| 11  | 61.57976 | Trans fatty acid levels                                                        | rs174555 |
| 11  | 61.58064 | Blood metabolite levels                                                        | rs174556 |
| 11  | 61.58064 | Trans fatty acid levels                                                        | rs174556 |
| 11  | 61.59556 | Glycerophospholipid levels                                                     | rs968567 |
| 11  | 61.59556 | Rheumatoid arthritis                                                           | rs968567 |
| 11  | 61.59556 | Blood metabolite levels                                                        | rs968567 |
| 11  | 61.59721 | Cholesterol, total                                                             | rs174570 |
| 11  | 61.59721 | LDL cholesterol                                                                | rs174570 |
| 11  | 61.59721 | HDL cholesterol                                                                | rs174570 |
| 11  | 61.59721 | Glycated hemoglobin levels                                                     | rs174570 |
| 11  | 61.59721 | Trans fatty acid levels                                                        | rs174570 |
| 11  | 61.59797 | Phospholipid levels (plasma)                                                   | rs1535   |
| 11  | 61.59797 | Metabolic syndrome                                                             | rs1535   |
| 11  | 61.59797 | Response to statin therapy                                                     | rs1535   |
| 11  | 61.59797 | Glycerophospholipid levels                                                     | rs1535   |
| 11  | 61.59797 | Inflammatory bowel disease                                                     | rs1535   |
| 11  | 61.59797 | Trans fatty acid levels                                                        | rs1535   |
| 11  | 61.60034 | Phospholipid levels (plasma)                                                   | rs174574 |
| 11  | 61.60034 | Trans fatty acid levels                                                        | rs174574 |
| 11  | 61.60034 | C-reactive protein levels or LDL-cholesterol levels (pleiotropy)               | rs174574 |

GWAS Catalog SNPs in Region

| chr | pos (Mb) | trait                                                               | snp       |
|-----|----------|---------------------------------------------------------------------|-----------|
| 11  | 61.60191 | Trans fatty acid levels                                             | rs2845573 |
| 11  | 61.60200 | Trans fatty acid levels                                             | rs174575  |
| 11  | 61.60324 | Plasma omega-6 polyunsaturated fatty acid levels (linoleic acid)    | rs2727270 |
| 11  | 61.60324 | Trans fatty acid levels                                             | rs2727270 |
| 11  | 61.60336 | Blood metabolite levels                                             | rs2727271 |
| 11  | 61.60336 | Trans fatty acid levels                                             | rs2727271 |
| 11  | 61.60351 | Glycerophospholipid levels                                          | rs174576  |
| 11  | 61.60351 | Trans fatty acid levels                                             | rs174576  |
| 11  | 61.60478 | Trans fatty acid levels                                             | rs2524299 |
| 11  | 61.60481 | Iron status biomarkers (transferrin levels)                         | rs174577  |
| 11  | 61.60481 | Plasma omega-6 polyunsaturated fatty acid levels (arachidonic acid) | rs174577  |
| 11  | 61.60481 | P wave duration                                                     | rs174577  |
| 11  | 61.60481 | Trans fatty acid levels                                             | rs174577  |
| 11  | 61.60481 | QRS duration                                                        | rs174577  |
| 11  | 61.60522 | Trans fatty acid levels                                             | rs2072114 |
| 11  | 61.60550 | Glycerophospholipid levels                                          | rs174578  |
| 11  | 61.60550 | Plasma omega-6 polyunsaturated fatty acid levels (linoleic acid)    | rs174578  |
| 11  | 61.60550 | Blood metabolite levels                                             | rs174578  |
| 11  | 61.60550 | Trans fatty acid levels                                             | rs174578  |
| 11  | 61.60975 | Response to statin therapy                                          | rs174583  |
| 11  | 61.60975 | QT interval                                                         | rs174583  |



GWAS Catalog SNPs in Region

| chr | pos (Mb) | trait                                      | snp        |
|-----|----------|--------------------------------------------|------------|
| 11  | 61.60975 | Trans fatty acid levels                    | rs174583   |
| 11  | 61.61601 | Trans fatty acid levels                    | rs2851682  |
| 11  | 61.61601 | Gestational age at birth (child effect)    | rs2851682  |
| 11  | 61.62314 | Liver enzyme levels (alkaline phosphatase) | rs174601   |
| 11  | 61.62314 | Blood metabolite levels                    | rs174601   |
| 11  | 61.62314 | Red blood cell fatty acid levels           | rs174601   |
| 11  | 61.62314 | Trans fatty acid levels                    | rs174601   |
| 11  | 61.62379 | Trans fatty acid levels                    | rs2526678  |
| 11  | 61.63949 | Trans fatty acid levels                    | rs422249   |
| 11  | 61.63957 | Phospholipid levels (plasma)               | rs174448   |
| 11  | 61.63957 | Trans fatty acid levels                    | rs174448   |
| 11  | 61.64038 | Trans fatty acid levels                    | rs174449   |
| 11  | 61.65530 | Sphingolipid levels                        | rs1000778  |
| 11  | 61.66369 | Phospholipid levels (plasma)               | rs174468   |
| 11  | 61.67875 | Sphingolipid levels                        | rs174479   |
| 11  | 61.71148 | Phospholipid levels (plasma)               | rs2521572  |
| 11  | 61.71213 | Estradiol levels                           | rs2727261  |
| 11  | 61.72264 | Phospholipid levels (plasma)               | rs1109748  |
| 11  | 61.74629 | Phospholipid levels (plasma)               | rs10792320 |
| 11  | 61.79559 | Phospholipid levels (plasma)               | rs11230874 |
| 11  | 61.81580 | Phospholipid levels (plasma)               | rs4963452  |

## GWAS Catalog SNPs in Region

| <b>chr</b> | <b>pos (Mb)</b> | <b>trait</b>                                                            | <b>snp</b>  |
|------------|-----------------|-------------------------------------------------------------------------|-------------|
| 11         | 61.96393        | 3-hydroxypropylmercapturic acid levels in smokers                       | rs189478926 |
| 11         | 62.00141        | Plasma omega-6 polyunsaturated fatty acid levels (gamma-linolenic acid) | rs12806663  |
| 11         | 62.06135        | HIV-1 viral setpoint                                                    | rs11231017  |
| 11         | 62.10342        | Chronic obstructive pulmonary disease-related biomarkers                | rs2463822   |
| 11         | 62.14169        | 3-hydroxypropylmercapturic acid levels in smokers                       | rs184485201 |

# SWI\_T2star\_left\_pallidum

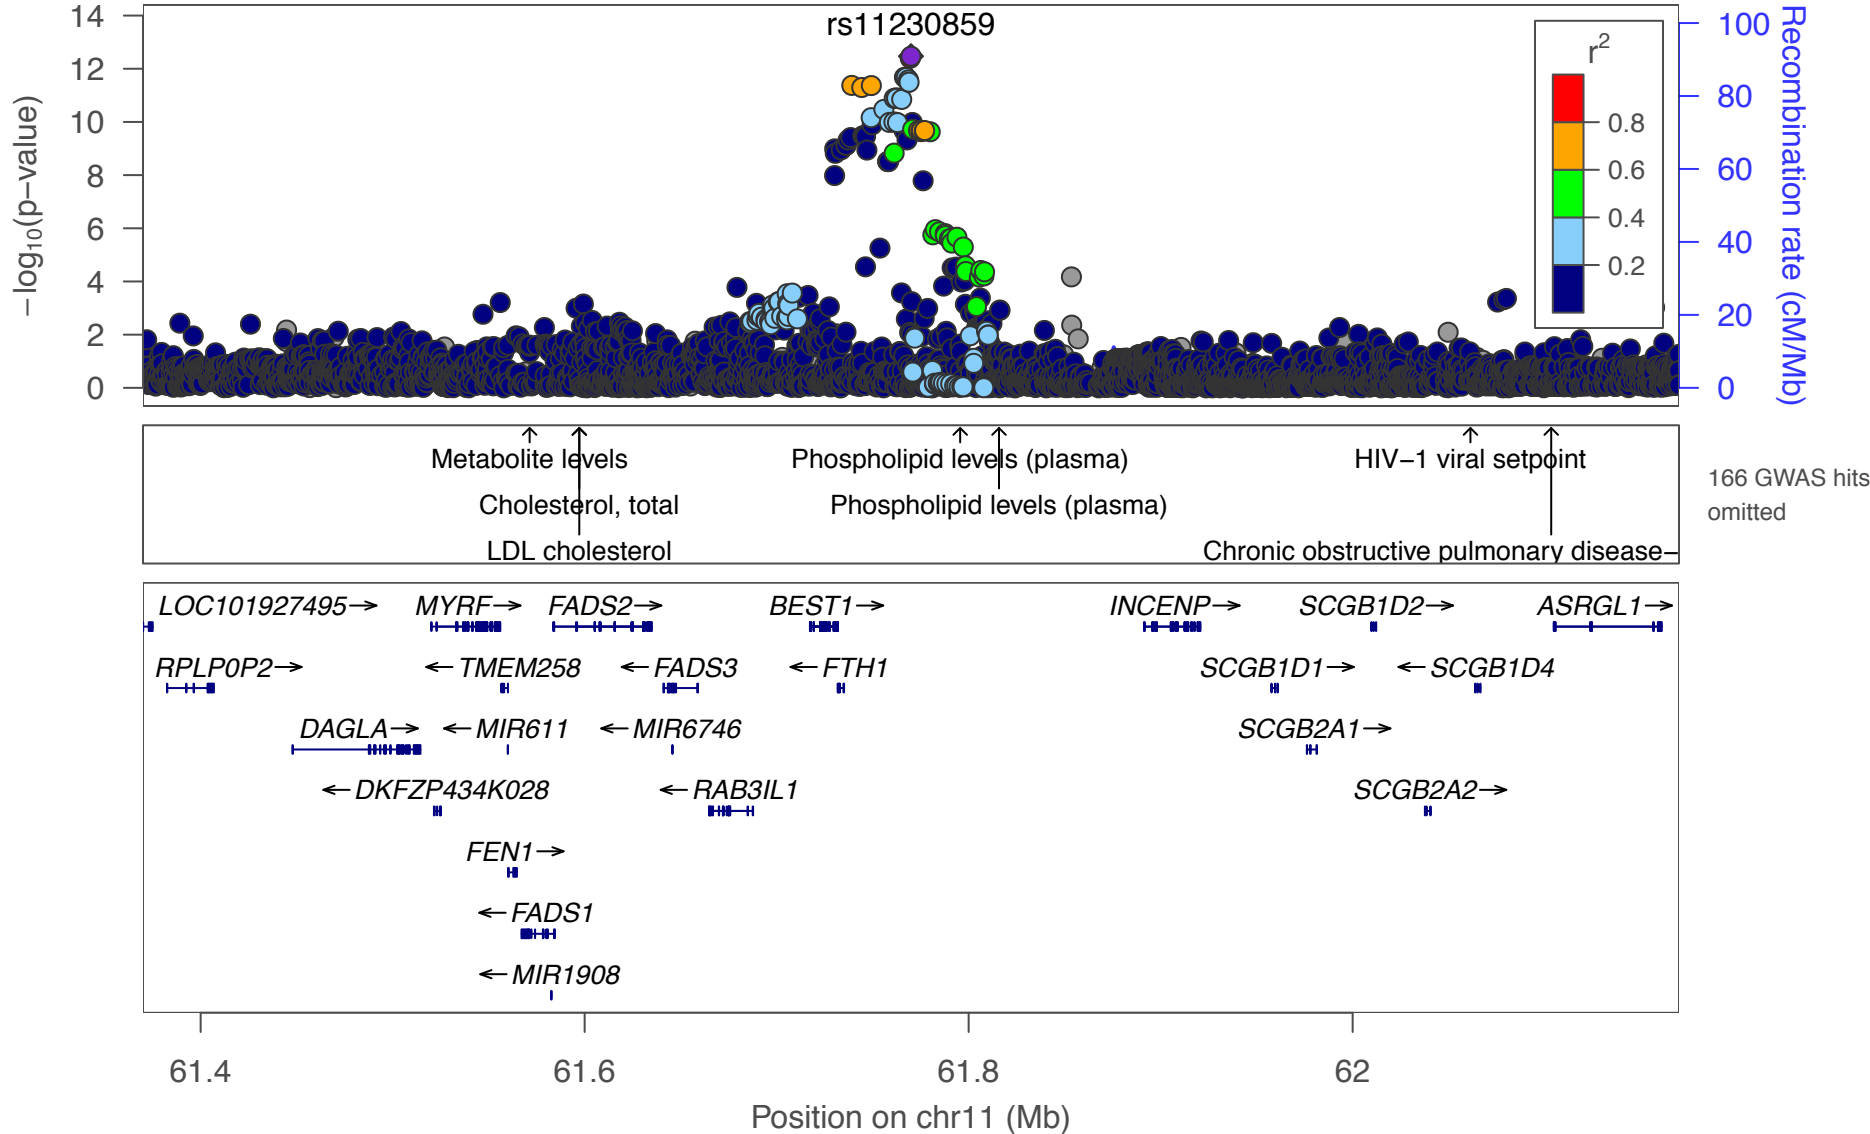

date: Thu Aug 17 19:04:48 2017

build: hg19

display range: chr11:61369972–62169972 [61369972–62169972]

hilite range: 0 – 0 [ 0 – 0 ]

reference SNP: chr11:61769972

number of SNPs plotted: 3667

min P.value: 3.37E–13 [chr11:61769972]

max P.value: 10E–1 [chr11:61923657]

omitted GWAS Hits: chr11:61.795586–Phospholipid levels (plasma), chr11:61.815803–Phospholipid levels (plasma)

omitted GWAS Hits: chr11:62.061349–HIV–1 viral setpoint, NA

omitted GWAS Hits: NA, NA

Make more plots at <http://csg.sph.umich.edu/locuszoom/>

omitted GWAS Hits: NA, NA

GWAS Catalog SNPs in Region

| chr | pos (Mb) | trait                                                                          | snp        |
|-----|----------|--------------------------------------------------------------------------------|------------|
| 11  | 61.41747 | Phospholipid levels (plasma)                                                   | rs1692120  |
| 11  | 61.44249 | Plasma omega-6 polyunsaturated fatty acid levels (gamma-linolenic acid)        | rs7925523  |
| 11  | 61.45860 | Plasma omega-6 polyunsaturated fatty acid levels (linoleic acid)               | rs11827215 |
| 11  | 61.48516 | 3-hydroxypropylmercapturic acid levels in smokers                              | rs10488693 |
| 11  | 61.49049 | Phospholipid levels (plasma)                                                   | rs198426   |
| 11  | 61.49433 | Immune reponse to smallpox (secreted IL-2)                                     | rs4963243  |
| 11  | 61.54350 | Plasma omega-6 polyunsaturated fatty acid levels (arachidonic acid)            | rs174528   |
| 11  | 61.54350 | Trans fatty acid levels                                                        | rs174528   |
| 11  | 61.54396 | HDL cholesterol                                                                | rs174529   |
| 11  | 61.54396 | Triglycerides                                                                  | rs174529   |
| 11  | 61.54724 | Trans fatty acid levels                                                        | rs108499   |
| 11  | 61.54856 | Plasma omega-3 polyunsaturated fatty acid levels (alpha-linolenic acid)        | rs509360   |
| 11  | 61.54856 | Trans fatty acid levels                                                        | rs509360   |
| 11  | 61.54946 | Plasma omega-6 polyunsaturated fatty acid levels (dihomo-gamma-linolenic acid) | rs174534   |
| 11  | 61.54946 | Trans fatty acid levels                                                        | rs174534   |
| 11  | 61.55136 | Phospholipid levels (plasma)                                                   | rs174535   |
| 11  | 61.55136 | Blood metabolite levels                                                        | rs174535   |
| 11  | 61.55136 | Red blood cell fatty acid levels                                               | rs174535   |
| 11  | 61.55136 | Trans fatty acid levels                                                        | rs174535   |
| 11  | 61.55193 | Phospholipid levels (plasma)                                                   | rs174536   |
| 11  | 61.55193 | Glycerophospholipid levels                                                     | rs174536   |

GWAS Catalog SNPs in Region

| chr | pos (Mb) | trait                                                                   | snp      |
|-----|----------|-------------------------------------------------------------------------|----------|
| 11  | 61.55193 | Plasma omega-3 polyunsaturated fatty acid levels (alphalinolenic acid)  | rs174536 |
| 11  | 61.55193 | Trans fatty acid levels                                                 | rs174536 |
| 11  | 61.55193 | Resting heart rate                                                      | rs174536 |
| 11  | 61.55268 | Crohn's disease                                                         | rs174537 |
| 11  | 61.55268 | Glycerophospholipid levels                                              | rs174537 |
| 11  | 61.55268 | Plasma omega-6 polyunsaturated fatty acid levels (gamma-linolenic acid) | rs174537 |
| 11  | 61.55268 | Colorectal cancer                                                       | rs174537 |
| 11  | 61.55268 | Trans fatty acid levels                                                 | rs174537 |
| 11  | 61.55780 | Phospholipid levels (plasma)                                            | rs102275 |
| 11  | 61.55780 | Metabolic syndrome                                                      | rs102275 |
| 11  | 61.55780 | Plasma omega-6 polyunsaturated fatty acid levels (arachidonic acid)     | rs102275 |
| 11  | 61.55780 | Metabolite levels                                                       | rs102275 |
| 11  | 61.55780 | Oleic acid (18:1n-9) plasma levels                                      | rs102275 |
| 11  | 61.55780 | Crohn's disease                                                         | rs102275 |
| 11  | 61.55780 | Glycerophospholipid levels                                              | rs102275 |
| 11  | 61.55780 | Trans fatty acid levels                                                 | rs102275 |
| 11  | 61.55780 | Palmitoleic acid (16:1n-7) plasma levels                                | rs102275 |
| 11  | 61.55780 | Stearic acid (18:0) plasma levels                                       | rs102275 |
| 11  | 61.56008 | Phospholipid levels (plasma)                                            | rs174538 |
| 11  | 61.56008 | Blood metabolite levels                                                 | rs174538 |
| 11  | 61.56008 | Trans fatty acid levels                                                 | rs174538 |

GWAS Catalog SNPs in Region

| chr | pos (Mb) | trait                                                                   | snp       |
|-----|----------|-------------------------------------------------------------------------|-----------|
| 11  | 61.56430 | Phospholipid levels (plasma)                                            | rs4246215 |
| 11  | 61.56430 | Platelet count                                                          | rs4246215 |
| 11  | 61.56430 | Inflammatory bowel disease                                              | rs4246215 |
| 11  | 61.56430 | Red blood cell fatty acid levels                                        | rs4246215 |
| 11  | 61.56430 | Trans fatty acid levels                                                 | rs4246215 |
| 11  | 61.56591 | Metabolite levels                                                       | rs174541  |
| 11  | 61.56591 | Red blood cell fatty acid levels                                        | rs174541  |
| 11  | 61.56591 | Trans fatty acid levels                                                 | rs174541  |
| 11  | 61.56931 | Delta-6 desaturase activity                                             | rs174545  |
| 11  | 61.56931 | Red blood cell fatty acid levels                                        | rs174545  |
| 11  | 61.56931 | Trans fatty acid levels                                                 | rs174545  |
| 11  | 61.56983 | LDL cholesterol                                                         | rs174546  |
| 11  | 61.56983 | HDL cholesterol                                                         | rs174546  |
| 11  | 61.56983 | Triglycerides                                                           | rs174546  |
| 11  | 61.56983 | Cholesterol, total                                                      | rs174546  |
| 11  | 61.56983 | Metabolic syndrome                                                      | rs174546  |
| 11  | 61.56983 | Glycerophospholipid levels                                              | rs174546  |
| 11  | 61.56983 | Plasma omega-6 polyunsaturated fatty acid levels (gamma-linolenic acid) | rs174546  |
| 11  | 61.56983 | Trans fatty acid levels                                                 | rs174546  |
| 11  | 61.56983 | C-reactive protein levels or triglyceride levels (pleiotropy)           | rs174546  |
| 11  | 61.56983 | C-reactive protein levels or HDL-cholesterol levels (pleiotropy)        | rs174546  |

GWAS Catalog SNPs in Region

| chr | pos (Mb) | trait                                                                          | snp      |
|-----|----------|--------------------------------------------------------------------------------|----------|
| 11  | 61.57078 | HDL cholesterol                                                                | rs174547 |
| 11  | 61.57078 | Triglycerides                                                                  | rs174547 |
| 11  | 61.57078 | Phospholipid levels (plasma)                                                   | rs174547 |
| 11  | 61.57078 | Resting heart rate                                                             | rs174547 |
| 11  | 61.57078 | Metabolic traits                                                               | rs174547 |
| 11  | 61.57078 | Lipid metabolism phenotypes                                                    | rs174547 |
| 11  | 61.57078 | Comprehensive strength and appendicular lean mass                              | rs174547 |
| 11  | 61.57078 | Glycerophospholipid levels                                                     | rs174547 |
| 11  | 61.57078 | Sphingolipid levels                                                            | rs174547 |
| 11  | 61.57078 | Metabolite levels (lipid measures)                                             | rs174547 |
| 11  | 61.57078 | Plasma omega-6 polyunsaturated fatty acid levels (linoleic acid)               | rs174547 |
| 11  | 61.57078 | Plasma omega-6 polyunsaturated fatty acid levels (gamma-linolenic acid)        | rs174547 |
| 11  | 61.57078 | Plasma omega-6 polyunsaturated fatty acid levels (arachidonic acid)            | rs174547 |
| 11  | 61.57078 | Height                                                                         | rs174547 |
| 11  | 61.57078 | Trans fatty acid levels                                                        | rs174547 |
| 11  | 61.57135 | Metabolite levels                                                              | rs174548 |
| 11  | 61.57135 | HDL cholesterol                                                                | rs174548 |
| 11  | 61.57135 | Triglycerides                                                                  | rs174548 |
| 11  | 61.57135 | Blood metabolite ratios                                                        | rs174548 |
| 11  | 61.57135 | Plasma omega-6 polyunsaturated fatty acid levels (dihomo-gamma-linolenic acid) | rs174548 |
| 11  | 61.57135 | Delta-6 desaturase activity                                                    | rs174548 |



GWAS Catalog SNPs in Region

| chr | pos (Mb) | trait                                                            | snp      |
|-----|----------|------------------------------------------------------------------|----------|
| 11  | 61.57135 | Blood metabolite levels                                          | rs174548 |
| 11  | 61.57135 | Hematology traits                                                | rs174548 |
| 11  | 61.57135 | Trans fatty acid levels                                          | rs174548 |
| 11  | 61.57138 | Laryngeal squamous cell carcinoma                                | rs174549 |
| 11  | 61.57138 | Comprehensive strength and appendicular lean mass                | rs174549 |
| 11  | 61.57138 | Heart rate                                                       | rs174549 |
| 11  | 61.57138 | Metabolite levels                                                | rs174549 |
| 11  | 61.57138 | Red blood cell fatty acid levels                                 | rs174549 |
| 11  | 61.57138 | Trans fatty acid levels                                          | rs174549 |
| 11  | 61.57148 | Phospholipid levels (plasma)                                     | rs174550 |
| 11  | 61.57148 | Fasting glucose-related traits                                   | rs174550 |
| 11  | 61.57148 | Fasting glucose-related traits (interaction with BMI)            | rs174550 |
| 11  | 61.57148 | Glycerophospholipid levels                                       | rs174550 |
| 11  | 61.57148 | Plasma omega-6 polyunsaturated fatty acid levels (linoleic acid) | rs174550 |
| 11  | 61.57148 | Plasma omega-6 polyunsaturated fatty acid levels (adrenic acid)  | rs174550 |
| 11  | 61.57148 | Blood metabolite levels                                          | rs174550 |
| 11  | 61.57148 | Red blood cell fatty acid levels                                 | rs174550 |
| 11  | 61.57148 | Trans fatty acid levels                                          | rs174550 |
| 11  | 61.57368 | LDL cholesterol                                                  | rs174551 |
| 11  | 61.57946 | Cholesterol, total                                               | rs174554 |
| 11  | 61.57976 | Glycerophospholipid levels                                       | rs174555 |

GWAS Catalog SNPs in Region

| chr | pos (Mb) | trait                                                                          | snp      |
|-----|----------|--------------------------------------------------------------------------------|----------|
| 11  | 61.57976 | Plasma omega-6 polyunsaturated fatty acid levels (dihomo-gamma-linolenic acid) | rs174555 |
| 11  | 61.57976 | Trans fatty acid levels                                                        | rs174555 |
| 11  | 61.58064 | Blood metabolite levels                                                        | rs174556 |
| 11  | 61.58064 | Trans fatty acid levels                                                        | rs174556 |
| 11  | 61.59556 | Glycerophospholipid levels                                                     | rs968567 |
| 11  | 61.59556 | Rheumatoid arthritis                                                           | rs968567 |
| 11  | 61.59556 | Blood metabolite levels                                                        | rs968567 |
| 11  | 61.59721 | Cholesterol, total                                                             | rs174570 |
| 11  | 61.59721 | LDL cholesterol                                                                | rs174570 |
| 11  | 61.59721 | HDL cholesterol                                                                | rs174570 |
| 11  | 61.59721 | Glycated hemoglobin levels                                                     | rs174570 |
| 11  | 61.59721 | Trans fatty acid levels                                                        | rs174570 |
| 11  | 61.59797 | Phospholipid levels (plasma)                                                   | rs1535   |
| 11  | 61.59797 | Metabolic syndrome                                                             | rs1535   |
| 11  | 61.59797 | Response to statin therapy                                                     | rs1535   |
| 11  | 61.59797 | Glycerophospholipid levels                                                     | rs1535   |
| 11  | 61.59797 | Inflammatory bowel disease                                                     | rs1535   |
| 11  | 61.59797 | Trans fatty acid levels                                                        | rs1535   |
| 11  | 61.60034 | Phospholipid levels (plasma)                                                   | rs174574 |
| 11  | 61.60034 | Trans fatty acid levels                                                        | rs174574 |
| 11  | 61.60034 | C-reactive protein levels or LDL-cholesterol levels (pleiotropy)               | rs174574 |

GWAS Catalog SNPs in Region

| chr | pos (Mb) | trait                                                               | snp       |
|-----|----------|---------------------------------------------------------------------|-----------|
| 11  | 61.60191 | Trans fatty acid levels                                             | rs2845573 |
| 11  | 61.60200 | Trans fatty acid levels                                             | rs174575  |
| 11  | 61.60324 | Plasma omega-6 polyunsaturated fatty acid levels (linoleic acid)    | rs2727270 |
| 11  | 61.60324 | Trans fatty acid levels                                             | rs2727270 |
| 11  | 61.60336 | Blood metabolite levels                                             | rs2727271 |
| 11  | 61.60336 | Trans fatty acid levels                                             | rs2727271 |
| 11  | 61.60351 | Glycerophospholipid levels                                          | rs174576  |
| 11  | 61.60351 | Trans fatty acid levels                                             | rs174576  |
| 11  | 61.60478 | Trans fatty acid levels                                             | rs2524299 |
| 11  | 61.60481 | Iron status biomarkers (transferrin levels)                         | rs174577  |
| 11  | 61.60481 | Plasma omega-6 polyunsaturated fatty acid levels (arachidonic acid) | rs174577  |
| 11  | 61.60481 | P wave duration                                                     | rs174577  |
| 11  | 61.60481 | Trans fatty acid levels                                             | rs174577  |
| 11  | 61.60481 | QRS duration                                                        | rs174577  |
| 11  | 61.60522 | Trans fatty acid levels                                             | rs2072114 |
| 11  | 61.60550 | Glycerophospholipid levels                                          | rs174578  |
| 11  | 61.60550 | Plasma omega-6 polyunsaturated fatty acid levels (linoleic acid)    | rs174578  |
| 11  | 61.60550 | Blood metabolite levels                                             | rs174578  |
| 11  | 61.60550 | Trans fatty acid levels                                             | rs174578  |
| 11  | 61.60975 | Response to statin therapy                                          | rs174583  |
| 11  | 61.60975 | QT interval                                                         | rs174583  |

GWAS Catalog SNPs in Region

| chr | pos (Mb) | trait                                      | snp        |
|-----|----------|--------------------------------------------|------------|
| 11  | 61.60975 | Trans fatty acid levels                    | rs174583   |
| 11  | 61.61601 | Trans fatty acid levels                    | rs2851682  |
| 11  | 61.61601 | Gestational age at birth (child effect)    | rs2851682  |
| 11  | 61.62314 | Liver enzyme levels (alkaline phosphatase) | rs174601   |
| 11  | 61.62314 | Blood metabolite levels                    | rs174601   |
| 11  | 61.62314 | Red blood cell fatty acid levels           | rs174601   |
| 11  | 61.62314 | Trans fatty acid levels                    | rs174601   |
| 11  | 61.62379 | Trans fatty acid levels                    | rs2526678  |
| 11  | 61.63949 | Trans fatty acid levels                    | rs422249   |
| 11  | 61.63957 | Phospholipid levels (plasma)               | rs174448   |
| 11  | 61.63957 | Trans fatty acid levels                    | rs174448   |
| 11  | 61.64038 | Trans fatty acid levels                    | rs174449   |
| 11  | 61.65530 | Sphingolipid levels                        | rs1000778  |
| 11  | 61.66369 | Phospholipid levels (plasma)               | rs174468   |
| 11  | 61.67875 | Sphingolipid levels                        | rs174479   |
| 11  | 61.71148 | Phospholipid levels (plasma)               | rs2521572  |
| 11  | 61.71213 | Estradiol levels                           | rs2727261  |
| 11  | 61.72264 | Phospholipid levels (plasma)               | rs1109748  |
| 11  | 61.74629 | Phospholipid levels (plasma)               | rs10792320 |
| 11  | 61.79559 | Phospholipid levels (plasma)               | rs11230874 |
| 11  | 61.81580 | Phospholipid levels (plasma)               | rs4963452  |

## GWAS Catalog SNPs in Region

| <b>chr</b> | <b>pos (Mb)</b> | <b>trait</b>                                                            | <b>snp</b>  |
|------------|-----------------|-------------------------------------------------------------------------|-------------|
| 11         | 61.96393        | 3-hydroxypropylmercapturic acid levels in smokers                       | rs189478926 |
| 11         | 62.00141        | Plasma omega-6 polyunsaturated fatty acid levels (gamma-linolenic acid) | rs12806663  |
| 11         | 62.06135        | HIV-1 viral setpoint                                                    | rs11231017  |
| 11         | 62.10342        | Chronic obstructive pulmonary disease-related biomarkers                | rs2463822   |
| 11         | 62.14169        | 3-hydroxypropylmercapturic acid levels in smokers                       | rs184485201 |

# SWI\_T2star\_left\_pallidum\_plus\_right\_pallidum

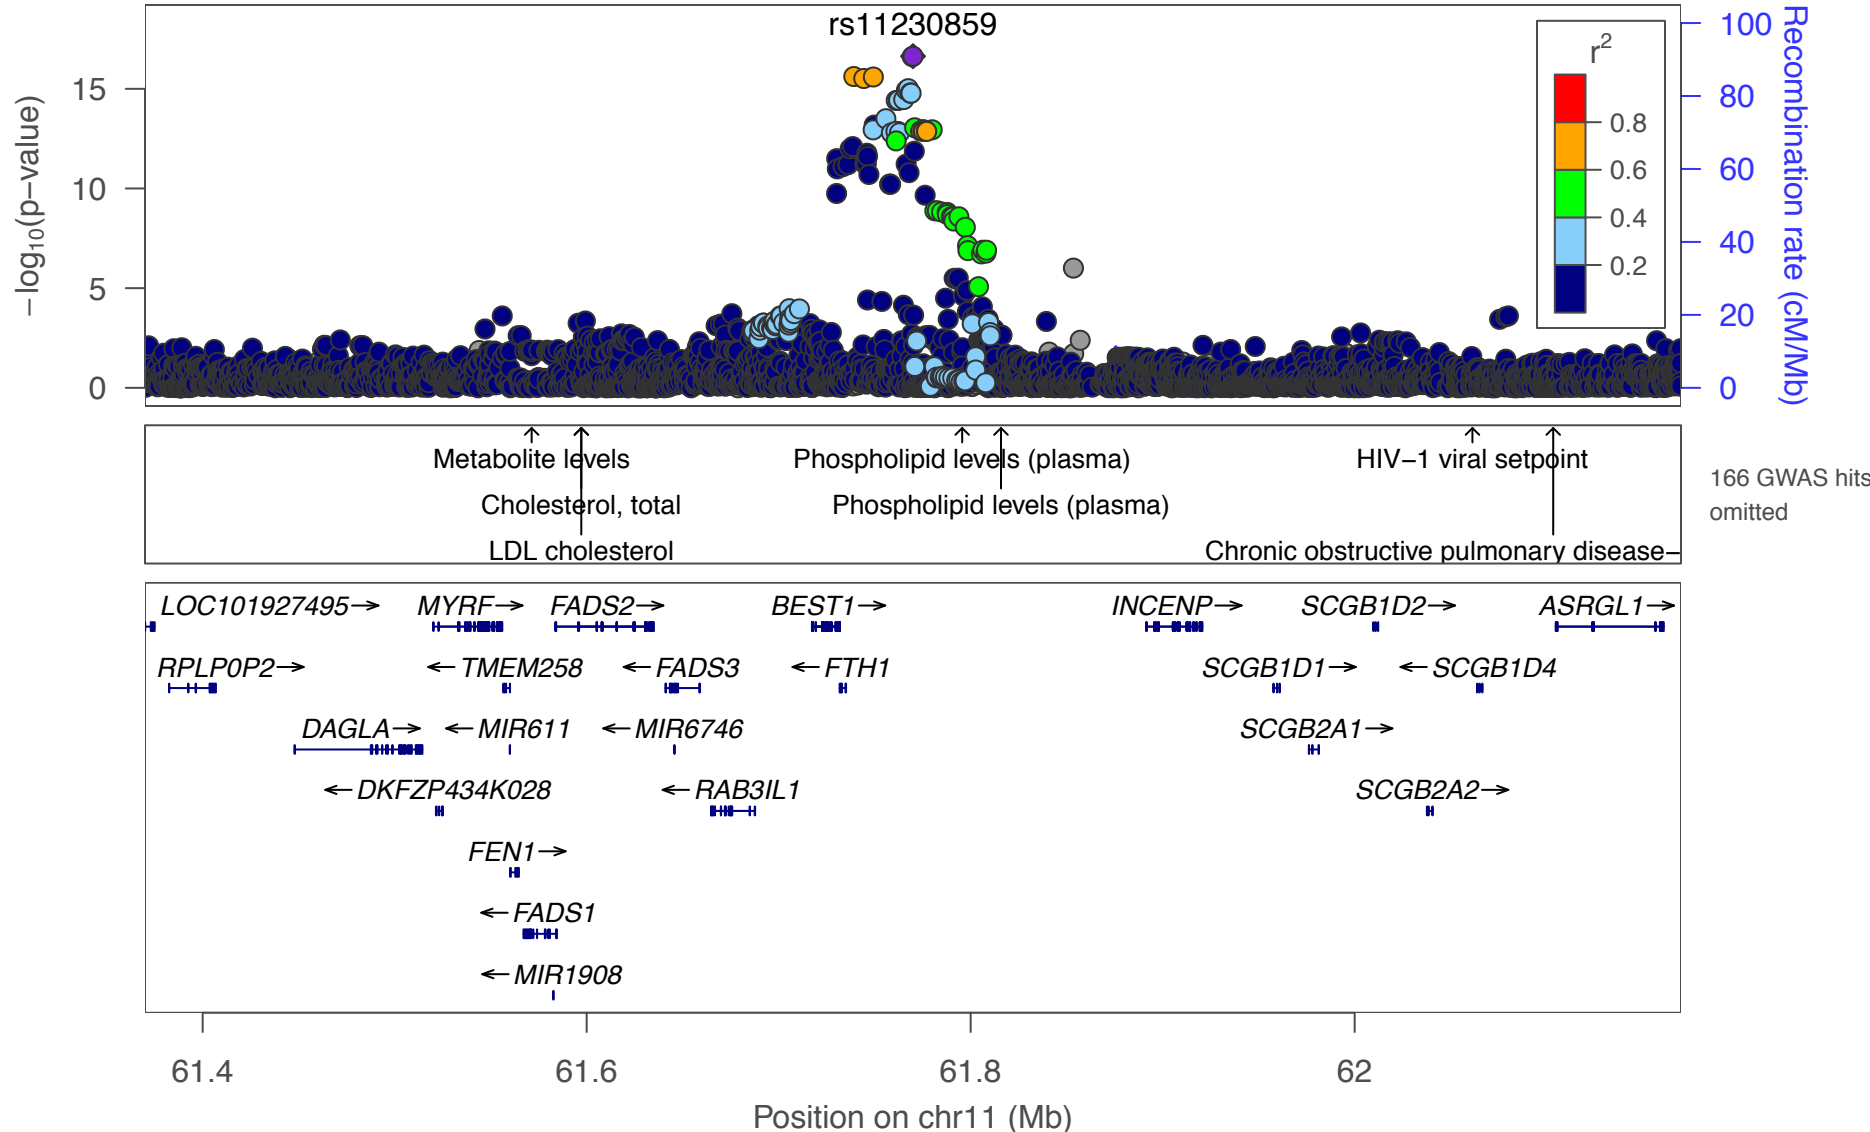

date: Thu Aug 17 19:04:48 2017

build: hg19

display range: chr11:61369972–62169972 [61369972–62169972]

hilite range: 0 – 0 [ 0 – 0 ]

reference SNP: chr11:61769972

number of SNPs plotted: 3667

min P.value: 2.31E–17 [chr11:61769972]

max P.value: 9.98E–1 [chr11:61529267]

omitted GWAS Hits: chr11:61.795586–Phospholipid levels (plasma), chr11:61.815803–Phospholipid levels (plasma)

omitted GWAS Hits: chr11:62.061349–HIV–1 viral setpoint, NA

omitted GWAS Hits: NA, NA

Make more plots at <http://csg.sph.umich.edu/locuszoom/>

omitted GWAS Hits: NA, NA

GWAS Catalog SNPs in Region

| chr | pos (Mb) | trait                                                                          | snp        |
|-----|----------|--------------------------------------------------------------------------------|------------|
| 11  | 61.41747 | Phospholipid levels (plasma)                                                   | rs1692120  |
| 11  | 61.44249 | Plasma omega-6 polyunsaturated fatty acid levels (gamma-linolenic acid)        | rs7925523  |
| 11  | 61.45860 | Plasma omega-6 polyunsaturated fatty acid levels (linoleic acid)               | rs11827215 |
| 11  | 61.48516 | 3-hydroxypropylmercapturic acid levels in smokers                              | rs10488693 |
| 11  | 61.49049 | Phospholipid levels (plasma)                                                   | rs198426   |
| 11  | 61.49433 | Immune reponse to smallpox (secreted IL-2)                                     | rs4963243  |
| 11  | 61.54350 | Plasma omega-6 polyunsaturated fatty acid levels (arachidonic acid)            | rs174528   |
| 11  | 61.54350 | Trans fatty acid levels                                                        | rs174528   |
| 11  | 61.54396 | HDL cholesterol                                                                | rs174529   |
| 11  | 61.54396 | Triglycerides                                                                  | rs174529   |
| 11  | 61.54724 | Trans fatty acid levels                                                        | rs108499   |
| 11  | 61.54856 | Plasma omega-3 polyunsaturated fatty acid levels (alpha-linolenic acid)        | rs509360   |
| 11  | 61.54856 | Trans fatty acid levels                                                        | rs509360   |
| 11  | 61.54946 | Plasma omega-6 polyunsaturated fatty acid levels (dihomo-gamma-linolenic acid) | rs174534   |
| 11  | 61.54946 | Trans fatty acid levels                                                        | rs174534   |
| 11  | 61.55136 | Phospholipid levels (plasma)                                                   | rs174535   |
| 11  | 61.55136 | Blood metabolite levels                                                        | rs174535   |
| 11  | 61.55136 | Red blood cell fatty acid levels                                               | rs174535   |
| 11  | 61.55136 | Trans fatty acid levels                                                        | rs174535   |
| 11  | 61.55193 | Phospholipid levels (plasma)                                                   | rs174536   |
| 11  | 61.55193 | Glycerophospholipid levels                                                     | rs174536   |



GWAS Catalog SNPs in Region

| chr | pos (Mb) | trait                                                                   | snp      |
|-----|----------|-------------------------------------------------------------------------|----------|
| 11  | 61.55193 | Plasma omega-3 polyunsaturated fatty acid levels (alphalinolenic acid)  | rs174536 |
| 11  | 61.55193 | Trans fatty acid levels                                                 | rs174536 |
| 11  | 61.55193 | Resting heart rate                                                      | rs174536 |
| 11  | 61.55268 | Crohn's disease                                                         | rs174537 |
| 11  | 61.55268 | Glycerophospholipid levels                                              | rs174537 |
| 11  | 61.55268 | Plasma omega-6 polyunsaturated fatty acid levels (gamma-linolenic acid) | rs174537 |
| 11  | 61.55268 | Colorectal cancer                                                       | rs174537 |
| 11  | 61.55268 | Trans fatty acid levels                                                 | rs174537 |
| 11  | 61.55780 | Phospholipid levels (plasma)                                            | rs102275 |
| 11  | 61.55780 | Metabolic syndrome                                                      | rs102275 |
| 11  | 61.55780 | Plasma omega-6 polyunsaturated fatty acid levels (arachidonic acid)     | rs102275 |
| 11  | 61.55780 | Metabolite levels                                                       | rs102275 |
| 11  | 61.55780 | Oleic acid (18:1n-9) plasma levels                                      | rs102275 |
| 11  | 61.55780 | Crohn's disease                                                         | rs102275 |
| 11  | 61.55780 | Glycerophospholipid levels                                              | rs102275 |
| 11  | 61.55780 | Trans fatty acid levels                                                 | rs102275 |
| 11  | 61.55780 | Palmitoleic acid (16:1n-7) plasma levels                                | rs102275 |
| 11  | 61.55780 | Stearic acid (18:0) plasma levels                                       | rs102275 |
| 11  | 61.56008 | Phospholipid levels (plasma)                                            | rs174538 |
| 11  | 61.56008 | Blood metabolite levels                                                 | rs174538 |
| 11  | 61.56008 | Trans fatty acid levels                                                 | rs174538 |

GWAS Catalog SNPs in Region

| chr | pos (Mb) | trait                                                                   | snp       |
|-----|----------|-------------------------------------------------------------------------|-----------|
| 11  | 61.56430 | Phospholipid levels (plasma)                                            | rs4246215 |
| 11  | 61.56430 | Platelet count                                                          | rs4246215 |
| 11  | 61.56430 | Inflammatory bowel disease                                              | rs4246215 |
| 11  | 61.56430 | Red blood cell fatty acid levels                                        | rs4246215 |
| 11  | 61.56430 | Trans fatty acid levels                                                 | rs4246215 |
| 11  | 61.56591 | Metabolite levels                                                       | rs174541  |
| 11  | 61.56591 | Red blood cell fatty acid levels                                        | rs174541  |
| 11  | 61.56591 | Trans fatty acid levels                                                 | rs174541  |
| 11  | 61.56931 | Delta-6 desaturase activity                                             | rs174545  |
| 11  | 61.56931 | Red blood cell fatty acid levels                                        | rs174545  |
| 11  | 61.56931 | Trans fatty acid levels                                                 | rs174545  |
| 11  | 61.56983 | LDL cholesterol                                                         | rs174546  |
| 11  | 61.56983 | HDL cholesterol                                                         | rs174546  |
| 11  | 61.56983 | Triglycerides                                                           | rs174546  |
| 11  | 61.56983 | Cholesterol, total                                                      | rs174546  |
| 11  | 61.56983 | Metabolic syndrome                                                      | rs174546  |
| 11  | 61.56983 | Glycerophospholipid levels                                              | rs174546  |
| 11  | 61.56983 | Plasma omega-6 polyunsaturated fatty acid levels (gamma-linolenic acid) | rs174546  |
| 11  | 61.56983 | Trans fatty acid levels                                                 | rs174546  |
| 11  | 61.56983 | C-reactive protein levels or triglyceride levels (pleiotropy)           | rs174546  |
| 11  | 61.56983 | C-reactive protein levels or HDL-cholesterol levels (pleiotropy)        | rs174546  |

GWAS Catalog SNPs in Region

| chr | pos (Mb) | trait                                                                          | snp      |
|-----|----------|--------------------------------------------------------------------------------|----------|
| 11  | 61.57078 | HDL cholesterol                                                                | rs174547 |
| 11  | 61.57078 | Triglycerides                                                                  | rs174547 |
| 11  | 61.57078 | Phospholipid levels (plasma)                                                   | rs174547 |
| 11  | 61.57078 | Resting heart rate                                                             | rs174547 |
| 11  | 61.57078 | Metabolic traits                                                               | rs174547 |
| 11  | 61.57078 | Lipid metabolism phenotypes                                                    | rs174547 |
| 11  | 61.57078 | Comprehensive strength and appendicular lean mass                              | rs174547 |
| 11  | 61.57078 | Glycerophospholipid levels                                                     | rs174547 |
| 11  | 61.57078 | Sphingolipid levels                                                            | rs174547 |
| 11  | 61.57078 | Metabolite levels (lipid measures)                                             | rs174547 |
| 11  | 61.57078 | Plasma omega-6 polyunsaturated fatty acid levels (linoleic acid)               | rs174547 |
| 11  | 61.57078 | Plasma omega-6 polyunsaturated fatty acid levels (gamma-linolenic acid)        | rs174547 |
| 11  | 61.57078 | Plasma omega-6 polyunsaturated fatty acid levels (arachidonic acid)            | rs174547 |
| 11  | 61.57078 | Height                                                                         | rs174547 |
| 11  | 61.57078 | Trans fatty acid levels                                                        | rs174547 |
| 11  | 61.57135 | Metabolite levels                                                              | rs174548 |
| 11  | 61.57135 | HDL cholesterol                                                                | rs174548 |
| 11  | 61.57135 | Triglycerides                                                                  | rs174548 |
| 11  | 61.57135 | Blood metabolite ratios                                                        | rs174548 |
| 11  | 61.57135 | Plasma omega-6 polyunsaturated fatty acid levels (dihomo-gamma-linolenic acid) | rs174548 |
| 11  | 61.57135 | Delta-6 desaturase activity                                                    | rs174548 |

GWAS Catalog SNPs in Region

| chr | pos (Mb) | trait                                                            | snp      |
|-----|----------|------------------------------------------------------------------|----------|
| 11  | 61.57135 | Blood metabolite levels                                          | rs174548 |
| 11  | 61.57135 | Hematology traits                                                | rs174548 |
| 11  | 61.57135 | Trans fatty acid levels                                          | rs174548 |
| 11  | 61.57138 | Laryngeal squamous cell carcinoma                                | rs174549 |
| 11  | 61.57138 | Comprehensive strength and appendicular lean mass                | rs174549 |
| 11  | 61.57138 | Heart rate                                                       | rs174549 |
| 11  | 61.57138 | Metabolite levels                                                | rs174549 |
| 11  | 61.57138 | Red blood cell fatty acid levels                                 | rs174549 |
| 11  | 61.57138 | Trans fatty acid levels                                          | rs174549 |
| 11  | 61.57148 | Phospholipid levels (plasma)                                     | rs174550 |
| 11  | 61.57148 | Fasting glucose-related traits                                   | rs174550 |
| 11  | 61.57148 | Fasting glucose-related traits (interaction with BMI)            | rs174550 |
| 11  | 61.57148 | Glycerophospholipid levels                                       | rs174550 |
| 11  | 61.57148 | Plasma omega-6 polyunsaturated fatty acid levels (linoleic acid) | rs174550 |
| 11  | 61.57148 | Plasma omega-6 polyunsaturated fatty acid levels (adrenic acid)  | rs174550 |
| 11  | 61.57148 | Blood metabolite levels                                          | rs174550 |
| 11  | 61.57148 | Red blood cell fatty acid levels                                 | rs174550 |
| 11  | 61.57148 | Trans fatty acid levels                                          | rs174550 |
| 11  | 61.57368 | LDL cholesterol                                                  | rs174551 |
| 11  | 61.57946 | Cholesterol, total                                               | rs174554 |
| 11  | 61.57976 | Glycerophospholipid levels                                       | rs174555 |

GWAS Catalog SNPs in Region

| chr | pos (Mb) | trait                                                                          | snp      |
|-----|----------|--------------------------------------------------------------------------------|----------|
| 11  | 61.57976 | Plasma omega-6 polyunsaturated fatty acid levels (dihomo-gamma-linolenic acid) | rs174555 |
| 11  | 61.57976 | Trans fatty acid levels                                                        | rs174555 |
| 11  | 61.58064 | Blood metabolite levels                                                        | rs174556 |
| 11  | 61.58064 | Trans fatty acid levels                                                        | rs174556 |
| 11  | 61.59556 | Glycerophospholipid levels                                                     | rs968567 |
| 11  | 61.59556 | Rheumatoid arthritis                                                           | rs968567 |
| 11  | 61.59556 | Blood metabolite levels                                                        | rs968567 |
| 11  | 61.59721 | Cholesterol, total                                                             | rs174570 |
| 11  | 61.59721 | LDL cholesterol                                                                | rs174570 |
| 11  | 61.59721 | HDL cholesterol                                                                | rs174570 |
| 11  | 61.59721 | Glycated hemoglobin levels                                                     | rs174570 |
| 11  | 61.59721 | Trans fatty acid levels                                                        | rs174570 |
| 11  | 61.59797 | Phospholipid levels (plasma)                                                   | rs1535   |
| 11  | 61.59797 | Metabolic syndrome                                                             | rs1535   |
| 11  | 61.59797 | Response to statin therapy                                                     | rs1535   |
| 11  | 61.59797 | Glycerophospholipid levels                                                     | rs1535   |
| 11  | 61.59797 | Inflammatory bowel disease                                                     | rs1535   |
| 11  | 61.59797 | Trans fatty acid levels                                                        | rs1535   |
| 11  | 61.60034 | Phospholipid levels (plasma)                                                   | rs174574 |
| 11  | 61.60034 | Trans fatty acid levels                                                        | rs174574 |
| 11  | 61.60034 | C-reactive protein levels or LDL-cholesterol levels (pleiotropy)               | rs174574 |

GWAS Catalog SNPs in Region

| chr | pos (Mb) | trait                                                               | snp       |
|-----|----------|---------------------------------------------------------------------|-----------|
| 11  | 61.60191 | Trans fatty acid levels                                             | rs2845573 |
| 11  | 61.60200 | Trans fatty acid levels                                             | rs174575  |
| 11  | 61.60324 | Plasma omega-6 polyunsaturated fatty acid levels (linoleic acid)    | rs2727270 |
| 11  | 61.60324 | Trans fatty acid levels                                             | rs2727270 |
| 11  | 61.60336 | Blood metabolite levels                                             | rs2727271 |
| 11  | 61.60336 | Trans fatty acid levels                                             | rs2727271 |
| 11  | 61.60351 | Glycerophospholipid levels                                          | rs174576  |
| 11  | 61.60351 | Trans fatty acid levels                                             | rs174576  |
| 11  | 61.60478 | Trans fatty acid levels                                             | rs2524299 |
| 11  | 61.60481 | Iron status biomarkers (transferrin levels)                         | rs174577  |
| 11  | 61.60481 | Plasma omega-6 polyunsaturated fatty acid levels (arachidonic acid) | rs174577  |
| 11  | 61.60481 | P wave duration                                                     | rs174577  |
| 11  | 61.60481 | Trans fatty acid levels                                             | rs174577  |
| 11  | 61.60481 | QRS duration                                                        | rs174577  |
| 11  | 61.60522 | Trans fatty acid levels                                             | rs2072114 |
| 11  | 61.60550 | Glycerophospholipid levels                                          | rs174578  |
| 11  | 61.60550 | Plasma omega-6 polyunsaturated fatty acid levels (linoleic acid)    | rs174578  |
| 11  | 61.60550 | Blood metabolite levels                                             | rs174578  |
| 11  | 61.60550 | Trans fatty acid levels                                             | rs174578  |
| 11  | 61.60975 | Response to statin therapy                                          | rs174583  |
| 11  | 61.60975 | QT interval                                                         | rs174583  |

GWAS Catalog SNPs in Region

| chr | pos (Mb) | trait                                      | snp        |
|-----|----------|--------------------------------------------|------------|
| 11  | 61.60975 | Trans fatty acid levels                    | rs174583   |
| 11  | 61.61601 | Trans fatty acid levels                    | rs2851682  |
| 11  | 61.61601 | Gestational age at birth (child effect)    | rs2851682  |
| 11  | 61.62314 | Liver enzyme levels (alkaline phosphatase) | rs174601   |
| 11  | 61.62314 | Blood metabolite levels                    | rs174601   |
| 11  | 61.62314 | Red blood cell fatty acid levels           | rs174601   |
| 11  | 61.62314 | Trans fatty acid levels                    | rs174601   |
| 11  | 61.62379 | Trans fatty acid levels                    | rs2526678  |
| 11  | 61.63949 | Trans fatty acid levels                    | rs422249   |
| 11  | 61.63957 | Phospholipid levels (plasma)               | rs174448   |
| 11  | 61.63957 | Trans fatty acid levels                    | rs174448   |
| 11  | 61.64038 | Trans fatty acid levels                    | rs174449   |
| 11  | 61.65530 | Sphingolipid levels                        | rs1000778  |
| 11  | 61.66369 | Phospholipid levels (plasma)               | rs174468   |
| 11  | 61.67875 | Sphingolipid levels                        | rs174479   |
| 11  | 61.71148 | Phospholipid levels (plasma)               | rs2521572  |
| 11  | 61.71213 | Estradiol levels                           | rs2727261  |
| 11  | 61.72264 | Phospholipid levels (plasma)               | rs1109748  |
| 11  | 61.74629 | Phospholipid levels (plasma)               | rs10792320 |
| 11  | 61.79559 | Phospholipid levels (plasma)               | rs11230874 |
| 11  | 61.81580 | Phospholipid levels (plasma)               | rs4963452  |

## GWAS Catalog SNPs in Region

| <b>chr</b> | <b>pos (Mb)</b> | <b>trait</b>                                                            | <b>snp</b>  |
|------------|-----------------|-------------------------------------------------------------------------|-------------|
| 11         | 61.96393        | 3-hydroxypropylmercapturic acid levels in smokers                       | rs189478926 |
| 11         | 62.00141        | Plasma omega-6 polyunsaturated fatty acid levels (gamma-linolenic acid) | rs12806663  |
| 11         | 62.06135        | HIV-1 viral setpoint                                                    | rs11231017  |
| 11         | 62.10342        | Chronic obstructive pulmonary disease-related biomarkers                | rs2463822   |
| 11         | 62.14169        | 3-hydroxypropylmercapturic acid levels in smokers                       | rs184485201 |



# TBSS\_MO\_Pontine\_crossing\_tract

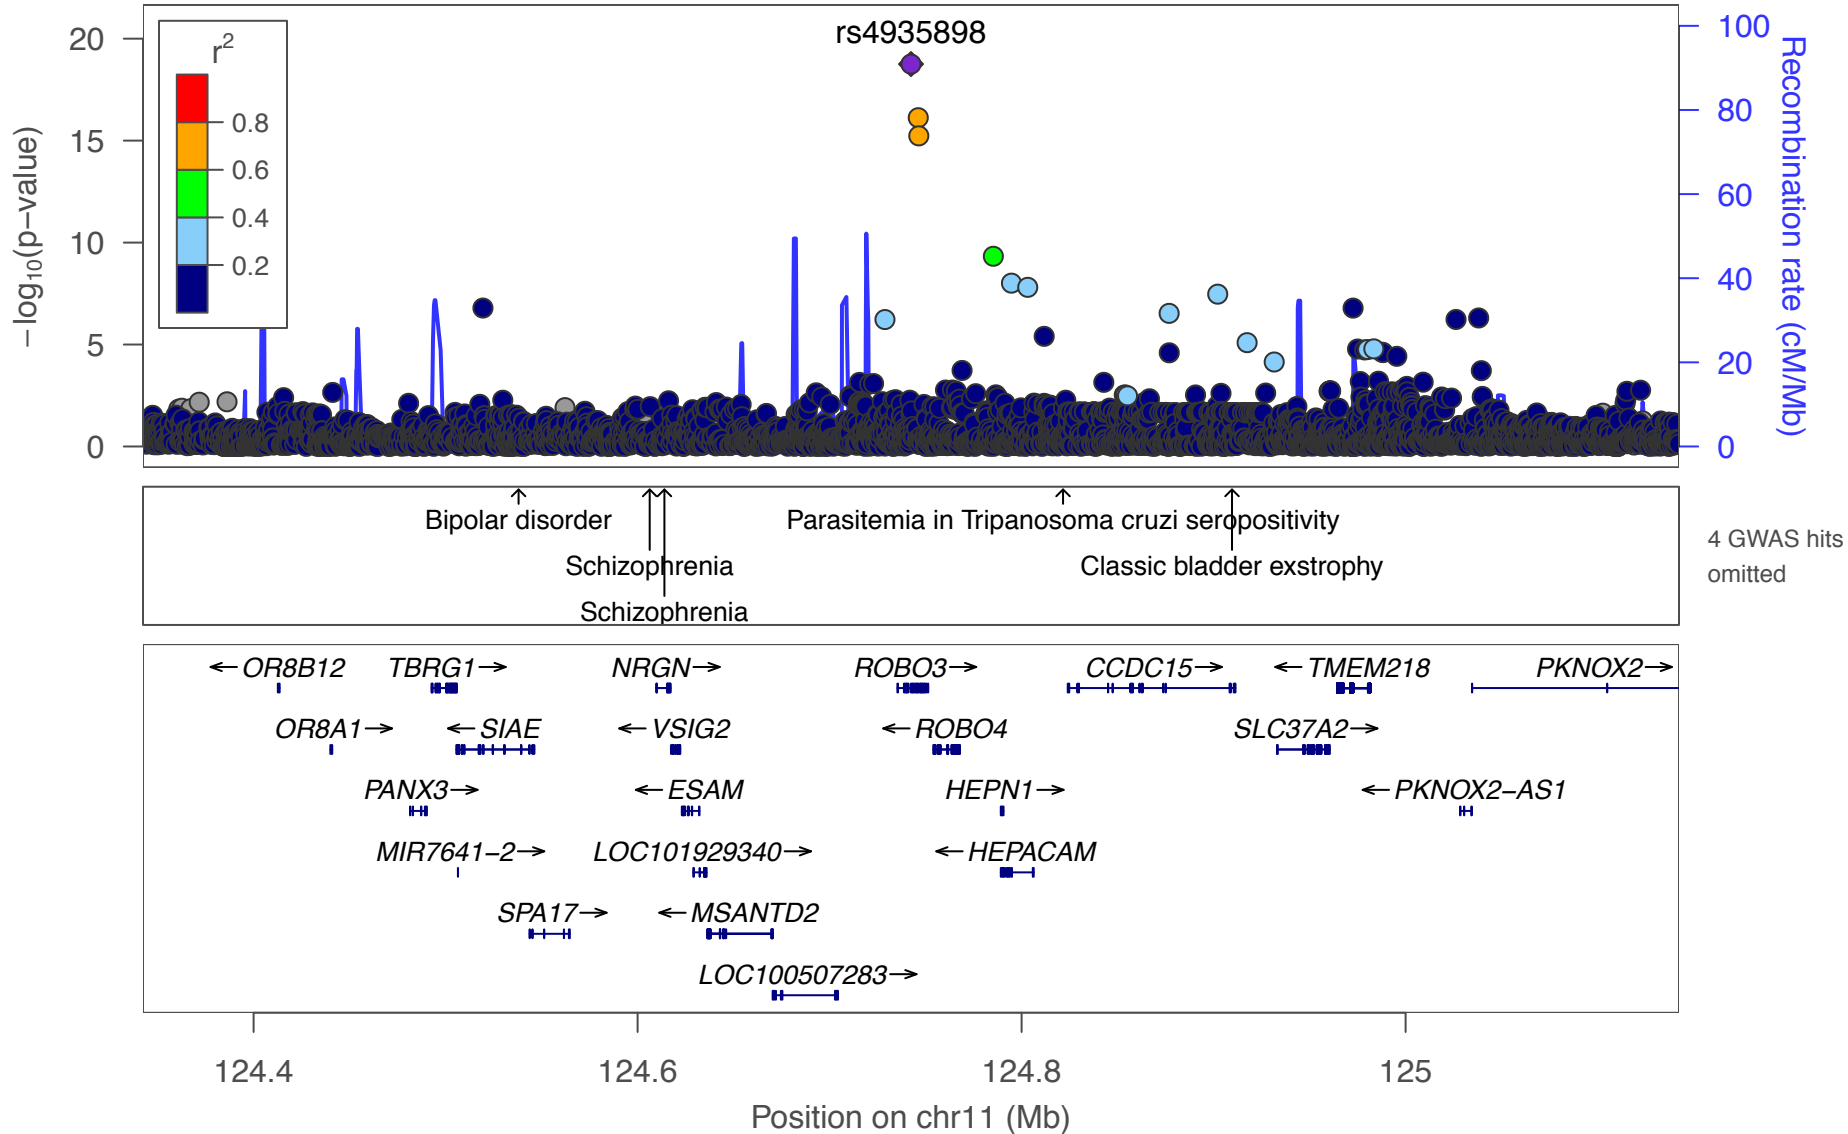

date: Thu Aug 17 18:53:13 2017

build: hg19

display range: chr11:124342385–125142385 [124342385–125142385]

hilite range: 0 – 0 [ 0 – 0 ]

reference SNP: chr11:124742385

number of SNPs plotted: 3762

min P.value: 1.76E–19 [chr11:124742385]

max P.value: 9.98E–1 [chr11:124882546]

omitted GWAS Hits: chr11:124.909582–Classic bladder exstrophy, NA

omitted GWAS Hits: NA

## GWAS Catalog SNPs in Region

| <b>chr</b> | <b>pos (Mb)</b> | <b>trait</b>                                                                   | <b>snp</b> |
|------------|-----------------|--------------------------------------------------------------------------------|------------|
| 11         | 124.4386        | Anxiety disorder                                                               | rs10893268 |
| 11         | 124.4613        | Schizophrenia                                                                  | rs7127399  |
| 11         | 124.5380        | Bipolar disorder                                                               | rs544368   |
| 11         | 124.5393        | Serum metabolite levels                                                        | rs12282107 |
| 11         | 124.6063        | Schizophrenia                                                                  | rs12807809 |
| 11         | 124.6140        | Schizophrenia                                                                  | rs55661361 |
| 11         | 124.8216        | Parasitemia in <i>Trypanosoma cruzi</i> seropositivity                         | rs4408325  |
| 11         | 124.9096        | Classic bladder exstrophy                                                      | rs76239813 |
| 11         | 124.9849        | Exploratory eye movement dysfunction in schizophrenia (cognitive search score) | rs663734   |

# volume\_Brain-Stem

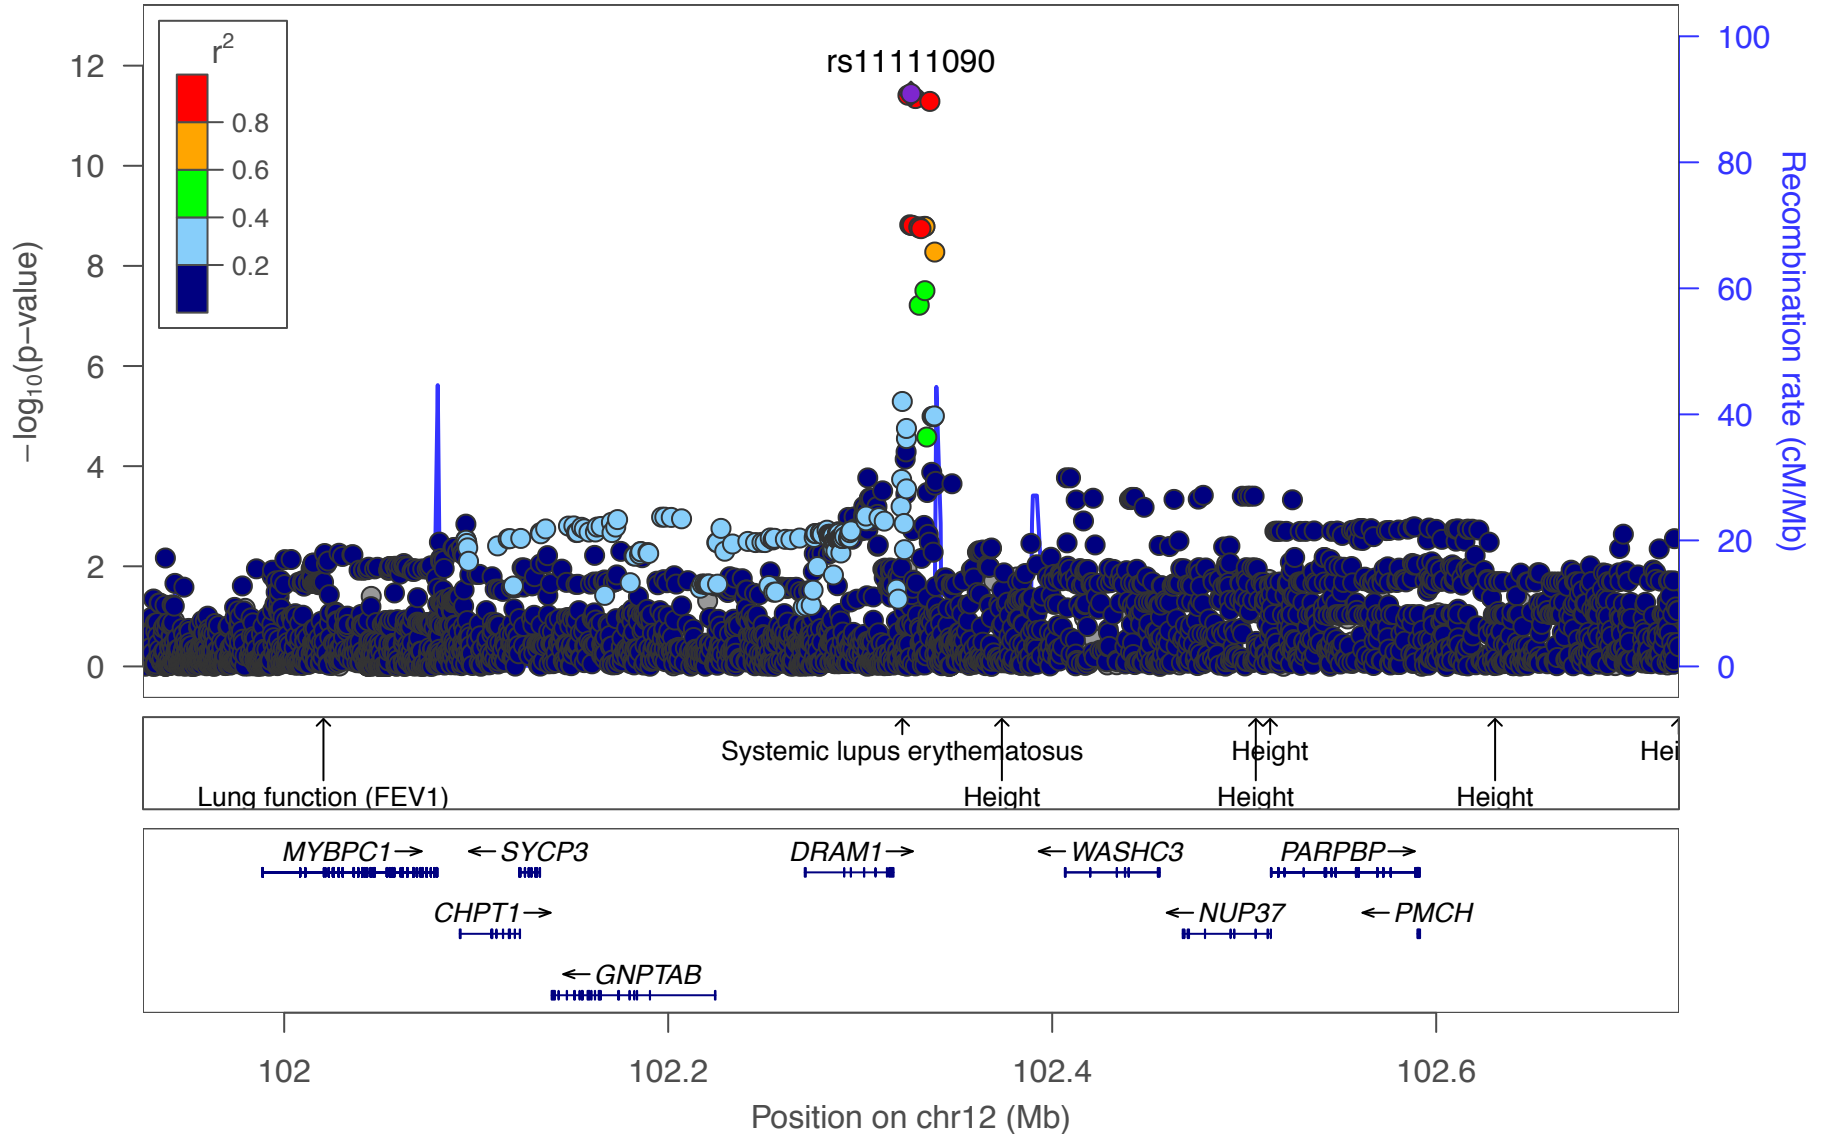

date: Thu Aug 17 19:07:51 2017

build: hg19

display range: chr12:101926461–102726461 [101926461–102726461]

hilite range: 0 – 0 [ 0 – 0 ]

reference SNP: chr12:102326461

number of SNPs plotted: 3709

min P.value: 3.61E–12 [chr12:102326461]

max P.value: 10E–1 [chr12:101931920]

## GWAS Catalog SNPs in Region

| <b>chr</b> | <b>pos (Mb)</b> | <b>trait</b>                 | <b>snp</b> |
|------------|-----------------|------------------------------|------------|
| 12         | 102.0204        | Lung function (FEV1)         | rs10860757 |
| 12         | 102.3219        | Systemic lupus erythematosus | rs4622329  |
| 12         | 102.3738        | Height                       | rs7971536  |
| 12         | 102.5060        | Height                       | rs2271266  |
| 12         | 102.5135        | Height                       | rs2292303  |
| 12         | 102.6307        | Height                       | rs7313075  |
| 12         | 102.7263        | Height                       | rs1520223  |

# volume\_Left-Cerebellum-White-Matter

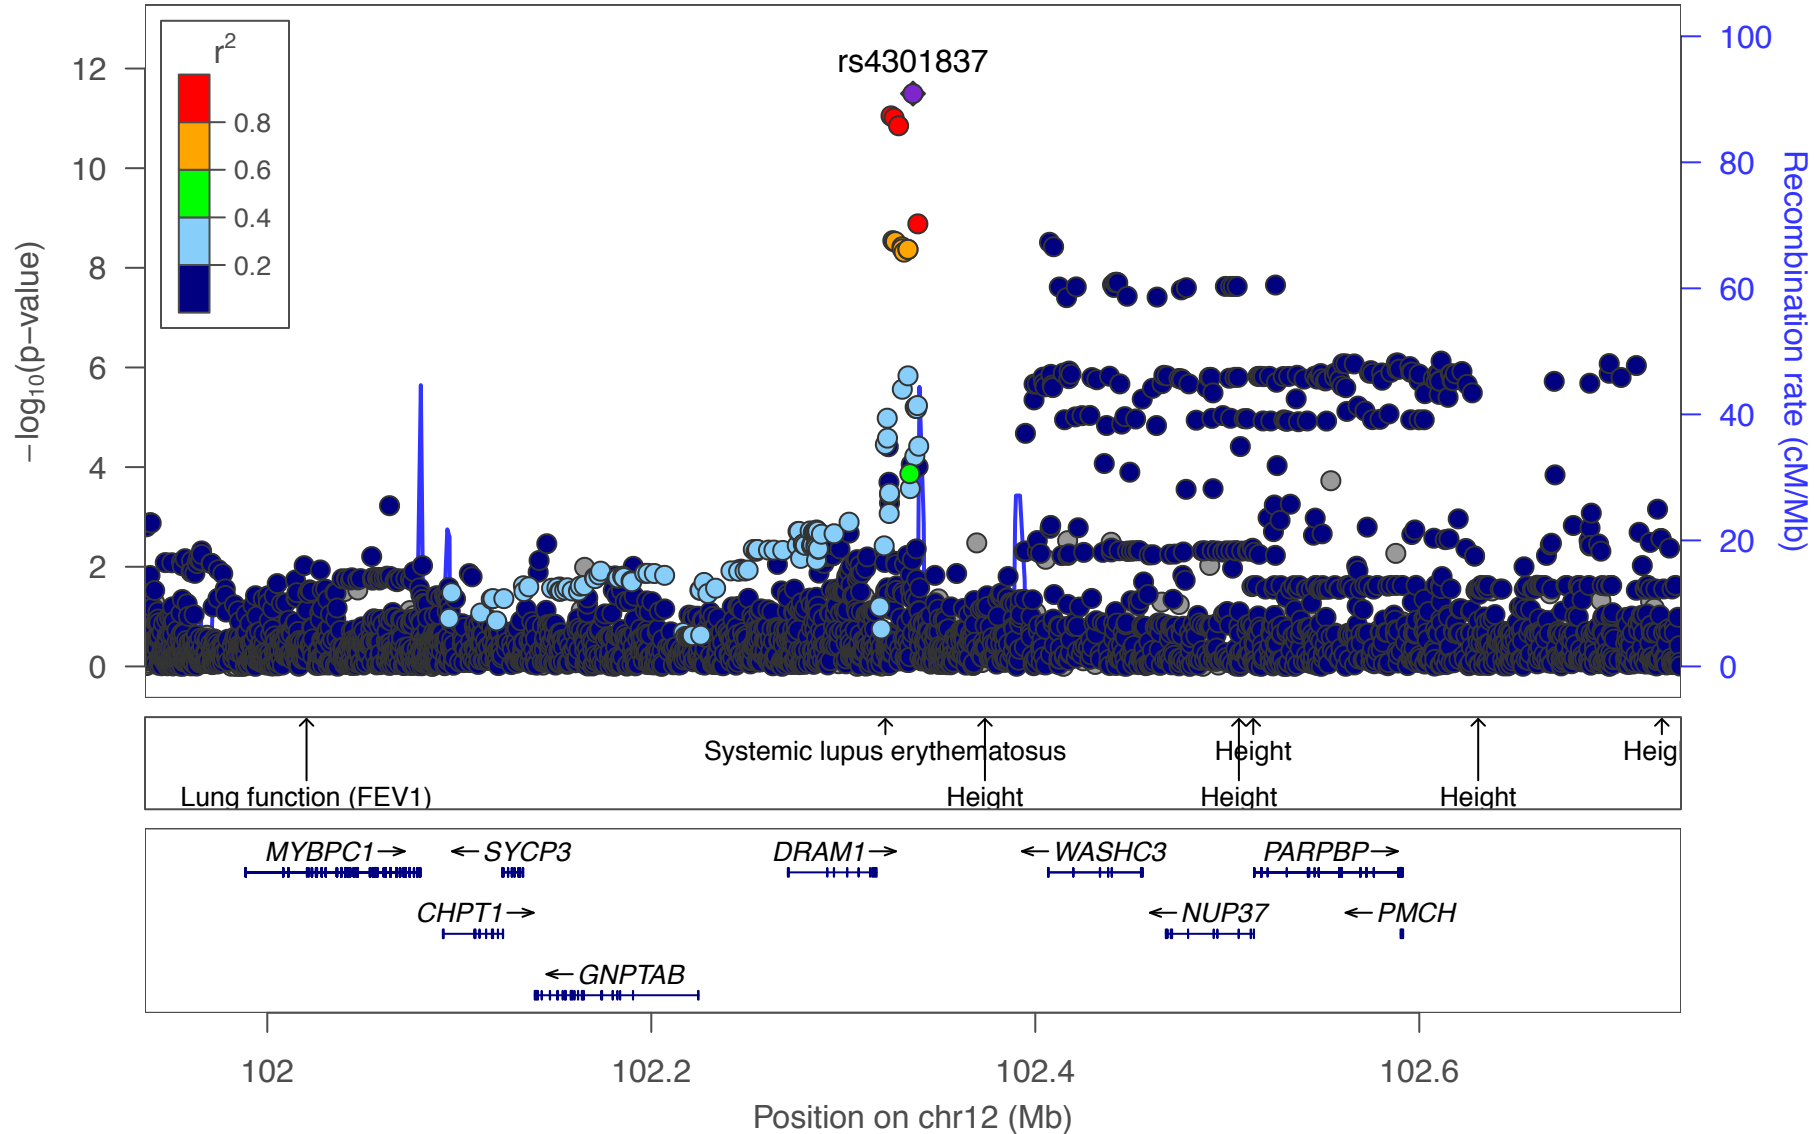

date: Thu Aug 17 19:08:20 2017

build: hg19

display range: chr12:101936310–102736310 [101936310–102736310]

hilite range: 0 – 0 [ 0 – 0 ]

reference SNP: chr12:102336310

number of SNPs plotted: 3703

min P.value: 3.18E–12 [chr12:102336310]

max P.value: 10E–1 [chr12:102529636]



## GWAS Catalog SNPs in Region

| <b>chr</b> | <b>pos (Mb)</b> | <b>trait</b>                 | <b>snp</b> |
|------------|-----------------|------------------------------|------------|
| 12         | 102.0204        | Lung function (FEV1)         | rs10860757 |
| 12         | 102.3219        | Systemic lupus erythematosus | rs4622329  |
| 12         | 102.3738        | Height                       | rs7971536  |
| 12         | 102.5060        | Height                       | rs2271266  |
| 12         | 102.5135        | Height                       | rs2292303  |
| 12         | 102.6307        | Height                       | rs7313075  |
| 12         | 102.7263        | Height                       | rs1520223  |

# volume\_Right-Cerebellum-White-Matter

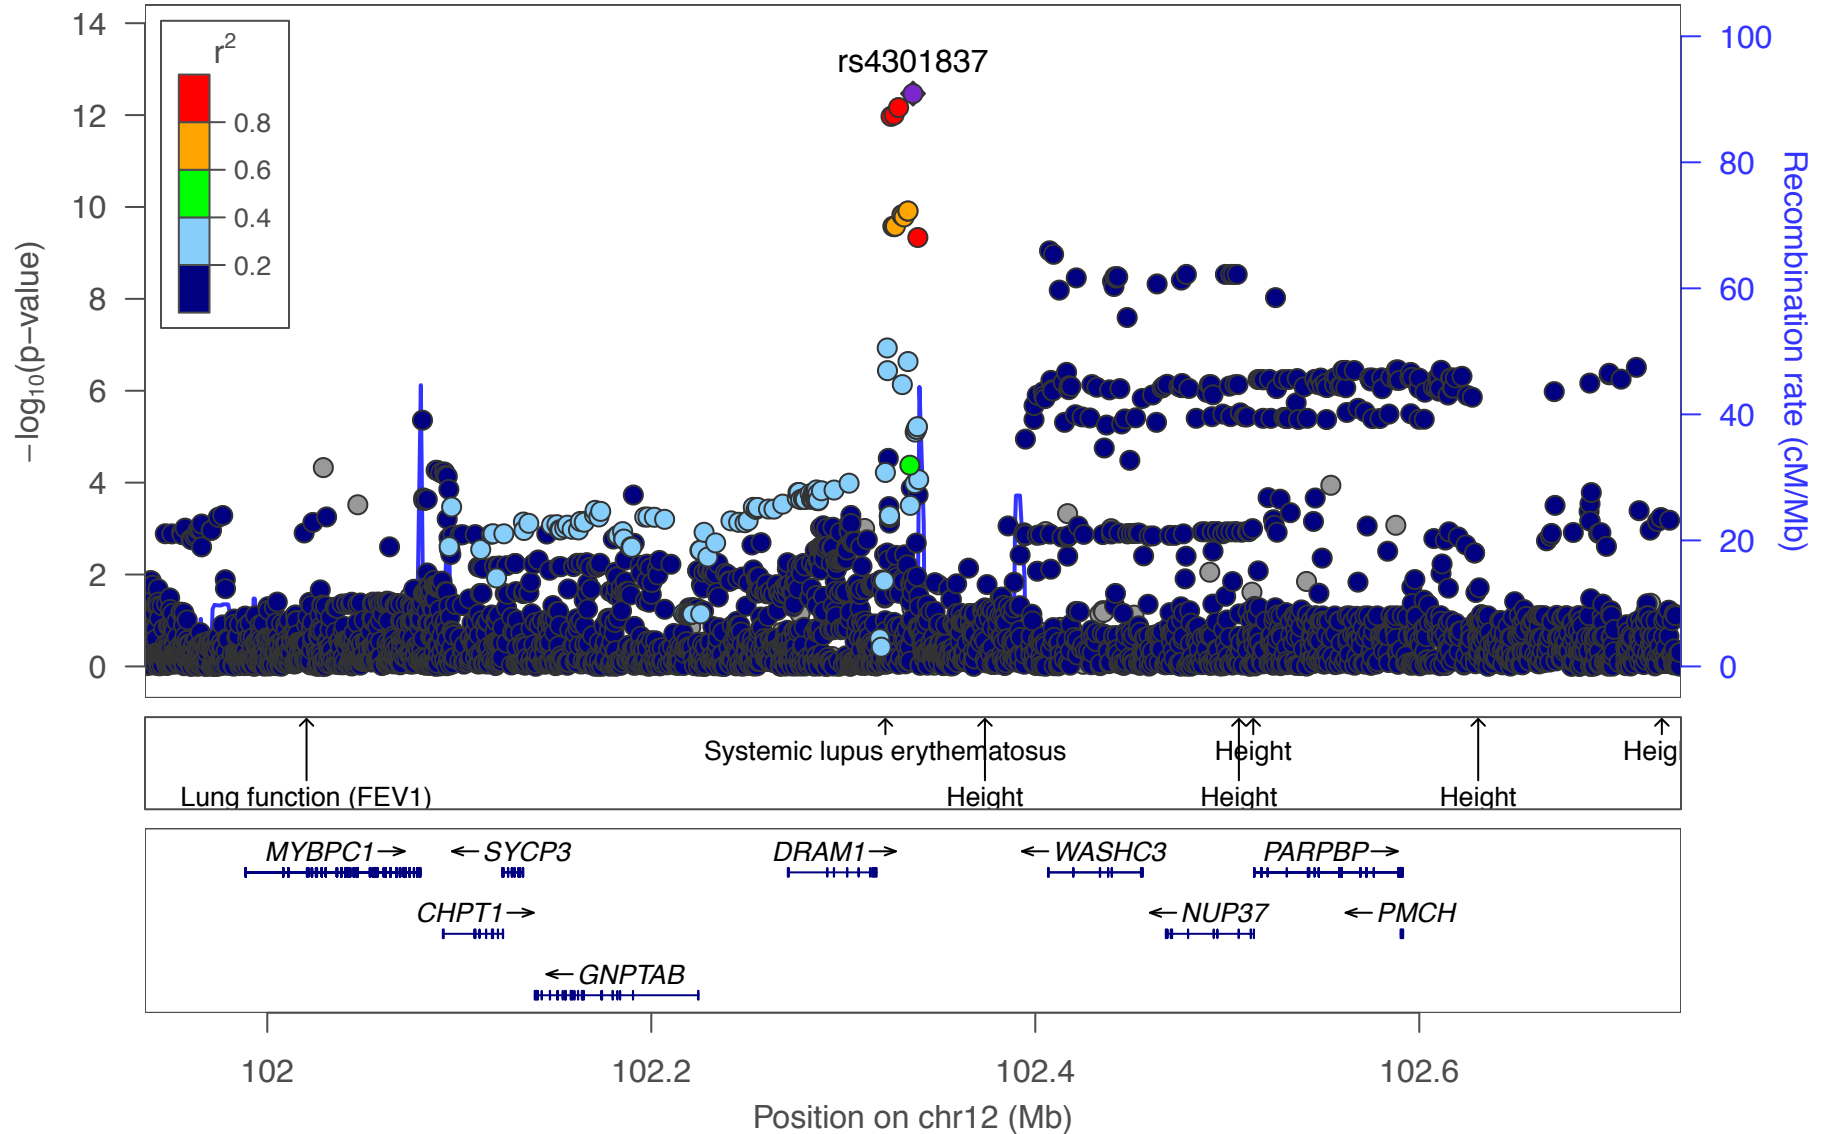

date: Thu Aug 17 18:53:18 2017

build: hg19

display range: chr12:101936310–102736310 [101936310–102736310]

hilite range: 0 – 0 [ 0 – 0 ]

reference SNP: chr12:102336310

number of SNPs plotted: 3703

min P.value: 3.4E–13 [chr12:102336310]

max P.value: 10E–1 [chr12:102689357]

## GWAS Catalog SNPs in Region

| <b>chr</b> | <b>pos (Mb)</b> | <b>trait</b>                 | <b>snp</b> |
|------------|-----------------|------------------------------|------------|
| 12         | 102.0204        | Lung function (FEV1)         | rs10860757 |
| 12         | 102.3219        | Systemic lupus erythematosus | rs4622329  |
| 12         | 102.3738        | Height                       | rs7971536  |
| 12         | 102.5060        | Height                       | rs2271266  |
| 12         | 102.5135        | Height                       | rs2292303  |
| 12         | 102.6307        | Height                       | rs7313075  |
| 12         | 102.7263        | Height                       | rs1520223  |

# FAST\_ROIs\_L\_hippocampus

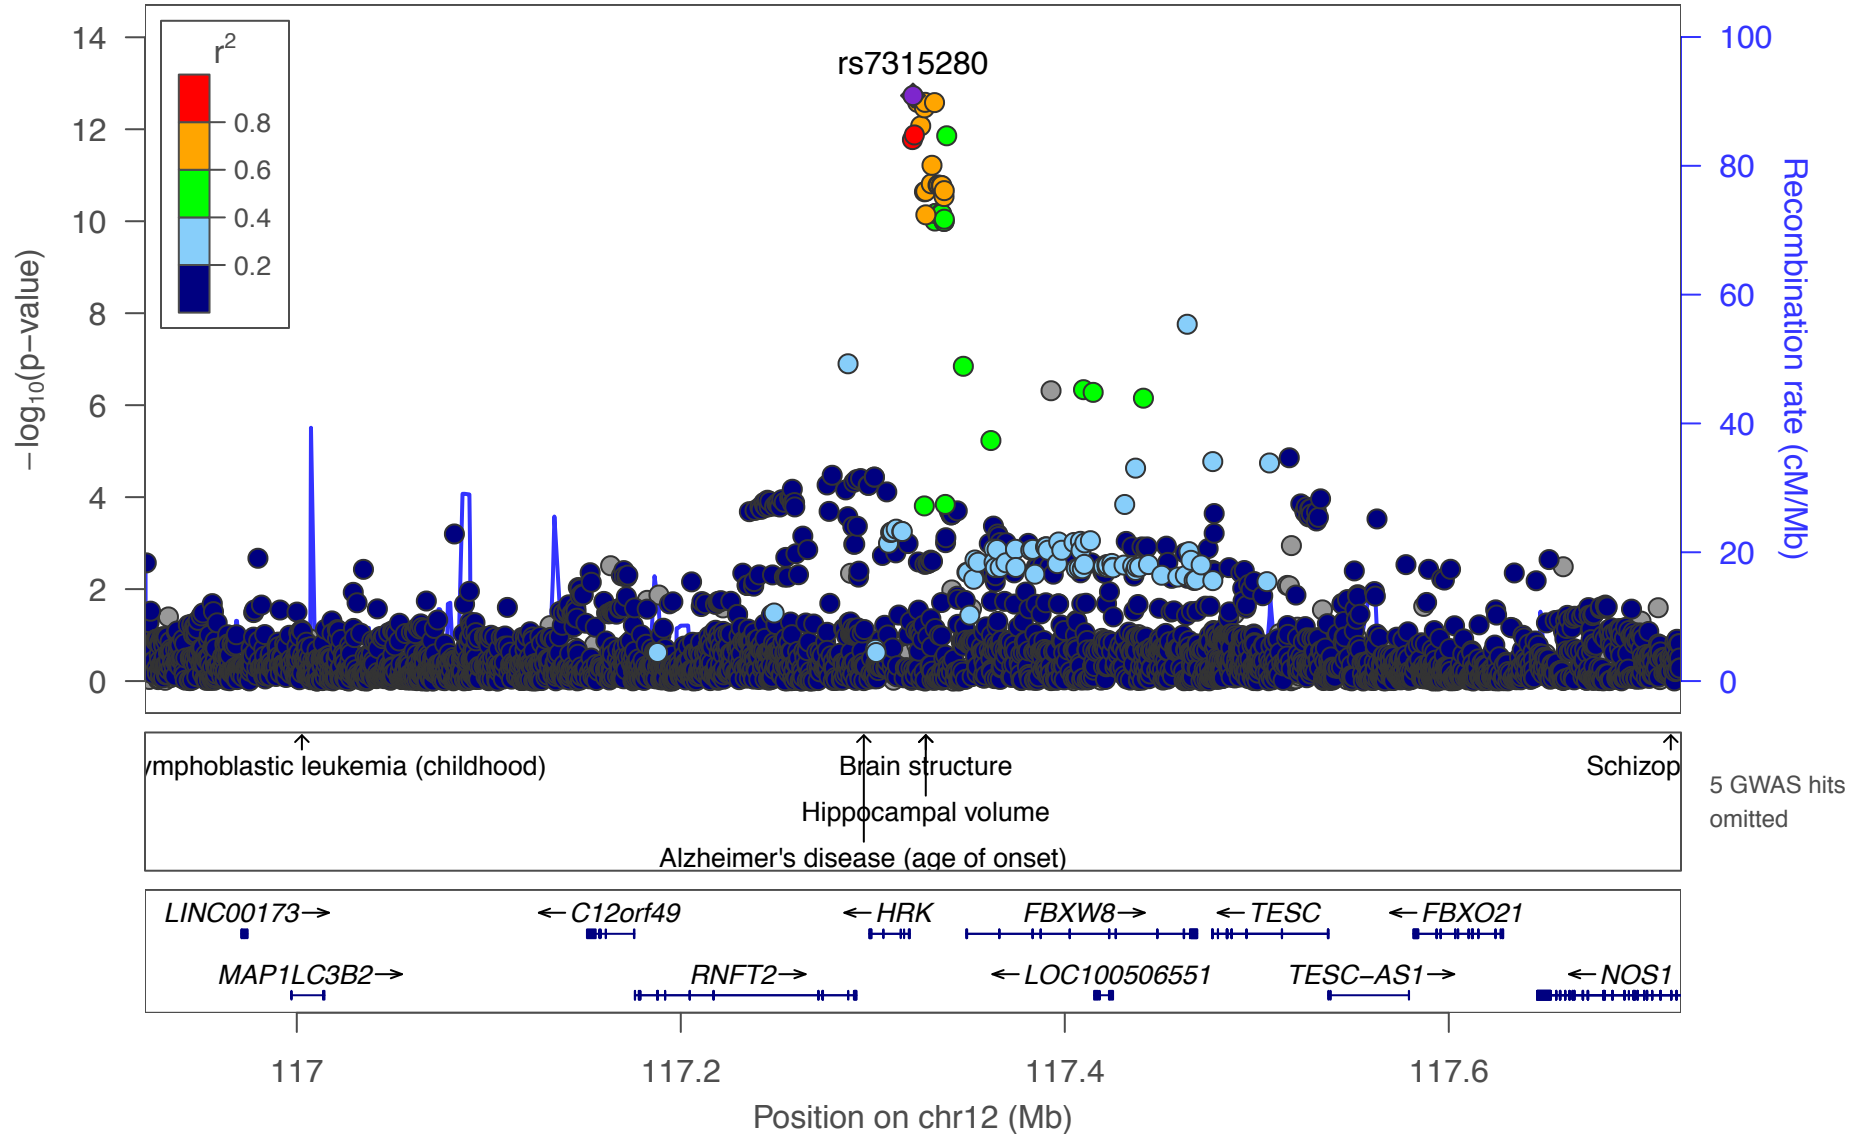

date: Thu Aug 17 18:58:48 2017

build: hg19

display range: chr12:116920938–117720938 [116920938–117720938]

hilite range: 0 – 0 [ 0 – 0 ]

reference SNP: chr12:117320938

number of SNPs plotted: 3873

min P.value: 1.85E–13 [chr12:117320938]

max P.value: 10E–1 [chr12:117036380]

omitted GWAS Hits: NA, NA

omitted GWAS Hits: NA, NA

## GWAS Catalog SNPs in Region

| <b>chr</b> | <b>pos (Mb)</b> | <b>trait</b>                                                | <b>snp</b> |
|------------|-----------------|-------------------------------------------------------------|------------|
| 12         | 117.0027        | Acute lymphoblastic leukemia (childhood)                    | rs2089222  |
| 12         | 117.1543        | Diisocyanate-induced asthma                                 | rs2279695  |
| 12         | 117.1994        | Obesity-related traits                                      | rs12322695 |
| 12         | 117.2953        | Alzheimer's disease (age of onset)                          | rs17429217 |
| 12         | 117.3234        | Subcortical brain region volumes                            | rs77956314 |
| 12         | 117.3276        | Brain structure                                             | rs7294919  |
| 12         | 117.3276        | Hippocampal volume                                          | rs7294919  |
| 12         | 117.3276        | Subcortical brain region volumes                            | rs7294919  |
| 12         | 117.5106        | Pre-treatment pain in head and neck squamous cell carcinoma | rs11068315 |
| 12         | 117.7156        | Schizophrenia                                               | rs2293052  |

# FAST\_ROIs\_R\_hippocampus

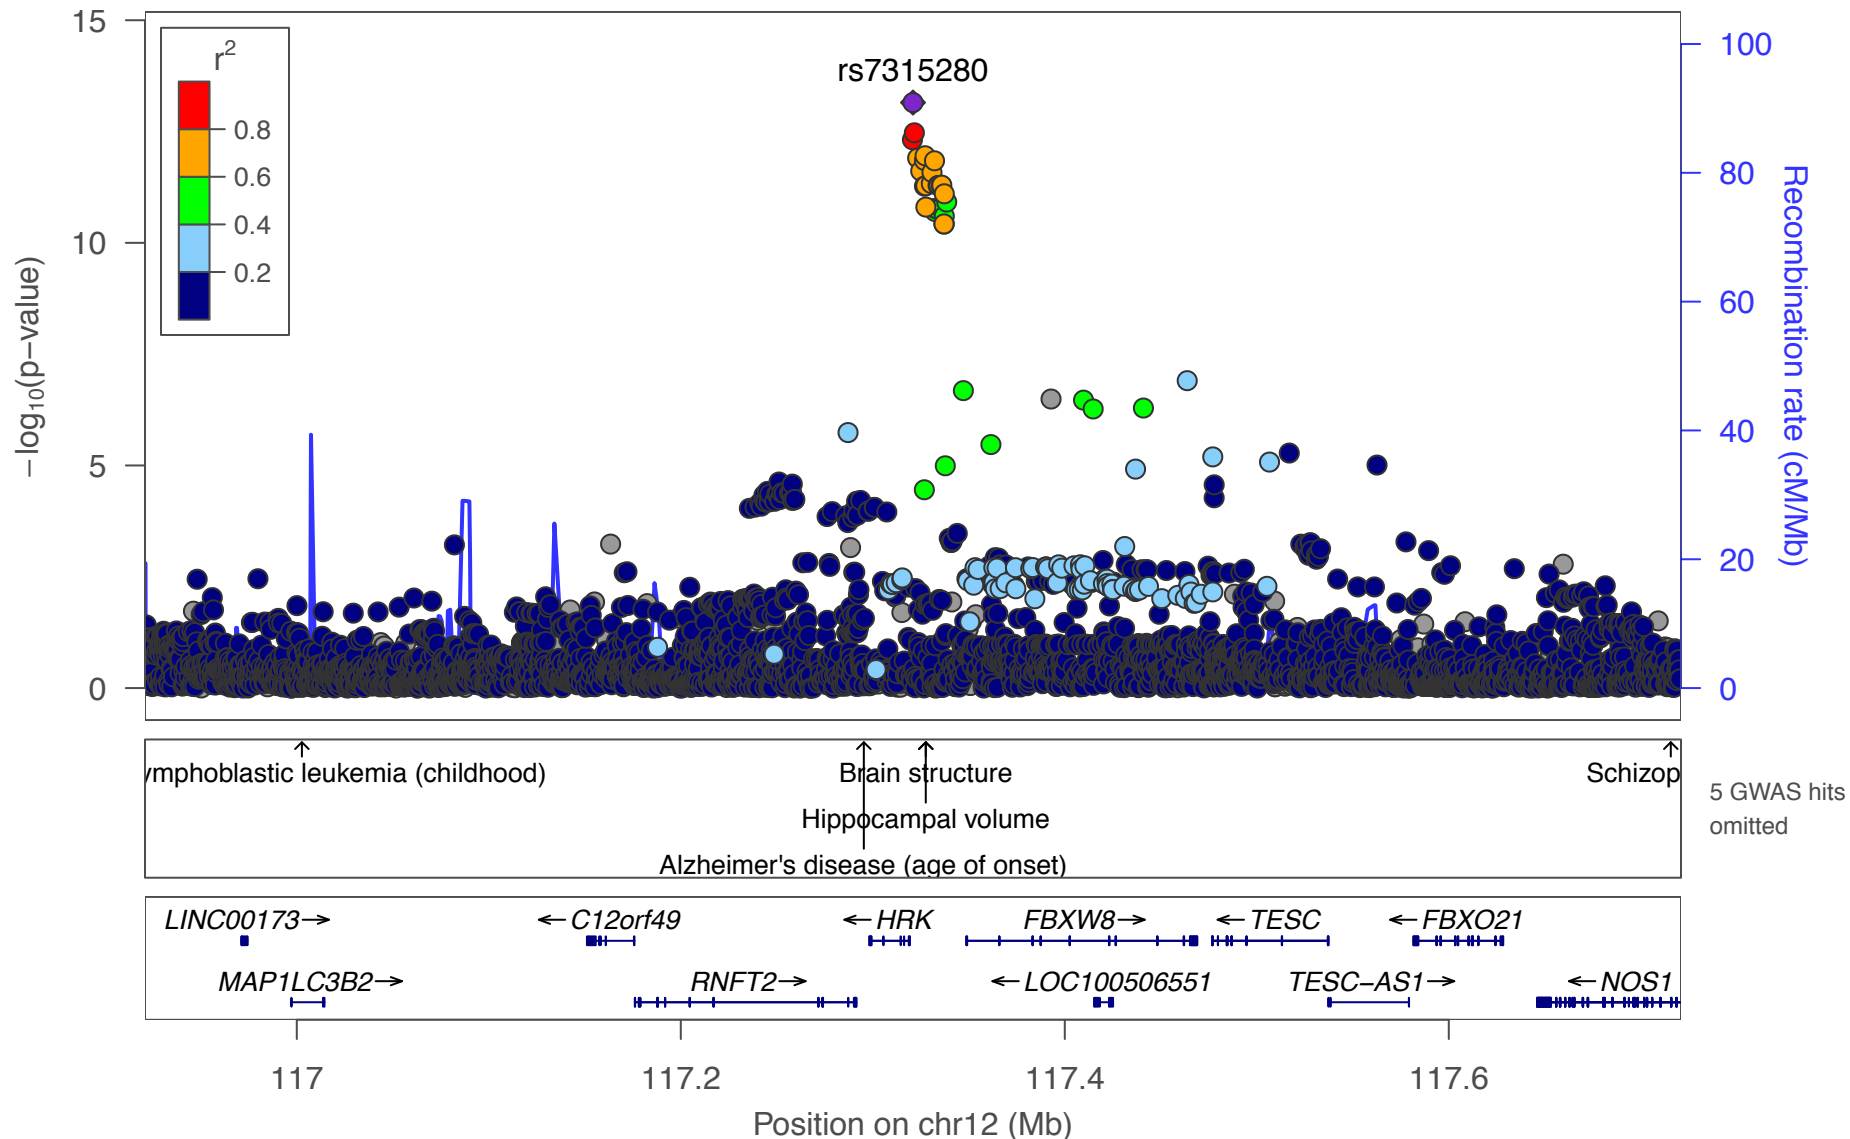



date: Thu Aug 17 18:52:17 2017

build: hg19

display range: chr12:116920938–117720938 [116920938–117720938]

hilite range: 0 – 0 [ 0 – 0 ]

reference SNP: chr12:117320938

number of SNPs plotted: 3873

min P.value: 7.06E–14 [chr12:117320938]

max P.value: 9.99E–1 [chr12:117185788]

omitted GWAS Hits: NA, NA

omitted GWAS Hits: NA, NA

## GWAS Catalog SNPs in Region

| <b>chr</b> | <b>pos (Mb)</b> | <b>trait</b>                                                | <b>snp</b> |
|------------|-----------------|-------------------------------------------------------------|------------|
| 12         | 117.0027        | Acute lymphoblastic leukemia (childhood)                    | rs2089222  |
| 12         | 117.1543        | Diisocyanate-induced asthma                                 | rs2279695  |
| 12         | 117.1994        | Obesity-related traits                                      | rs12322695 |
| 12         | 117.2953        | Alzheimer's disease (age of onset)                          | rs17429217 |
| 12         | 117.3234        | Subcortical brain region volumes                            | rs77956314 |
| 12         | 117.3276        | Brain structure                                             | rs7294919  |
| 12         | 117.3276        | Hippocampal volume                                          | rs7294919  |
| 12         | 117.3276        | Subcortical brain region volumes                            | rs7294919  |
| 12         | 117.5106        | Pre-treatment pain in head and neck squamous cell carcinoma | rs11068315 |
| 12         | 117.7156        | Schizophrenia                                               | rs2293052  |

# FIRST\_right\_putamen\_volume

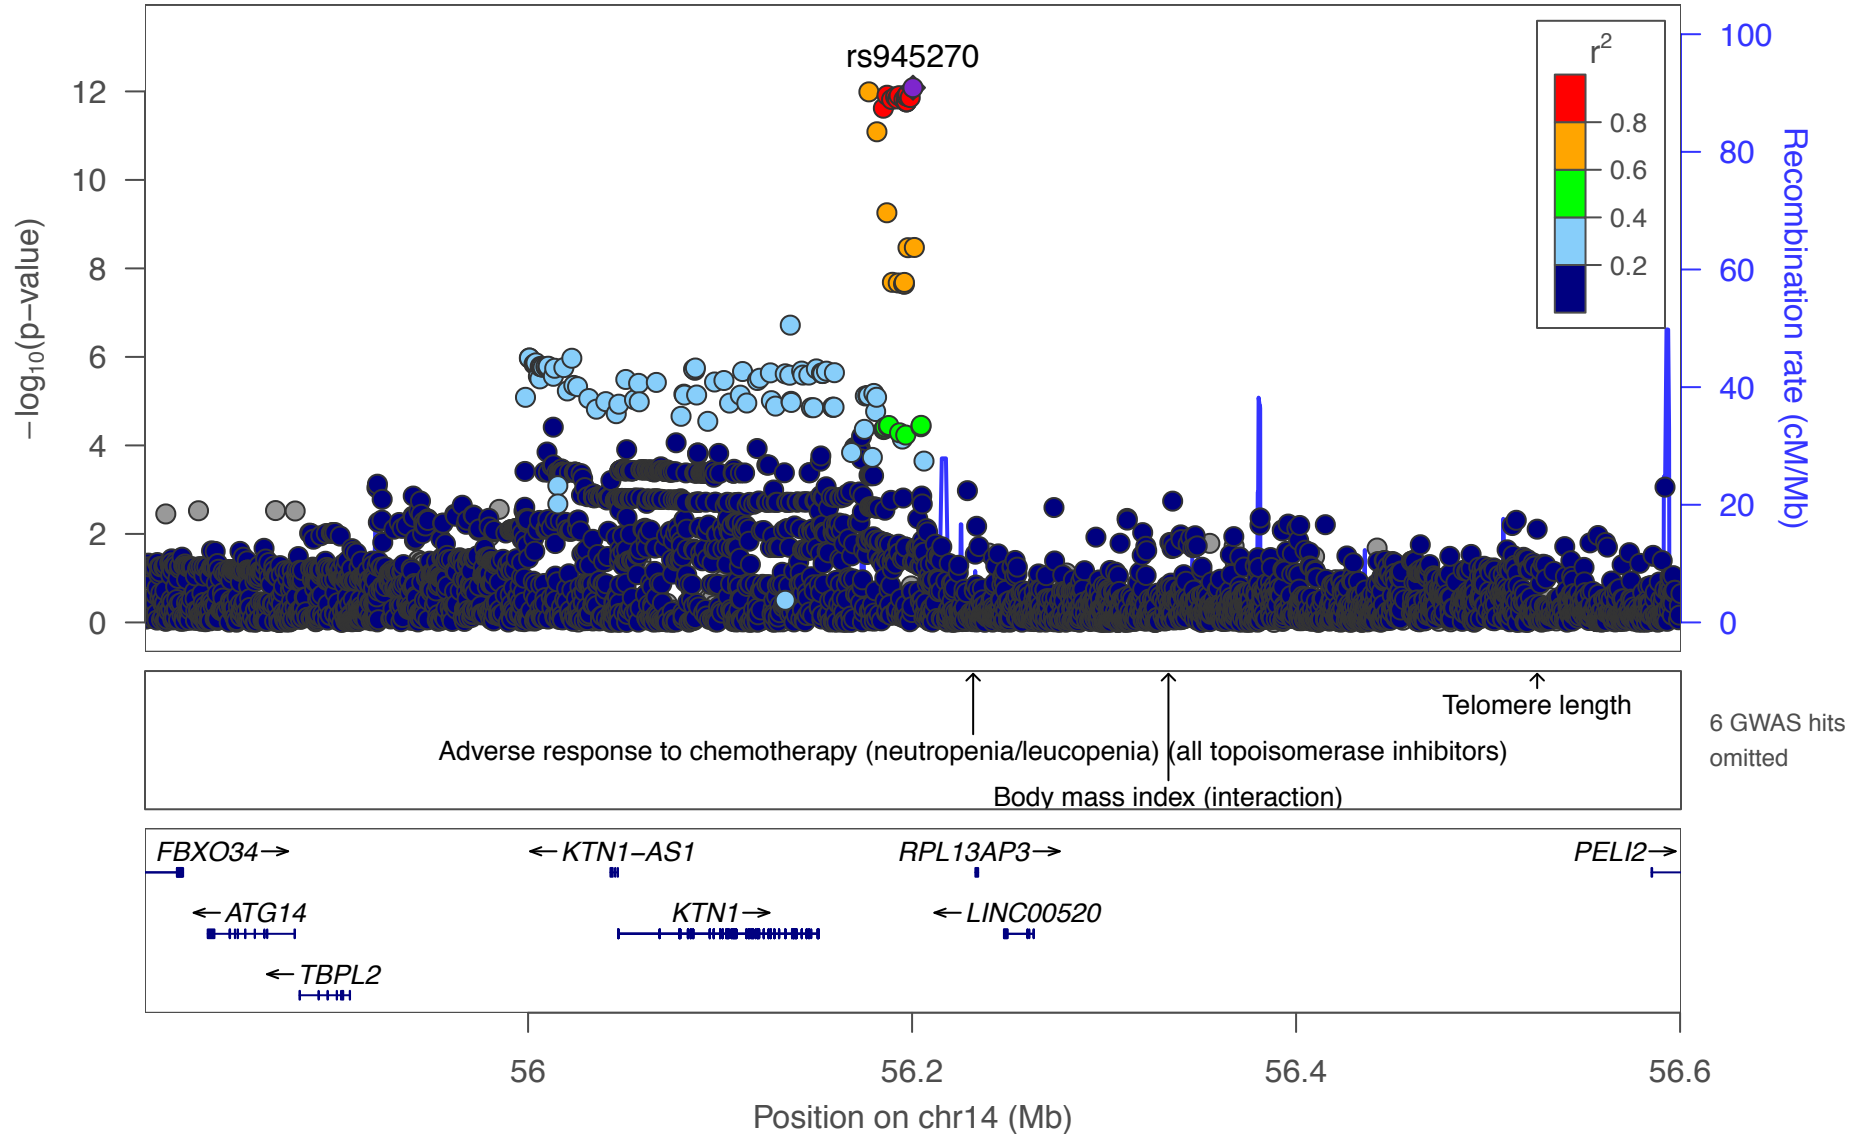

date: Thu Aug 17 19:08:40 2017

build: hg19

display range: chr14:55800473–56600473 [55800473–56600473]

hilite range: 0 – 0 [ 0 – 0 ]

reference SNP: chr14:56200473

number of SNPs plotted: 4468

min P.value: 8.24E–13 [chr14:56200473]

max P.value: 10E–1 [chr14:55902967]

omitted GWAS Hits: NA, NA

omitted GWAS Hits: NA, NA

GWAS Catalog SNPs in Region

| chr | pos (Mb) | trait                                                                                    | snp        |
|-----|----------|------------------------------------------------------------------------------------------|------------|
| 14  | 56.20047 | Subcortical brain region volumes                                                         | rs945270   |
| 14  | 56.23180 | Adverse response to chemotherapy (neutropenia/leucopenia) (all topoisomerase inhibitors) | rs7494275  |
| 14  | 56.25340 | Parental extreme longevity (95 years and older)                                          | rs12898084 |
| 14  | 56.33351 | Body mass index (interaction)                                                            | rs7350721  |
| 14  | 56.35692 | Post bronchodilator FEV1/FVC ratio                                                       | rs73276024 |
| 14  | 56.36174 | Dementia and core Alzheimer's disease neuropathologic changes                            | rs35862341 |
| 14  | 56.39311 | Height                                                                                   | rs4898878  |
| 14  | 56.41812 | Obesity-related traits                                                                   | rs10151037 |
| 14  | 56.52557 | Telomere length                                                                          | rs398652   |

# FIRST\_left\_putamen\_volume\_plus\_FIRST\_right\_putamen\_volume

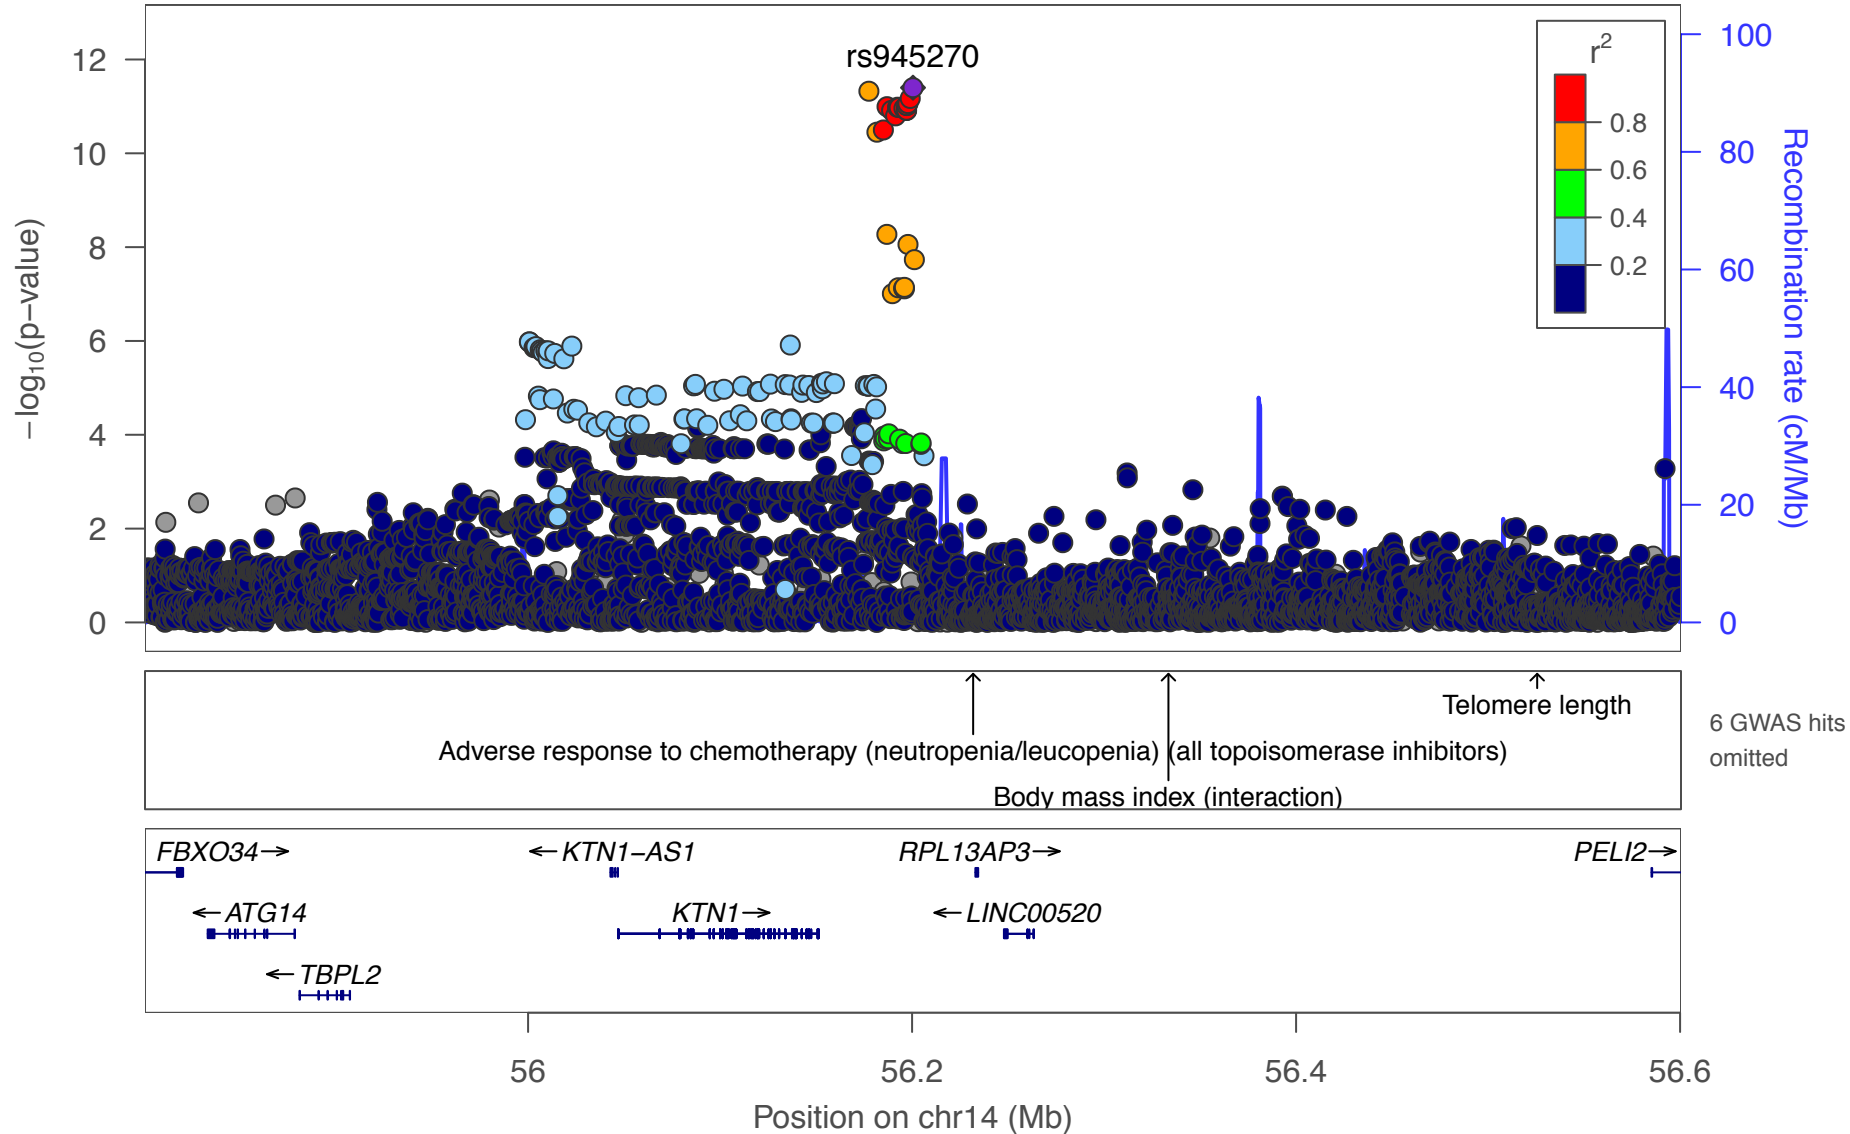

date: Thu Aug 17 19:08:40 2017

build: hg19

display range: chr14:55800473–56600473 [55800473–56600473]

hilite range: 0 – 0 [ 0 – 0 ]

reference SNP: chr14:56200473

number of SNPs plotted: 4468

min P.value: 3.99E–12 [chr14:56200473]

max P.value: 9.99E–1 [chr14:56286466]

omitted GWAS Hits: NA, NA

omitted GWAS Hits: NA, NA

## GWAS Catalog SNPs in Region

| <b>chr</b> | <b>pos (Mb)</b> | <b>trait</b>                                                                             | <b>snp</b> |
|------------|-----------------|------------------------------------------------------------------------------------------|------------|
| 14         | 56.20047        | Subcortical brain region volumes                                                         | rs945270   |
| 14         | 56.23180        | Adverse response to chemotherapy (neutropenia/leucopenia) (all topoisomerase inhibitors) | rs7494275  |
| 14         | 56.25340        | Parental extreme longevity (95 years and older)                                          | rs12898084 |
| 14         | 56.33351        | Body mass index (interaction)                                                            | rs7350721  |
| 14         | 56.35692        | Post bronchodilator FEV1/FVC ratio                                                       | rs73276024 |
| 14         | 56.36174        | Dementia and core Alzheimer's disease neuropathologic changes                            | rs35862341 |
| 14         | 56.39311        | Height                                                                                   | rs4898878  |
| 14         | 56.41812        | Obesity-related traits                                                                   | rs10151037 |
| 14         | 56.52557        | Telomere length                                                                          | rs398652   |



# volume\_Left-Putamen

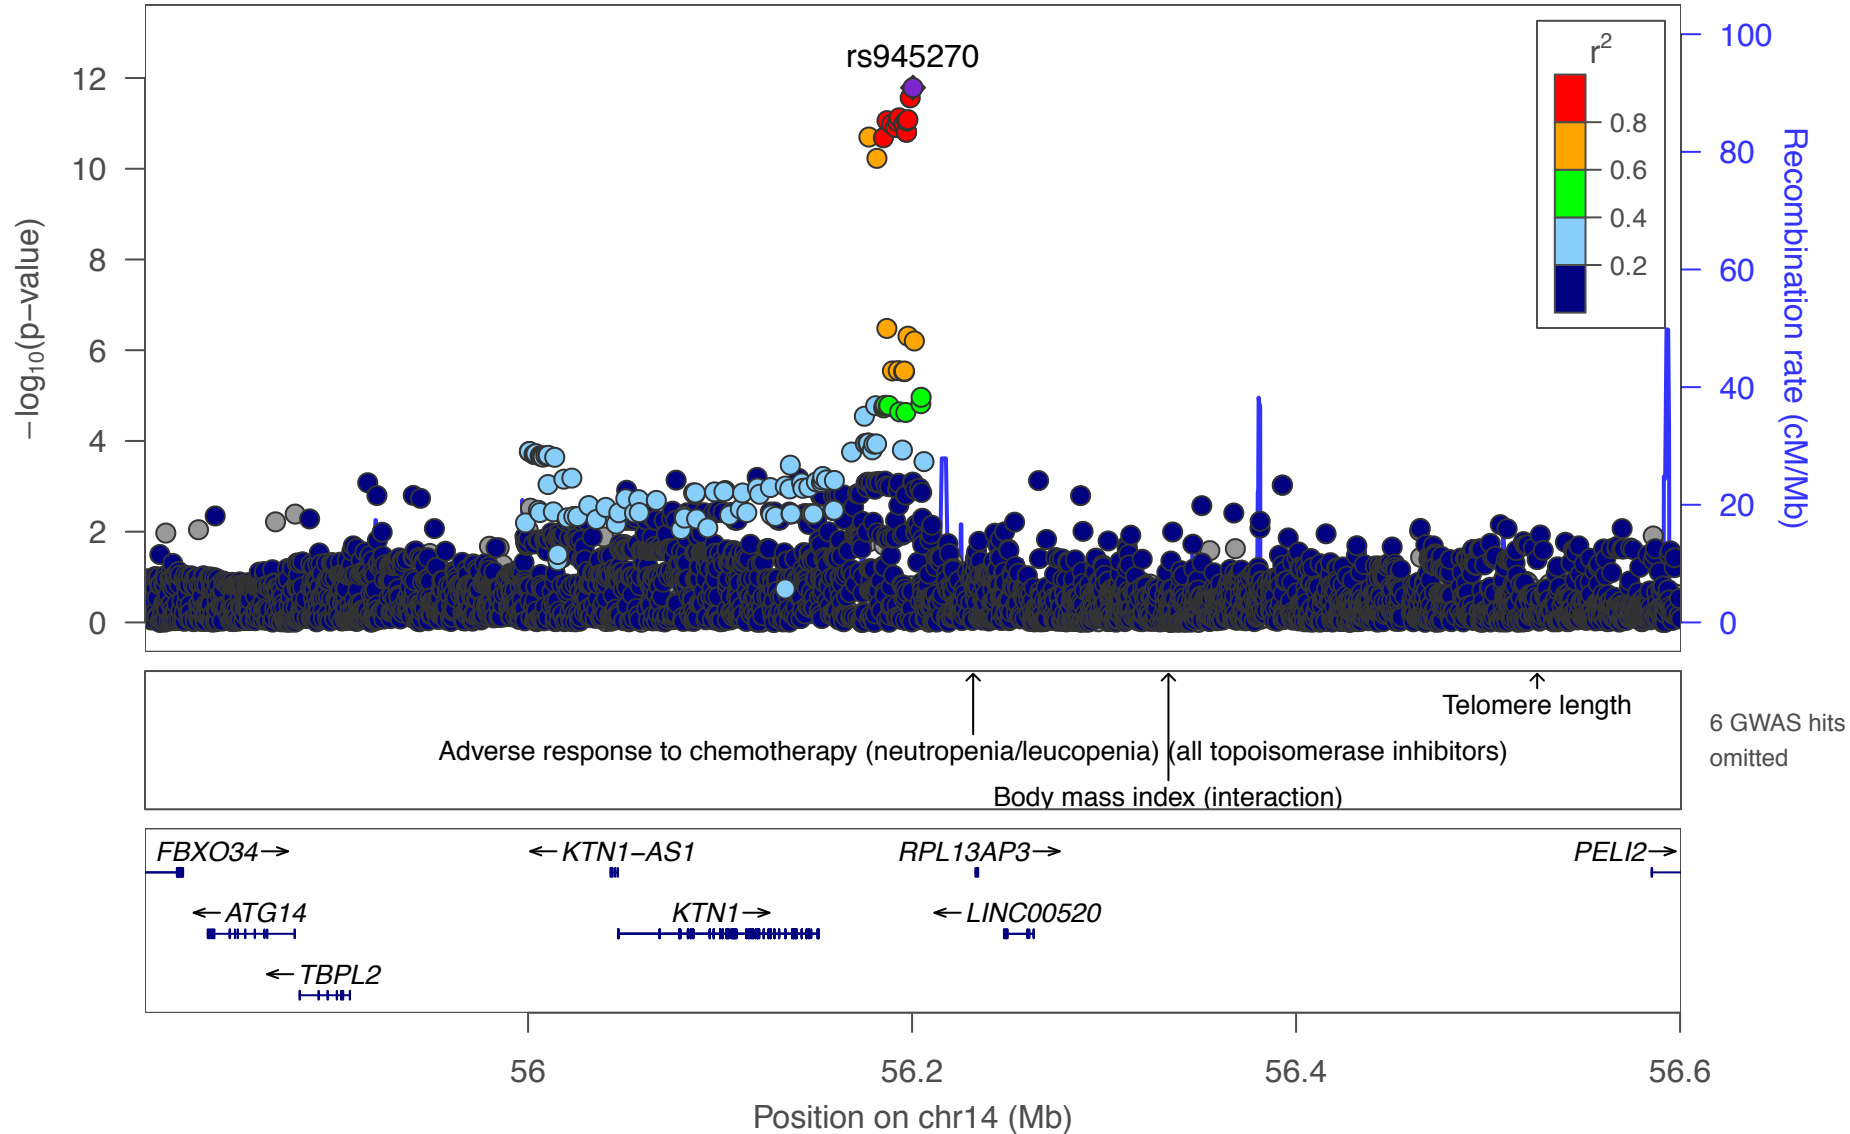

date: Thu Aug 17 19:09:55 2017

build: hg19

display range: chr14:55800473–56600473 [55800473–56600473]

hilite range: 0 – 0 [ 0 – 0 ]

reference SNP: chr14:56200473

number of SNPs plotted: 4468

min P.value: 1.63E–12 [chr14:56200473]

max P.value: 10E–1 [chr14:55808282]

omitted GWAS Hits: NA, NA

omitted GWAS Hits: NA, NA

GWAS Catalog SNPs in Region

| chr | pos (Mb) | trait                                                                                    | snp        |
|-----|----------|------------------------------------------------------------------------------------------|------------|
| 14  | 56.20047 | Subcortical brain region volumes                                                         | rs945270   |
| 14  | 56.23180 | Adverse response to chemotherapy (neutropenia/leucopenia) (all topoisomerase inhibitors) | rs7494275  |
| 14  | 56.25340 | Parental extreme longevity (95 years and older)                                          | rs12898084 |
| 14  | 56.33351 | Body mass index (interaction)                                                            | rs7350721  |
| 14  | 56.35692 | Post bronchodilator FEV1/FVC ratio                                                       | rs73276024 |
| 14  | 56.36174 | Dementia and core Alzheimer's disease neuropathologic changes                            | rs35862341 |
| 14  | 56.39311 | Height                                                                                   | rs4898878  |
| 14  | 56.41812 | Obesity-related traits                                                                   | rs10151037 |
| 14  | 56.52557 | Telomere length                                                                          | rs398652   |

# volume\_Right-Putamen

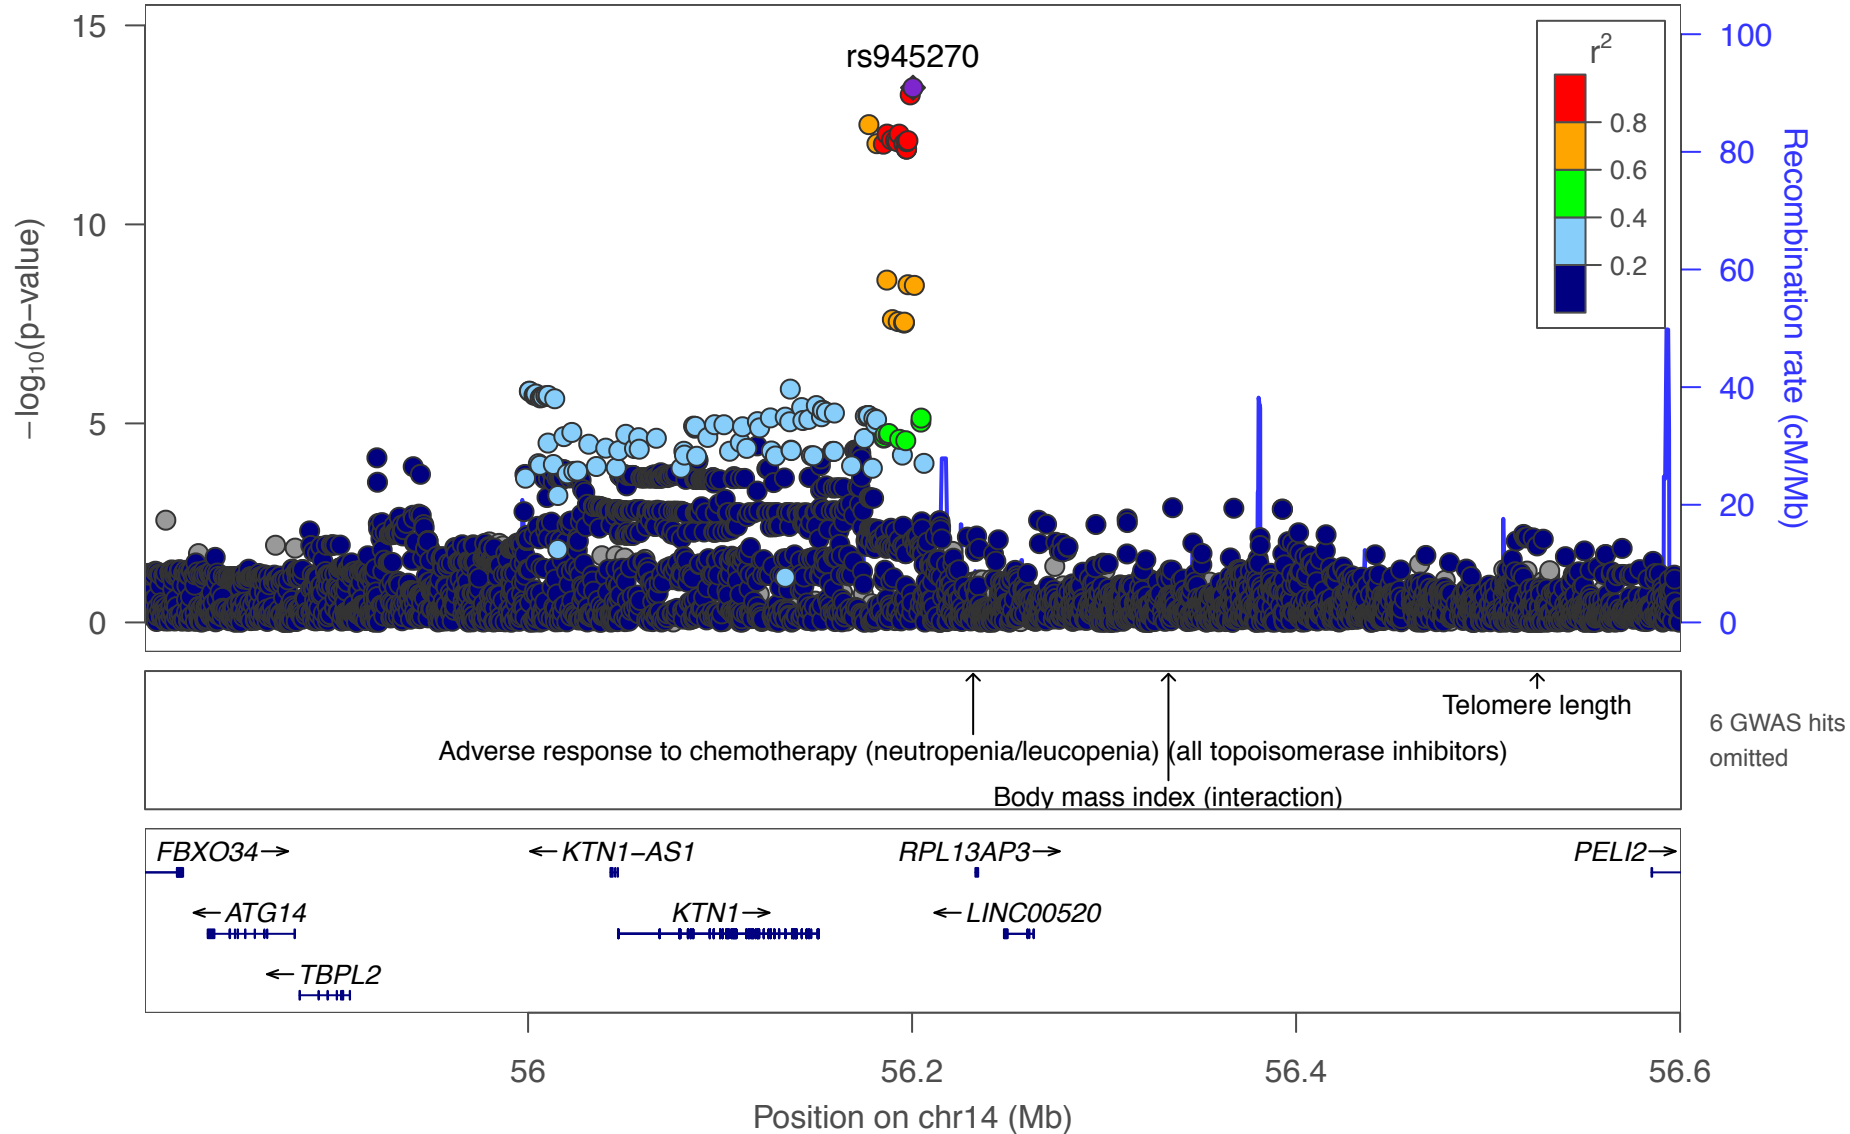

date: Thu Aug 17 19:14:48 2017

build: hg19

display range: chr14:55800473–56600473 [55800473–56600473]

hilite range: 0 – 0 [ 0 – 0 ]

reference SNP: chr14:56200473

number of SNPs plotted: 4468

min P.value: 3.67E–14 [chr14:56200473]

max P.value: 10E–1 [chr14:56527105]

omitted GWAS Hits: NA, NA

omitted GWAS Hits: NA, NA

GWAS Catalog SNPs in Region

| chr | pos (Mb) | trait                                                                                    | snp        |
|-----|----------|------------------------------------------------------------------------------------------|------------|
| 14  | 56.20047 | Subcortical brain region volumes                                                         | rs945270   |
| 14  | 56.23180 | Adverse response to chemotherapy (neutropenia/leucopenia) (all topoisomerase inhibitors) | rs7494275  |
| 14  | 56.25340 | Parental extreme longevity (95 years and older)                                          | rs12898084 |
| 14  | 56.33351 | Body mass index (interaction)                                                            | rs7350721  |
| 14  | 56.35692 | Post bronchodilator FEV1/FVC ratio                                                       | rs73276024 |
| 14  | 56.36174 | Dementia and core Alzheimer's disease neuropathologic changes                            | rs35862341 |
| 14  | 56.39311 | Height                                                                                   | rs4898878  |
| 14  | 56.41812 | Obesity-related traits                                                                   | rs10151037 |
| 14  | 56.52557 | Telomere length                                                                          | rs398652   |

# a2009s\_lh\_G\_precuneus\_area

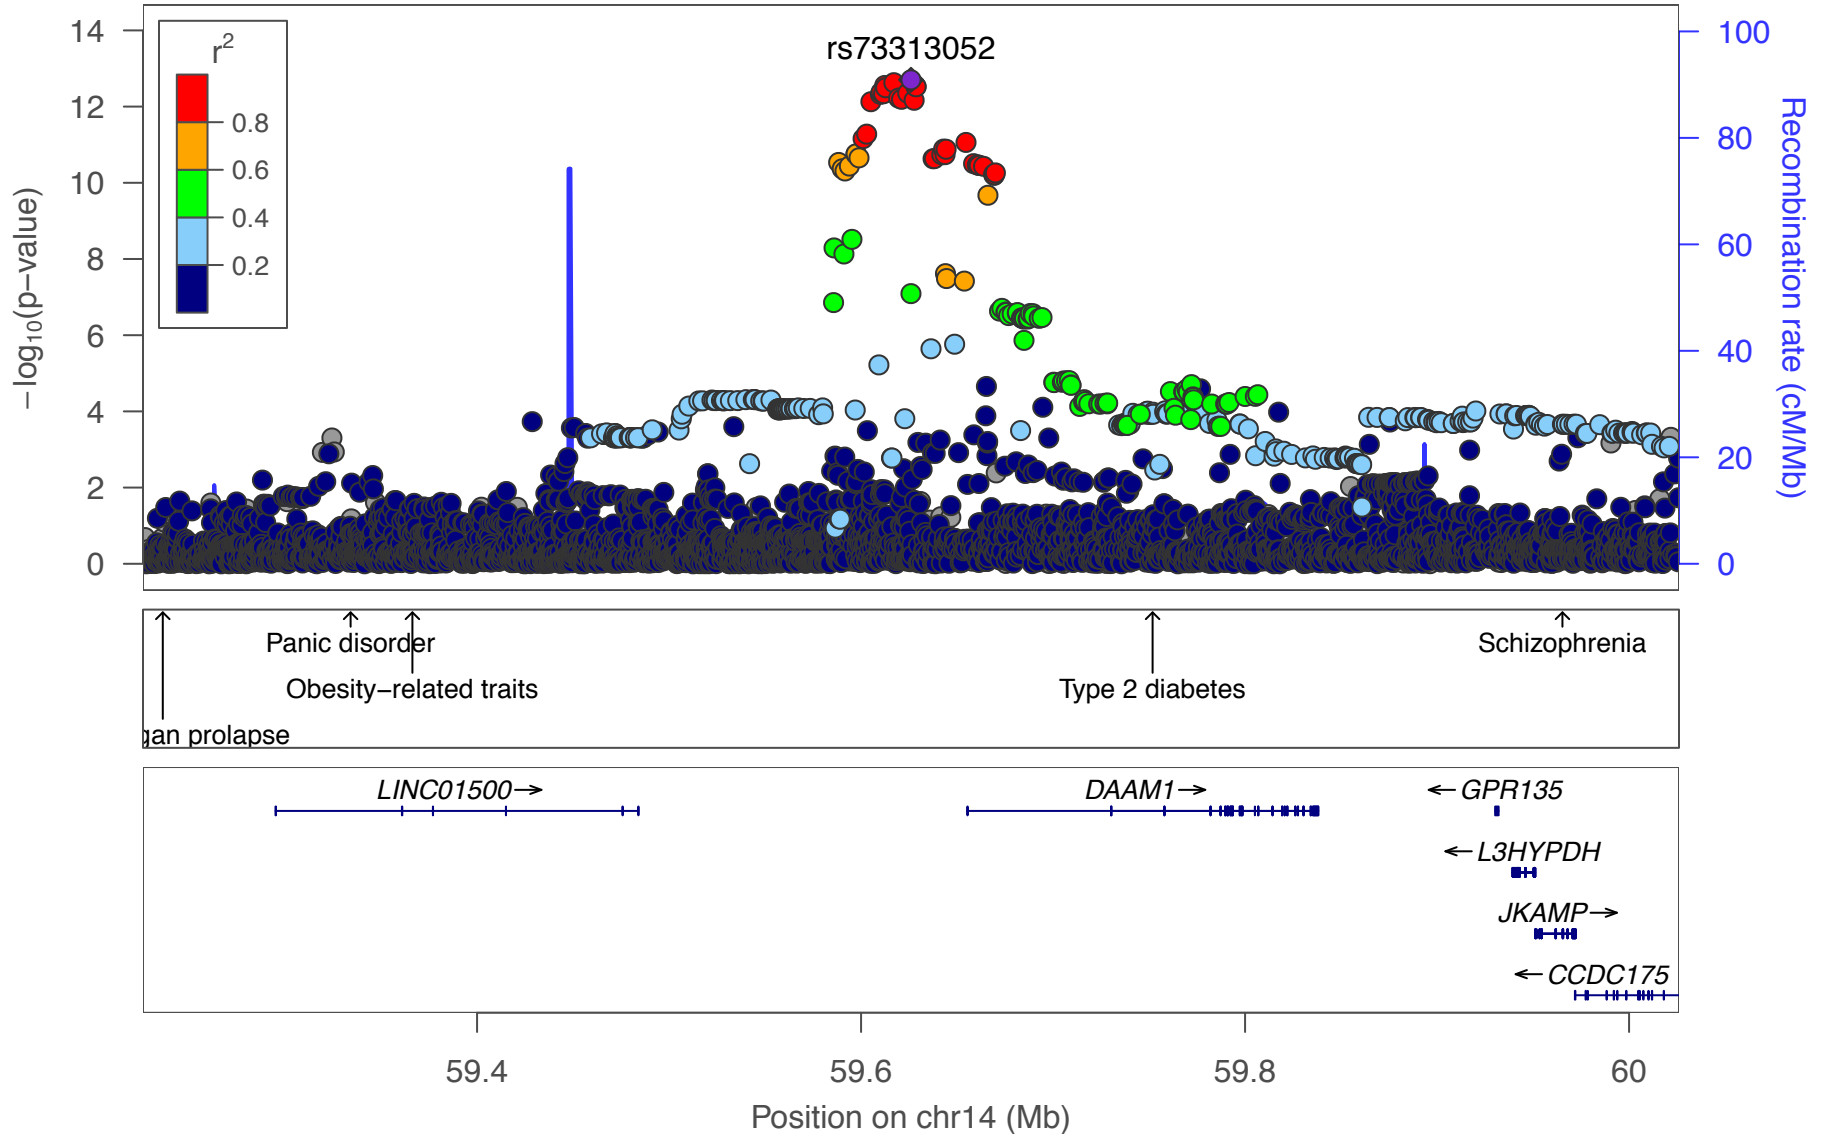

date: Thu Aug 17 19:03:55 2017

build: hg19

display range: chr14:59225997–60025997 [59225997–60025997]

hilite range: 0 – 0 [ 0 – 0 ]

reference SNP: chr14:59625997

number of SNPs plotted: 4164

min P.value: 1.98E–13 [chr14:59625997]

max P.value: 10E–1 [chr14:59512546]



## GWAS Catalog SNPs in Region

| <b>chr</b> | <b>pos (Mb)</b> | <b>trait</b>           | <b>snp</b>  |
|------------|-----------------|------------------------|-------------|
| 14         | 59.23631        | Pelvic organ prolapse  | rs7147087   |
| 14         | 59.33413        | Panic disorder         | rs4901869   |
| 14         | 59.36632        | Obesity-related traits | rs405460    |
| 14         | 59.75183        | Type 2 diabetes        | rs35209784  |
| 14         | 59.96529        | Schizophrenia          | rs111803315 |

# DKTAtlas\_lh\_cuneus\_area

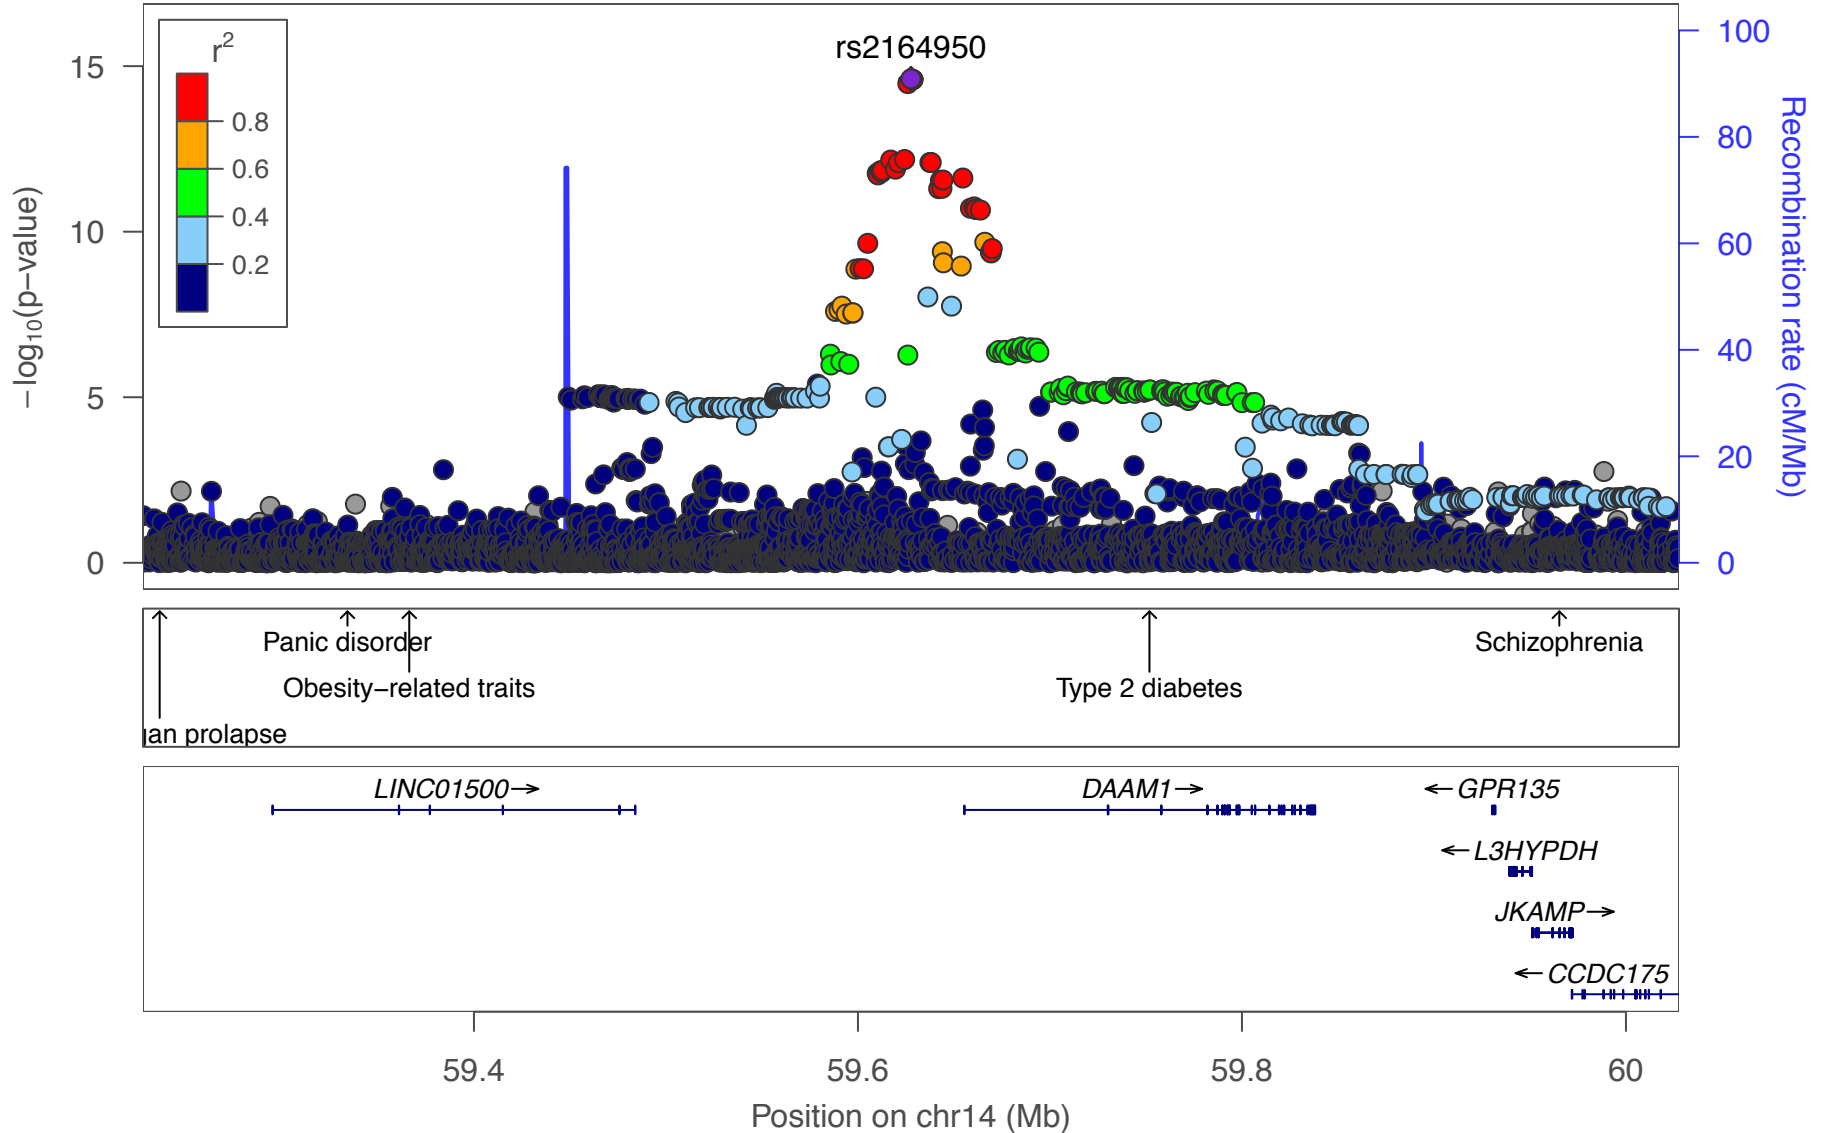

date: Thu Aug 17 19:08:58 2017

build: hg19

display range: chr14:59227631–60027631 [59227631–60027631]

hilite range: 0 – 0 [ 0 – 0 ]

reference SNP: chr14:59627631

number of SNPs plotted: 4163

min P.value: 2.42E–15 [chr14:59627631]

max P.value: 10E–1 [chr14:59700041]

## GWAS Catalog SNPs in Region

| <b>chr</b> | <b>pos (Mb)</b> | <b>trait</b>           | <b>snp</b>  |
|------------|-----------------|------------------------|-------------|
| 14         | 59.23631        | Pelvic organ prolapse  | rs7147087   |
| 14         | 59.33413        | Panic disorder         | rs4901869   |
| 14         | 59.36632        | Obesity-related traits | rs405460    |
| 14         | 59.75183        | Type 2 diabetes        | rs35209784  |
| 14         | 59.96529        | Schizophrenia          | rs111803315 |

# FAST\_ROIs\_L\_intracalc\_cortex

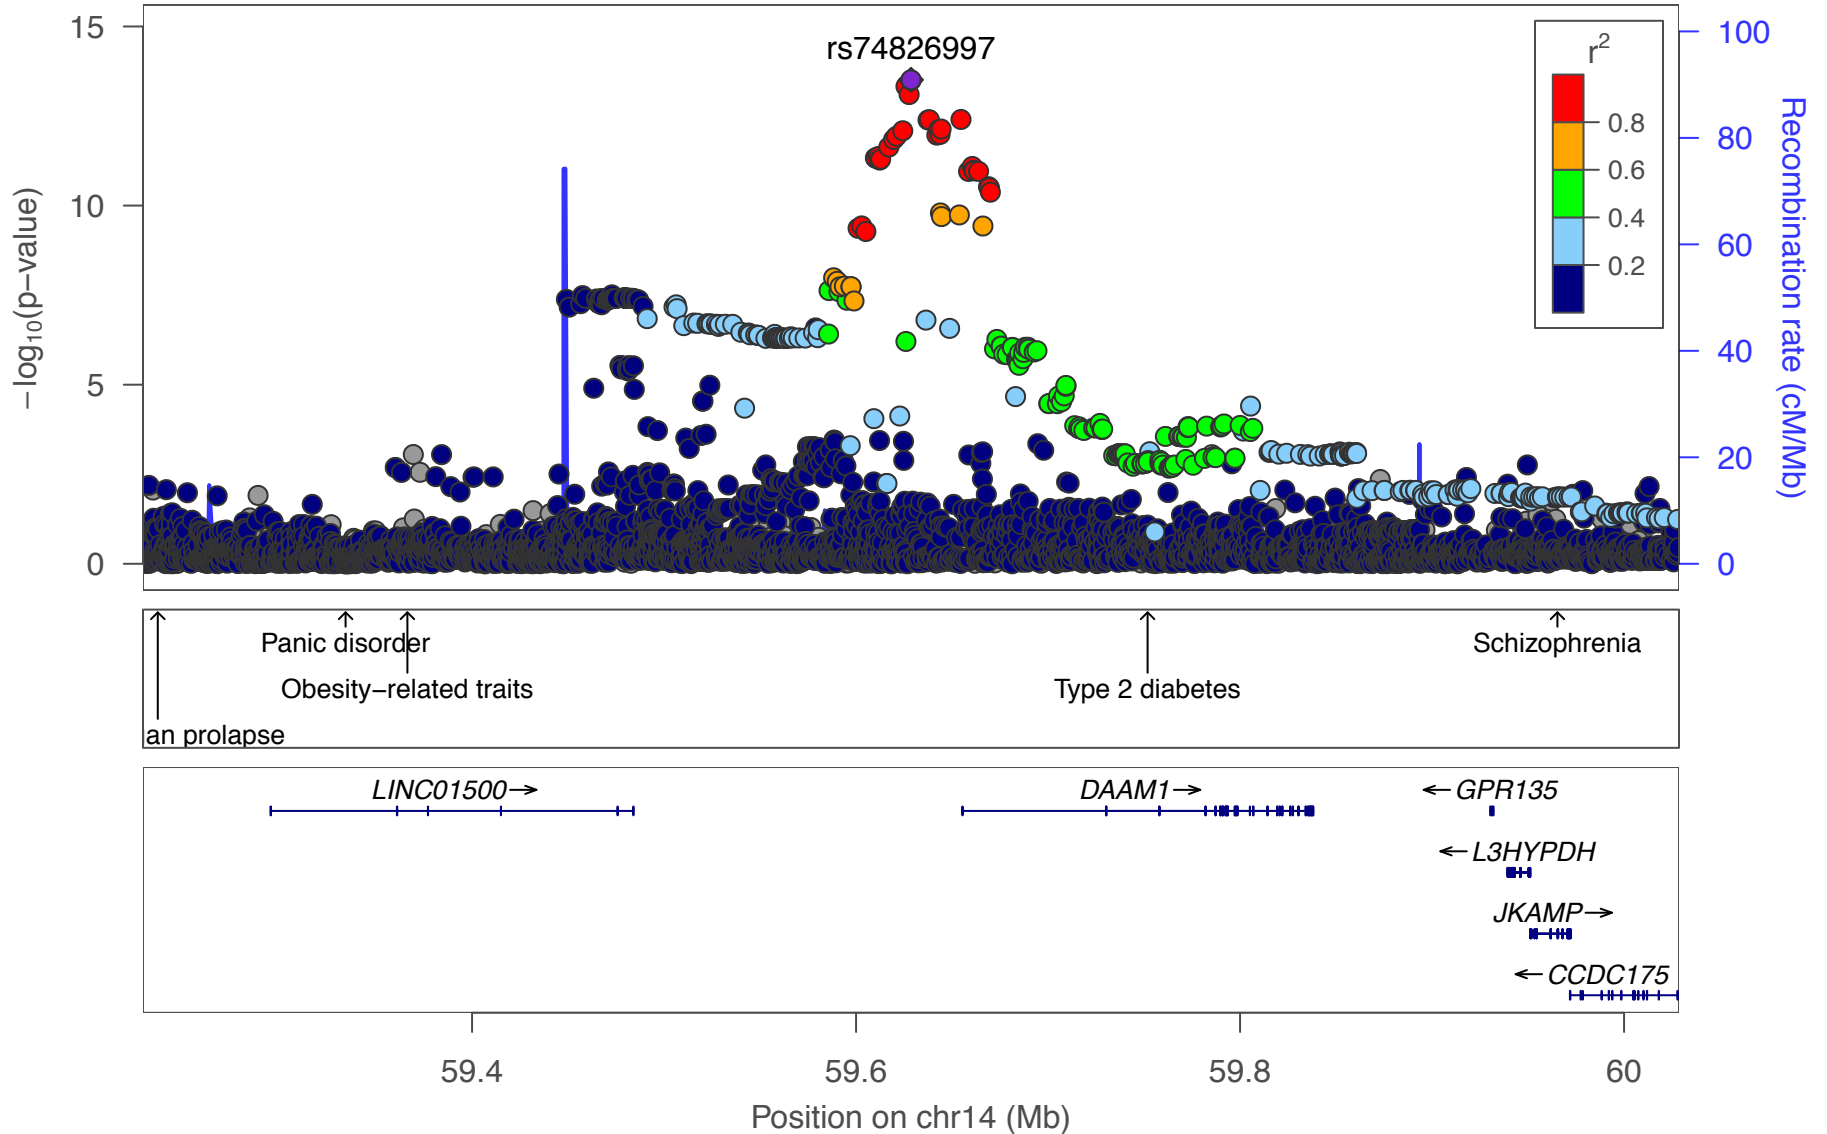

date: Thu Aug 17 18:46:28 2017

build: hg19

display range: chr14:59228609–60028609 [59228609–60028609]

hilite range: 0 – 0 [ 0 – 0 ]

reference SNP: chr14:59628609

number of SNPs plotted: 4162

min P.value: 3.08E–14 [chr14:59628609]

max P.value: 10E–1 [chr14:59334863]

## GWAS Catalog SNPs in Region

| <b>chr</b> | <b>pos (Mb)</b> | <b>trait</b>           | <b>snp</b>  |
|------------|-----------------|------------------------|-------------|
| 14         | 59.23631        | Pelvic organ prolapse  | rs7147087   |
| 14         | 59.33413        | Panic disorder         | rs4901869   |
| 14         | 59.36632        | Obesity-related traits | rs405460    |
| 14         | 59.75183        | Type 2 diabetes        | rs35209784  |
| 14         | 59.96529        | Schizophrenia          | rs111803315 |

# FAST\_ROIs\_R\_intracalc\_cortex

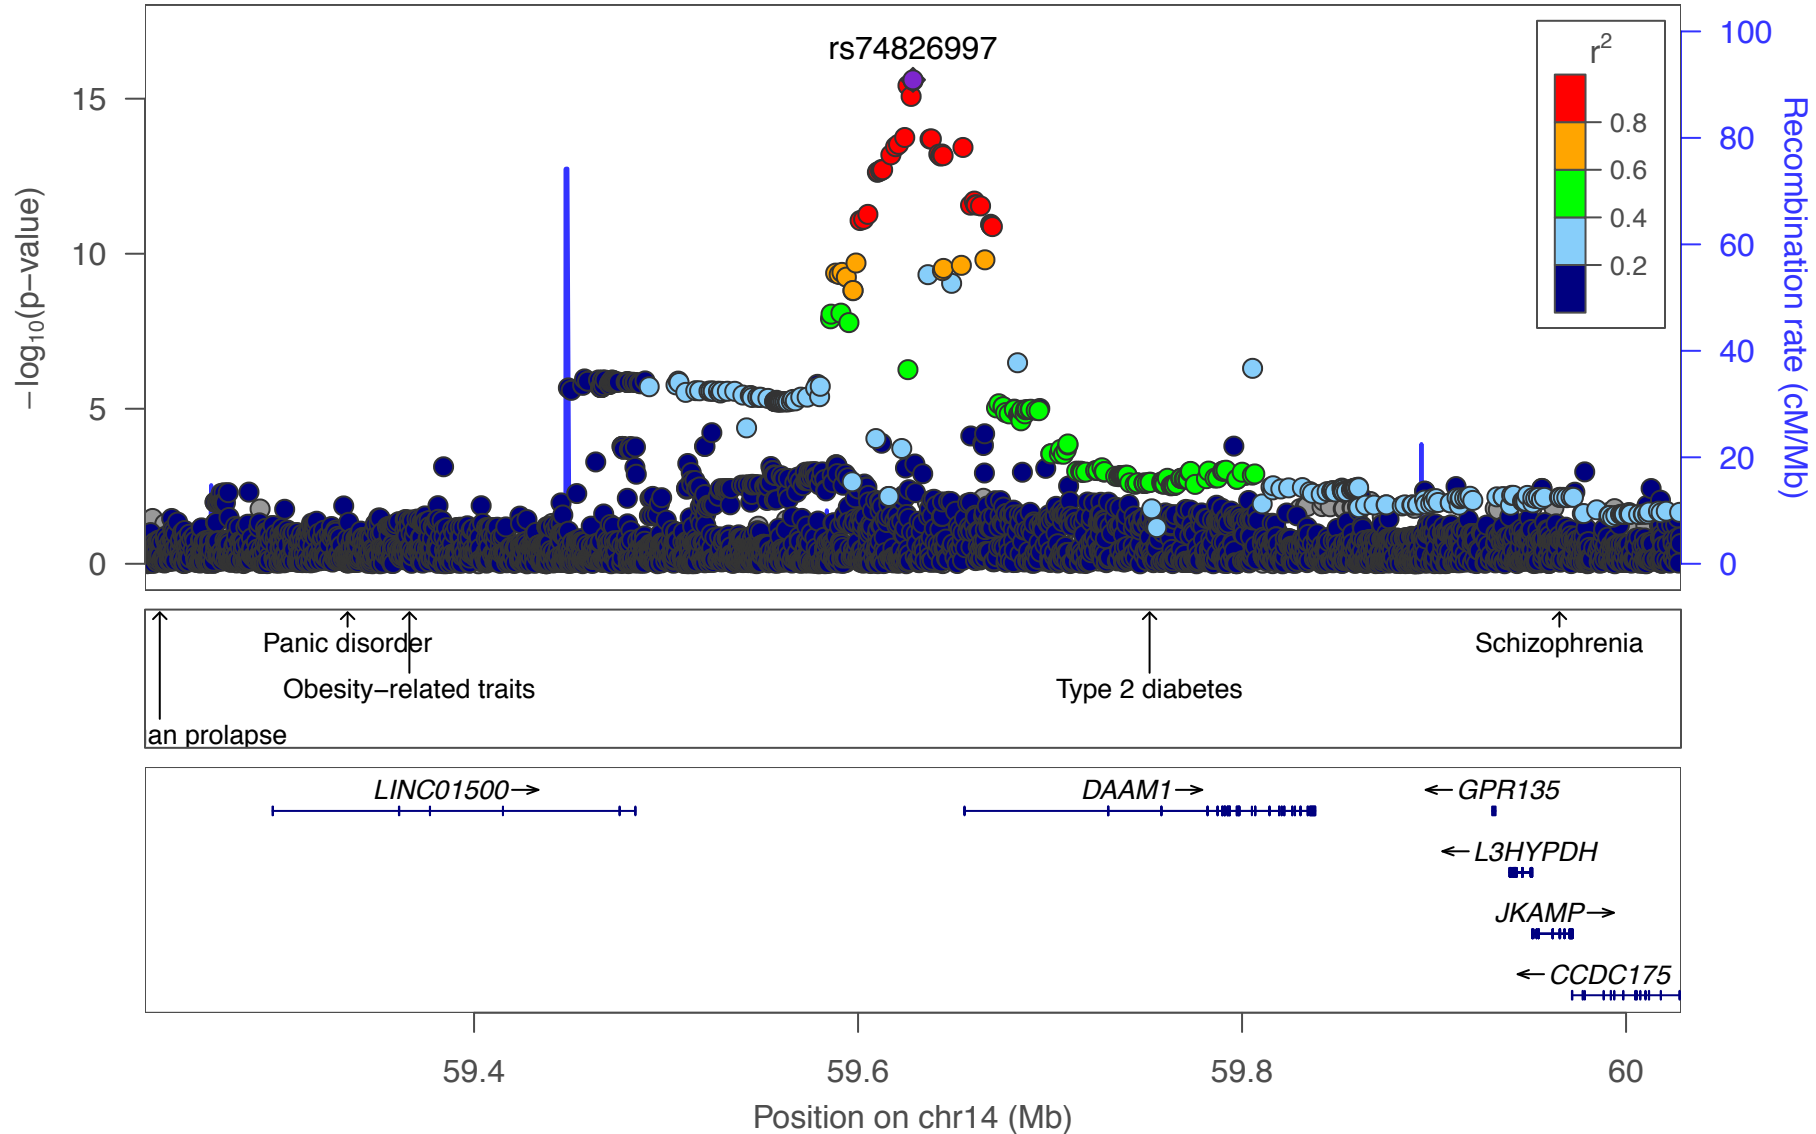



date: Thu Aug 17 18:46:27 2017

build: hg19

display range: chr14:59228609–60028609 [59228609–60028609]

hilite range: 0 – 0 [ 0 – 0 ]

reference SNP: chr14:59628609

number of SNPs plotted: 4162

min P.value: 2.46E–16 [chr14:59628609]

max P.value: 10E–1 [chr14:59746864]

## GWAS Catalog SNPs in Region

| <b>chr</b> | <b>pos (Mb)</b> | <b>trait</b>           | <b>snp</b>  |
|------------|-----------------|------------------------|-------------|
| 14         | 59.23631        | Pelvic organ prolapse  | rs7147087   |
| 14         | 59.33413        | Panic disorder         | rs4901869   |
| 14         | 59.36632        | Obesity-related traits | rs405460    |
| 14         | 59.75183        | Type 2 diabetes        | rs35209784  |
| 14         | 59.96529        | Schizophrenia          | rs111803315 |

# DKAtlas\_lh\_pericalcarine\_area

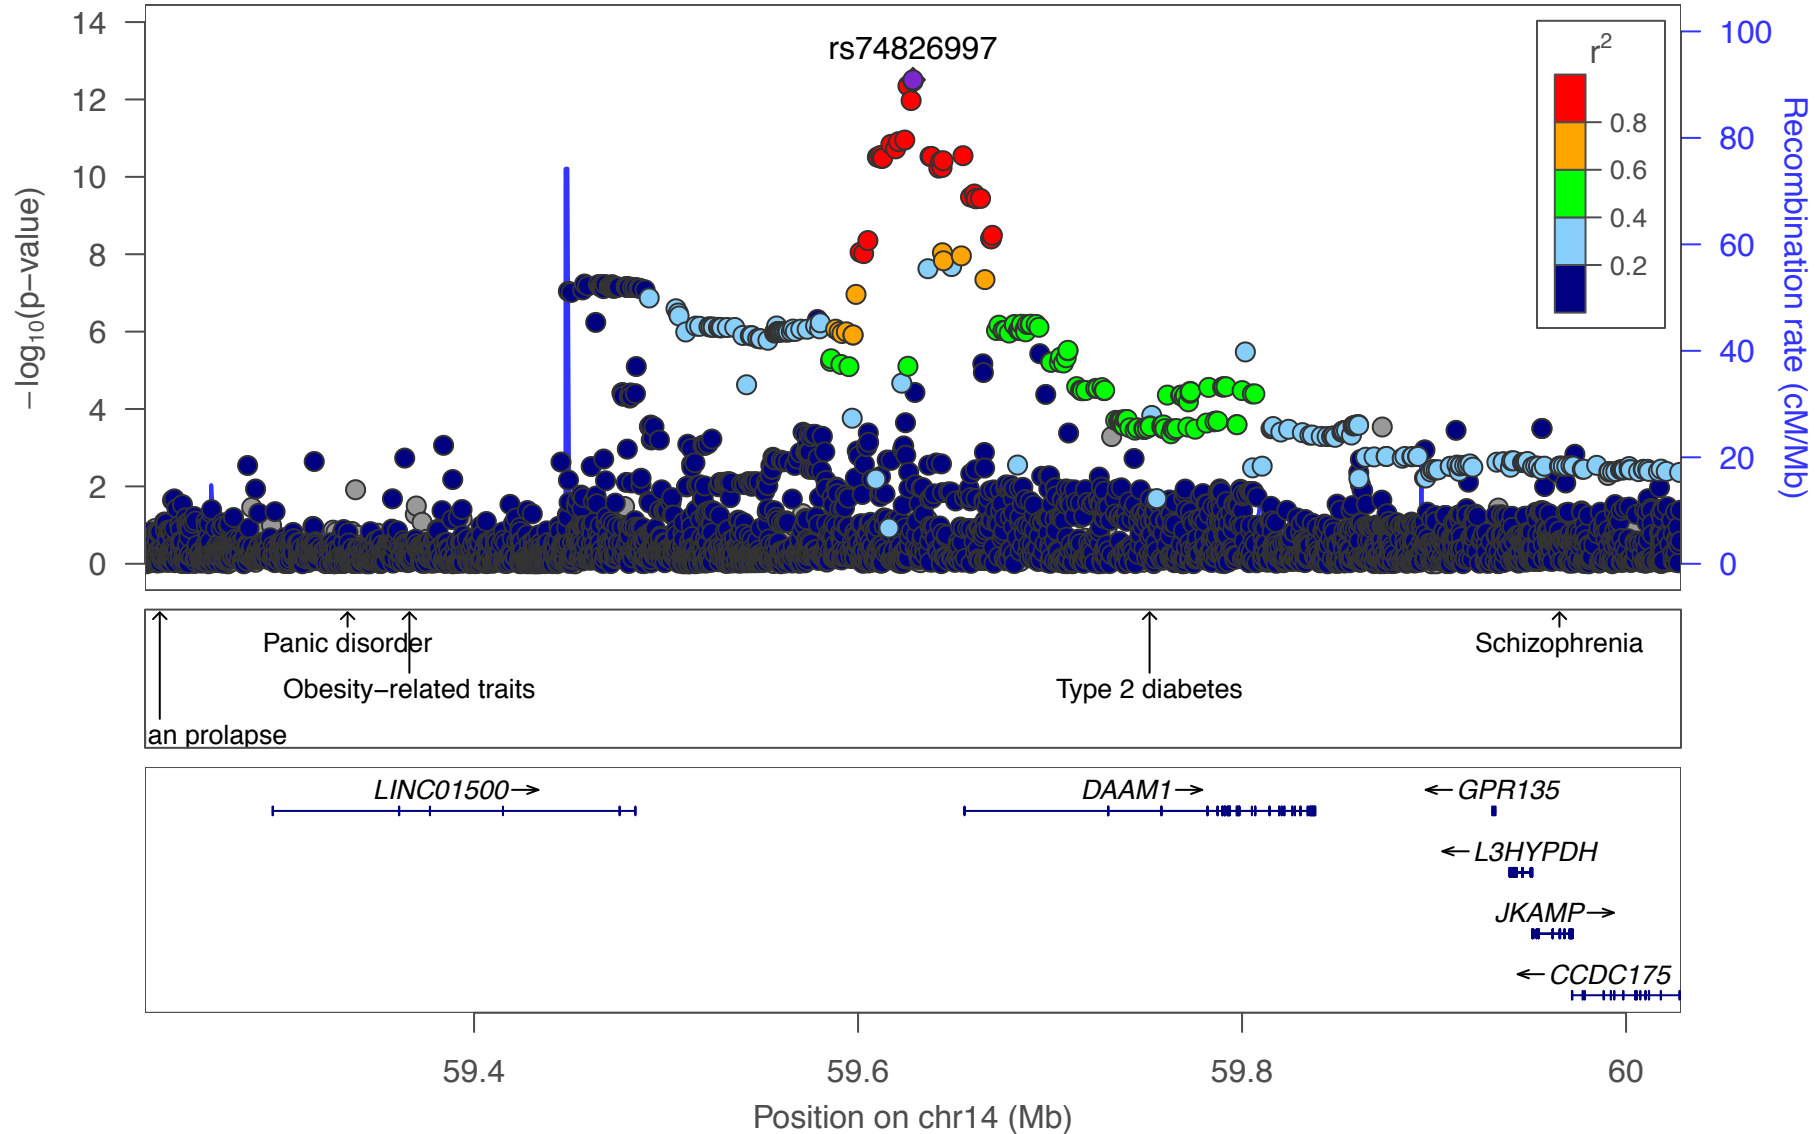

date: Thu Aug 17 19:09:22 2017

build: hg19

display range: chr14:59228609–60028609 [59228609–60028609]

hilite range: 0 – 0 [ 0 – 0 ]

reference SNP: chr14:59628609

number of SNPs plotted: 4162

min P.value: 3.1E–13 [chr14:59628609]

max P.value: 10E–1 [chr14:59452591]

## GWAS Catalog SNPs in Region

| <b>chr</b> | <b>pos (Mb)</b> | <b>trait</b>           | <b>snp</b>  |
|------------|-----------------|------------------------|-------------|
| 14         | 59.23631        | Pelvic organ prolapse  | rs7147087   |
| 14         | 59.33413        | Panic disorder         | rs4901869   |
| 14         | 59.36632        | Obesity-related traits | rs405460    |
| 14         | 59.75183        | Type 2 diabetes        | rs35209784  |
| 14         | 59.96529        | Schizophrenia          | rs111803315 |

# a2009s\_lh\_S\_calcarine\_area

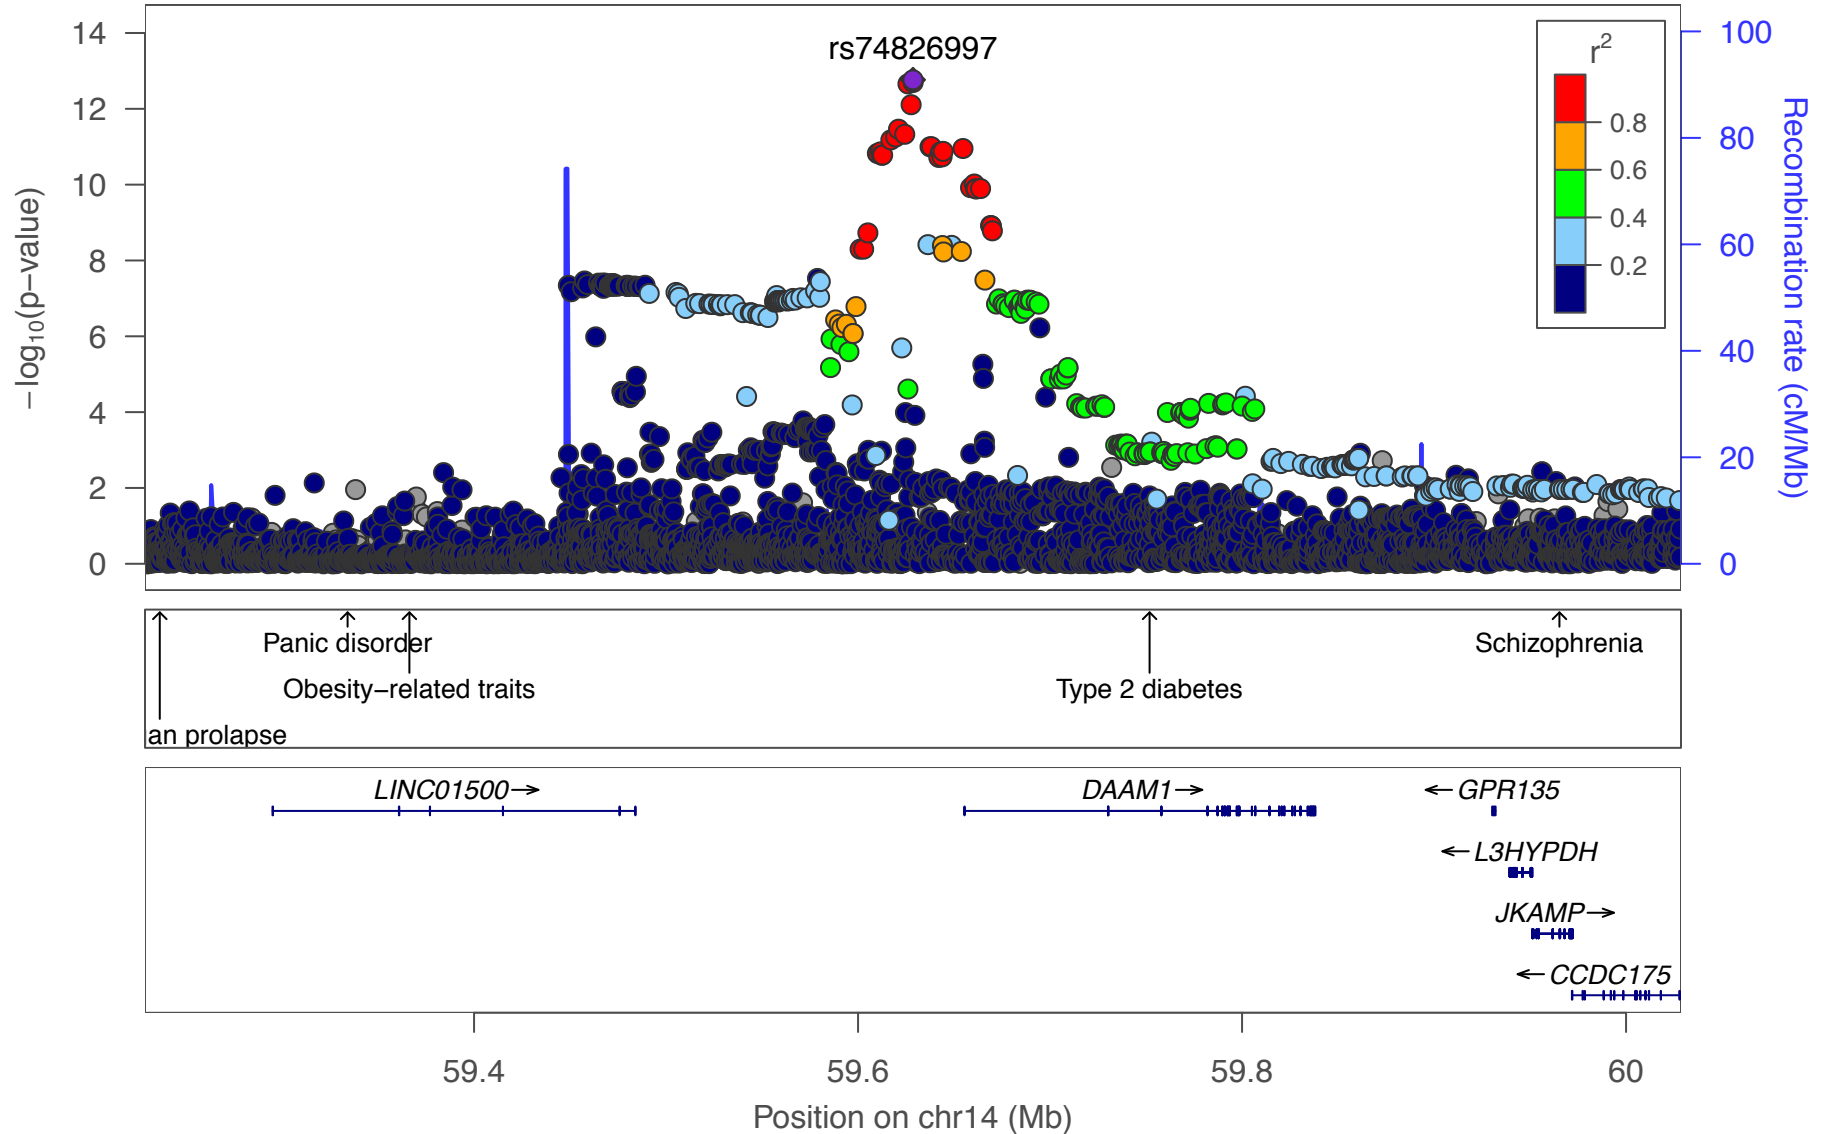

date: Thu Aug 17 19:08:59 2017

build: hg19

display range: chr14:59228609–60028609 [59228609–60028609]

hilite range: 0 – 0 [ 0 – 0 ]

reference SNP: chr14:59628609

number of SNPs plotted: 4162

min P.value: 1.72E–13 [chr14:59628609]

max P.value: 10E–1 [chr14:59263090]

## GWAS Catalog SNPs in Region

| <b>chr</b> | <b>pos (Mb)</b> | <b>trait</b>           | <b>snp</b>  |
|------------|-----------------|------------------------|-------------|
| 14         | 59.23631        | Pelvic organ prolapse  | rs7147087   |
| 14         | 59.33413        | Panic disorder         | rs4901869   |
| 14         | 59.36632        | Obesity-related traits | rs405460    |
| 14         | 59.75183        | Type 2 diabetes        | rs35209784  |
| 14         | 59.96529        | Schizophrenia          | rs111803315 |



# a2009s\_lh\_S\_subparietal\_area

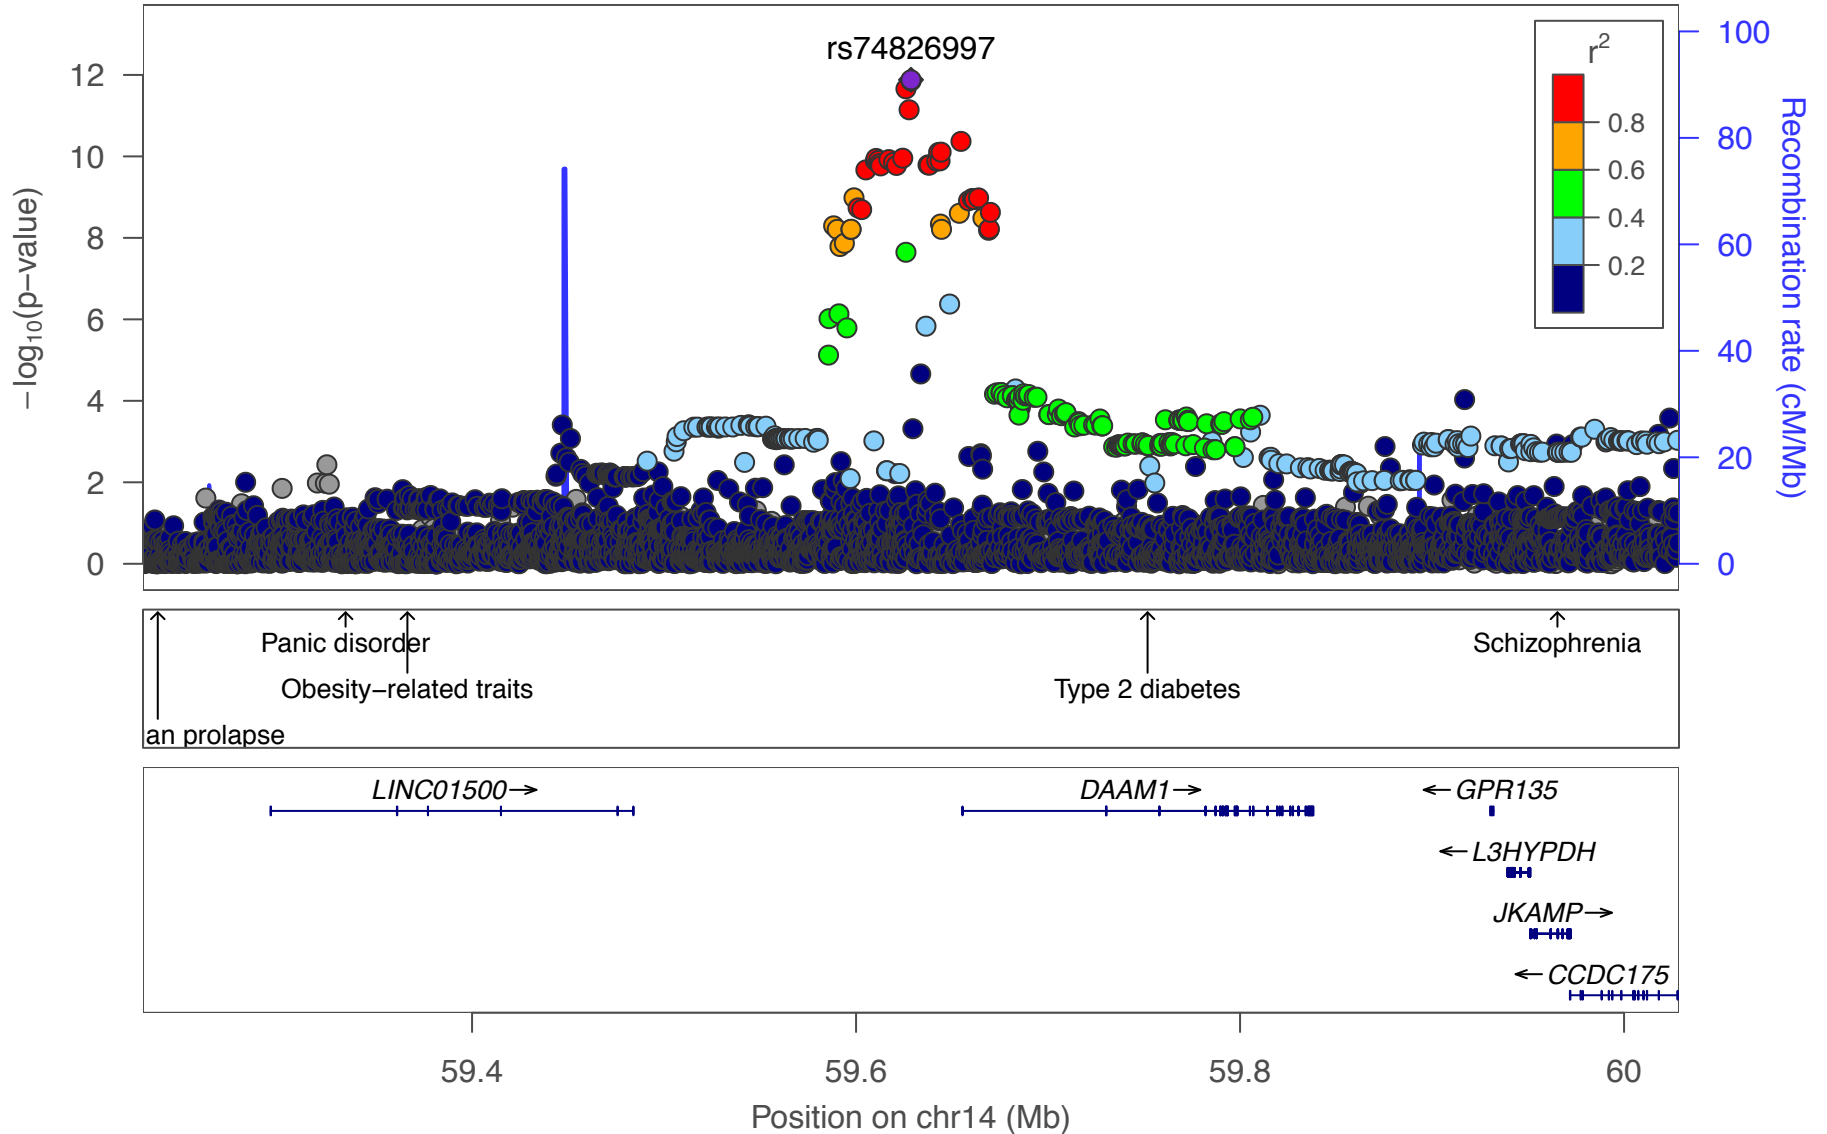

date: Thu Aug 17 18:55:02 2017

build: hg19

display range: chr14:59228609–60028609 [59228609–60028609]

hilite range: 0 – 0 [ 0 – 0 ]

reference SNP: chr14:59628609

number of SNPs plotted: 4162

min P.value: 1.32E–12 [chr14:59628609]

max P.value: 10E–1 [chr14:59768278]

## GWAS Catalog SNPs in Region

| <b>chr</b> | <b>pos (Mb)</b> | <b>trait</b>           | <b>snp</b>  |
|------------|-----------------|------------------------|-------------|
| 14         | 59.23631        | Pelvic organ prolapse  | rs7147087   |
| 14         | 59.33413        | Panic disorder         | rs4901869   |
| 14         | 59.36632        | Obesity-related traits | rs405460    |
| 14         | 59.75183        | Type 2 diabetes        | rs35209784  |
| 14         | 59.96529        | Schizophrenia          | rs111803315 |

# DKAtlas\_rh\_pericalcarine\_area

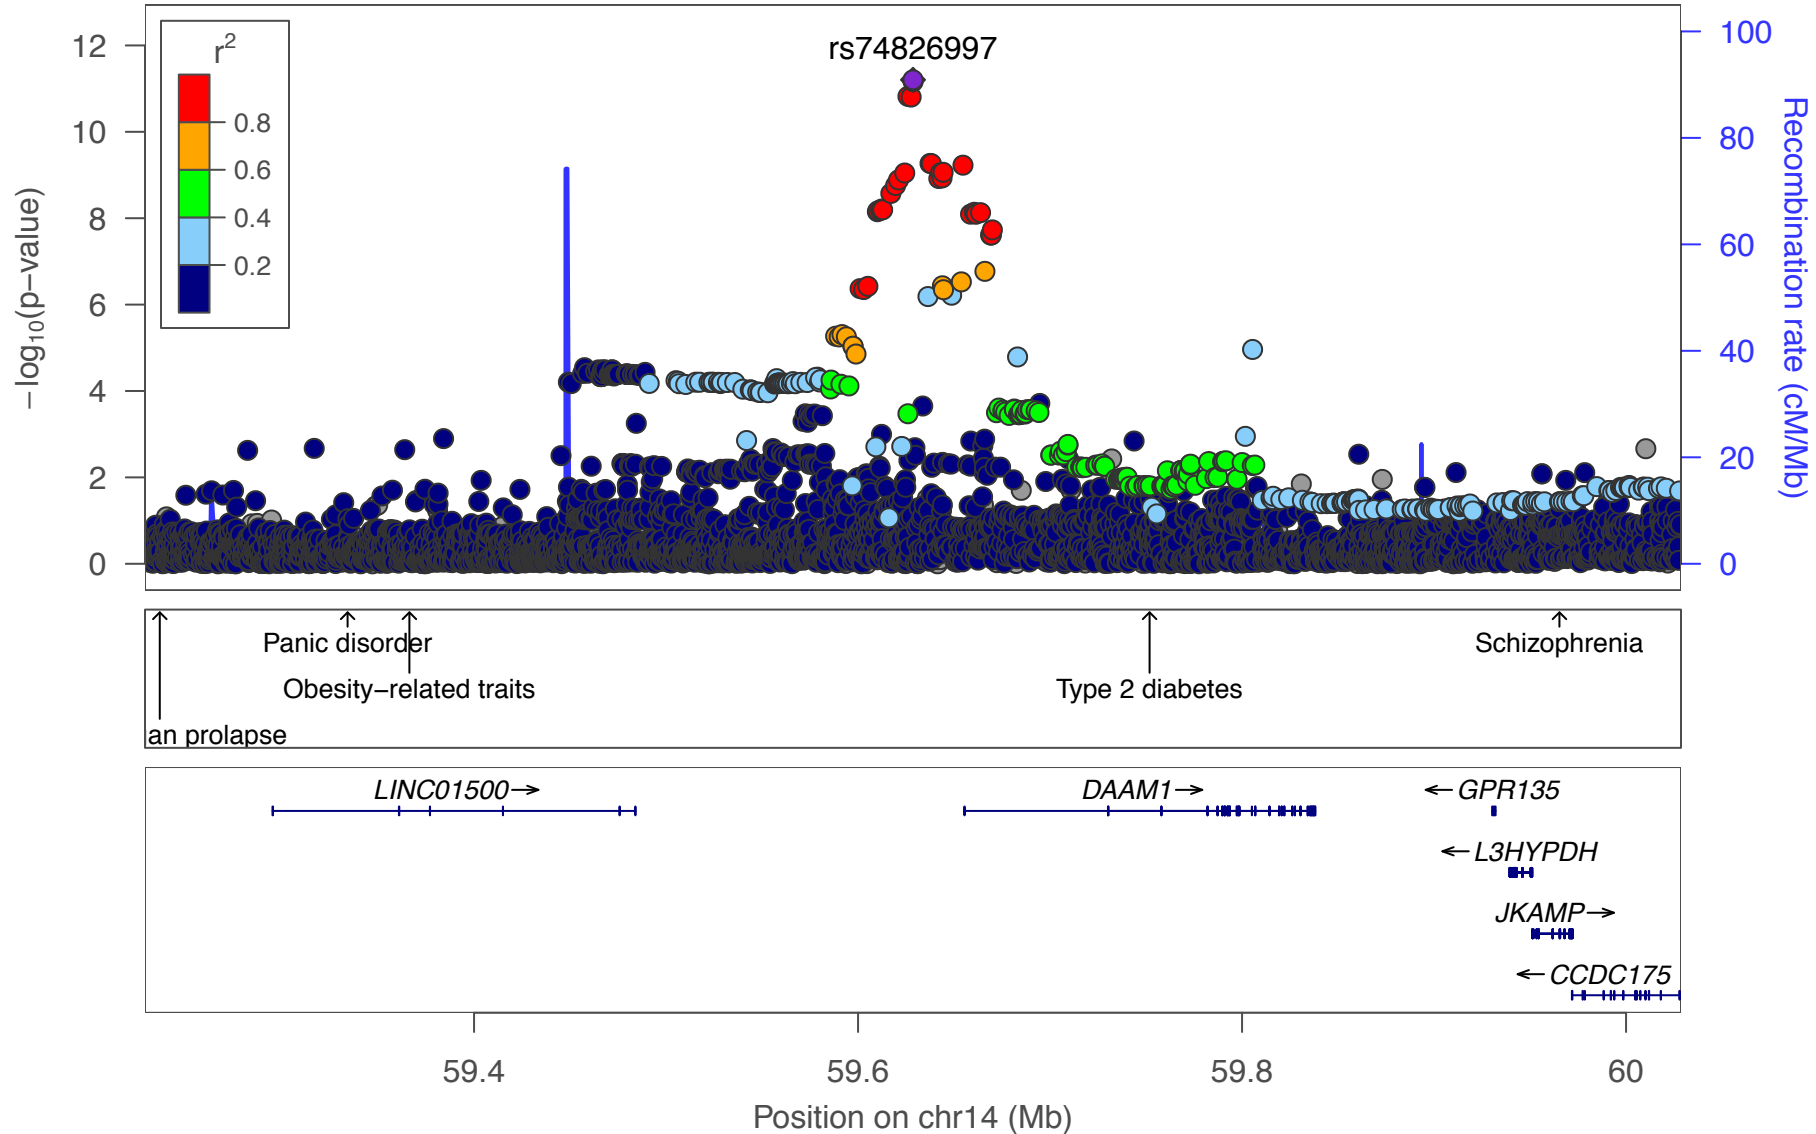

date: Thu Aug 17 18:58:26 2017

build: hg19

display range: chr14:59228609–60028609 [59228609–60028609]

hilite range: 0 – 0 [ 0 – 0 ]

reference SNP: chr14:59628609

number of SNPs plotted: 4162

min P.value: 6.25E–12 [chr14:59628609]

max P.value: 10E–1 [chr14:59347121]

## GWAS Catalog SNPs in Region

| <b>chr</b> | <b>pos (Mb)</b> | <b>trait</b>           | <b>snp</b>  |
|------------|-----------------|------------------------|-------------|
| 14         | 59.23631        | Pelvic organ prolapse  | rs7147087   |
| 14         | 59.33413        | Panic disorder         | rs4901869   |
| 14         | 59.36632        | Obesity-related traits | rs405460    |
| 14         | 59.75183        | Type 2 diabetes        | rs35209784  |
| 14         | 59.96529        | Schizophrenia          | rs111803315 |

# a2009s\_lh\_G\_cuneus\_area

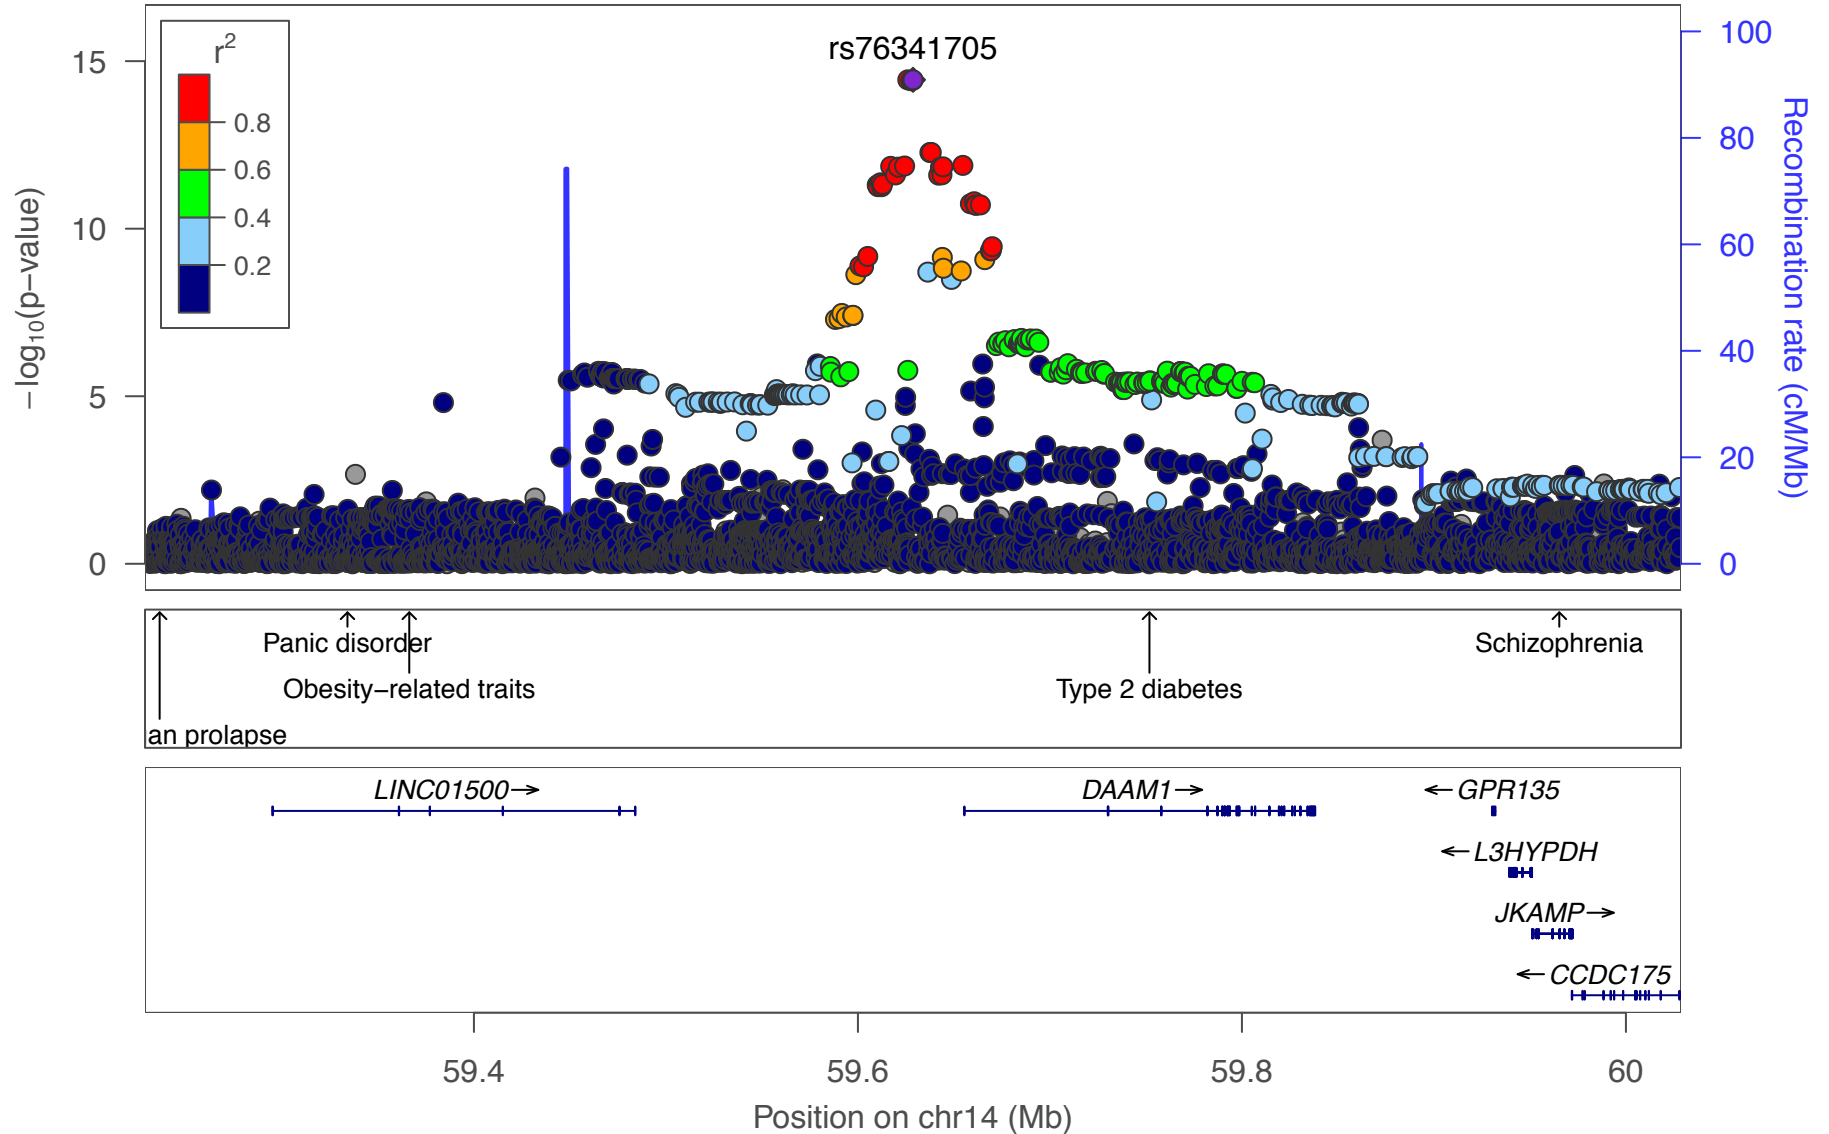

date: Thu Aug 17 18:58:26 2017

build: hg19

display range: chr14:59228679–60028679 [59228679–60028679]

hilite range: 0 – 0 [ 0 – 0 ]

reference SNP: chr14:59628679

number of SNPs plotted: 4162

min P.value: 3.61E–15 [chr14:59625997]

max P.value: 9.99E–1 [chr14:59439189]



## GWAS Catalog SNPs in Region

| <b>chr</b> | <b>pos (Mb)</b> | <b>trait</b>           | <b>snp</b>  |
|------------|-----------------|------------------------|-------------|
| 14         | 59.23631        | Pelvic organ prolapse  | rs7147087   |
| 14         | 59.33413        | Panic disorder         | rs4901869   |
| 14         | 59.36632        | Obesity-related traits | rs405460    |
| 14         | 59.75183        | Type 2 diabetes        | rs35209784  |
| 14         | 59.96529        | Schizophrenia          | rs111803315 |

# DKAtlas\_rh\_lingual\_area

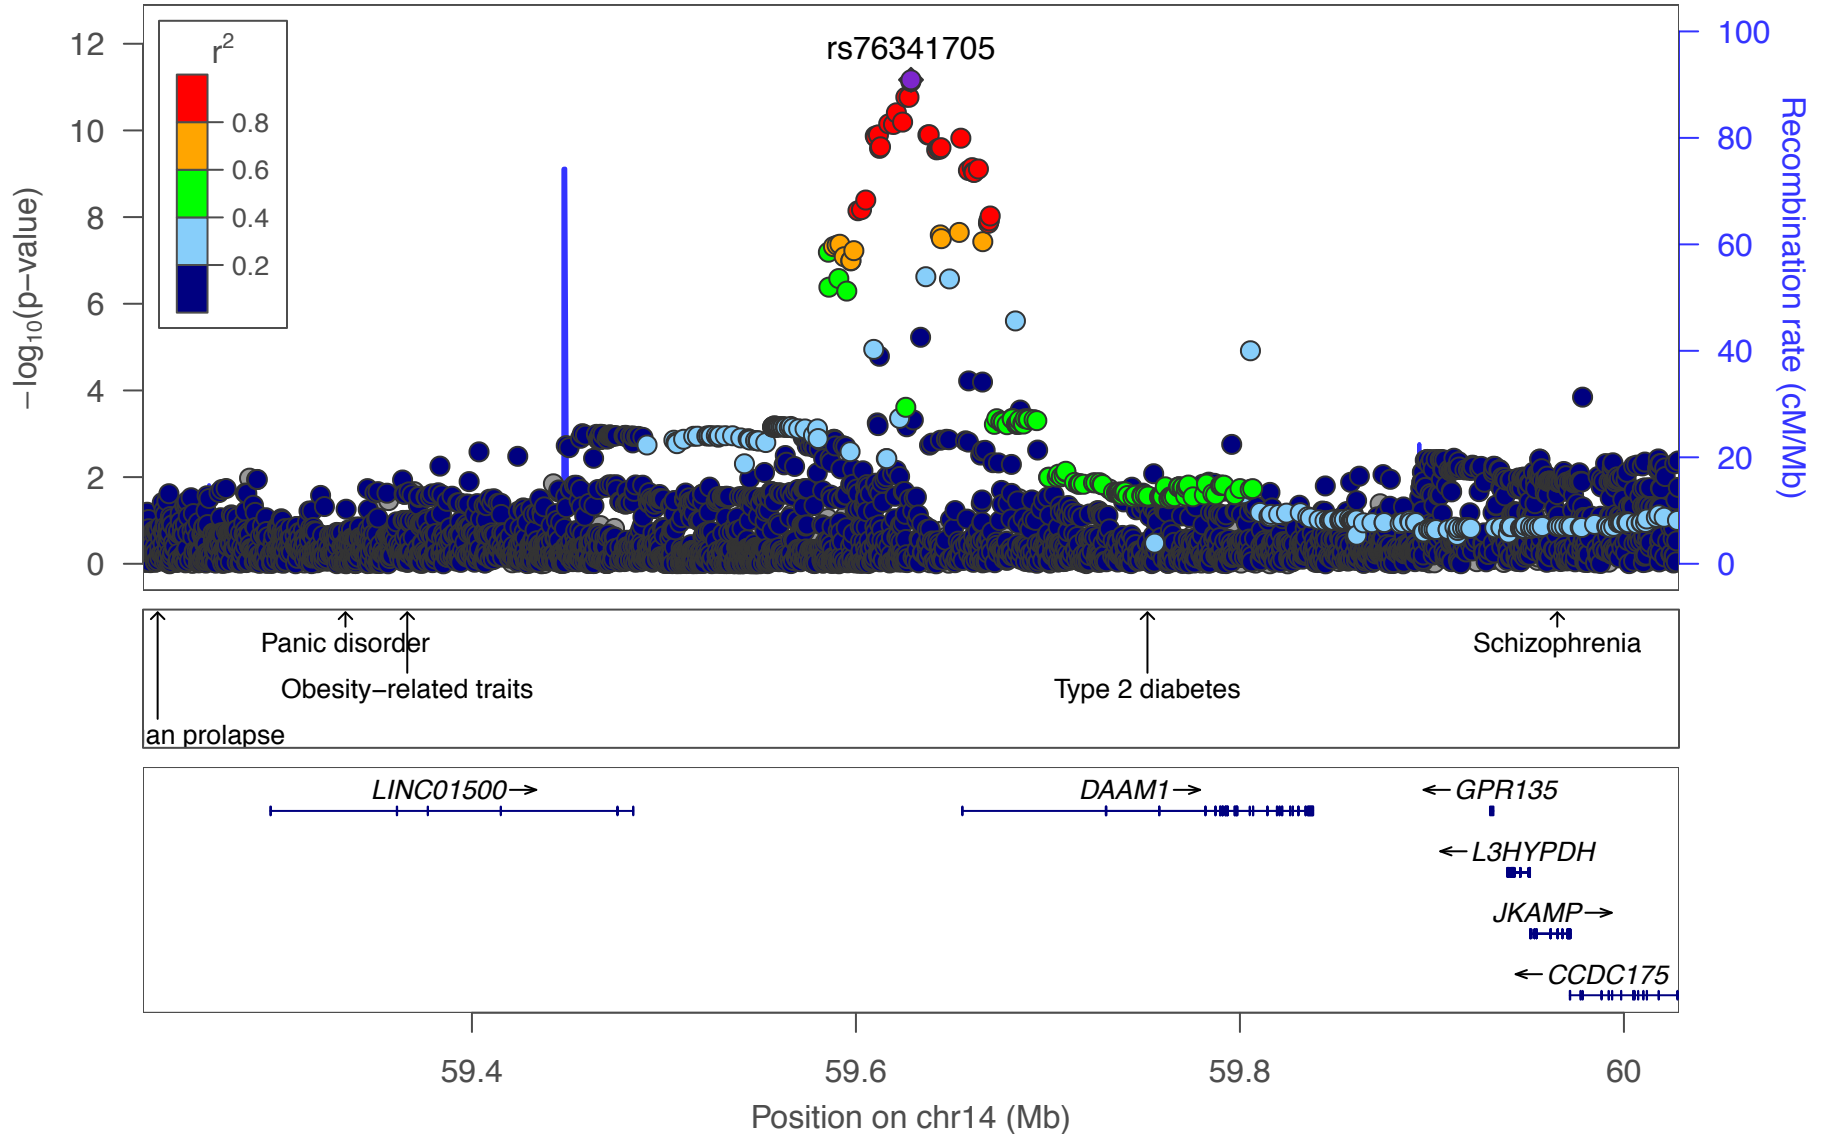

date: Thu Aug 17 18:58:37 2017

build: hg19

display range: chr14:59228679–60028679 [59228679–60028679]

hilite range: 0 – 0 [ 0 – 0 ]

reference SNP: chr14:59628679

number of SNPs plotted: 4162

min P.value: 6.79E–12 [chr14:59628679]

max P.value: 10E–1 [chr14:59824861]

## GWAS Catalog SNPs in Region

| <b>chr</b> | <b>pos (Mb)</b> | <b>trait</b>           | <b>snp</b>  |
|------------|-----------------|------------------------|-------------|
| 14         | 59.23631        | Pelvic organ prolapse  | rs7147087   |
| 14         | 59.33413        | Panic disorder         | rs4901869   |
| 14         | 59.36632        | Obesity-related traits | rs405460    |
| 14         | 59.75183        | Type 2 diabetes        | rs35209784  |
| 14         | 59.96529        | Schizophrenia          | rs111803315 |

# a2009s\_rh\_S\_calcarine\_area

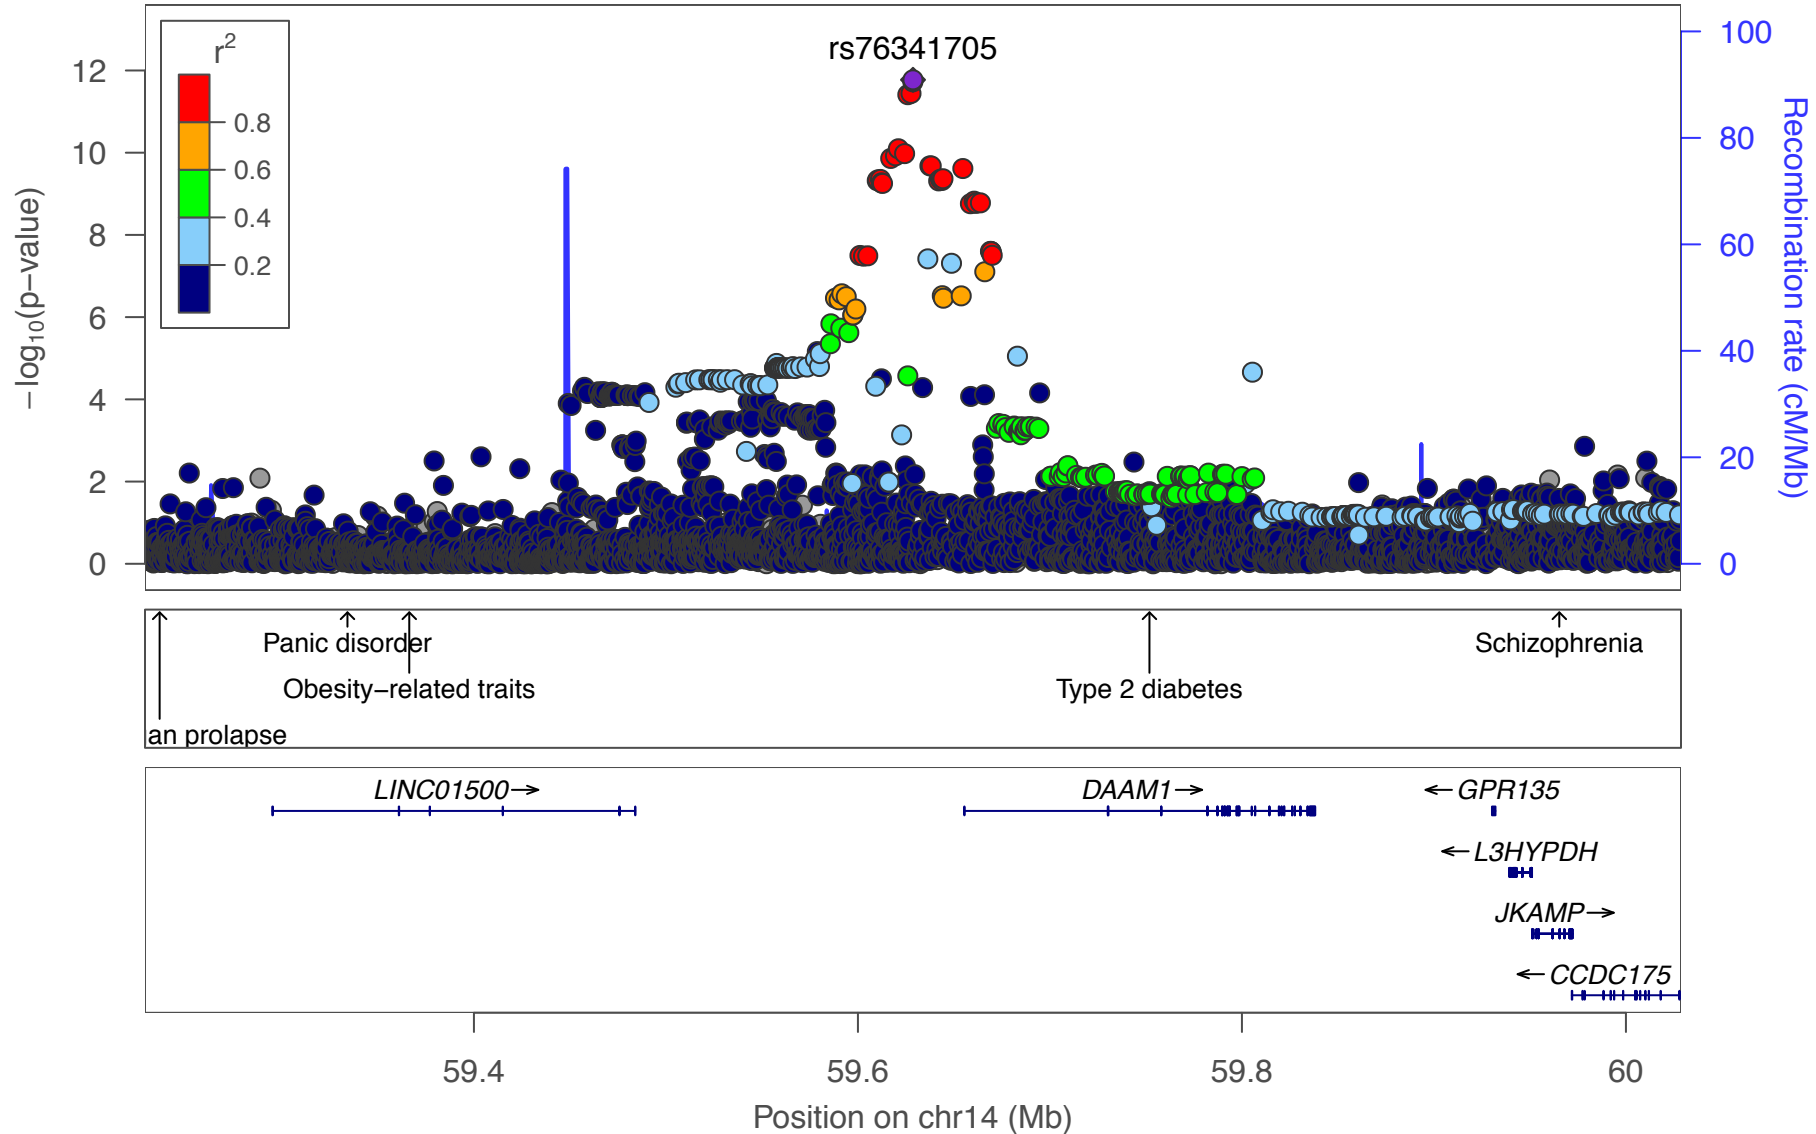

date: Thu Aug 17 18:58:36 2017

build: hg19

display range: chr14:59228679–60028679 [59228679–60028679]

hilite range: 0 – 0 [ 0 – 0 ]

reference SNP: chr14:59628679

number of SNPs plotted: 4162

min P.value: 1.69E–12 [chr14:59628679]

max P.value: 10E–1 [chr14:59429871]

## GWAS Catalog SNPs in Region

| <b>chr</b> | <b>pos (Mb)</b> | <b>trait</b>           | <b>snp</b>  |
|------------|-----------------|------------------------|-------------|
| 14         | 59.23631        | Pelvic organ prolapse  | rs7147087   |
| 14         | 59.33413        | Panic disorder         | rs4901869   |
| 14         | 59.36632        | Obesity-related traits | rs405460    |
| 14         | 59.75183        | Type 2 diabetes        | rs35209784  |
| 14         | 59.96529        | Schizophrenia          | rs111803315 |

# FAST\_ROIs\_L\_precentral\_gyrus

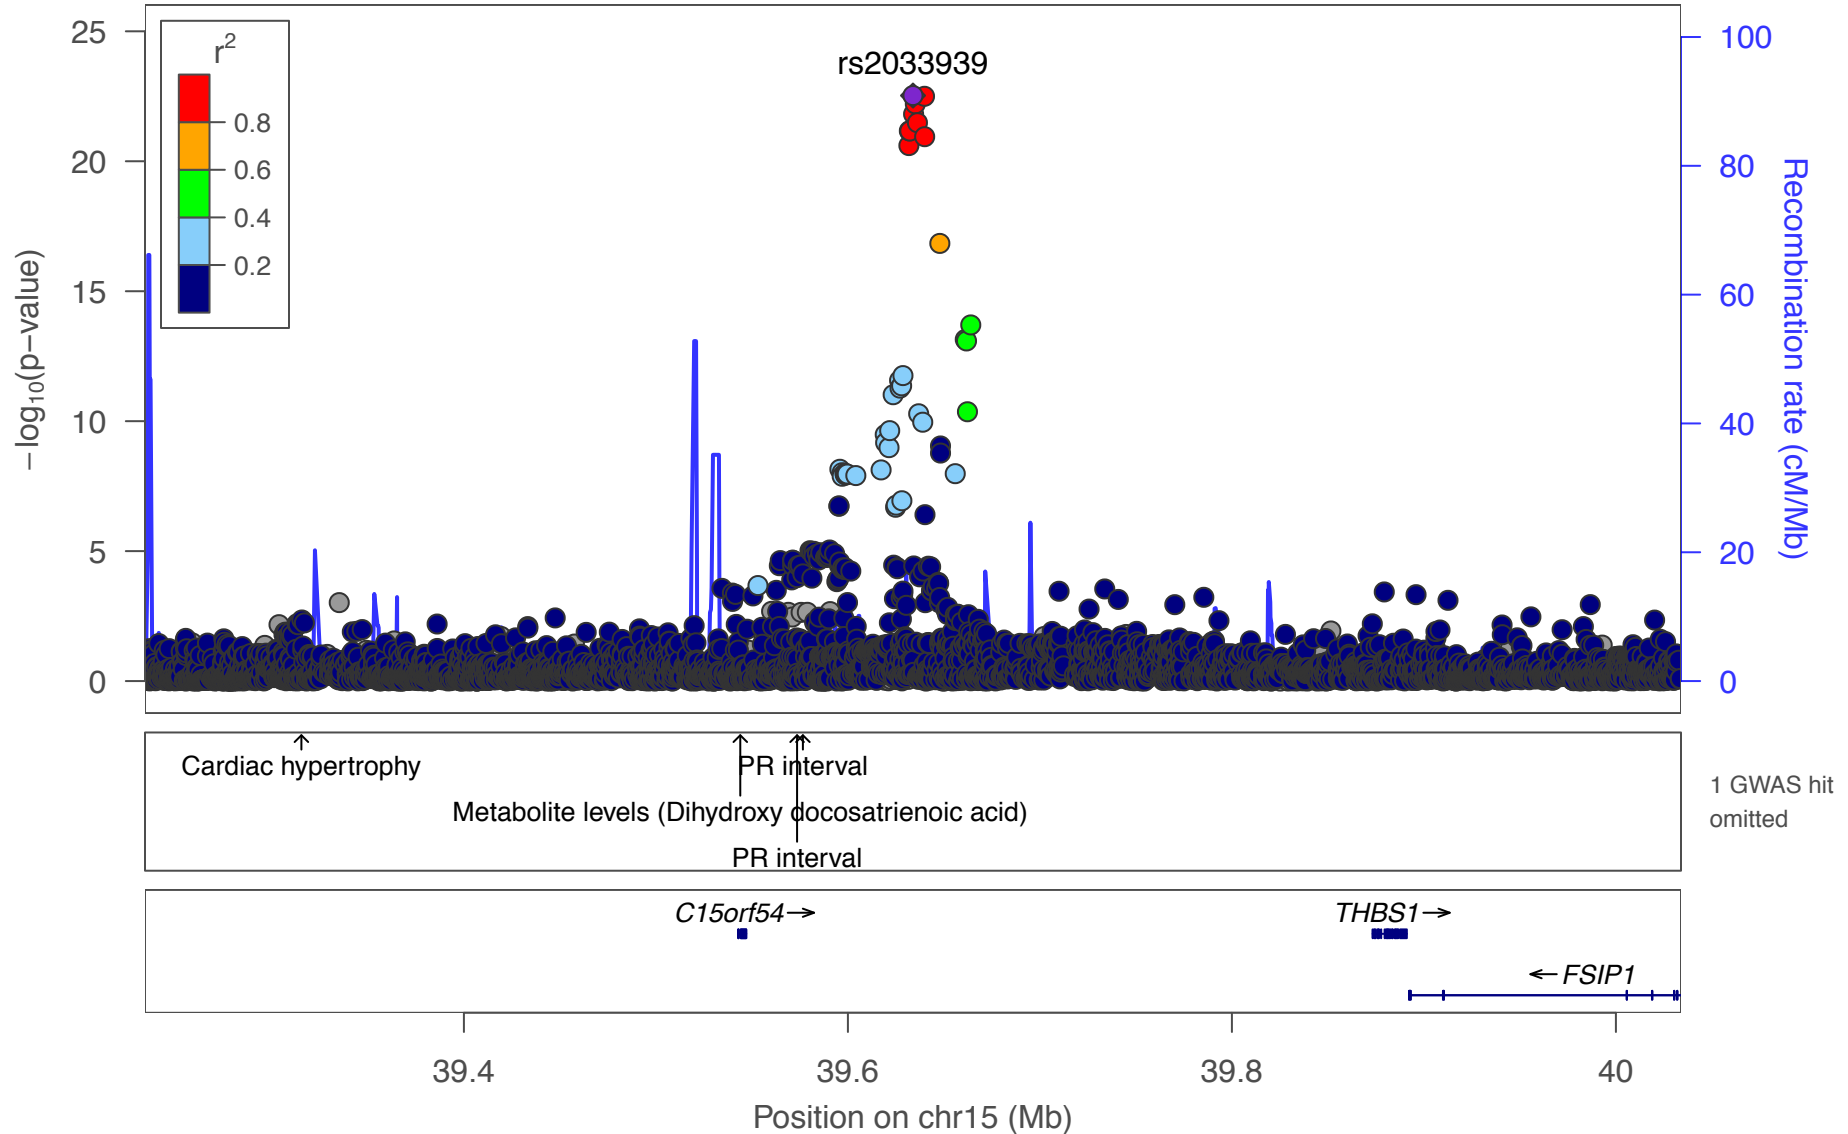



date: Thu Aug 17 19:08:08 2017

build: hg19

display range: chr15:39233904–40033904 [39233904–40033904]

hilite range: 0 – 0 [ 0 – 0 ]

reference SNP: chr15:39633904

number of SNPs plotted: 4352

min P.value: 2.96E–23 [chr15:39633904]

max P.value: 10E–1 [chr15:39368012]

omitted GWAS Hits: NA

## GWAS Catalog SNPs in Region

| <b>chr</b> | <b>pos (Mb)</b> | <b>trait</b>                                      | <b>snp</b> |
|------------|-----------------|---------------------------------------------------|------------|
| 15         | 39.31536        | Cardiac hypertrophy                               | rs12907914 |
| 15         | 39.34705        | Parental extreme longevity (95 years and older)   | rs78539969 |
| 15         | 39.54395        | Metabolite levels (Dihydroxy docosatrienoic acid) | rs17691453 |
| 15         | 39.57353        | PR interval                                       | rs12595668 |
| 15         | 39.57656        | PR interval                                       | rs746265   |

# a2009s\_rh\_GandS\_subcentral\_area

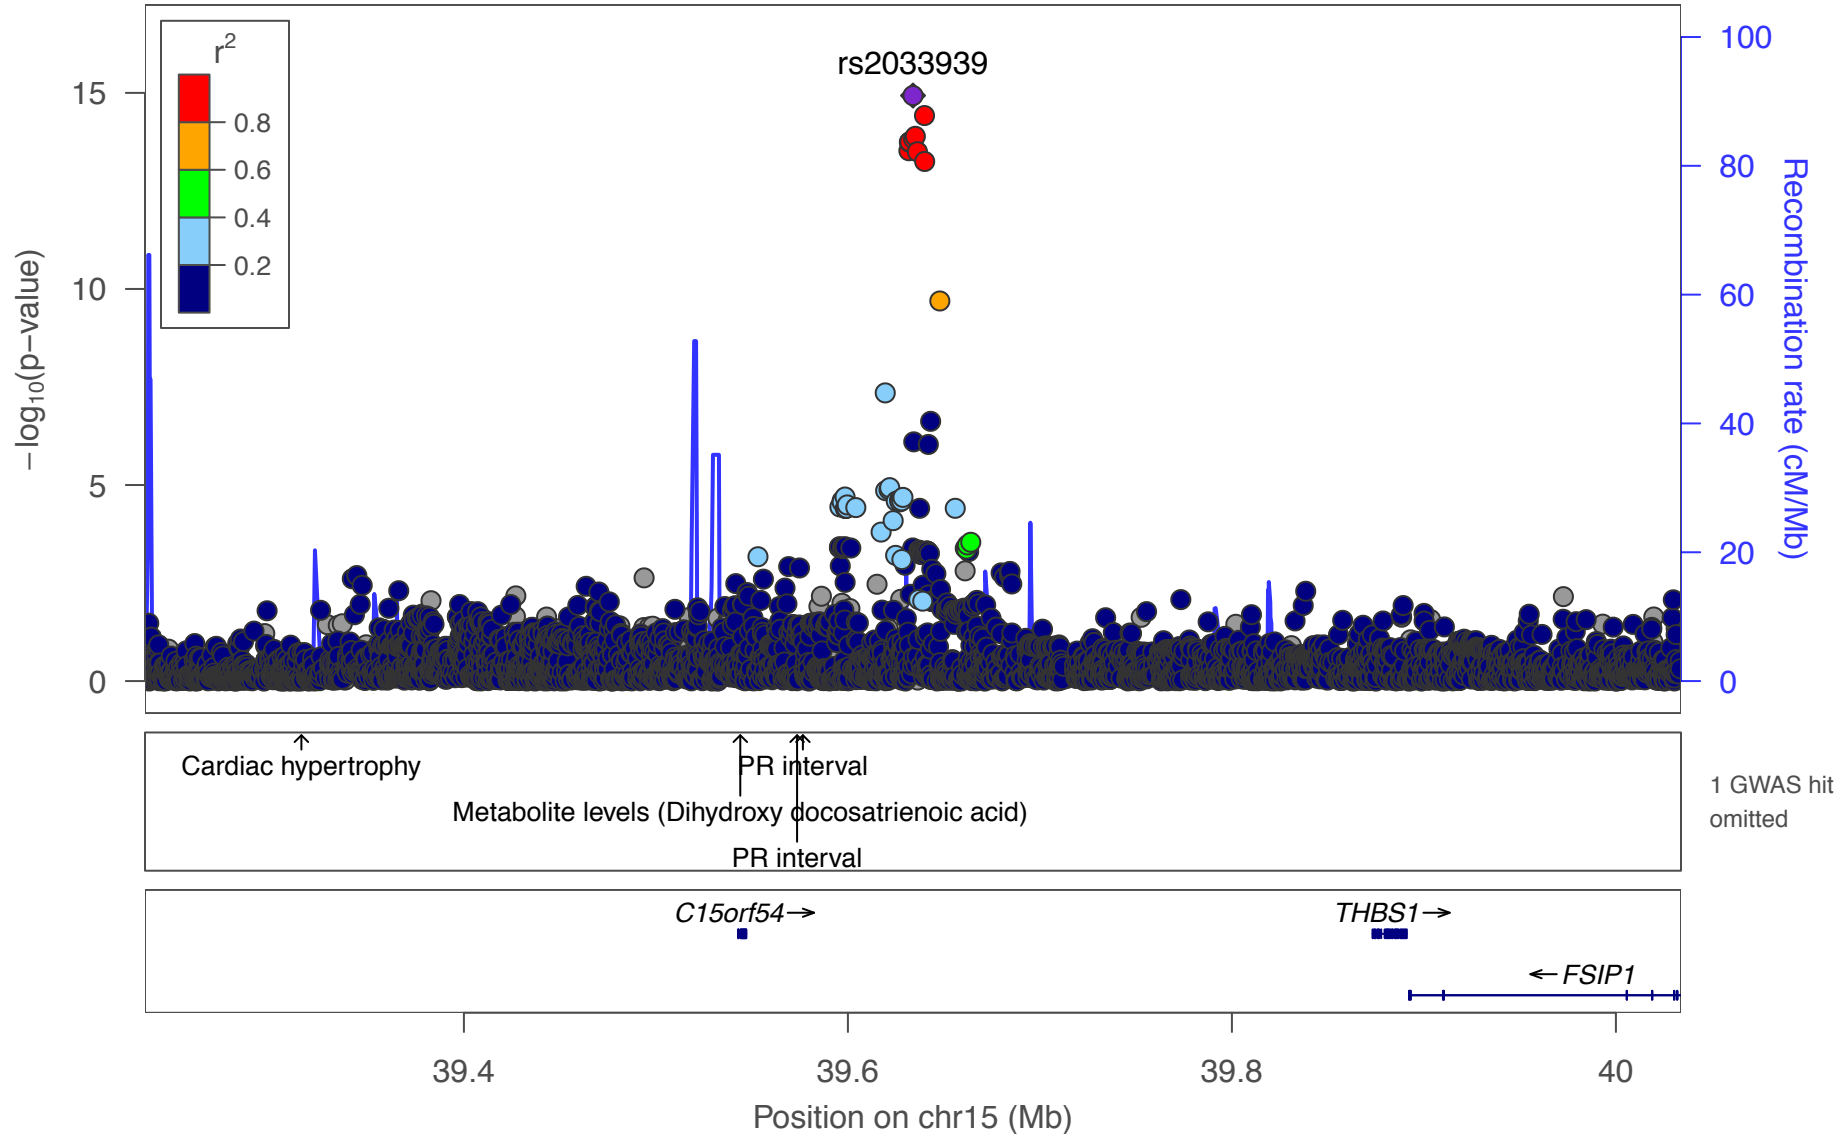

date: Thu Aug 17 18:47:49 2017

build: hg19

display range: chr15:39233904–40033904 [39233904–40033904]

hilite range: 0 – 0 [ 0 – 0 ]

reference SNP: chr15:39633904

number of SNPs plotted: 4352

min P.value: 1.17E–15 [chr15:39633904]

max P.value: 10E–1 [chr15:39874973]

omitted GWAS Hits: NA

## GWAS Catalog SNPs in Region

| <b>chr</b> | <b>pos (Mb)</b> | <b>trait</b>                                      | <b>snp</b> |
|------------|-----------------|---------------------------------------------------|------------|
| 15         | 39.31536        | Cardiac hypertrophy                               | rs12907914 |
| 15         | 39.34705        | Parental extreme longevity (95 years and older)   | rs78539969 |
| 15         | 39.54395        | Metabolite levels (Dihydroxy docosatrienoic acid) | rs17691453 |
| 15         | 39.57353        | PR interval                                       | rs12595668 |
| 15         | 39.57656        | PR interval                                       | rs746265   |

# DKAtlas\_lh\_postcentral\_thickness

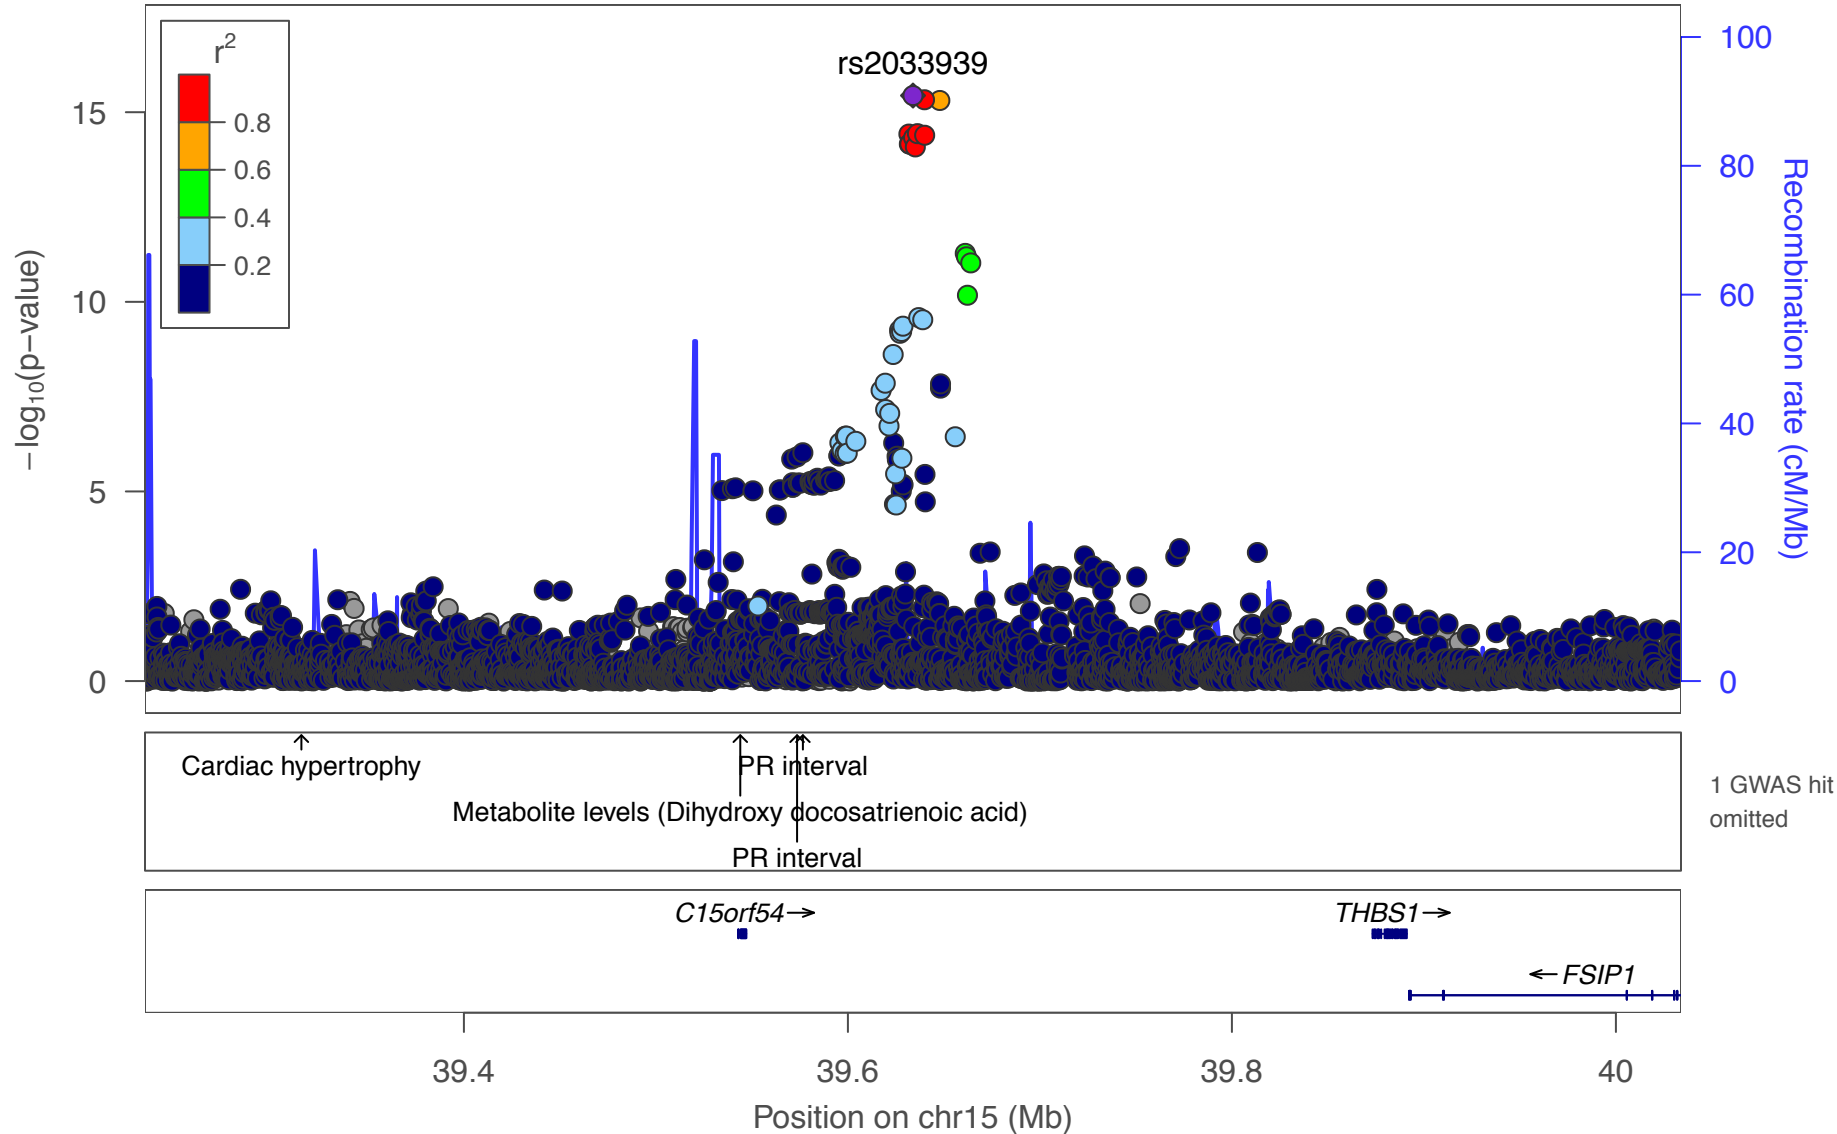

date: Thu Aug 17 18:55:24 2017

build: hg19

display range: chr15:39233904–40033904 [39233904–40033904]

hilite range: 0 – 0 [ 0 – 0 ]

reference SNP: chr15:39633904

number of SNPs plotted: 4352

min P.value: 3.64E–16 [chr15:39633904]

max P.value: 10E–1 [chr15:39807423]

omitted GWAS Hits: NA

## GWAS Catalog SNPs in Region

| <b>chr</b> | <b>pos (Mb)</b> | <b>trait</b>                                      | <b>snp</b> |
|------------|-----------------|---------------------------------------------------|------------|
| 15         | 39.31536        | Cardiac hypertrophy                               | rs12907914 |
| 15         | 39.34705        | Parental extreme longevity (95 years and older)   | rs78539969 |
| 15         | 39.54395        | Metabolite levels (Dihydroxy docosatrienoic acid) | rs17691453 |
| 15         | 39.57353        | PR interval                                       | rs12595668 |
| 15         | 39.57656        | PR interval                                       | rs746265   |



# a2009s\_lh\_G\_postcentral\_thickness

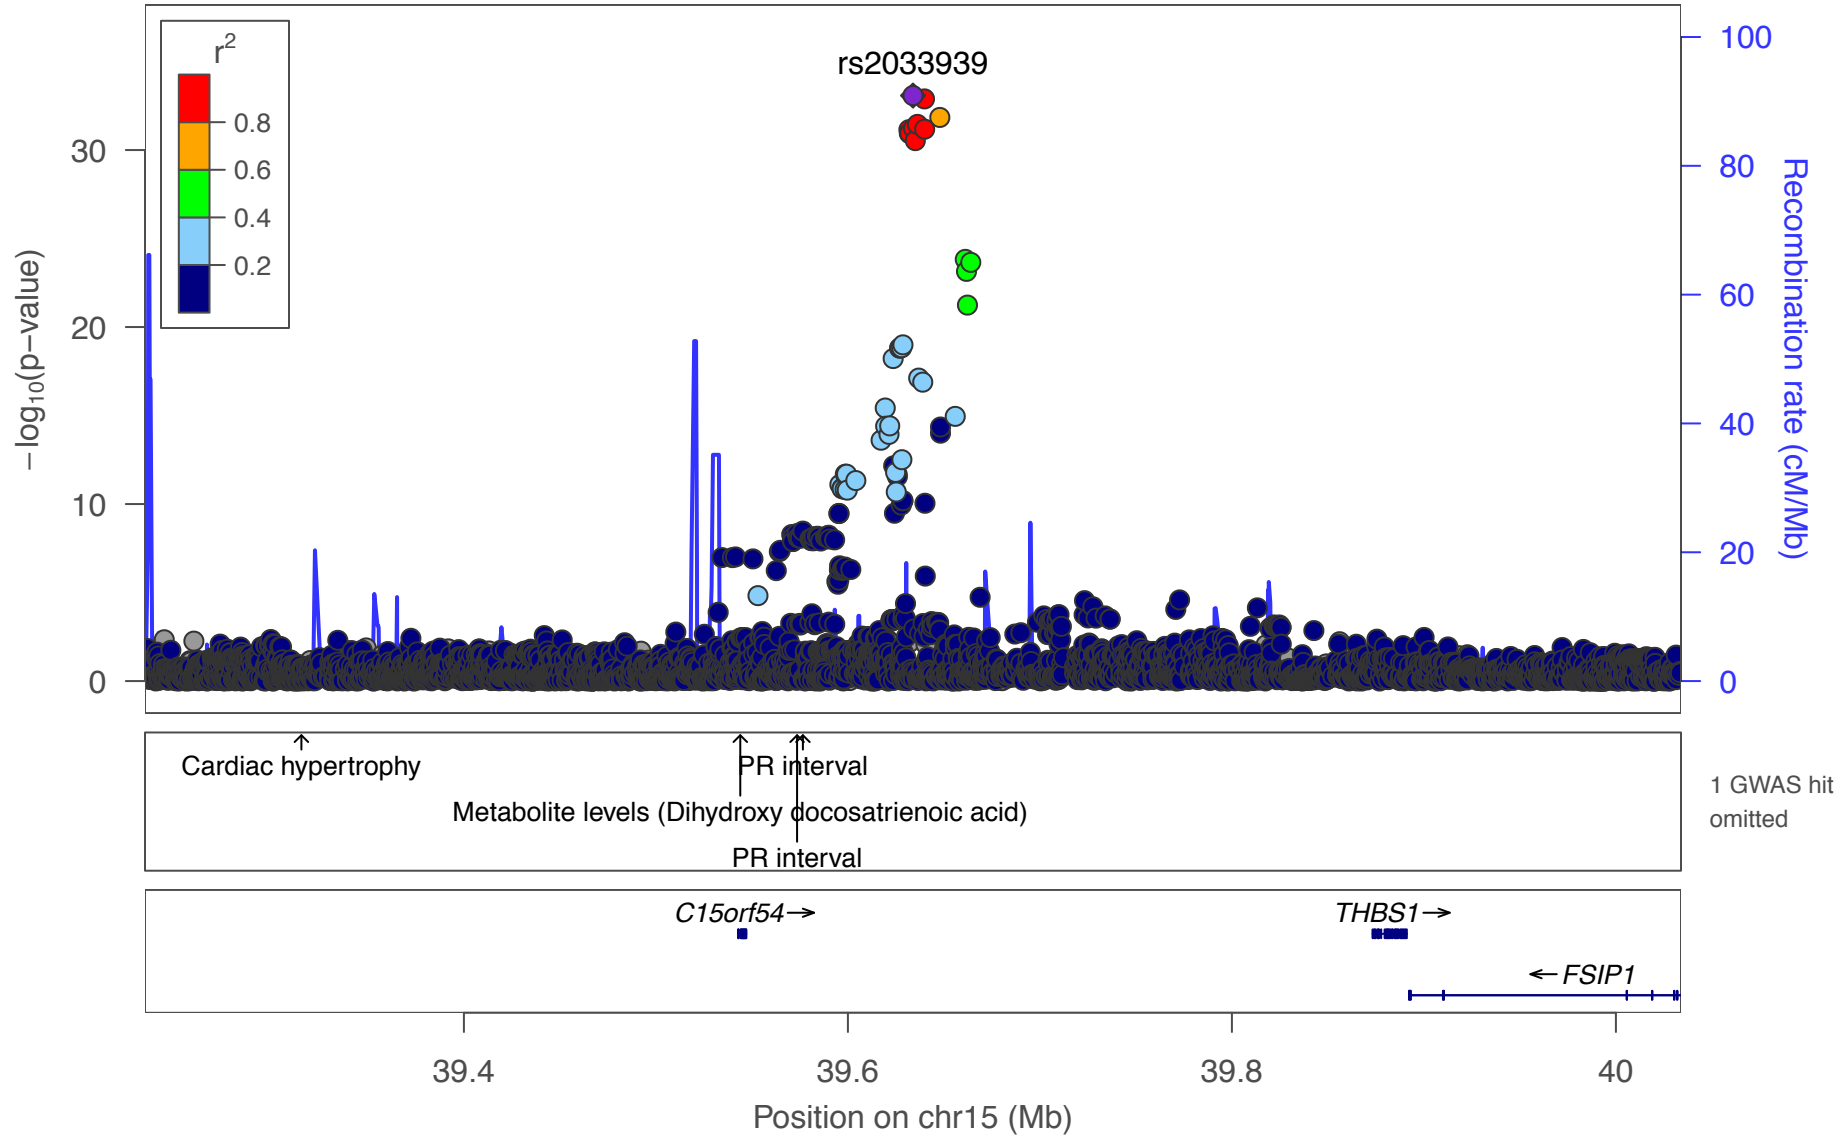

date: Thu Aug 17 19:07:32 2017

build: hg19

display range: chr15:39233904–40033904 [39233904–40033904]

hilite range: 0 – 0 [ 0 – 0 ]

reference SNP: chr15:39633904

number of SNPs plotted: 4352

min P.value: 8.36E–34 [chr15:39633904]

max P.value: 10E–1 [chr15:39982927]

omitted GWAS Hits: NA

## GWAS Catalog SNPs in Region

| <b>chr</b> | <b>pos (Mb)</b> | <b>trait</b>                                      | <b>snp</b> |
|------------|-----------------|---------------------------------------------------|------------|
| 15         | 39.31536        | Cardiac hypertrophy                               | rs12907914 |
| 15         | 39.34705        | Parental extreme longevity (95 years and older)   | rs78539969 |
| 15         | 39.54395        | Metabolite levels (Dihydroxy docosatrienoic acid) | rs17691453 |
| 15         | 39.57353        | PR interval                                       | rs12595668 |
| 15         | 39.57656        | PR interval                                       | rs746265   |

# DKAtlas\_rh\_postcentral\_thickness

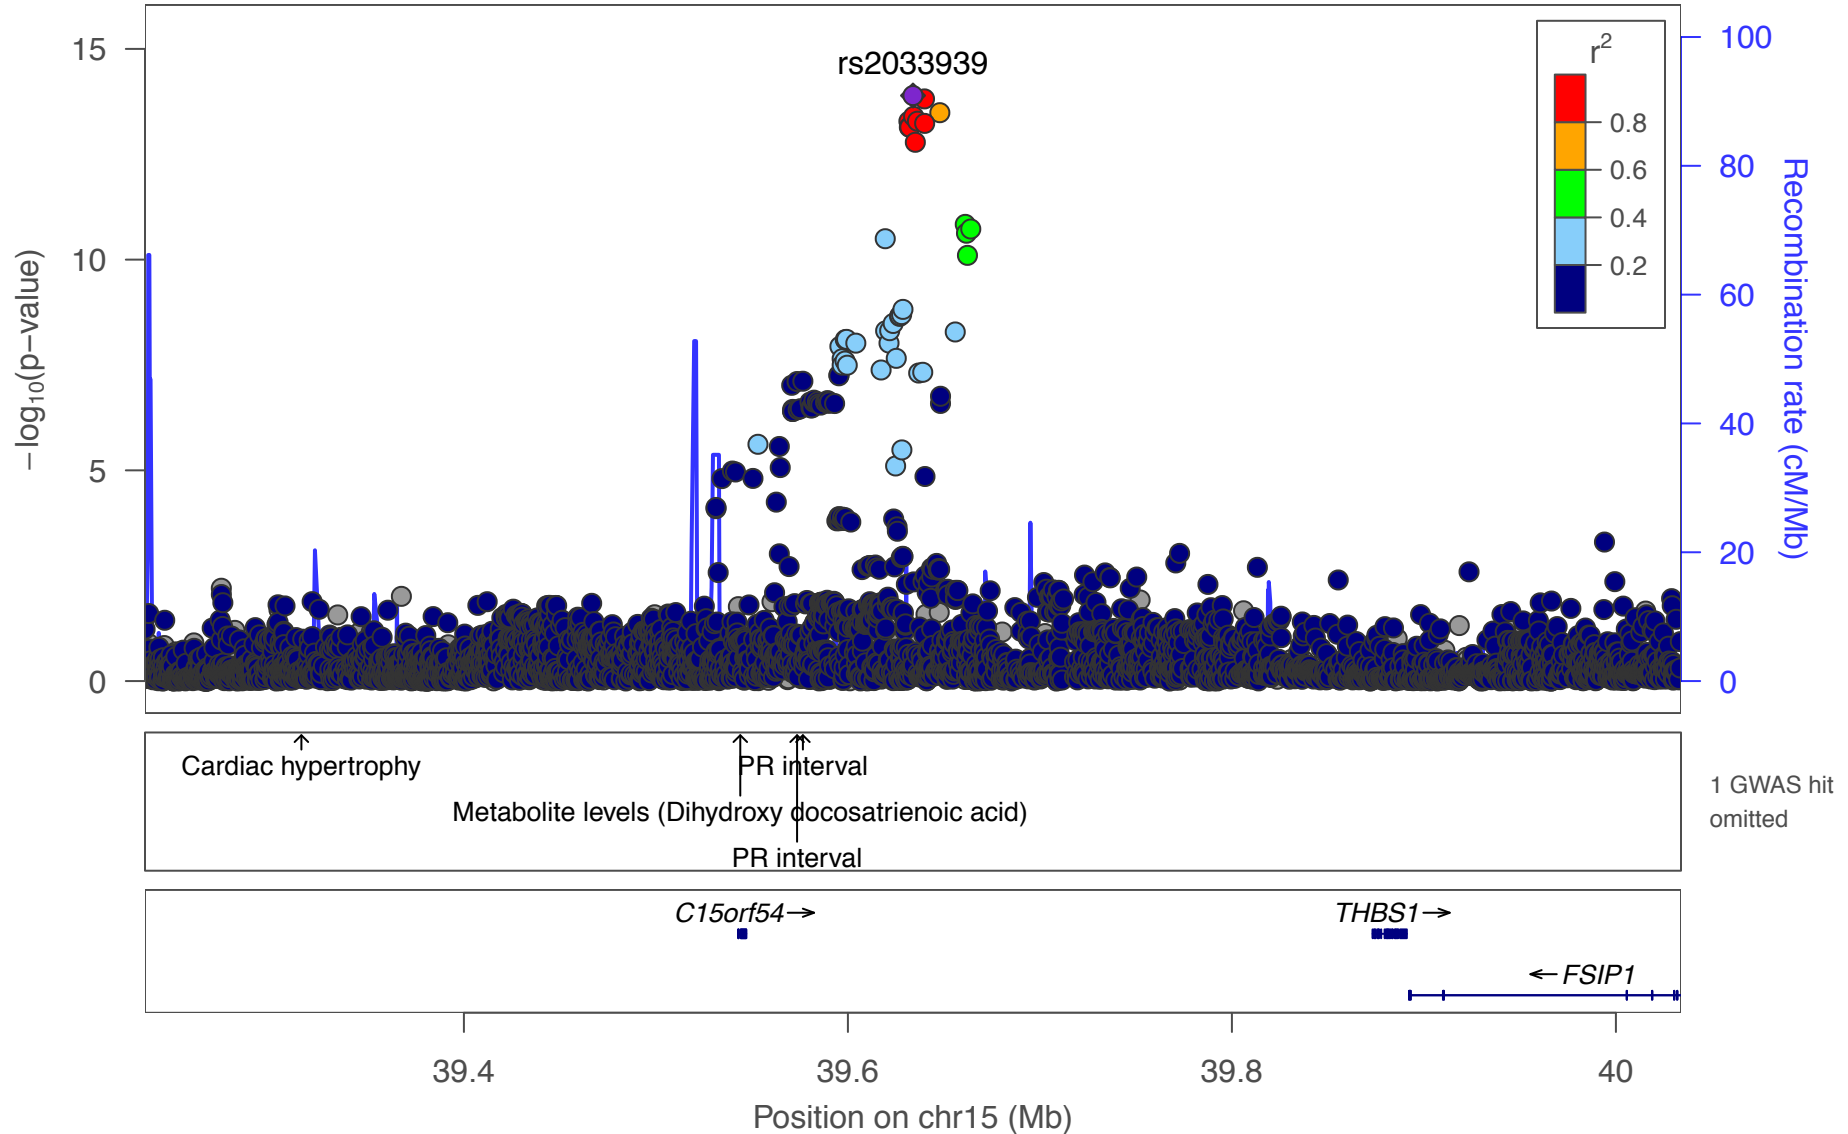

date: Thu Aug 17 18:47:48 2017

build: hg19

display range: chr15:39233904–40033904 [39233904–40033904]

hilite range: 0 – 0 [ 0 – 0 ]

reference SNP: chr15:39633904

number of SNPs plotted: 4352

min P.value: 1.28E–14 [chr15:39633904]

max P.value: 9.99E–1 [chr15:39265911]

omitted GWAS Hits: NA

## GWAS Catalog SNPs in Region

| <b>chr</b> | <b>pos (Mb)</b> | <b>trait</b>                                      | <b>snp</b> |
|------------|-----------------|---------------------------------------------------|------------|
| 15         | 39.31536        | Cardiac hypertrophy                               | rs12907914 |
| 15         | 39.34705        | Parental extreme longevity (95 years and older)   | rs78539969 |
| 15         | 39.54395        | Metabolite levels (Dihydroxy docosatrienoic acid) | rs17691453 |
| 15         | 39.57353        | PR interval                                       | rs12595668 |
| 15         | 39.57656        | PR interval                                       | rs746265   |

# a2009s\_rh\_G\_postcentral\_thickness

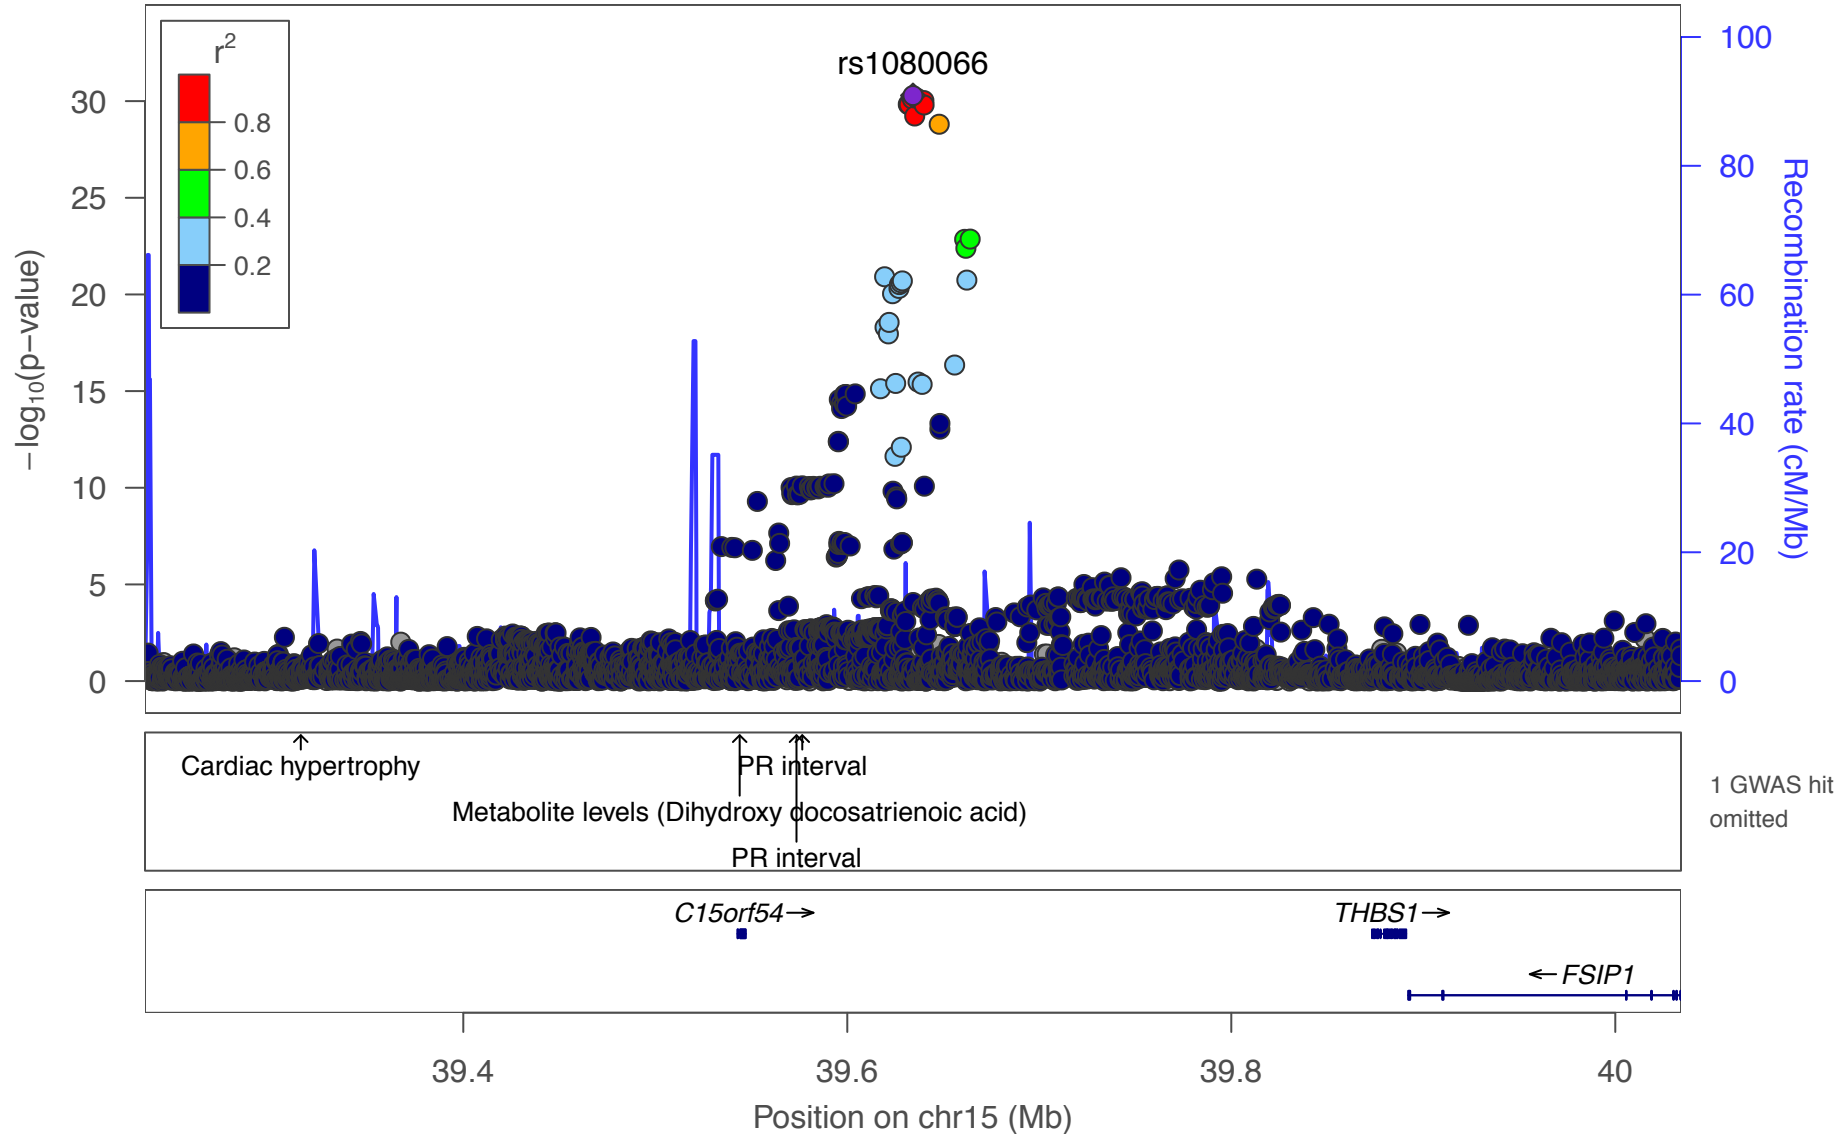

date: Thu Aug 17 19:07:32 2017

build: hg19

display range: chr15:39234222–40034222 [39234222–40034222]

hilite range: 0 – 0 [ 0 – 0 ]

reference SNP: chr15:39634222

number of SNPs plotted: 4350

min P.value: 5.15E–31 [chr15:39634222]

max P.value: 10E–1 [chr15:39396921]

omitted GWAS Hits: NA



## GWAS Catalog SNPs in Region

| <b>chr</b> | <b>pos (Mb)</b> | <b>trait</b>                                      | <b>snp</b> |
|------------|-----------------|---------------------------------------------------|------------|
| 15         | 39.31536        | Cardiac hypertrophy                               | rs12907914 |
| 15         | 39.34705        | Parental extreme longevity (95 years and older)   | rs78539969 |
| 15         | 39.54395        | Metabolite levels (Dihydroxy docosatrienoic acid) | rs17691453 |
| 15         | 39.57353        | PR interval                                       | rs12595668 |
| 15         | 39.57656        | PR interval                                       | rs746265   |

# DKTAtlas\_lh\_postcentral\_area

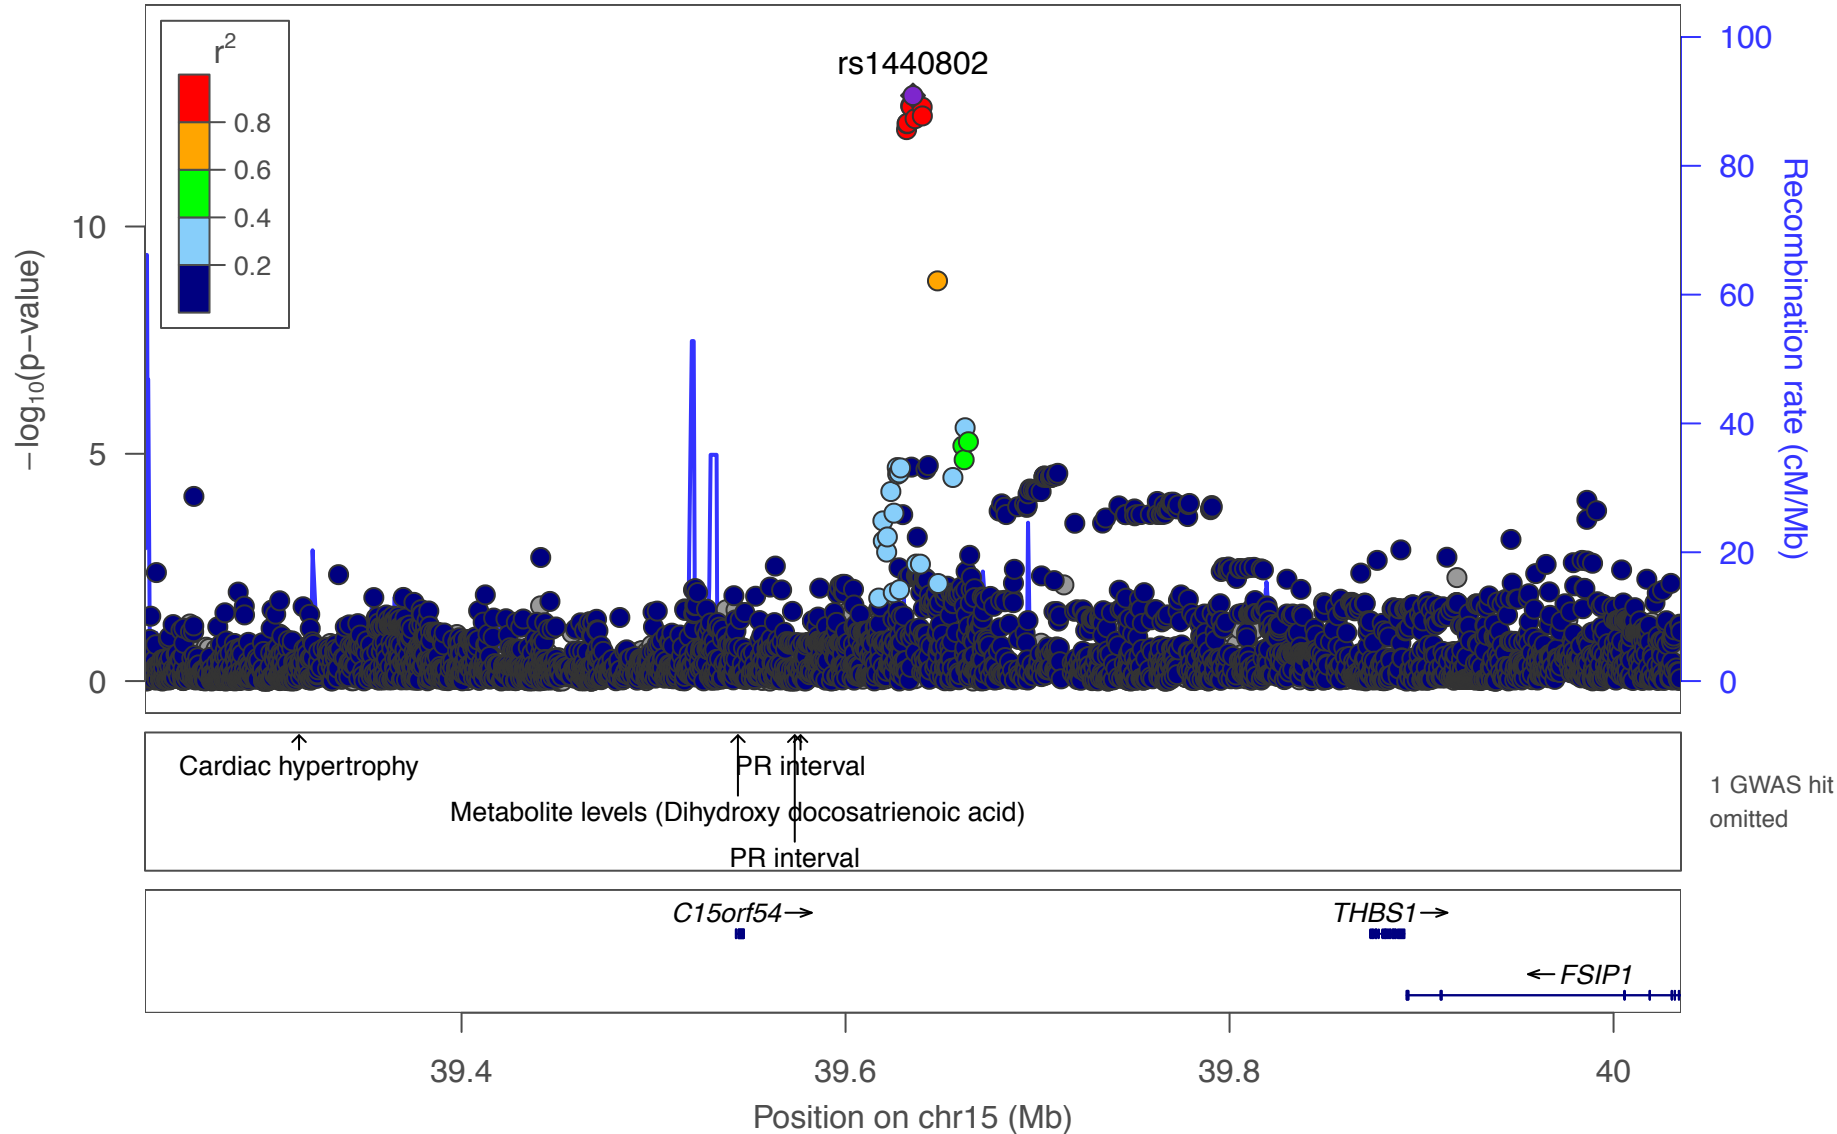

date: Thu Aug 17 18:55:29 2017

build: hg19

display range: chr15:39235124–40035124 [39235124–40035124]

hilite range: 0 – 0 [ 0 – 0 ]

reference SNP: chr15:39635124

number of SNPs plotted: 4346

min P.value: 1.32E–13 [chr15:39635124]

max P.value: 10E–1 [chr15:39573686]

omitted GWAS Hits: NA

## GWAS Catalog SNPs in Region

| <b>chr</b> | <b>pos (Mb)</b> | <b>trait</b>                                      | <b>snp</b> |
|------------|-----------------|---------------------------------------------------|------------|
| 15         | 39.31536        | Cardiac hypertrophy                               | rs12907914 |
| 15         | 39.34705        | Parental extreme longevity (95 years and older)   | rs78539969 |
| 15         | 39.54395        | Metabolite levels (Dihydroxy docosatrienoic acid) | rs17691453 |
| 15         | 39.57353        | PR interval                                       | rs12595668 |
| 15         | 39.57656        | PR interval                                       | rs746265   |

# FAST\_ROIs\_R\_precentral\_gyrus

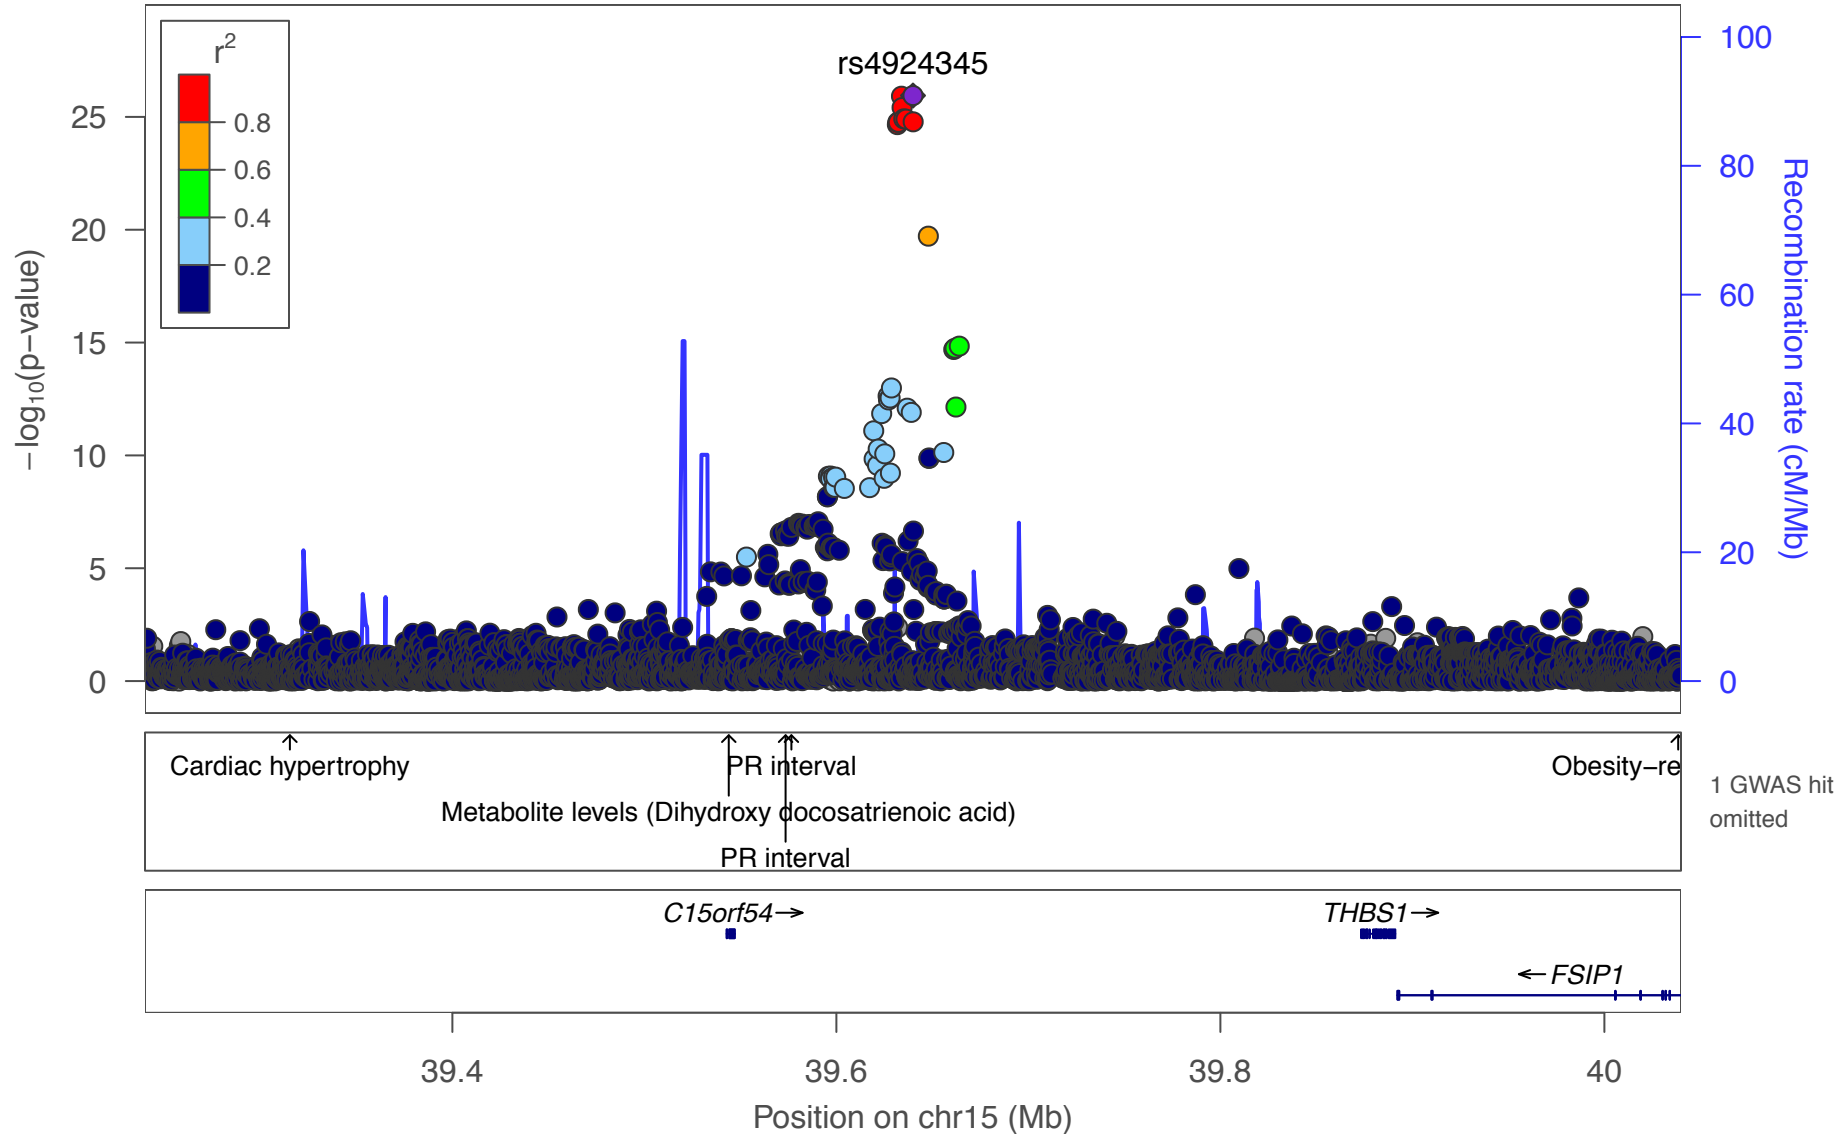

date: Thu Aug 17 18:55:45 2017

build: hg19

display range: chr15:39239898–40039898 [39239898–40039898]

hilite range: 0 – 0 [ 0 – 0 ]

reference SNP: chr15:39639898

number of SNPs plotted: 4344

min P.value: 1.13E–26 [chr15:39639898]

max P.value: 10E–1 [chr15:39865883]

omitted GWAS Hits: NA

## GWAS Catalog SNPs in Region

| <b>chr</b> | <b>pos (Mb)</b> | <b>trait</b>                                      | <b>snp</b> |
|------------|-----------------|---------------------------------------------------|------------|
| 15         | 39.31536        | Cardiac hypertrophy                               | rs12907914 |
| 15         | 39.34705        | Parental extreme longevity (95 years and older)   | rs78539969 |
| 15         | 39.54395        | Metabolite levels (Dihydroxy docosatrienoic acid) | rs17691453 |
| 15         | 39.57353        | PR interval                                       | rs12595668 |
| 15         | 39.57656        | PR interval                                       | rs746265   |
| 15         | 40.03843        | Obesity-related traits                            | rs8033957  |

# DKAtlas\_lh\_precentral\_area

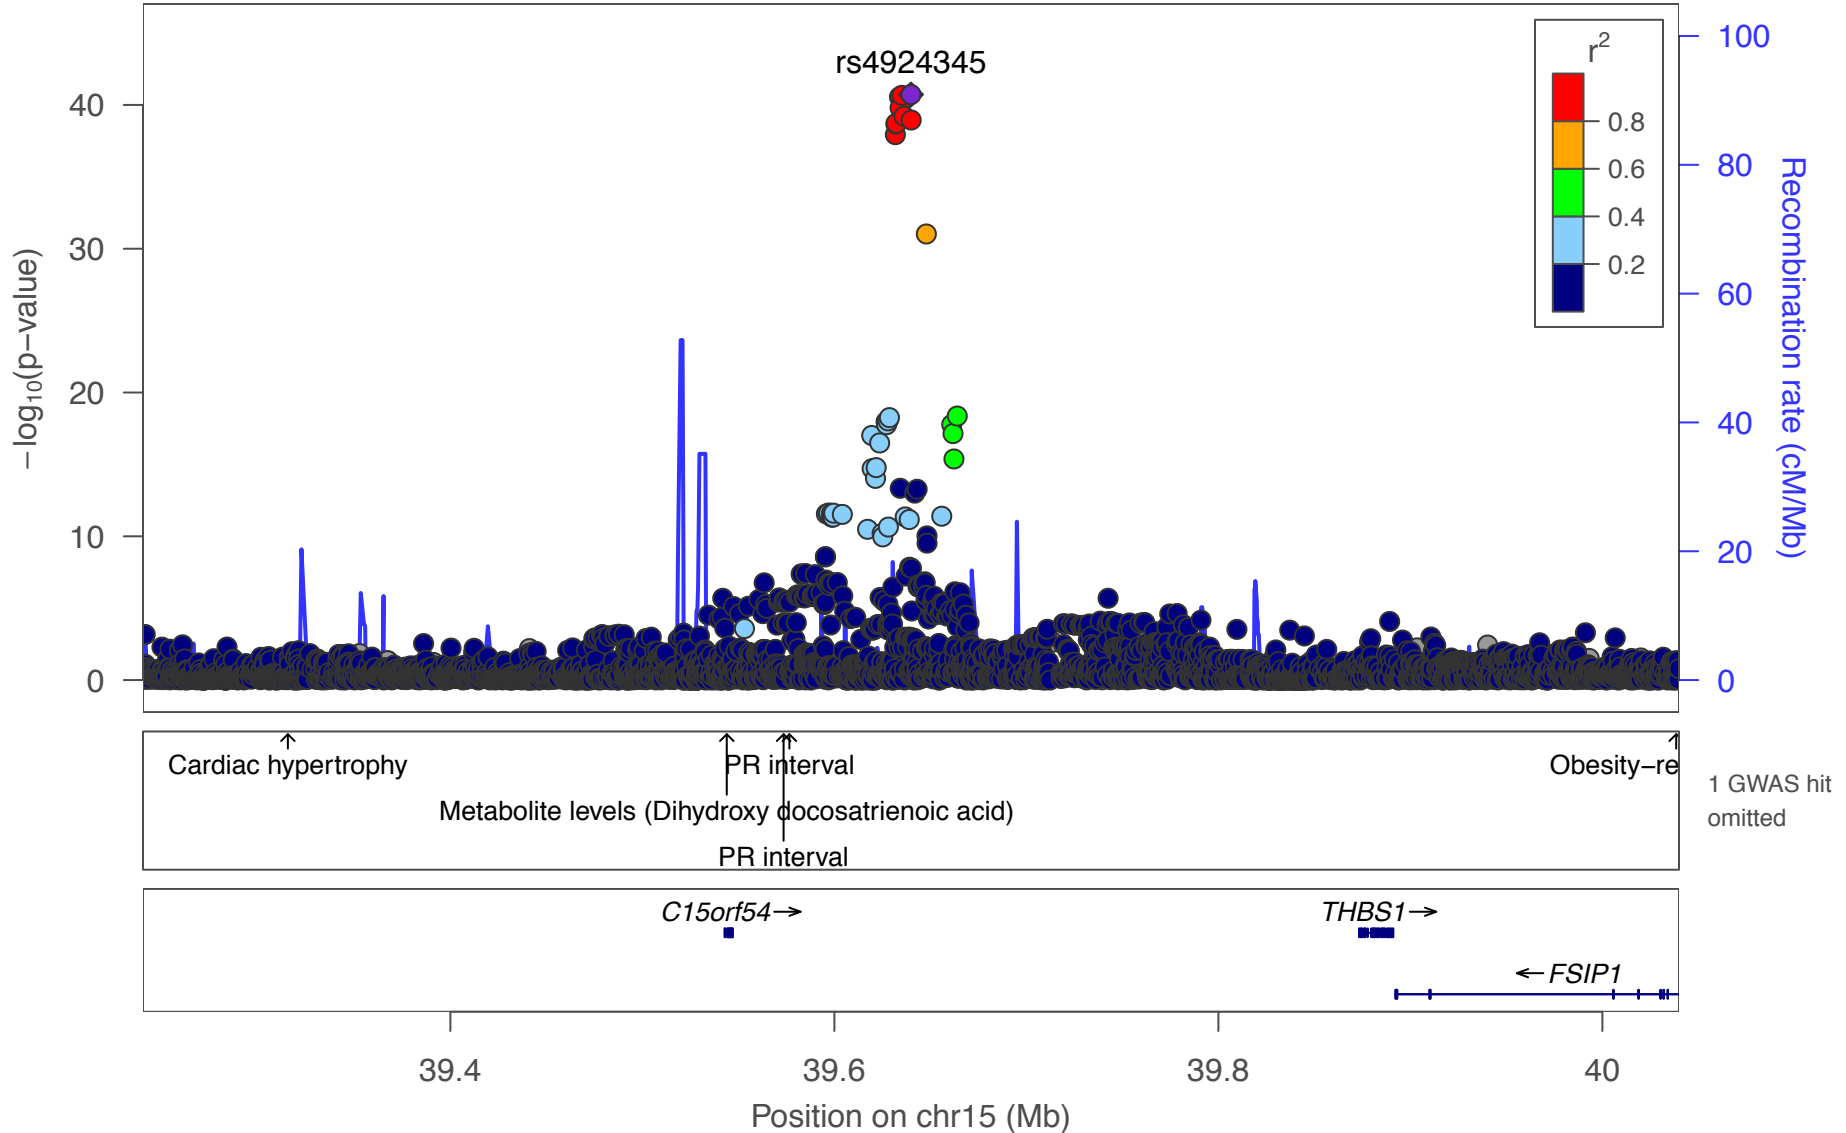



date: Thu Aug 17 18:53:41 2017

build: hg19

display range: chr15:39239898–40039898 [39239898–40039898]

hilite range: 0 – 0 [ 0 – 0 ]

reference SNP: chr15:39639898

number of SNPs plotted: 4344

min P.value: 1.89E–41 [chr15:39639898]

max P.value: 10E–1 [chr15:39844150]

omitted GWAS Hits: NA

## GWAS Catalog SNPs in Region

| <b>chr</b> | <b>pos (Mb)</b> | <b>trait</b>                                      | <b>snp</b> |
|------------|-----------------|---------------------------------------------------|------------|
| 15         | 39.31536        | Cardiac hypertrophy                               | rs12907914 |
| 15         | 39.34705        | Parental extreme longevity (95 years and older)   | rs78539969 |
| 15         | 39.54395        | Metabolite levels (Dihydroxy docosatrienoic acid) | rs17691453 |
| 15         | 39.57353        | PR interval                                       | rs12595668 |
| 15         | 39.57656        | PR interval                                       | rs746265   |
| 15         | 40.03843        | Obesity-related traits                            | rs8033957  |

# a2009s\_lh\_GandS\_subcentral\_area

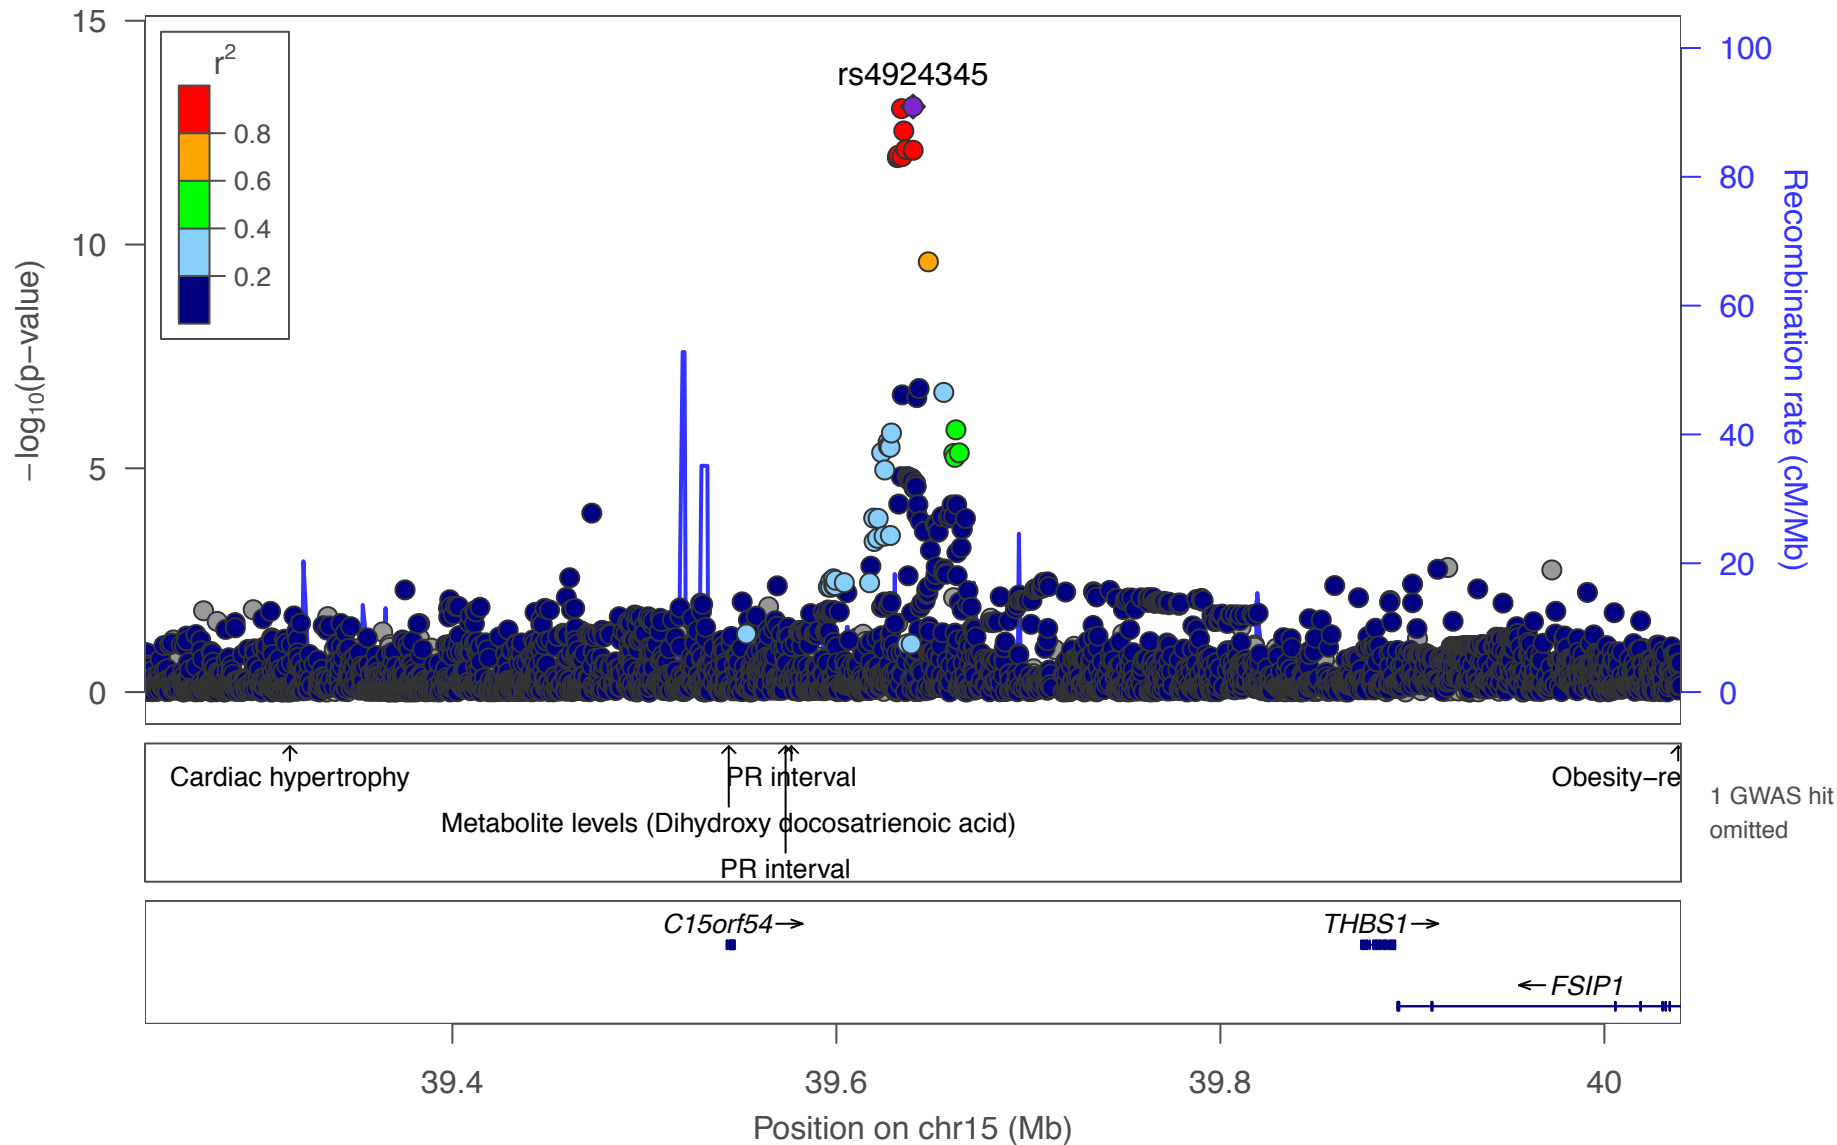

date: Thu Aug 17 18:48:08 2017

build: hg19

display range: chr15:39239898–40039898 [39239898–40039898]

hilite range: 0 – 0 [ 0 – 0 ]

reference SNP: chr15:39639898

number of SNPs plotted: 4344

min P.value: 8.26E–14 [chr15:39639898]

max P.value: 10E–1 [chr15:39555303]

omitted GWAS Hits: NA

## GWAS Catalog SNPs in Region

| <b>chr</b> | <b>pos (Mb)</b> | <b>trait</b>                                      | <b>snp</b> |
|------------|-----------------|---------------------------------------------------|------------|
| 15         | 39.31536        | Cardiac hypertrophy                               | rs12907914 |
| 15         | 39.34705        | Parental extreme longevity (95 years and older)   | rs78539969 |
| 15         | 39.54395        | Metabolite levels (Dihydroxy docosatrienoic acid) | rs17691453 |
| 15         | 39.57353        | PR interval                                       | rs12595668 |
| 15         | 39.57656        | PR interval                                       | rs746265   |
| 15         | 40.03843        | Obesity-related traits                            | rs8033957  |

# a2009s\_lh\_G\_precentral\_area

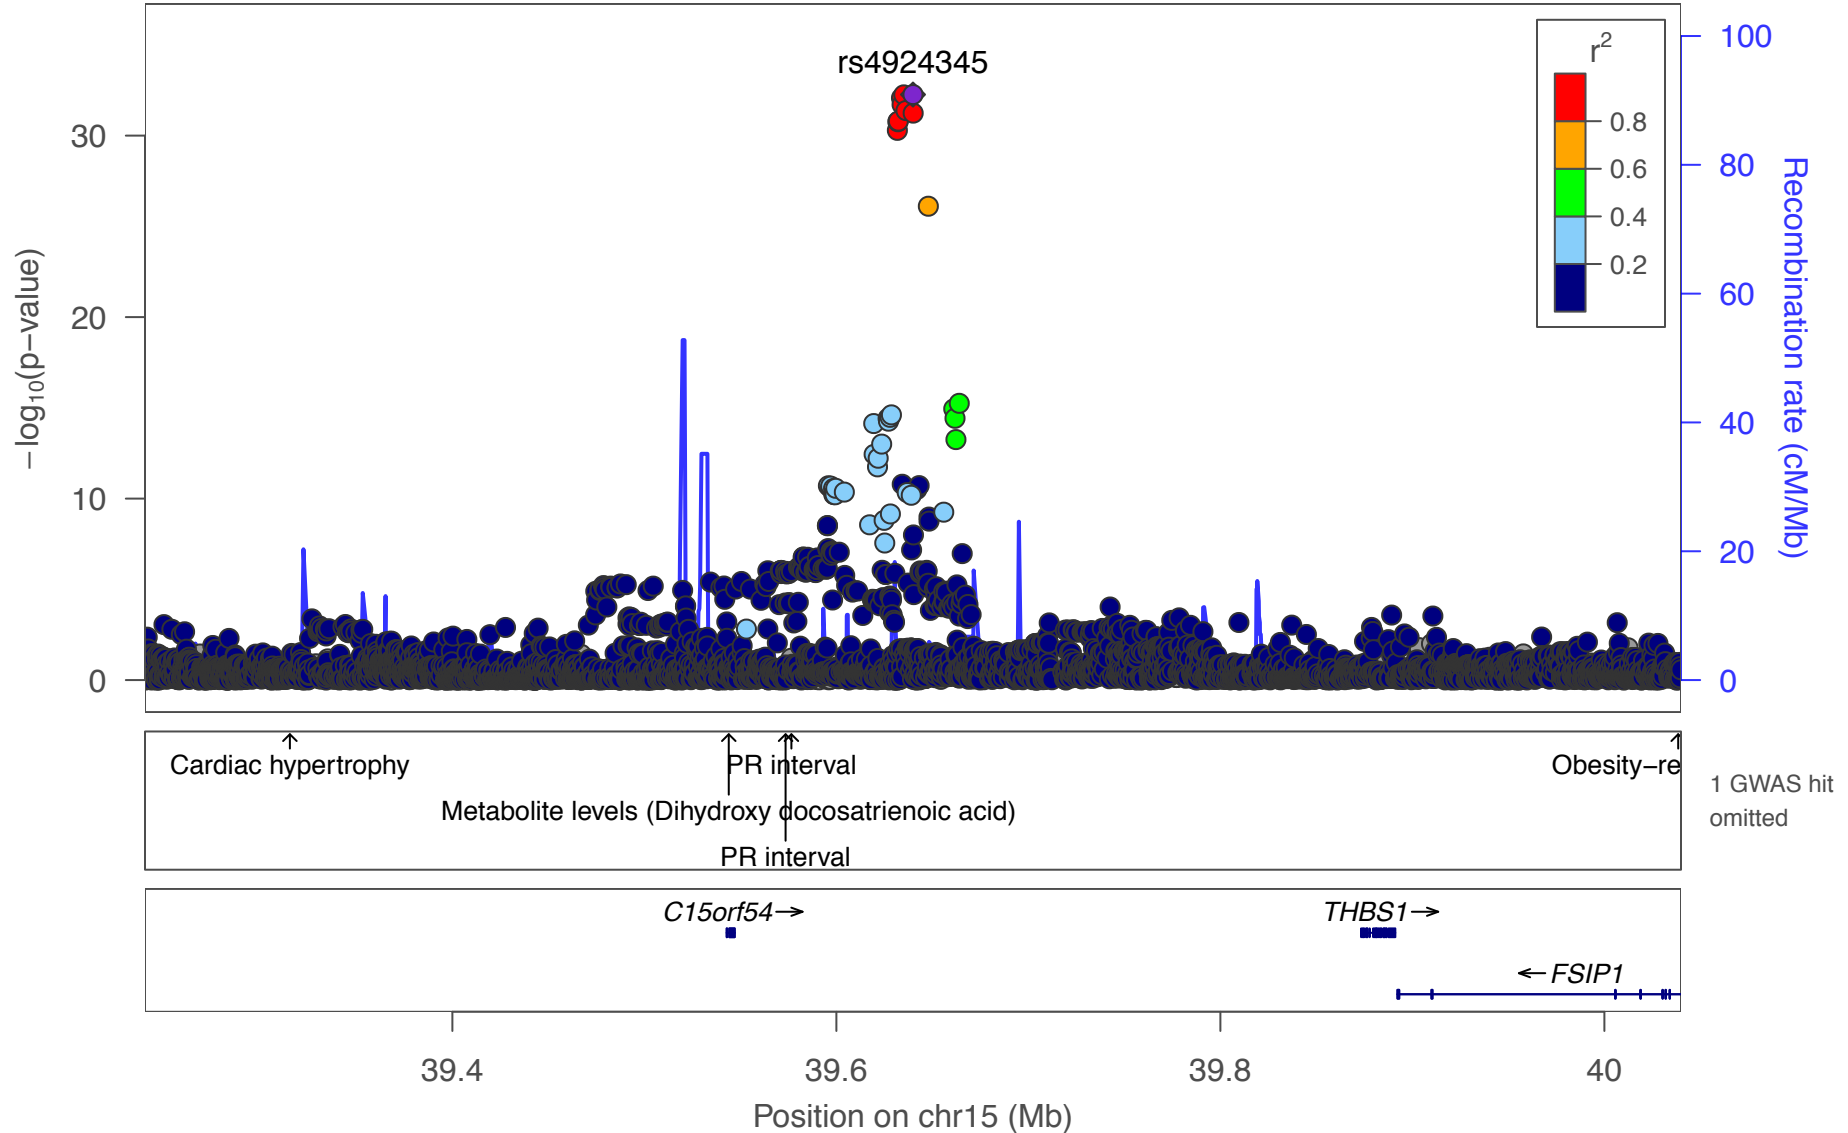

date: Thu Aug 17 18:57:11 2017

build: hg19

display range: chr15:39239898–40039898 [39239898–40039898]

hilite range: 0 – 0 [ 0 – 0 ]

reference SNP: chr15:39639898

number of SNPs plotted: 4344

min P.value: 5.47E–33 [chr15:39639898]

max P.value: 10E–1 [chr15:39703982]

omitted GWAS Hits: NA

## GWAS Catalog SNPs in Region

| <b>chr</b> | <b>pos (Mb)</b> | <b>trait</b>                                      | <b>snp</b> |
|------------|-----------------|---------------------------------------------------|------------|
| 15         | 39.31536        | Cardiac hypertrophy                               | rs12907914 |
| 15         | 39.34705        | Parental extreme longevity (95 years and older)   | rs78539969 |
| 15         | 39.54395        | Metabolite levels (Dihydroxy docosatrienoic acid) | rs17691453 |
| 15         | 39.57353        | PR interval                                       | rs12595668 |
| 15         | 39.57656        | PR interval                                       | rs746265   |
| 15         | 40.03843        | Obesity-related traits                            | rs8033957  |



# a2009s\_lh\_S\_central\_area

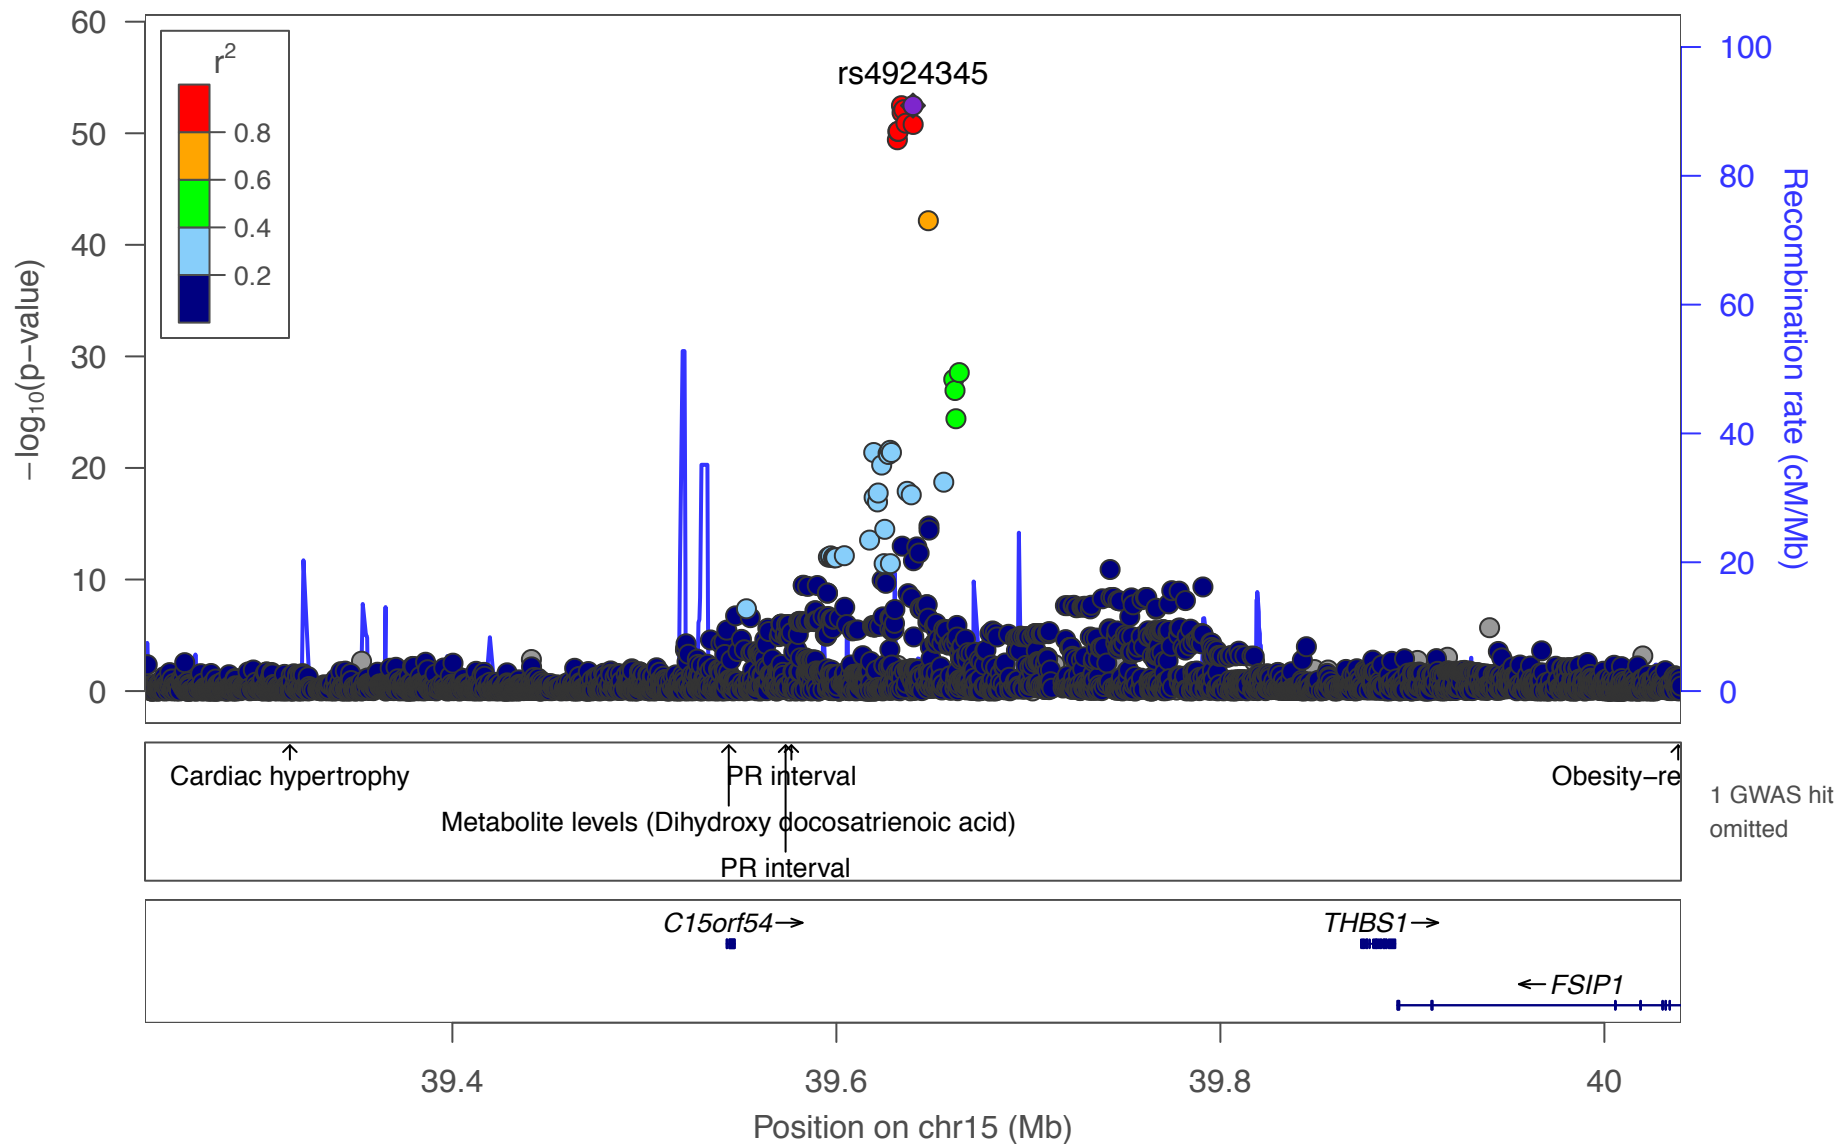

date: Thu Aug 17 18:53:27 2017

build: hg19

display range: chr15:39239898–40039898 [39239898–40039898]

hilite range: 0 – 0 [ 0 – 0 ]

reference SNP: chr15:39639898

number of SNPs plotted: 4344

min P.value: 3.27E–53 [chr15:39639898]

max P.value: 10E–1 [chr15:39282979]

omitted GWAS Hits: NA

## GWAS Catalog SNPs in Region

| <b>chr</b> | <b>pos (Mb)</b> | <b>trait</b>                                      | <b>snp</b> |
|------------|-----------------|---------------------------------------------------|------------|
| 15         | 39.31536        | Cardiac hypertrophy                               | rs12907914 |
| 15         | 39.34705        | Parental extreme longevity (95 years and older)   | rs78539969 |
| 15         | 39.54395        | Metabolite levels (Dihydroxy docosatrienoic acid) | rs17691453 |
| 15         | 39.57353        | PR interval                                       | rs12595668 |
| 15         | 39.57656        | PR interval                                       | rs746265   |
| 15         | 40.03843        | Obesity-related traits                            | rs8033957  |

# DKAtlas\_rh\_precentral\_area

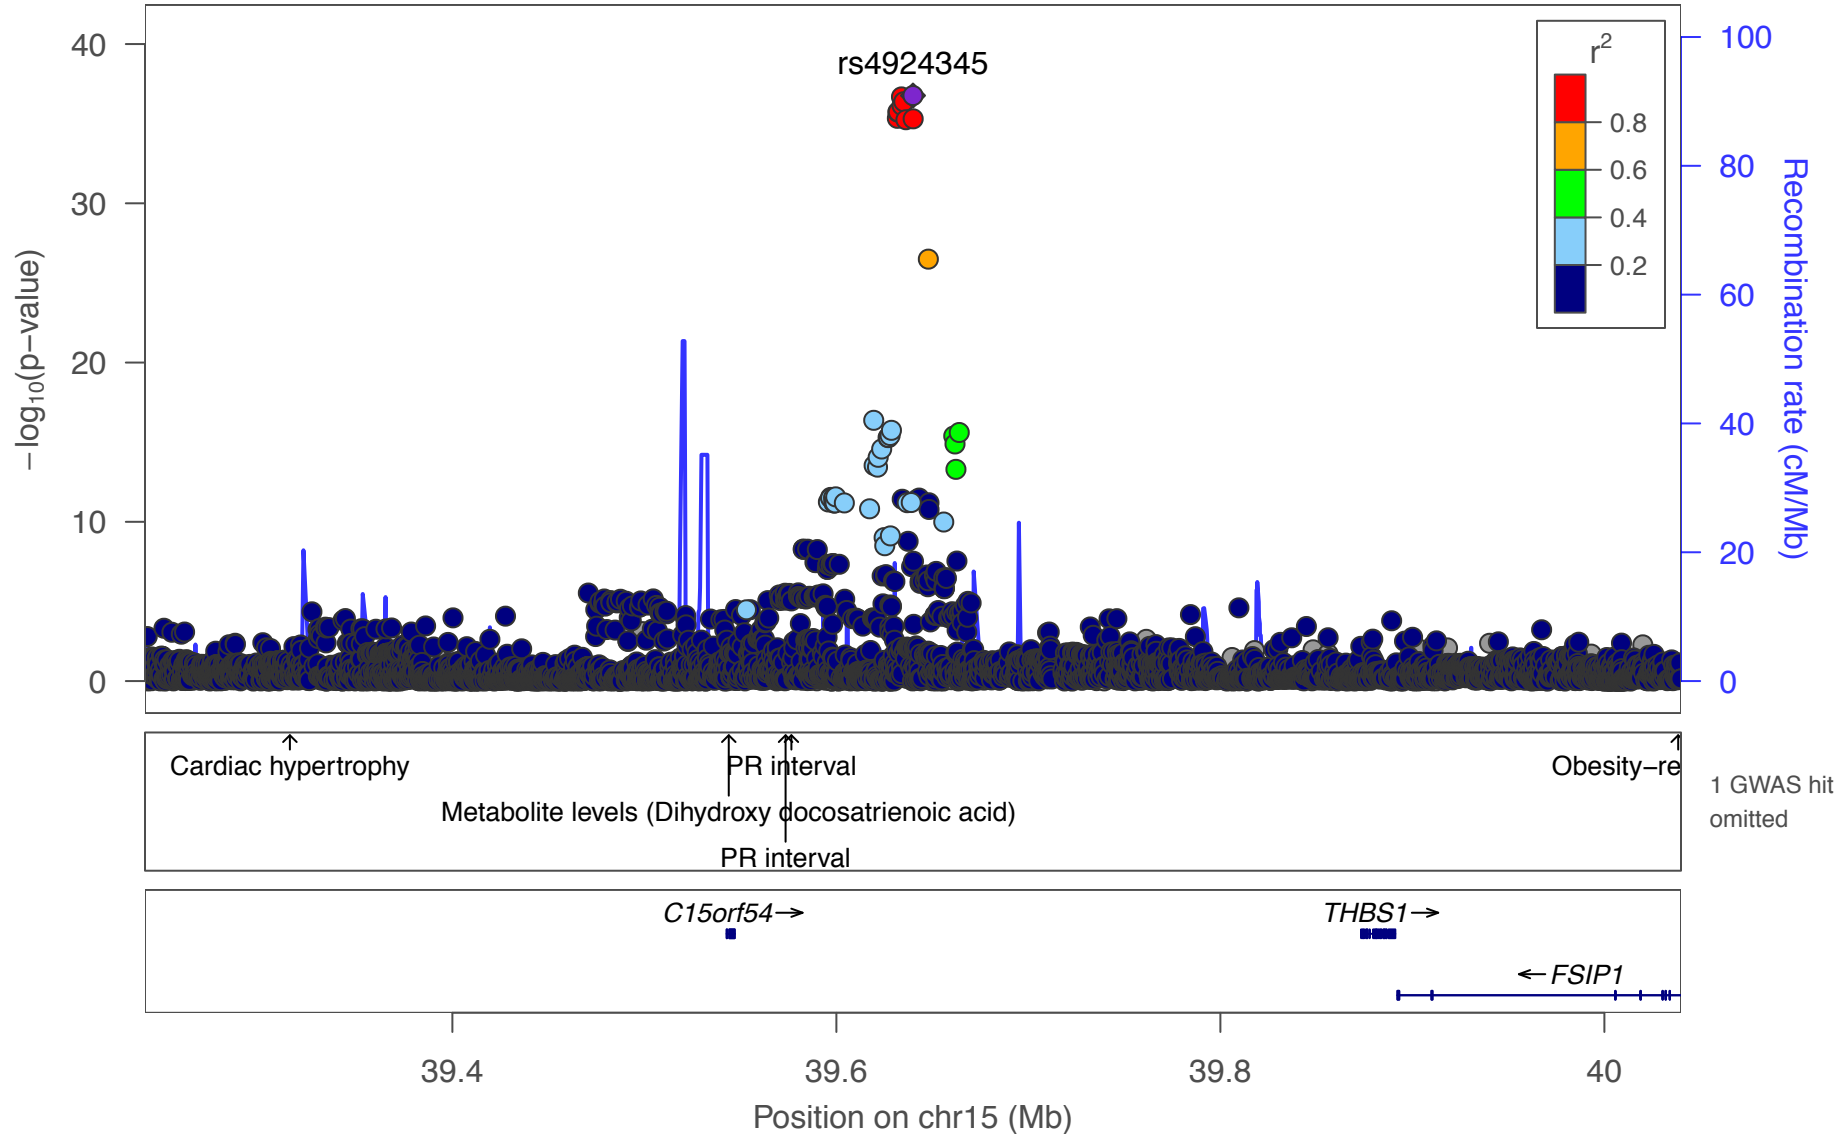

date: Thu Aug 17 18:57:12 2017

build: hg19

display range: chr15:39239898–40039898 [39239898–40039898]

hilite range: 0 – 0 [ 0 – 0 ]

reference SNP: chr15:39639898

number of SNPs plotted: 4344

min P.value: 1.71E–37 [chr15:39639898]

max P.value: 10E–1 [chr15:39334288]

omitted GWAS Hits: NA

## GWAS Catalog SNPs in Region

| <b>chr</b> | <b>pos (Mb)</b> | <b>trait</b>                                      | <b>snp</b> |
|------------|-----------------|---------------------------------------------------|------------|
| 15         | 39.31536        | Cardiac hypertrophy                               | rs12907914 |
| 15         | 39.34705        | Parental extreme longevity (95 years and older)   | rs78539969 |
| 15         | 39.54395        | Metabolite levels (Dihydroxy docosatrienoic acid) | rs17691453 |
| 15         | 39.57353        | PR interval                                       | rs12595668 |
| 15         | 39.57656        | PR interval                                       | rs746265   |
| 15         | 40.03843        | Obesity-related traits                            | rs8033957  |

# a2009s\_rh\_G\_precentral\_area

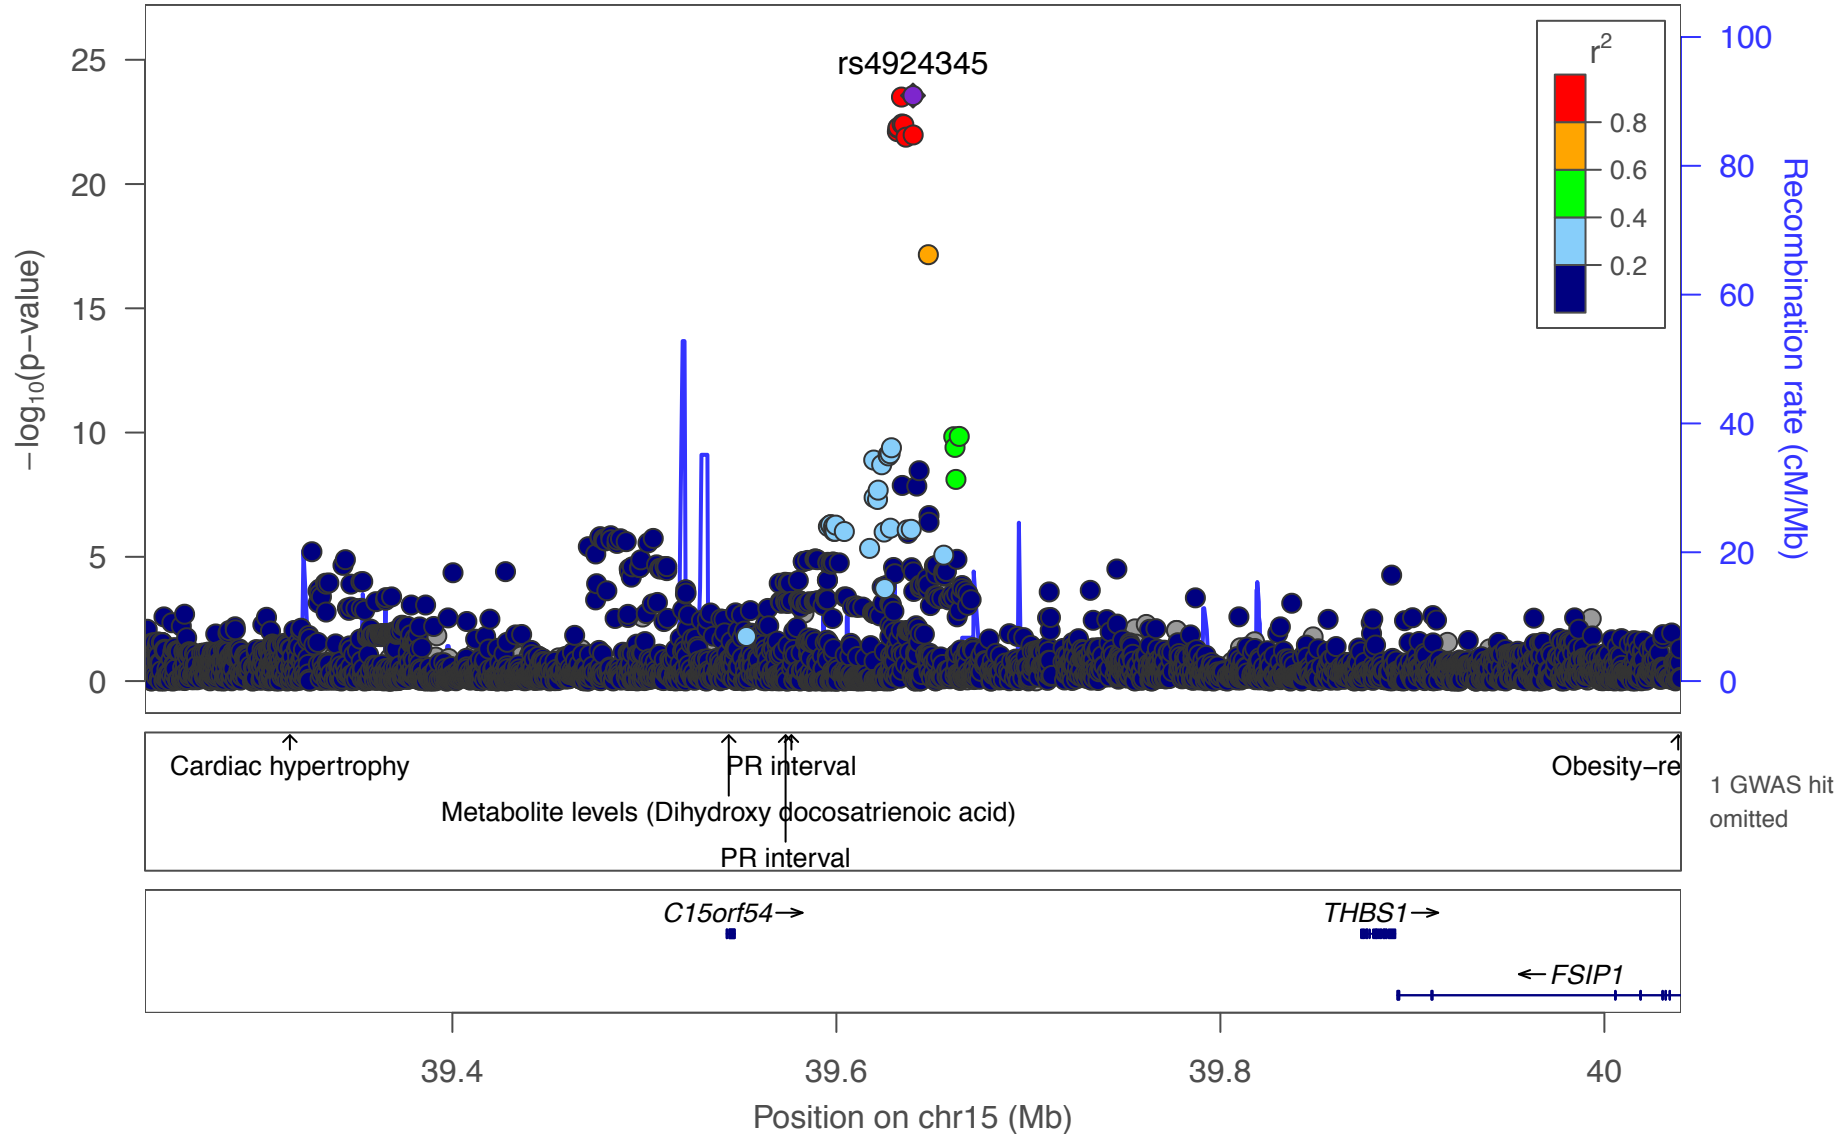

date: Thu Aug 17 18:53:34 2017

build: hg19

display range: chr15:39239898–40039898 [39239898–40039898]

hilite range: 0 – 0 [ 0 – 0 ]

reference SNP: chr15:39639898

number of SNPs plotted: 4344

min P.value: 2.75E–24 [chr15:39639898]

max P.value: 9.99E–1 [chr15:39600386]

omitted GWAS Hits: NA



## GWAS Catalog SNPs in Region

| <b>chr</b> | <b>pos (Mb)</b> | <b>trait</b>                                      | <b>snp</b> |
|------------|-----------------|---------------------------------------------------|------------|
| 15         | 39.31536        | Cardiac hypertrophy                               | rs12907914 |
| 15         | 39.34705        | Parental extreme longevity (95 years and older)   | rs78539969 |
| 15         | 39.54395        | Metabolite levels (Dihydroxy docosatrienoic acid) | rs17691453 |
| 15         | 39.57353        | PR interval                                       | rs12595668 |
| 15         | 39.57656        | PR interval                                       | rs746265   |
| 15         | 40.03843        | Obesity-related traits                            | rs8033957  |

# a2009s\_rh\_S\_central\_area

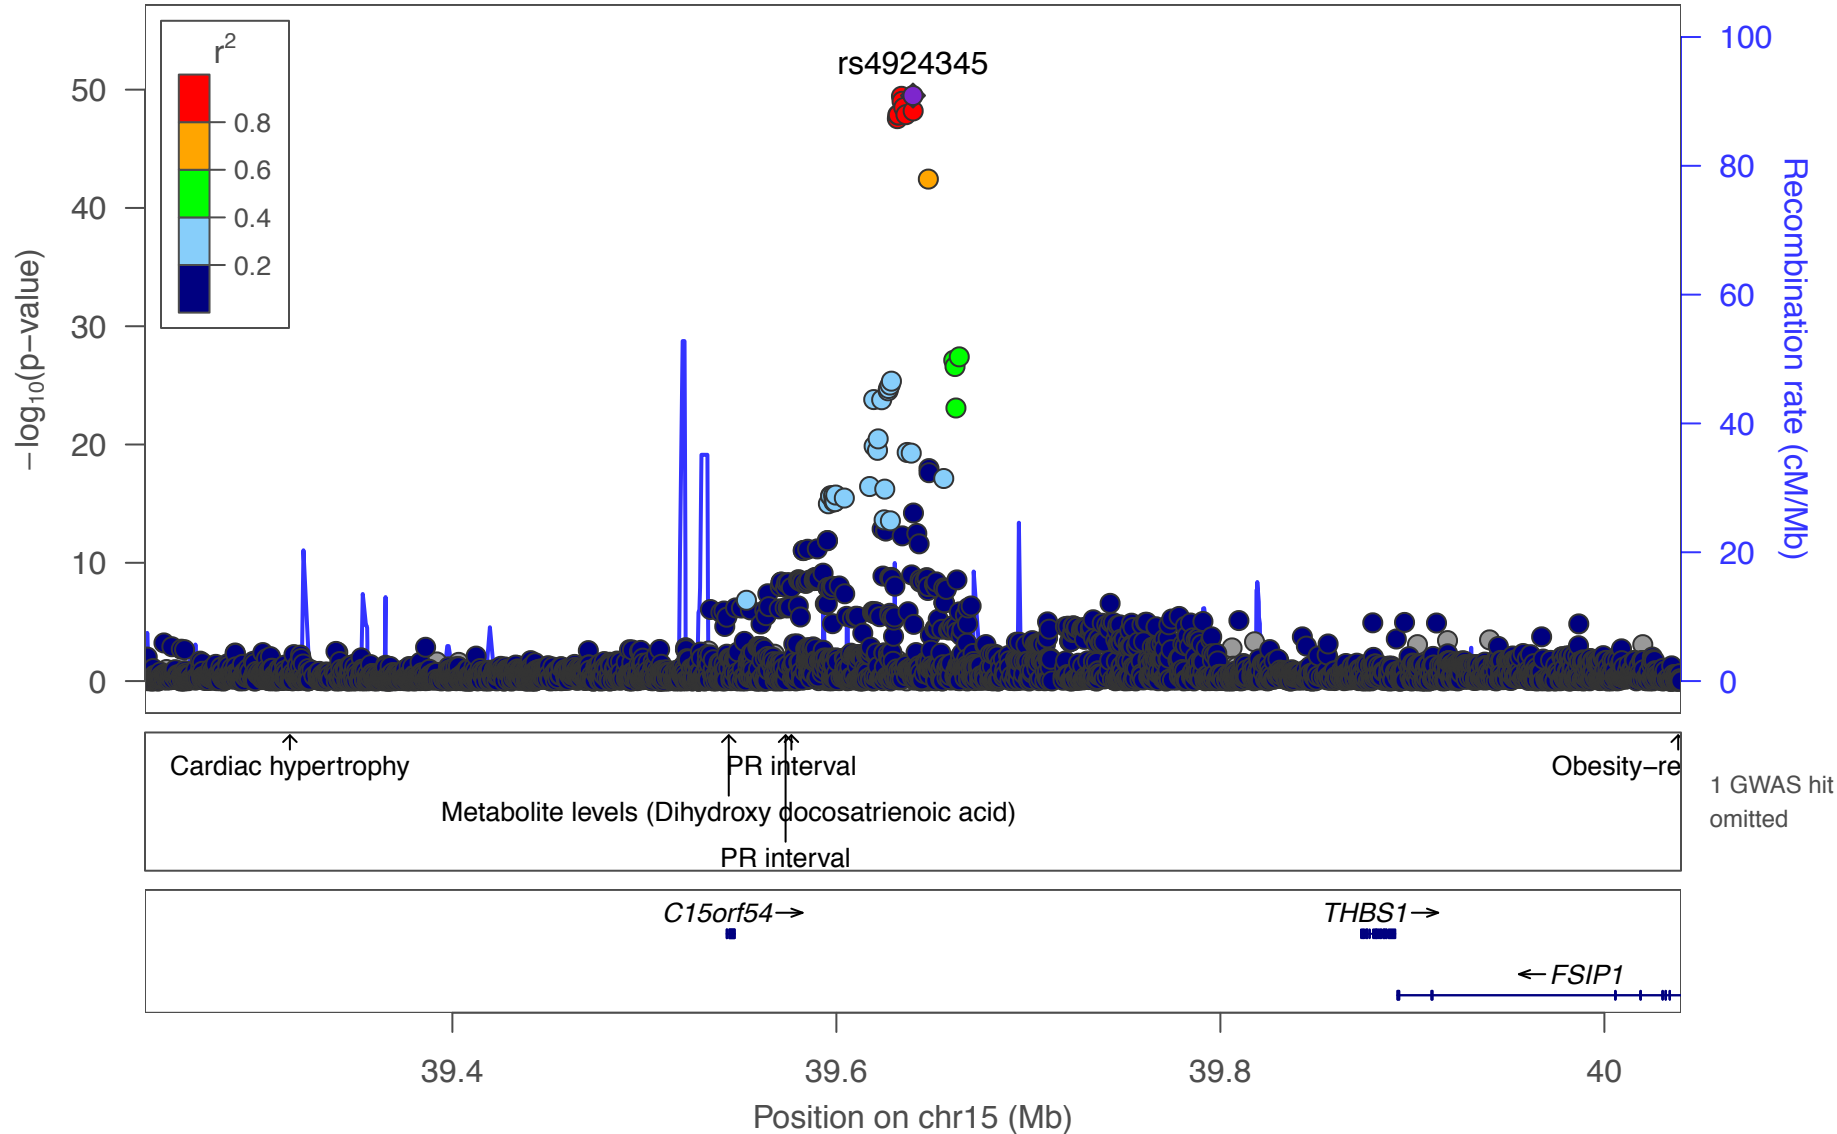

date: Thu Aug 17 18:53:26 2017

build: hg19

display range: chr15:39239898–40039898 [39239898–40039898]

hilite range: 0 – 0 [ 0 – 0 ]

reference SNP: chr15:39639898

number of SNPs plotted: 4344

min P.value: 3.15E–50 [chr15:39639898]

max P.value: 10E–1 [chr15:39507763]

omitted GWAS Hits: NA

## GWAS Catalog SNPs in Region

| <b>chr</b> | <b>pos (Mb)</b> | <b>trait</b>                                      | <b>snp</b> |
|------------|-----------------|---------------------------------------------------|------------|
| 15         | 39.31536        | Cardiac hypertrophy                               | rs12907914 |
| 15         | 39.34705        | Parental extreme longevity (95 years and older)   | rs78539969 |
| 15         | 39.54395        | Metabolite levels (Dihydroxy docosatrienoic acid) | rs17691453 |
| 15         | 39.57353        | PR interval                                       | rs12595668 |
| 15         | 39.57656        | PR interval                                       | rs746265   |
| 15         | 40.03843        | Obesity-related traits                            | rs8033957  |

# volume\_4th-Ventricle

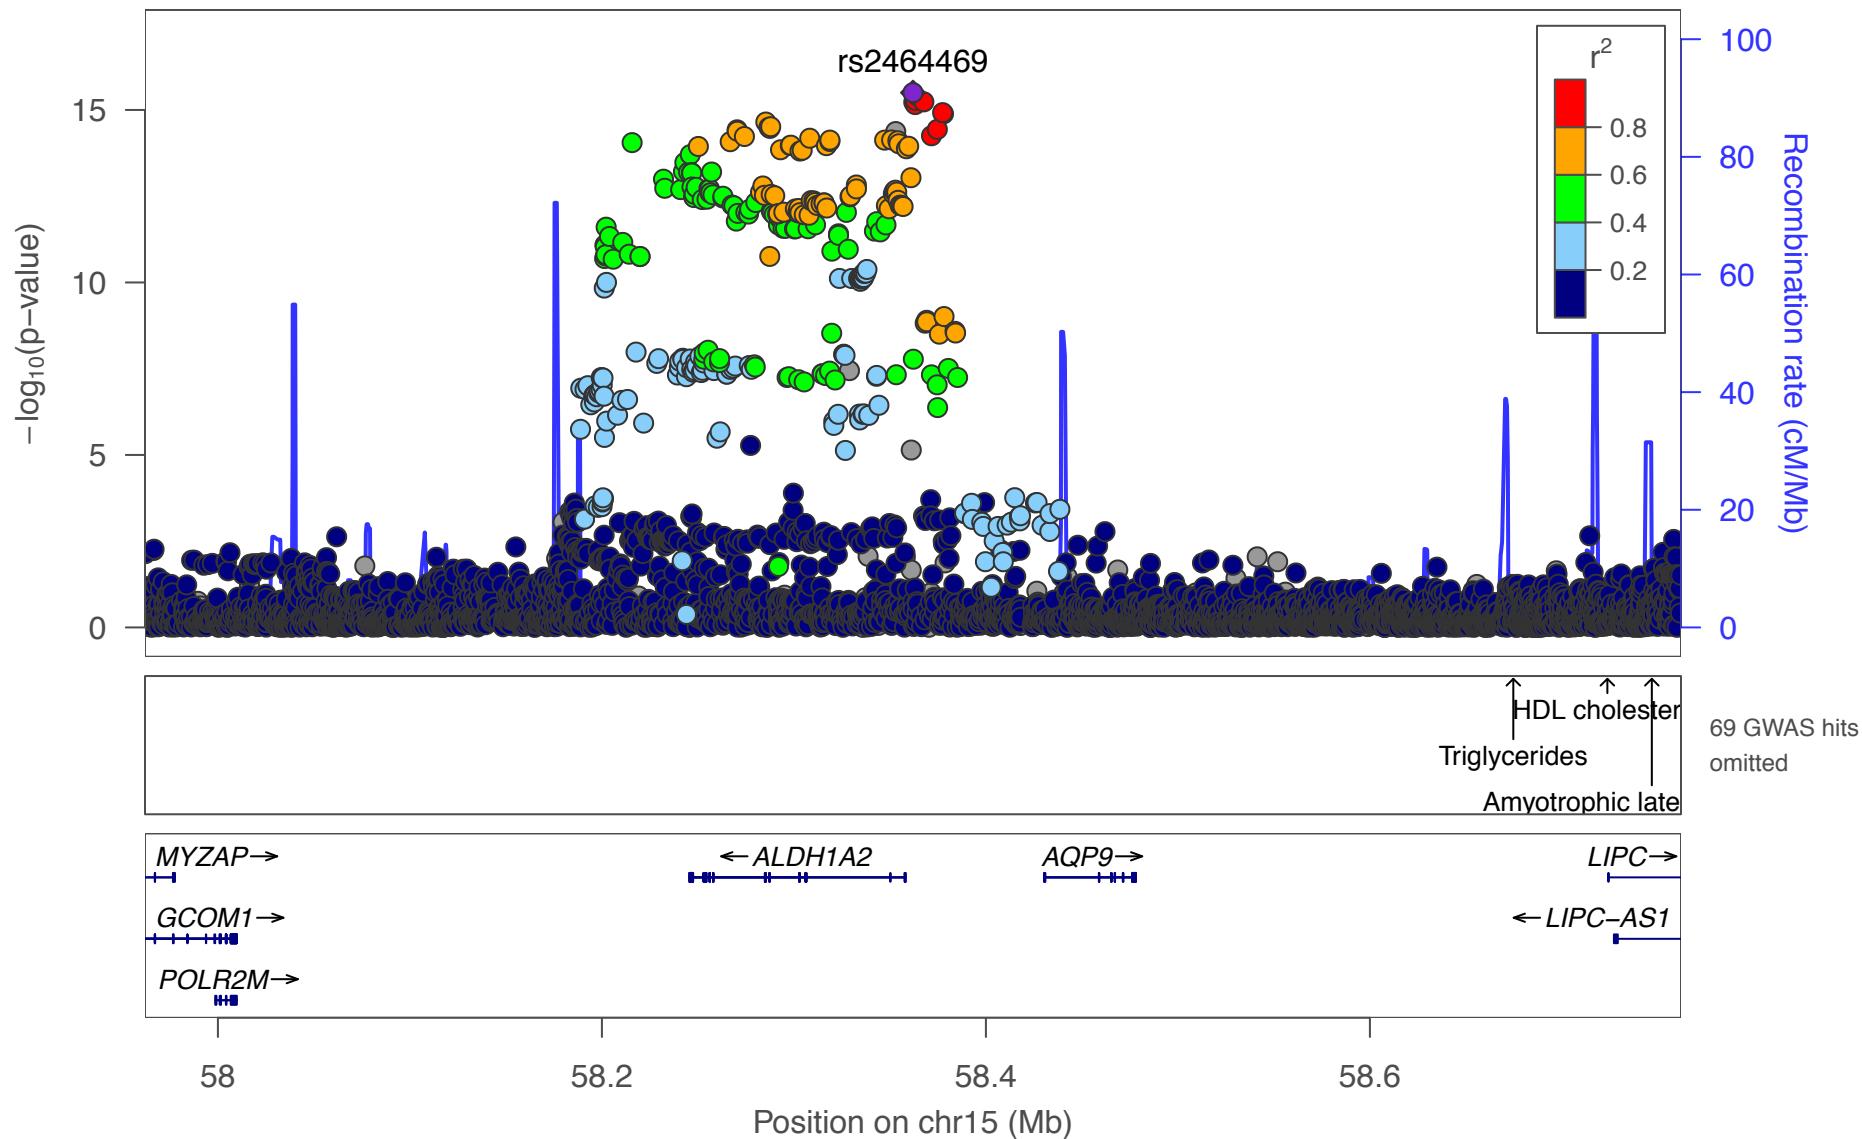

date: Thu Aug 17 19:01:30 2017

build: hg19

display range: chr15:57962025–58762025 [57962025–58762025]

hilite range: 0 – 0 [ 0 – 0 ]

reference SNP: chr15:58362025

number of SNPs plotted: 4625

min P.value: 3.16E–16 [chr15:58362025]

max P.value: 10E–1 [chr15:58464691]

omitted GWAS Hits: NA, NA

omitted GWAS Hits: NA, NA  
Make more plots at <http://csg.sph.umich.edu/locuszoom/>

omitted GWAS Hits: NA, NA

GWAS Catalog SNPs in Region

| chr | pos (Mb) | trait                                                                                 | snp         |
|-----|----------|---------------------------------------------------------------------------------------|-------------|
| 15  | 58.00976 | Seasonality                                                                           | rs1808478   |
| 15  | 58.03386 | Diisocyanate-induced asthma                                                           | rs487836    |
| 15  | 58.08062 | Myopia (pathological)                                                                 | rs1559777   |
| 15  | 58.08237 | Diisocyanate-induced asthma                                                           | rs566767    |
| 15  | 58.08537 | Post bronchodilator FEV1/FVC ratio                                                    | rs114831632 |
| 15  | 58.08889 | Post bronchodilator FEV1/FVC ratio                                                    | rs149074315 |
| 15  | 58.08933 | Post bronchodilator FEV1/FVC ratio                                                    | rs140526800 |
| 15  | 58.10059 | Post bronchodilator FEV1/FVC ratio                                                    | rs145330511 |
| 15  | 58.10186 | Post bronchodilator FEV1/FVC ratio                                                    | rs140949321 |
| 15  | 58.10198 | Post bronchodilator FEV1/FVC ratio                                                    | rs148246786 |
| 15  | 58.10224 | Post bronchodilator FEV1/FVC ratio                                                    | rs7164035   |
| 15  | 58.10423 | Post bronchodilator FEV1/FVC ratio                                                    | rs146071159 |
| 15  | 58.10480 | Post bronchodilator FEV1/FVC ratio                                                    | rs113870173 |
| 15  | 58.10503 | Post bronchodilator FEV1/FVC ratio                                                    | rs115942227 |
| 15  | 58.21341 | Hypertension                                                                          | rs1550576   |
| 15  | 58.24680 | Osteoarthritis (hand, severe)                                                         | rs3204689   |
| 15  | 58.25311 | Barrett's esophagus                                                                   | rs3784262   |
| 15  | 58.25311 | Digestive system disease (Barrett's esophagus and esophageal adenocarcinoma combined) | rs3784262   |
| 15  | 58.26742 | Barrett's esophagus                                                                   | rs66725070  |
| 15  | 58.36203 | Barrett's esophagus or Esophageal adenocarcinoma                                      | rs2464469   |
| 15  | 58.47198 | Metabolite levels                                                                     | rs16939881  |

GWAS Catalog SNPs in Region

| chr | pos (Mb) | trait                                     | snp        |
|-----|----------|-------------------------------------------|------------|
| 15  | 58.55169 | Stroke                                    | rs4471613  |
| 15  | 58.55169 | Ischemic stroke                           | rs4471613  |
| 15  | 58.57497 | Metabolite levels (lipoprotein measures)  | rs56050415 |
| 15  | 58.63558 | Cognitive performance                     | rs4775031  |
| 15  | 58.67177 | Cholesterol, total                        | rs1601935  |
| 15  | 58.67467 | Non–small cell lung cancer                | rs539901   |
| 15  | 58.67469 | Triglycerides                             | rs4775041  |
| 15  | 58.67469 | Metabolite levels                         | rs4775041  |
| 15  | 58.67469 | HDL cholesterol                           | rs4775041  |
| 15  | 58.67789 | Gout                                      | rs187775   |
| 15  | 58.67851 | HDL cholesterol                           | rs10468017 |
| 15  | 58.67851 | Cardiovascular disease risk factors       | rs10468017 |
| 15  | 58.67851 | Metabolic syndrome (bivariate traits)     | rs10468017 |
| 15  | 58.67851 | Age–related macular degeneration          | rs10468017 |
| 15  | 58.67851 | Phospholipid levels (plasma)              | rs10468017 |
| 15  | 58.67851 | Blood metabolite levels                   | rs10468017 |
| 15  | 58.68018 | HDL cholesterol                           | rs261291   |
| 15  | 58.68064 | Lipid metabolism phenotypes               | rs35853021 |
| 15  | 58.68095 | Metabolic syndrome (bivariate traits)     | rs2043085  |
| 15  | 58.68095 | Lipid traits                              | rs2043085  |
| 15  | 58.68095 | Advanced age–related macular degeneration | rs2043085  |



GWAS Catalog SNPs in Region

| chr | pos (Mb) | trait                                                            | snp        |
|-----|----------|------------------------------------------------------------------|------------|
| 15  | 58.68337 | HDL cholesterol                                                  | rs1532085  |
| 15  | 58.68337 | Cholesterol, total                                               | rs1532085  |
| 15  | 58.68337 | Triglycerides                                                    | rs1532085  |
| 15  | 58.68337 | Metabolic syndrome                                               | rs1532085  |
| 15  | 58.68337 | Lipid metabolism phenotypes                                      | rs1532085  |
| 15  | 58.68337 | Red blood cell traits                                            | rs1532085  |
| 15  | 58.68337 | Metabolite levels                                                | rs1532085  |
| 15  | 58.68337 | Metabolite levels (lipoprotein measures)                         | rs1532085  |
| 15  | 58.68788 | Age-related macular degeneration                                 | rs493258   |
| 15  | 58.68847 | Age-related macular degeneration                                 | rs920915   |
| 15  | 58.69402 | HDL cholesterol                                                  | rs16940212 |
| 15  | 58.71220 | Obesity-related traits                                           | rs11857380 |
| 15  | 58.72343 | HDL cholesterol                                                  | rs1077835  |
| 15  | 58.72343 | Triglycerides                                                    | rs1077835  |
| 15  | 58.72348 | Hematological and biochemical traits                             | rs1077834  |
| 15  | 58.72348 | C-reactive protein levels or HDL-cholesterol levels (pleiotropy) | rs1077834  |
| 15  | 58.72368 | HDL cholesterol                                                  | rs1800588  |
| 15  | 58.72368 | Triglycerides                                                    | rs1800588  |
| 15  | 58.72368 | Cholesterol, total                                               | rs1800588  |
| 15  | 58.72394 | Blood metabolite levels                                          | rs2070895  |
| 15  | 58.72394 | Advanced age-related macular degeneration                        | rs2070895  |

## GWAS Catalog SNPs in Region

| <b>chr</b> | <b>pos (Mb)</b> | <b>trait</b>                             | <b>snp</b> |
|------------|-----------------|------------------------------------------|------------|
| 15         | 58.72479        | HDL cholesterol                          | rs8034802  |
| 15         | 58.72674        | HDL cholesterol                          | rs261334   |
| 15         | 58.72674        | Metabolite levels (lipoprotein measures) | rs261334   |
| 15         | 58.73050        | Lipid traits                             | rs588136   |
| 15         | 58.73050        | Blood metabolite levels                  | rs588136   |
| 15         | 58.73064        | Alzheimer's disease (cognitive decline)  | rs17301739 |
| 15         | 58.73115        | Metabolite levels                        | rs261342   |
| 15         | 58.73842        | Schizophrenia                            | rs12914626 |
| 15         | 58.74683        | Amyotrophic lateral sclerosis            | rs3825776  |

# ProbtrackX\_ISOVF\_unc\_I

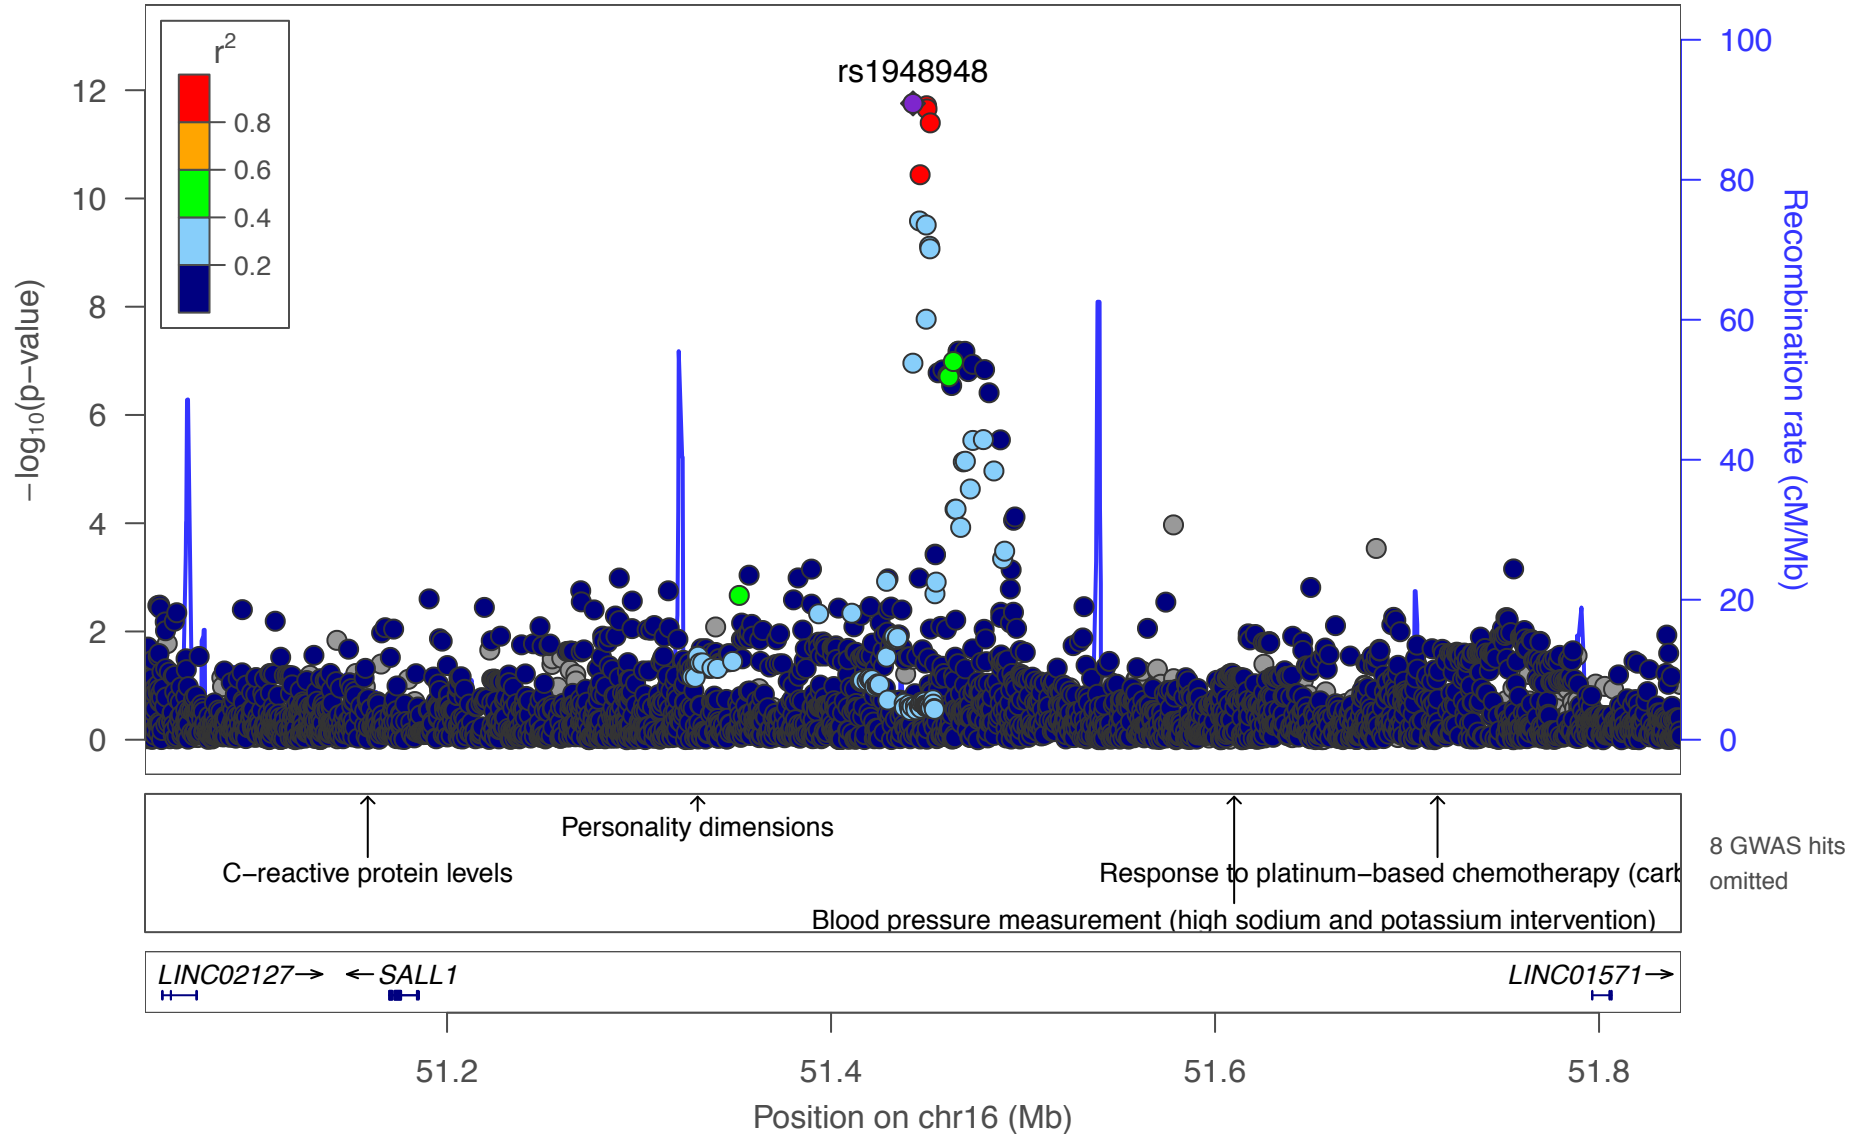

date: Thu Aug 17 19:11:22 2017

build: hg19

display range: chr16:51042679–51842679 [51042679–51842679]

hilite range: 0 – 0 [ 0 – 0 ]

reference SNP: chr16:51442679

number of SNPs plotted: 3808

min P.value: 1.75E–12 [chr16:51442679]

max P.value: 10E–1 [chr16:51602902]

omitted GWAS Hits: NA, NA

omitted GWAS Hits: NA, NA

omitted GWAS Hits: NA, NA

## GWAS Catalog SNPs in Region

| <b>chr</b> | <b>pos (Mb)</b> | <b>trait</b>                                                        | <b>snp</b>  |
|------------|-----------------|---------------------------------------------------------------------|-------------|
| 16         | 51.06153        | Post bronchodilator FEV1/FVC ratio                                  | rs147153117 |
| 16         | 51.15871        | C-reactive protein levels                                           | rs10521222  |
| 16         | 51.18373        | Educational attainment (years of education)                         | rs11643654  |
| 16         | 51.24549        | Weight loss (gastric bypass surgery)                                | rs7185923   |
| 16         | 51.33053        | Personality dimensions                                              | rs4131099   |
| 16         | 51.35748        | Left superior temporal gyrus thickness (schizophrenia interaction)  | rs17338034  |
| 16         | 51.42891        | Optic cup area                                                      | rs11646917  |
| 16         | 51.45829        | Optic disc parameters                                               | rs1362756   |
| 16         | 51.45829        | Optic disc area                                                     | rs1362756   |
| 16         | 51.48232        | Vertical cup-disc ratio                                             | rs1345467   |
| 16         | 51.60995        | Blood pressure measurement (high sodium and potassium intervention) | rs2030114   |
| 16         | 51.71587        | Response to platinum-based chemotherapy (carboplatin)               | rs1381451   |

# ProbtrackX\_MD\_unc\_r

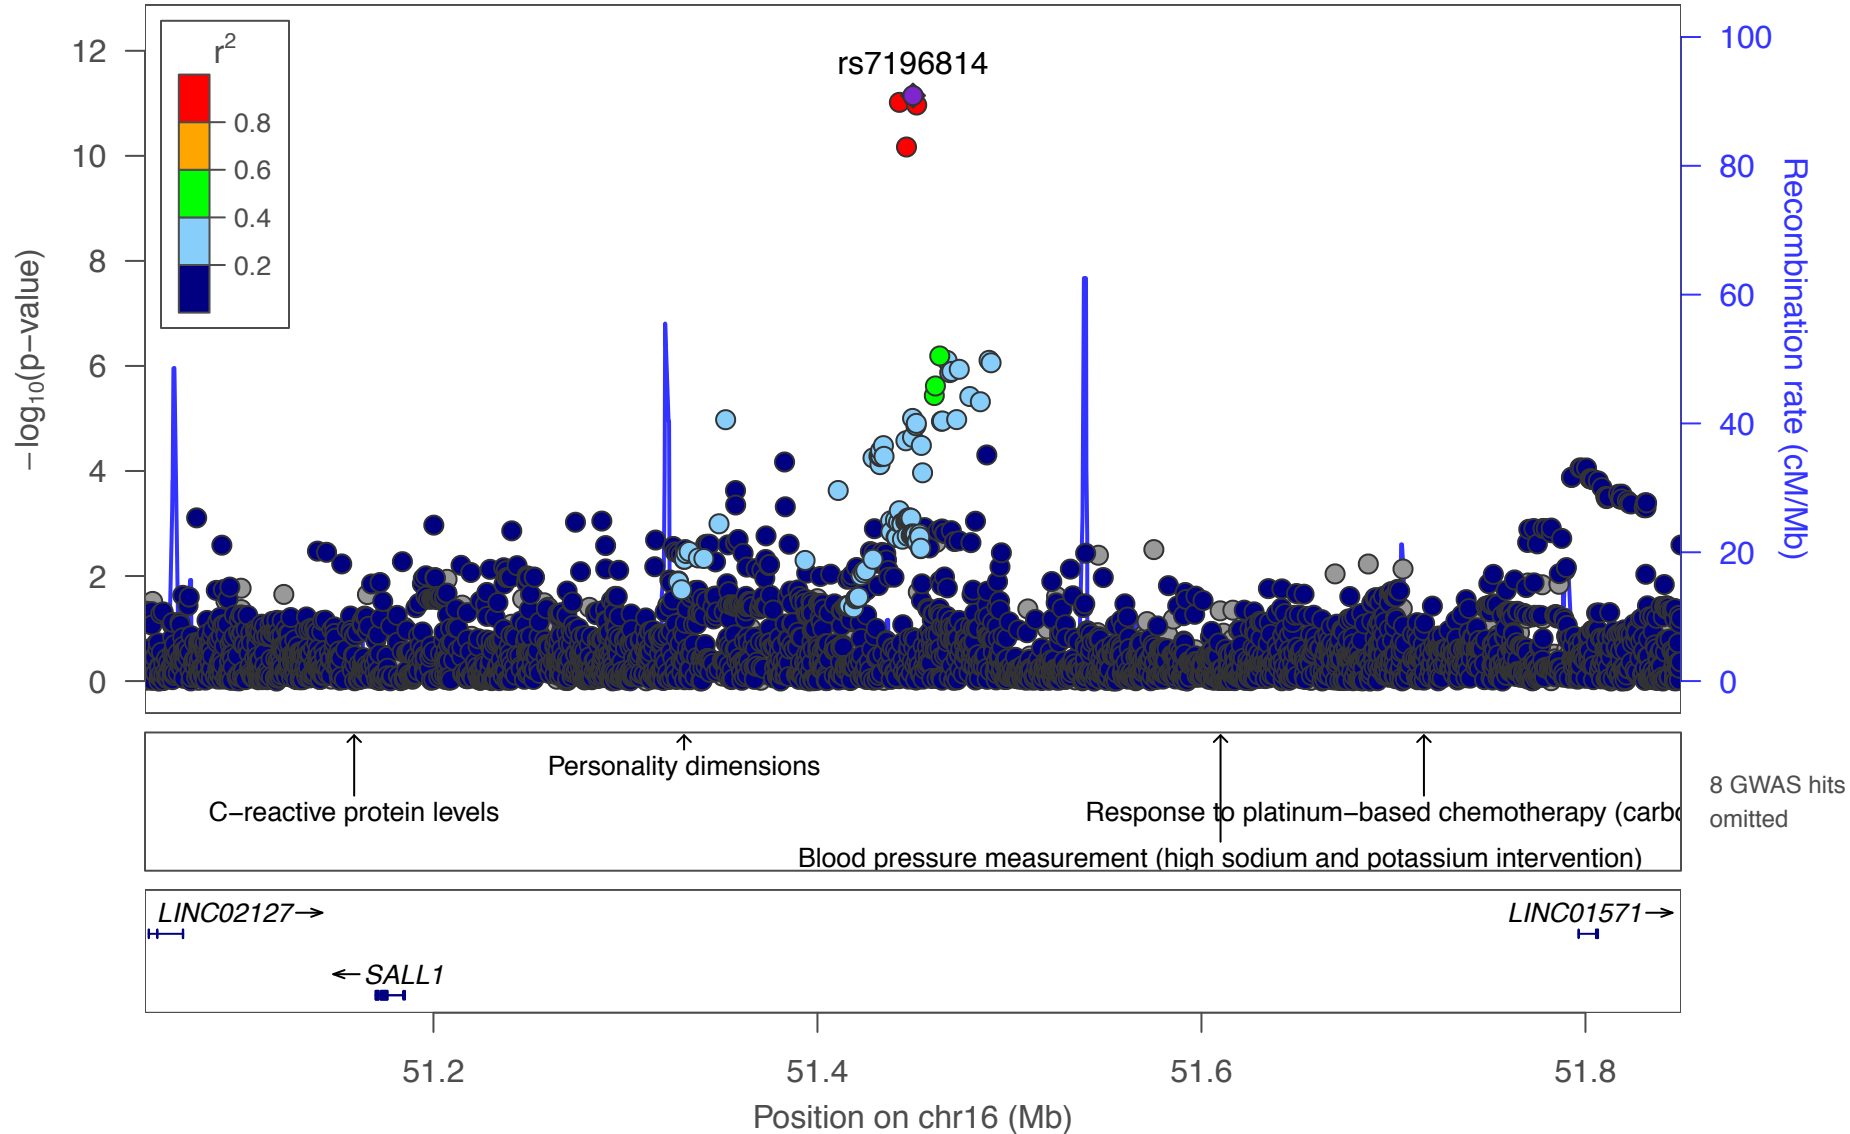

date: Thu Aug 17 19:11:44 2017

build: hg19

display range: chr16:51049760–51849760 [51049760–51849760]

hilite range: 0 – 0 [ 0 – 0 ]

reference SNP: chr16:51449760

number of SNPs plotted: 3808

min P.value: 7.11E–12 [chr16:51449760]

max P.value: 10E–1 [chr16:51818989]

omitted GWAS Hits: NA, NA

omitted GWAS Hits: NA, NA

omitted GWAS Hits: NA, NA

## GWAS Catalog SNPs in Region

| <b>chr</b> | <b>pos (Mb)</b> | <b>trait</b>                                                        | <b>snp</b>  |
|------------|-----------------|---------------------------------------------------------------------|-------------|
| 16         | 51.06153        | Post bronchodilator FEV1/FVC ratio                                  | rs147153117 |
| 16         | 51.15871        | C-reactive protein levels                                           | rs10521222  |
| 16         | 51.18373        | Educational attainment (years of education)                         | rs11643654  |
| 16         | 51.24549        | Weight loss (gastric bypass surgery)                                | rs7185923   |
| 16         | 51.33053        | Personality dimensions                                              | rs4131099   |
| 16         | 51.35748        | Left superior temporal gyrus thickness (schizophrenia interaction)  | rs17338034  |
| 16         | 51.42891        | Optic cup area                                                      | rs11646917  |
| 16         | 51.45829        | Optic disc parameters                                               | rs1362756   |
| 16         | 51.45829        | Optic disc area                                                     | rs1362756   |
| 16         | 51.48232        | Vertical cup-disc ratio                                             | rs1345467   |
| 16         | 51.60995        | Blood pressure measurement (high sodium and potassium intervention) | rs2030114   |
| 16         | 51.71587        | Response to platinum-based chemotherapy (carboplatin)               | rs1381451   |



# ProbtrackX\_L3\_unc\_r

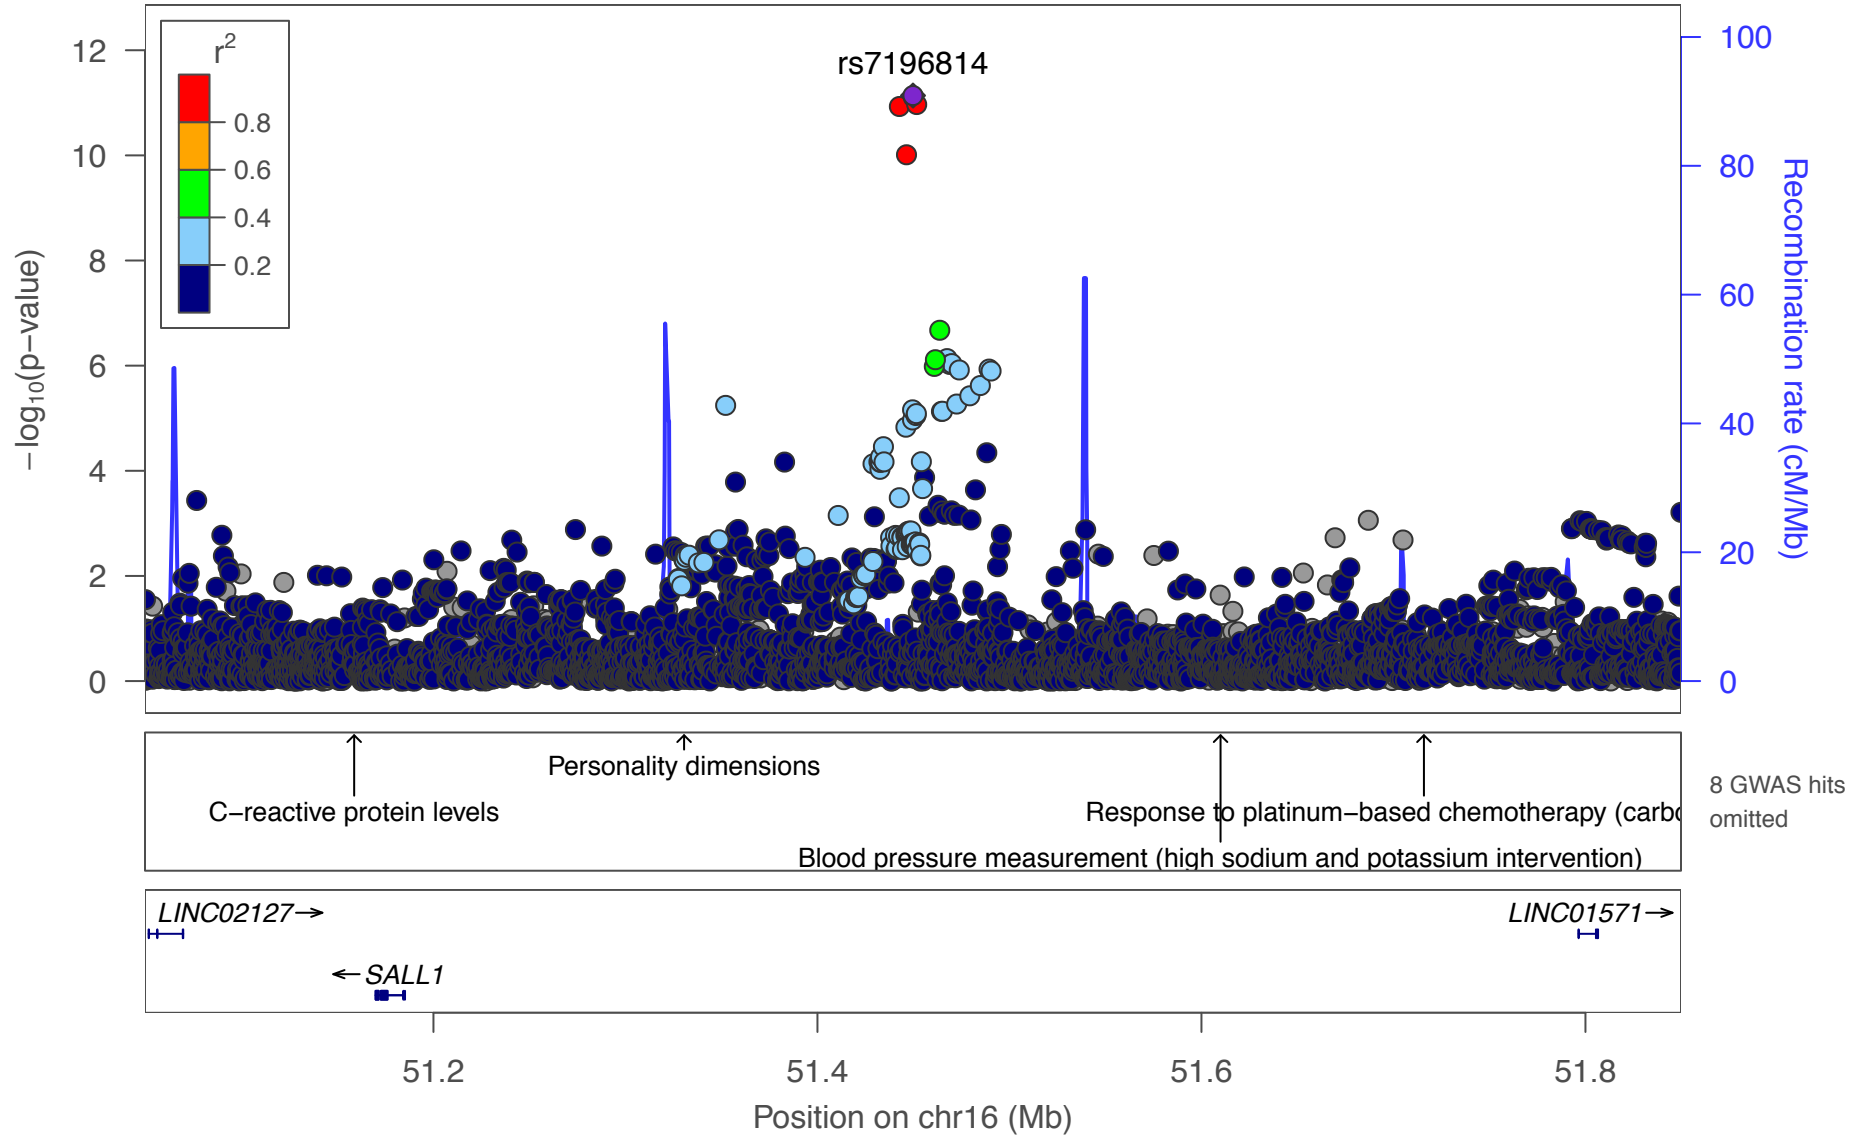

date: Thu Aug 17 18:52:05 2017

build: hg19

display range: chr16:51049760–51849760 [51049760–51849760]

hilite range: 0 – 0 [ 0 – 0 ]

reference SNP: chr16:51449760

number of SNPs plotted: 3808

min P.value: 7.28E–12 [chr16:51449760]

max P.value: 10E–1 [chr16:51142360]

omitted GWAS Hits: NA, NA

omitted GWAS Hits: NA, NA

omitted GWAS Hits: NA, NA

## GWAS Catalog SNPs in Region

| <b>chr</b> | <b>pos (Mb)</b> | <b>trait</b>                                                        | <b>snp</b>  |
|------------|-----------------|---------------------------------------------------------------------|-------------|
| 16         | 51.06153        | Post bronchodilator FEV1/FVC ratio                                  | rs147153117 |
| 16         | 51.15871        | C-reactive protein levels                                           | rs10521222  |
| 16         | 51.18373        | Educational attainment (years of education)                         | rs11643654  |
| 16         | 51.24549        | Weight loss (gastric bypass surgery)                                | rs7185923   |
| 16         | 51.33053        | Personality dimensions                                              | rs4131099   |
| 16         | 51.35748        | Left superior temporal gyrus thickness (schizophrenia interaction)  | rs17338034  |
| 16         | 51.42891        | Optic cup area                                                      | rs11646917  |
| 16         | 51.45829        | Optic disc parameters                                               | rs1362756   |
| 16         | 51.45829        | Optic disc area                                                     | rs1362756   |
| 16         | 51.48232        | Vertical cup-disc ratio                                             | rs1345467   |
| 16         | 51.60995        | Blood pressure measurement (high sodium and potassium intervention) | rs2030114   |
| 16         | 51.71587        | Response to platinum-based chemotherapy (carboplatin)               | rs1381451   |

# ProbtrackX\_ISOVF\_unc\_r

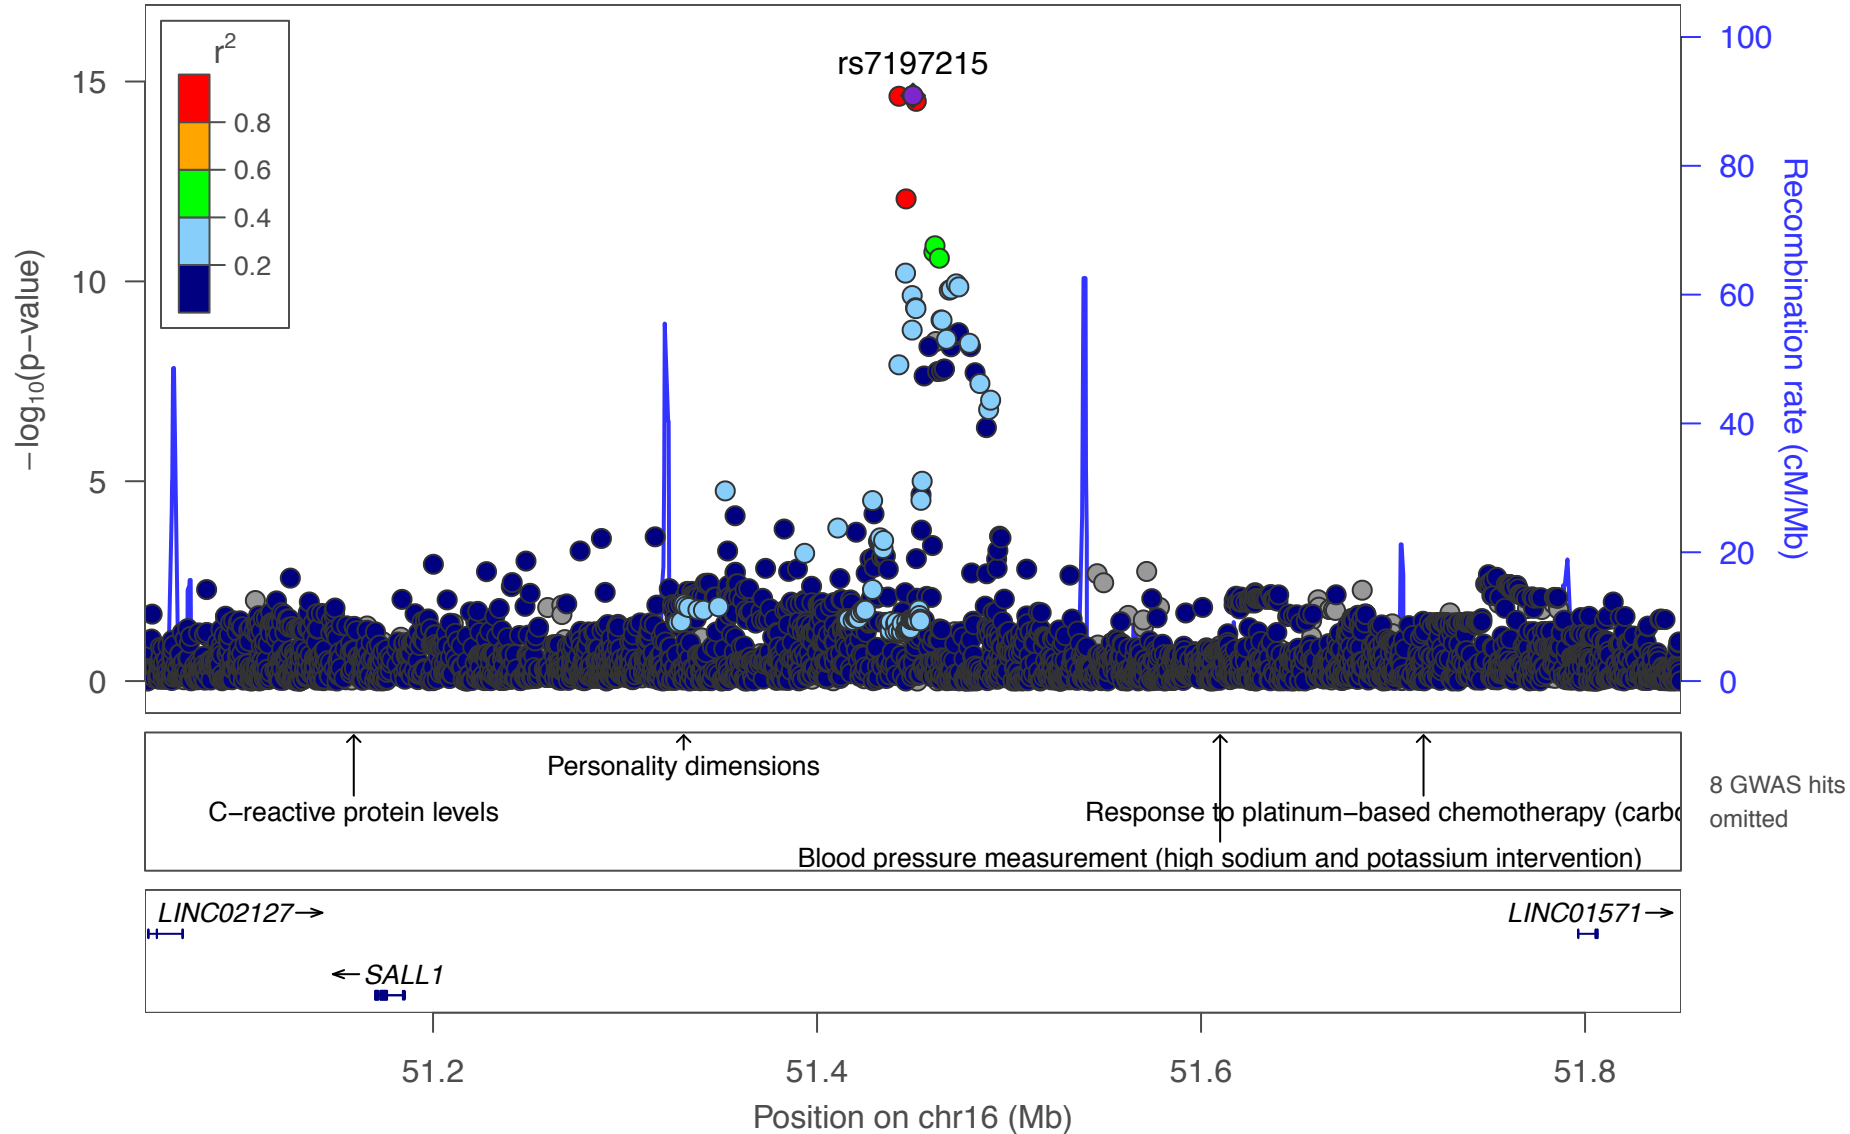

date: Thu Aug 17 18:52:16 2017

build: hg19

display range: chr16:51049978–51849978 [51049978–51849978]

hilite range: 0 – 0 [ 0 – 0 ]

reference SNP: chr16:51449978

number of SNPs plotted: 3805

min P.value: 2.24E–15 [chr16:51449978]

max P.value: 10E–1 [chr16:51130463]

omitted GWAS Hits: NA, NA

omitted GWAS Hits: NA, NA

omitted GWAS Hits: NA, NA

## GWAS Catalog SNPs in Region

| <b>chr</b> | <b>pos (Mb)</b> | <b>trait</b>                                                        | <b>snp</b>  |
|------------|-----------------|---------------------------------------------------------------------|-------------|
| 16         | 51.06153        | Post bronchodilator FEV1/FVC ratio                                  | rs147153117 |
| 16         | 51.15871        | C-reactive protein levels                                           | rs10521222  |
| 16         | 51.18373        | Educational attainment (years of education)                         | rs11643654  |
| 16         | 51.24549        | Weight loss (gastric bypass surgery)                                | rs7185923   |
| 16         | 51.33053        | Personality dimensions                                              | rs4131099   |
| 16         | 51.35748        | Left superior temporal gyrus thickness (schizophrenia interaction)  | rs17338034  |
| 16         | 51.42891        | Optic cup area                                                      | rs11646917  |
| 16         | 51.45829        | Optic disc parameters                                               | rs1362756   |
| 16         | 51.45829        | Optic disc area                                                     | rs1362756   |
| 16         | 51.48232        | Vertical cup-disc ratio                                             | rs1345467   |
| 16         | 51.60995        | Blood pressure measurement (high sodium and potassium intervention) | rs2030114   |
| 16         | 51.71587        | Response to platinum-based chemotherapy (carboplatin)               | rs1381451   |

# FAST\_ROIs\_V\_cerebellum\_IX

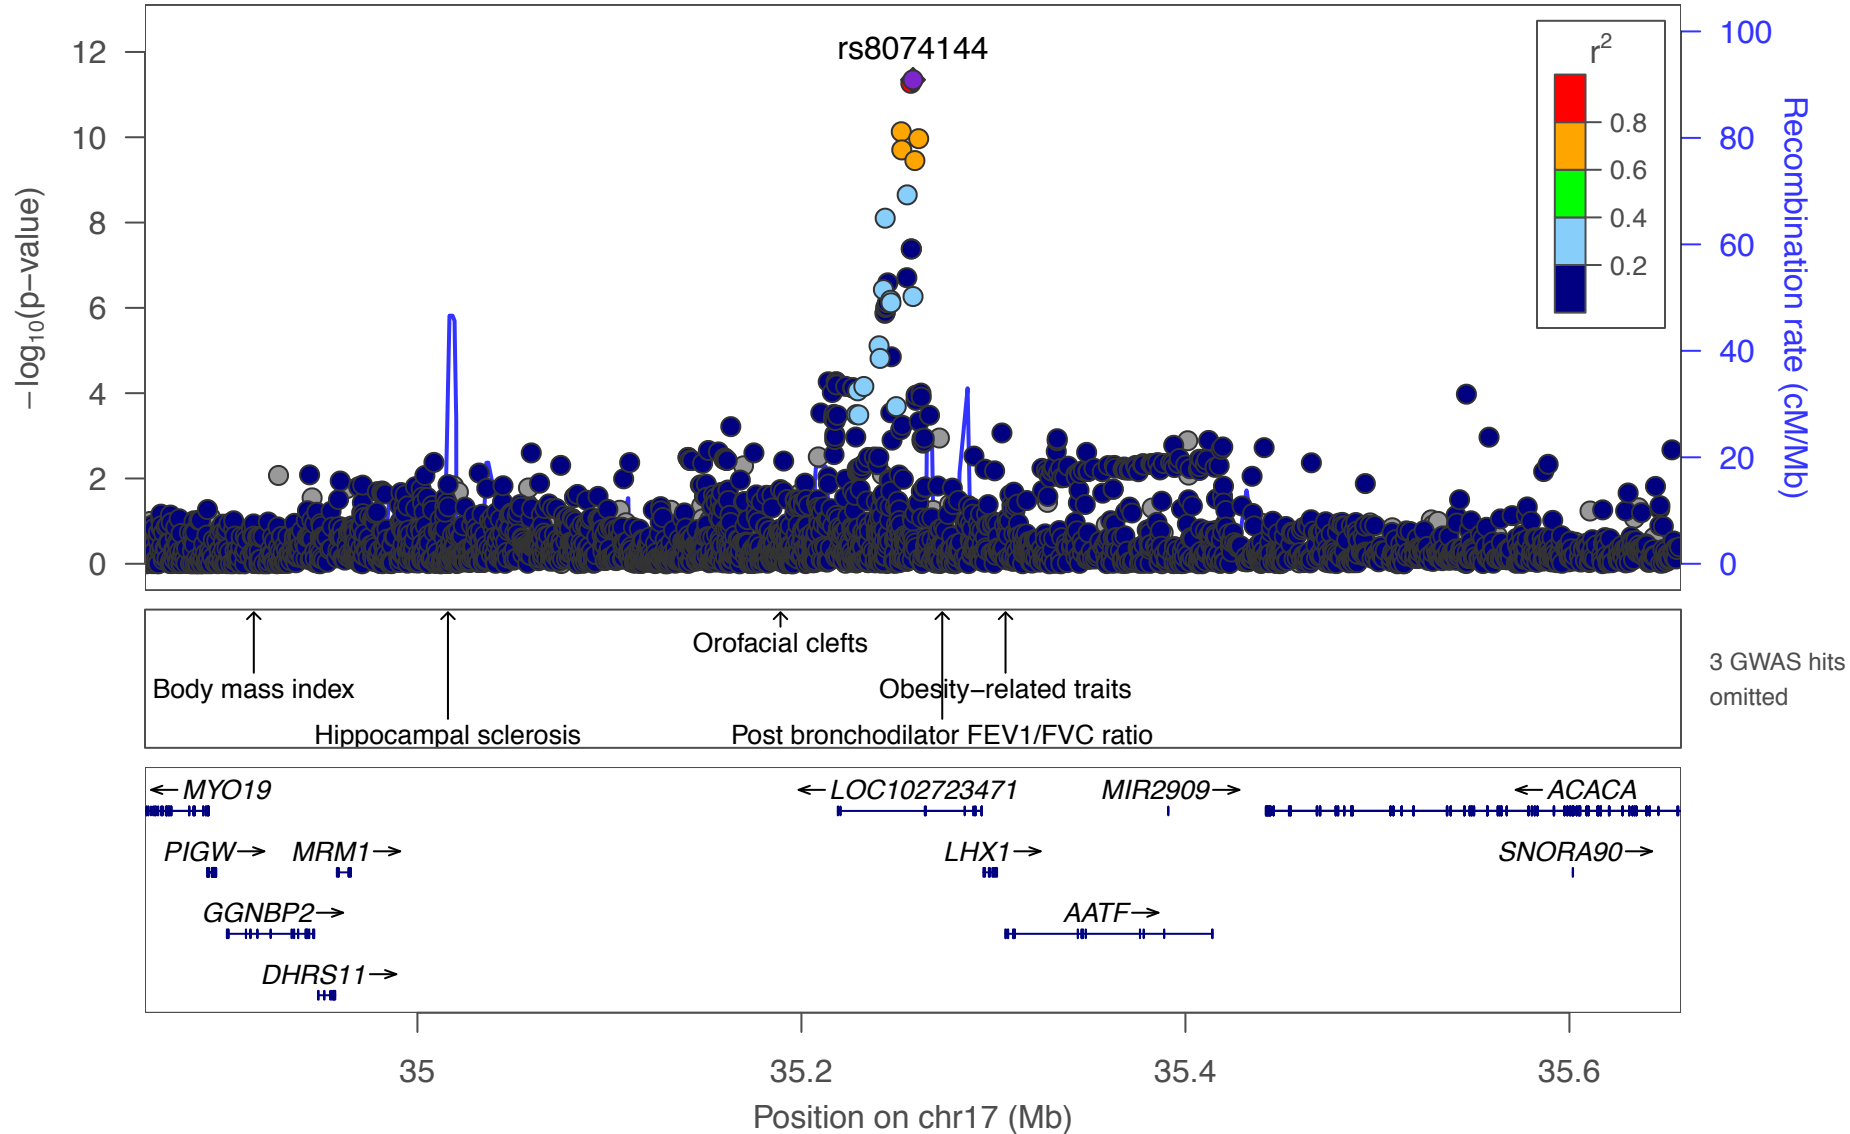

date: Thu Aug 17 19:10:54 2017

build: hg19

display range: chr17:34858114–35658114 [34858114–35658114]

hilite range: 0 – 0 [ 0 – 0 ]

reference SNP: chr17:35258114

number of SNPs plotted: 3369

min P.value: 4.5E–12 [chr17:35258114]

max P.value: 10E–1 [chr17:35195623]

omitted GWAS Hits: NA, NA



## GWAS Catalog SNPs in Region

| <b>chr</b> | <b>pos (Mb)</b> | <b>trait</b>                                         | <b>snp</b> |
|------------|-----------------|------------------------------------------------------|------------|
| 17         | 34.91479        | Body mass index                                      | rs12150665 |
| 17         | 35.01590        | Hippocampal sclerosis                                | rs12950363 |
| 17         | 35.18200        | Obstructive sleep apnea trait (apnea hipopnea index) | rs4796285  |
| 17         | 35.18909        | Orofacial clefts                                     | rs17138064 |
| 17         | 35.27092        | Post bronchodilator FEV1/FVC ratio                   | rs55955238 |
| 17         | 35.27334        | Post bronchodilator FEV1/FVC ratio                   | rs2003347  |
| 17         | 35.27428        | Post bronchodilator FEV1/FVC ratio                   | rs12185265 |
| 17         | 35.30631        | Obesity-related traits                               | rs2306658  |

# FAST\_ROIs\_L\_cerebellum\_IX

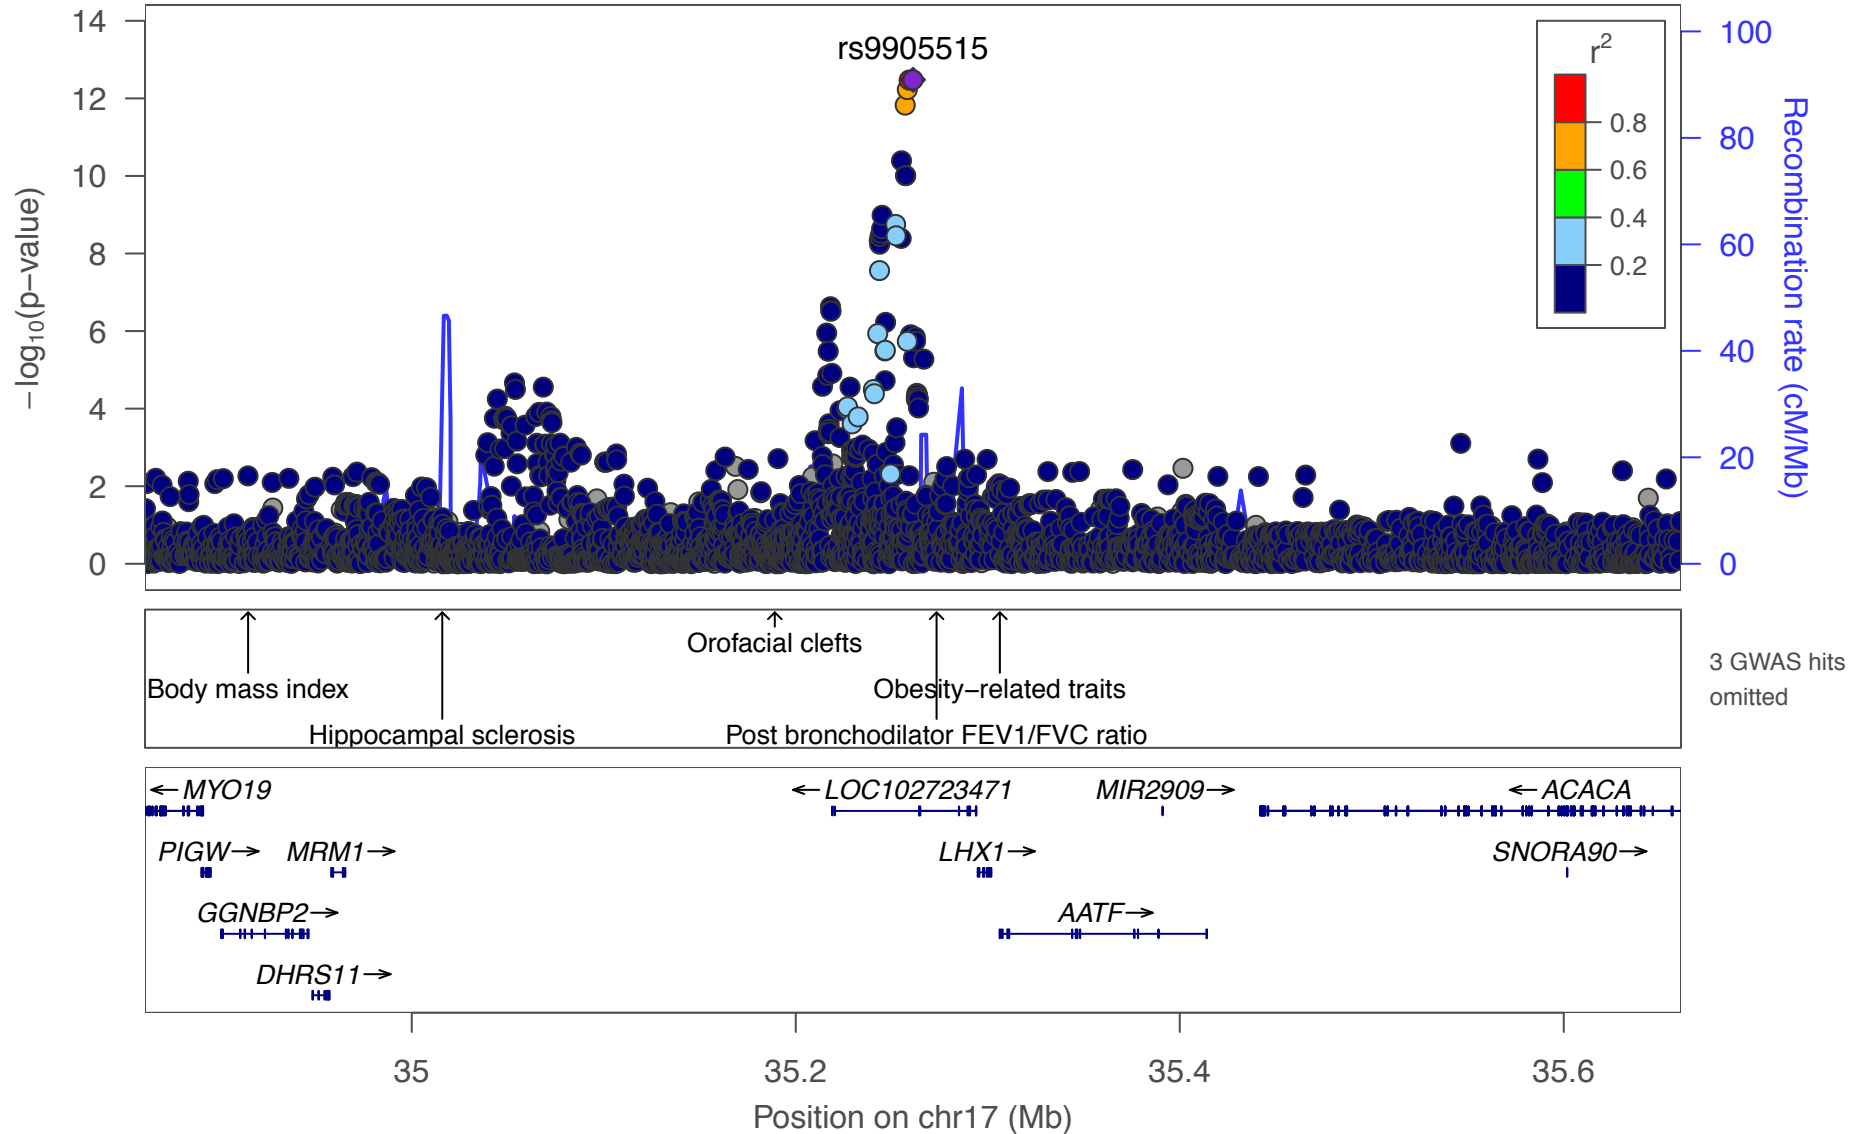

date: Thu Aug 17 19:10:55 2017

build: hg19

display range: chr17:34861073–35661073 [34861073–35661073]

hilite range: 0 – 0 [ 0 – 0 ]

reference SNP: chr17:35261073

number of SNPs plotted: 3367

min P.value: 3.32E–13 [chr17:35261073]

max P.value: 9.99E–1 [chr17:35070327]

omitted GWAS Hits: NA, NA

## GWAS Catalog SNPs in Region

| <b>chr</b> | <b>pos (Mb)</b> | <b>trait</b>                                         | <b>snp</b> |
|------------|-----------------|------------------------------------------------------|------------|
| 17         | 34.91479        | Body mass index                                      | rs12150665 |
| 17         | 35.01590        | Hippocampal sclerosis                                | rs12950363 |
| 17         | 35.18200        | Obstructive sleep apnea trait (apnea hipopnea index) | rs4796285  |
| 17         | 35.18909        | Orofacial clefts                                     | rs17138064 |
| 17         | 35.27092        | Post bronchodilator FEV1/FVC ratio                   | rs55955238 |
| 17         | 35.27334        | Post bronchodilator FEV1/FVC ratio                   | rs2003347  |
| 17         | 35.27428        | Post bronchodilator FEV1/FVC ratio                   | rs12185265 |
| 17         | 35.30631        | Obesity-related traits                               | rs2306658  |

# SWI\_T2star\_left\_caudate

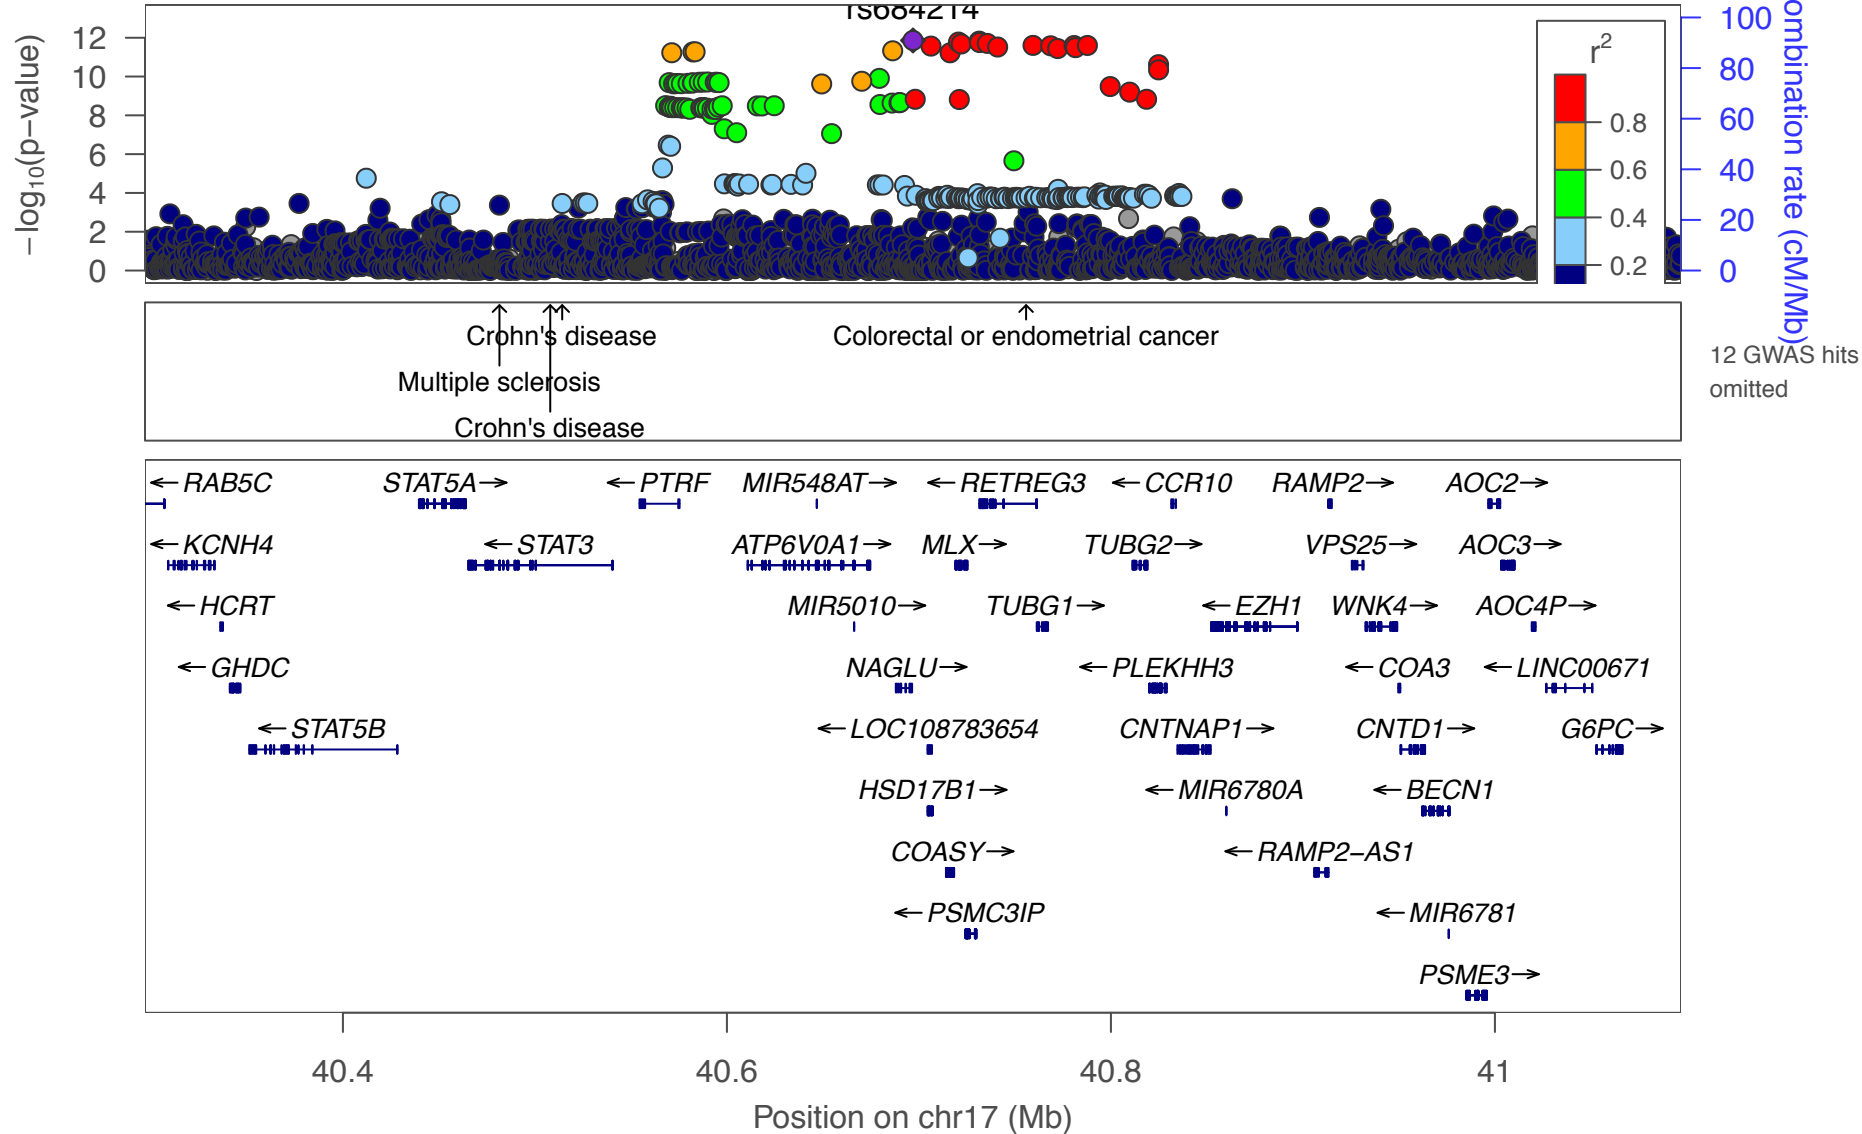

date: Thu Aug 17 19:02:56 2017

build: hg19

display range: chr17:40296915–41096915 [40296915–41096915]

hilite range: 0 – 0 [ 0 – 0 ]

reference SNP: chr17:40696915

number of SNPs plotted: 2522

min P.value: 1.38E–12 [chr17:40696915]

max P.value: 10E–1 [chr17:40698530]

omitted GWAS Hits: chr17:40.755811–Colorectal or endometrial cancer, NA

omitted GWAS Hits: NA, NA

omitted GWAS Hits: NA, NA

omitted GWAS Hits: NA, NA

## GWAS Catalog SNPs in Region

| <b>chr</b> | <b>pos (Mb)</b> | <b>trait</b>                                | <b>snp</b> |
|------------|-----------------|---------------------------------------------|------------|
| 17         | 40.48153        | Multiple sclerosis                          | rs2293152  |
| 17         | 40.48524        | Atopic dermatitis                           | rs17881320 |
| 17         | 40.49953        | Crohn's disease                             | rs6503695  |
| 17         | 40.50798        | Crohn's disease                             | rs9891119  |
| 17         | 40.50798        | Multiple sclerosis                          | rs9891119  |
| 17         | 40.51420        | Crohn's disease                             | rs744166   |
| 17         | 40.51420        | Multiple sclerosis                          | rs744166   |
| 17         | 40.51420        | Inflammatory bowel disease                  | rs744166   |
| 17         | 40.52754        | Ulcerative colitis                          | rs12942547 |
| 17         | 40.52754        | Crohn's disease                             | rs12942547 |
| 17         | 40.52754        | Inflammatory bowel disease                  | rs12942547 |
| 17         | 40.54221        | Atopic dermatitis                           | rs4796793  |
| 17         | 40.56504        | Psoriasis                                   | rs56364076 |
| 17         | 40.57077        | Crohn's disease                             | rs11871801 |
| 17         | 40.69334        | Systolic blood pressure change trajectories | rs630539   |
| 17         | 40.75581        | Colorectal or endometrial cancer            | rs9901225  |

# SWI\_T2star\_left\_caudate\_plus\_right\_caudate

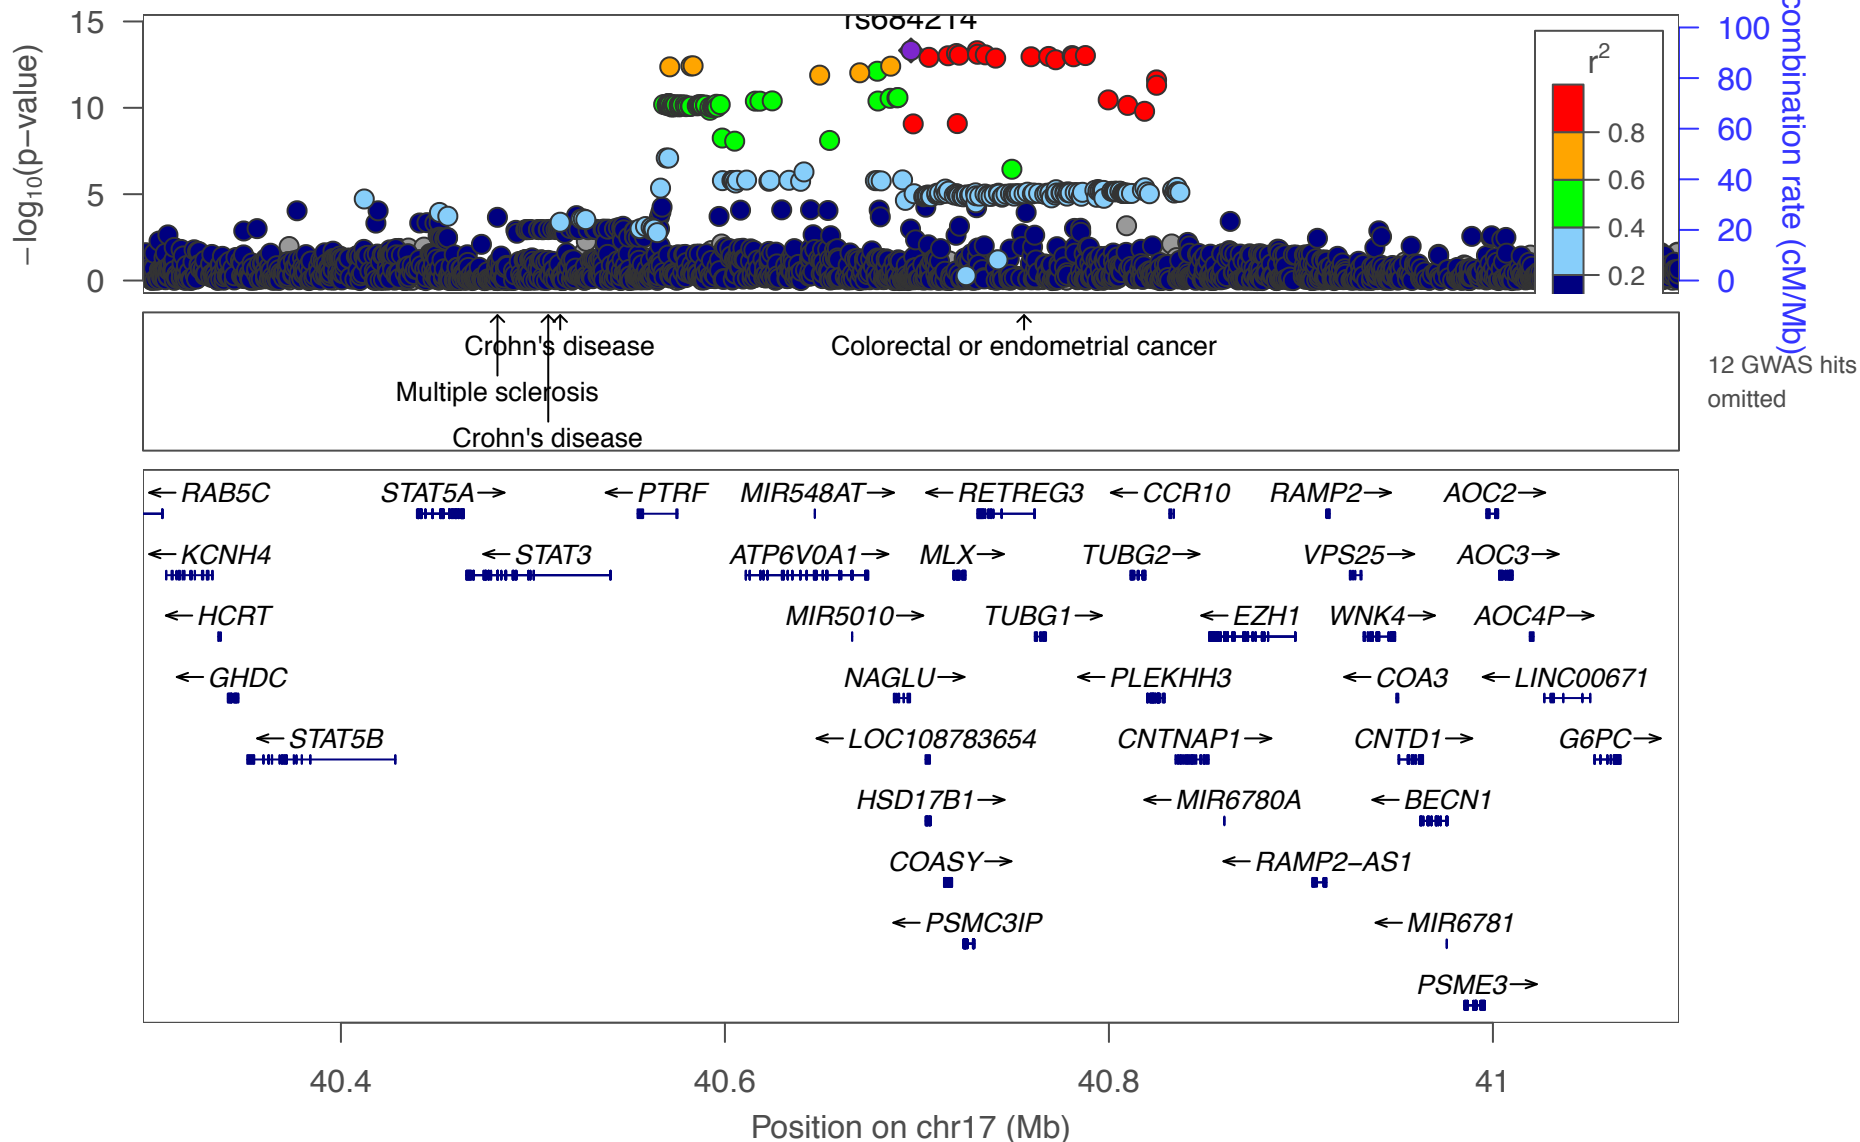



date: Thu Aug 17 19:03:05 2017

build: hg19

display range: chr17:40296915–41096915 [40296915–41096915]

hilite range: 0 – 0 [ 0 – 0 ]

reference SNP: chr17:40696915

number of SNPs plotted: 2522

min P.value: 4.78E–14 [chr17:40696915]

max P.value: 10E–1 [chr17:40880002]

omitted GWAS Hits: chr17:40.755811–Colorectal or endometrial cancer, NA

omitted GWAS Hits: NA, NA

omitted GWAS Hits: NA, NA

omitted GWAS Hits: NA, NA

## GWAS Catalog SNPs in Region

| <b>chr</b> | <b>pos (Mb)</b> | <b>trait</b>                                | <b>snp</b> |
|------------|-----------------|---------------------------------------------|------------|
| 17         | 40.48153        | Multiple sclerosis                          | rs2293152  |
| 17         | 40.48524        | Atopic dermatitis                           | rs17881320 |
| 17         | 40.49953        | Crohn's disease                             | rs6503695  |
| 17         | 40.50798        | Crohn's disease                             | rs9891119  |
| 17         | 40.50798        | Multiple sclerosis                          | rs9891119  |
| 17         | 40.51420        | Crohn's disease                             | rs744166   |
| 17         | 40.51420        | Multiple sclerosis                          | rs744166   |
| 17         | 40.51420        | Inflammatory bowel disease                  | rs744166   |
| 17         | 40.52754        | Ulcerative colitis                          | rs12942547 |
| 17         | 40.52754        | Crohn's disease                             | rs12942547 |
| 17         | 40.52754        | Inflammatory bowel disease                  | rs12942547 |
| 17         | 40.54221        | Atopic dermatitis                           | rs4796793  |
| 17         | 40.56504        | Psoriasis                                   | rs56364076 |
| 17         | 40.57077        | Crohn's disease                             | rs11871801 |
| 17         | 40.69334        | Systolic blood pressure change trajectories | rs630539   |
| 17         | 40.75581        | Colorectal or endometrial cancer            | rs9901225  |

# SWI\_T2star\_right\_caudate

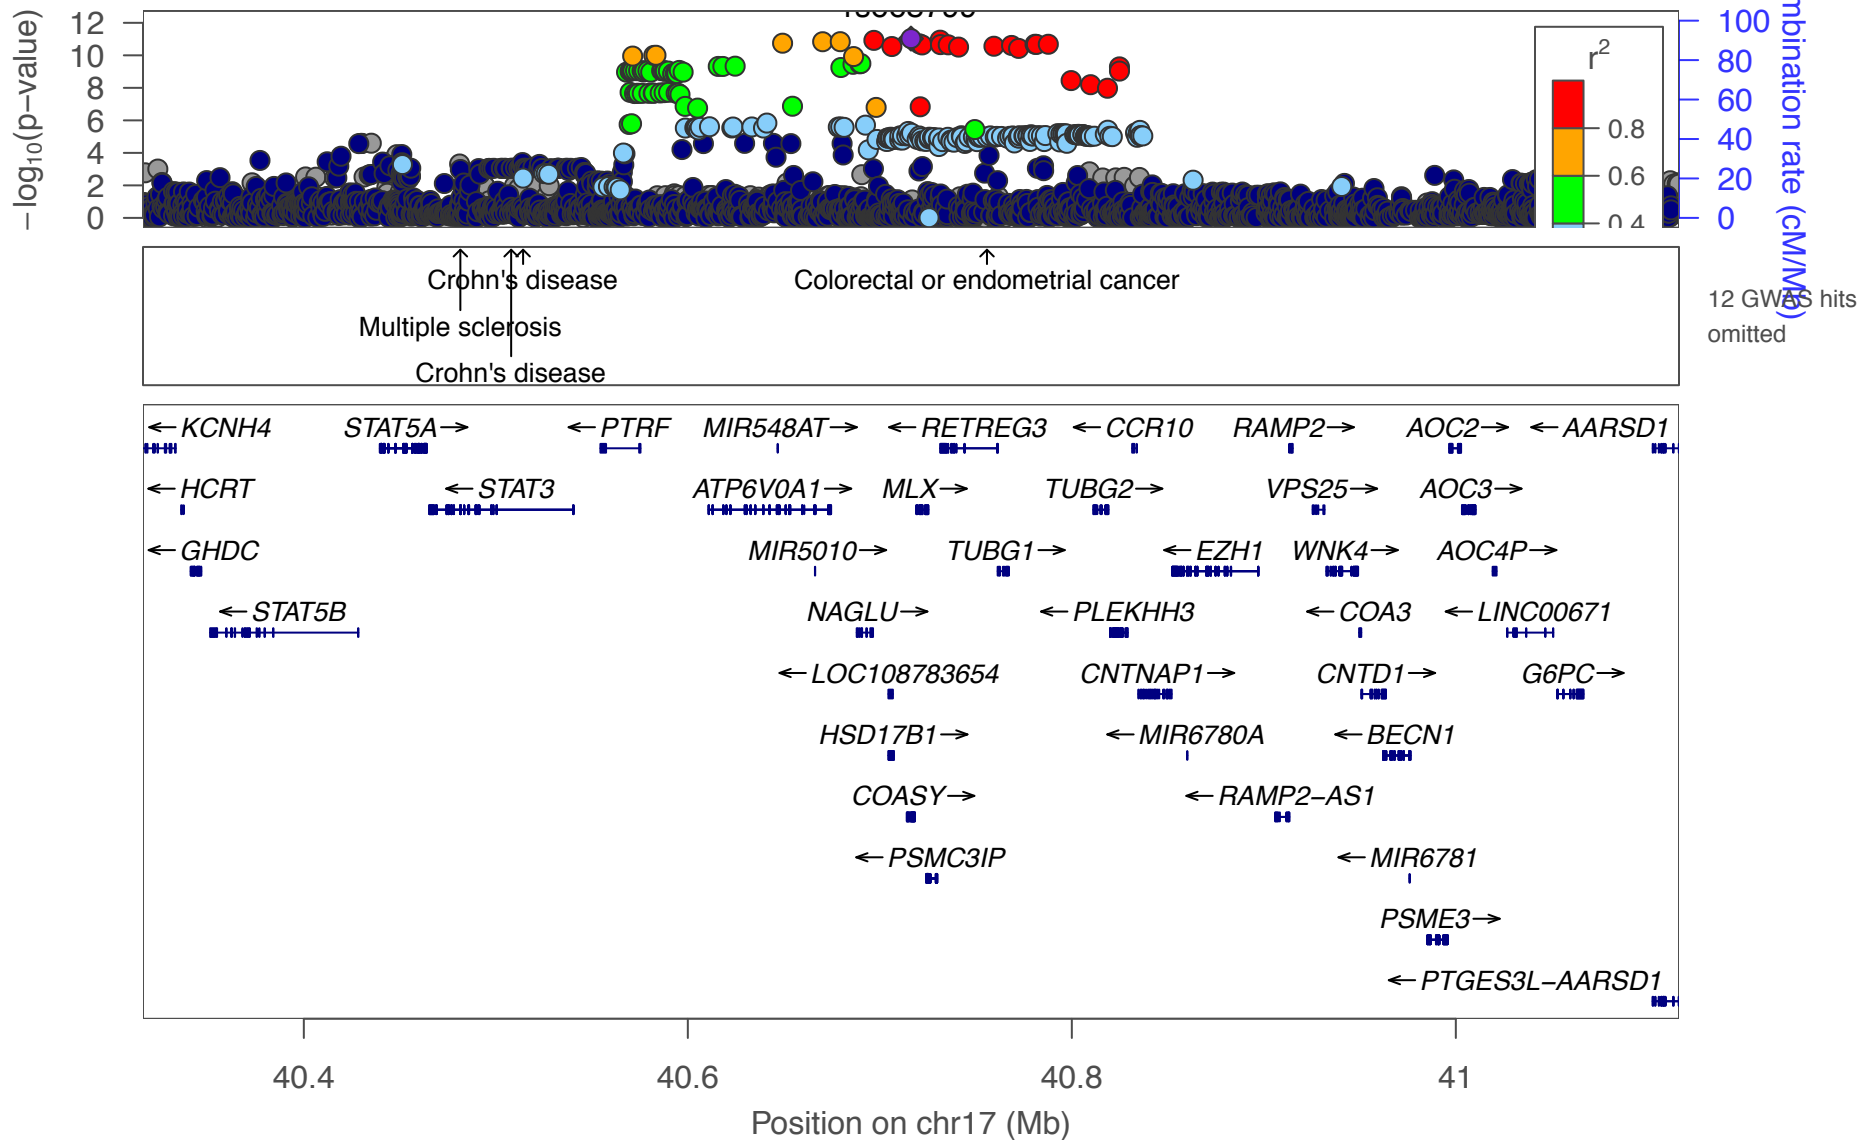

date: Thu Aug 17 19:17:10 2017

build: hg19

display range: chr17:40316235–41116235 [40316235–41116235]

hilite range: 0 – 0 [ 0 – 0 ]

reference SNP: chr17:40716235

number of SNPs plotted: 2501

min P.value: 9.33E–12 [chr17:40716235]

max P.value: 10E–1 [chr17:40892181]

omitted GWAS Hits: chr17:40.755811–Colorectal or endometrial cancer, NA

omitted GWAS Hits: NA, NA

omitted GWAS Hits: NA, NA

omitted GWAS Hits: NA, NA

## GWAS Catalog SNPs in Region

| <b>chr</b> | <b>pos (Mb)</b> | <b>trait</b>                                | <b>snp</b> |
|------------|-----------------|---------------------------------------------|------------|
| 17         | 40.48153        | Multiple sclerosis                          | rs2293152  |
| 17         | 40.48524        | Atopic dermatitis                           | rs17881320 |
| 17         | 40.49953        | Crohn's disease                             | rs6503695  |
| 17         | 40.50798        | Crohn's disease                             | rs9891119  |
| 17         | 40.50798        | Multiple sclerosis                          | rs9891119  |
| 17         | 40.51420        | Crohn's disease                             | rs744166   |
| 17         | 40.51420        | Multiple sclerosis                          | rs744166   |
| 17         | 40.51420        | Inflammatory bowel disease                  | rs744166   |
| 17         | 40.52754        | Ulcerative colitis                          | rs12942547 |
| 17         | 40.52754        | Crohn's disease                             | rs12942547 |
| 17         | 40.52754        | Inflammatory bowel disease                  | rs12942547 |
| 17         | 40.54221        | Atopic dermatitis                           | rs4796793  |
| 17         | 40.56504        | Psoriasis                                   | rs56364076 |
| 17         | 40.57077        | Crohn's disease                             | rs11871801 |
| 17         | 40.69334        | Systolic blood pressure change trajectories | rs630539   |
| 17         | 40.75581        | Colorectal or endometrial cancer            | rs9901225  |

# SWI\_T2star\_left\_putamen

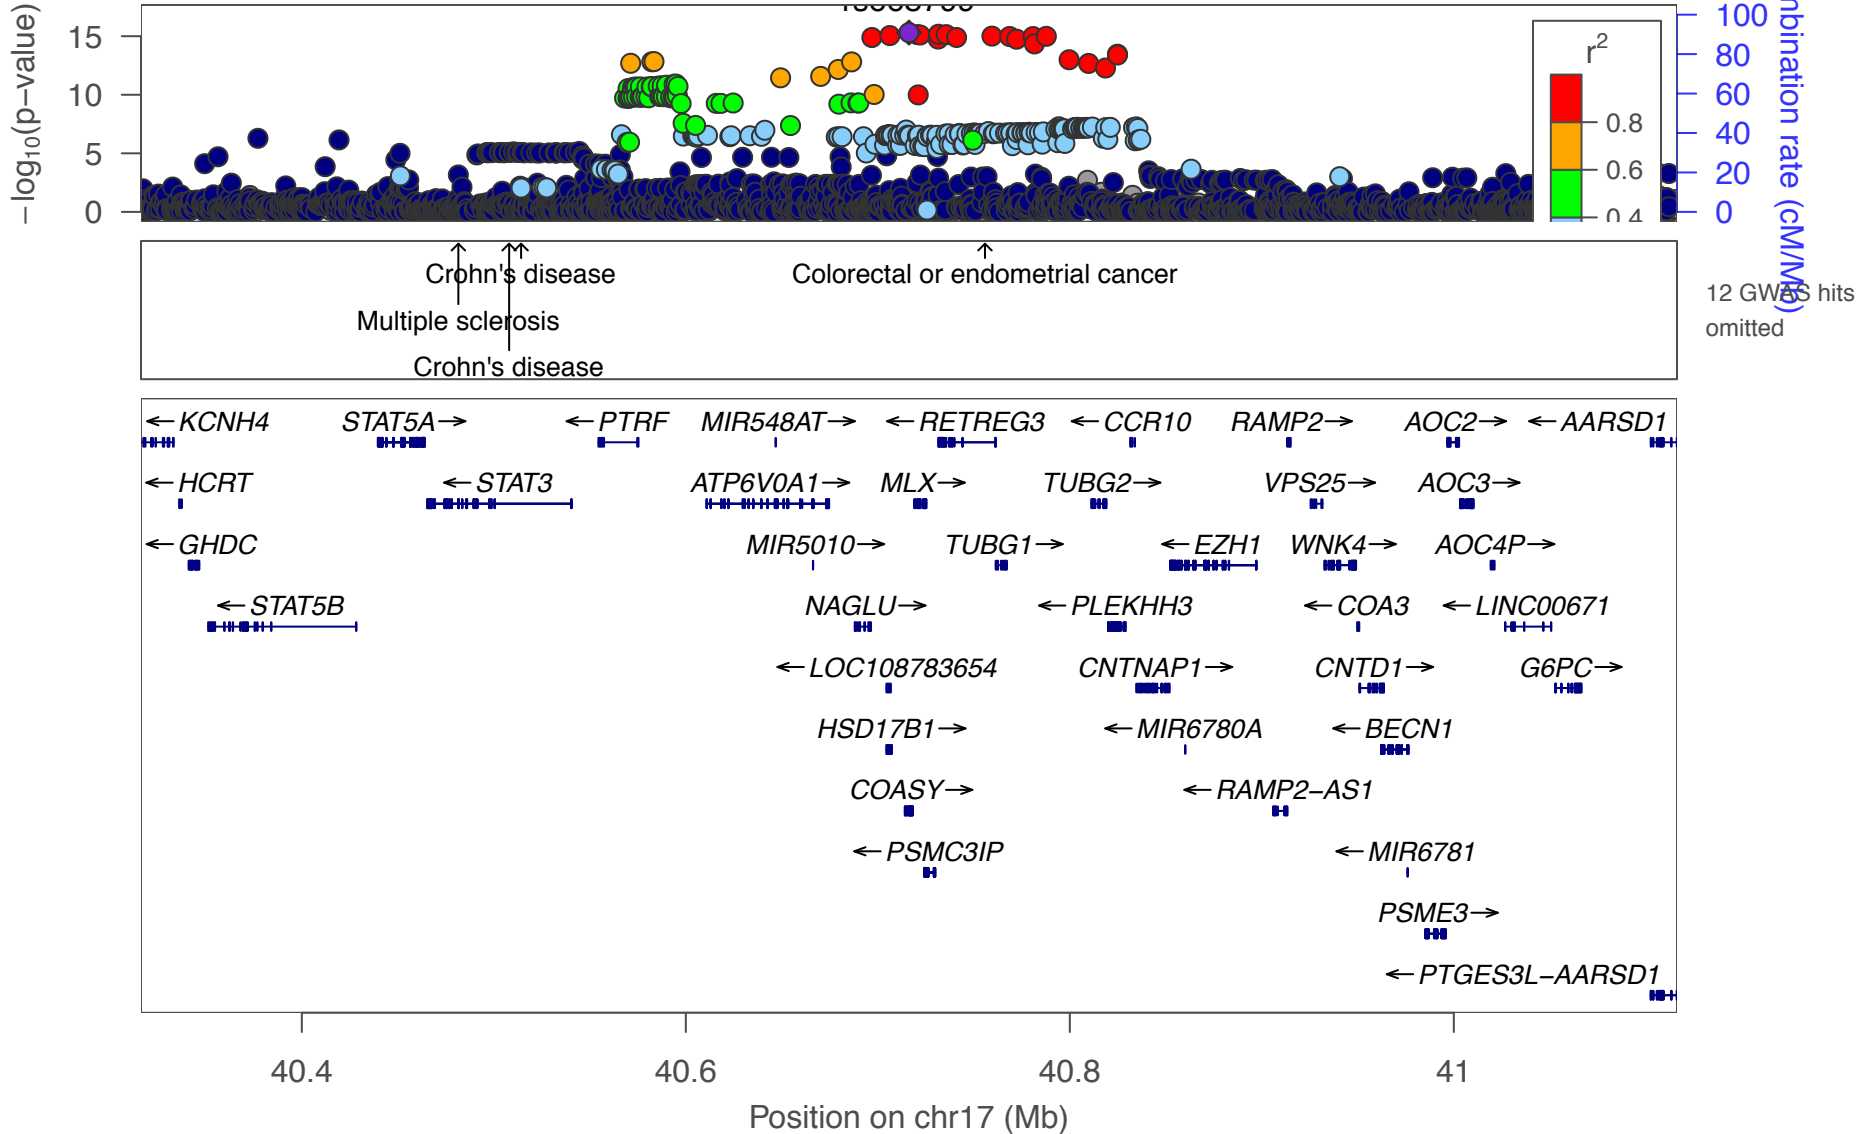

date: Thu Aug 17 19:17:10 2017

build: hg19

display range: chr17:40316235–41116235 [40316235–41116235]

hilite range: 0 – 0 [ 0 – 0 ]

reference SNP: chr17:40716235

number of SNPs plotted: 2501

min P.value: 4.91E–16 [chr17:40716235]

max P.value: 9.99E–1 [chr17:40910657]

omitted GWAS Hits: chr17:40.755811–Colorectal or endometrial cancer, NA

omitted GWAS Hits: NA, NA

omitted GWAS Hits: NA, NA

omitted GWAS Hits: NA, NA

## GWAS Catalog SNPs in Region

| <b>chr</b> | <b>pos (Mb)</b> | <b>trait</b>                                | <b>snp</b> |
|------------|-----------------|---------------------------------------------|------------|
| 17         | 40.48153        | Multiple sclerosis                          | rs2293152  |
| 17         | 40.48524        | Atopic dermatitis                           | rs17881320 |
| 17         | 40.49953        | Crohn's disease                             | rs6503695  |
| 17         | 40.50798        | Crohn's disease                             | rs9891119  |
| 17         | 40.50798        | Multiple sclerosis                          | rs9891119  |
| 17         | 40.51420        | Crohn's disease                             | rs744166   |
| 17         | 40.51420        | Multiple sclerosis                          | rs744166   |
| 17         | 40.51420        | Inflammatory bowel disease                  | rs744166   |
| 17         | 40.52754        | Ulcerative colitis                          | rs12942547 |
| 17         | 40.52754        | Crohn's disease                             | rs12942547 |
| 17         | 40.52754        | Inflammatory bowel disease                  | rs12942547 |
| 17         | 40.54221        | Atopic dermatitis                           | rs4796793  |
| 17         | 40.56504        | Psoriasis                                   | rs56364076 |
| 17         | 40.57077        | Crohn's disease                             | rs11871801 |
| 17         | 40.69334        | Systolic blood pressure change trajectories | rs630539   |
| 17         | 40.75581        | Colorectal or endometrial cancer            | rs9901225  |



# SWI\_T2star\_right\_putamen

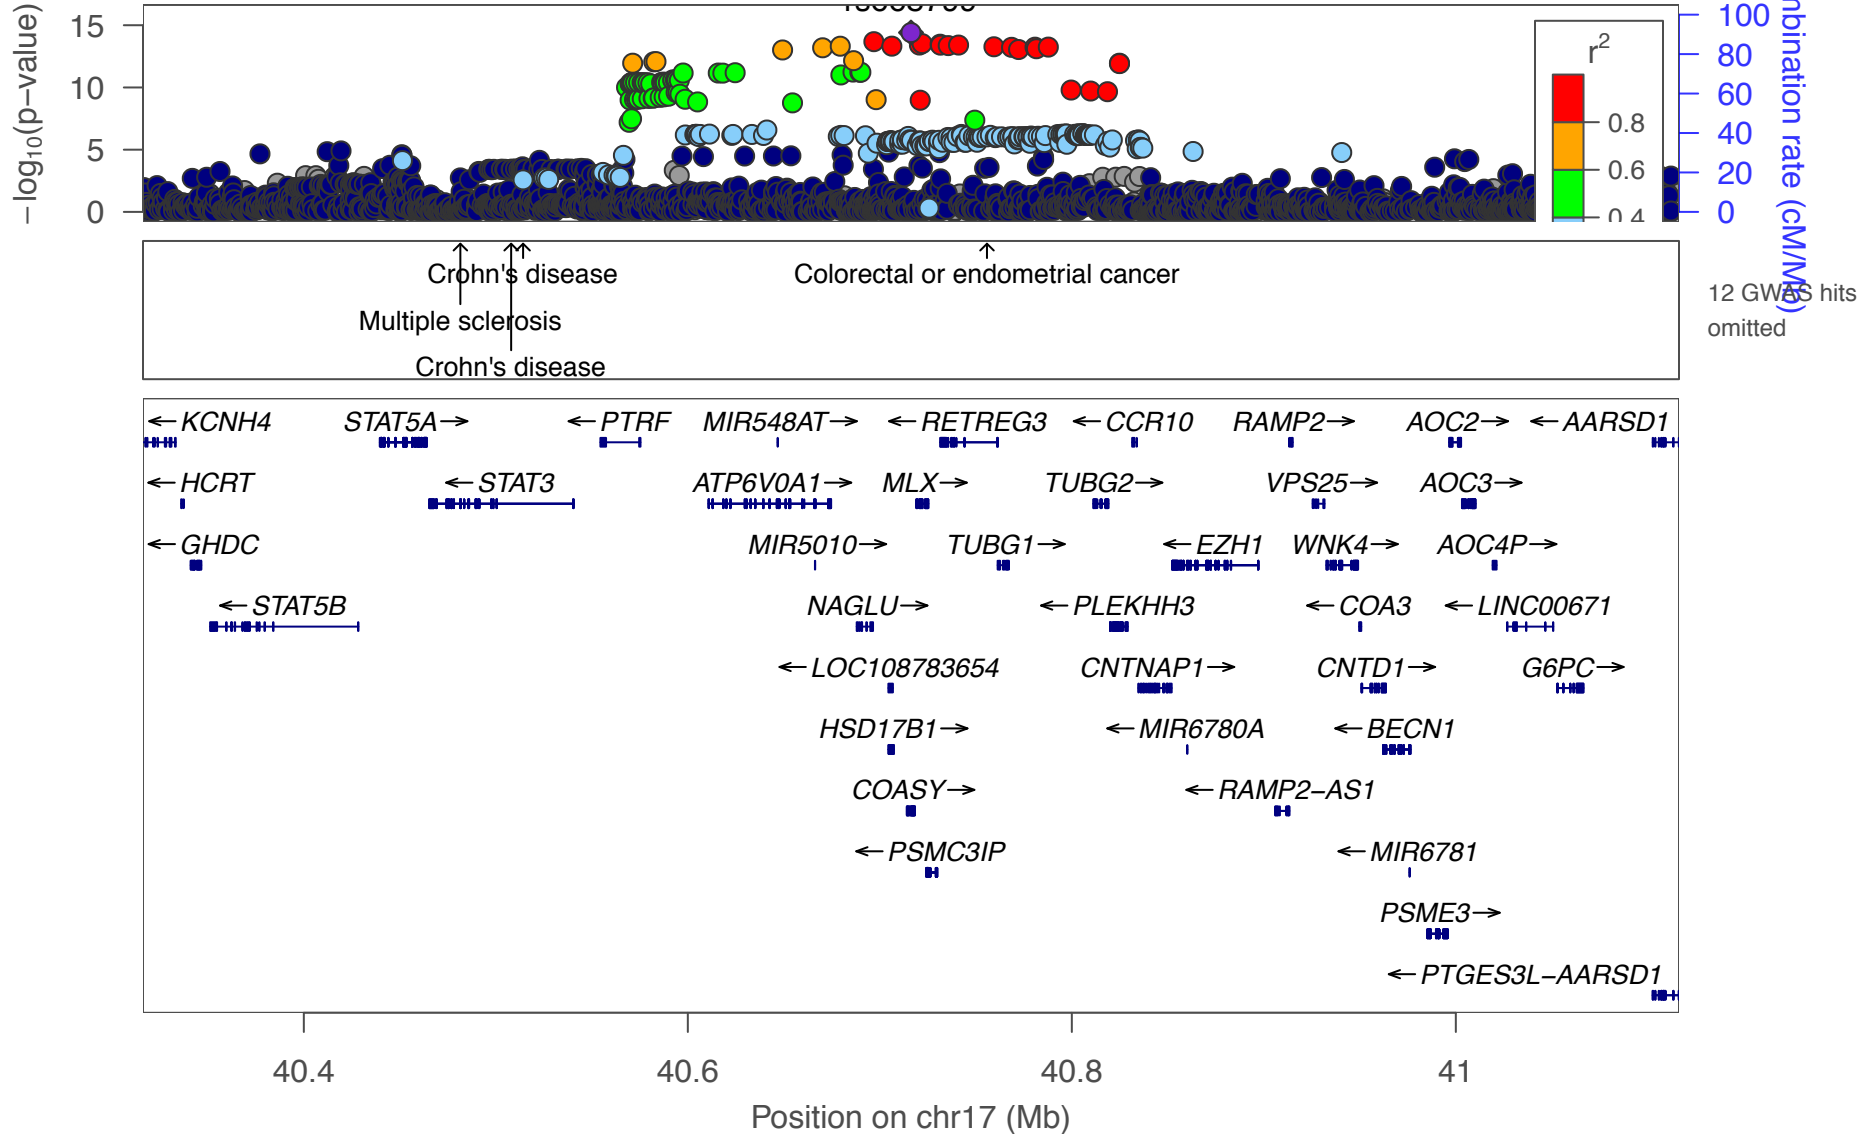

date: Thu Aug 17 19:04:35 2017

build: hg19

display range: chr17:40316235–41116235 [40316235–41116235]

hilite range: 0 – 0 [ 0 – 0 ]

reference SNP: chr17:40716235

number of SNPs plotted: 2501

min P.value: 3.9E–15 [chr17:40716235]

max P.value: 10E–1 [chr17:40916235]

omitted GWAS Hits: chr17:40.755811–Colorectal or endometrial cancer, NA

omitted GWAS Hits: NA, NA

omitted GWAS Hits: NA, NA

omitted GWAS Hits: NA, NA

## GWAS Catalog SNPs in Region

| <b>chr</b> | <b>pos (Mb)</b> | <b>trait</b>                                | <b>snp</b> |
|------------|-----------------|---------------------------------------------|------------|
| 17         | 40.48153        | Multiple sclerosis                          | rs2293152  |
| 17         | 40.48524        | Atopic dermatitis                           | rs17881320 |
| 17         | 40.49953        | Crohn's disease                             | rs6503695  |
| 17         | 40.50798        | Crohn's disease                             | rs9891119  |
| 17         | 40.50798        | Multiple sclerosis                          | rs9891119  |
| 17         | 40.51420        | Crohn's disease                             | rs744166   |
| 17         | 40.51420        | Multiple sclerosis                          | rs744166   |
| 17         | 40.51420        | Inflammatory bowel disease                  | rs744166   |
| 17         | 40.52754        | Ulcerative colitis                          | rs12942547 |
| 17         | 40.52754        | Crohn's disease                             | rs12942547 |
| 17         | 40.52754        | Inflammatory bowel disease                  | rs12942547 |
| 17         | 40.54221        | Atopic dermatitis                           | rs4796793  |
| 17         | 40.56504        | Psoriasis                                   | rs56364076 |
| 17         | 40.57077        | Crohn's disease                             | rs11871801 |
| 17         | 40.69334        | Systolic blood pressure change trajectories | rs630539   |
| 17         | 40.75581        | Colorectal or endometrial cancer            | rs9901225  |

# SWI\_T2star\_left\_putamen\_plus\_right\_putamen

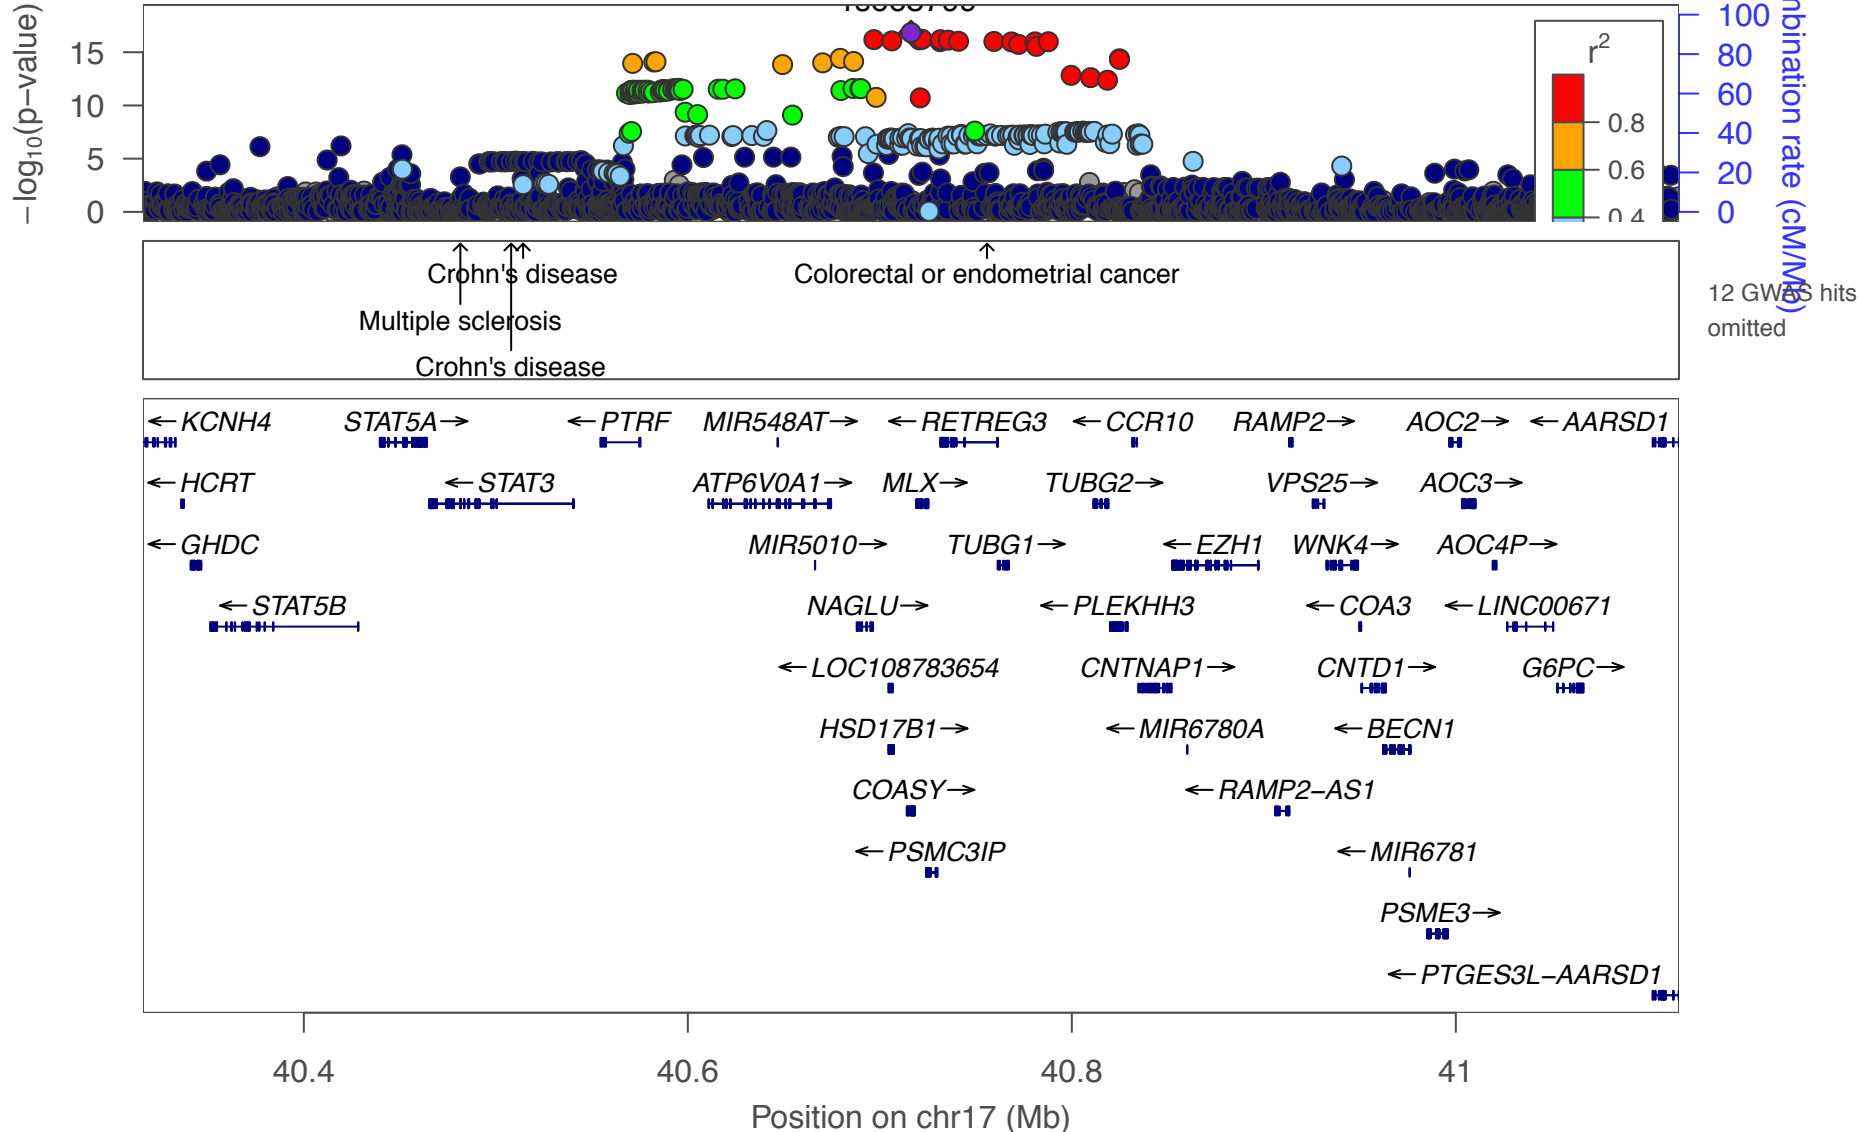

date: Thu Aug 17 19:04:35 2017

build: hg19

display range: chr17:40316235–41116235 [40316235–41116235]

hilite range: 0 – 0 [ 0 – 0 ]

reference SNP: chr17:40716235

number of SNPs plotted: 2501

min P.value: 1.43E–17 [chr17:40716235]

max P.value: 10E–1 [chr17:40366396]

omitted GWAS Hits: chr17:40.755811–Colorectal or endometrial cancer, NA

omitted GWAS Hits: NA, NA

omitted GWAS Hits: NA, NA

omitted GWAS Hits: NA, NA

## GWAS Catalog SNPs in Region

| <b>chr</b> | <b>pos (Mb)</b> | <b>trait</b>                                | <b>snp</b> |
|------------|-----------------|---------------------------------------------|------------|
| 17         | 40.48153        | Multiple sclerosis                          | rs2293152  |
| 17         | 40.48524        | Atopic dermatitis                           | rs17881320 |
| 17         | 40.49953        | Crohn's disease                             | rs6503695  |
| 17         | 40.50798        | Crohn's disease                             | rs9891119  |
| 17         | 40.50798        | Multiple sclerosis                          | rs9891119  |
| 17         | 40.51420        | Crohn's disease                             | rs744166   |
| 17         | 40.51420        | Multiple sclerosis                          | rs744166   |
| 17         | 40.51420        | Inflammatory bowel disease                  | rs744166   |
| 17         | 40.52754        | Ulcerative colitis                          | rs12942547 |
| 17         | 40.52754        | Crohn's disease                             | rs12942547 |
| 17         | 40.52754        | Inflammatory bowel disease                  | rs12942547 |
| 17         | 40.54221        | Atopic dermatitis                           | rs4796793  |
| 17         | 40.56504        | Psoriasis                                   | rs56364076 |
| 17         | 40.57077        | Crohn's disease                             | rs11871801 |
| 17         | 40.69334        | Systolic blood pressure change trajectories | rs630539   |
| 17         | 40.75581        | Colorectal or endometrial cancer            | rs9901225  |

# T2\_FLAIR\_BIANCA\_WMH\_volume

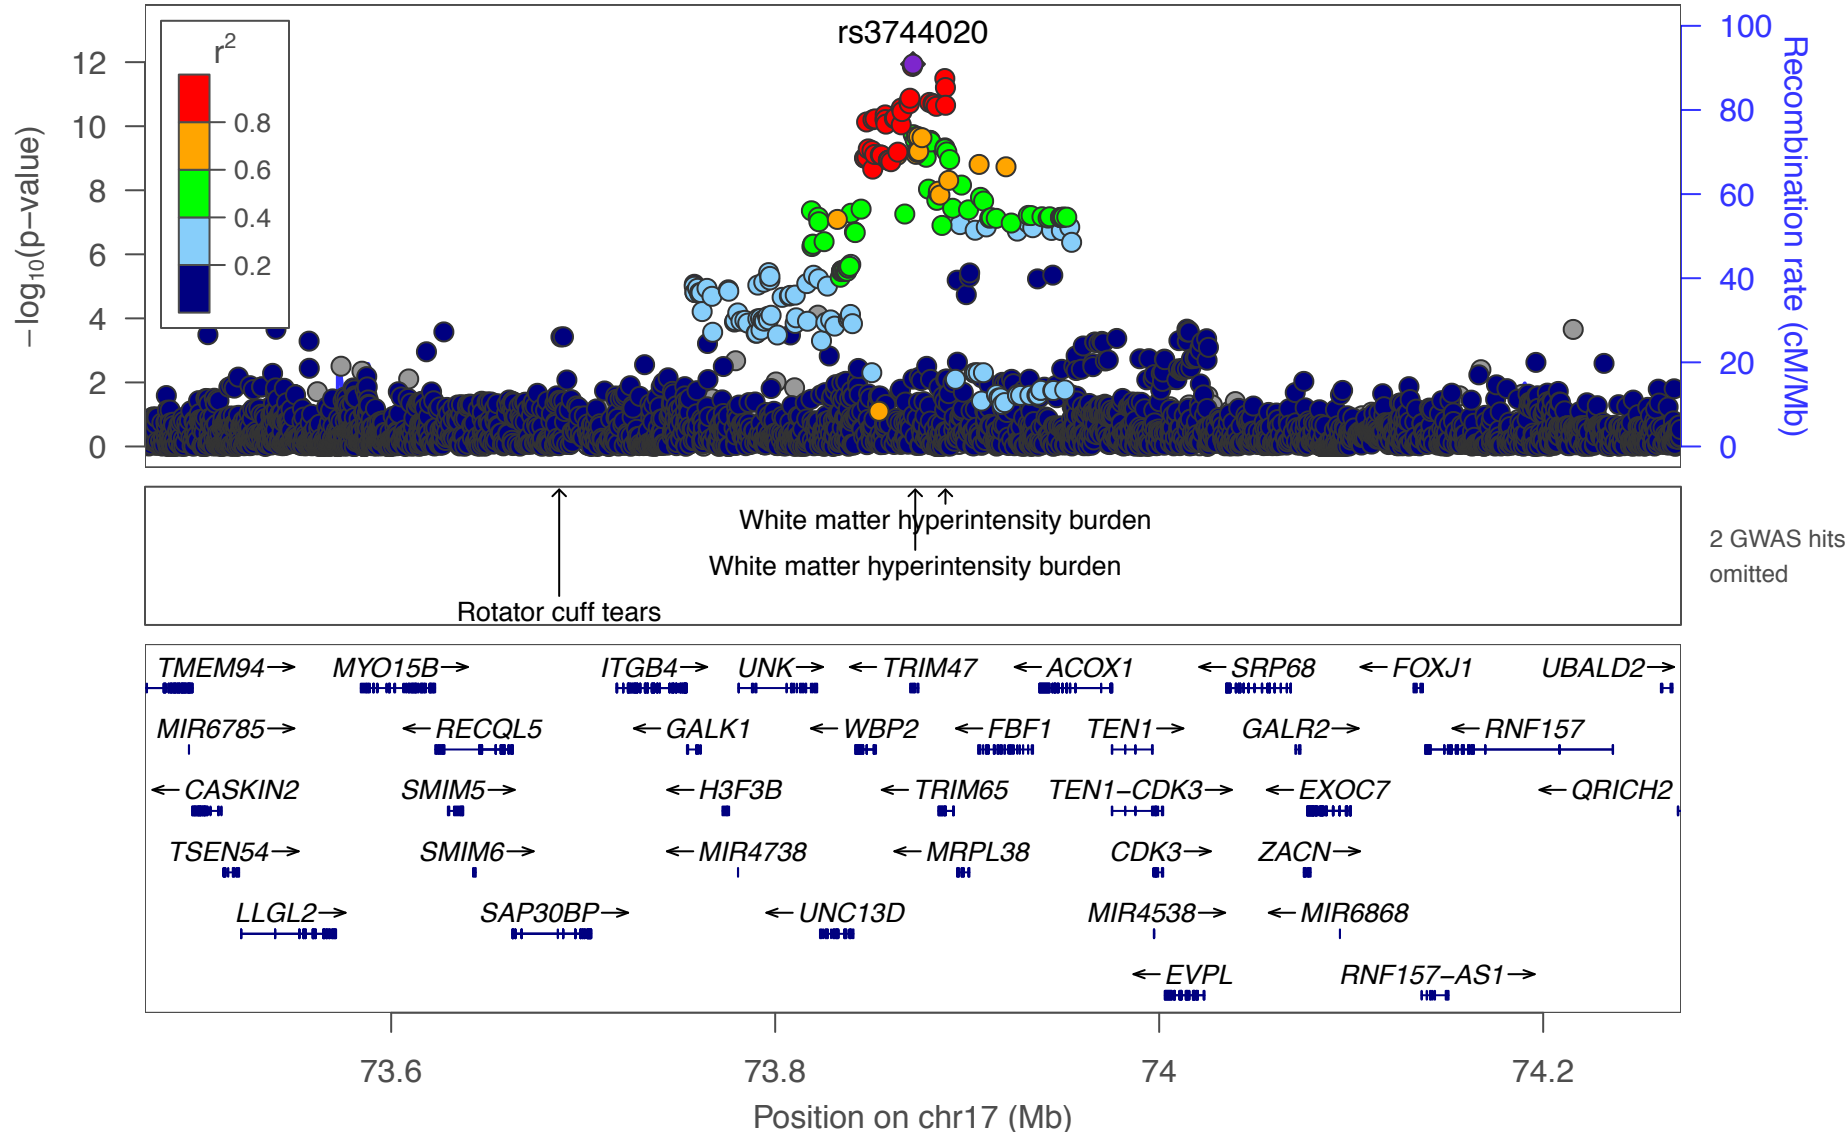

date: Thu Aug 17 19:11:55 2017

build: hg19

display range: chr17:73471773–74271773 [73471773–74271773]

hilite range: 0 – 0 [ 0 – 0 ]

reference SNP: chr17:73871773

number of SNPs plotted: 3811

min P.value: 1.15E–12 [chr17:73871773]

max P.value: 10E–1 [chr17:73572178]

omitted GWAS Hits: NA, NA



## GWAS Catalog SNPs in Region

| <b>chr</b> | <b>pos (Mb)</b> | <b>trait</b>                       | <b>snp</b> |
|------------|-----------------|------------------------------------|------------|
| 17         | 73.68749        | Rotator cuff tears                 | rs820218   |
| 17         | 73.68829        | Lip morphology                     | rs820217   |
| 17         | 73.87295        | White matter hyperintensity burden | rs1055129  |
| 17         | 73.88215        | White matter hyperintensity burden | rs7214628  |
| 17         | 73.88867        | White matter hyperintensity burden | rs3744028  |

# TBSS\_MO\_Pontine\_crossing\_tract

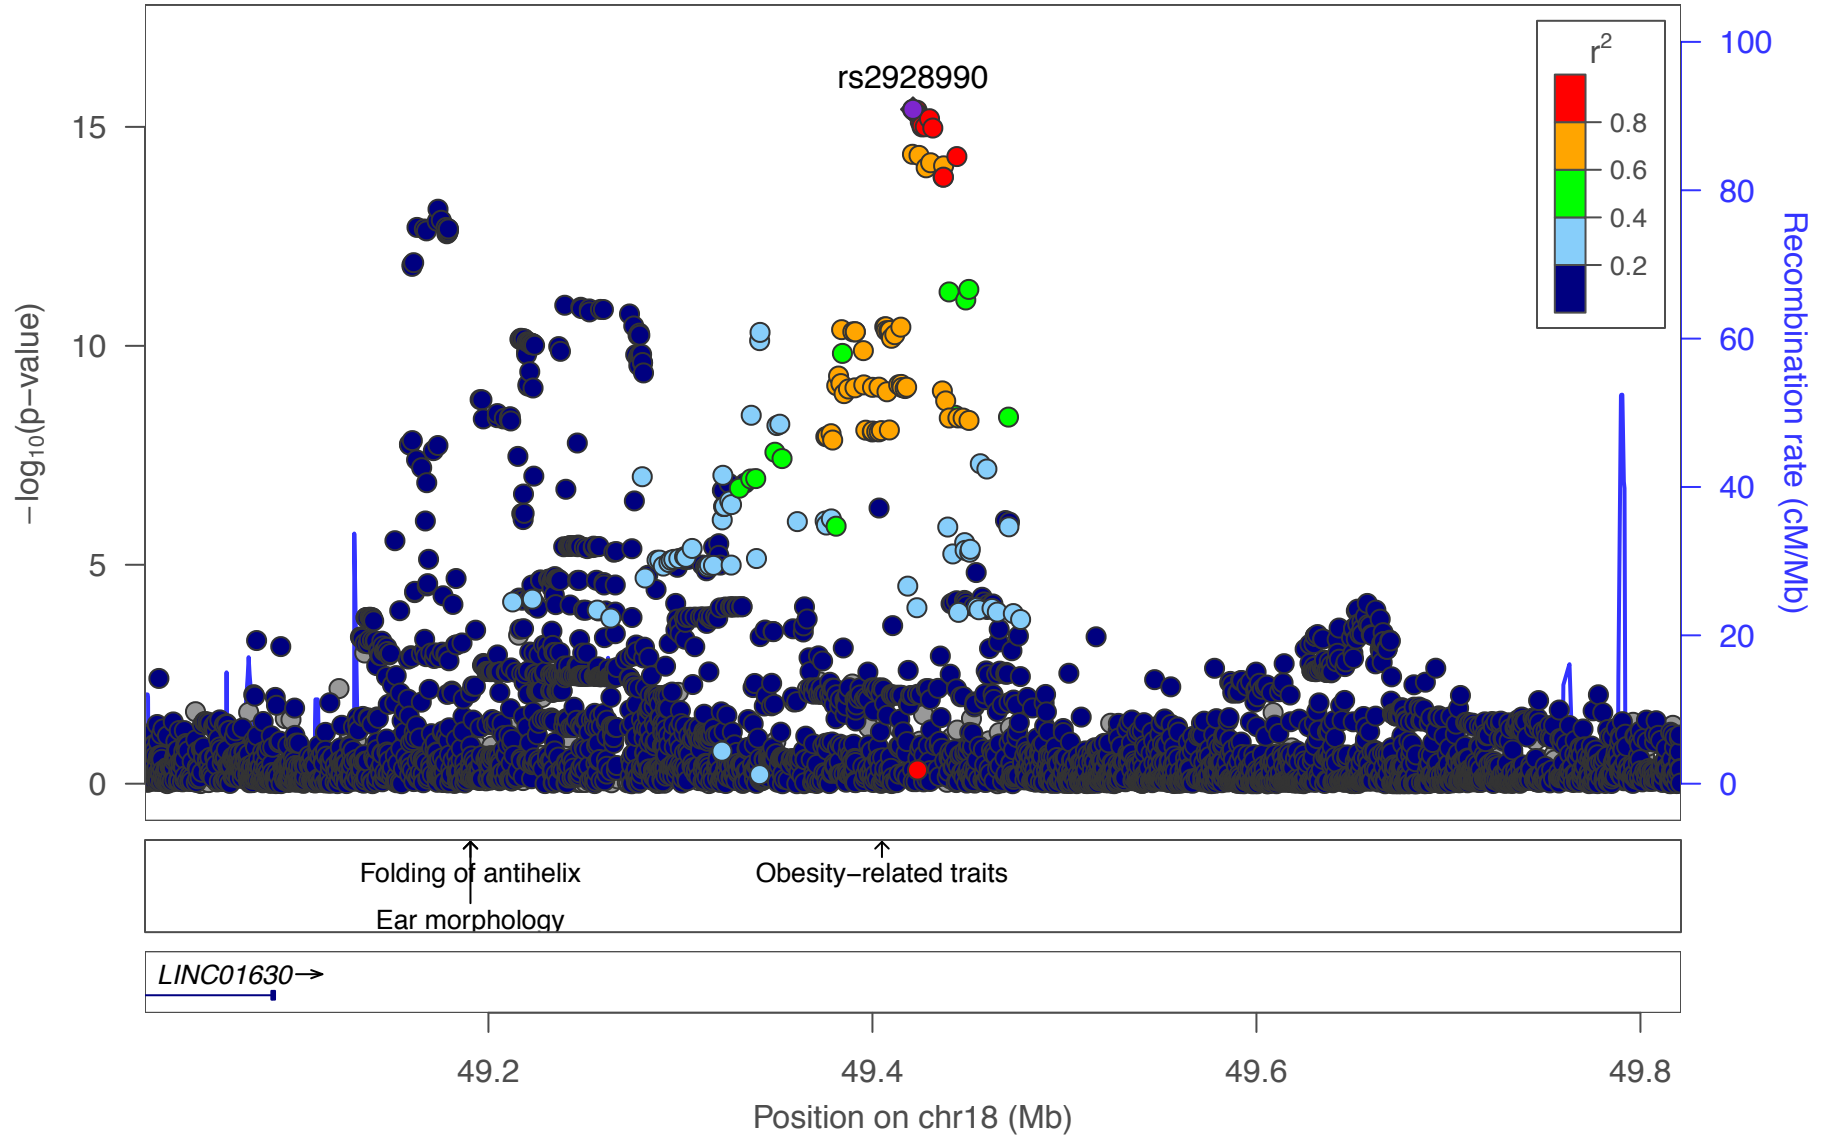

date: Thu Aug 17 19:01:51 2017

build: hg19

display range: chr18:49021125–49821125 [49021125–49821125]

hilite range: 0 – 0 [ 0 – 0 ]

reference SNP: chr18:49421125

number of SNPs plotted: 4230

min P.value: 3.97E–16 [chr18:49421125]

max P.value: 10E–1 [chr18:49667076]

## GWAS Catalog SNPs in Region

| <b>chr</b> | <b>pos (Mb)</b> | <b>trait</b>           | <b>snp</b> |
|------------|-----------------|------------------------|------------|
| 18         | 49.19064        | Folding of antihelix   | rs1619249  |
| 18         | 49.19064        | Ear morphology         | rs1619249  |
| 18         | 49.40496        | Obesity-related traits | rs1351435  |
